# Supplementary material for: Host–microbiome archetypes differentiate infection from pathogen carriage in the human lower airway
Source: Nat Commun. 2026 Apr 13;17:5149. doi: 10.1038/s41467-026-71863-5 (PMC13250161; doi:10.1038/s41467-026-71863-5)
Supplement: Supplementary file 3 — Supplementary Data 1 [file 41467_2026_71863_MOESM3_ESM.xlsx]

## Sheet: Sheet 1
SuppData1
	taxon	lfc_(Intercept)	lfc_infection_derivedLRTI	lfc_age	lfc_genderMale	se_(Intercept)	se_infection_derivedLRTI	se_age	se_genderMale	W_(Intercept)	W_infection_derivedLRTI	W_age	W_genderMale	p_(Intercept)	p_infection_derivedLRTI	p_age	p_genderMale	q_(Intercept)	q_infection_derivedLRTI	q_age	q_genderMale	diff_(Intercept)	diff_infection_derivedLRTI	diff_age	diff_genderMale	passed_ss_(Intercept)	passed_ss_infection_derivedLRTI	passed_ss_age	passed_ss_genderMale
1	Schaalia odontolytica	0.811184	-1.21956	0.0137789	0.0933805	0.429473	0.414929	0.0398041	0.304774	1.88879	-2.9392	0.346168	0.306392	0.0599801	0.00357206	0.729483	0.759539	0.521714	0.0388462	0.960633	0.994853	FALSE	TRUE	FALSE	FALSE	FALSE	TRUE	TRUE	TRUE
2	Veillonella dispar	0.354884	-0.582633	0.0180466	0.0423373	0.40479	0.382942	0.0431239	0.267661	0.876712	-1.52146	0.418483	0.158175	0.381414	0.129301	0.675923	0.874436	0.802129	0.356851	0.921244	0.994853	FALSE	FALSE	FALSE	FALSE	TRUE	FALSE	TRUE	TRUE
3	Veillonella parvula	0.133234	-0.221171	0.0448303	-0.149821	0.382408	0.354726	0.0397076	0.2578	0.348407	-0.623496	1.12901	-0.581153	0.727803	0.533479	0.259884	0.561617	0.904555	0.682539	0.748058	0.994853	FALSE	FALSE	FALSE	FALSE	TRUE	TRUE	FALSE	TRUE
4	Streptococcus thermophilus	0.46395	-0.519	-0.0329632	-0.0173291	0.370479	0.355677	0.0312643	0.240046	1.2523	-1.45919	-1.05434	-0.0721906	0.211533	0.145662	0.292658	0.942503	0.774756	0.372724	0.748058	0.994853	FALSE	FALSE	FALSE	FALSE	FALSE	FALSE	TRUE	TRUE
5	Staphylococcus epidermidis	0.221462	-0.382018	-0.017635	0.159721	0.40923	0.40698	0.0358097	0.258088	0.541166	-0.938664	-0.492463	0.618864	0.588835	0.348733	0.622788	0.536522	0.872836	0.572449	0.91121	0.994853	FALSE	FALSE	FALSE	FALSE	TRUE	FALSE	TRUE	TRUE
6	Prevotella oris	0.214731	-0.26796	0.0785974	-0.367163	0.395216	0.385907	0.0488531	0.27887	0.543325	-0.694364	1.60885	-1.31661	0.587349	0.488045	0.108805	0.189075	0.872836	0.655408	0.659912	0.994853	FALSE	FALSE	FALSE	FALSE	TRUE	TRUE	FALSE	TRUE
7	Prevotella melaninogenica	0.411243	-1.04971	0.160237	-0.0373798	0.524618	0.485794	0.0490259	0.33932	0.783891	-2.16081	3.26841	-0.110161	0.433784	0.0315795	0.00122008	0.912363	0.838648	0.144601	0.0353822	0.994853	FALSE	FALSE	TRUE	FALSE	TRUE	TRUE	TRUE	TRUE
8	Eikenella corrodens	0.662762	-0.848926	0.000280857	-0.0713429	0.356703	0.332441	0.0281093	0.216236	1.85802	-2.55362	0.0099916	-0.329931	0.0642428	0.0112048	0.992035	0.741705	0.521714	0.0812352	0.992035	0.994853	FALSE	FALSE	FALSE	FALSE	FALSE	TRUE	TRUE	TRUE
9	Neisseria sp.	0.89415	-1.19098	0.0225399	-0.120743	0.455014	0.420024	0.0366048	0.276277	1.9651	-2.8355	0.615762	-0.437038	0.0504161	0.00491758	0.538564	0.662429	0.521714	0.042783	0.91121	0.994853	FALSE	TRUE	FALSE	FALSE	FALSE	TRUE	TRUE	TRUE
10	Neisseria gonorrhoeae	0.289863	-0.402893	-0.0136881	0.0533336	0.29913	0.28735	0.0291242	0.208449	0.969019	-1.4021	-0.46999	0.25586	0.333393	0.162021	0.638738	0.798252	0.802129	0.380968	0.91121	0.994853	FALSE	FALSE	FALSE	FALSE	FALSE	FALSE	TRUE	TRUE
11	uncultured bacterium	-0.0665532	-0.273652	0.0734568	0.142046	0.504992	0.455406	0.0523207	0.322758	-0.131791	-0.600896	1.40397	0.440101	0.895247	0.548408	0.161463	0.660212	0.92722	0.69147	0.736334	0.994853	FALSE	FALSE	FALSE	FALSE	TRUE	TRUE	FALSE	TRUE
12	Pneumocystis jirovecii	-0.0886109	0.144451	-0.0628995	0.201887	0.333957	0.350998	0.0298345	0.267117	-0.265336	0.411543	-2.10828	0.755802	0.790951	0.680997	0.0359178	0.450419	0.91028	0.788155	0.352882	0.994853	FALSE	FALSE	FALSE	FALSE	TRUE	TRUE	TRUE	TRUE
13	Streptococcus pyogenes	0.402236	-0.403849	-0.00741239	-0.163196	0.312401	0.294379	0.0298869	0.228638	1.28757	-1.37187	-0.248015	-0.713774	0.198988	0.171231	0.804309	0.475977	0.774756	0.392028	0.985493	0.994853	FALSE	FALSE	FALSE	FALSE	FALSE	FALSE	TRUE	TRUE
14	Streptococcus pneumoniae	0.75552	-1.16866	0.00183216	0.172268	0.523336	0.497731	0.0533367	0.394922	1.44366	-2.34797	0.0343508	0.436207	0.149981	0.01959	0.972623	0.663031	0.686756	0.119863	0.985493	0.994853	FALSE	FALSE	FALSE	FALSE	FALSE	TRUE	TRUE	TRUE
15	Aggregatibacter segnis	0.184624	-0.256896	0.0360505	-0.156219	0.339629	0.339028	0.0338986	0.245054	0.543605	-0.757742	1.06348	-0.637488	0.587157	0.449259	0.288505	0.524341	0.872836	0.638136	0.748058	0.994853	FALSE	FALSE	FALSE	FALSE	TRUE	TRUE	FALSE	TRUE
16	Aggregatibacter aphrophilus	0.153679	-0.264291	0.0239541	-0.0445018	0.300431	0.292972	0.0299716	0.215281	0.511528	-0.9021	0.799228	-0.206714	0.609395	0.367799	0.424853	0.836387	0.872836	0.581618	0.859587	0.994853	FALSE	FALSE	FALSE	FALSE	TRUE	FALSE	TRUE	TRUE
17	Aggregatibacter actinomycetemcomitans	0.0500268	-0.00572767	0.0033716	-0.113674	0.272873	0.261319	0.0252582	0.212535	0.183334	-0.0219183	0.133486	-0.534847	0.854672	0.982529	0.893908	0.593191	0.91028	0.998506	0.985493	0.994853	FALSE	FALSE	FALSE	FALSE	TRUE	TRUE	TRUE	TRUE
18	Avibacterium paragallinarum	-0.158293	0.269058	-0.000757793	-0.0917389	0.254213	0.251007	0.0233787	0.188172	-0.622679	1.07191	-0.0324139	-0.487527	0.534016	0.284705	0.974166	0.626276	0.872836	0.495387	0.985493	0.994853	FALSE	FALSE	FALSE	FALSE	TRUE	TRUE	TRUE	TRUE
19	Mannheimia haemolytica	0.348015	-0.257256	-0.0254967	-0.18401	0.37188	0.343665	0.0307625	0.266478	0.935826	-0.748566	-0.828823	-0.690525	0.35019	0.454763	0.407929	0.490451	0.802129	0.638136	0.853211	0.994853	FALSE	FALSE	FALSE	FALSE	TRUE	TRUE	TRUE	TRUE
20	Pasteurella multocida	0.0737248	0.137973	-0.0375488	-0.170847	0.370432	0.346608	0.0304645	0.305446	0.199024	0.398067	-1.23254	-0.559336	0.842392	0.690892	0.218807	0.576391	0.91028	0.788155	0.736334	0.994853	FALSE	FALSE	FALSE	FALSE	TRUE	TRUE	TRUE	TRUE
21	Haemophilus influenzae	0.539055	-0.533214	-0.0901596	0.105789	0.622405	0.616561	0.0619786	0.570343	0.866084	-0.864819	-1.45469	0.185483	0.387205	0.387897	0.146904	0.852988	0.802129	0.592054	0.736334	0.994853	FALSE	FALSE	FALSE	FALSE	TRUE	TRUE	TRUE	TRUE
22	Haemophilus haemolyticus	0.952739	-1.44693	0.0513154	-0.0112834	0.507993	0.48976	0.0474983	0.350677	1.8755	-2.95437	1.08036	-0.032176	0.0617916	0.00340624	0.280934	0.974355	0.521714	0.0388462	0.748058	0.994853	FALSE	TRUE	FALSE	FALSE	FALSE	TRUE	TRUE	TRUE
23	Actinobacillus pleuropneumoniae	-0.215727	0.212182	-0.0287713	0.193443	0.272259	0.268043	0.0260207	0.204051	-0.792361	0.791599	-1.10571	0.948014	0.428838	0.429282	0.269827	0.343961	0.838648	0.622459	0.748058	0.994853	FALSE	FALSE	FALSE	FALSE	TRUE	TRUE	TRUE	TRUE
24	Moraxella catarrhalis	0.212968	-0.0104321	-0.21317	0.497271	0.694345	0.689979	0.0550961	0.559082	0.306717	-0.0151194	-3.86905	0.889442	0.759292	0.987948	0.000136705	0.374549	0.905027	0.998506	0.00594668	0.994853	FALSE	FALSE	TRUE	FALSE	TRUE	TRUE	TRUE	TRUE
25	Enterocloster bolteae	-0.0503591	0.0514847	-0.00118442	0.00345888	0.281125	0.275503	0.0263681	0.194997	-0.179134	0.186875	-0.0449186	0.0177381	0.857965	0.851897	0.964205	0.985861	0.91028	0.915001	0.985493	0.994853	FALSE	FALSE	FALSE	FALSE	TRUE	TRUE	TRUE	TRUE
26	Parabacteroides distasonis	-0.0342658	0.162062	0.00401482	-0.186566	0.304524	0.288658	0.0277165	0.207719	-0.112522	0.561431	0.144853	-0.898164	0.910492	0.574964	0.884934	0.36989	0.931915	0.709861	0.985493	0.994853	FALSE	FALSE	FALSE	FALSE	TRUE	TRUE	TRUE	TRUE
27	Tannerella sp. oral taxon HOT-286	-0.325524	-0.104375	0.0937604	0.285712	0.294843	0.304569	0.035603	0.216696	-1.10406	-0.342698	2.63349	1.3185	0.27054	0.732089	0.00893311	0.188443	0.802129	0.816561	0.155436	0.994853	FALSE	FALSE	FALSE	FALSE	TRUE	TRUE	TRUE	TRUE
28	Tannerella forsythia	0.182053	-0.278335	0.0405761	-0.142895	0.303051	0.28088	0.0330686	0.198143	0.600736	-0.990938	1.22703	-0.721168	0.548515	0.322593	0.220869	0.471423	0.872836	0.550306	0.736334	0.994853	FALSE	FALSE	FALSE	FALSE	FALSE	FALSE	FALSE	TRUE
29	Lautropia mirabilis	0.454115	-0.689846	0.0317004	-0.0460511	0.387952	0.393925	0.0347994	0.269813	1.17054	-1.75121	0.910945	-0.170678	0.242803	0.0810327	0.363128	0.864603	0.782366	0.245663	0.810054	0.994853	FALSE	FALSE	FALSE	FALSE	FALSE	FALSE	TRUE	TRUE
30	Quercus lobata	0.148724	-0.296346	-0.00179337	0.109986	0.350464	0.36123	0.0362882	0.245456	0.424363	-0.820382	-0.0494202	0.44809	0.671635	0.412714	0.960621	0.654444	0.872836	0.608579	0.985493	0.994853	FALSE	FALSE	FALSE	FALSE	TRUE	FALSE	TRUE	TRUE
31	Staphylococcus aureus	0.424878	-0.489145	0.00748611	-0.15371	0.432096	0.43856	0.0429816	0.321943	0.983294	-1.11534	0.17417	-0.477445	0.326334	0.265684	0.861861	0.633427	0.802129	0.481552	0.985493	0.994853	FALSE	FALSE	FALSE	FALSE	TRUE	TRUE	TRUE	TRUE
32	Prevotella denticola	-0.0950696	0.100571	0.0536924	-0.206724	0.316998	0.310686	0.038953	0.225385	-0.299906	0.323706	1.37839	-0.917207	0.764477	0.746408	0.169212	0.359844	0.905027	0.821994	0.736334	0.994853	FALSE	FALSE	FALSE	FALSE	TRUE	TRUE	FALSE	TRUE
33	Porphyromonas gingivalis	1.11811	-1.61602	0.0408159	-0.035152	0.48034	0.449206	0.0392892	0.302742	2.32774	-3.5975	1.03886	-0.116112	0.0206567	0.000381325	0.29979	0.907649	0.359427	0.0137073	0.748058	0.994853	FALSE	TRUE	FALSE	FALSE	TRUE	TRUE	TRUE	TRUE
34	Bacteroides ovatus	-0.0672676	0.0867505	0.0124946	-0.0685052	0.288805	0.281958	0.0300311	0.203627	-0.232917	0.307671	0.416055	-0.336425	0.816001	0.758567	0.677697	0.736809	0.91028	0.824942	0.921244	0.994853	FALSE	FALSE	FALSE	FALSE	TRUE	TRUE	TRUE	TRUE
35	Campylobacter concisus	0.588308	-0.926524	0.0514362	-0.0536105	0.407282	0.398064	0.0414095	0.292726	1.44447	-2.32757	1.24214	-0.183142	0.149753	0.020666	0.215252	0.854822	0.686756	0.119863	0.736334	0.994853	FALSE	FALSE	FALSE	FALSE	FALSE	TRUE	FALSE	TRUE
36	Parvimonas micra	-0.0482346	-0.19842	0.0236274	0.21791	0.294948	0.291879	0.0316797	0.20046	-0.163536	-0.679801	0.745823	1.08705	0.870218	0.497206	0.456416	0.277974	0.912156	0.655408	0.902459	0.994853	FALSE	FALSE	FALSE	FALSE	TRUE	FALSE	FALSE	TRUE
37	Granulicatella adiacens	0.344753	-0.506875	0.0230064	-0.057378	0.359678	0.357741	0.0376905	0.233906	0.958504	-1.41688	0.610402	-0.245304	0.338657	0.157659	0.542103	0.806405	0.802129	0.380968	0.91121	0.994853	FALSE	FALSE	FALSE	FALSE	TRUE	FALSE	TRUE	TRUE
38	Rothia mucilaginosa	1.21015	-1.56947	0.0121523	-0.135054	0.495735	0.479649	0.0438785	0.322661	2.44112	-3.27212	0.276955	-0.418563	0.0152774	0.00120479	0.782025	0.675864	0.332283	0.0174694	0.971945	0.994853	FALSE	TRUE	FALSE	FALSE	TRUE	TRUE	TRUE	TRUE
39	Leptotrichia sp. oral taxon 212	0.154652	-0.420208	0.0415066	0.0814435	0.333644	0.324237	0.0327196	0.230347	0.463525	-1.29599	1.26855	0.353569	0.643357	0.196073	0.205681	0.723935	0.872836	0.426458	0.736334	0.994853	FALSE	FALSE	FALSE	FALSE	TRUE	FALSE	FALSE	TRUE
40	Leptotrichia wadei	0.323053	-0.337649	-0.0263867	-0.0349714	0.360697	0.34932	0.0303854	0.26185	0.895635	-0.966588	-0.868399	-0.133555	0.371237	0.334606	0.385939	0.893853	0.802129	0.559821	0.839417	0.994853	FALSE	FALSE	FALSE	FALSE	TRUE	TRUE	TRUE	TRUE
41	Veillonella nakazawae	0.296215	-0.308974	-0.00970617	-0.0937835	0.43052	0.374921	0.0343974	0.271183	0.688041	-0.824104	-0.282178	-0.345831	0.492011	0.4106	0.778021	0.729736	0.872836	0.608579	0.971945	0.994853	FALSE	FALSE	FALSE	FALSE	TRUE	TRUE	TRUE	TRUE
42	Veillonella atypica	0.383523	-0.638706	0.0248137	0.0374059	0.437279	0.419087	0.0465376	0.303716	0.877068	-1.52404	0.533196	0.123161	0.381221	0.128656	0.594332	0.90207	0.802129	0.356851	0.91121	0.994853	FALSE	FALSE	FALSE	FALSE	TRUE	FALSE	TRUE	TRUE
43	Saccharomyces cerevisiae	-0.147743	0.20873	-0.0161232	0.0300032	0.317779	0.294679	0.0315857	0.218027	-0.464923	0.70833	-0.51046	0.137612	0.642357	0.479345	0.610142	0.890648	0.872836	0.655408	0.91121	0.994853	FALSE	FALSE	FALSE	FALSE	TRUE	TRUE	TRUE	TRUE
44	Streptococcus mitis	1.7502	-2.03857	-0.00685708	-0.381496	0.61377	0.5761	0.0522601	0.394032	2.85155	-3.53858	-0.13121	-0.968188	0.00468294	0.000472664	0.895705	0.333808	0.203708	0.0137073	0.985493	0.994853	FALSE	TRUE	FALSE	FALSE	TRUE	TRUE	TRUE	TRUE
45	Streptococcus parasanguinis	0.477846	-0.459637	0.016477	-0.31867	0.372237	0.348952	0.0352753	0.237165	1.28371	-1.31719	0.467098	-1.34366	0.200331	0.188879	0.640803	0.180174	0.774756	0.421347	0.91121	0.994853	FALSE	FALSE	FALSE	FALSE	FALSE	FALSE	TRUE	TRUE
46	Capnocytophaga gingivalis	0.478382	-0.906339	0.0743421	0.015096	0.442722	0.408203	0.0353741	0.261055	1.08055	-2.22031	2.1016	0.057827	0.280852	0.0272188	0.0365051	0.953929	0.802129	0.131557	0.352882	0.994853	FALSE	FALSE	FALSE	FALSE	TRUE	TRUE	TRUE	TRUE
47	Fusobacterium pseudoperiodonticum	0.461028	-0.818586	0.0471443	0.0436142	0.377166	0.361725	0.0382399	0.26325	1.22235	-2.26301	1.23286	0.165676	0.222631	0.024421	0.21869	0.868535	0.774756	0.124978	0.736334	0.994853	FALSE	FALSE	FALSE	FALSE	FALSE	TRUE	FALSE	TRUE
48	Prevotella nanceiensis	0.179828	-0.321969	0.0184641	0.0068861	0.290658	0.277071	0.02946	0.192879	0.618695	-1.16204	0.626754	0.0357017	0.536633	0.246233	0.531344	0.971546	0.872836	0.476051	0.91121	0.994853	FALSE	FALSE	FALSE	FALSE	FALSE	FALSE	TRUE	TRUE
49	Prevotella ruminicola	-0.1819	0.22489	0.00150364	-0.00416292	0.255246	0.251519	0.0264134	0.170522	-0.712648	0.894128	0.056927	-0.0244128	0.476672	0.372041	0.954645	0.980541	0.872836	0.581618	0.985493	0.994853	FALSE	FALSE	FALSE	FALSE	TRUE	FALSE	TRUE	TRUE
50	Neisseria flavescens	0.120402	-0.216201	-0.0294125	0.1687	0.325709	0.338762	0.0290209	0.234528	0.36966	-0.63821	-1.0135	0.719315	0.711922	0.523872	0.311721	0.472562	0.897641	0.680252	0.753326	0.994853	FALSE	FALSE	FALSE	FALSE	TRUE	TRUE	TRUE	TRUE
51	Campylobacter showae	-0.127049	-0.214022	0.0583339	0.230999	0.29865	0.310226	0.0345014	0.2267	-0.425411	-0.689893	1.69077	1.01896	0.670872	0.490848	0.0920222	0.309123	0.872836	0.655408	0.615841	0.994853	FALSE	FALSE	FALSE	FALSE	TRUE	TRUE	FALSE	TRUE
52	Gemella sanguinis	0.236692	-0.480286	0.0454649	0.00178118	0.278688	0.275034	0.0334823	0.195862	0.849307	-1.74628	1.35788	0.00909404	0.396454	0.0818875	0.175623	0.992751	0.802129	0.245663	0.736334	0.994853	FALSE	FALSE	FALSE	FALSE	FALSE	FALSE	FALSE	TRUE
53	Streptococcus salivarius	0.846252	-1.03715	0.00132117	-0.148829	0.419422	0.387637	0.0367277	0.252322	2.01766	-2.67556	0.0359719	-0.58984	0.0446048	0.00791111	0.971331	0.555786	0.521714	0.0625697	0.985493	0.994853	FALSE	FALSE	FALSE	FALSE	TRUE	TRUE	TRUE	TRUE
54	Capnocytophaga leadbetteri	0.115114	-0.525849	0.0940624	0.0695932	0.380552	0.373466	0.0373423	0.261332	0.302493	-1.40802	2.51893	0.266302	0.762507	0.160262	0.012343	0.790208	0.905027	0.380968	0.178974	0.994853	FALSE	FALSE	FALSE	FALSE	TRUE	FALSE	TRUE	TRUE
55	Capnocytophaga sputigena	0.437098	-0.669207	0.0463134	-0.102951	0.414037	0.372028	0.038374	0.257866	1.0557	-1.79881	1.20689	-0.399243	0.29204	0.073153	0.228518	0.690026	0.802129	0.235715	0.736334	0.994853	FALSE	FALSE	FALSE	FALSE	TRUE	FALSE	FALSE	TRUE
56	Fusobacterium nucleatum	0.127441	-0.47386	0.0755787	0.0575039	0.435048	0.423239	0.043866	0.281532	0.292936	-1.1196	1.72294	0.204254	0.769793	0.263867	0.0860312	0.838307	0.905027	0.481552	0.615841	0.994853	FALSE	FALSE	FALSE	FALSE	TRUE	FALSE	FALSE	TRUE
57	Prevotella sp. oral taxon 299	1.15528	-1.40252	0.0312966	-0.332677	0.454274	0.406125	0.0332201	0.289068	2.54314	-3.45342	0.9421	-1.15086	0.0115382	0.000641449	0.346974	0.250796	0.332283	0.0139515	0.810054	0.994853	FALSE	TRUE	FALSE	FALSE	TRUE	TRUE	TRUE	TRUE
58	Prevotella scopos	-0.000608147	-0.160914	0.0628179	-0.071356	0.284176	0.290396	0.0365902	0.199661	-0.00214004	-0.55412	1.7168	-0.357386	0.998294	0.57995	0.0871503	0.721079	0.998294	0.709861	0.615841	0.994853	FALSE	FALSE	FALSE	FALSE	TRUE	FALSE	FALSE	TRUE
59	Prevotella intermedia	0.0769887	-0.455669	0.13474	-0.120864	0.387357	0.380205	0.043673	0.256181	0.198754	-1.19848	3.0852	-0.471794	0.842603	0.231768	0.00224304	0.637451	0.91028	0.458269	0.0487861	0.994853	FALSE	FALSE	TRUE	FALSE	TRUE	FALSE	TRUE	TRUE
60	Porphyromonas crevioricanis	0.53101	-0.758943	0.00308257	0.0275265	0.359626	0.308659	0.0249242	0.203241	1.47656	-2.45884	0.123678	0.135438	0.140946	0.0145595	0.901661	0.892366	0.686756	0.0974366	0.985493	0.994853	FALSE	FALSE	FALSE	FALSE	FALSE	TRUE	TRUE	TRUE
61	Bacteroides fragilis	0.304842	-0.539451	0.0210198	0.060595	0.356873	0.360178	0.0346628	0.251057	0.854202	-1.49774	0.606409	0.241359	0.393742	0.135357	0.544747	0.809458	0.802129	0.356851	0.91121	0.994853	FALSE	FALSE	FALSE	FALSE	TRUE	FALSE	TRUE	TRUE
62	Haemophilus parainfluenzae	0.604876	-0.845844	0.0608054	-0.223259	0.493092	0.450849	0.0461846	0.31938	1.2267	-1.87612	1.31657	-0.699039	0.220993	0.0617064	0.189086	0.485123	0.774756	0.228491	0.736334	0.994853	FALSE	FALSE	FALSE	FALSE	TRUE	FALSE	FALSE	TRUE
63	Neisseria subflava	0.961484	-1.0079	-0.0325	-0.245228	0.527637	0.496024	0.0395463	0.347932	1.82224	-2.03197	-0.821823	-0.704815	0.0695118	0.0431252	0.411895	0.481526	0.521714	0.170541	0.853211	0.994853	FALSE	FALSE	FALSE	FALSE	FALSE	TRUE	TRUE	TRUE
64	Gemella morbillorum	0.566217	-0.861372	0.0310147	-0.0157627	0.313454	0.303365	0.0299261	0.204303	1.80638	-2.83939	1.03638	-0.0771533	0.0719605	0.00485987	0.300943	0.938558	0.521714	0.042783	0.748058	0.994853	FALSE	TRUE	FALSE	FALSE	FALSE	TRUE	FALSE	TRUE
65	Neisseria elongata	0.178031	-0.384288	0.0422193	-0.00733643	0.341133	0.340201	0.0339368	0.234433	0.521881	-1.12959	1.24406	-0.0312943	0.602176	0.259639	0.214545	0.975058	0.872836	0.481552	0.736334	0.994853	FALSE	FALSE	FALSE	FALSE	TRUE	FALSE	FALSE	TRUE
66	Moraxella nonliquefaciens	0.177337	-0.46584	-0.00703812	0.299037	0.3637	0.378755	0.0340685	0.248374	0.48759	-1.22992	-0.206587	1.20398	0.626231	0.219784	0.836486	0.229641	0.872836	0.44468	0.985493	0.994853	FALSE	FALSE	FALSE	FALSE	TRUE	FALSE	TRUE	TRUE
67	Gemella haemolysans	0.770871	-1.40997	0.0663535	0.191094	0.444926	0.422982	0.0418232	0.276168	1.73258	-3.33339	1.58652	0.691948	0.0842994	0.000976568	0.113778	0.489558	0.52386	0.0169923	0.659912	0.994853	FALSE	TRUE	FALSE	FALSE	FALSE	TRUE	FALSE	TRUE
68	Haemophilus parahaemolyticus	0.362894	-0.727718	0.0186832	0.211431	0.399525	0.399186	0.0353723	0.256749	0.908312	-1.82301	0.528186	0.823491	0.364515	0.0693962	0.597799	0.410947	0.802129	0.23221	0.91121	0.994853	FALSE	FALSE	FALSE	FALSE	TRUE	FALSE	TRUE	TRUE
69	Streptobacillus moniliformis	0.579564	-0.646688	-0.00967567	-0.146877	0.367382	0.34807	0.0291033	0.226067	1.57755	-1.85792	-0.332459	-0.649705	0.115826	0.0642562	0.739797	0.516429	0.629806	0.228491	0.960633	0.994853	FALSE	FALSE	FALSE	FALSE	FALSE	FALSE	TRUE	TRUE
70	Aureobasidium pullulans	-0.134735	0.0197443	0.00276024	0.172194	0.311729	0.316058	0.0329903	0.231611	-0.432219	0.0624705	0.083668	0.743461	0.665924	0.950234	0.933382	0.457842	0.872836	0.996028	0.985493	0.994853	FALSE	FALSE	FALSE	FALSE	TRUE	TRUE	TRUE	TRUE
71	Selenomonas sputigena	-0.115299	0.00333887	0.0160999	0.105494	0.281301	0.278294	0.0294782	0.18577	-0.409878	0.0119976	0.546163	0.567873	0.682217	0.990436	0.5854	0.570588	0.872836	0.998506	0.91121	0.994853	FALSE	FALSE	FALSE	FALSE	TRUE	TRUE	FALSE	TRUE
72	Prevotella jejuni	0.0926561	-0.469721	0.0948969	0.0328695	0.356609	0.370478	0.0442043	0.250037	0.259826	-1.26788	2.14678	0.131458	0.795194	0.205922	0.032692	0.895509	0.91028	0.426552	0.352882	0.994853	FALSE	FALSE	FALSE	FALSE	TRUE	FALSE	TRUE	TRUE
73	Prevotella fusca	0.136178	-0.253603	0.0531588	-0.147397	0.282682	0.285022	0.0290993	0.19518	0.481737	-0.889767	1.82681	-0.755185	0.630379	0.374375	0.0688204	0.450789	0.872836	0.581618	0.598738	0.994853	FALSE	FALSE	FALSE	FALSE	TRUE	FALSE	FALSE	TRUE
74	Moraxella bovoculi	-0.0181656	-0.0479592	-0.0205979	0.154691	0.324936	0.332384	0.0308712	0.221408	-0.0559052	-0.144288	-0.667222	0.69867	0.955458	0.885379	0.505194	0.485353	0.966568	0.939366	0.91121	0.994853	FALSE	FALSE	FALSE	FALSE	TRUE	TRUE	TRUE	TRUE
75	Streptococcus pseudopneumoniae	0.355189	-0.446991	-0.0138541	-0.00134141	0.299867	0.297532	0.0304389	0.207746	1.18449	-1.50233	-0.455143	-0.00645697	0.23725	0.134167	0.649368	0.994853	0.782366	0.356851	0.91121	0.994853	FALSE	FALSE	FALSE	FALSE	FALSE	FALSE	TRUE	TRUE
76	Neisseria mucosa	0.653575	-1.12213	0.0605315	0.0476205	0.503568	0.493408	0.0516133	0.307948	1.29789	-2.27424	1.17279	0.154638	0.195422	0.0237276	0.241902	0.877221	0.774756	0.124978	0.748058	0.994853	FALSE	FALSE	FALSE	FALSE	FALSE	TRUE	FALSE	TRUE
77	Neisseria lactamica	0.404911	-0.475791	-0.03607	0.0410868	0.373024	0.372342	0.0394518	0.265386	1.08548	-1.27783	-0.914281	0.154819	0.278666	0.202394	0.361376	0.877079	0.802129	0.426552	0.810054	0.994853	FALSE	FALSE	FALSE	FALSE	TRUE	FALSE	TRUE	TRUE
78	Neisseria cinerea	0.471309	-0.888049	0.0293422	0.18743	0.452594	0.432605	0.0433092	0.271957	1.04135	-2.05279	0.677504	0.689191	0.298635	0.0410458	0.49866	0.491288	0.802129	0.170047	0.91121	0.994853	FALSE	FALSE	FALSE	FALSE	TRUE	TRUE	TRUE	TRUE
79	Prevotella copri	-0.192048	0.000584272	0.00923938	0.268237	0.313121	0.311756	0.0317276	0.223178	-0.613334	0.00187413	0.29121	1.2019	0.540166	0.998506	0.771112	0.230445	0.872836	0.998506	0.971945	0.994853	FALSE	FALSE	FALSE	FALSE	TRUE	TRUE	TRUE	TRUE
80	Rhinovirus C	0.356182	-0.309777	-0.00692276	-0.206651	0.569501	0.570337	0.0523516	0.413173	0.625429	-0.543147	-0.132236	-0.500155	0.532212	0.587471	0.894895	0.617369	0.872836	0.709861	0.985493	0.994853	FALSE	FALSE	FALSE	FALSE	TRUE	TRUE	TRUE	TRUE
81	Human rhinovirus sp.	-0.250235	0.160499	-0.0225032	0.292912	0.381808	0.348897	0.0336748	0.262212	-0.655395	0.460019	-0.66825	1.11708	0.512765	0.645869	0.504539	0.264942	0.872836	0.759332	0.91121	0.994853	FALSE	FALSE	FALSE	FALSE	TRUE	TRUE	TRUE	TRUE
82	Rhinovirus A	-0.254103	0.265059	-0.0367554	0.224073	0.600579	0.521705	0.0570089	0.432095	-0.423096	0.508063	-0.644731	0.518575	0.672558	0.611819	0.519643	0.604477	0.872836	0.729154	0.91121	0.994853	FALSE	FALSE	FALSE	FALSE	TRUE	TRUE	TRUE	TRUE
83	Streptococcus oralis	0.829094	-0.878133	-0.0215875	-0.229204	0.47069	0.422827	0.0387621	0.285908	1.76145	-2.07681	-0.556922	-0.80167	0.0792824	0.0387543	0.578037	0.423441	0.52386	0.168581	0.91121	0.994853	FALSE	FALSE	FALSE	FALSE	FALSE	TRUE	TRUE	TRUE
84	Fusobacterium hwasookii	0.253627	-0.362008	-0.0151321	0.0689414	0.341066	0.329917	0.0276114	0.216417	0.743631	-1.09727	-0.54804	0.318558	0.457739	0.273491	0.584112	0.750305	0.865724	0.485585	0.91121	0.994853	FALSE	FALSE	FALSE	FALSE	TRUE	FALSE	TRUE	TRUE
85	Streptococcus agalactiae	0.588035	-0.696946	-0.0037911	-0.121153	0.359806	0.3771	0.0436974	0.244987	1.63431	-1.84818	-0.0867581	-0.494527	0.103345	0.0656584	0.930927	0.621331	0.599404	0.228491	0.985493	0.994853	FALSE	FALSE	FALSE	FALSE	FALSE	FALSE	TRUE	TRUE
86	Capnocytophaga ochracea	0.05643	-0.10272	0.00946799	-0.0255625	0.289752	0.264046	0.0251652	0.179663	0.194753	-0.389022	0.376233	-0.14228	0.845731	0.697563	0.707036	0.886964	0.91028	0.788155	0.946341	0.994853	FALSE	FALSE	FALSE	FALSE	TRUE	FALSE	FALSE	TRUE
87	RSV	-2.14415	3.46024	-0.379223	0.770437	0.557198	0.57266	0.0496866	0.5815	-3.84809	6.0424	-7.6323	1.32491	0.000148286	4.9601e-09	3.87555e-13	0.186308	0.0129008	4.31528e-07	3.37173e-11	0.994853	TRUE	TRUE	TRUE	FALSE	TRUE	TRUE	TRUE	TRUE
