# Supplementary material for: Host–microbiome archetypes differentiate infection from pathogen carriage in the human lower airway
Source: Nat Commun. 2026 Apr 13;17:5149. doi: 10.1038/s41467-026-71863-5 (PMC13250161; doi:10.1038/s41467-026-71863-5)
Supplement: Supplementary file 4 — Supplementary Data 2 [file 41467_2026_71863_MOESM4_ESM.xlsx]

## Sheet: Sheet 1
SuppData2
	taxon	lfc_(Intercept)	lfc_infection_derivedInfection	lfc_genderMale	lfc_age	se_(Intercept)	se_infection_derivedInfection	se_genderMale	se_age	W_(Intercept)	W_infection_derivedInfection	W_genderMale	W_age	p_(Intercept)	p_infection_derivedInfection	p_genderMale	p_age	q_(Intercept)	q_infection_derivedInfection	q_genderMale	q_age	diff_(Intercept)	diff_infection_derivedInfection	diff_genderMale	diff_age	passed_ss_(Intercept)	passed_ss_infection_derivedInfection	passed_ss_genderMale	passed_ss_age
1	N. meningitidis | Capsule	0.201193	0.0552796	-0.174832	-0.0133202	0.304819	0.304912	0.261878	0.0287254	0.660042	0.181297	-0.667611	-0.46371	0.510044	0.856332	0.505209	0.643398	0.991143	0.930796	0.991404	0.893608	FALSE	FALSE	FALSE	FALSE	TRUE	TRUE	TRUE	TRUE
2	P. aeruginosa | HSI-1 T6SS	0.118574	-0.252154	0.185331	0.0245205	0.327143	0.323769	0.269348	0.0330246	0.362455	-0.778808	0.688072	0.74249	0.717424	0.437082	0.492265	0.458727	0.991143	0.848505	0.991404	0.716761	FALSE	FALSE	FALSE	FALSE	TRUE	TRUE	TRUE	TRUE
3	B. pseudomallei | Flagella	0.0518631	0.229285	-0.205579	0.0032829	0.299528	0.297912	0.272586	0.0294708	0.173149	0.769642	-0.754178	0.111395	0.862722	0.442489	0.451696	0.911423	0.991143	0.848505	0.991404	0.949399	FALSE	FALSE	FALSE	FALSE	TRUE	TRUE	TRUE	TRUE
4	S. pneumoniae | Autolysin	0.0243062	0.162814	-0.0245141	-0.00920728	0.288365	0.291529	0.242865	0.0308225	0.0842897	0.558483	-0.100937	-0.298719	0.932917	0.577186	0.919709	0.765488	0.991143	0.848505	0.991404	0.929163	FALSE	FALSE	FALSE	FALSE	TRUE	TRUE	TRUE	TRUE
5	S. pneumoniae | PsaA (Pneumococcal surface antigen A)	0.212944	-0.136952	0.0150811	-0.00688383	0.311432	0.316576	0.269477	0.0327269	0.683757	-0.432605	0.0559642	-0.210342	0.49498	0.665803	0.95543	0.833631	0.991143	0.848505	0.991404	0.929163	FALSE	FALSE	FALSE	FALSE	TRUE	TRUE	TRUE	TRUE
6	S. pneumoniae | CbpA/PspC	-0.0211429	0.156148	0.0457901	-0.00563022	0.261474	0.279234	0.229653	0.0307304	-0.0808607	0.5592	0.199388	-0.183213	0.93564	0.576698	0.842177	0.85483	0.991143	0.848505	0.991404	0.929163	FALSE	FALSE	FALSE	FALSE	TRUE	TRUE	TRUE	TRUE
7	S. pneumoniae | Pneumolysin	0.16445	-0.0300741	-0.089538	0.00626903	0.293599	0.291711	0.236874	0.032727	0.56012	-0.103096	-0.377998	0.191555	0.576072	0.917998	0.705863	0.8483	0.991143	0.956248	0.991404	0.929163	FALSE	FALSE	FALSE	FALSE	TRUE	TRUE	TRUE	TRUE
8	E. coli | Enterobactin	0.110468	0.149648	-0.215081	0.00523891	0.328894	0.313081	0.269554	0.0282581	0.335876	0.477984	-0.797913	0.185395	0.737343	0.633223	0.425938	0.853121	0.991143	0.848505	0.991404	0.929163	FALSE	FALSE	FALSE	FALSE	TRUE	TRUE	TRUE	TRUE
9	H. influenzae | P2 protein	-0.232514	0.473803	0.179514	-0.0453174	0.287851	0.312517	0.281007	0.0292068	-0.807756	1.51608	0.638822	-1.5516	0.420263	0.131196	0.523724	0.122457	0.991143	0.806105	0.991404	0.421587	FALSE	FALSE	FALSE	FALSE	TRUE	TRUE	TRUE	TRUE
10	H. influenzae | HMW1/HMW2 (High-molecular-weight proteins)	-0.443882	0.841188	0.0987405	-0.048493	0.312598	0.328383	0.336407	0.0318448	-1.41998	2.56161	0.293515	-1.52279	0.157288	0.0112116	0.769456	0.12951	0.991143	0.280289	0.991404	0.421587	FALSE	FALSE	FALSE	FALSE	TRUE	TRUE	TRUE	TRUE
11	H. influenzae | LOS	-0.0407	0.307705	0.104105	-0.0561203	0.397193	0.405073	0.379244	0.0373748	-0.102469	0.759629	0.274507	-1.50156	0.918495	0.448438	0.784	0.134908	0.991143	0.848505	0.991404	0.421587	FALSE	FALSE	FALSE	FALSE	TRUE	TRUE	TRUE	TRUE
12	H. influenzae | P5 protein	0.0581805	0.239873	0.0199656	-0.0561265	0.339148	0.34714	0.333242	0.0318492	0.171549	0.690999	0.0599132	-1.76226	0.863979	0.490428	0.952289	0.0796681	0.991143	0.848505	0.991404	0.421587	FALSE	FALSE	FALSE	FALSE	TRUE	TRUE	TRUE	TRUE
13	F. tularensis | EF-Tu	-0.145654	0.489738	0.0202347	-0.0471542	0.339325	0.350991	0.303601	0.0361435	-0.429245	1.3953	0.066649	-1.30464	0.668242	0.164588	0.946933	0.193627	0.991143	0.806105	0.991404	0.490839	FALSE	FALSE	FALSE	FALSE	TRUE	TRUE	TRUE	TRUE
14	H. influenzae | HxuABC	-0.18213	0.556892	0.0381497	-0.0563948	0.26691	0.282258	0.264409	0.0264794	-0.682366	1.97299	0.144283	-2.12976	0.495857	0.0499781	0.885433	0.0345064	0.991143	0.624727	0.991404	0.421587	FALSE	FALSE	FALSE	FALSE	TRUE	FALSE	TRUE	FALSE
15	H. influenzae | OapA	-0.147957	0.455132	0.0117392	-0.0340375	0.251185	0.263371	0.232453	0.026249	-0.589036	1.7281	0.0505015	-1.29671	0.556552	0.0856298	0.959777	0.196336	0.991143	0.713581	0.991404	0.490839	FALSE	FALSE	FALSE	FALSE	TRUE	FALSE	TRUE	FALSE
16	H. influenzae | HitABC	-0.120179	0.356432	0.139623	-0.0467615	0.258593	0.273104	0.246422	0.0265969	-0.464741	1.30512	0.566601	-1.75816	0.64266	0.193465	0.571669	0.0803653	0.991143	0.806105	0.991404	0.421587	FALSE	FALSE	FALSE	FALSE	TRUE	TRUE	TRUE	FALSE
17	P. aeruginosa | Flagella	0.318575	-0.288974	-0.283768	0.0662652	0.386677	0.364207	0.289704	0.0375678	0.823879	-0.793433	-0.979509	1.76388	0.411063	0.428537	0.328601	0.0793934	0.991143	0.848505	0.991404	0.421587	FALSE	FALSE	FALSE	FALSE	TRUE	TRUE	TRUE	FALSE
18	P. aeruginosa | Alginate (Mucoid exopolysaccharide)	0.0857388	-0.112612	-0.117875	0.0690758	0.354258	0.343758	0.277548	0.0427389	0.242024	-0.327589	-0.424702	1.61623	0.809029	0.743591	0.671545	0.10774	0.991143	0.848505	0.991404	0.421587	FALSE	FALSE	FALSE	FALSE	TRUE	TRUE	TRUE	FALSE
19	E. coli | ECP (E. coli common pilus)	-0.158659	0.276024	0.193834	-0.0205149	0.278282	0.290227	0.250085	0.0297156	-0.570138	0.951062	0.775072	-0.690374	0.569272	0.342807	0.439281	0.49082	0.991143	0.848505	0.991404	0.721793	FALSE	FALSE	FALSE	FALSE	TRUE	TRUE	TRUE	TRUE
20	K. pneumoniae | Enterobactin	0.443692	-0.288259	-0.0986514	-0.0286365	0.352951	0.327719	0.258084	0.0278985	1.25709	-0.879591	-0.382245	-1.02645	0.210296	0.380216	0.702716	0.30601	0.991143	0.848505	0.991404	0.588482	FALSE	FALSE	FALSE	FALSE	FALSE	FALSE	TRUE	TRUE
21	P. aeruginosa | T3SS	0.123685	-0.0991301	-0.0240744	0.0274247	0.312002	0.306435	0.243867	0.0328128	0.396425	-0.323494	-0.0987195	0.835795	0.692246	0.746684	0.921467	0.404342	0.991143	0.848505	0.991404	0.716761	FALSE	FALSE	FALSE	FALSE	TRUE	TRUE	TRUE	TRUE
22	P. aeruginosa | Type IV pili	0.226687	-0.275484	-0.042761	0.0420193	0.330466	0.332623	0.262315	0.0354181	0.68596	-0.828217	-0.163014	1.18638	0.493592	0.408609	0.870684	0.236986	0.991143	0.848505	0.991404	0.493722	FALSE	FALSE	FALSE	FALSE	TRUE	TRUE	TRUE	FALSE
23	N. meningitidis | MsrAB (Methionine sulphoxide reductase)	-0.00316316	0.0978702	0.0692013	-0.00136616	0.284552	0.293423	0.236091	0.0289907	-0.0111163	0.333546	0.293113	-0.047124	0.991143	0.739098	0.769762	0.962465	0.991143	0.848505	0.991404	0.962465	FALSE	FALSE	FALSE	FALSE	TRUE	TRUE	TRUE	TRUE
24	P. aeruginosa | Pyoverdine	-0.0199603	-0.162856	0.212744	0.0477719	0.33619	0.344128	0.266225	0.0398578	-0.059372	-0.473243	0.799114	1.19856	0.95272	0.636595	0.425244	0.232224	0.991143	0.848505	0.991404	0.493722	FALSE	FALSE	FALSE	FALSE	TRUE	TRUE	TRUE	FALSE
25	N. meningitidis | MtrCDE (Multiple transferable resistance system)	0.163677	-0.00648113	-0.00260684	-0.0210609	0.281712	0.290108	0.241648	0.0270206	0.581006	-0.0223404	-0.0107878	-0.779439	0.56194	0.9822	0.991404	0.436712	0.991143	0.9822	0.991404	0.716761	FALSE	FALSE	FALSE	FALSE	TRUE	TRUE	TRUE	TRUE
