# Supplementary material for: Host–microbiome archetypes differentiate infection from pathogen carriage in the human lower airway
Source: Nat Commun. 2026 Apr 13;17:5149. doi: 10.1038/s41467-026-71863-5 (PMC13250161; doi:10.1038/s41467-026-71863-5)
Supplement: Supplementary file 5 — Supplementary Data 3 [file 41467_2026_71863_MOESM5_ESM.xlsx]

## Sheet: Sheet 1
SuppData3
feature	metadata	value	coef	stderr	N	N.not.0	pval	qval
FAO.PWY..fatty.acid..beta..oxidation.I..generic.	infection_derived	LRTI	-0.198278	0.0531038	277	6	0.000229255	0.0343883
PWY.5136..fatty.acid..beta..oxidation.II..plant.peroxisome.	infection_derived	LRTI	-0.279688	0.0788787	277	5	0.000459918	0.0344938
PWY.4984..urea.cycle	infection_derived	LRTI	-0.102868	0.0319464	277	4	0.00143568	0.0358921
PWY.5138..fatty.acid..beta..oxidation.IV..unsaturated..even.number.	infection_derived	LRTI	-0.172869	0.0519527	277	5	0.000995977	0.0358921
PWY.5188..tetrapyrrole.biosynthesis.I..from.glutamate.	infection_derived	LRTI	-0.153897	0.0477717	277	6	0.00142852	0.0358921
PWY.8187..L.arginine.degradation.XIII..reductive.Stickland.reaction.	infection_derived	LRTI	-0.135518	0.0417827	277	4	0.00132695	0.0358921
CITRULBIO.PWY..L.citrulline.biosynthesis	infection_derived	LRTI	-0.16454	0.0521233	277	5	0.00177281	0.0379887
HEME.BIOSYNTHESIS.II.1..heme.b.biosynthesis.V..aerobic.	infection_derived	LRTI	-0.101684	0.0343883	277	4	0.00337693	0.0562822
HEME.BIOSYNTHESIS.II..heme.b.biosynthesis.I..aerobic.	infection_derived	LRTI	-0.101684	0.0343883	277	4	0.00337693	0.0562822
PWY.7383..anaerobic.energy.metabolism..invertebrates..cytosol.	infection_derived	LRTI	-0.0757145	0.0269736	277	3	0.00535845	0.0803768
PWY.4041...gamma..glutamyl.cycle	infection_derived	LRTI	-0.171574	0.0621095	277	9	0.00612399	0.0835089
P221.PWY..octane.oxidation	infection_derived	LRTI	-0.0782928	0.0296228	277	3	0.00868895	0.0930959
PWY.6803..phosphatidylcholine.acyl.editing	infection_derived	LRTI	-0.168161	0.0630396	277	8	0.00809399	0.0930959
SO4ASSIM.PWY..assimilatory.sulfate.reduction.I	infection_derived	LRTI	-0.104567	0.0390738	277	3	0.00789477	0.0930959
HEMESYN2.PWY..heme.b.biosynthesis.II..oxygen.independent.	infection_derived	LRTI	-0.0804251	0.0308276	277	3	0.00958139	0.0958139
PANTO.PWY..phosphopantothenate.biosynthesis.I	infection_derived	LRTI	-0.0801678	0.032843	277	4	0.0152801	0.134825
PWY.5686..UMP.biosynthesis.I	infection_derived	LRTI	-0.153456	0.0623132	277	8	0.0144041	0.134825
PWY0.1296..purine.ribonucleosides.degradation	infection_derived	LRTI	-0.123812	0.0522551	277	4	0.0185091	0.154242
DTDPRHAMSYN.PWY..dTDP..beta..L.rhamnose.biosynthesis	infection_derived	LRTI	-0.10493	0.0475402	277	3	0.0281263	0.22205
UDPNAGSYN.PWY..UDP.N.acetyl.D.glucosamine.biosynthesis.I	infection_derived	LRTI	-0.165112	0.0832209	277	12	0.0482473	0.361855
BRANCHED.CHAIN.AA.SYN.PWY..superpathway.of.branched.chain.amino.acid.biosynthesis	infection_derived	LRTI	-0.175997	0.0905651	277	10	0.0529982	0.378558
LIPASYN.PWY..phospholipases	infection_derived	LRTI	0.365698	0.20885	277	11	0.0810596	0.486358
PANTOSYN.PWY..superpathway.of.coenzyme.A.biosynthesis.I..bacteria.	infection_derived	LRTI	-0.0571874	0.0324912	277	3	0.079504	0.486358
PWY.5855..ubiquinol.7.biosynthesis..early.decarboxylation.	infection_derived	LRTI	-0.0274064	0.0155774	277	3	0.0796262	0.486358
PWY.6123..inosine.5..phosphate.biosynthesis.I	infection_derived	LRTI	-0.128143	0.07212	277	9	0.0767059	0.486358
UNMAPPED	infection_derived	LRTI	-0.24012	0.139195	277	57	0.0856391	0.492146
P41.PWY..pyruvate.fermentation.to.acetate.and..S..lactate.I	infection_derived	LRTI	0.274692	0.160736	277	17	0.0885863	0.492146
HISTSYN.PWY..L.histidine.biosynthesis	infection_derived	LRTI	-0.154841	0.0920965	277	9	0.093841	0.50272
PWY.1269..CMP.3.deoxy.D.manno.octulosonate.biosynthesis	infection_derived	LRTI	-0.158028	0.0973213	277	10	0.105569	0.508234
PWY.5667..CDP.diacylglycerol.biosynthesis.I	infection_derived	LRTI	-0.177023	0.108584	277	12	0.104186	0.508234
PWY.5973..cis.vaccenate.biosynthesis	infection_derived	LRTI	-0.1619	0.100524	277	7	0.108423	0.508234
PWY0.1319..CDP.diacylglycerol.biosynthesis.II	infection_derived	LRTI	-0.177023	0.108584	277	12	0.104186	0.508234
PWY.7790..UMP.biosynthesis.II	infection_derived	LRTI	-0.0561296	0.0379538	277	5	0.140313	0.61903
PWY.7791..UMP.biosynthesis.III	infection_derived	LRTI	-0.0561296	0.0379538	277	5	0.140313	0.61903
COMPLETE.ARO.PWY..superpathway.of.aromatic.amino.acid.biosynthesis	infection_derived	LRTI	-0.130588	0.0933201	277	9	0.162834	0.69786
PWY.5100..pyruvate.fermentation.to.acetate.and.lactate.II	infection_derived	LRTI	0.204713	0.148097	277	13	0.168004	0.700016
PWY4FS.7..phosphatidylglycerol.biosynthesis.I..plastidic.	infection_derived	LRTI	-0.150134	0.113976	277	11	0.188856	0.745483
PWY4FS.8..phosphatidylglycerol.biosynthesis.II..non.plastidic.	infection_derived	LRTI	-0.150134	0.113976	277	11	0.188856	0.745483
PWY.841..superpathway.of.purine.nucleotides.de.novo.biosynthesis.I	infection_derived	LRTI	-0.0523311	0.04024	277	5	0.194527	0.748182
COA.PWY..coenzyme.A.biosynthesis.I..prokaryotic.	infection_derived	LRTI	-0.101881	0.0823473	277	12	0.217064	0.791127
PHOSLIPSYN.PWY..superpathway.of.phospholipid.biosynthesis.I..bacteria.	infection_derived	LRTI	-0.126391	0.10187	277	11	0.215773	0.791127
PWY.7199..pyrimidine.deoxyribonucleosides.salvage	infection_derived	LRTI	0.0940279	0.0768489	277	5	0.222172	0.791127
PWY.7234..inosine.5..phosphate.biosynthesis.III	infection_derived	LRTI	-0.0611425	0.0504734	277	5	0.22679	0.791127
UNINTEGRATED	infection_derived	LRTI	-0.183838	0.158002	277	57	0.245627	0.793032
ARGSYNBSUB.PWY..L.arginine.biosynthesis.II..acetyl.cycle.	infection_derived	LRTI	-0.0318382	0.0312875	277	3	0.309762	0.793032
ARO.PWY..chorismate.biosynthesis.I	infection_derived	LRTI	-0.0791567	0.104007	277	12	0.447267	0.793032
ASPASN.PWY..superpathway.of.L.aspartate.and.L.asparagine.biosynthesis	infection_derived	LRTI	0.0659705	0.0751543	277	9	0.380818	0.793032
COA.PWY.1..superpathway.of.coenzyme.A.biosynthesis.III..mammals.	infection_derived	LRTI	-0.0556676	0.0755037	277	6	0.461579	0.793032
FUCCAT.PWY..fucose.degradation	infection_derived	LRTI	0.0537174	0.0599054	277	3	0.370661	0.793032
GLCMANNANAUT.PWY..superpathway.of.N.acetylglucosamine..N.acetylmannosamine.and.N.acetylneuraminate.degradation	infection_derived	LRTI	0.0485717	0.0660179	277	5	0.462519	0.793032
GLUTORN.PWY..L.ornithine.biosynthesis.I	infection_derived	LRTI	-0.0199238	0.0279023	277	3	0.475799	0.793032
HOMOSER.METSYN.PWY..L.methionine.biosynthesis.I	infection_derived	LRTI	0.0871904	0.083757	277	6	0.298794	0.793032
HSERMETANA.PWY..L.methionine.biosynthesis.III	infection_derived	LRTI	0.082128	0.0810991	277	7	0.3121	0.793032
ILEUSYN.PWY..L.isoleucine.biosynthesis.I..from.threonine.	infection_derived	LRTI	-0.107037	0.144083	277	16	0.458185	0.793032
MET.SAM.PWY..superpathway.of.S.adenosyl.L.methionine.biosynthesis	infection_derived	LRTI	0.0788145	0.0765452	277	6	0.304081	0.793032
METSYN.PWY..superpathway.of.L.homoserine.and.L.methionine.biosynthesis	infection_derived	LRTI	0.0794373	0.0767136	277	6	0.301342	0.793032
NAD.BIOSYNTHESIS.II..NAD.salvage.pathway.III..to.nicotinamide.riboside.	infection_derived	LRTI	0.036946	0.0527517	277	5	0.484285	0.793032
NAGLIPASYN.PWY..lipid.IVA.biosynthesis..E..coli.	infection_derived	LRTI	-0.049752	0.063764	277	5	0.435914	0.793032
NONMEVIPP.PWY..methylerythritol.phosphate.pathway.I	infection_derived	LRTI	-0.0609048	0.0766109	277	6	0.427305	0.793032
PENTOSE.P.PWY..pentose.phosphate.pathway	infection_derived	LRTI	0.0662016	0.0871252	277	9	0.447999	0.793032
PWY.1042..glycolysis.IV	infection_derived	LRTI	0.108099	0.149025	277	16	0.468841	0.793032
PWY.5097..L.lysine.biosynthesis.VI	infection_derived	LRTI	-0.0636145	0.0925656	277	12	0.492513	0.793032
PWY.5103..L.isoleucine.biosynthesis.III	infection_derived	LRTI	-0.105931	0.14346	277	16	0.460902	0.793032
PWY.5347..superpathway.of.L.methionine.biosynthesis..transsulfuration.	infection_derived	LRTI	0.0784798	0.0755525	277	6	0.299836	0.793032
PWY.5837..2.carboxy.1.4.naphthoquinol.biosynthesis	infection_derived	LRTI	0.0668886	0.0622222	277	4	0.283319	0.793032
PWY.6121..5.aminoimidazole.ribonucleotide.biosynthesis.I	infection_derived	LRTI	-0.0531062	0.0689924	277	11	0.442115	0.793032
PWY.6122..5.aminoimidazole.ribonucleotide.biosynthesis.II	infection_derived	LRTI	-0.0737509	0.105025	277	12	0.483134	0.793032
PWY.6124..inosine.5..phosphate.biosynthesis.II	infection_derived	LRTI	-0.0419984	0.0621533	277	9	0.499784	0.793032
PWY.6147..6.hydroxymethyl.dihydropterin.diphosphate.biosynthesis.I	infection_derived	LRTI	-0.094464	0.104748	277	9	0.367939	0.793032
PWY.6163..chorismate.biosynthesis.from.3.dehydroquinate	infection_derived	LRTI	-0.0908929	0.104562	277	12	0.385455	0.793032
PWY.6277..superpathway.of.5.aminoimidazole.ribonucleotide.biosynthesis	infection_derived	LRTI	-0.0737509	0.105025	277	12	0.483134	0.793032
PWY.6317..D.galactose.degradation.I..Leloir.pathway.	infection_derived	LRTI	0.0207935	0.0212296	277	3	0.328214	0.793032
PWY.6519..8.amino.7.oxononanoate.biosynthesis.I	infection_derived	LRTI	0.0606597	0.0927359	277	9	0.513586	0.793032
PWY.6609..adenine.and.adenosine.salvage.III	infection_derived	LRTI	0.0762863	0.101125	277	10	0.451268	0.793032
PWY.6628..superpathway.of.L.phenylalanine.biosynthesis	infection_derived	LRTI	-0.078405	0.0828233	277	7	0.344646	0.793032
PWY.6629..superpathway.of.L.tryptophan.biosynthesis	infection_derived	LRTI	-0.0571457	0.086362	277	6	0.508718	0.793032
PWY.6897..thiamine.diphosphate.salvage.II	infection_derived	LRTI	0.0678944	0.0699908	277	4	0.332875	0.793032
PWY.702..L.methionine.biosynthesis.II	infection_derived	LRTI	0.0862187	0.0752027	277	7	0.252591	0.793032
PWY.7115..C4.photosynthetic.carbon.assimilation.cycle..NAD.ME.type	infection_derived	LRTI	-0.0474003	0.0480828	277	4	0.325095	0.793032
PWY.7117..C4.photosynthetic.carbon.assimilation.cycle..PEPCK.type	infection_derived	LRTI	-0.0666974	0.0558965	277	4	0.233807	0.793032
PWY.7187..pyrimidine.deoxyribonucleotides.de.novo.biosynthesis.II	infection_derived	LRTI	0.0658067	0.0681479	277	6	0.33507	0.793032
PWY.7208..superpathway.of.pyrimidine.nucleobases.salvage	infection_derived	LRTI	-0.11881	0.133727	277	17	0.375074	0.793032
PWY.7220..adenosine.deoxyribonucleotides.de.novo.biosynthesis.II	infection_derived	LRTI	-0.112572	0.137744	277	24	0.414491	0.793032
PWY.7221..guanosine.ribonucleotides.de.novo.biosynthesis	infection_derived	LRTI	-0.137779	0.168402	277	24	0.413978	0.793032
PWY.7222..guanosine.deoxyribonucleotides.de.novo.biosynthesis.II	infection_derived	LRTI	-0.112572	0.137744	277	24	0.414491	0.793032
PWY.7238..sucrose.biosynthesis.II	infection_derived	LRTI	0.0893637	0.0898272	277	5	0.320688	0.793032
PWY.7851..coenzyme.A.biosynthesis.II..eukaryotic.	infection_derived	LRTI	-0.0833942	0.0806391	277	7	0.301967	0.793032
PWY.7858...5Z..dodecenoate.biosynthesis.II	infection_derived	LRTI	0.162683	0.153606	277	10	0.290488	0.793032
PWY.8004..Entner.Doudoroff.pathway.I	infection_derived	LRTI	0.0560672	0.0636678	277	5	0.379292	0.793032
PWY.8073..lipid.IVA.biosynthesis..P..putida.	infection_derived	LRTI	-0.049752	0.063764	277	5	0.435914	0.793032
PWY.I9..L.cysteine.biosynthesis.VI..from.L.methionine.	infection_derived	LRTI	0.0595621	0.0558301	277	4	0.286977	0.793032
PWY0.1479..tRNA.processing	infection_derived	LRTI	-0.0659466	0.0988671	277	11	0.505317	0.793032
PWY0.1586..peptidoglycan.maturation..meso.diaminopimelate.containing.	infection_derived	LRTI	-0.111201	0.134284	277	18	0.408328	0.793032
PWY0.162..superpathway.of.pyrimidine.ribonucleotides.de.novo.biosynthesis	infection_derived	LRTI	-0.0216912	0.0209806	277	4	0.302106	0.793032
PWY66.429..fatty.acid.biosynthesis.initiation..mitochondria.	infection_derived	LRTI	-0.0768898	0.118824	277	18	0.518114	0.793032
SER.GLYSYN.PWY..superpathway.of.L.serine.and.glycine.biosynthesis.I	infection_derived	LRTI	-0.117018	0.151695	277	16	0.441128	0.793032
TRPSYN.PWY..L.tryptophan.biosynthesis	infection_derived	LRTI	-0.0648638	0.095517	277	6	0.497657	0.793032
VALSYN.PWY..L.valine.biosynthesis	infection_derived	LRTI	-0.176016	0.186076	277	20	0.345012	0.793032
ANAGLYCOLYSIS.PWY..glycolysis.III..from.glucose.	infection_derived	LRTI	0.0574088	0.106705	277	10	0.591002	0.803041
DAPLYSINESYN.PWY..L.lysine.biosynthesis.I	infection_derived	LRTI	-0.0546546	0.0977233	277	11	0.576426	0.803041
GLYCOGENSYNTH.PWY..glycogen.biosynthesis.I..from.ADP.D.Glucose.	infection_derived	LRTI	0.0284268	0.0528405	277	3	0.591031	0.803041
PWY.3001..superpathway.of.L.isoleucine.biosynthesis.I	infection_derived	LRTI	0.0398141	0.0753889	277	9	0.597844	0.803041
PWY.5484..glycolysis.II..from.fructose.6.phosphate.	infection_derived	LRTI	0.04648	0.0897861	277	9	0.605102	0.803041
PWY.5695..inosine.5..phosphate.degradation	infection_derived	LRTI	0.0605388	0.118654	277	13	0.610311	0.803041
PWY.5981..CDP.diacylglycerol.biosynthesis.III	infection_derived	LRTI	-0.0423607	0.0729217	277	8	0.56178	0.803041
PWY.5989..stearate.biosynthesis.II..bacteria.and.plants.	infection_derived	LRTI	0.0479128	0.0927281	277	11	0.605779	0.803041
PWY.6125..superpathway.of.guanosine.nucleotides.de.novo.biosynthesis.II	infection_derived	LRTI	-0.0603723	0.10402	277	14	0.562127	0.803041
PWY.6901..superpathway.of.glucose.and.xylose.degradation	infection_derived	LRTI	0.0271741	0.0510222	277	4	0.594745	0.803041
PWY.7184..pyrimidine.deoxyribonucleotides.de.novo.biosynthesis.I	infection_derived	LRTI	0.0275892	0.0515432	277	3	0.5929	0.803041
PWY.7228..superpathway.of.guanosine.nucleotides.de.novo.biosynthesis.I	infection_derived	LRTI	-0.0916717	0.153989	277	22	0.552124	0.803041
PWY.7282..4.amino.2.methyl.5.diphosphomethylpyrimidine.biosynthesis.II	infection_derived	LRTI	0.0400004	0.0638132	277	5	0.531287	0.803041
PWY.7434..terminal.O.glycans.residues.modification..via.type.2.precursor.disaccharide.	infection_derived	LRTI	0.024486	0.0402551	277	4	0.543509	0.803041
PWY.7953..UDP.N.acetylmuramoyl.pentapeptide.biosynthesis.III..meso.diaminopimelate.containing.	infection_derived	LRTI	0.0631443	0.102746	277	7	0.539349	0.803041
TRNA.CHARGING.PWY..tRNA.charging	infection_derived	LRTI	0.0464103	0.0835954	277	8	0.579224	0.803041
GLYCOLYSIS..glycolysis.I..from.glucose.6.phosphate.	infection_derived	LRTI	0.0454644	0.0920219	277	9	0.621658	0.803868
PWY.6700..queuosine.biosynthesis.I..de.novo.	infection_derived	LRTI	-0.0555747	0.112028	277	12	0.620236	0.803868
PWY.6151..S.adenosyl.L.methionine.salvage.I	infection_derived	LRTI	0.0464136	0.0973234	277	12	0.633812	0.806654
THRESYN.PWY..superpathway.of.L.threonine.biosynthesis	infection_derived	LRTI	-0.0470675	0.098915	277	14	0.634568	0.806654
PWY.6936..seleno.amino.acid.biosynthesis..plants.	infection_derived	LRTI	0.0400919	0.091348	277	10	0.661084	0.8333
PWY0.862...5Z..dodecenoate.biosynthesis.I	infection_derived	LRTI	0.0837853	0.195332	277	20	0.668304	0.835381
CALVIN.PWY..Calvin.Benson.Bassham.cycle	infection_derived	LRTI	-0.0450315	0.115874	277	13	0.697854	0.865109
PWY0.1061..superpathway.of.L.alanine.biosynthesis	infection_derived	LRTI	0.0370943	0.0984037	277	7	0.706494	0.86864
GLUCONEO.PWY..gluconeogenesis.I	infection_derived	LRTI	-0.0371608	0.106418	277	13	0.727208	0.879687
PWY.7664..oleate.biosynthesis.IV..anaerobic.	infection_derived	LRTI	0.0622185	0.174758	277	14	0.722094	0.879687
FASYN.ELONG.PWY..fatty.acid.elongation....saturated	infection_derived	LRTI	0.0579232	0.176514	277	14	0.743048	0.884945
FERMENTATION.PWY..mixed.acid.fermentation	infection_derived	LRTI	0.0230225	0.0719348	277	5	0.749176	0.884945
PWY.6282..palmitoleate.biosynthesis.I..from..5Z..dodec.5.enoate.	infection_derived	LRTI	0.0549312	0.17434	277	14	0.75294	0.884945
PWY.6823..molybdopterin.biosynthesis	infection_derived	LRTI	0.021908	0.0701811	277	9	0.755153	0.884945
PWY.7663..gondoate.biosynthesis..anaerobic.	infection_derived	LRTI	-0.0662626	0.226155	277	29	0.769746	0.895053
BIOTIN.BIOSYNTHESIS.PWY..biotin.biosynthesis.I	infection_derived	LRTI	0.0162917	0.0706479	277	4	0.817794	0.895395
NONOXIPENT.PWY..pentose.phosphate.pathway..non.oxidative.branch..I	infection_derived	LRTI	-0.0241029	0.101646	277	18	0.812736	0.895395
PPGPPMET.PWY..ppGpp.metabolism	infection_derived	LRTI	0.0304371	0.121645	277	13	0.80261	0.895395
PWY.6630..superpathway.of.L.tyrosine.biosynthesis	infection_derived	LRTI	-0.0172301	0.0711022	277	6	0.808706	0.895395
PWY.6703..preQ0.biosynthesis	infection_derived	LRTI	0.019623	0.0828451	277	9	0.812938	0.895395
PWY.7229..superpathway.of.adenosine.nucleotides.de.novo.biosynthesis.I	infection_derived	LRTI	0.0268281	0.110118	277	14	0.807699	0.895395
PWY.724..superpathway.of.L.lysine..L.threonine.and.L.methionine.biosynthesis.II	infection_derived	LRTI	0.0211229	0.0807434	277	10	0.793821	0.895395
RIBOSYN2.PWY..flavin.biosynthesis.I..bacteria.and.plants.	infection_derived	LRTI	0.0224073	0.0829599	277	7	0.787288	0.895395
X1CMET2.PWY..folate.transformations.III..E..coli.	infection_derived	LRTI	-0.00944845	0.0449288	277	3	0.833591	0.899558
PWY.8178..pentose.phosphate.pathway..non.oxidative.branch..II	infection_derived	LRTI	0.0184374	0.0863645	277	13	0.831108	0.899558
PWY.6386..UDP.N.acetylmuramoyl.pentapeptide.biosynthesis.II..lysine.containing.	infection_derived	LRTI	0.00508703	0.0252118	277	3	0.840244	0.900262
PWY.6126..superpathway.of.adenosine.nucleotides.de.novo.biosynthesis.II	infection_derived	LRTI	0.0204376	0.108549	277	14	0.850796	0.905102
PWY0.1241..ADP.L.glycero..beta..D.manno.heptose.biosynthesis	infection_derived	LRTI	-0.0164122	0.100824	277	10	0.87081	0.91987
PEPTIDOGLYCANSYN.PWY..peptidoglycan.biosynthesis.I..meso.diaminopimelate.containing.	infection_derived	LRTI	-0.0141239	0.0998317	277	7	0.887597	0.92458
PWY.7977..L.methionine.biosynthesis.IV	infection_derived	LRTI	-0.0155247	0.106013	277	9	0.88368	0.92458
PWY.3841..folate.transformations.II..plants.	infection_derived	LRTI	-0.0108445	0.0921104	277	9	0.906365	0.924862
PWY.7197..pyrimidine.deoxyribonucleotide.phosphorylation	infection_derived	LRTI	-0.0181168	0.140054	277	17	0.897171	0.924862
PWY.7357..thiamine.phosphate.formation.from.pyrithiamine.and.oxythiamine..yeast.	infection_derived	LRTI	0.011784	0.0973788	277	7	0.90377	0.924862
PWY.6387..UDP.N.acetylmuramoyl.pentapeptide.biosynthesis.I..meso.diaminopimelate.containing.	infection_derived	LRTI	0.0117435	0.106882	277	8	0.91259	0.924922
PWY.6385..peptidoglycan.biosynthesis.III..mycobacteria.	infection_derived	LRTI	-0.0097808	0.0982077	277	7	0.92074	0.926919
PWY.7111..pyruvate.fermentation.to.isobutanol..engineered.	infection_derived	LRTI	-0.000387517	0.0686404	277	7	0.9955	0.9955
