# Supplementary material for: Host–microbiome archetypes differentiate infection from pathogen carriage in the human lower airway
Source: Nat Commun. 2026 Apr 13;17:5149. doi: 10.1038/s41467-026-71863-5 (PMC13250161; doi:10.1038/s41467-026-71863-5)
Supplement: Supplementary file 6 — Supplementary Data 4 [file 41467_2026_71863_MOESM6_ESM.xlsx]

## Sheet: A (LRTI v CTRL)
ENSEMBL_ID	gene_symbol	logFC	AveExpr	t	P.Value	adj.P.Val	B
ENSG00000000419	DPM1	0.450006	0.92227	3.03784	0.00262594	0.0108933	-2.15488
ENSG00000000938	FGR	0.218457	5.67963	1.66518	0.0970837	0.184369	-5.46478
ENSG00000001036	FUCA2	-0.15707	0.803225	-1.19006	0.235112	0.36214	-5.95716
ENSG00000001084	GCLC	-0.221464	0.87469	-1.15918	0.247447	0.37579	-6.01838
ENSG00000001167	NFYA	0.293782	1.13577	2.02592	0.0437962	0.10024	-4.65575
ENSG00000001626	CFTR	0.277832	1.67127	0.741936	0.458797	0.590753	-6.46118
ENSG00000001629	ANKIB1	0.380761	1.25019	2.27062	0.0239901	0.0629909	-4.15927
ENSG00000001630	CYP51A1	-0.0209157	0.409642	-0.127101	0.898959	0.935559	-6.55997
ENSG00000001631	KRIT1	-0.499418	0.728921	-3.04633	0.00255545	0.0106683	-2.16542
ENSG00000002016	RAD52	0.083077	-0.459832	0.435636	0.663463	0.764143	-6.3031
ENSG00000002330	BAD	-0.399728	0.555911	-2.04516	0.041848	0.0966433	-4.58378
ENSG00000002549	LAP3	1.31523	3.73893	5.22799	3.52906e-07	6.86563e-06	6.06298
ENSG00000002586	CD99	-0.358934	3.15846	-2.62512	0.00917606	0.0296854	-3.45885
ENSG00000002587	HS3ST1	-0.374477	-0.0332604	-1.50382	0.133844	0.237877	-5.39051
ENSG00000002822	MAD1L1	-0.0497194	1.79603	-0.298889	0.765264	0.840203	-6.72147
ENSG00000002834	LASP1	-0.0350811	3.71581	-0.341269	0.733178	0.816263	-6.78143
ENSG00000002919	SNX11	0.201317	1.64503	1.34539	0.179676	0.29754	-5.84873
ENSG00000002933	TMEM176A	0.924851	1.67284	4.17963	3.99491e-05	0.00035501	1.65972
ENSG00000003056	M6PR	0.0810064	3.41629	0.601581	0.547978	0.671768	-6.65522
ENSG00000003147	ICA1	-0.608756	-0.0802011	-2.85177	0.00469758	0.0173322	-2.57937
ENSG00000003393	ALS2	0.00539167	0.132992	0.0326142	0.974007	0.9837	-6.51906
ENSG00000003400	CASP10	0.906929	1.54641	4.63345	5.69775e-06	7.14505e-05	3.50929
ENSG00000003402	CFLAR	0.729976	6.2858	6.23674	1.80477e-09	7.02219e-08	11.1387
ENSG00000003436	TFPI	-0.630869	0.152863	-3.66503	0.000299888	0.00186841	-0.133841
ENSG00000003509	NDUFAF7	0.0248995	-0.211108	0.141244	0.887787	0.927747	-6.41758
ENSG00000003756	RBM5	0.174564	3.66518	1.76365	0.0789689	0.156981	-5.30299
ENSG00000004059	ARF5	-0.0102012	2.72913	-0.0895244	0.928734	0.956024	-6.81419
ENSG00000004142	POLDIP2	0.0798121	0.447183	0.574581	0.566073	0.687189	-6.40785
ENSG00000004399	PLXND1	-0.463439	2.55473	-2.85899	0.00459525	0.0170379	-2.82728
ENSG00000004455	AK2	0.217893	2.22666	1.65806	0.098515	0.186505	-5.4322
ENSG00000004468	CD38	1.5288	1.322	5.4311	1.28834e-07	2.93575e-06	7.17098
ENSG00000004478	FKBP4	-0.365591	1.4508	-1.85178	0.0651933	0.135507	-5.0687
ENSG00000004487	KDM1A	-0.852162	-0.135974	-6.16822	2.63706e-09	9.79592e-08	10.8895
ENSG00000004534	RBM6	0.0749869	1.78206	0.67589	0.499713	0.627926	-6.52893
ENSG00000004660	CAMKK1	-0.239879	-0.0905944	-1.41954	0.156941	0.268777	-5.50521
ENSG00000004700	RECQL	0.0225856	0.271144	0.13311	0.894209	0.932252	-6.53963
ENSG00000004766	VPS50	-0.0947048	0.00704994	-0.472388	0.637047	0.74399	-6.39923
ENSG00000004779	NDUFAB1	-0.535338	0.577956	-2.61878	0.00934389	0.0300592	-3.31388
ENSG00000004838	ZMYND10	-1.29291	0.0838671	-4.62273	5.97683e-06	7.43319e-05	3.49737
ENSG00000004864	SLC25A13	0.738295	2.46718	3.1896	0.00159982	0.00730116	-1.83724
ENSG00000004866	ST7	-1.15851	-0.492937	-5.6022	5.39349e-08	1.39066e-06	8.02304
ENSG00000004897	CDC27	0.150924	1.8069	1.24297	0.215	0.33983	-5.99628
ENSG00000004975	DVL2	-0.118887	1.16403	-0.784988	0.433177	0.567123	-6.40359
ENSG00000005001	PRSS22	-0.518047	0.185288	-1.83208	0.0680866	0.1402	-4.92479
ENSG00000005007	UPF1	-0.163774	2.41181	-1.50351	0.133924	0.237968	-5.69407
ENSG00000005020	SKAP2	0.142086	3.37811	0.982655	0.326693	0.460938	-6.35542
ENSG00000005022	SLC25A5	-0.558955	2.3454	-3.77626	0.000197436	0.00130559	0.0681982
ENSG00000005059	MCUB	-0.132135	1.18212	-0.728257	0.467113	0.59881	-6.44244
ENSG00000005075	POLR2J	-0.0431512	1.42917	-0.304354	0.761102	0.836949	-6.68811
ENSG00000005156	LIG3	-0.114568	1.01591	-0.717221	0.473883	0.604886	-6.43049
ENSG00000005175	RPAP3	0.0802622	0.247427	0.393744	0.694094	0.787173	-6.4629
ENSG00000005187	ACSM3	0.248887	0.84785	1.09882	0.272866	0.403803	-6.03012
ENSG00000005194	CIAPIN1	-0.0505866	-0.0571251	-0.273365	0.78479	0.854103	-6.44118
ENSG00000005206	SPPL2B	-0.453263	0.944742	-2.52298	0.012235	0.0371047	-3.59205
ENSG00000005238	FAM214B	-0.228653	1.77036	-1.54533	0.123486	0.223005	-5.58976
ENSG00000005302	MSL3	0.592309	2.79097	4.05623	6.60178e-05	0.000539318	1.10472
ENSG00000005339	CREBBP	0.287562	4.38497	1.57879	0.115604	0.211683	-5.61031
ENSG00000005379	TSPOAP1	0.197222	1.30756	0.862906	0.388987	0.52433	-6.3299
ENSG00000005448	WDR54	-0.987844	-0.80094	-4.43885	1.33867e-05	0.000143863	2.86231
ENSG00000005483	KMT2E	0.503672	3.73806	4.26143	2.845e-05	0.000267192	1.87148
ENSG00000005486	RHBDD2	-0.42127	2.84795	-2.99307	0.00302828	0.0122051	-2.45873
ENSG00000005700	IBTK	-0.324422	0.120238	-2.48658	0.0135275	0.0402066	-3.54001
ENSG00000005801	ZNF195	-0.420663	0.00678252	-2.05087	0.0412846	0.0957601	-4.48719
ENSG00000005810	MYCBP2	0.331395	1.99639	2.64934	0.0085599	0.0280412	-3.33446
ENSG00000005812	FBXL3	0.388371	1.45403	2.70745	0.00723075	0.0245701	-3.13269
ENSG00000005844	ITGAL	-0.0241643	3.09563	-0.175929	0.860487	0.910038	-6.81336
ENSG00000005884	ITGA3	-1.03618	-0.120804	-4.90288	1.66717e-06	2.53657e-05	4.73816
ENSG00000005889	ZFX	0.346014	2.25066	2.43411	0.015604	0.0450516	-3.88367
ENSG00000005893	LAMP2	0.289491	3.35165	2.05946	0.0404483	0.0943984	-4.74383
ENSG00000006007	GDE1	-0.33295	0.611742	-2.05711	0.0406757	0.0946716	-4.56054
ENSG00000006015	REX1BD	-0.647301	0.713633	-3.8707	0.000137384	0.000977172	0.51622
ENSG00000006118	TMEM132A	-0.0256234	0.812159	-0.142928	0.886458	0.926653	-6.64344
ENSG00000006125	AP2B1	0.393528	3.07221	3.28144	0.00117445	0.00567563	-1.58907
ENSG00000006194	ZNF263	-0.019655	0.0217649	-0.134803	0.892872	0.931432	-6.50574
ENSG00000006282	SPATA20	-0.331712	0.172635	-2.2637	0.0244187	0.0637776	-4.07339
ENSG00000006327	TNFRSF12A	-1.04553	0.781391	-4.65394	5.19914e-06	6.60391e-05	3.57792
ENSG00000006451	RALA	0.24616	1.7523	1.52369	0.128804	0.230858	-5.60226
ENSG00000006453	BAIAP2L1	0.00640504	0.73869	0.041527	0.966908	0.97997	-6.64122
ENSG00000006459	KDM7A	0.263073	1.06305	1.84219	0.0665889	0.137818	-4.98694
ENSG00000006530	AGK	0.0619766	1.21024	0.44038	0.660029	0.761435	-6.60341
ENSG00000006534	ALDH3B1	-0.698975	1.62712	-4.57673	7.32985e-06	8.73548e-05	3.19824
ENSG00000006576	PHTF2	0.346107	-0.146271	1.98365	0.0483492	0.108293	-4.51261
ENSG00000006607	FARP2	-0.673979	0.649462	-3.33025	0.00099373	0.00496311	-1.31407
ENSG00000006634	DBF4	0.57351	-0.26107	2.52438	0.0121877	0.0370294	-3.31803
ENSG00000006652	IFRD1	0.334299	4.15107	2.05828	0.0405623	0.0945749	-4.75498
ENSG00000006712	PAF1	0.420921	2.61015	3.42233	0.000721265	0.00381113	-1.12395
ENSG00000006715	VPS41	-0.118129	1.89033	-0.816472	0.414979	0.549705	-6.44416
ENSG00000006744	ELAC2	-0.35665	0.600894	-2.09501	0.0371397	0.0884596	-4.48933
ENSG00000006747	SCIN	-0.0707584	-0.0464314	-0.318932	0.750035	0.829448	-6.4399
ENSG00000006756	ARSD	-0.60127	0.331709	-4.75519	3.29159e-06	4.5066e-05	4.06931
ENSG00000006831	ADIPOR2	0.0355734	1.4693	0.258368	0.796328	0.863141	-6.70215
ENSG00000006837	CDKL3	0.284382	-0.23493	1.32767	0.185453	0.304622	-5.55763
ENSG00000007047	MARK4	-0.118392	1.5497	-0.899903	0.369006	0.504024	-6.34514
ENSG00000007062	PROM1	-1.64049	-0.493768	-6.69934	1.29466e-10	6.56938e-09	13.7783
ENSG00000007080	CCDC124	-0.666238	1.13404	-4.38081	1.71759e-05	0.00017552	2.4279
ENSG00000007129	CEACAM21	0.0838918	-0.469157	0.394455	0.693569	0.786759	-6.30822
ENSG00000007168	PAFAH1B1	0.142284	3.42084	1.46046	0.145375	0.25378	-5.78028
ENSG00000007174	DNAH9	-1.5307	-0.552473	-6.64965	1.72867e-10	8.38278e-09	13.502
ENSG00000007202	KIAA0100	-0.176966	2.07727	-1.5737	0.116777	0.213473	-5.56849
ENSG00000007237	AC005747.1	0.6481	3.60025	3.91989	0.000113422	0.000837604	0.573505
ENSG00000007264	MATK	-0.150196	-0.0445361	-0.646643	0.518435	0.644866	-6.29615
ENSG00000007341	ST7L	0.363113	0.902652	2.59374	0.0100334	0.0317481	-3.35757
ENSG00000007392	LUC7L	-0.266711	0.984694	-2.14266	0.033071	0.0810432	-4.44274
ENSG00000007516	BAIAP3	-1.23305	0.185633	-5.34415	1.99016e-07	4.29631e-06	6.72201
ENSG00000007520	TSR3	-0.151059	0.49358	-0.942611	0.346757	0.481246	-6.17128
ENSG00000007541	PIGQ	-0.891733	0.367129	-4.78935	2.81641e-06	3.94377e-05	4.2022
ENSG00000007545	CRAMP1	-0.159913	-0.0577264	-0.709003	0.478959	0.609078	-6.25585
ENSG00000007923	DNAJC11	-0.369204	0.171141	-1.86452	0.063378	0.132574	-4.85462
ENSG00000007944	MYLIP	0.824358	1.14397	4.55955	7.90748e-06	9.30002e-05	3.23347
ENSG00000008018	PSMB1	0.208214	2.24814	1.36011	0.174976	0.291782	-5.87538
ENSG00000008083	JARID2	0.135417	1.72583	1.02375	0.306906	0.441435	-6.23162
ENSG00000008086	CDKL5	-0.0854244	0.621509	-0.4079	0.683684	0.780311	-6.53663
ENSG00000008128	CDK11A	0.255009	2.09503	1.76564	0.0786327	0.156471	-5.23909
ENSG00000008130	NADK	0.890974	5.52725	7.2388	5.12974e-12	4.13912e-10	16.8217
ENSG00000008226	DLEC1	-1.54383	-0.279589	-8.43133	2.39843e-15	5.62147e-13	24.2753
ENSG00000008256	CYTH3	-0.523646	-0.0998995	-2.69826	0.00742764	0.0250852	-2.98998
ENSG00000008282	SYPL1	-0.190208	0.998149	-1.36087	0.174736	0.291592	-5.77333
ENSG00000008283	CYB561	-0.991704	0.0570597	-4.76126	3.20187e-06	4.39599e-05	4.10576
ENSG00000008294	SPAG9	0.338683	4.2645	2.44647	0.0150908	0.0438082	-3.90453
ENSG00000008323	PLEKHG6	0.0772158	1.67588	0.369088	0.712363	0.80152	-6.67888
ENSG00000008382	MPND	-0.600236	0.171019	-3.15903	0.00177044	0.00793635	-1.76232
ENSG00000008394	MGST1	-0.646542	1.44937	-3.0984	0.00215972	0.00934782	-2.09456
ENSG00000008438	PGLYRP1	-0.220161	1.01085	-0.828059	0.408399	0.54262	-6.33419
ENSG00000008513	ST3GAL1	0.125163	3.16942	0.960551	0.337672	0.472233	-6.37234
ENSG00000008516	MMP25	0.303259	4.635	1.33341	0.183566	0.302492	-5.96206
ENSG00000008517	IL32	0.924651	1.95894	3.58387	0.000404298	0.00241353	-0.524342
ENSG00000008710	PKD1	-0.99176	1.2597	-5.21879	3.69148e-07	7.12527e-06	6.06017
ENSG00000008838	MED24	-0.219801	1.72297	-1.49009	0.137416	0.242685	-5.67188
ENSG00000008869	HEATR5B	0.260393	0.78202	1.40428	0.161432	0.274799	-5.64094
ENSG00000008952	SEC62	-0.121656	3.4331	-0.916133	0.360448	0.494874	-6.42113
ENSG00000008988	RPS20	-0.440481	4.59106	-2.84962	0.00472852	0.0174335	-2.87251
ENSG00000009307	CSDE1	-0.0381881	3.71715	-0.351618	0.72541	0.809838	-6.77779
ENSG00000009335	UBE3C	-0.195037	1.01069	-1.54581	0.12337	0.222835	-5.51414
ENSG00000009413	REV3L	-0.00539413	1.2545	-0.0299973	0.976092	0.984861	-6.70803
ENSG00000009780	FAM76A	-0.217206	-0.147707	-1.11789	0.264646	0.394844	-5.86165
ENSG00000009790	TRAF3IP3	0.393079	2.80912	2.22512	0.0269334	0.0688298	-4.37942
ENSG00000009830	POMT2	-0.679253	-0.0124118	-3.18423	0.00162864	0.00740867	-1.6686
ENSG00000009844	VTA1	0.52297	0.529069	2.80802	0.00536357	0.0192979	-2.72405
ENSG00000009954	BAZ1B	-0.128165	0.187551	-0.98476	0.32566	0.460047	-6.0633
ENSG00000010017	RANBP9	0.381121	1.1856	2.68525	0.00771486	0.0258317	-3.15731
ENSG00000010030	ETV7	2.52415	0.677859	6.1149	3.53504e-09	1.25176e-07	10.6157
ENSG00000010219	DYRK4	-0.483912	-0.551191	-2.09244	0.0373715	0.0887968	-4.30989
ENSG00000010244	ZNF207	0.432388	3.64097	3.45489	0.000642925	0.00349473	-1.04521
ENSG00000010256	UQCRC1	-0.424261	2.56063	-3.31553	0.00104532	0.0051683	-1.4809
ENSG00000010270	STARD3NL	0.0660133	1.418	0.591377	0.554783	0.677915	-6.55282
ENSG00000010278	CD9	-1.09285	2.6387	-4.86257	2.01048e-06	2.97945e-05	4.39301
ENSG00000010292	NCAPD2	-0.0260143	0.457849	-0.165548	0.868642	0.915949	-6.57993
ENSG00000010295	IFFO1	0.02685	0.131009	0.203594	0.838831	0.893663	-6.4776
ENSG00000010310	GIPR	-0.819146	-0.434608	-4.09707	5.59786e-05	0.000474637	1.49735
ENSG00000010322	NISCH	-0.18045	1.36433	-1.52389	0.128754	0.230823	-5.58591
ENSG00000010327	STAB1	0.348101	2.47968	1.91712	0.0563214	0.121585	-4.98235
ENSG00000010361	FUZ	-0.866119	-0.0569629	-4.37118	1.78971e-05	0.000181815	2.5104
ENSG00000010404	IDS	-0.279997	3.26254	-2.88558	0.00423549	0.0159671	-2.76943
ENSG00000010539	ZNF200	0.443638	1.3901	2.75141	0.00635224	0.0222076	-3.00794
ENSG00000010610	CD4	-0.456267	1.89373	-3.06417	0.00241291	0.0102197	-2.2148
ENSG00000010626	LRRC23	-1.12568	0.284645	-5.13936	5.42912e-07	9.82432e-06	5.75886
ENSG00000010671	BTK	0.308755	1.86346	2.11935	0.0350113	0.0847434	-4.54581
ENSG00000010803	SCMH1	-0.437445	-0.301307	-2.52491	0.0121697	0.0369863	-3.36422
ENSG00000010810	FYN	0.242173	2.01406	1.35545	0.176453	0.293561	-5.85476
ENSG00000010818	HIVEP2	0.798923	1.99617	4.66876	4.86504e-06	6.26032e-05	3.6141
ENSG00000011007	ELOA	-0.206878	0.248462	-1.41635	0.157873	0.269856	-5.57596
ENSG00000011009	LYPLA2	-0.0747441	1.82654	-0.630884	0.528672	0.653912	-6.57065
ENSG00000011021	CLCN6	0.288504	1.11667	1.85455	0.0647952	0.135022	-4.97924
ENSG00000011114	BTBD7	-0.0553558	0.748031	-0.436203	0.663052	0.763938	-6.54876
ENSG00000011132	APBA3	0.099161	0.814312	0.630847	0.528696	0.653912	-6.44907
ENSG00000011198	ABHD5	-0.494827	2.34239	-2.94683	0.0035026	0.0136607	-2.57785
ENSG00000011243	AKAP8L	-0.0900167	1.95553	-0.795092	0.427287	0.561427	-6.46536
ENSG00000011260	UTP18	0.597974	1.36164	4.06562	6.35676e-05	0.000524526	1.23259
ENSG00000011275	RNF216	-0.251531	0.760377	-1.86273	0.0636304	0.132934	-4.95023
ENSG00000011295	TTC19	-0.267033	0.679474	-1.87462	0.0619687	0.130458	-4.92033
ENSG00000011304	PTBP1	-0.25393	3.03898	-2.00694	0.0457939	0.104134	-4.84796
ENSG00000011405	PIK3C2A	-0.11227	0.247032	-0.654843	0.513149	0.64072	-6.33419
ENSG00000011422	PLAUR	0.0820272	7.36159	0.511305	0.609573	0.722794	-6.67809
ENSG00000011451	WIZ	-0.37527	0.0871418	-2.59529	0.00998933	0.0316495	-3.27055
ENSG00000011454	RABGAP1	0.363567	1.40106	2.61164	0.00953603	0.0305874	-3.37423
ENSG00000011485	PPP5C	-0.630435	0.281295	-3.45156	0.000650561	0.00353039	-0.862934
ENSG00000011523	CEP68	0.460773	1.20596	3.12559	0.00197628	0.00867728	-1.92689
ENSG00000011566	MAP4K3	-0.504743	0.749399	-2.63233	0.00898849	0.0291926	-3.2852
ENSG00000011600	TYROBP	-0.0673393	6.82686	-0.647893	0.517627	0.644513	-6.60633
ENSG00000011638	TMEM159	-0.125602	0.222278	-0.834186	0.404944	0.539911	-6.20533
ENSG00000012048	BRCA1	-0.0310459	0.389784	-0.167553	0.867065	0.91488	-6.55524
ENSG00000012061	ERCC1	-0.460983	1.74041	-3.30682	0.00107699	0.00530357	-1.4691
ENSG00000012124	CD22	0.926305	2.45423	3.53521	0.000482387	0.00278185	-0.728614
ENSG00000012171	SEMA3B	0.00518951	-0.0725027	0.0293029	0.976646	0.985152	-6.45815
ENSG00000012211	PRICKLE3	-0.295328	-0.161537	-1.69759	0.0907854	0.175199	-5.08663
ENSG00000012223	LTF	0.0943219	1.15149	0.417621	0.676569	0.774639	-6.6085
ENSG00000012232	EXTL3	-0.0639459	1.51959	-0.419989	0.674841	0.773628	-6.65352
ENSG00000012660	ELOVL5	0.388361	3.12446	3.33851	0.000965856	0.00484355	-1.4112
ENSG00000012779	ALOX5	0.0971776	5.43291	0.624565	0.532806	0.657673	-6.64305
ENSG00000012822	CALCOCO1	-0.24752	1.95281	-2.14581	0.0328166	0.0805144	-4.52375
ENSG00000012983	MAP4K5	-0.781397	0.675146	-4.38348	1.69813e-05	0.000174031	2.47199
ENSG00000013275	PSMC4	-0.104149	1.67275	-0.901565	0.368124	0.503098	-6.35336
ENSG00000013288	MAN2B2	-0.339804	0.698302	-2.82214	0.00513983	0.0186634	-2.77795
ENSG00000013306	SLC25A39	-0.450207	1.42146	-3.26078	0.0012598	0.00602305	-1.592
ENSG00000013364	MVP	0.0315979	4.19505	0.356102	0.722054	0.807532	-6.77845
ENSG00000013374	NUB1	1.28249	2.7871	5.95039	8.63327e-09	2.76827e-07	9.65666
ENSG00000013375	PGM3	-0.789647	-0.00357656	-3.91782	0.000114342	0.000842499	0.77138
ENSG00000013441	CLK1	0.389254	3.47603	3.1232	0.0019918	0.00872988	-2.08183
ENSG00000013561	RNF14	-0.13905	0.600193	-0.994217	0.321044	0.455514	-6.12816
ENSG00000013563	DNASE1L1	-0.179442	1.31725	-1.18933	0.235397	0.362466	-6.0206
ENSG00000013573	DDX11	-0.879544	0.827867	-3.31924	0.0010321	0.0051234	-1.36236
ENSG00000013583	HEBP1	-0.329638	0.249758	-1.99921	0.0466284	0.105594	-4.61787
ENSG00000013588	GPRC5A	-0.918178	0.912796	-3.57898	0.000411581	0.00245254	-0.528006
ENSG00000013725	CD6	-0.242868	1.07504	-1.38619	0.166879	0.281294	-5.75517
ENSG00000013810	TACC3	0.0981966	1.95548	0.731118	0.465367	0.597038	-6.50378
ENSG00000014164	ZC3H3	0.309452	1.82813	2.02356	0.0440407	0.100747	-4.73658
ENSG00000014216	CAPN1	-0.31081	2.85694	-3.08839	0.00223105	0.00958642	-2.18103
ENSG00000014257	ACPP	0.39772	0.434647	1.88983	0.0598962	0.127338	-4.78321
ENSG00000014824	SLC30A9	-0.160507	0.426098	-1.13995	0.255357	0.384833	-5.95054
ENSG00000014919	COX15	-0.0473766	0.401892	-0.317662	0.750997	0.830186	-6.53608
ENSG00000015133	CCDC88C	-0.431758	1.21046	-2.55483	0.0111956	0.0346025	-3.52607
ENSG00000015153	YAF2	0.309357	0.914839	1.71349	0.0878177	0.170576	-5.19222
ENSG00000015171	ZMYND11	-0.4476	-0.0806734	-2.78587	0.00573237	0.020379	-2.75736
ENSG00000015285	WAS	0.39249	4.01678	3.12592	0.00197416	0.00867186	-2.08001
ENSG00000015475	BID	0.468477	4.39623	2.95232	0.00344296	0.0134869	-2.58672
ENSG00000015479	MATR3	-0.051108	2.28175	-0.420247	0.674653	0.773502	-6.71277
ENSG00000015568	RGPD5	-0.758723	2.10547	-3.43832	0.000681732	0.0036592	-1.07786
ENSG00000015676	NUDCD3	-0.395417	0.627264	-2.60846	0.00962272	0.0307552	-3.33792
ENSG00000016864	GLT8D1	-0.110759	0.0338469	-0.608413	0.543446	0.66755	-6.32335
ENSG00000017260	ATP2C1	0.0215784	2.054	0.155953	0.876191	0.920417	-6.77032
ENSG00000017483	SLC38A5	0.92314	-0.572721	3.18625	0.00161773	0.00736582	-1.43749
ENSG00000017797	RALBP1	-0.166466	1.57014	-1.6542	0.0992972	0.187797	-5.40496
ENSG00000018189	RUFY3	-0.298311	1.44767	-1.98599	0.0480875	0.107855	-4.811
ENSG00000018280	SLC11A1	-0.528494	6.2931	-3.3609	0.000893872	0.00456631	-1.33658
ENSG00000018510	AGPS	-0.312126	0.72661	-2.19251	0.0292311	0.0734235	-4.30918
ENSG00000019144	PHLDB1	-0.198026	0.335183	-0.946091	0.344983	0.479662	-6.15062
ENSG00000019169	MARCO	-1.68308	2.87585	-6.8948	4.09563e-11	2.50419e-09	14.8042
ENSG00000019582	CD74	-0.665493	7.01002	-2.99357	0.00302354	0.0122036	-2.43885
ENSG00000020577	SAMD4A	-0.202844	0.281092	-0.857972	0.3917	0.526259	-6.21755
ENSG00000020633	RUNX3	0.682393	1.66339	3.63458	0.000335671	0.00204857	-0.335655
ENSG00000020922	MRE11	-0.0490013	0.0915114	-0.341112	0.733296	0.816302	-6.46703
ENSG00000021355	SERPINB1	0.519753	5.7586	4.34537	1.99747e-05	0.000197619	2.20619
ENSG00000021574	SPAST	0.207487	1.33229	1.93933	0.0535453	0.117316	-4.85994
ENSG00000021762	OSBPL5	-0.306851	0.327791	-1.51549	0.130865	0.233758	-5.45947
ENSG00000022277	RTF2	0.258609	3.43597	2.22829	0.026719	0.068353	-4.39291
ENSG00000022556	NLRP2	-0.0670253	0.197193	-0.302691	0.762368	0.837865	-6.4893
ENSG00000022567	SLC45A4	0.3182	2.61201	1.96936	0.0499759	0.111228	-4.89616
ENSG00000022840	RNF10	0.192212	4.4223	1.68842	0.0925317	0.177733	-5.43435
ENSG00000023041	ZDHHC6	0.172346	0.932739	1.18963	0.235281	0.362345	-5.94693
ENSG00000023171	GRAMD1B	0.95838	0.859405	4.49556	1.04677e-05	0.000117496	3.00874
ENSG00000023191	RNH1	-0.684846	2.93276	-4.87358	1.91048e-06	2.8452e-05	4.43903
ENSG00000023228	NDUFS1	-0.30781	0.97726	-2.2225	0.0271123	0.0691613	-4.27434
ENSG00000023287	RB1CC1	0.293071	1.63036	2.42654	0.0159257	0.0457731	-3.85326
ENSG00000023318	ERP44	0.472249	0.828794	3.15049	0.00182106	0.00809477	-1.80071
ENSG00000023330	ALAS1	-0.351859	1.97037	-2.3557	0.0192324	0.052928	-4.07084
ENSG00000023445	BIRC3	0.93364	1.96334	5.54624	7.18613e-08	1.7641e-06	7.64594
ENSG00000023608	SNAPC1	0.386667	0.248465	1.99822	0.0467365	0.105764	-4.57773
ENSG00000023697	DERA	-0.0381699	0.10162	-0.222652	0.823982	0.883293	-6.47883
ENSG00000023734	STRAP	-0.147532	1.44243	-1.18739	0.236161	0.363361	-6.03743
ENSG00000023892	DEF6	0.290294	1.71817	1.93466	0.0541193	0.118179	-4.89409
ENSG00000023902	PLEKHO1	0.700243	2.36003	4.2306	3.2352e-05	0.000298195	1.797
ENSG00000023909	GCLM	0.487388	1.69873	2.59557	0.00998134	0.0316344	-3.44233
ENSG00000024048	UBR2	0.253909	1.4552	2.21014	0.0279691	0.0708437	-4.32169
ENSG00000024862	CCDC28A	0.445589	0.405925	2.57206	0.010667	0.0333011	-3.31847
ENSG00000025039	RRAGD	0.302518	1.47908	2.06526	0.0398923	0.0934063	-4.62672
ENSG00000025293	PHF20	-0.022988	2.43615	-0.171557	0.863919	0.912967	-6.79315
ENSG00000025434	NR1H3	0.0224619	2.18263	0.110322	0.912239	0.944973	-6.78819
ENSG00000025708	TYMP	0.402306	6.3122	3.28675	0.0011534	0.00560143	-1.57714
ENSG00000025770	NCAPH2	-0.253606	0.810235	-1.84212	0.0665988	0.137818	-4.99754
ENSG00000025796	SEC63	-0.129458	1.79828	-0.896015	0.371076	0.505868	-6.37401
ENSG00000025800	KPNA6	-0.00853571	0.627902	-0.0627631	0.950003	0.968901	-6.60926
ENSG00000026025	VIM	-0.362166	7.36088	-2.60205	0.00979957	0.0311547	-3.49077
ENSG00000026103	FAS	1.48052	2.32465	7.30821	3.34722e-12	2.91593e-10	17.2746
ENSG00000026297	RNASET2	0.21061	3.80689	1.53694	0.125527	0.22615	-5.67161
ENSG00000026508	CD44	0.0969617	7.44594	0.744475	0.457263	0.589252	-6.5316
ENSG00000026652	AGPAT4	0.105407	0.85378	0.635471	0.525681	0.651083	-6.42836
ENSG00000026751	SLAMF7	2.39837	4.05601	8.9825	5.58164e-17	2.49753e-14	27.9698
ENSG00000026950	BTN3A1	1.58944	1.77956	6.81236	6.67235e-11	3.79669e-09	14.398
ENSG00000027075	PRKCH	0.0952788	3.85282	0.498464	0.61858	0.729607	-6.71638
ENSG00000027697	IFNGR1	0.315867	4.09816	2.07838	0.0386578	0.0911055	-4.71416
ENSG00000027847	B4GALT7	-1.12699	-0.482982	-5.62442	4.80976e-08	1.2559e-06	8.13393
ENSG00000027869	SH2D2A	0.806299	-0.40849	3.06826	0.00238128	0.0101171	-1.80883
ENSG00000028116	VRK2	0.13152	1.04706	0.946975	0.344533	0.479308	-6.22272
ENSG00000028137	TNFRSF1B	0.483304	5.67743	2.93633	0.00361936	0.0140106	-2.62681
ENSG00000028203	VEZT	-0.0178651	1.08339	-0.131805	0.89524	0.932862	-6.67711
ENSG00000028277	POU2F2	-0.021594	1.72611	-0.105793	0.915828	0.946798	-6.75267
ENSG00000028310	BRD9	-0.429417	1.29045	-3.21119	0.00148863	0.00690204	-1.72732
ENSG00000028528	SNX1	0.32989	3.45058	2.19383	0.0291351	0.0732207	-4.46622
ENSG00000028839	TBPL1	1.44435	1.49849	5.19144	4.21797e-07	8.00032e-06	6.02441
ENSG00000029153	ARNTL2	0.855417	0.427316	4.2467	3.02539e-05	0.000280697	2.04431
ENSG00000029363	BCLAF1	0.26882	2.76055	2.51314	0.0125732	0.0379315	-3.71947
ENSG00000029364	SLC39A9	0.00188769	0.680097	0.0170146	0.986438	0.99117	-6.62196
ENSG00000029725	RABEP1	0.0401527	1.37079	0.309993	0.756815	0.834183	-6.6708
ENSG00000029993	HMGB3	-0.412064	1.37801	-1.20667	0.228659	0.355315	-6.02951
ENSG00000030066	NUP160	0.130696	1.17117	0.836372	0.403715	0.538725	-6.34402
ENSG00000030110	BAK1	0.587305	0.298363	3.38964	0.000808817	0.00420824	-0.985281
ENSG00000030582	GRN	-0.231643	5.84922	-1.45288	0.147467	0.256289	-5.7862
ENSG00000031003	FAM13B	0.263801	1.67369	2.37011	0.0185149	0.0514879	-3.9911
ENSG00000031081	ARHGAP31	0.610257	0.882362	3.36012	0.000896303	0.00457211	-1.16193
ENSG00000031698	SARS1	-0.169714	1.13587	-1.4272	0.154726	0.265768	-5.70147
ENSG00000031823	RANBP3	-0.147956	2.01852	-1.08118	0.28062	0.412066	-6.20922
ENSG00000032219	ARID4A	0.463259	1.62401	3.25332	0.00129198	0.00614265	-1.58932
ENSG00000032389	EIPR1	0.0785082	0.273468	0.465238	0.642151	0.748087	-6.42882
ENSG00000032444	PNPLA6	-0.619251	4.16331	-3.98577	8.74802e-05	0.000673878	0.808726
ENSG00000032742	IFT88	-0.308761	-0.398561	-1.82438	0.0692454	0.141922	-4.82985
ENSG00000033030	ZCCHC8	0.0380322	0.042678	0.290442	0.77171	0.844361	-6.45733
ENSG00000033050	ABCF2	-0.416122	-0.396518	-1.92115	0.0558093	0.120797	-4.6546
ENSG00000033100	CHPF2	0.179121	0.936824	1.45546	0.146752	0.255574	-5.61771
ENSG00000033170	FUT8	-0.222259	0.131972	-0.915402	0.360831	0.495331	-6.14976
ENSG00000033178	UBA6	0.373711	1.85875	2.29796	0.02236	0.059538	-4.16202
ENSG00000033327	GAB2	0.0982505	3.33886	0.730031	0.46603	0.597721	-6.5693
ENSG00000033627	ATP6V0A1	-0.0425721	2.93495	-0.307529	0.758688	0.835368	-6.77961
ENSG00000033800	PIAS1	0.390208	2.67677	3.14204	0.00187244	0.00826932	-2.00324
ENSG00000033867	SLC4A7	-0.386548	-0.0199817	-2.3394	0.0200739	0.0547202	-3.85775
ENSG00000034152	MAP2K3	-0.0543778	4.79124	-0.370003	0.711682	0.800989	-6.77244
ENSG00000034239	EFCAB1	-1.18312	-0.593679	-4.78169	2.91685e-06	4.07284e-05	4.25635
ENSG00000034510	TMSB10	0.217777	6.80211	1.26269	0.207836	0.330523	-6.02947
ENSG00000034677	RNF19A	0.114355	2.59508	0.896897	0.370605	0.505436	-6.41207
ENSG00000034713	GABARAPL2	0.498384	3.75723	3.38068	0.000834479	0.00430761	-1.28694
ENSG00000035115	SH3YL1	-0.732217	0.11091	-3.95262	9.97359e-05	0.000747753	0.888902
ENSG00000035403	VCL	-0.140639	0.859605	-0.917851	0.35955	0.493801	-6.23824
ENSG00000035664	DAPK2	-0.200429	0.863709	-1.11332	0.2666	0.396916	-6.05759
ENSG00000035681	NSMAF	0.789464	3.73118	4.89781	1.70703e-06	2.58125e-05	4.54688
ENSG00000035687	ADSS2	-0.0961903	0.931153	-0.757911	0.449192	0.581899	-6.38493
ENSG00000035862	TIMP2	-0.322302	2.9487	-2.33802	0.0201465	0.0548584	-4.14503
ENSG00000035928	RFC1	0.142426	1.39464	0.858689	0.391305	0.525943	-6.35167
ENSG00000036054	TBC1D23	0.494873	0.967962	3.34692	0.000938218	0.00474362	-1.22306
ENSG00000036257	CUL3	0.100454	2.72612	0.813881	0.41646	0.551121	-6.48934
ENSG00000036549	AC118549.1	-0.316617	-0.211091	-1.5165	0.130611	0.233516	-5.35984
ENSG00000037241	RPL26L1	-0.522339	0.0875097	-2.40564	0.0168448	0.0478696	-3.74451
ENSG00000037474	NSUN2	-0.204026	0.833742	-1.66998	0.0961305	0.183118	-5.2945
ENSG00000037637	FBXO42	-0.370741	0.0283784	-3.1485	0.00183303	0.00813061	-1.75129
ENSG00000037749	MFAP3	0.130431	0.977643	0.959687	0.338106	0.472638	-6.20903
ENSG00000037897	METTL1	-0.453836	-0.639117	-2.16688	0.0311543	0.0773865	-4.12731
ENSG00000038210	PI4K2B	1.1488	0.382898	4.66225	5.00921e-06	6.38739e-05	3.7645
ENSG00000038219	BOD1L1	0.289037	2.44016	2.12031	0.0349292	0.0845862	-4.58641
ENSG00000038274	MAT2B	0.621467	1.93147	4.50227	1.01656e-05	0.000115023	2.91418
ENSG00000038358	EDC4	0.153055	1.28885	1.10539	0.270013	0.400604	-6.10217
ENSG00000038382	TRIO	-0.370638	2.62803	-2.61012	0.00957728	0.0306734	-3.48626
ENSG00000038427	VCAN	0.174804	4.30426	0.716396	0.474391	0.605146	-6.58597
ENSG00000038532	CLEC16A	0.0197607	1.11962	0.15599	0.876163	0.920417	-6.67556
ENSG00000038945	MSR1	-1.52311	2.81061	-6.15355	2.85893e-09	1.04234e-07	10.6916
ENSG00000039068	CDH1	-1.10034	0.627402	-4.6753	4.72408e-06	6.10665e-05	3.68486
ENSG00000039123	MTREX	-0.208622	0.806997	-1.37006	0.171853	0.287705	-5.72751
ENSG00000039319	ZFYVE16	0.55956	3.25424	3.38086	0.000833978	0.00430728	-1.2771
ENSG00000039523	RIPOR1	0.0252355	2.5057	0.178828	0.858212	0.908706	-6.79497
ENSG00000039560	RAI14	-0.945215	-0.556066	-4.58543	7.05325e-06	8.50885e-05	3.43761
ENSG00000039650	PNKP	-0.486784	2.50676	-2.68939	0.00762237	0.0256003	-3.2783
ENSG00000040341	STAU2	0.102333	1.80515	0.729946	0.466082	0.597721	-6.50081
ENSG00000040487	SLC66A1	-0.143521	-0.0689369	-0.990265	0.322968	0.457387	-6.00664
ENSG00000040531	CTNS	0.425442	1.29816	2.74628	0.00644956	0.0224821	-3.00732
ENSG00000040633	PHF23	0.135099	2.00722	0.987507	0.324314	0.4587	-6.2947
ENSG00000040933	INPP4A	0.100401	1.89734	0.710303	0.478154	0.60829	-6.51661
ENSG00000041357	PSMA4	0.841769	3.04148	4.37782	1.73972e-05	0.000177102	2.35877
ENSG00000041802	LSG1	-0.0584934	0.177499	-0.370023	0.711667	0.800989	-6.47944
ENSG00000042062	RIPOR3	0.758853	0.416434	4.02423	7.50557e-05	0.000594502	1.21063
ENSG00000042088	TDP1	-0.123012	-0.0676504	-0.700121	0.484479	0.613562	-6.25272
ENSG00000042429	MED17	0.126763	1.22448	1.35265	0.177345	0.294747	-5.79078
ENSG00000042445	RETSAT	-0.216838	0.586851	-1.74532	0.0821132	0.161342	-5.13146
ENSG00000042493	CAPG	-0.466425	4.27151	-3.32469	0.00101296	0.00504378	-1.47035
ENSG00000042753	AP2S1	-0.403868	2.50498	-2.48467	0.0135986	0.0403448	-3.79202
ENSG00000042832	TG	-0.0333787	1.04128	-0.142967	0.886427	0.926653	-6.67758
ENSG00000042980	ADAM28	0.477928	0.558418	2.27214	0.023897	0.0628317	-4.02148
ENSG00000043093	DCUN1D1	0.0912421	1.05504	0.613717	0.53994	0.664562	-6.49046
ENSG00000043143	JADE2	0.0556816	0.553562	0.320408	0.748917	0.828632	-6.55021
ENSG00000043462	LCP2	0.603952	6.91294	4.93202	1.4551e-06	2.28818e-05	4.70882
ENSG00000044115	CTNNA1	-0.312419	4.00433	-2.92067	0.0038001	0.0145811	-2.67656
ENSG00000044446	PHKA2	-0.0797913	1.02849	-0.464683	0.642548	0.748344	-6.5773
ENSG00000044574	HSPA5	-0.222521	3.87048	-1.42085	0.156561	0.268358	-5.84277
ENSG00000046651	OFD1	-0.252212	0.101828	-1.53152	0.126858	0.228174	-5.39
ENSG00000047056	WDR37	0.139364	1.31457	0.975027	0.330455	0.46498	-6.23602
ENSG00000047188	YTHDC2	0.446472	0.538852	3.13551	0.00191305	0.00843732	-1.81471
ENSG00000047249	ATP6V1H	0.332373	2.49568	2.56685	0.0108244	0.0336455	-3.57451
ENSG00000047315	POLR2B	0.104939	1.21258	0.853614	0.394107	0.528698	-6.33248
ENSG00000047346	FAM214A	0.0691682	0.832099	0.46415	0.642929	0.748462	-6.54167
ENSG00000047365	ARAP2	1.01002	2.10209	5.50261	8.97498e-08	2.14441e-06	7.42753
ENSG00000047410	TPR	0.159822	2.11879	1.26534	0.206886	0.329492	-5.99078
ENSG00000047457	CP	-0.430713	0.584048	-1.66566	0.0969886	0.184316	-5.2784
ENSG00000047578	KIAA0556	-0.3273	1.47477	-2.37452	0.0182996	0.0510171	-3.98783
ENSG00000047579	DTNBP1	0.868809	1.54885	5.82713	1.66647e-08	4.85348e-07	9.07168
ENSG00000047621	C12orf4	-0.0469947	0.560782	-0.260081	0.795008	0.86228	-6.57781
ENSG00000047644	WWC3	0.0868774	0.641042	0.687276	0.492523	0.621271	-6.37464
ENSG00000047849	MAP4	-0.233319	1.61217	-2.12062	0.0349025	0.0845632	-4.54466
ENSG00000048052	HDAC9	-0.502072	-0.0899802	-2.39249	0.0174466	0.0490419	-3.74586
ENSG00000048342	CC2D2A	0.438291	3.29208	2.48585	0.0135545	0.0402506	-3.79776
ENSG00000048392	RRM2B	-0.213445	1.19544	-1.27133	0.204748	0.327092	-5.91974
ENSG00000048405	ZNF800	-0.00870429	0.803834	-0.0711462	0.943336	0.965201	-6.64924
ENSG00000048471	SNX29	-0.166476	1.02369	-1.15523	0.249059	0.377655	-6.03038
ENSG00000048649	RSF1	0.352154	2.14972	3.03955	0.00261162	0.0108427	-2.28077
ENSG00000048707	VPS13D	0.311493	1.95904	1.92027	0.0559206	0.120959	-4.95316
ENSG00000048740	CELF2	0.305186	2.70507	2.57161	0.0106803	0.0333132	-3.5707
ENSG00000048828	FAM120A	-0.109482	2.48202	-0.987389	0.324372	0.458715	-6.32772
ENSG00000048991	R3HDM1	-0.159916	1.41659	-0.901459	0.36818	0.503105	-6.33601
ENSG00000049089	COL9A2	-0.518452	0.0568748	-2.19252	0.0292307	0.0734235	-4.20438
ENSG00000049239	H6PD	-0.19051	0.516116	-1.77948	0.0763318	0.152819	-5.05762
ENSG00000049245	VAMP3	0.378278	3.364	2.12687	0.0343752	0.08345	-4.60543
ENSG00000049540	ELN	-0.685096	0.707078	-2.86749	0.00447738	0.0166889	-2.67963
ENSG00000049541	RFC2	-0.216649	0.388692	-1.34901	0.178509	0.296231	-5.69297
ENSG00000049618	ARID1B	-0.160294	1.95462	-1.39813	0.163267	0.277002	-5.81874
ENSG00000049656	CLPTM1L	-0.192845	2.95889	-1.49518	0.136083	0.240805	-5.72484
ENSG00000049759	NEDD4L	-0.846687	1.14803	-4.05048	6.75609e-05	0.00055101	1.13572
ENSG00000049860	HEXB	-0.445609	3.29768	-3.10747	0.00209684	0.0091212	-2.1331
ENSG00000050130	JKAMP	0.0373575	0.78033	0.23623	0.813441	0.875073	-6.60344
ENSG00000050327	ARHGEF5	-1.33259	-0.564999	-7.78196	1.69965e-13	2.11789e-11	20.148
ENSG00000050344	NFE2L3	0.699116	1.77102	3.64003	0.000328975	0.00201771	-0.333602
ENSG00000050405	LIMA1	-0.697989	0.0541496	-3.91423	0.00011596	0.000850883	0.757755
ENSG00000050426	LETMD1	-0.305692	0.565313	-1.93033	0.0546562	0.118903	-4.8033
ENSG00000050438	SLC4A8	-0.873258	-0.106305	-4.52308	9.2815e-06	0.000106799	3.12903
ENSG00000050730	TNIP3	0.796346	3.06683	2.36938	0.0185506	0.0515089	-4.0555
ENSG00000050748	MAPK9	-0.361641	0.411398	-2.10786	0.036003	0.0864212	-4.44478
ENSG00000050820	BCAR1	-2.18392	-0.215721	-9.74369	2.56059e-19	2.10053e-16	33.1421
ENSG00000051009	FAM160A2	-0.0785236	1.59155	-0.495143	0.620918	0.731751	-6.62651
ENSG00000051108	HERPUD1	0.440933	3.16809	2.95101	0.00345711	0.0135262	-2.57583
ENSG00000051128	HOMER3	-0.0252002	1.31327	-0.157193	0.875215	0.919784	-6.70493
ENSG00000051382	PIK3CB	0.0462953	1.47726	0.339615	0.734422	0.817186	-6.67636
ENSG00000051523	CYBA	-0.0664164	6.43494	-0.511357	0.609536	0.722794	-6.69122
ENSG00000051596	THOC3	-0.332213	0.240806	-1.40545	0.161084	0.274344	-5.60948
ENSG00000051620	HEBP2	-0.0748003	1.3348	-0.464435	0.642726	0.748344	-6.61786
ENSG00000051825	MPHOSPH9	-0.255592	0.0601139	-1.18476	0.237196	0.364381	-5.83812
ENSG00000052126	PLEKHA5	-0.666621	-0.237944	-3.32913	0.000997579	0.00497728	-1.1805
ENSG00000052344	PRSS8	-0.568189	-0.159607	-2.71604	0.00705083	0.02405	-2.93681
ENSG00000052723	SIKE1	0.525747	0.230486	2.47275	0.0140496	0.0413713	-3.51638
ENSG00000052749	RRP12	-0.316438	1.95747	-1.99673	0.0468999	0.105989	-4.8242
ENSG00000052795	FNIP2	0.81186	2.96141	4.73669	3.58039e-06	4.80837e-05	3.85881
ENSG00000052802	MSMO1	-0.603218	-0.022496	-3.43198	0.000697153	0.00371966	-0.866628
ENSG00000052841	TTC17	0.243707	1.3608	1.9557	0.0515738	0.113654	-4.82912
ENSG00000053254	FOXN3	-0.0886011	2.85011	-0.65664	0.511994	0.639522	-6.61139
ENSG00000053371	AKR7A2	-0.869861	-0.400221	-4.76795	3.1057e-06	4.28787e-05	4.19184
ENSG00000053501	USE1	-0.373765	0.642126	-2.46579	0.0143189	0.0419633	-3.68178
ENSG00000053524	MCF2L2	0.0300353	0.594754	0.143057	0.886357	0.926653	-6.59364
ENSG00000053770	AP5M1	0.155429	0.620888	1.11063	0.267756	0.398072	-5.99698
ENSG00000053900	ANAPC4	-0.144147	0.366954	-0.92816	0.354188	0.48887	-6.16461
ENSG00000053918	KCNQ1	-0.294475	0.681185	-1.92721	0.0550457	0.119565	-4.82012
ENSG00000054116	TRAPPC3	0.0145946	1.39384	0.103711	0.917479	0.947908	-6.71997
ENSG00000054118	THRAP3	0.141078	2.44875	1.32407	0.186644	0.305915	-5.93702
ENSG00000054148	PHPT1	-0.533151	0.418339	-2.25904	0.0247116	0.0643546	-4.14704
ENSG00000054267	ARID4B	0.869311	3.24864	5.42048	1.35902e-07	3.07545e-06	6.98087
ENSG00000054277	OPN3	-1.15222	0.233247	-6.94237	3.08483e-11	1.97188e-09	15.145
ENSG00000054282	SDCCAG8	-0.0937385	1.69869	-0.676181	0.499528	0.627854	-6.53269
ENSG00000054523	KIF1B	0.431657	2.40113	3.57805	0.000412978	0.00245895	-0.597048
ENSG00000054611	TBC1D22A	-0.0877549	1.27825	-0.818657	0.413734	0.548377	-6.38632
ENSG00000054654	SYNE2	-0.411901	2.35355	-2.65725	0.00836702	0.0274916	-3.35775
ENSG00000054965	FAM168A	0.375188	1.59241	2.633	0.00897139	0.0291563	-3.3388
ENSG00000054967	RELT	-0.252667	2.9961	-1.61284	0.107995	0.200774	-5.54604
ENSG00000054983	GALC	0.497437	3.008	3.81798	0.000168357	0.00114851	0.215166
ENSG00000055044	NOP58	-0.0155022	0.984837	-0.0948884	0.924477	0.952835	-6.6752
ENSG00000055070	SZRD1	0.158904	2.52378	1.37326	0.170859	0.286579	-5.87511
ENSG00000055130	CUL1	0.768643	1.31661	4.53561	8.78544e-06	0.000101746	3.11586
ENSG00000055147	FAM114A2	0.365793	0.502031	2.08636	0.0379233	0.0896966	-4.4401
ENSG00000055163	CYFIP2	-0.231001	3.22005	-1.45218	0.147661	0.256429	-5.79269
ENSG00000055208	TAB2	0.519994	3.03391	4.18656	3.88238e-05	0.000347754	1.5915
ENSG00000055211	GINM1	-0.227304	0.00296791	-1.41702	0.157677	0.269748	-5.52819
ENSG00000055332	EIF2AK2	1.85991	2.95935	8.10604	2.07683e-14	3.35152e-12	22.2052
ENSG00000055483	AC022966.1	-0.25294	2.11309	-1.77409	0.0772207	0.154316	-5.24614
ENSG00000055609	KMT2C	0.0546634	2.76668	0.509877	0.610571	0.723367	-6.69021
ENSG00000055917	PUM2	0.436425	2.19312	3.87005	0.000137731	0.000978931	0.436628
ENSG00000055950	MRPL43	-0.308408	0.105063	-1.77321	0.0773677	0.154453	-5.0071
ENSG00000055955	ITIH4	0.430815	0.396	1.91207	0.0569687	0.122578	-4.74081
ENSG00000056097	ZFR	-0.0279554	1.48868	-0.280333	0.779445	0.84999	-6.69804
ENSG00000056558	TRAF1	1.07756	2.19554	4.15774	4.37102e-05	0.000383155	1.54029
ENSG00000056586	RC3H2	-0.208962	1.57032	-1.4229	0.155966	0.267572	-5.75913
ENSG00000056972	TRAF3IP2	-0.255397	1.08268	-1.62204	0.106009	0.198167	-5.40655
ENSG00000057019	DCBLD2	-0.450476	-0.399694	-1.91812	0.0561942	0.12139	-4.67937
ENSG00000057149	SERPINB3	-0.443687	0.711896	-1.28212	0.200944	0.32303	-5.86464
ENSG00000057252	SOAT1	-0.201509	1.91439	-1.17826	0.239772	0.367193	-6.09416
ENSG00000057608	GDI2	0.150012	3.24601	1.38226	0.168082	0.28274	-5.88584
ENSG00000057657	PRDM1	1.10769	2.15032	5.99049	6.95559e-09	2.32894e-07	9.89007
ENSG00000057663	ATG5	0.103969	0.431491	0.66711	0.505295	0.633001	-6.35231
ENSG00000057704	TMCC3	-0.160206	1.88496	-0.803927	0.422175	0.556941	-6.45291
ENSG00000057757	PITHD1	-0.340171	0.153184	-2.69812	0.00743076	0.0250852	-3.02631
ENSG00000058063	ATP11B	0.613995	3.76478	4.16958	4.16362e-05	0.000367593	1.51273
ENSG00000058091	CDK14	0.0952437	1.26619	0.564327	0.57302	0.692463	-6.55091
ENSG00000058262	SEC61A1	0.0693248	2.27093	0.569754	0.569337	0.689283	-6.63252
ENSG00000058272	PPP1R12A	0.372729	3.82988	2.99654	0.00299521	0.0121137	-2.45789
ENSG00000058453	CROCC	-0.846572	1.45073	-4.58346	7.11503e-06	8.56239e-05	3.23654
ENSG00000058600	POLR3E	-0.354002	0.500746	-2.18138	0.0300533	0.075202	-4.29358
ENSG00000058668	ATP2B4	-0.0419328	1.68428	-0.28677	0.774518	0.846304	-6.71083
ENSG00000058673	ZC3H11A	0.521431	2.39919	4.17832	4.01655e-05	0.000356207	1.58431
ENSG00000058799	YIPF1	0.606861	1.2704	4.29822	2.43808e-05	0.00023324	2.15385
ENSG00000059122	FLYWCH1	-0.590422	0.409397	-3.31788	0.00103691	0.00513705	-1.30593
ENSG00000059145	UNKL	0.0863305	1.37109	0.498622	0.618468	0.729563	-6.59533
ENSG00000059377	TBXAS1	0.099804	3.90569	0.646235	0.518698	0.645113	-6.63283
ENSG00000059378	PARP12	1.60766	3.37125	6.48316	4.50617e-10	1.96278e-08	12.4987
ENSG00000059728	MXD1	0.655907	6.29014	4.54448	8.44964e-06	9.84358e-05	3.02682
ENSG00000059758	CDK17	0.659635	2.20822	4.20874	3.54238e-05	0.000324686	1.71867
ENSG00000059804	SLC2A3	0.159571	6.16021	0.990071	0.323062	0.457389	-6.3415
ENSG00000059915	PSD	0.278245	0.520068	1.28515	0.199885	0.321882	-5.75285
ENSG00000060069	CTDP1	0.160988	2.13507	1.12337	0.262318	0.392501	-6.15874
ENSG00000060138	YBX3	-0.350841	3.66914	-2.6772	0.00789737	0.0262819	-3.33131
ENSG00000060237	WNK1	-0.284665	3.71137	-2.89713	0.00408745	0.0154996	-2.74115
ENSG00000060339	CCAR1	0.017662	1.58218	0.129416	0.897129	0.934335	-6.73745
ENSG00000060491	OGFR	0.605945	3.02372	4.15259	4.46414e-05	0.000390201	1.46244
ENSG00000060558	GNA15	0.0359827	2.48141	0.276018	0.782754	0.852843	-6.76863
ENSG00000060642	PIGV	0.378701	-0.229218	1.92438	0.0554007	0.120147	-4.60345
ENSG00000060656	PTPRU	-0.675586	-0.516333	-2.8126	0.00529011	0.0190894	-2.64489
ENSG00000060688	SNRNP40	-0.559529	0.0969027	-3.23408	0.00137858	0.00647461	-1.51079
ENSG00000060762	MPC1	-0.259994	0.264281	-1.41324	0.158783	0.27113	-5.59498
ENSG00000060971	ACAA1	-0.0918972	2.94605	-0.715289	0.475074	0.605663	-6.57396
ENSG00000060982	BCAT1	-0.116312	1.93188	-0.773283	0.440059	0.573691	-6.48337
ENSG00000061273	HDAC7	-0.28559	2.45959	-2.47922	0.013803	0.0407823	-3.80053
ENSG00000061936	SFSWAP	-0.0642682	1.51131	-0.520022	0.603492	0.717398	-6.60453
ENSG00000061938	TNK2	0.435768	2.34632	2.63783	0.00884787	0.028833	-3.38362
ENSG00000061987	MON2	0.0933426	1.45626	0.76051	0.44764	0.580347	-6.43699
ENSG00000062038	CDH3	-0.62268	-0.655467	-2.94954	0.00347305	0.013567	-2.21295
ENSG00000062194	GPBP1	0.804201	3.03066	5.60036	5.44467e-08	1.39576e-06	7.86364
ENSG00000062282	DGAT2	-0.0138578	3.57428	-0.0689317	0.945097	0.966099	-6.83496
ENSG00000062485	CS	-0.478901	2.20011	-5.14088	5.38924e-07	9.78813e-06	5.66621
ENSG00000062582	MRPS24	-0.15088	0.991253	-0.823923	0.41074	0.545217	-6.35584
ENSG00000062598	ELMO2	0.549211	2.28726	3.45978	0.000631865	0.00345177	-0.978807
ENSG00000062650	WAPL	0.158195	1.33342	1.25329	0.21123	0.335054	-5.93353
ENSG00000062716	VMP1	0.256277	5.36151	1.98493	0.0482059	0.108022	-4.89682
ENSG00000062725	APPBP2	0.0121549	0.633185	0.0904783	0.927977	0.955545	-6.61826
ENSG00000062822	POLD1	-0.368974	-0.0373822	-2.15884	0.0317798	0.0785046	-4.25681
ENSG00000063015	SEZ6	0.380004	-0.329197	1.55365	0.121488	0.21988	-5.20647
ENSG00000063046	EIF4B	-0.415519	2.93575	-3.77798	0.000196149	0.00129939	0.0606822
ENSG00000063169	BICRA	-0.194747	0.152113	-1.25445	0.210809	0.334548	-5.75876
ENSG00000063177	RPL18	-0.270978	4.2829	-1.76607	0.0785601	0.156358	-5.30293
ENSG00000063241	ISOC2	-0.595984	0.239832	-2.9525	0.00344099	0.0134845	-2.38159
ENSG00000063244	U2AF2	-0.317723	2.84829	-2.28384	0.0231894	0.0613812	-4.26521
ENSG00000063245	EPN1	-0.169268	2.14083	-1.32449	0.186505	0.305754	-5.92901
ENSG00000063322	MED29	0.00797612	1.46283	0.0658026	0.947586	0.967297	-6.72361
ENSG00000063601	MTMR1	0.155874	0.64863	1.02592	0.305887	0.440254	-6.0908
ENSG00000063854	HAGH	-0.670221	0.87668	-4.5814	7.18033e-06	8.6094e-05	3.27185
ENSG00000063978	RNF4	-0.051789	1.79669	-0.40293	0.687332	0.782298	-6.68766
ENSG00000064012	CASP8	0.433632	2.52275	3.08383	0.00226432	0.00970396	-2.16798
ENSG00000064115	TM7SF3	-0.0538248	1.35509	-0.29051	0.771658	0.844361	-6.68464
ENSG00000064225	ST3GAL6	0.382937	2.2448	2.17296	0.0306884	0.0763642	-4.46485
ENSG00000064270	ATP2C2	-1.09473	0.582341	-4.61634	6.14918e-06	7.54769e-05	3.43763
ENSG00000064313	TAF2	-0.013589	1.01441	-0.0976512	0.922285	0.951609	-6.67724
ENSG00000064393	HIPK2	-0.432912	1.50451	-3.14501	0.00185423	0.00820731	-1.94651
ENSG00000064419	TNPO3	0.306609	0.929382	2.45724	0.0146562	0.0428117	-3.69329
ENSG00000064490	RFXANK	0.0392767	1.24485	0.248442	0.803989	0.86908	-6.67658
ENSG00000064547	LPAR2	0.138688	3.09581	0.737084	0.461737	0.593386	-6.55813
ENSG00000064601	CTSA	-0.0584073	4.04473	-0.41496	0.678514	0.776482	-6.75582
ENSG00000064607	SUGP2	-0.417032	0.711526	-3.54306	0.000468904	0.00272646	-0.606204
ENSG00000064666	CNN2	0.0836936	5.19318	0.803271	0.422553	0.557141	-6.51846
ENSG00000064687	ABCA7	-0.326985	2.21498	-2.33875	0.0201083	0.054772	-4.12109
ENSG00000064726	BTBD1	-0.44332	1.66329	-2.60514	0.00971383	0.030966	-3.45456
ENSG00000064763	FAR2	0.371723	1.97083	2.70011	0.00738774	0.0249838	-3.20395
ENSG00000064886	CHI3L2	0.367736	-0.152895	1.72172	0.0863118	0.168182	-4.97625
ENSG00000064932	SBNO2	0.335078	5.11082	2.70564	0.00726913	0.0246664	-3.25742
ENSG00000064961	HMG20B	-0.612607	0.993198	-4.51453	9.63555e-06	0.000110422	2.98652
ENSG00000064995	TAF11	0.0592119	0.0173255	0.493281	0.622232	0.732787	-6.36952
ENSG00000064999	ANKS1A	-0.199217	0.826357	-1.66762	0.0965981	0.183751	-5.28986
ENSG00000065000	AP3D1	-0.0308782	2.72457	-0.336277	0.736934	0.818963	-6.76348
ENSG00000065029	ZNF76	-0.309273	0.209724	-2.21943	0.0273225	0.0695353	-4.16566
ENSG00000065054	SLC9A3R2	-1.12584	0.118628	-4.80912	2.57237e-06	3.64877e-05	4.30458
ENSG00000065135	GNAI3	0.40022	1.37211	3.2318	0.00138919	0.00651822	-1.62868
ENSG00000065150	IPO5	-0.555566	0.628471	-3.46779	0.000614144	0.00337706	-0.852385
ENSG00000065154	OAT	-0.269504	1.23205	-1.80163	0.0727645	0.147477	-5.1288
ENSG00000065243	PKN2	0.189125	1.44993	1.2621	0.208047	0.330805	-5.93254
ENSG00000065268	WDR18	-0.615153	-0.0638956	-3.1078	0.00209456	0.00911625	-1.8833
ENSG00000065357	DGKA	0.14331	3.25155	0.937912	0.349162	0.483732	-6.39467
ENSG00000065361	ERBB3	-0.515105	1.21459	-1.93751	0.0537681	0.117621	-4.89259
ENSG00000065413	ANKRD44	0.431146	3.13223	2.49792	0.0131123	0.0392453	-3.76477
ENSG00000065427	KARS1	0.540508	2.00326	3.30702	0.00107626	0.00530357	-1.45083
ENSG00000065457	ADAT1	0.315628	1.91022	1.77458	0.0771396	0.154215	-5.21023
ENSG00000065518	NDUFB4	-0.324813	1.90637	-1.80609	0.0720633	0.14624	-5.17296
ENSG00000065526	SPEN	-0.140207	1.52431	-1.28751	0.199065	0.321192	-5.92494
ENSG00000065548	ZC3H15	0.137941	1.66393	1.14917	0.251543	0.380542	-6.09534
ENSG00000065559	MAP2K4	0.0787897	1.22927	0.504185	0.614559	0.726693	-6.57868
ENSG00000065600	PACC1	0.118932	-0.374206	0.629482	0.529588	0.654603	-6.19669
ENSG00000065613	SLK	0.406335	2.10294	2.73219	0.00672369	0.0232656	-3.12364
ENSG00000065615	CYB5R4	0.587239	2.86176	3.92294	0.000112075	0.000829524	0.602537
ENSG00000065621	GSTO2	-0.0698847	0.462372	-0.41691	0.677089	0.775031	-6.50994
ENSG00000065665	SEC61A2	-0.249218	-0.200247	-1.12548	0.261426	0.391463	-5.84694
ENSG00000065717	TLE2	-1.00288	-0.817724	-4.50863	9.88708e-06	0.000112391	3.14065
ENSG00000065802	ASB1	-0.179062	0.135401	-1.10816	0.268821	0.399257	-5.93284
ENSG00000065809	FAM107B	-0.0193923	4.04595	-0.1506	0.880408	0.922888	-6.82989
ENSG00000065882	TBC1D1	0.0198749	2.79279	0.18431	0.853914	0.905966	-6.80379
ENSG00000065883	CDK13	0.00344352	1.8616	0.0358634	0.971419	0.981979	-6.7711
ENSG00000065911	MTHFD2	0.720941	2.75071	4.89252	1.74953e-06	2.62938e-05	4.54653
ENSG00000065923	SLC9A7	-0.211114	-0.47853	-1.05715	0.291428	0.424821	-5.86561
ENSG00000065970	FOXJ2	-0.231158	-0.0794336	-1.96647	0.050311	0.111696	-4.60863
ENSG00000065978	YBX1	-0.957131	4.24699	-6.15517	2.83356e-09	1.04081e-07	10.6962
ENSG00000065989	PDE4A	0.034226	1.35698	0.251814	0.801385	0.867095	-6.68328
ENSG00000066027	PPP2R5A	0.302865	1.45161	2.19422	0.0291069	0.0731687	-4.35072
ENSG00000066044	ELAVL1	-0.316968	0.539201	-2.08845	0.0377322	0.0893733	-4.49588
ENSG00000066084	DIP2B	0.648612	2.08703	4.85213	2.10994e-06	3.08621e-05	4.40129
ENSG00000066117	SMARCD1	-0.0917952	0.852503	-0.695755	0.487205	0.616129	-6.41584
ENSG00000066135	KDM4A	-0.00342615	0.106224	-0.0232041	0.981505	0.988307	-6.49689
ENSG00000066136	NFYC	0.227285	2.50117	2.12299	0.0347019	0.0841185	-4.58662
ENSG00000066294	CD84	0.926255	1.15013	4.02166	7.58315e-05	0.000598145	1.11589
ENSG00000066322	ELOVL1	0.00539385	1.97517	0.0465647	0.962896	0.978098	-6.77322
ENSG00000066336	SPI1	0.086813	6.2287	0.821498	0.412117	0.54675	-6.4913
ENSG00000066379	ZNRD1	0.289425	-0.135944	1.42275	0.156011	0.267602	-5.46006
ENSG00000066422	ZBTB11	-0.0197156	0.109924	-0.153712	0.877956	0.92119	-6.51174
ENSG00000066427	ATXN3	-0.176419	1.34513	-1.13303	0.258249	0.38778	-6.0988
ENSG00000066455	GOLGA5	0.450594	0.346021	2.66937	0.00807881	0.0267298	-3.07558
ENSG00000066629	EML1	-0.993665	-0.268747	-4.64696	5.36415e-06	6.77852e-05	3.65523
ENSG00000066654	THUMPD1	-0.323377	0.34219	-2.31019	0.0216631	0.0580277	-3.98783
ENSG00000066739	ATG2B	-0.0610301	-0.0902425	-0.332891	0.739486	0.820965	-6.41184
ENSG00000066777	ARFGEF1	0.16389	1.85473	1.50381	0.133848	0.237877	-5.64947
ENSG00000066827	ZFAT	0.154136	0.0668432	0.889604	0.374503	0.509693	-6.11624
ENSG00000066855	MTFR1	-0.0544752	0.800414	-0.265574	0.790778	0.858696	-6.61672
ENSG00000066923	STAG3	-0.225096	1.12335	-1.39033	0.16562	0.279602	-5.75705
ENSG00000066933	MYO9A	-0.346123	0.379501	-2.02062	0.044347	0.101265	-4.6027
ENSG00000067048	DDX3Y	0.258858	0.98519	1.34219	0.180707	0.29857	-5.72581
ENSG00000067057	PFKP	-0.0144919	1.71128	-0.0885202	0.929532	0.956345	-6.75851
ENSG00000067064	IDI1	0.709042	2.54304	3.94159	0.000104163	0.000776804	0.691511
ENSG00000067066	SP100	1.08425	4.92591	9.1045	2.38856e-17	1.11967e-14	28.7973
ENSG00000067082	KLF6	0.458873	5.65407	3.91627	0.000115039	0.000846374	0.556058
ENSG00000067167	TRAM1	0.118581	2.22234	0.832995	0.405614	0.54016	-6.44649
ENSG00000067182	TNFRSF1A	0.161359	5.14478	1.34916	0.178463	0.296204	-5.93885
ENSG00000067208	EVI5	-0.719763	0.950519	-3.89035	0.000127286	0.000918624	0.562323
ENSG00000067225	PKM	-0.28446	5.53125	-2.34603	0.019728	0.0539152	-4.13039
ENSG00000067334	DNTTIP2	0.253717	2.5099	1.7465	0.0819074	0.16113	-5.30004
ENSG00000067365	METTL22	-0.269797	2.077	-1.69265	0.0917221	0.176661	-5.38253
ENSG00000067369	TP53BP1	-0.183974	1.22159	-1.32038	0.187873	0.307418	-5.85555
ENSG00000067560	RHOA	0.0735568	5.76384	0.632901	0.527356	0.652665	-6.63264
ENSG00000067596	DHX8	0.212968	1.59883	1.76999	0.0779039	0.155334	-5.19394
ENSG00000067606	PRKCZ	-1.01983	0.00602775	-4.81144	2.54515e-06	3.61536e-05	4.32948
ENSG00000067704	IARS2	-0.665122	-0.129933	-4.13776	4.74348e-05	0.00041177	1.61453
ENSG00000067798	NAV3	-0.422275	-0.393352	-1.43527	0.152416	0.262764	-5.45493
ENSG00000067829	IDH3G	-0.00777074	1.47965	-0.0530582	0.957726	0.974254	-6.72748
ENSG00000067836	ROGDI	-0.626453	0.480453	-3.75621	0.000213037	0.00139252	0.14128
ENSG00000067900	ROCK1	0.125356	2.76131	1.0739	0.283864	0.415906	-6.24584
ENSG00000067955	CBFB	-0.0695376	2.26395	-0.551395	0.581838	0.699171	-6.64983
ENSG00000068024	HDAC4	0.312782	3.5101	2.42313	0.0160725	0.0461141	-3.95309
ENSG00000068028	RASSF1	-0.111242	-0.251782	-0.747363	0.455521	0.587392	-6.18051
ENSG00000068079	IFI35	1.42493	2.9899	6.09831	3.87108e-09	1.35131e-07	10.4268
ENSG00000068097	HEATR6	0.00251919	0.710152	0.0147619	0.988233	0.992201	-6.62734
ENSG00000068120	COASY	-0.148832	1.11161	-1.19504	0.233164	0.360052	-5.99259
ENSG00000068305	MEF2A	0.586822	2.50488	4.5647	7.73003e-06	9.1022e-05	3.14153
ENSG00000068308	OTUD5	0.529074	2.23548	4.74323	3.47558e-06	4.71262e-05	3.91068
ENSG00000068323	TFE3	0.242658	3.22584	1.8747	0.0619583	0.130458	-5.09697
ENSG00000068366	ACSL4	0.360706	3.04498	2.52777	0.0120735	0.0367583	-3.69058
ENSG00000068383	INPP5A	0.18259	1.44146	1.07078	0.285263	0.417689	-6.14654
ENSG00000068400	GRIPAP1	0.424277	3.11289	3.33999	0.000960933	0.00482864	-1.40568
ENSG00000068438	FTSJ1	-0.251129	-0.0658689	-1.38605	0.166921	0.281317	-5.5608
ENSG00000068650	ATP11A	0.0705888	3.40147	0.569338	0.569619	0.689436	-6.67355
ENSG00000068654	POLR1A	-0.482739	-0.210761	-2.58594	0.0102572	0.0322799	-3.2541
ENSG00000068697	LAPTM4A	-0.00785203	3.00767	-0.059404	0.952676	0.970818	-6.82487
ENSG00000068724	TTC7A	-0.249525	1.50581	-1.81281	0.0710165	0.144619	-5.1289
ENSG00000068745	IP6K2	0.283328	2.08916	2.49231	0.0133163	0.0396748	-3.73502
ENSG00000068784	SRBD1	0.787206	0.761109	3.74437	0.000222794	0.00144573	0.158287
ENSG00000068796	KIF2A	0.151152	0.655354	0.935349	0.350478	0.484974	-6.17611
ENSG00000068831	RASGRP2	-0.0404692	2.40752	-0.270972	0.786628	0.855364	-6.77036
ENSG00000068878	PSME4	-0.493262	1.12605	-3.74181	0.000224962	0.00145885	0.0243965
ENSG00000068885	IFT80	-0.0718265	0.450504	-0.373763	0.708886	0.799161	-6.52576
ENSG00000068903	SIRT2	-0.243851	1.81446	-2.06508	0.0399089	0.0934063	-4.67941
ENSG00000068912	ERLEC1	0.183472	0.563316	1.15781	0.248005	0.376462	-5.92817
ENSG00000068971	PPP2R5B	-0.492352	0.109252	-3.23874	0.00135712	0.00639489	-1.50469
ENSG00000068976	PYGM	-0.1914	-0.234843	-0.835228	0.404358	0.539469	-6.1167
ENSG00000069011	PITX1	-1.11036	-0.438403	-5.26644	2.92265e-07	5.88356e-06	6.42295
ENSG00000069020	MAST4	-0.428274	0.321403	-2.04512	0.0418519	0.0966433	-4.54955
ENSG00000069248	NUP133	-0.166966	0.586179	-1.01437	0.311349	0.445742	-6.11921
ENSG00000069275	NUCKS1	-0.634471	0.338958	-3.15433	0.00179815	0.00802764	-1.79799
ENSG00000069329	VPS35	-0.0368093	2.3655	-0.325276	0.745235	0.825578	-6.75144
ENSG00000069345	DNAJA2	-0.155573	1.78483	-1.70513	0.0893681	0.173041	-5.33907
ENSG00000069399	BCL3	0.37952	5.3763	2.79931	0.00550593	0.0197092	-3.00687
ENSG00000069424	KCNAB2	-0.373145	3.2369	-2.54901	0.0113794	0.0350784	-3.65225
ENSG00000069493	CLEC2D	0.928867	1.08673	4.7363	3.58666e-06	4.81023e-05	3.98869
ENSG00000069667	RORA	-0.397213	-0.047141	-2.02691	0.0436942	0.100068	-4.52357
ENSG00000069849	ATP1B3	0.140244	3.23299	0.930869	0.352787	0.487552	-6.40041
ENSG00000069869	NEDD4	-0.472687	3.33536	-1.59891	0.111058	0.20519	-5.57571
ENSG00000069943	PIGB	0.276977	1.54298	1.60943	0.108739	0.201664	-5.45168
ENSG00000069956	MAPK6	0.217755	2.33575	1.62479	0.105421	0.197181	-5.49192
ENSG00000069974	RAB27A	0.515767	3.10509	3.14949	0.00182708	0.00811267	-1.99255
ENSG00000070010	UFD1	-0.0802465	1.638	-0.647172	0.518093	0.644758	-6.54827
ENSG00000070047	PHRF1	0.168281	0.877208	1.30201	0.194069	0.31499	-5.80722
ENSG00000070081	NUCB2	-0.221136	2.13851	-1.31747	0.188845	0.308546	-5.94151
ENSG00000070087	PFN2	-0.581278	0.426602	-2.96166	0.00334351	0.0131971	-2.3773
ENSG00000070190	DAPP1	1.52382	2.3158	7.10621	1.15122e-11	8.21445e-10	16.0788
ENSG00000070214	SLC44A1	0.129347	0.135713	0.740892	0.459429	0.591115	-6.24785
ENSG00000070269	TMEM260	0.297028	1.33901	1.88036	0.0611797	0.129405	-4.95426
ENSG00000070366	SMG6	-0.0610346	1.03222	-0.359118	0.719799	0.806186	-6.6245
ENSG00000070367	EXOC5	-0.0429308	1.36453	-0.347764	0.7283	0.812285	-6.66441
ENSG00000070413	DGCR2	0.388178	1.50973	2.82884	0.00503663	0.0183836	-2.80944
ENSG00000070423	RNF126	-0.651893	0.292717	-4.40424	1.55367e-05	0.000163576	2.61084
ENSG00000070444	MNT	-0.301176	2.16462	-2.0262	0.0437673	0.100197	-4.78055
ENSG00000070476	ZXDC	-0.153175	0.806082	-1.48306	0.139273	0.245479	-5.57251
ENSG00000070495	JMJD6	0.252908	2.84969	1.95241	0.0519653	0.114389	-4.94033
ENSG00000070501	POLB	0.430849	1.50529	2.47203	0.014077	0.0414272	-3.72165
ENSG00000070526	ST6GALNAC1	-0.565692	0.180298	-2.35492	0.0192723	0.0530067	-3.87023
ENSG00000070540	WIPI1	-0.0510819	1.97427	-0.378282	0.705531	0.796405	-6.70841
ENSG00000070610	GBA2	0.0209155	1.82013	0.185981	0.852605	0.905399	-6.74984
ENSG00000070614	NDST1	-0.358797	1.80654	-2.19867	0.0287845	0.0725062	-4.40568
ENSG00000070669	ASNS	-0.0499681	-0.297642	-0.255855	0.798265	0.864598	-6.42017
ENSG00000070729	CNGB1	0.206776	0.0725476	0.752011	0.452726	0.585309	-6.20815
ENSG00000070731	ST6GALNAC2	-0.223056	1.31788	-1.39672	0.163693	0.277348	-5.76428
ENSG00000070756	PABPC1	-0.408686	5.01676	-3.73599	0.000229953	0.00148827	-0.0924869
ENSG00000070761	CFAP20	-0.103458	-0.225464	-0.481948	0.630249	0.739005	-6.34258
ENSG00000070770	CSNK2A2	-0.120004	0.876709	-0.988636	0.323763	0.458117	-6.18203
ENSG00000070814	TCOF1	0.149419	0.447697	0.947544	0.344244	0.478973	-6.1286
ENSG00000070831	CDC42	0.0276144	4.65808	0.343841	0.731245	0.814572	-6.78246
ENSG00000070882	OSBPL3	-0.166893	1.20449	-1.16575	0.244788	0.372614	-6.03628
ENSG00000070961	ATP2B1	-0.0210922	3.76716	-0.108429	0.913739	0.945731	-6.83381
ENSG00000071051	NCK2	-0.00864142	0.932654	-0.0623721	0.950315	0.968992	-6.66229
ENSG00000071054	MAP4K4	0.32183	4.23447	2.20865	0.0280737	0.0709884	-4.44256
ENSG00000071073	MGAT4A	0.64986	1.43666	3.81827	0.000168168	0.00114851	0.323922
ENSG00000071082	RPL31	-0.363307	4.4647	-2.10206	0.0365126	0.087304	-4.66653
ENSG00000071127	WDR1	-0.185033	5.24776	-2.21018	0.0279662	0.0708437	-4.435
ENSG00000071189	SNX13	0.28477	1.83606	2.47225	0.0140688	0.0414153	-3.76369
ENSG00000071205	ARHGAP10	-0.207705	-0.267629	-1.26043	0.208649	0.331548	-5.68961
ENSG00000071243	ING3	0.664692	0.312493	4.03399	7.21819e-05	0.000577221	1.26055
ENSG00000071246	VASH1	0.186503	0.512307	0.903489	0.367105	0.501984	-6.16042
ENSG00000071462	BUD23	-0.373968	1.17345	-2.45388	0.0147903	0.0431139	-3.77668
ENSG00000071537	SEL1L	-0.0906589	2.35457	-0.646757	0.518361	0.644866	-6.59766
ENSG00000071553	ATP6AP1	-0.0350275	3.72307	-0.243742	0.807624	0.871929	-6.80943
ENSG00000071564	TCF3	0.197741	1.20258	1.07374	0.283938	0.415936	-6.1176
ENSG00000071575	TRIB2	0.598183	-0.152708	2.28988	0.0228315	0.060564	-3.84398
ENSG00000071626	DAZAP1	-0.259553	1.94374	-1.85246	0.0650954	0.13539	-5.09553
ENSG00000071655	MBD3	-0.705624	0.546922	-4.02419	7.50677e-05	0.000594502	1.10307
ENSG00000071859	FAM50A	0.153418	2.66364	1.05172	0.293909	0.427371	-6.26671
ENSG00000071889	FAM3A	-0.522148	0.311312	-3.5172	0.000514713	0.002917	-0.650692
ENSG00000071894	CPSF1	-0.357423	1.17289	-2.50827	0.0127433	0.0383624	-3.63821
ENSG00000071994	PDCD2	-0.356824	0.235595	-2.32562	0.0208104	0.0562796	-3.94168
ENSG00000072042	RDH11	-0.43106	0.352025	-2.61521	0.00943934	0.0303168	-3.27082
ENSG00000072062	PRKACA	-0.390043	2.47	-3.63565	0.00033434	0.00204298	-0.422336
ENSG00000072071	ADGRL1	-0.441946	-0.0939573	-2.52385	0.0122056	0.0370382	-3.4194
ENSG00000072080	SPP2	-0.40212	-0.491209	-1.1806	0.238842	0.366136	-5.7549
ENSG00000072110	ACTN1	-0.246804	4.80668	-2.40042	0.0170815	0.0483746	-4.01184
ENSG00000072121	ZFYVE26	0.512236	1.66862	3.61388	0.000362243	0.00220119	-0.422981
ENSG00000072134	EPN2	-0.519014	0.56663	-2.35849	0.0190915	0.0527025	-3.92772
ENSG00000072135	PTPN18	-0.27998	2.01458	-2.24871	0.0253707	0.0656716	-4.31078
ENSG00000072210	ALDH3A2	-0.961203	0.977334	-5.89953	1.13383e-08	3.49888e-07	9.41904
ENSG00000072274	TFRC	-0.785079	3.73219	-4.26134	2.84601e-05	0.000267192	1.86717
ENSG00000072310	SREBF1	-0.0380863	2.76073	-0.328672	0.742669	0.823478	-6.76654
ENSG00000072364	AFF4	0.0990027	2.78318	1.01723	0.30999	0.444312	-6.30652
ENSG00000072401	UBE2D1	0.616058	2.89877	4.31696	2.25278e-05	0.000218057	2.112
ENSG00000072415	MPP5	0.0900283	0.0445666	0.577182	0.564317	0.685805	-6.34087
ENSG00000072501	SMC1A	-0.101319	1.13955	-0.664149	0.507185	0.634884	-6.48161
ENSG00000072506	HSD17B10	-0.403062	0.285096	-2.35149	0.0194467	0.0533537	-3.88798
ENSG00000072518	MARK2	0.277081	2.98318	2.84427	0.00480618	0.0176868	-2.87027
ENSG00000072609	CHFR	0.136041	2.92415	1.35464	0.17671	0.29389	-5.91589
ENSG00000072682	P4HA2	-0.753515	0.882967	-3.49069	0.000566021	0.00315332	-0.823864
ENSG00000072694	FCGR2B	0.858932	2.17585	4.33686	2.07087e-05	0.000202842	2.23686
ENSG00000072736	NFATC3	0.356482	0.718643	3.1688	0.00171415	0.00773688	-1.74466
ENSG00000072756	TRNT1	0.220645	0.618274	1.27215	0.204458	0.326895	-5.8015
ENSG00000072778	ACADVL	-0.601089	3.881	-4.58092	7.19552e-06	8.61712e-05	3.16939
ENSG00000072786	STK10	-0.0585943	4.69555	-0.434999	0.663925	0.764496	-6.74687
ENSG00000072803	FBXW11	0.181453	1.65772	1.33196	0.184042	0.303063	-5.86852
ENSG00000072818	ACAP1	0.18204	3.18641	1.13379	0.257931	0.387426	-6.19159
ENSG00000072849	DERL2	0.159063	1.49856	1.1425	0.254299	0.38371	-6.08201
ENSG00000072858	SIDT1	-0.243102	-0.298852	-1.08787	0.277663	0.409179	-5.89222
ENSG00000072864	NDE1	-0.145008	2.3308	-1.30407	0.193365	0.314159	-5.96605
ENSG00000072952	MRVI1	0.126614	0.596684	0.634199	0.52651	0.651945	-6.38153
ENSG00000072958	AP1M1	-0.219265	2.10528	-1.66948	0.0962289	0.183192	-5.41806
ENSG00000073008	PVR	-0.998866	-0.111169	-6.69639	1.31712e-10	6.64911e-09	13.7601
ENSG00000073050	XRCC1	-0.438561	0.312547	-3.02154	0.00276642	0.0113611	-2.16621
ENSG00000073060	SCARB1	-1.09432	0.0263771	-6.77913	8.11448e-11	4.38895e-09	14.2215
ENSG00000073169	SELENOO	0.0729847	0.163037	0.472936	0.636657	0.74371	-6.40068
ENSG00000073331	ALPK1	0.199931	3.28469	1.32012	0.18796	0.307509	-5.9693
ENSG00000073350	LLGL2	-1.23505	0.703976	-5.75706	2.41122e-08	6.82069e-07	8.71484
ENSG00000073417	PDE8A	-0.644927	0.989437	-3.88141	0.000131791	0.000944215	0.524707
ENSG00000073578	SDHA	-0.40704	1.84626	-3.4687	0.000612174	0.00337038	-0.954831
ENSG00000073584	SMARCE1	-0.0188567	1.55323	-0.16023	0.872825	0.918165	-6.72919
ENSG00000073614	KDM5A	0.309689	2.59933	2.69426	0.00751485	0.0253083	-3.25473
ENSG00000073737	DHRS9	0.115188	1.26271	0.541599	0.588559	0.705268	-6.55134
ENSG00000073756	PTGS2	-0.14807	4.94688	-0.475259	0.635002	0.742698	-6.72734
ENSG00000073792	IGF2BP2	-0.310124	0.849048	-1.40285	0.161856	0.275295	-5.7068
ENSG00000073803	MAP3K13	-0.0746814	1.20548	-0.492766	0.622595	0.733113	-6.58656
ENSG00000073849	ST6GAL1	0.125655	1.28306	0.768013	0.443178	0.576611	-6.41061
ENSG00000073910	FRY	-0.456779	0.447056	-2.80101	0.00547786	0.0196301	-2.81166
ENSG00000073921	PICALM	0.375143	5.47112	3.18793	0.00160871	0.00732817	-1.89015
ENSG00000073969	NSF	0.307675	1.46388	2.21738	0.0274642	0.0698417	-4.3032
ENSG00000074054	CLASP1	0.266233	1.68262	2.12048	0.0349146	0.0845717	-4.52863
ENSG00000074071	MRPS34	-0.452743	-0.0934566	-2.22098	0.0272162	0.0693365	-4.11152
ENSG00000074201	CLNS1A	-0.0842454	1.41792	-0.524035	0.600701	0.714944	-6.59499
ENSG00000074319	TSG101	0.361018	2.25673	3.04343	0.00257934	0.0107361	-2.275
ENSG00000074356	NCBP3	-0.483181	0.896758	-3.48877	0.000569909	0.00317139	-0.812509
ENSG00000074370	ATP2A3	0.158545	2.71258	1.03655	0.300912	0.435038	-6.28375
ENSG00000074416	MGLL	-0.0950985	2.2607	-0.417594	0.676589	0.774639	-6.71773
ENSG00000074603	DPP8	0.331501	1.09727	2.56564	0.0108613	0.033707	-3.44808
ENSG00000074621	SLC24A1	0.424583	0.18281	2.15826	0.0318254	0.0785974	-4.22829
ENSG00000074657	ZNF532	-0.543908	0.28859	-2.42741	0.0158881	0.0456784	-3.72914
ENSG00000074660	SCARF1	0.247242	2.83532	1.11622	0.265362	0.395508	-6.20131
ENSG00000074695	LMAN1	-0.857341	0.312404	-5.42195	1.34903e-07	3.05988e-06	7.09838
ENSG00000074696	HACD3	-0.47144	0.133399	-2.82683	0.00506734	0.0184683	-2.69619
ENSG00000074706	IPCEF1	0.487399	0.97845	2.46886	0.0141993	0.0416625	-3.65768
ENSG00000074755	ZZEF1	0.125485	1.92173	1.34387	0.180164	0.298023	-5.8768
ENSG00000074800	ENO1	-0.319396	5.06957	-2.76698	0.00606501	0.0213763	-3.09333
ENSG00000074842	MYDGF	-0.486998	1.84901	-3.0207	0.00277383	0.0113821	-2.34415
ENSG00000074935	TUBE1	-0.340067	0.35477	-1.61629	0.107246	0.199685	-5.3165
ENSG00000074964	ARHGEF10L	0.0215655	1.70557	0.123278	0.901982	0.937907	-6.73938
ENSG00000075089	ACTR6	-0.209655	0.335471	-1.03043	0.303767	0.438073	-6.06359
ENSG00000075142	SRI	-0.119402	2.07659	-0.764157	0.445468	0.578597	-6.50181
ENSG00000075151	EIF4G3	0.79433	2.74665	6.39168	7.57501e-10	3.20036e-08	11.9958
ENSG00000075223	SEMA3C	-1.26656	0.917272	-7.37822	2.17051e-12	2.03491e-10	17.6928
ENSG00000075234	TTC38	-0.0559511	0.946668	-0.282496	0.777789	0.848842	-6.61712
ENSG00000075239	ACAT1	-0.479884	1.18508	-2.81566	0.00524138	0.0189552	-2.86307
ENSG00000075240	GRAMD4	0.0954809	1.28997	0.474835	0.635304	0.742748	-6.58382
ENSG00000075275	CELSR1	-1.27072	-0.422608	-6.22745	1.90037e-09	7.3075e-08	11.2101
ENSG00000075292	ZNF638	0.4414	3.58239	3.16785	0.00171957	0.0077542	-1.94883
ENSG00000075303	SLC25A40	0.47484	0.917153	2.42917	0.015813	0.0454951	-3.75576
ENSG00000075399	VPS9D1	0.12254	3.55946	0.670271	0.503282	0.631443	-6.61357
ENSG00000075407	ZNF37A	-0.244929	-0.0782806	-1.55121	0.122069	0.22073	-5.32723
ENSG00000075413	MARK3	0.298151	3.35399	3.27568	0.00119769	0.00576249	-1.61556
ENSG00000075415	SLC25A3	-0.522343	3.21685	-4.61494	6.18755e-06	7.58534e-05	3.3169
ENSG00000075420	FNDC3B	0.466238	5.17694	3.82218	0.000165668	0.00113568	0.211933
ENSG00000075426	FOSL2	0.167388	5.31747	1.26863	0.20571	0.328256	-6.04121
ENSG00000075539	FRYL	0.18315	2.1256	1.557	0.12069	0.218677	-5.58634
ENSG00000075568	TMEM131	0.199154	1.4071	1.50642	0.133177	0.23707	-5.59353
ENSG00000075624	ACTB	0.212977	10.0213	1.72435	0.0858364	0.167554	-5.30336
ENSG00000075651	PLD1	0.0368166	2.21061	0.199817	0.84178	0.895933	-6.77282
ENSG00000075711	DLG1	-0.197486	1.04021	-1.43442	0.152657	0.262842	-5.67789
ENSG00000075785	RAB7A	0.184804	4.93375	2.02776	0.0436073	0.0999466	-4.81561
ENSG00000075790	BCAP29	-0.000232366	0.445509	-0.00133018	0.99894	0.999447	-6.57605
ENSG00000075856	SART3	-0.0606341	1.29401	-0.470773	0.638198	0.744628	-6.61053
ENSG00000075884	ARHGAP15	0.643459	3.53931	3.49174	0.000563902	0.00314329	-0.919602
ENSG00000075914	EXOSC7	-0.556326	-0.394005	-3.02566	0.00273022	0.0112359	-2.05251
ENSG00000076043	REXO2	-0.226699	-0.291089	-1.10844	0.268698	0.399195	-5.8671
ENSG00000076053	RBM7	0.841308	1.61284	5.70576	3.15371e-08	8.64767e-07	8.45657
ENSG00000076067	RBMS2	-0.429144	0.295067	-1.96924	0.0499896	0.111234	-4.68404
ENSG00000076108	BAZ2A	0.300626	3.58102	2.90235	0.00402206	0.0152957	-2.7223
ENSG00000076201	PTPN23	-0.41095	1.15719	-2.74034	0.00656396	0.0228243	-3.06238
ENSG00000076242	MLH1	0.111781	1.19452	0.850636	0.395756	0.530477	-6.33464
ENSG00000076382	SPAG5	-0.43408	0.0735166	-2.4041	0.016914	0.0479832	-3.743
ENSG00000076513	ANKRD13A	0.285669	2.90356	2.46355	0.0144066	0.0421829	-3.84349
ENSG00000076554	TPD52	-0.792615	0.0373518	-3.48311	0.000581544	0.00322701	-0.743997
ENSG00000076555	ACACB	-0.484472	1.07247	-2.46079	0.014515	0.0424496	-3.75543
ENSG00000076604	TRAF4	-0.638446	0.989986	-3.23861	0.00135771	0.00639489	-1.62044
ENSG00000076641	PAG1	0.346608	3.48794	1.938	0.0537079	0.117515	-4.98275
ENSG00000076662	ICAM3	0.391619	3.67792	2.25262	0.0251192	0.0651576	-4.3418
ENSG00000076685	NT5C2	0.572622	4.15063	4.67517	4.72701e-06	6.10665e-05	3.57055
ENSG00000076924	XAB2	-0.00151095	0.727307	-0.0133041	0.989395	0.992867	-6.62365
ENSG00000076928	ARHGEF1	0.148778	4.2093	1.20234	0.230327	0.356908	-6.12584
ENSG00000076944	STXBP2	0.318024	6.50561	2.17222	0.0307448	0.0764851	-4.50472
ENSG00000076984	MAP2K7	-0.590536	0.536284	-4.0686	6.28085e-05	0.000520005	1.27662
ENSG00000077044	DGKD	-0.134237	2.58814	-0.798899	0.42508	0.559349	-6.49797
ENSG00000077097	TOP2B	0.217575	1.06834	1.77396	0.0772427	0.154329	-5.12269
ENSG00000077147	TM9SF3	0.173451	2.10887	1.41274	0.15893	0.271333	-5.7961
ENSG00000077150	NFKB2	0.475799	4.86661	3.20995	0.00149482	0.00692144	-1.82721
ENSG00000077157	PPP1R12B	-0.945214	0.497281	-5.53427	7.63883e-08	1.85671e-06	7.62619
ENSG00000077232	DNAJC10	-0.0693933	0.609798	-0.400594	0.689049	0.783351	-6.53848
ENSG00000077235	GTF3C1	-0.00418574	0.825997	-0.0291062	0.976802	0.985209	-6.64373
ENSG00000077238	IL4R	0.127	5.52526	0.796146	0.426675	0.560848	-6.52143
ENSG00000077254	USP33	0.0250918	2.2268	0.178595	0.858395	0.908802	-6.78012
ENSG00000077312	SNRPA	-0.251785	0.938186	-1.57341	0.116844	0.213515	-5.46445
ENSG00000077327	SPAG6	-1.14588	-0.69787	-4.74495	3.44858e-06	4.68246e-05	4.11378
ENSG00000077380	DYNC1I2	-0.0856606	1.94648	-0.62332	0.533622	0.658598	-6.5854
ENSG00000077420	APBB1IP	0.454552	3.66754	3.09893	0.00215596	0.00934125	-2.15616
ENSG00000077454	LRCH4	-0.11058	3.27568	-0.885135	0.376903	0.512238	-6.44619
ENSG00000077458	FAM76B	0.147956	1.29882	0.818109	0.414046	0.548714	-6.36869
ENSG00000077463	SIRT6	0.144549	1.12307	0.902287	0.367742	0.502704	-6.27925
ENSG00000077514	POLD3	0.250845	0.986005	1.75068	0.0811825	0.160219	-5.14314
ENSG00000077549	CAPZB	0.204491	4.38022	2.30955	0.0216991	0.0581083	-4.22139
ENSG00000077585	GPR137B	0.078254	2.64923	0.512054	0.609049	0.722381	-6.68197
ENSG00000077684	JADE1	-0.0399987	-0.0240988	-0.242364	0.808689	0.872264	-6.46451
ENSG00000077721	UBE2A	0.00144986	2.3891	0.0123819	0.99013	0.993141	-6.80267
ENSG00000077782	FGFR1	-0.925447	0.200386	-3.89941	0.000122869	0.000892638	0.662776
ENSG00000077984	CST7	0.937964	4.30027	4.02084	7.60815e-05	0.000599637	0.942501
ENSG00000078043	PIAS2	-0.508978	-0.0130179	-2.82498	0.00509585	0.018531	-2.68126
ENSG00000078061	ARAF	-0.142138	1.73895	-1.36004	0.174998	0.291782	-5.84907
ENSG00000078070	MCCC1	0.068226	-0.204557	0.310044	0.756777	0.834183	-6.39178
ENSG00000078081	LAMP3	1.89186	1.23454	5.49027	9.55496e-08	2.25561e-06	7.46994
ENSG00000078098	FAP	2.15883	0.0848877	5.03105	9.12099e-07	1.54401e-05	5.40858
ENSG00000078114	NEBL	-1.30259	-0.27151	-5.76038	2.36957e-08	6.72219e-07	8.79171
ENSG00000078124	ACER3	-0.16089	1.59414	-1.03953	0.299527	0.433535	-6.21934
ENSG00000078140	UBE2K	0.0663507	1.95684	0.490001	0.624547	0.734799	-6.65374
ENSG00000078142	PIK3C3	0.171811	1.5985	1.30227	0.193978	0.314947	-5.89764
ENSG00000078269	SYNJ2	0.0999539	0.34696	0.647082	0.518151	0.644758	-6.35635
ENSG00000078304	PPP2R5C	0.355023	3.90793	3.5066	0.000534676	0.00300419	-0.877892
ENSG00000078369	GNB1	0.18514	4.83725	2.20757	0.0281499	0.0711444	-4.44474
ENSG00000078401	EDN1	0.300329	0.427976	1.08096	0.280719	0.412139	-5.97635
ENSG00000078403	MLLT10	-0.11761	1.20633	-0.673459	0.501255	0.629623	-6.47994
ENSG00000078487	ZCWPW1	0.385241	1.35182	2.08369	0.0381672	0.090139	-4.56558
ENSG00000078618	NRDC	0.375332	3.87105	3.55366	0.000451245	0.00264343	-0.720372
ENSG00000078668	VDAC3	0.0360684	1.24065	0.241633	0.809255	0.872542	-6.68062
ENSG00000078674	PCM1	0.0770649	2.68109	0.578064	0.563722	0.685435	-6.65109
ENSG00000078687	TNRC6C	-0.00462185	0.141094	-0.0286272	0.977184	0.985392	-6.51214
ENSG00000078699	CBFA2T2	-0.0174617	0.0735615	-0.125742	0.900033	0.936443	-6.50216
ENSG00000078747	ITCH	0.0543957	2.41326	0.438896	0.661102	0.762316	-6.70859
ENSG00000078804	TP53INP2	-0.179608	1.84968	-1.12564	0.261357	0.391419	-6.14685
ENSG00000078808	SDF4	-0.0677202	3.0602	-0.607425	0.5441	0.668179	-6.64633
ENSG00000078814	MYH7B	-0.119372	-0.265875	-0.705653	0.481037	0.610617	-6.213
ENSG00000078902	TOLLIP	0.0197076	2.42748	0.144139	0.885503	0.926029	-6.79586
ENSG00000078967	UBE2D4	-1.02887	0.503453	-3.73349	0.000232129	0.00150136	0.0301182
ENSG00000079134	THOC1	-0.667069	0.189656	-3.94915	0.000101109	0.000756317	0.871345
ENSG00000079215	SLC1A3	0.535635	2.22558	2.80012	0.00549266	0.019676	-2.94573
ENSG00000079246	XRCC5	-0.012099	2.85559	-0.109764	0.912681	0.944976	-6.81769
ENSG00000079263	SP140	1.76417	2.85851	7.45248	1.3671e-12	1.34577e-10	18.1347
ENSG00000079277	MKNK1	-0.100459	4.34614	-0.668891	0.50416	0.632123	-6.61986
ENSG00000079308	TNS1	-0.0957573	1.98199	-0.510131	0.610394	0.723279	-6.65181
ENSG00000079313	REXO1	-0.423168	1.52852	-2.16016	0.0316763	0.0783078	-4.46898
ENSG00000079332	SAR1A	0.220102	2.13288	1.90255	0.0582064	0.124524	-5.00083
ENSG00000079335	CDC14A	0.108971	0.247731	0.773541	0.439906	0.573568	-6.2452
ENSG00000079385	CEACAM1	1.11801	3.53921	5.74529	2.5648e-08	7.2137e-07	8.5838
ENSG00000079387	SENP1	0.263141	0.645496	1.7317	0.0845153	0.165309	-5.11528
ENSG00000079432	CIC	-0.198775	2.31269	-1.466	0.14386	0.251709	-5.74295
ENSG00000079459	FDFT1	-0.30386	1.80165	-2.27137	0.0239446	0.06294	-4.2464
ENSG00000079739	PGM1	-0.232808	0.223376	-1.40933	0.159934	0.272811	-5.5987
ENSG00000079785	DDX1	0.0751923	0.0632389	0.403725	0.686747	0.782085	-6.43267
ENSG00000079805	DNM2	-0.397308	4.51751	-3.5884	0.000397677	0.00237978	-0.605407
ENSG00000079819	EPB41L2	-0.356554	0.190948	-1.92376	0.0554791	0.120268	-4.7682
ENSG00000079950	STX7	0.420917	2.47698	3.24725	0.00131874	0.00625322	-1.67278
ENSG00000079974	RABL2B	-0.902739	0.6613	-4.92565	1.49905e-06	2.33491e-05	4.77239
ENSG00000079999	KEAP1	0.146006	1.25007	0.972649	0.331634	0.466283	-6.23548
ENSG00000080189	SLC35C2	0.0411254	1.13878	0.314388	0.753479	0.831996	-6.64239
ENSG00000080298	RFX3	-0.332616	0.601432	-1.78591	0.0752816	0.151363	-5.0742
ENSG00000080345	RIF1	0.418618	0.754075	3.34768	0.000935744	0.00473354	-1.19262
ENSG00000080371	RAB21	0.262337	3.02242	1.8281	0.0686831	0.140916	-5.17618
ENSG00000080503	SMARCA2	-0.600793	3.16416	-2.87919	0.00431949	0.0162108	-2.78774
ENSG00000080603	SRCAP	-0.232978	1.66339	-1.99463	0.0471299	0.106297	-4.80441
ENSG00000080608	PUM3	-0.362001	-0.118691	-1.83388	0.0678175	0.139899	-4.85771
ENSG00000080802	CNOT4	0.24708	0.89108	2.08588	0.0379671	0.089757	-4.50796
ENSG00000080815	PSEN1	0.280428	4.01392	2.53904	0.0117005	0.0358036	-3.67993
ENSG00000080822	CLDND1	0.345826	2.04695	2.31728	0.0212674	0.0571933	-4.13158
ENSG00000080823	MOK	-0.744001	0.939749	-3.3397	0.000961902	0.00482864	-1.31556
ENSG00000080824	HSP90AA1	-0.0812633	5.12254	-0.487208	0.626523	0.736153	-6.71878
ENSG00000080845	DLGAP4	0.114758	2.22997	1.05992	0.290166	0.423233	-6.23623
ENSG00000081019	RSBN1	0.162269	0.623072	0.922921	0.356906	0.491657	-6.17002
ENSG00000081041	CXCL2	-0.756276	4.52113	-2.82617	0.00507754	0.0184969	-2.93593
ENSG00000081059	TCF7	0.304292	0.379391	1.59598	0.11171	0.206086	-5.27845
ENSG00000081087	OSTM1	0.142719	2.49141	1.11888	0.264226	0.394395	-6.18724
ENSG00000081154	PCNP	0.31071	2.03935	2.30679	0.0218551	0.0583988	-4.16166
ENSG00000081189	MEF2C	-0.553852	1.64726	-2.09181	0.0374283	0.0888889	-4.61877
ENSG00000081237	PTPRC	0.604057	6.4371	4.05399	6.66134e-05	0.000543733	1.07696
ENSG00000081307	UBA5	-0.63018	-0.143992	-3.28408	0.00116395	0.00564151	-1.33392
ENSG00000081320	STK17B	0.455956	3.81468	2.95025	0.00346529	0.013542	-2.58888
ENSG00000081665	ZNF506	-0.454366	0.873153	-3.06578	0.00240037	0.0101806	-2.12612
ENSG00000081760	AACS	-0.529256	1.10502	-2.68087	0.00781365	0.0260649	-3.21783
ENSG00000081791	DELE1	-0.0186749	1.23047	-0.149621	0.88118	0.923195	-6.69324
ENSG00000081870	HSPB11	-0.205312	-0.279364	-0.998082	0.31917	0.453836	-5.96672
ENSG00000081913	PHLPP1	-0.0645023	0.832077	-0.378145	0.705632	0.796405	-6.58299
ENSG00000081923	ATP8B1	-0.123381	-0.428956	-0.569037	0.569824	0.689532	-6.25496
ENSG00000082014	SMARCD3	0.704389	1.20492	3.15186	0.00181286	0.0080729	-1.83104
ENSG00000082068	WDR70	0.0506914	0.226304	0.299613	0.764712	0.839897	-6.48875
ENSG00000082074	FYB1	1.04279	4.90695	6.85092	5.31318e-11	3.17739e-09	14.5492
ENSG00000082153	BZW1	0.125869	3.69194	1.18729	0.236199	0.363361	-6.14041
ENSG00000082212	ME2	0.01357	1.75856	0.127088	0.898969	0.935559	-6.75431
ENSG00000082213	C5orf22	0.0587689	-0.0142025	0.357025	0.721363	0.807127	-6.42753
ENSG00000082258	CCNT2	0.464882	1.3866	3.21202	0.0014845	0.00689313	-1.6926
ENSG00000082397	EPB41L3	-0.0885994	2.67188	-0.53852	0.59068	0.706863	-6.67534
ENSG00000082515	MRPL22	-0.277621	-0.216043	-1.39867	0.163108	0.276833	-5.49914
ENSG00000082641	NFE2L1	-0.295397	2.4684	-2.04857	0.0415104	0.0961412	-4.74942
ENSG00000082701	GSK3B	0.0359982	1.64295	0.321154	0.748352	0.8281	-6.69896
ENSG00000082781	ITGB5	-1.6091	0.150138	-7.76365	1.91122e-13	2.35175e-11	20.0572
ENSG00000082805	ERC1	-0.156019	1.66016	-1.0393	0.299633	0.433572	-6.22829
ENSG00000082898	XPO1	0.135066	2.75569	1.0477	0.295753	0.429409	-6.274
ENSG00000082996	RNF13	0.58275	4.6298	4.2625	2.83223e-05	0.000266798	1.87152
ENSG00000083099	LYRM2	0.124972	0.243321	0.769516	0.442287	0.575909	-6.23869
ENSG00000083168	KAT6A	0.357404	2.78547	3.21323	0.00147852	0.00687507	-1.79154
ENSG00000083223	TUT7	0.373376	3.26098	2.59868	0.00989382	0.0313772	-3.51996
ENSG00000083290	ULK2	-0.675825	0.322551	-3.24212	0.00134178	0.00634107	-1.52888
ENSG00000083312	TNPO1	-0.00833276	2.41286	-0.0797945	0.936462	0.960612	-6.80313
ENSG00000083444	PLOD1	-0.437222	1.36752	-3.14665	0.00184423	0.00817037	-1.93614
ENSG00000083457	ITGAE	-0.5023	0.728013	-3.23084	0.00139371	0.0065363	-1.62326
ENSG00000083520	DIS3	0.0342417	0.218909	0.283171	0.777272	0.84856	-6.498
ENSG00000083535	PIBF1	0.19692	-0.256568	1.02573	0.305975	0.44029	-5.90777
ENSG00000083642	PDS5B	0.15349	0.896759	1.3436	0.180252	0.298085	-5.7576
ENSG00000083799	CYLD	0.689799	2.92189	5.67188	3.76192e-08	1.01464e-06	8.21979
ENSG00000083828	ZNF586	-0.147114	0.84201	-1.13071	0.259222	0.388991	-6.02976
ENSG00000083844	ZNF264	-0.234127	0.630759	-1.5473	0.123011	0.222287	-5.45165
ENSG00000083845	RPS5	-0.507114	3.60402	-2.85657	0.00462928	0.0171447	-2.85344
ENSG00000083857	FAT1	-0.346047	-0.256631	-1.56517	0.118763	0.216021	-5.27316
ENSG00000083896	YTHDC1	0.183347	2.70838	1.52522	0.128422	0.230354	-5.66474
ENSG00000083937	CHMP2B	0.989482	2.1199	7.2644	4.38383e-12	3.62643e-10	17.0089
ENSG00000084070	SMAP2	0.551964	4.0826	2.94398	0.003534	0.0137505	-2.60833
ENSG00000084072	PPIE	-0.491099	-0.206931	-2.8552	0.00464873	0.0172038	-2.56382
ENSG00000084073	ZMPSTE24	0.034912	0.985859	0.284251	0.776445	0.848033	-6.63592
ENSG00000084090	STARD7	-0.211578	1.25398	-1.44138	0.150684	0.260392	-5.69764
ENSG00000084093	REST	-0.0811407	0.82427	-0.71965	0.472389	0.603686	-6.39636
ENSG00000084110	HAL	0.0222214	1.40507	0.0897498	0.928555	0.956024	-6.70675
ENSG00000084112	SSH1	-0.460069	1.99385	-2.83194	0.00498952	0.018259	-2.87905
ENSG00000084207	GSTP1	-0.978111	3.63132	-4.04364	6.94438e-05	0.000558501	1.02657
ENSG00000084234	APLP2	-0.53241	5.07626	-5.11575	6.08353e-07	1.079e-05	5.53018
ENSG00000084463	WBP11	-0.0713142	0.75035	-0.556794	0.578148	0.696012	-6.49381
ENSG00000084623	EIF3I	-0.452309	2.03535	-3.27692	0.00119266	0.00574111	-1.57888
ENSG00000084652	TXLNA	-0.0980784	0.577664	-0.762004	0.44675	0.579497	-6.32081
ENSG00000084676	NCOA1	0.173441	2.40275	1.19676	0.232494	0.359289	-6.09177
ENSG00000084733	RAB10	0.00237178	3.93125	0.021089	0.983191	0.989268	-6.84012
ENSG00000084754	HADHA	-0.24414	2.18642	-2.79719	0.00554111	0.0198135	-2.9789
ENSG00000084764	MAPRE3	-0.871633	-0.20377	-4.91455	1.57889e-06	2.43614e-05	4.81063
ENSG00000084774	CAD	-0.363214	-0.286978	-1.88946	0.0599459	0.127343	-4.742
ENSG00000085063	CD59	-0.013104	3.44526	-0.0967778	0.922978	0.95199	-6.83145
ENSG00000085117	CD82	0.0250228	4.96864	0.163895	0.869941	0.91668	-6.82617
ENSG00000085224	ATRX	0.278949	2.27921	1.91448	0.0566588	0.122046	-4.98424
ENSG00000085231	AK6	0.0849426	0.426479	0.425803	0.670604	0.770115	-6.4795
ENSG00000085265	FCN1	0.343672	1.92666	2.04679	0.0416863	0.0963513	-4.69608
ENSG00000085276	MECOM	-0.496152	-0.343133	-2.05669	0.0407158	0.0947084	-4.4144
ENSG00000085365	SCAMP1	0.208575	0.229952	1.37833	0.169288	0.284284	-5.59804
ENSG00000085415	SEH1L	-0.486001	0.125466	-3.35491	0.000912646	0.00462653	-1.14441
ENSG00000085433	WDR47	-0.107381	0.278401	-0.639482	0.523074	0.649158	-6.36346
ENSG00000085449	WDFY1	0.586931	2.59431	3.89227	0.000126338	0.000913537	0.501137
ENSG00000085491	SLC25A24	0.0794094	1.03178	0.569886	0.569248	0.68926	-6.50614
ENSG00000085511	MAP3K4	-0.523378	-0.0403836	-2.82844	0.00504271	0.018399	-2.65754
ENSG00000085514	PILRA	0.160274	4.2876	1.03528	0.301503	0.435497	-6.31064
ENSG00000085662	AKR1B1	-1.2508	0.997495	-6.15191	2.88496e-09	1.04795e-07	10.7302
ENSG00000085719	CPNE3	-0.0920145	1.30949	-0.534613	0.593376	0.708882	-6.58316
ENSG00000085721	RRN3	-0.0829508	0.194475	-0.534084	0.593741	0.709147	-6.40796
ENSG00000085733	CTTN	-0.801198	0.490616	-3.38785	0.000813888	0.00423016	-1.11165
ENSG00000085788	DDHD2	-0.305573	0.0982313	-1.67133	0.0958633	0.182777	-5.17657
ENSG00000085831	TTC39A	-0.360666	-0.378312	-1.76445	0.0788327	0.156774	-4.93269
ENSG00000085832	EPS15	0.239771	1.95262	2.27534	0.0237015	0.0623662	-4.22367
ENSG00000085871	MGST2	-0.388448	-0.0813051	-2.09894	0.0367892	0.0877521	-4.36476
ENSG00000085872	CHERP	-0.122156	0.852904	-1.08615	0.278421	0.409622	-6.08448
ENSG00000085978	ATG16L1	-0.427944	0.693316	-2.75391	0.00630531	0.0220888	-2.96186
ENSG00000085982	USP40	-0.44981	-0.043674	-2.13046	0.0340749	0.0829255	-4.31486
ENSG00000085998	POMGNT1	-1.17478	-0.321425	-6.11293	3.57338e-09	1.2608e-07	10.6039
ENSG00000086015	MAST2	-0.856502	0.226958	-5.85337	1.44992e-08	4.35051e-07	9.23524
ENSG00000086061	DNAJA1	0.693823	4.08839	5.13572	5.52528e-07	9.96169e-06	5.6211
ENSG00000086062	B4GALT1	0.124888	3.10498	0.988929	0.323619	0.45798	-6.34337
ENSG00000086065	CHMP5	0.997236	2.38236	6.54073	3.24143e-10	1.48412e-08	12.8319
ENSG00000086102	NFX1	-0.12676	0.896094	-1.0352	0.301538	0.435497	-6.14105
ENSG00000086200	IPO11	0.880229	1.58894	3.91577	0.000115266	0.000847405	0.676167
ENSG00000086232	EIF2AK1	-0.271474	1.04506	-2.10831	0.0359631	0.0863886	-4.51599
ENSG00000086300	SNX10	0.578232	4.28916	3.45068	0.000652591	0.00353833	-1.06368
ENSG00000086504	MRPL28	-0.107885	1.05194	-0.803106	0.422649	0.557192	-6.37054
ENSG00000086544	ITPKC	-0.0447375	0.762724	-0.241751	0.809164	0.872542	-6.61014
ENSG00000086548	CEACAM6	-0.24956	1.2995	-0.858108	0.391625	0.526259	-6.35856
ENSG00000086589	RBM22	0.295307	1.76682	2.61883	0.00934234	0.0300592	-3.39581
ENSG00000086598	TMED2	-0.224666	2.61676	-1.61302	0.107955	0.200739	-5.53453
ENSG00000086619	ERO1B	0.435491	0.0215075	2.40955	0.0166692	0.0475088	-3.62981
ENSG00000086666	ZFAND6	0.352866	3.03505	2.82684	0.00506717	0.0184683	-2.9185
ENSG00000086730	LAT2	0.250235	3.70671	2.10941	0.0358678	0.0862018	-4.64802
ENSG00000086758	HUWE1	-0.128065	2.2869	-1.22275	0.222532	0.34849	-6.06225
ENSG00000086848	ALG9	-0.784127	0.38673	-4.10893	5.33477e-05	0.000455073	1.4289
ENSG00000087008	ACOX3	0.15879	0.283329	1.01658	0.3103	0.444692	-6.03067
ENSG00000087074	PPP1R15A	0.451521	6.31582	2.72683	0.00683072	0.023511	-3.19021
ENSG00000087077	TRIP6	-0.425657	0.362235	-2.57563	0.0105602	0.0330227	-3.38018
ENSG00000087086	FTL	-0.470657	9.57879	-3.17902	0.00165708	0.0075241	-1.85697
ENSG00000087087	SRRT	-0.251978	2.44082	-2.13438	0.0337495	0.0822962	-4.57197
ENSG00000087088	BAX	-0.134563	2.50386	-0.881233	0.379008	0.513976	-6.42972
ENSG00000087111	PIGS	-0.0845689	0.912065	-0.630903	0.528659	0.653912	-6.46841
ENSG00000087152	ATXN7L3	0.130222	2.58225	1.1361	0.256962	0.386223	-6.17063
ENSG00000087157	PGS1	0.121652	4.36879	0.832455	0.405918	0.540272	-6.49815
ENSG00000087191	PSMC5	-0.0386195	1.74367	-0.288685	0.773053	0.845078	-6.71955
ENSG00000087206	UIMC1	0.133961	1.94716	0.897963	0.370038	0.504935	-6.3717
ENSG00000087237	CETP	0.915204	-0.248733	4.71481	3.95339e-06	5.23784e-05	4.03061
ENSG00000087253	LPCAT2	0.815724	2.78979	4.62069	6.03134e-06	7.45886e-05	3.36954
ENSG00000087263	OGFOD1	-0.0264978	-0.0709582	-0.147268	0.883035	0.924351	-6.48042
ENSG00000087266	SH3BP2	0.0175744	4.95125	0.146678	0.8835	0.924642	-6.82907
ENSG00000087274	ADD1	0.0598913	3.29408	0.553255	0.580565	0.697983	-6.68112
ENSG00000087302	RTRAF	-0.0357969	1.72116	-0.240836	0.809872	0.872921	-6.73329
ENSG00000087338	GMCL1	0.109666	0.923253	0.699448	0.484899	0.613944	-6.40637
ENSG00000087365	SF3B2	-0.0565146	2.9884	-0.583082	0.560344	0.682677	-6.65875
ENSG00000087460	GNAS	-0.321823	5.02728	-3.23643	0.00136775	0.00643907	-1.7429
ENSG00000087470	DNM1L	-0.083352	1.4246	-0.603872	0.546456	0.670236	-6.54769
ENSG00000087502	ERGIC2	-0.00793752	1.52234	-0.044882	0.964236	0.978486	-6.74124
ENSG00000087589	CASS4	-0.326005	0.576833	-1.44133	0.150696	0.260392	-5.60049
ENSG00000087884	AAMDC	-0.351528	0.389749	-1.57942	0.115458	0.211455	-5.38785
ENSG00000087903	RFX2	-0.310791	2.84088	-1.9832	0.0483994	0.108321	-4.89054
ENSG00000088038	CNOT3	0.119915	1.96649	0.928769	0.353872	0.488728	-6.34403
ENSG00000088205	DDX18	-0.12253	1.20225	-1.01586	0.310644	0.445121	-6.19983
ENSG00000088247	KHSRP	-0.536917	2.57175	-3.96048	9.66912e-05	0.000728254	0.73024
ENSG00000088256	GNA11	-0.998184	0.43648	-4.30315	2.38793e-05	0.000229559	2.17563
ENSG00000088280	ASAP3	-0.178514	0.330433	-0.755426	0.450679	0.583287	-6.3103
ENSG00000088298	EDEM2	0.359555	1.38218	2.4055	0.0168511	0.0478736	-3.87425
ENSG00000088367	EPB41L1	-1.90328	-0.563108	-8.89706	1.00794e-16	3.87598e-14	27.3235
ENSG00000088387	DOCK9	-0.532141	-0.153917	-2.60654	0.00967541	0.0308735	-3.22108
ENSG00000088448	ANKRD10	0.364092	4.71404	1.86524	0.0632763	0.132418	-5.12631
ENSG00000088682	COQ9	-0.18652	-0.0596119	-0.993908	0.321194	0.455661	-6.01112
ENSG00000088727	KIF9	-0.768831	-0.67259	-4.00248	8.1861e-05	0.000638542	1.18346
ENSG00000088766	CRLS1	-0.315516	-0.0280545	-1.68516	0.0931596	0.178626	-5.11682
ENSG00000088808	PPP1R13B	-0.984771	-0.0724431	-5.16691	4.75147e-07	8.82518e-06	5.92587
ENSG00000088826	SMOX	-0.163507	0.201296	-0.797057	0.426147	0.560303	-6.23613
ENSG00000088827	SIGLEC1	1.4426	1.42883	3.91184	0.000117052	0.000856061	0.716612
ENSG00000088832	FKBP1A	0.0432091	4.63348	0.398828	0.690348	0.784461	-6.7625
ENSG00000088833	NSFL1C	0.0664623	2.43944	0.536673	0.591953	0.708043	-6.66149
ENSG00000088836	SLC4A11	-1.13559	-0.335579	-4.14117	4.67787e-05	0.000407153	1.63775
ENSG00000088930	XRN2	0.451903	1.85624	3.20539	0.00151777	0.00700646	-1.75364
ENSG00000088986	DYNLL1	-0.371168	3.22743	-1.93383	0.0542213	0.118323	-4.99321
ENSG00000088992	TESC	0.615083	0.383104	2.35891	0.0190707	0.0526598	-3.78299
ENSG00000089006	SNX5	-0.164357	1.82066	-1.40967	0.159835	0.272689	-5.7914
ENSG00000089009	RPL6	-0.496656	4.06624	-3.36009	0.000896401	0.00457211	-1.35795
ENSG00000089022	MAPKAPK5	-0.308852	0.317458	-2.0685	0.0395837	0.092865	-4.49256
ENSG00000089041	P2RX7	0.570115	1.76985	2.81489	0.00525363	0.0189856	-2.86676
ENSG00000089053	ANAPC5	-0.0661489	1.79542	-0.553003	0.580737	0.698105	-6.61481
ENSG00000089057	SLC23A2	0.449894	0.412234	2.68411	0.00774057	0.0258875	-3.04492
ENSG00000089060	SLC8B1	-0.199949	2.00217	-1.69813	0.0906818	0.175068	-5.3638
ENSG00000089063	TMEM230	-0.390589	1.21858	-3.30105	0.00109846	0.0053824	-1.44943
ENSG00000089094	KDM2B	-0.476809	0.703178	-3.34006	0.000960714	0.00482864	-1.2643
ENSG00000089101	CFAP61	-1.35517	-1.04034	-5.88012	1.25754e-08	3.82076e-07	9.42287
ENSG00000089127	OAS1	2.05953	3.55499	6.21593	2.02565e-09	7.69902e-08	11.0529
ENSG00000089154	GCN1	-0.795102	1.24087	-4.62778	5.8436e-06	7.30005e-05	3.44419
ENSG00000089157	RPLP0	-0.694185	4.07979	-3.88281	0.000131076	0.000941148	0.429518
ENSG00000089159	PXN	-0.109184	4.20332	-0.761481	0.447062	0.579749	-6.55409
ENSG00000089220	PEBP1	-0.916461	1.43247	-7.28852	3.77924e-12	3.17973e-10	17.1437
ENSG00000089248	ERP29	-0.132931	1.3921	-0.90977	0.363788	0.498487	-6.32084
ENSG00000089280	FUS	0.0230679	4.0106	0.256865	0.797487	0.864017	-6.80808
ENSG00000089289	IGBP1	0.550183	0.645495	4.04844	6.81175e-05	0.000553837	1.25102
ENSG00000089327	FXYD5	-0.0549528	3.38856	-0.401326	0.68851	0.783096	-6.75545
ENSG00000089335	ZNF302	-0.763429	-0.348256	-3.77901	0.000195382	0.00129605	0.321288
ENSG00000089351	GRAMD1A	0.330627	5.50037	1.76219	0.0792155	0.157208	-5.30445
ENSG00000089356	FXYD3	-0.860851	0.757869	-2.85494	0.0046524	0.0172109	-2.73526
ENSG00000089486	CDIP1	-0.123784	0.281066	-0.699227	0.485037	0.613951	-6.32341
ENSG00000089505	CMTM1	0.412039	1.14294	1.83504	0.0676446	0.1396	-4.99264
ENSG00000089597	GANAB	-0.430342	2.21744	-3.64504	0.000322942	0.0019869	-0.382003
ENSG00000089639	GMIP	0.319923	3.80071	2.41014	0.0166428	0.0474737	-3.98716
ENSG00000089692	LAG3	1.34469	-0.0776899	3.7971	0.000182364	0.00122039	0.503135
ENSG00000089693	MLF2	-0.146501	2.88926	-1.273	0.204157	0.326731	-6.02512
ENSG00000089737	DDX24	-0.399536	1.68457	-2.97867	0.00316933	0.0126311	-2.44974
ENSG00000089775	ZBTB25	0.273459	-0.0704184	1.80109	0.0728504	0.14759	-4.87142
ENSG00000089818	NECAP1	0.26032	2.48542	2.01601	0.0448298	0.102201	-4.80248
ENSG00000089820	ARHGAP4	0.196797	3.24889	1.48183	0.139599	0.245833	-5.74553
ENSG00000089876	DHX32	-0.674132	-0.415058	-3.3184	0.00103507	0.00513055	-1.1871
ENSG00000089902	RCOR1	-0.0279687	1.67558	-0.200736	0.841062	0.895266	-6.7334
ENSG00000089916	GPATCH2L	0.178213	2.04915	1.55269	0.121717	0.220229	-5.58663
ENSG00000090006	LTBP4	-0.633101	0.894583	-2.81064	0.00532137	0.0191741	-2.85292
ENSG00000090013	BLVRB	-0.412392	2.11557	-2.54387	0.0115439	0.0354345	-3.63207
ENSG00000090020	SLC9A1	-0.201181	1.26072	-1.70821	0.0887935	0.172131	-5.28246
ENSG00000090054	SPTLC1	-0.170967	2.13484	-1.34534	0.179691	0.29754	-5.9008
ENSG00000090060	PAPOLA	0.22258	3.73629	2.44288	0.0152383	0.0441583	-3.91034
ENSG00000090061	CCNK	0.419587	2.00339	3.899	0.000123069	0.000893431	0.552835
ENSG00000090104	RGS1	0.916489	2.47593	3.64447	0.000323629	0.00198988	-0.356336
ENSG00000090238	YPEL3	0.059022	3.65426	0.324716	0.745658	0.825769	-6.78568
ENSG00000090263	MRPS33	-0.718183	-0.436984	-3.3336	0.00098234	0.0049112	-1.13214
ENSG00000090266	NDUFB2	-0.571986	2.39609	-3.79875	0.000181214	0.00121434	0.147456
ENSG00000090273	NUDC	-0.540588	1.40976	-3.52577	0.000499088	0.00284813	-0.742916
ENSG00000090316	MAEA	-0.294474	3.49904	-1.96236	0.0507899	0.112405	-4.94155
ENSG00000090339	ICAM1	0.918271	4.96708	5.84975	1.47806e-08	4.37728e-07	9.10065
ENSG00000090372	STRN4	-0.237452	2.84483	-2.08885	0.037696	0.0893307	-4.68005
ENSG00000090376	IRAK3	0.631846	4.22018	3.2087	0.00150106	0.00694383	-1.82968
ENSG00000090382	LYZ	-0.738329	6.13185	-4.52801	9.0833e-06	0.000104948	2.96375
ENSG00000090432	MUL1	0.140567	-0.18044	0.969057	0.333419	0.46768	-5.98779
ENSG00000090487	SPG21	-0.125246	2.90689	-1.2592	0.209088	0.332052	-6.04288
ENSG00000090520	DNAJB11	0.0468351	1.65	0.311675	0.755538	0.833522	-6.69714
ENSG00000090581	GNPTG	-0.18238	2.17543	-1.26367	0.207483	0.330134	-6.00919
ENSG00000090615	GOLGA3	-0.583242	1.27281	-3.98243	8.86474e-05	0.00067963	0.877786
ENSG00000090621	PABPC4	-0.607047	2.62007	-4.04606	6.87699e-05	0.000556616	1.0488
ENSG00000090661	CERS4	-0.51837	0.745603	-2.84453	0.00480236	0.0176793	-2.7387
ENSG00000090674	MCOLN1	-0.266547	3.39829	-1.7861	0.0752503	0.151331	-5.26414
ENSG00000090686	USP48	-0.14458	1.43132	-1.16407	0.245465	0.373414	-6.06513
ENSG00000090857	PDPR	0.143339	0.560503	1.11057	0.267781	0.398072	-5.98336
ENSG00000090861	AARS1	-0.436434	0.746432	-2.712	0.0071349	0.0242823	-3.07902
ENSG00000090863	GLG1	-0.00213681	1.99423	-0.0206129	0.98357	0.989268	-6.77749
ENSG00000090905	TNRC6A	-0.23199	0.988938	-1.36037	0.174894	0.291723	-5.77382
ENSG00000090924	PLEKHG2	0.334534	3.53553	1.82483	0.0691768	0.141841	-5.191
ENSG00000090989	EXOC1	0.507707	1.02576	3.37648	0.000846784	0.00435742	-1.12677
ENSG00000091039	OSBPL8	0.190508	3.39761	1.50043	0.134719	0.239037	-5.72118
ENSG00000091073	DTX2	-0.0161244	3.24514	-0.12794	0.898295	0.935154	-6.8248
ENSG00000091106	NLRC4	0.500878	1.52918	2.73954	0.0065794	0.0228699	-3.04026
ENSG00000091136	LAMB1	-0.648617	0.259957	-3.32641	0.00100698	0.00501911	-1.26317
ENSG00000091140	DLD	-0.376169	1.64705	-2.60783	0.0096398	0.0307968	-3.44059
ENSG00000091157	WDR7	-0.0434272	0.808151	-0.255087	0.798858	0.865027	-6.61858
ENSG00000091164	TXNL1	0.151831	1.2231	1.24094	0.21575	0.340687	-5.93809
ENSG00000091317	CMTM6	0.402238	4.01455	3.16346	0.00174471	0.00784961	-1.96714
ENSG00000091409	ITGA6	-0.504625	-0.291957	-2.64337	0.00870833	0.0284611	-3.09012
ENSG00000091436	MAP3K20	0.329897	1.61518	2.18049	0.0301197	0.0753108	-4.38922
ENSG00000091483	FH	-0.663486	-0.459859	-3.34209	0.000954008	0.00480617	-1.09189
ENSG00000091490	SEL1L3	-0.0274711	1.5539	-0.193312	0.846866	0.900178	-6.72431
ENSG00000091527	CDV3	-0.115666	2.9329	-1.05511	0.292356	0.425715	-6.27585
ENSG00000091542	ALKBH5	-0.509153	1.07183	-3.85506	0.000145959	0.00102484	0.431211
ENSG00000091592	NLRP1	-0.265931	1.53428	-1.79882	0.073209	0.148175	-5.14957
ENSG00000091640	SPAG7	-0.0835942	2.17611	-0.668595	0.504349	0.632218	-6.57478
ENSG00000091651	ORC6	-0.591476	1.97822	-3.36601	0.000878178	0.00450015	-1.30184
ENSG00000092010	PSME1	0.748899	3.90975	5.3778	1.68295e-07	3.74818e-06	6.76295
ENSG00000092020	PPP2R3C	0.621178	2.06947	4.03846	7.08995e-05	0.000568814	1.07377
ENSG00000092036	HAUS4	0.671047	2.03524	3.82996	0.000160787	0.0011069	0.315845
ENSG00000092068	SLC7A8	-1.94194	-0.0069227	-9.80942	1.59348e-19	1.93849e-16	33.6224
ENSG00000092094	OSGEP	-0.277613	0.473777	-2.08874	0.0377063	0.0893336	-4.4765
ENSG00000092098	RNF31	0.635318	2.23632	4.86107	2.02451e-06	2.9879e-05	4.4272
ENSG00000092108	SCFD1	0.161362	1.94396	1.11742	0.264849	0.395027	-6.15295
ENSG00000092140	G2E3	0.0599467	0.93131	0.273614	0.784599	0.854002	-6.62377
ENSG00000092148	HECTD1	-0.126712	2.05869	-0.971354	0.332277	0.466699	-6.32243
ENSG00000092199	HNRNPC	0.34064	5.29361	3.68381	0.000279644	0.00176107	-0.275387
ENSG00000092201	SUPT16H	-0.224749	0.742234	-1.74899	0.0814763	0.1607	-5.15167
ENSG00000092203	TOX4	0.209508	2.23421	1.88564	0.0604615	0.128245	-5.03788
ENSG00000092208	GEMIN2	-0.297542	-0.496758	-1.2819	0.201023	0.323081	-5.61924
ENSG00000092330	TINF2	0.205342	2.4122	1.95713	0.0514048	0.113485	-4.91284
ENSG00000092439	TRPM7	0.351311	1.22239	2.49076	0.0133729	0.0398316	-3.64978
ENSG00000092529	CAPN3	-0.211125	0.4201	-1.4543	0.147071	0.255971	-5.54508
ENSG00000092531	SNAP23	0.277707	3.17955	2.26285	0.0244723	0.0638668	-4.31191
ENSG00000092621	PHGDH	-0.466152	-0.505774	-2.10331	0.036402	0.0871242	-4.3031
ENSG00000092820	EZR	-0.328305	3.85569	-2.21708	0.0274849	0.0698764	-4.42409
ENSG00000092841	MYL6	-0.263931	6.66965	-2.75143	0.00635193	0.0222076	-3.11487
ENSG00000092847	AGO1	-0.200917	-0.0322528	-1.58852	0.113386	0.208592	-5.26623
ENSG00000092871	RFFL	0.104061	2.5643	0.764664	0.445167	0.578389	-6.52032
ENSG00000092929	UNC13D	-0.00750644	4.01489	-0.0533325	0.957508	0.97419	-6.8395
ENSG00000092931	MFSD11	0.24525	1.33686	2.08956	0.0376321	0.0892651	-4.56703
ENSG00000092964	DPYSL2	-0.526558	1.57429	-3.38398	0.000824955	0.00428089	-1.2104
ENSG00000093000	NUP50	-0.00885422	2.47256	-0.0794961	0.936699	0.960612	-6.80602
ENSG00000093010	COMT	-0.710969	2.08034	-4.36175	1.86308e-05	0.000187585	2.29692
ENSG00000093072	ADA2	-0.037224	2.49785	-0.243228	0.808021	0.871995	-6.77825
ENSG00000093134	VNN3	0.443165	2.98005	2.20282	0.0284874	0.0718868	-4.43312
ENSG00000093144	ECHDC1	-0.214047	1.57055	-1.45283	0.147479	0.256289	-5.71394
ENSG00000093167	LRRFIP2	0.0742723	2.51657	0.616391	0.538177	0.662973	-6.61873
ENSG00000093183	SEC22C	-0.326218	0.765111	-2.20868	0.0280715	0.0709884	-4.27478
ENSG00000094631	HDAC6	-0.10639	1.97593	-0.709293	0.478779	0.608928	-6.53203
ENSG00000094755	GABRP	-0.815701	0.886812	-2.8053	0.0054076	0.019414	-2.88314
ENSG00000094916	CBX5	-0.206417	0.0246843	-1.7376	0.083469	0.163549	-5.04395
ENSG00000094975	SUCO	0.532729	1.21174	3.3456	0.000942512	0.00475922	-1.25889
ENSG00000095015	MAP3K1	0.611605	1.53894	3.97185	9.24404e-05	0.000700526	0.87905
ENSG00000095059	DHPS	-0.325147	0.787442	-2.14124	0.033187	0.0812668	-4.41781
ENSG00000095066	HOOK2	-0.415611	1.51592	-2.11745	0.0351734	0.0850313	-4.55864
ENSG00000095139	ARCN1	0.0878211	1.94527	0.799175	0.42492	0.559287	-6.45552
ENSG00000095209	TMEM38B	-0.274138	0.501775	-1.56571	0.118635	0.215908	-5.41129
ENSG00000095261	PSMD5	0.205637	0.233942	1.13201	0.258676	0.388291	-5.91052
ENSG00000095319	NUP188	-0.656771	0.926204	-3.85842	0.000144076	0.00101576	0.448791
ENSG00000095370	SH2D3C	0.244027	2.15441	1.60831	0.108983	0.201887	-5.50397
ENSG00000095380	NANS	-0.0818293	2.32734	-0.783027	0.434326	0.5684	-6.49905
ENSG00000095383	TBC1D2	0.343915	2.8749	1.91981	0.0559787	0.121028	-5.00221
ENSG00000095397	WHRN	0.0543911	0.90229	0.265175	0.791085	0.858878	-6.61572
ENSG00000095485	CWF19L1	0.142206	0.305331	0.912027	0.362601	0.497207	-6.12387
ENSG00000095564	BTAF1	0.198803	0.559312	1.4633	0.144595	0.252689	-5.5259
ENSG00000095787	WAC	0.621294	3.72227	5.34523	1.97957e-07	4.28283e-06	6.60784
ENSG00000095794	CREM	0.757961	4.606	5.4357	1.25888e-07	2.88195e-06	7.03816
ENSG00000095906	NUBP2	-0.467746	0.235426	-3.08742	0.00223812	0.00961259	-1.97585
ENSG00000095951	HIVEP1	0.636901	3.23966	4.54551	8.41144e-06	9.81069e-05	3.03589
ENSG00000096060	FKBP5	0.312769	2.75751	1.31628	0.189242	0.309092	-5.95358
ENSG00000096063	SRPK1	0.300469	3.04557	1.86273	0.0636312	0.132934	-5.11369
ENSG00000096070	BRPF3	-0.0798983	0.882947	-0.5543	0.579851	0.697295	-6.51328
ENSG00000096080	MRPS18A	0.129043	-0.0164238	0.708343	0.479368	0.609519	-6.24321
ENSG00000096093	EFHC1	-0.518059	2.24497	-2.25379	0.0250446	0.0650499	-4.31783
ENSG00000096384	HSP90AB1	-0.34467	4.06541	-1.973	0.0495574	0.110447	-4.92409
ENSG00000096696	DSP	-0.980968	-0.435686	-4.85383	2.09347e-06	3.07338e-05	4.56765
ENSG00000096717	SIRT1	0.64126	0.74063	4.1302	4.8922e-05	0.000422269	1.55176
ENSG00000096746	HNRNPH3	0.336537	2.84427	2.60566	0.00969962	0.0309307	-3.49114
ENSG00000096872	IFT74	0.148188	-0.401639	0.701731	0.483476	0.612764	-6.15052
ENSG00000096968	JAK2	1.04304	2.43764	6.5076	3.91908e-10	1.76162e-08	12.6482
ENSG00000096996	IL12RB1	0.365904	0.473356	2.34053	0.0200148	0.0545778	-3.89472
ENSG00000097033	SH3GLB1	0.732916	3.28792	4.66182	5.01889e-06	6.39145e-05	3.52676
ENSG00000099139	PCSK5	-1.75139	3.23956	-2.95509	0.00341319	0.0134023	-2.57602
ENSG00000099194	SCD	-2.76156	0.460085	-11.2214	4.41519e-24	1.08658e-20	43.8969
ENSG00000099203	TMED1	0.183818	0.666878	1.18544	0.236929	0.364199	-5.91566
ENSG00000099204	ABLIM1	-0.60614	0.2178	-2.91795	0.00383239	0.0146623	-2.45566
ENSG00000099246	RAB18	0.271381	2.40782	2.02203	0.0441996	0.101044	-4.78618
ENSG00000099250	NRP1	-1.18446	0.941878	-5.83576	1.59196e-08	4.66405e-07	9.09891
ENSG00000099282	TSPAN15	-1.54443	-0.565271	-7.07756	1.36928e-11	9.55974e-10	15.9334
ENSG00000099290	WASHC2A	0.71598	1.91376	4.43105	1.38449e-05	0.000147979	2.62407
ENSG00000099308	MAST3	-0.143799	2.78221	-0.919783	0.358541	0.493012	-6.40423
ENSG00000099326	MZF1	-0.520426	-0.26457	-3.50285	0.000541917	0.00303794	-0.603832
ENSG00000099330	OCEL1	-0.517032	-0.267906	-2.54894	0.0113816	0.0350784	-3.34114
ENSG00000099331	MYO9B	-0.351447	4.48302	-2.98064	0.00314969	0.0125824	-2.50645
ENSG00000099337	KCNK6	0.134626	1.26002	0.675721	0.49982	0.62798	-6.47283
ENSG00000099338	CATSPERG	-0.289293	-0.197203	-1.40679	0.160686	0.273855	-5.52397
ENSG00000099341	PSMD8	-0.344477	2.5435	-2.89474	0.00411762	0.015572	-2.72761
ENSG00000099364	FBXL19	0.0239731	0.0580614	0.154886	0.877032	0.920815	-6.48919
ENSG00000099377	HSD3B7	0.00622307	0.893215	0.035917	0.971376	0.981979	-6.67053
ENSG00000099622	CIRBP	-0.334891	3.07068	-2.3688	0.0185791	0.0515626	-4.07861
ENSG00000099624	ATP5F1D	-0.422243	1.51504	-2.50459	0.0128735	0.0386832	-3.68496
ENSG00000099725	PRKY	0.0492124	-0.699334	0.227925	0.819884	0.88053	-6.34297
ENSG00000099783	HNRNPM	0.0564306	3.86296	0.571819	0.56794	0.688437	-6.67751
ENSG00000099785	MARCHF2	-0.0991784	2.24039	-0.759141	0.448458	0.581177	-6.51093
ENSG00000099795	NDUFB7	-0.685076	1.47171	-3.25865	0.00126889	0.00606314	-1.60674
ENSG00000099797	TECR	-0.533492	2.09627	-3.25853	0.00126942	0.00606314	-1.64635
ENSG00000099800	TIMM13	-0.0453058	-0.233801	-0.210941	0.833099	0.889675	-6.42817
ENSG00000099804	CDC34	-0.146104	1.63753	-1.05721	0.291399	0.424821	-6.20703
ENSG00000099810	MTAP	-0.300732	0.365195	-1.70344	0.0896831	0.17348	-5.16941
ENSG00000099812	MISP	-0.508627	-0.431116	-2.17409	0.0306029	0.0762092	-4.15162
ENSG00000099817	POLR2E	-0.727863	2.17717	-4.88047	1.85038e-06	2.76406e-05	4.48561
ENSG00000099821	POLRMT	-0.540632	-0.135537	-2.92244	0.00377932	0.0145157	-2.39022
ENSG00000099860	GADD45B	0.275015	5.20193	1.87966	0.0612751	0.129552	-5.09689
ENSG00000099875	MKNK2	-0.613817	3.73965	-3.50022	0.000547046	0.00306147	-0.901268
ENSG00000099899	TRMT2A	-0.337762	1.12107	-1.96579	0.050389	0.111759	-4.81348
ENSG00000099901	RANBP1	-0.274515	1.17766	-1.59796	0.111268	0.205463	-5.45694
ENSG00000099904	ZDHHC8	-1.16711	-0.0489122	-6.80808	6.84312e-11	3.84935e-09	14.3864
ENSG00000099910	KLHL22	-0.12629	0.689393	-0.859065	0.391098	0.52594	-6.27418
ENSG00000099917	MED15	-0.00634121	3.33335	-0.0666952	0.946876	0.967297	-6.83211
ENSG00000099940	SNAP29	0.119273	0.916593	1.02841	0.304715	0.438973	-6.12109
ENSG00000099942	CRKL	0.0490506	1.23667	0.420761	0.674278	0.773342	-6.61543
ENSG00000099949	LZTR1	-0.298761	0.971776	-2.0309	0.0432848	0.0993693	-4.66393
ENSG00000099956	SMARCB1	-0.191894	1.86833	-1.79567	0.0737105	0.148873	-5.18877
ENSG00000099968	BCL2L13	0.339059	1.38495	2.30938	0.0217087	0.0581181	-4.09241
ENSG00000099977	DDT	0.211428	1.16971	1.1702	0.242994	0.3708	-6.01286
ENSG00000099985	OSM	0.193974	4.99449	0.788284	0.43125	0.565277	-6.53199
ENSG00000099991	CABIN1	-0.181631	1.32014	-1.18313	0.23784	0.365143	-6.03766
ENSG00000099992	TBC1D10A	-0.627835	0.401444	-4.14606	4.58523e-05	0.000399796	1.57608
ENSG00000099995	SF3A1	-0.297603	3.26512	-2.43716	0.0154759	0.0447546	-3.92192
ENSG00000099998	GGT5	0.632092	0.287249	2.61638	0.00940784	0.0302353	-3.17018
ENSG00000100014	SPECC1L	0.601685	1.05655	3.51259	0.000523311	0.00295892	-0.689745
ENSG00000100023	PPIL2	-0.442823	0.584446	-2.51757	0.0124198	0.0375264	-3.54109
ENSG00000100024	UPB1	0.546689	1.1838	1.93309	0.0543134	0.118393	-4.82842
ENSG00000100028	SNRPD3	-0.166629	0.877907	-0.930084	0.353192	0.488044	-6.23992
ENSG00000100029	PES1	-0.294503	0.918882	-2.01212	0.0452411	0.103043	-4.69091
ENSG00000100030	MAPK1	-0.0270148	2.95275	-0.207006	0.836168	0.891405	-6.80434
ENSG00000100031	GGT1	-0.132569	1.6362	-0.666782	0.505504	0.633183	-6.53715
ENSG00000100034	PPM1F	-0.216414	1.91379	-1.37087	0.1716	0.287528	-5.85388
ENSG00000100055	CYTH4	0.1761	5.08947	1.16176	0.2464	0.374546	-6.17123
ENSG00000100060	MFNG	-0.45266	0.834018	-2.36791	0.0186229	0.0516551	-3.95008
ENSG00000100075	SLC25A1	-0.803977	0.501821	-5.23583	3.39626e-07	6.68656e-06	6.20544
ENSG00000100077	GRK3	-0.00295185	0.436217	-0.0184114	0.985325	0.990153	-6.58388
ENSG00000100083	GGA1	-0.101266	3.18944	-0.802632	0.422922	0.557478	-6.51366
ENSG00000100084	HIRA	0.0726762	0.0121571	0.413005	0.679944	0.777485	-6.39665
ENSG00000100092	SH3BP1	0.0674502	2.04727	0.517078	0.605542	0.719227	-6.64916
ENSG00000100097	LGALS1	-0.422699	5.38053	-2.37336	0.018356	0.0511309	-4.06921
ENSG00000100099	HPS4	-0.103081	0.347198	-0.779377	0.436468	0.570596	-6.27213
ENSG00000100100	PIK3IP1	0.563541	1.93072	3.64548	0.000322421	0.00198494	-0.329483
ENSG00000100106	TRIOBP	-0.0351232	1.91545	-0.354277	0.723419	0.808324	-6.71175
ENSG00000100109	TFIP11	0.0390764	1.84522	0.31579	0.752416	0.831449	-6.71759
ENSG00000100121	GGTLC2	0.274364	0.736086	0.993705	0.321293	0.455736	-6.10479
ENSG00000100124	ANKRD54	-0.474229	0.0234753	-2.72058	0.00695755	0.0238642	-2.95681
ENSG00000100129	EIF3L	-0.422161	2.21233	-2.86122	0.0045641	0.0169415	-2.81044
ENSG00000100138	SNU13	-0.372798	1.2866	-2.2676	0.0241764	0.0633971	-4.20939
ENSG00000100139	MICALL1	-0.245576	1.00174	-1.84183	0.0666422	0.137879	-5.0245
ENSG00000100142	POLR2F	-0.274065	1.52775	-1.69933	0.0904558	0.1747	-5.32897
ENSG00000100150	DEPDC5	-0.0502176	1.25196	-0.322997	0.746958	0.826979	-6.65698
ENSG00000100151	PICK1	-0.61704	-0.11353	-3.28152	0.00117413	0.00567563	-1.34153
ENSG00000100162	CENPM	-0.917794	-0.359722	-3.5086	0.000530864	0.00299132	-0.592825
ENSG00000100201	DDX17	-0.0490068	4.66494	-0.555248	0.579203	0.696708	-6.6882
ENSG00000100207	TCF20	0.0763637	0.569119	0.562694	0.574129	0.693123	-6.44721
ENSG00000100211	CBY1	-0.673858	-0.249358	-3.22039	0.00144343	0.00673418	-1.52103
ENSG00000100216	TOMM22	-0.364625	0.129658	-2.58496	0.0102857	0.0323182	-3.30124
ENSG00000100219	XBP1	-0.0249956	3.60225	-0.160217	0.872835	0.918165	-6.82502
ENSG00000100220	RTCB	0.483137	1.20769	2.3015	0.0221563	0.0590962	-4.0664
ENSG00000100221	JOSD1	-0.208379	3.09885	-1.27436	0.203676	0.326333	-6.02884
ENSG00000100225	FBXO7	0.136163	1.52031	0.984385	0.325843	0.460135	-6.25132
ENSG00000100226	GTPBP1	0.590415	5.15488	3.69068	0.000272568	0.0017244	-0.253212
ENSG00000100227	POLDIP3	0.0679166	1.38417	0.520988	0.602819	0.717032	-6.58478
ENSG00000100239	PPP6R2	-0.103569	1.50133	-1.03594	0.301193	0.435133	-6.20988
ENSG00000100241	SBF1	-0.312115	1.66535	-2.65575	0.00840322	0.0275922	-3.31841
ENSG00000100242	SUN2	0.337734	5.12074	2.52769	0.012076	0.0367583	-3.70767
ENSG00000100243	CYB5R3	-0.609814	2.42466	-5.42217	1.34751e-07	3.05988e-06	6.98851
ENSG00000100258	LMF2	0.146927	1.50376	1.17064	0.242819	0.370652	-6.04928
ENSG00000100263	RHBDD3	-0.194453	-0.327851	-1.03986	0.299374	0.433434	-5.90479
ENSG00000100266	PACSIN2	-0.00868285	3.89617	-0.0802358	0.936112	0.960405	-6.83711
ENSG00000100280	AP1B1	-0.101582	1.95317	-0.856812	0.39234	0.526902	-6.41427
ENSG00000100281	HMGXB4	0.102775	0.330258	0.77663	0.438085	0.572026	-6.25107
ENSG00000100284	TOM1	0.341184	5.3162	2.67563	0.00793363	0.026358	-3.3336
ENSG00000100288	CHKB	0.0340357	2.0972	0.274017	0.78429	0.853868	-6.74593
ENSG00000100292	HMOX1	-0.614868	4.20437	-2.93489	0.0036357	0.0140462	-2.63621
ENSG00000100296	THOC5	0.199864	1.70704	1.42937	0.154101	0.264972	-5.73444
ENSG00000100297	MCM5	-0.154814	0.836377	-0.871577	0.384245	0.519677	-6.28481
ENSG00000100299	ARSA	-0.345126	1.37796	-2.78225	0.00579494	0.0205495	-2.96664
ENSG00000100300	TSPO	-0.520836	4.35259	-2.88675	0.00422028	0.0159247	-2.77096
ENSG00000100304	TTLL12	-0.36338	-0.134157	-2.73859	0.00659792	0.0229181	-2.85818
ENSG00000100307	CBX7	-0.450375	-0.367012	-2.68404	0.00774206	0.0258875	-2.98153
ENSG00000100316	RPL3	-0.645386	4.58951	-4.10337	5.45669e-05	0.000464267	1.25397
ENSG00000100319	ZMAT5	0.225668	-0.203063	1.49672	0.135681	0.240267	-5.34922
ENSG00000100325	ASCC2	-0.0238815	2.1403	-0.161008	0.872212	0.917971	-6.77838
ENSG00000100330	MTMR3	0.310196	3.12637	2.44762	0.015044	0.0436981	-3.8877
ENSG00000100335	MIEF1	-0.61792	-0.150993	-3.78761	0.000189083	0.00125766	0.335728
ENSG00000100336	APOL4	0.945202	0.532991	3.52946	0.000492486	0.00282305	-0.5488
ENSG00000100342	APOL1	1.26666	2.61482	5.04142	8.68203e-07	1.47865e-05	5.23978
ENSG00000100345	MYH9	-0.26249	5.71354	-2.81489	0.00525362	0.0189856	-2.9585
ENSG00000100348	TXN2	-0.0493345	1.06896	-0.368977	0.712446	0.801522	-6.62376
ENSG00000100353	EIF3D	-0.128115	2.50289	-1.26791	0.205966	0.328434	-6.01803
ENSG00000100354	TNRC6B	0.150252	1.85673	1.06655	0.287168	0.419661	-6.20159
ENSG00000100359	SGSM3	-0.26936	1.19226	-1.56901	0.117864	0.214839	-5.50164
ENSG00000100360	IFT27	-1.00822	-0.546533	-4.9497	1.33935e-06	2.13689e-05	4.99371
ENSG00000100364	KIAA0930	-0.299775	2.53671	-2.12005	0.0349513	0.0846188	-4.60501
ENSG00000100365	NCF4	0.42845	4.04703	3.12781	0.00196195	0.00862205	-2.07439
ENSG00000100368	CSF2RB	0.920099	5.20043	6.38984	7.65445e-10	3.2201e-08	11.9625
ENSG00000100376	FAM118A	0.1041	1.14458	0.570128	0.569084	0.68923	-6.52862
ENSG00000100379	KCTD17	-0.312965	-0.0152737	-1.63367	0.103542	0.194368	-5.20636
ENSG00000100380	ST13	-0.270511	2.76833	-2.15533	0.0320562	0.0789693	-4.54181
ENSG00000100385	IL2RB	0.861774	0.400572	2.96573	0.00330104	0.0130819	-2.24
ENSG00000100387	RBX1	0.0177022	0.680223	0.0982084	0.921843	0.951517	-6.61829
ENSG00000100393	EP300	0.37949	3.37149	3.01751	0.00280218	0.0114649	-2.39064
ENSG00000100401	RANGAP1	-0.0180432	0.820152	-0.120772	0.903965	0.939326	-6.65203
ENSG00000100410	PHF5A	-0.0527292	0.616653	-0.326402	0.744383	0.825043	-6.55629
ENSG00000100412	ACO2	-0.558164	1.36277	-3.96474	9.50761e-05	0.000718288	0.808575
ENSG00000100413	POLR3H	-0.56326	-0.319562	-3.18848	0.00160577	0.00731816	-1.59835
ENSG00000100416	TRMU	-0.515358	0.389574	-3.35947	0.000898318	0.00457952	-1.16858
ENSG00000100418	DESI1	0.05381	0.770447	0.340072	0.734078	0.816896	-6.58331
ENSG00000100422	CERK	-0.12449	1.40924	-0.788289	0.431247	0.565277	-6.42243
ENSG00000100425	BRD1	-0.0433858	0.949286	-0.326771	0.744105	0.824884	-6.61569
ENSG00000100429	HDAC10	-0.367812	0.960295	-2.90306	0.00401327	0.0152712	-2.5951
ENSG00000100439	ABHD4	-0.19452	0.742401	-0.999456	0.318505	0.453027	-6.16526
ENSG00000100441	KHNYN	-0.00704835	1.61828	-0.0650206	0.948208	0.967571	-6.74427
ENSG00000100445	SDR39U1	-0.0927442	-0.319794	-0.404155	0.686432	0.781997	-6.36823
ENSG00000100453	GZMB	2.96109	1.82308	6.29398	1.31186e-09	5.29261e-08	11.5666
ENSG00000100461	RBM23	0.149823	3.74374	1.12872	0.260058	0.390008	-6.20769
ENSG00000100462	PRMT5	-0.0449104	1.37454	-0.269929	0.78743	0.855947	-6.68604
ENSG00000100478	AP4S1	-0.272345	0.504647	-1.8049	0.0722496	0.146552	-5.02052
ENSG00000100485	SOS2	0.354823	1.84457	2.56814	0.0107853	0.033562	-3.52285
ENSG00000100490	CDKL1	-1.04233	0.613853	-3.22085	0.00144122	0.00673024	-1.65514
ENSG00000100503	NIN	0.131176	3.17673	1.09816	0.273151	0.404103	-6.23277
ENSG00000100504	PYGL	-0.0818722	3.61197	-0.448809	0.653944	0.756363	-6.73808
ENSG00000100519	PSMC6	0.150142	2.01784	1.29857	0.195244	0.316428	-5.94202
ENSG00000100523	DDHD1	-0.0443463	0.295698	-0.259183	0.795699	0.86265	-6.54057
ENSG00000100528	CNIH1	0.122587	1.02253	0.700405	0.484302	0.613416	-6.43372
ENSG00000100554	ATP6V1D	0.115818	2.75013	1.05175	0.293891	0.427371	-6.27077
ENSG00000100564	PIGH	0.0333825	1.01891	0.242757	0.808386	0.872251	-6.64221
ENSG00000100567	PSMA3	0.521174	3.04555	4.26331	2.82273e-05	0.000266159	1.89232
ENSG00000100568	VTI1B	-0.292918	0.967133	-2.0752	0.0389537	0.0916711	-4.57818
ENSG00000100578	KIAA0586	-0.0713243	0.157805	-0.394536	0.69351	0.786759	-6.43607
ENSG00000100591	AHSA1	-0.292771	2.56147	-1.77362	0.0772988	0.154378	-5.2679
ENSG00000100592	DAAM1	-0.735501	-0.00399473	-3.80648	0.000175937	0.00118729	0.374951
ENSG00000100596	SPTLC2	0.876367	2.37502	4.61992	6.05197e-06	7.46644e-05	3.39022
ENSG00000100599	AL159141.1	-0.0788292	3.13093	-0.57685	0.564541	0.685837	-6.66588
ENSG00000100600	LGMN	0.569599	3.21482	2.68733	0.00766827	0.0257194	-3.28948
ENSG00000100603	SNW1	0.144887	1.79056	1.19551	0.232978	0.359924	-6.05089
ENSG00000100605	ITPK1	0.162865	2.75286	1.28678	0.199318	0.321391	-5.99723
ENSG00000100612	DHRS7	0.104154	2.60721	0.800265	0.424289	0.558756	-6.4946
ENSG00000100614	PPM1A	0.245009	2.0809	1.92663	0.0551184	0.119666	-4.95169
ENSG00000100632	ERH	0.128152	1.99496	0.725925	0.468539	0.600013	-6.5108
ENSG00000100644	HIF1A	0.51527	5.84655	3.50046	0.000546584	0.00306147	-0.893427
ENSG00000100647	SUSD6	0.599585	4.07525	4.50023	1.02564e-05	0.000115652	2.83491
ENSG00000100650	SRSF5	0.0814789	4.06602	0.681322	0.496275	0.624723	-6.61056
ENSG00000100664	EIF5	-0.0171259	4.02504	-0.167497	0.86711	0.91488	-6.82708
ENSG00000100697	DICER1	0.330217	2.65068	2.63828	0.0088366	0.0288229	-3.40112
ENSG00000100711	ZFYVE21	-0.79997	-0.021852	-4.35429	1.92315e-05	0.00019142	2.44171
ENSG00000100714	MTHFD1	-0.573479	0.417505	-3.10432	0.00211848	0.00920722	-1.96126
ENSG00000100722	ZC3H14	-0.01058	0.901153	-0.0634429	0.949463	0.968751	-6.66378
ENSG00000100726	TELO2	-0.508856	0.102247	-3.19977	0.00154654	0.00711741	-1.62112
ENSG00000100731	PCNX1	0.148758	4.08853	1.17045	0.242894	0.370706	-6.16276
ENSG00000100744	GSKIP	0.328828	0.117808	1.78776	0.0749826	0.150947	-4.92906
ENSG00000100749	VRK1	0.129984	0.554997	0.697214	0.486293	0.615304	-6.34897
ENSG00000100764	PSMC1	-0.0896233	2.61707	-0.783042	0.434317	0.5684	-6.51301
ENSG00000100767	PAPLN	0.0745786	-0.206027	0.433792	0.6648	0.765145	-6.34809
ENSG00000100796	PPP4R3A	0.23654	2.20854	2.11539	0.0353503	0.0852495	-4.58549
ENSG00000100802	C14orf93	0.471827	-0.116333	2.11686	0.0352243	0.0851124	-4.22858
ENSG00000100804	PSMB5	-0.0308255	0.70424	-0.181662	0.85599	0.907495	-6.62109
ENSG00000100811	YY1	0.00312559	1.74588	0.0257433	0.979482	0.987016	-6.76144
ENSG00000100813	ACIN1	0.131147	3.45717	1.31964	0.188118	0.307672	-5.97386
ENSG00000100815	TRIP11	0.577217	0.328866	3.8117	0.000172458	0.0011692	0.432119
ENSG00000100823	APEX1	-0.562998	0.733819	-3.04763	0.00254476	0.0106327	-2.16593
ENSG00000100836	PABPN1	0.0322191	2.29921	0.301035	0.763629	0.839027	-6.7538
ENSG00000100852	ARHGAP5	-0.210251	0.109655	-1.184	0.237498	0.364675	-5.84797
ENSG00000100865	CINP	-0.19778	0.648012	-1.46185	0.144992	0.253203	-5.57865
ENSG00000100883	SRP54	0.610079	2.08789	4.54345	8.4882e-06	9.86516e-05	3.07398
ENSG00000100888	CHD8	0.167948	2.01399	1.89473	0.0592399	0.126197	-5.00854
ENSG00000100889	PCK2	0.0883231	0.803258	0.53058	0.596164	0.710919	-6.49689
ENSG00000100890	PRORP	-0.0797753	0.161258	-0.488541	0.625579	0.735571	-6.40246
ENSG00000100897	DCAF11	0.19327	2.0733	1.87361	0.0621088	0.130669	-5.04971
ENSG00000100902	PSMA6	0.190805	3.70805	1.52127	0.129411	0.23158	-5.69433
ENSG00000100906	NFKBIA	0.725584	7.84805	4.33629	2.07591e-05	0.000203133	2.19308
ENSG00000100908	EMC9	0.460403	-0.472703	2.09283	0.0373362	0.0887342	-4.23002
ENSG00000100911	PSME2	0.680374	3.63222	3.91293	0.000116552	0.000853673	0.547776
ENSG00000100918	REC8	0.841333	2.80037	5.59254	5.66828e-08	1.43811e-06	7.83399
ENSG00000100926	TM9SF1	-0.174443	1.36843	-1.35817	0.175591	0.292474	-5.81624
ENSG00000100934	SEC23A	-0.525481	1.59512	-4.03471	7.19744e-05	0.00057603	1.05202
ENSG00000100938	GMPR2	0.292565	3.16499	2.41488	0.0164325	0.0469293	-3.96583
ENSG00000100941	PNN	0.0622034	1.50728	0.427629	0.669276	0.769308	-6.64278
ENSG00000100949	RABGGTA	-0.00613757	1.03164	-0.0432617	0.965526	0.979254	-6.6828
ENSG00000100979	PLTP	-0.407294	0.856332	-1.71839	0.0869195	0.169165	-5.23013
ENSG00000100982	PCIF1	0.00482574	1.05051	0.0397393	0.968332	0.980305	-6.67394
ENSG00000100983	GSS	-0.748686	0.903065	-5.23369	3.43211e-07	6.73021e-06	6.16378
ENSG00000100985	MMP9	0.456648	3.17122	1.51368	0.131325	0.234493	-5.69073
ENSG00000100991	TRPC4AP	0.295933	2.14567	2.60324	0.00976643	0.0311034	-3.46325
ENSG00000100994	PYGB	-0.41881	0.342974	-2.58338	0.0103319	0.0324218	-3.34129
ENSG00000100997	ABHD12	-0.368636	1.75793	-2.1899	0.0294225	0.0738112	-4.42091
ENSG00000101000	PROCR	-0.322226	-0.0326373	-1.26638	0.206512	0.329064	-5.74369
ENSG00000101017	CD40	0.384202	1.31024	2.05964	0.0404307	0.0943799	-4.61309
ENSG00000101019	UQCC1	-0.316863	0.179585	-1.74694	0.0818307	0.161076	-5.07411
ENSG00000101040	ZMYND8	0.112569	0.394973	0.647094	0.518144	0.644758	-6.36067
ENSG00000101052	IFT52	0.337681	-0.448613	1.46277	0.14474	0.252852	-5.33547
ENSG00000101084	RAB5IF	0.448983	3.73993	3.39775	0.00078621	0.00410581	-1.23212
ENSG00000101104	PABPC1L	-0.126875	1.24123	-0.937967	0.349134	0.483732	-6.27449
ENSG00000101109	STK4	0.325939	3.36829	2.55249	0.0112692	0.0348004	-3.63887
ENSG00000101126	ADNP	0.273256	0.779649	1.8103	0.0714063	0.145232	-5.00896
ENSG00000101138	CSTF1	0.0407274	0.511224	0.255828	0.798286	0.864598	-6.55074
ENSG00000101146	RAE1	0.35513	0.00112795	2.31959	0.0211402	0.056968	-3.84879
ENSG00000101150	TPD52L2	0.159764	3.5972	1.39338	0.164696	0.278234	-5.877
ENSG00000101152	DNAJC5	0.118121	2.53723	0.987088	0.324519	0.458858	-6.32573
ENSG00000101158	NELFCD	-0.126012	1.45059	-1.24879	0.212866	0.33716	-5.96696
ENSG00000101160	CTSZ	-0.364541	5.00045	-2.10439	0.0363069	0.0870022	-4.65908
ENSG00000101161	PRPF6	-0.0875784	0.902098	-0.77444	0.439376	0.573037	-6.36863
ENSG00000101166	PRELID3B	-0.0299181	1.15279	-0.221526	0.824857	0.883846	-6.67138
ENSG00000101181	MTG2	-0.196486	1.07276	-1.46506	0.144116	0.25203	-5.64565
ENSG00000101182	PSMA7	-0.30423	3.58858	-2.29108	0.0227608	0.0604253	-4.26059
ENSG00000101187	SLCO4A1	0.945891	2.45934	4.06777	6.30201e-05	0.000520881	1.17467
ENSG00000101191	DIDO1	0.0419071	0.838563	0.415097	0.678414	0.776457	-6.56172
ENSG00000101193	GID8	-0.210311	0.0518915	-1.24001	0.216092	0.341062	-5.78176
ENSG00000101199	ARFGAP1	-0.255683	1.8525	-2.18204	0.0300041	0.0750979	-4.43972
ENSG00000101224	CDC25B	0.388805	-0.207766	1.86344	0.0635301	0.132779	-4.72235
ENSG00000101236	RNF24	0.838493	2.74269	5.01962	9.62962e-07	1.60668e-05	5.12107
ENSG00000101246	ARFRP1	0.0684082	1.13665	0.475853	0.63458	0.742518	-6.57337
ENSG00000101255	TRIB3	0.105667	0.563067	0.530217	0.596415	0.711132	-6.45195
ENSG00000101265	RASSF2	0.658647	3.53587	3.81924	0.000167544	0.00114614	0.209646
ENSG00000101266	CSNK2A1	-0.461777	1.66419	-3.80643	0.00017597	0.00118729	0.209941
ENSG00000101290	CDS2	0.699199	2.05598	4.81501	2.50366e-06	3.57304e-05	4.23967
ENSG00000101294	HM13	0.485282	3.98837	3.86561	0.000140121	0.000990911	0.36934
ENSG00000101307	SIRPB1	0.132333	3.86607	0.723999	0.469719	0.601289	-6.57975
ENSG00000101310	SEC23B	-0.0937298	1.88083	-0.78627	0.432427	0.566442	-6.46736
ENSG00000101336	HCK	0.444084	5.28271	3.51873	0.000511891	0.00290435	-0.837912
ENSG00000101337	TM9SF4	-0.0450248	1.95535	-0.327294	0.743709	0.824538	-6.72662
ENSG00000101342	TLDC2	1.54611	-0.192583	4.52818	9.07651e-06	0.000104948	3.282
ENSG00000101343	CRNKL1	0.585266	0.119391	3.43307	0.000694482	0.00370742	-0.798961
ENSG00000101347	SAMHD1	0.429243	4.31882	2.35903	0.0190645	0.0526575	-4.10826
ENSG00000101350	KIF3B	-0.00870866	0.235652	-0.0700147	0.944236	0.96572	-6.54394
ENSG00000101361	NOP56	0.0284564	1.62869	0.180329	0.857035	0.908315	-6.73215
ENSG00000101363	MANBAL	-0.0525653	0.0555203	-0.354616	0.723166	0.808293	-6.44173
ENSG00000101365	IDH3B	0.0517409	0.973187	0.362466	0.717299	0.804581	-6.6046
ENSG00000101367	MAPRE1	-0.0339339	2.88636	-0.297619	0.766232	0.840704	-6.78038
ENSG00000101384	JAG1	0.273985	0.631149	1.7471	0.0818032	0.161054	-5.10496
ENSG00000101413	RPRD1B	0.00627765	1.11737	0.0457826	0.963519	0.978486	-6.69012
ENSG00000101421	CHMP4B	0.282675	3.84146	2.38207	0.0179367	0.050176	-4.05317
ENSG00000101425	BPI	-0.0188276	-0.260107	-0.0816187	0.935013	0.959577	-6.43992
ENSG00000101439	CST3	-0.452385	4.96611	-2.38839	0.0176382	0.0494816	-4.03784
ENSG00000101443	WFDC2	-0.467805	3.09206	-1.12507	0.261598	0.391601	-6.20711
ENSG00000101444	AHCY	-0.395395	0.399359	-2.66196	0.00825395	0.0272201	-3.17259
ENSG00000101445	PPP1R16B	0.537163	-0.556914	2.00076	0.0464601	0.10526	-4.37341
ENSG00000101457	DNTTIP1	0.207348	2.17453	1.40083	0.162461	0.275926	-5.81455
ENSG00000101460	MAP1LC3A	-0.183537	1.62387	-0.916865	0.360065	0.494418	-6.3383
ENSG00000101473	ACOT8	0.108374	-0.0789743	0.663287	0.507736	0.635412	-6.26875
ENSG00000101474	APMAP	-0.0681542	2.19523	-0.417456	0.676691	0.774665	-6.70596
ENSG00000101493	ZNF516	0.0783675	1.93492	0.507763	0.612051	0.724598	-6.64027
ENSG00000101544	ADNP2	0.190528	1.23511	0.862361	0.389285	0.524589	-6.31878
ENSG00000101557	USP14	-0.191828	0.373144	-1.35848	0.175493	0.292359	-5.67919
ENSG00000101558	VAPA	-0.302848	4.00442	-2.62785	0.00910468	0.0295018	-3.45949
ENSG00000101577	LPIN2	0.17155	2.22866	1.10709	0.26928	0.399757	-6.18232
ENSG00000101596	SMCHD1	1.01593	4.88701	5.91939	1.01956e-08	3.17614e-07	9.45924
ENSG00000101608	MYL12A	0.552023	5.671	4.98227	1.14906e-06	1.88209e-05	4.92204
ENSG00000101654	RNMT	0.205933	0.621811	1.2002	0.231158	0.357674	-5.894
ENSG00000101665	SMAD7	-0.0451586	0.908934	-0.304814	0.760752	0.836773	-6.6163
ENSG00000101745	ANKRD12	0.565541	3.59573	4.48069	1.11677e-05	0.000123954	2.75875
ENSG00000101751	POLI	0.247208	0.251873	1.27392	0.203834	0.326437	-5.73333
ENSG00000101773	RBBP8	0.277612	0.548639	1.5006	0.134674	0.239	-5.46451
ENSG00000101782	RIOK3	-0.105317	2.51683	-0.909233	0.364071	0.498736	-6.4028
ENSG00000101843	PSMD10	-0.295612	0.743264	-1.70999	0.0884642	0.171527	-5.22316
ENSG00000101849	TBL1X	-0.0989083	1.93683	-0.711235	0.477578	0.608186	-6.53027
ENSG00000101856	PGRMC1	-0.207243	-0.0216504	-1.16323	0.245805	0.373815	-5.84023
ENSG00000101882	NKAP	0.106969	0.307162	0.706647	0.48042	0.610418	-6.29278
ENSG00000101901	ALG13	0.23974	1.58569	1.19448	0.23338	0.360318	-6.0192
ENSG00000101911	PRPS2	0.0737756	0.171256	0.377995	0.705743	0.796439	-6.44835
ENSG00000101916	TLR8	1.19769	2.20807	5.35245	1.90967e-07	4.14985e-06	6.71239
ENSG00000101940	WDR13	-0.340899	2.03721	-2.37352	0.0183484	0.0511241	-4.03068
ENSG00000101966	XIAP	0.637819	2.09923	3.82731	0.00016243	0.00111737	0.297602
ENSG00000101972	STAG2	0.275976	3.19435	2.08052	0.0384593	0.0907246	-4.69819
ENSG00000101974	ATP11C	0.741867	0.264588	3.96156	9.62798e-05	0.000726267	1.00283
ENSG00000101986	ABCD1	0.532105	1.06973	3.52694	0.000496992	0.00283946	-0.645287
ENSG00000102007	PLP2	0.260549	3.62486	1.56681	0.118378	0.215559	-5.62308
ENSG00000102030	NAA10	0.0912869	1.73781	0.687732	0.492236	0.620989	-6.52062
ENSG00000102032	RENBP	0.34443	2.88982	2.1131	0.0355478	0.0855998	-4.62186
ENSG00000102034	ELF4	0.671292	2.35436	5.1397	5.42022e-07	9.82432e-06	5.68122
ENSG00000102054	RBBP7	0.0270733	0.869502	0.177528	0.859232	0.909102	-6.63351
ENSG00000102081	FMR1	0.400348	2.9432	2.93144	0.0036749	0.0141921	-2.62521
ENSG00000102096	PIM2	0.888813	3.06435	4.67244	4.78533e-06	6.17389e-05	3.58202
ENSG00000102100	SLC35A2	0.185708	0.797566	1.02608	0.305809	0.440244	-6.1127
ENSG00000102103	PQBP1	0.106657	1.29926	0.721426	0.471297	0.602824	-6.45232
ENSG00000102119	EMD	-0.328561	2.30557	-1.97908	0.0488649	0.1092	-4.88157
ENSG00000102125	TAZ	-0.240158	0.855611	-1.81625	0.0704867	0.143778	-5.04885
ENSG00000102144	PGK1	0.00161277	4.39266	0.0141836	0.988694	0.992425	-6.84164
ENSG00000102158	MAGT1	-0.072433	1.42591	-0.627873	0.530639	0.655501	-6.54004
ENSG00000102172	SMS	-0.293779	1.50268	-2.2613	0.0245692	0.0640595	-4.24277
ENSG00000102181	CD99L2	-0.496537	0.321265	-3.74866	0.000219215	0.00142439	0.146854
ENSG00000102189	EEA1	-0.149928	0.101053	-1.00059	0.31796	0.452769	-6.04506
ENSG00000102218	RP2	0.656297	1.95367	4.74755	3.40806e-06	4.64023e-05	3.95383
ENSG00000102225	CDK16	-0.13597	1.85793	-1.05504	0.292387	0.425715	-6.22265
ENSG00000102226	USP11	-0.248987	1.03945	-1.75122	0.0810896	0.160098	-5.18912
ENSG00000102265	TIMP1	-0.195713	6.78251	-1.02865	0.3046	0.438888	-6.29195
ENSG00000102316	MAGED2	-0.060408	1.00753	-0.33797	0.735659	0.818194	-6.62696
ENSG00000102317	RBM3	-0.075872	2.53999	-0.474842	0.635299	0.742748	-6.70173
ENSG00000102390	PBDC1	-0.0892201	-0.0768286	-0.462809	0.64389	0.749137	-6.38332
ENSG00000102393	GLA	0.602543	2.98966	3.44178	0.00067345	0.00362859	-1.07115
ENSG00000102401	ARMCX3	0.0916331	1.53526	0.709878	0.478417	0.608546	-6.48544
ENSG00000102445	RUBCNL	-0.408824	2.6847	-1.76936	0.0780087	0.155449	-5.2794
ENSG00000102524	TNFSF13B	1.6048	3.96662	7.06823	1.44871e-11	9.97277e-10	15.8198
ENSG00000102531	FNDC3A	0.409809	2.38996	3.28956	0.00114243	0.00555912	-1.53645
ENSG00000102543	CDADC1	0.830382	0.555788	3.99407	8.46443e-05	0.000655577	1.09308
ENSG00000102547	CAB39L	0.0660043	-0.290825	0.291771	0.770695	0.843768	-6.37816
ENSG00000102554	KLF5	-0.266241	1.4351	-1.05589	0.292001	0.425341	-6.19663
ENSG00000102572	STK24	0.0540185	2.93135	0.452764	0.651097	0.754454	-6.72146
ENSG00000102575	ACP5	-1.32929	2.64385	-5.53061	7.78312e-08	1.88248e-06	7.50755
ENSG00000102580	DNAJC3	0.113745	2.12754	0.834527	0.404752	0.539742	-6.44147
ENSG00000102595	UGGT2	-0.363051	0.0354669	-1.75861	0.0798223	0.158039	-5.03503
ENSG00000102606	ARHGEF7	-0.192495	1.4995	-1.66394	0.0973329	0.184756	-5.38194
ENSG00000102699	PARP4	0.436914	2.36262	2.86205	0.00455241	0.0169084	-2.78743
ENSG00000102710	SUPT20H	0.127114	1.74678	0.926895	0.354843	0.489387	-6.32823
ENSG00000102755	FLT1	0.11276	0.907426	0.653275	0.514158	0.641411	-6.44765
ENSG00000102760	RGCC	-0.755341	3.03408	-3.17549	0.00167662	0.00759881	-1.9253
ENSG00000102786	INTS6	-0.00543895	2.30214	-0.0466961	0.962791	0.978093	-6.79833
ENSG00000102794	ACOD1	2.77496	1.76954	5.5709	6.33428e-08	1.59068e-06	7.86989
ENSG00000102796	DHRS12	-0.0444844	0.832092	-0.221827	0.824623	0.883692	-6.62706
ENSG00000102804	TSC22D1	-0.366035	1.25384	-2.04802	0.0415647	0.0962056	-4.6723
ENSG00000102805	CLN5	-0.269713	1.76351	-1.52908	0.127464	0.228887	-5.62294
ENSG00000102854	MSLN	-1.1424	-0.146513	-4.3198	2.22592e-05	0.000215882	2.31203
ENSG00000102858	MGRN1	-0.156308	3.1273	-1.40126	0.162331	0.2758	-5.8614
ENSG00000102871	TRADD	-0.0499182	0.882041	-0.368737	0.712624	0.801631	-6.59482
ENSG00000102879	CORO1A	0.411009	5.21994	2.91985	0.00380981	0.014594	-2.6771
ENSG00000102882	MAPK3	-0.172517	2.38565	-1.35722	0.17589	0.292811	-5.89861
ENSG00000102886	GDPD3	-0.510498	-0.482045	-2.54276	0.0115799	0.0355161	-3.30072
ENSG00000102893	PHKB	-0.0084073	1.62102	-0.0689326	0.945096	0.966099	-6.74922
ENSG00000102897	LYRM1	0.696056	2.32807	4.92169	1.52711e-06	2.37111e-05	4.69623
ENSG00000102898	NUTF2	-0.497636	1.09639	-3.07477	0.00233171	0.00994084	-2.12504
ENSG00000102900	NUP93	-0.45595	1.02064	-3.10777	0.00209477	0.00911625	-2.01335
ENSG00000102901	CENPT	-0.402296	0.177541	-2.48263	0.0136749	0.0405225	-3.55722
ENSG00000102908	NFAT5	0.153466	2.14701	1.4567	0.146408	0.255177	-5.7374
ENSG00000102910	LONP2	-0.260956	0.386509	-2.15807	0.0318399	0.078601	-4.32051
ENSG00000102921	N4BP1	0.839132	4.25309	5.02615	9.33594e-07	1.57368e-05	5.11874
ENSG00000102931	ARL2BP	-0.571967	0.186891	-2.5692	0.0107531	0.0334979	-3.36851
ENSG00000102974	CTCF	-0.0689509	0.767999	-0.710402	0.478093	0.60829	-6.39192
ENSG00000102978	POLR2C	-0.0598124	1.02877	-0.47623	0.634311	0.742468	-6.57363
ENSG00000103005	USB1	0.195996	3.39644	1.6986	0.0905943	0.174933	-5.40961
ENSG00000103018	CYB5B	-0.0164514	0.581839	-0.105261	0.91625	0.947036	-6.59371
ENSG00000103035	PSMD7	0.101034	1.96056	0.905258	0.366169	0.501121	-6.36583
ENSG00000103042	SLC38A7	0.113697	0.436252	0.658695	0.510676	0.63828	-6.36015
ENSG00000103043	VAC14	-0.256079	1.72346	-1.83311	0.0679325	0.140013	-5.11501
ENSG00000103047	TANGO6	-0.519403	0.233971	-2.42404	0.0160331	0.0460413	-3.72332
ENSG00000103051	COG4	0.158021	0.41645	1.03158	0.30323	0.43749	-6.04469
ENSG00000103056	SMPD3	-0.514727	-0.403788	-2.29216	0.022698	0.0602911	-3.91176
ENSG00000103064	SLC7A6	-0.252856	0.532323	-1.43729	0.151842	0.261958	-5.59955
ENSG00000103066	PLA2G15	-1.20231	0.679689	-6.82374	6.23901e-11	3.63413e-09	14.4508
ENSG00000103091	WDR59	-0.369382	1.09671	-1.99357	0.0472458	0.106437	-4.75813
ENSG00000103111	MON1B	-0.246687	2.00953	-2.11113	0.0357184	0.0859478	-4.59923
ENSG00000103121	CMC2	0.540502	1.65703	2.95033	0.00346442	0.013542	-2.48928
ENSG00000103126	AXIN1	-0.120228	0.572385	-1.02959	0.304161	0.43849	-6.09455
ENSG00000103145	HCFC1R1	-0.234646	0.170282	-1.28345	0.200482	0.3225	-5.74024
ENSG00000103152	MPG	-0.107445	0.0548333	-0.608644	0.543293	0.66755	-6.32464
ENSG00000103160	HSDL1	0.199594	0.614208	1.08687	0.278104	0.409338	-6.00075
ENSG00000103168	TAF1C	0.244168	1.64985	1.01766	0.309787	0.444151	-6.20846
ENSG00000103174	NAGPA	-0.557013	0.25695	-3.30365	0.00108874	0.00534275	-1.33984
ENSG00000103187	COTL1	-0.0730972	5.2998	-0.645843	0.518952	0.645272	-6.6299
ENSG00000103194	USP10	-0.127802	3.26478	-0.887057	0.37587	0.511174	-6.44396
ENSG00000103196	CRISPLD2	0.317603	2.10653	1.98647	0.0480336	0.107783	-4.83172
ENSG00000103197	TSC2	-0.254418	2.40785	-1.87824	0.06147	0.129824	-5.07432
ENSG00000103222	ABCC1	0.169713	1.59958	1.33751	0.182227	0.300727	-5.85367
ENSG00000103226	NOMO3	-0.498018	1.19623	-2.35781	0.0191261	0.0527387	-4.00815
ENSG00000103245	CIAO3	-0.495299	-0.075276	-2.80763	0.00536986	0.0193135	-2.70501
ENSG00000103248	MTHFSD	-0.33801	0.131966	-1.88093	0.0611015	0.129268	-4.81974
ENSG00000103249	CLCN7	0.587019	3.97719	3.07147	0.00235672	0.0100344	-2.23993
ENSG00000103254	ANTKMT	-0.623796	-0.481541	-2.95734	0.00338917	0.013342	-2.24102
ENSG00000103257	SLC7A5	0.691337	3.17497	4.10313	5.46205e-05	0.000464322	1.27126
ENSG00000103264	FBXO31	-1.02658	-0.423027	-5.12376	5.85322e-07	1.04572e-05	5.76492
ENSG00000103266	STUB1	-0.525305	1.09801	-2.83297	0.00497391	0.0182223	-2.81121
ENSG00000103274	NUBP1	-0.17871	0.601377	-1.00909	0.313874	0.448248	-6.12486
ENSG00000103275	UBE2I	0.120761	2.07339	0.966884	0.334503	0.468599	-6.31819
ENSG00000103313	MEFV	0.98454	3.90323	6.34346	9.94047e-10	4.09431e-08	11.7142
ENSG00000103326	CAPN15	-0.360577	1.44533	-2.34952	0.0195481	0.0535635	-4.04366
ENSG00000103335	PIEZO1	-0.243845	1.58419	-1.54058	0.124639	0.224839	-5.58788
ENSG00000103342	GSPT1	-0.285045	1.68448	-2.09295	0.0373248	0.0887342	-4.61352
ENSG00000103351	CLUAP1	-0.739428	-0.323864	-3.32321	0.00101812	0.0050669	-1.18846
ENSG00000103353	UBFD1	-0.219802	0.658681	-1.21459	0.225627	0.352104	-5.9084
ENSG00000103363	ELOB	-0.361941	3.04387	-2.27407	0.0237789	0.062538	-4.29195
ENSG00000103365	GGA2	-0.710224	1.94706	-4.52585	9.16946e-06	0.00010582	2.97314
ENSG00000103381	CPPED1	0.252857	2.20136	1.56066	0.119822	0.217585	-5.57951
ENSG00000103415	HMOX2	-0.872789	0.848603	-6.23956	1.77667e-09	6.94031e-08	11.2129
ENSG00000103423	DNAJA3	-0.575999	0.232912	-3.06499	0.0024065	0.0101979	-2.04862
ENSG00000103429	BFAR	0.151182	1.29059	1.30237	0.193945	0.314945	-5.86664
ENSG00000103479	RBL2	-0.0335527	1.75305	-0.316557	0.751834	0.831019	-6.7122
ENSG00000103490	PYCARD	-0.0925454	3.02606	-0.584809	0.559185	0.681939	-6.65877
ENSG00000103495	MAZ	-0.360538	2.08137	-2.38032	0.0180207	0.0503678	-4.01815
ENSG00000103496	STX4	0.168	4.11216	1.23965	0.216226	0.341219	-6.08037
ENSG00000103502	CDIPT	0.244469	1.24062	1.85854	0.0642256	0.134062	-4.99309
ENSG00000103507	BCKDK	-0.178021	1.97442	-1.43488	0.152525	0.262837	-5.76846
ENSG00000103510	KAT8	-0.296489	1.80753	-2.5231	0.0122309	0.0371037	-3.66173
ENSG00000103512	NOMO1	-0.166389	0.631055	-0.945988	0.345035	0.479668	-6.18368
ENSG00000103534	TMC5	-1.09702	0.298284	-4.2206	3.37246e-05	0.000309976	1.86337
ENSG00000103544	VPS35L	-0.15748	1.45978	-1.06464	0.28803	0.420741	-6.17865
ENSG00000103549	RNF40	-0.180758	2.3175	-1.57945	0.115452	0.211455	-5.57362
ENSG00000103569	AQP9	0.628669	7.04387	4.20011	3.67123e-05	0.000333084	1.64564
ENSG00000103591	AAGAB	0.311855	0.802206	2.04432	0.041932	0.0967602	-4.57472
ENSG00000103642	LACTB	0.861753	2.61464	5.46412	1.09074e-07	2.53836e-06	7.21164
ENSG00000103653	CSK	0.257357	3.64122	2.09807	0.0368666	0.0878729	-4.67019
ENSG00000103657	HERC1	0.00175146	2.03948	0.0150435	0.988009	0.992149	-6.78284
ENSG00000103671	TRIP4	0.290138	1.02268	2.1024	0.0364826	0.0872532	-4.49192
ENSG00000103723	AP3B2	-0.127065	0.535955	-0.558462	0.577011	0.695068	-6.44447
ENSG00000103769	RAB11A	0.327118	3.29448	2.5602	0.0110283	0.0341606	-3.61774
ENSG00000103811	CTSH	-0.158427	4.12687	-1.02049	0.308446	0.442874	-6.32562
ENSG00000103855	CD276	-1.50304	0.894112	-8.07063	2.61937e-14	4.15888e-12	21.9811
ENSG00000103876	FAH	-0.935402	-0.153256	-4.60965	6.33493e-06	7.74671e-05	3.49048
ENSG00000103888	CEMIP	0.787987	0.441349	2.74251	0.00652181	0.0226938	-2.85027
ENSG00000103932	RPAP1	-0.570336	-0.158537	-2.82567	0.00508526	0.0185131	-2.6606
ENSG00000103942	HOMER2	-1.00351	-0.567169	-5.1006	6.54297e-07	1.14811e-05	5.67149
ENSG00000103966	EHD4	-0.248956	1.05288	-1.96689	0.0502616	0.111621	-4.79571
ENSG00000103978	TMEM87A	0.0507438	1.27336	0.44191	0.658922	0.760515	-6.60999
ENSG00000103994	ZNF106	-0.138213	2.32983	-1.20211	0.230417	0.356919	-6.0896
ENSG00000103995	CEP152	-0.262413	-0.379463	-1.19723	0.23231	0.359117	-5.73541
ENSG00000104043	ATP8B4	0.652959	1.29087	3.45839	0.000634992	0.003465	-0.884673
ENSG00000104047	DTWD1	0.0145265	0.917404	0.0788213	0.937236	0.960757	-6.65575
ENSG00000104064	GABPB1	0.296727	1.09678	1.85951	0.0640871	0.133801	-4.97063
ENSG00000104067	TJP1	-0.890282	-0.289178	-4.79812	2.70549e-06	3.80469e-05	4.31001
ENSG00000104081	BMF	-0.0405435	0.485836	-0.213175	0.831358	0.888491	-6.5659
ENSG00000104093	DMXL2	0.724985	3.84163	4.36837	1.81124e-05	0.000183624	2.29912
ENSG00000104129	DNAJC17	-0.1049	0.202089	-0.488176	0.625838	0.735651	-6.43261
ENSG00000104131	EIF3J	0.0973477	1.85447	0.720331	0.47197	0.603307	-6.5107
ENSG00000104133	SPG11	0.291752	3.30944	2.60919	0.00960255	0.0307214	-3.49639
ENSG00000104142	VPS18	0.176128	1.44311	1.27196	0.204525	0.326895	-5.92511
ENSG00000104154	SLC30A4	0.604079	0.682488	3.20752	0.00150701	0.00696481	-1.60466
ENSG00000104164	BLOC1S6	-0.120096	3.4399	-0.540713	0.589169	0.70572	-6.69212
ENSG00000104177	MYEF2	-0.0272212	0.480991	-0.110733	0.911914	0.944835	-6.57345
ENSG00000104205	SGK3	0.279874	2.23441	1.82098	0.0697623	0.142684	-5.15483
ENSG00000104219	ZDHHC2	0.256246	0.647968	1.24717	0.213462	0.337941	-5.84177
ENSG00000104228	TRIM35	-0.392094	-0.559464	-2.05304	0.0410713	0.0953777	-4.395
ENSG00000104267	CA2	-0.413958	-0.207682	-1.82422	0.0692687	0.14194	-4.86434
ENSG00000104299	INTS9	-0.226113	0.288784	-1.35912	0.175289	0.292098	-5.66544
ENSG00000104312	RIPK2	0.549001	3.1986	3.11943	0.00201654	0.0088265	-2.08365
ENSG00000104320	NBN	1.65348	4.53673	8.66536	4.93293e-16	1.47151e-13	25.8395
ENSG00000104324	CPQ	-0.187367	2.57432	-1.28563	0.19972	0.321775	-6.00023
ENSG00000104325	DECR1	0.208208	2.97192	1.43436	0.152675	0.262842	-5.80655
ENSG00000104331	IMPAD1	-0.309939	0.447642	-1.7799	0.0762633	0.152713	-5.06169
ENSG00000104343	UBE2W	0.362441	1.9548	2.67542	0.00793833	0.0263647	-3.26376
ENSG00000104365	IKBKB	0.248603	2.77356	2.2485	0.0253841	0.0656891	-4.33125
ENSG00000104375	STK3	0.186038	1.86572	1.18692	0.236347	0.363474	-6.06348
ENSG00000104388	RAB2A	0.111751	2.84322	0.897167	0.370462	0.50538	-6.42172
ENSG00000104408	EIF3E	-0.199952	2.41622	-1.28295	0.200656	0.322648	-5.99805
ENSG00000104412	EMC2	0.33284	1.86284	1.93484	0.0540965	0.118179	-4.91516
ENSG00000104419	NDRG1	-0.130537	4.44095	-0.866101	0.387235	0.522399	-6.46958
ENSG00000104432	IL7	0.345294	-0.0305191	1.38893	0.166047	0.280131	-5.51401
ENSG00000104447	TRPS1	0.161338	1.67066	1.18417	0.23743	0.364627	-6.05118
ENSG00000104450	SPAG1	-0.230454	0.0604942	-1.1476	0.252192	0.381231	-5.8895
ENSG00000104472	CHRAC1	0.162989	0.347339	1.00022	0.318137	0.452886	-6.05573
ENSG00000104490	NCALD	-0.819571	-0.153753	-3.08662	0.00224392	0.00963329	-1.93797
ENSG00000104497	SNX16	0.408444	0.103059	2.4099	0.0166535	0.0474906	-3.67116
ENSG00000104517	UBR5	-0.017716	2.042	-0.164817	0.869216	0.916194	-6.76962
ENSG00000104518	GSDMD	0.472514	2.82814	3.60171	0.000378781	0.00227917	-0.534665
ENSG00000104522	TSTA3	-0.213218	0.93578	-1.37811	0.169355	0.284348	-5.74638
ENSG00000104529	EEF1D	-0.128398	4.89507	-1.28489	0.199978	0.321954	-6.0226
ENSG00000104549	SQLE	-0.321941	0.274998	-1.83578	0.0675353	0.139404	-4.91186
ENSG00000104611	SH2D4A	-0.424466	-0.121907	-2.05455	0.0409244	0.0951264	-4.45164
ENSG00000104613	INTS10	-0.144046	1.60806	-0.990312	0.322944	0.457387	-6.26869
ENSG00000104626	ERI1	0.301948	1.87841	1.6601	0.0981029	0.185931	-5.39538
ENSG00000104660	LEPROTL1	0.119552	1.66652	0.767157	0.443686	0.57712	-6.45502
ENSG00000104671	DCTN6	-0.239657	0.630346	-1.52464	0.128567	0.230573	-5.48832
ENSG00000104687	GSR	-0.123788	1.84313	-0.950781	0.342601	0.477362	-6.32939
ENSG00000104689	TNFRSF10A	0.136142	0.833763	0.848361	0.397019	0.531736	-6.27822
ENSG00000104695	PPP2CB	-0.238954	1.95245	-1.85352	0.0649435	0.135217	-5.0972
ENSG00000104714	ERICH1	0.000109388	2.78688	0.000680791	0.999457	0.999762	-6.82021
ENSG00000104731	KLHDC4	-0.489657	0.622128	-2.471	0.0141169	0.0414949	-3.67594
ENSG00000104738	MCM4	-0.224321	0.637418	-0.967606	0.334143	0.468321	-6.16979
ENSG00000104756	KCTD9	-0.0395849	0.800262	-0.226736	0.820807	0.88119	-6.62203
ENSG00000104763	ASAH1	0.183764	5.13449	1.31611	0.189299	0.309134	-5.982
ENSG00000104765	BNIP3L	0.333677	2.30512	2.24756	0.0254449	0.0657599	-4.30962
ENSG00000104774	MAN2B1	-0.341401	3.26968	-2.68553	0.00770865	0.0258197	-3.30661
ENSG00000104783	KCNN4	0.168655	1.41698	0.946423	0.344814	0.479518	-6.26958
ENSG00000104804	TULP2	0.906439	1.40717	2.35653	0.0191905	0.0528562	-3.93711
ENSG00000104805	NUCB1	0.0374239	4.26772	0.270507	0.786985	0.855653	-6.80525
ENSG00000104812	GYS1	0.0112518	1.34764	0.0768028	0.93884	0.962024	-6.72225
ENSG00000104814	MAP4K1	-0.268984	0.307153	-1.06974	0.285732	0.418191	-6.01061
ENSG00000104823	ECH1	-0.669156	2.02367	-4.17957	3.99585e-05	0.00035501	1.57605
ENSG00000104824	HNRNPL	-0.132423	3.27789	-1.33695	0.182411	0.300982	-5.9505
ENSG00000104825	NFKBIB	0.274577	1.69054	2.11186	0.0356543	0.0858355	-4.55415
ENSG00000104852	SNRNP70	-0.165499	2.58879	-1.17513	0.24102	0.368874	-6.13331
ENSG00000104853	CLPTM1	-0.293583	2.00809	-2.96298	0.00332968	0.0131659	-2.51051
ENSG00000104856	RELB	0.444765	3.17785	3.28512	0.00115984	0.00562439	-1.57964
ENSG00000104859	CLASRP	0.167282	2.52671	1.39453	0.164352	0.277969	-5.84472
ENSG00000104866	PPP1R37	-0.406969	0.103185	-2.16573	0.0312432	0.0775683	-4.2696
ENSG00000104870	FCGRT	-0.454718	3.59175	-3.4873	0.000572922	0.00318635	-0.943008
ENSG00000104872	PIH1D1	-0.0843238	0.828064	-0.455681	0.649	0.753452	-6.55483
ENSG00000104880	ARHGEF18	-0.0642913	0.622965	-0.455862	0.64887	0.753418	-6.51535
ENSG00000104885	DOT1L	-0.121378	2.8615	-0.795656	0.426959	0.561147	-6.51135
ENSG00000104886	PLEKHJ1	0.00549183	1.34691	0.0404599	0.967758	0.980305	-6.72243
ENSG00000104894	CD37	0.53517	4.868	4.00652	8.05531e-05	0.000629837	0.886201
ENSG00000104897	SF3A2	-0.164918	1.23482	-1.20508	0.229271	0.355648	-6.00063
ENSG00000104903	LYL1	0.0728319	1.07303	0.474479	0.635557	0.742779	-6.55783
ENSG00000104904	OAZ1	-0.158913	6.47555	-1.75473	0.0804863	0.159066	-5.30093
ENSG00000104907	TRMT1	-0.4747	0.122283	-2.38669	0.017718	0.0496486	-3.7989
ENSG00000104915	STX10	0.156718	2.00654	1.10478	0.27028	0.400818	-6.16648
ENSG00000104918	RETN	-0.35956	2.37989	-1.12968	0.259655	0.389582	-6.17129
ENSG00000104936	DMPK	-0.91964	-0.411389	-4.31538	2.26787e-05	0.000219301	2.32539
ENSG00000104946	TBC1D17	0.664613	1.54021	4.4716	1.16172e-05	0.000127919	2.82561
ENSG00000104951	IL4I1	1.56976	2.27981	6.28595	1.37208e-09	5.44627e-08	11.4594
ENSG00000104957	CCDC130	-0.185344	1.10386	-1.48272	0.139362	0.245549	-5.61456
ENSG00000104960	PTOV1	-0.644048	1.9257	-5.14935	5.17326e-07	9.50105e-06	5.7138
ENSG00000104964	TLE5	-0.637831	3.17717	-3.52074	0.00050821	0.00289013	-0.82855
ENSG00000104969	SGTA	-0.134356	1.60375	-1.1663	0.244562	0.372343	-6.07882
ENSG00000104972	LILRB1	0.769069	3.45202	3.78968	0.000187601	0.00125033	0.109248
ENSG00000104973	MED25	-0.102358	2.2461	-0.882582	0.378279	0.513412	-6.41232
ENSG00000104974	LILRA1	0.815181	1.33866	3.88184	0.000131571	0.000944016	0.587508
ENSG00000104976	SNAPC2	-0.370031	-0.103238	-1.95685	0.0514375	0.113532	-4.64165
ENSG00000104979	C19orf53	-0.250131	1.55302	-1.65201	0.0997425	0.188493	-5.41119
ENSG00000104980	TIMM44	-0.610243	0.458461	-3.51496	0.000518873	0.00293719	-0.678572
ENSG00000104983	CCDC61	-0.979047	-0.624975	-4.47836	1.12815e-05	0.00012478	3.00389
ENSG00000104998	IL27RA	0.204723	-0.190571	1.45457	0.146999	0.255889	-5.38813
ENSG00000105053	VRK3	0.122122	2.25873	1.27521	0.203377	0.326172	-5.98983
ENSG00000105058	FAM32A	0.115141	1.80493	0.940905	0.347629	0.482116	-6.32161
ENSG00000105063	PPP6R1	-0.0811504	2.56357	-0.765504	0.444668	0.578052	-6.5241
ENSG00000105085	MED26	-0.270516	-0.10401	-1.61197	0.108184	0.200936	-5.21758
ENSG00000105122	RASAL3	0.391665	1.61948	2.21508	0.0276237	0.070193	-4.32003
ENSG00000105127	AKAP8	-0.164071	0.477384	-1.22698	0.220942	0.34644	-5.86543
ENSG00000105135	ILVBL	-0.554055	-0.144793	-2.89992	0.00405242	0.0154023	-2.45597
ENSG00000105171	POP4	0.209246	1.00863	1.21638	0.224944	0.351205	-5.93178
ENSG00000105176	URI1	-0.0652751	0.665619	-0.379503	0.704625	0.795907	-6.5637
ENSG00000105185	PDCD5	-0.439621	0.714645	-2.11466	0.0354133	0.0853418	-4.47469
ENSG00000105186	ANKRD27	-0.0949014	0.484208	-0.688968	0.491459	0.620168	-6.35894
ENSG00000105193	RPS16	-0.277888	5.14311	-1.88797	0.0601464	0.127686	-5.08044
ENSG00000105197	TIMM50	-0.822354	1.14153	-5.37833	1.67852e-07	3.7468e-06	6.82514
ENSG00000105202	FBL	-0.429346	1.33441	-2.51844	0.0123899	0.0374823	-3.63775
ENSG00000105220	GPI	-0.553271	2.81813	-3.87961	0.000132716	0.00094808	0.42769
ENSG00000105221	AKT2	0.111508	2.84784	1.0484	0.295429	0.429002	-6.27605
ENSG00000105223	PLD3	-0.759461	2.78122	-4.75056	3.3617e-06	4.58346e-05	3.90147
ENSG00000105229	PIAS4	0.0461559	1.19981	0.283586	0.776954	0.848401	-6.65585
ENSG00000105245	NUMBL	-0.841242	-0.319464	-4.35983	1.87837e-05	0.00018868	2.50112
ENSG00000105246	EBI3	1.32937	0.14666	4.16414	4.25757e-05	0.00037488	1.79748
ENSG00000105248	YJU2	0.350714	-0.23178	2.04474	0.0418902	0.0966862	-4.37047
ENSG00000105254	TBCB	-0.245229	2.05373	-2.03575	0.0427913	0.0983741	-4.75501
ENSG00000105258	POLR2I	-0.826585	0.489136	-3.17724	0.00166691	0.0075618	-1.76046
ENSG00000105281	SLC1A5	-0.461648	0.713854	-2.87682	0.00435109	0.0162984	-2.63347
ENSG00000105287	PRKD2	0.561883	3.08995	3.65212	0.000314596	0.00194895	-0.368706
ENSG00000105289	TJP3	-0.78269	0.0183759	-3.24858	0.00131284	0.00622823	-1.4812
ENSG00000105290	APLP1	-0.376924	-0.0425716	-1.27389	0.203841	0.326437	-5.73574
ENSG00000105321	CCDC9	0.344579	2.19463	2.47801	0.013849	0.0408907	-3.77186
ENSG00000105323	HNRNPUL1	-0.396396	2.81593	-3.34269	0.000952026	0.00479864	-1.40096
ENSG00000105325	FZR1	-0.026578	1.65731	-0.205321	0.837483	0.892614	-6.73557
ENSG00000105327	BBC3	0.131324	1.18866	0.659075	0.510433	0.638057	-6.48219
ENSG00000105329	TGFB1	0.260507	3.90568	2.22555	0.0269041	0.0687906	-4.40433
ENSG00000105339	DENND3	0.330522	5.27184	2.00407	0.0461023	0.104666	-4.86049
ENSG00000105341	DMAC2	-0.202664	0.404934	-1.49174	0.136982	0.242049	-5.50106
ENSG00000105352	CEACAM4	0.42987	1.46454	1.91432	0.0566795	0.122064	-4.89742
ENSG00000105355	PLIN3	-0.0035383	3.02235	-0.0364076	0.970985	0.981958	-6.82593
ENSG00000105357	MYH14	-1.05325	0.63407	-3.98398	8.81048e-05	0.000676524	0.925147
ENSG00000105364	MRPL4	-0.691142	-0.117551	-3.8747	0.00013527	0.000964227	0.639825
ENSG00000105372	RPS19	-0.297606	4.93682	-1.72371	0.0859524	0.16768	-5.37216
ENSG00000105373	NOP53	-0.558911	2.46962	-3.876	0.000134588	0.000960755	0.421763
ENSG00000105374	NKG7	1.50016	2.70737	5.34305	2.00117e-07	4.31061e-06	6.64349
ENSG00000105379	ETFB	-0.464461	1.20262	-3.0602	0.00244396	0.0103078	-2.17454
ENSG00000105383	CD33	-0.593494	-0.00456142	-3.37574	0.00084898	0.00436643	-1.06124
ENSG00000105388	CEACAM5	-0.0825657	1.16298	-0.239616	0.810817	0.873652	-6.66218
ENSG00000105393	BABAM1	-0.162045	1.21106	-1.00556	0.315566	0.450077	-6.21907
ENSG00000105397	TYK2	-0.0954287	3.64032	-0.740545	0.459639	0.591305	-6.56713
ENSG00000105401	CDC37	-0.260479	3.32409	-2.09947	0.0367422	0.0876982	-4.66722
ENSG00000105402	NAPA	0.9265	4.51471	7.19744	6.60769e-12	5.24566e-10	16.5749
ENSG00000105404	RABAC1	-0.128875	2.50075	-0.88327	0.377908	0.51298	-6.42546
ENSG00000105438	KDELR1	-0.620253	1.7794	-4.48088	1.11583e-05	0.000123954	2.79879
ENSG00000105443	CYTH2	-0.588913	1.58933	-4.54361	8.48189e-06	9.86516e-05	3.07096
ENSG00000105483	CARD8	0.341996	3.47642	2.72026	0.00696399	0.0238696	-3.21297
ENSG00000105486	LIG1	-0.310772	0.0199389	-1.36978	0.171939	0.287705	-5.60028
ENSG00000105499	PLA2G4C	0.274672	1.26836	1.22006	0.22355	0.34975	-5.95379
ENSG00000105501	SIGLEC5	1.07346	2.36464	4.36053	1.87278e-05	0.000188311	2.32842
ENSG00000105514	RAB3D	0.124159	1.93736	0.699437	0.484906	0.613944	-6.52183
ENSG00000105518	TMEM205	-0.0471197	0.611975	-0.290822	0.77142	0.844231	-6.58286
ENSG00000105519	CAPS	-1.52691	1.1451	-4.68826	4.45672e-06	5.83404e-05	3.67679
ENSG00000105520	PLPPR2	0.188104	1.85567	1.11948	0.26397	0.394074	-6.13636
ENSG00000105523	FAM83E	-0.730767	-0.47258	-2.94428	0.00353058	0.0137426	-2.28014
ENSG00000105556	MIER2	-0.59987	0.0376912	-3.33533	0.000976521	0.00488956	-1.19405
ENSG00000105559	PLEKHA4	-0.212698	0.0755409	-0.971856	0.332027	0.466459	-6.07729
ENSG00000105568	PPP2R1A	-0.392686	2.40193	-3.07559	0.00232551	0.00992299	-2.20694
ENSG00000105576	TNPO2	-0.175355	1.17911	-1.27422	0.203724	0.326357	-5.90528
ENSG00000105583	WDR83OS	0.148547	1.60123	0.66974	0.50362	0.631673	-6.51323
ENSG00000105607	GCDH	-0.480261	-0.159695	-2.45689	0.0146702	0.0428398	-3.58568
ENSG00000105609	LILRB5	-0.0832746	-0.110039	-0.629632	0.529489	0.654564	-6.27304
ENSG00000105612	DNASE2	0.0753051	1.22221	0.429961	0.667581	0.767808	-6.60736
ENSG00000105618	PRPF31	-0.601877	0.205607	-4.10619	5.3945e-05	0.000459373	1.45505
ENSG00000105619	TFPT	-0.347213	-0.0587104	-1.94607	0.052726	0.115856	-4.66458
ENSG00000105639	JAK3	0.848198	3.72399	5.27128	2.8538e-07	5.80431e-06	6.25973
ENSG00000105640	RPL18A	-0.616842	4.50715	-3.55002	0.000457244	0.00266984	-0.734075
ENSG00000105643	ARRDC2	0.0778903	2.3484	0.512705	0.608594	0.722243	-6.67076
ENSG00000105647	PIK3R2	-0.559816	-0.0252621	-2.44439	0.015176	0.0440103	-3.62699
ENSG00000105655	ISYNA1	-0.213922	0.0979419	-1.11269	0.266873	0.397203	-5.92784
ENSG00000105656	ELL	-0.00587814	2.77801	-0.0405293	0.967702	0.980305	-6.81947
ENSG00000105669	COPE	0.0656059	3.32024	0.601239	0.548206	0.671964	-6.65411
ENSG00000105671	DDX49	0.148029	0.925826	0.920504	0.358165	0.49277	-6.23669
ENSG00000105676	ARMC6	-0.0606327	-0.0393725	-0.356539	0.721727	0.807258	-6.41283
ENSG00000105677	TMEM147	-0.580707	0.495609	-3.37554	0.000849545	0.00436706	-1.13107
ENSG00000105697	HAMP	1.9524	1.23296	4.91902	1.54625e-06	2.39328e-05	4.85867
ENSG00000105698	USF2	0.114623	3.702	0.937389	0.349431	0.483933	-6.40289
ENSG00000105699	LSR	-0.268496	0.525897	-1.22975	0.219906	0.345256	-5.86938
ENSG00000105700	KXD1	-0.341677	2.10104	-2.95082	0.00345919	0.0135289	-2.55307
ENSG00000105701	FKBP8	-0.211627	3.51005	-1.87269	0.0622366	0.13077	-5.10971
ENSG00000105705	SUGP1	0.0836157	0.780501	0.535408	0.592827	0.708656	-6.48902
ENSG00000105707	HPN	0.636244	0.545564	2.31775	0.0212415	0.0571629	-3.92951
ENSG00000105711	SCN1B	0.614635	1.62574	2.49625	0.0131728	0.0393588	-3.66235
ENSG00000105722	ERF	-0.598613	1.90533	-3.52458	0.000501222	0.00285538	-0.781281
ENSG00000105723	GSK3A	-0.148688	1.78512	-1.32723	0.185598	0.304758	-5.89844
ENSG00000105726	ATP13A1	0.271055	1.62647	1.748	0.0816466	0.160907	-5.22825
ENSG00000105738	SIPA1L3	-0.289465	1.09407	-1.41262	0.158965	0.271346	-5.72769
ENSG00000105755	ETHE1	-0.681428	0.403923	-3.67865	0.000285073	0.00178889	-0.130754
ENSG00000105771	SMG9	-0.117443	2.0342	-0.747051	0.455709	0.587557	-6.51018
ENSG00000105778	AVL9	0.253226	1.94643	2.20921	0.0280341	0.070961	-4.36892
ENSG00000105792	CFAP69	-0.423993	0.211856	-2.17374	0.030629	0.0762549	-4.26992
ENSG00000105808	RASA4	-0.402161	1.06785	-1.9912	0.0475079	0.106871	-4.7707
ENSG00000105810	CDK6	-0.162205	-0.274612	-0.974442	0.330745	0.465263	-5.975
ENSG00000105819	PMPCB	0.114308	0.606562	0.973631	0.331147	0.465754	-6.12372
ENSG00000105821	DNAJC2	0.196053	0.374331	1.42311	0.155906	0.267515	-5.56394
ENSG00000105835	NAMPT	0.642228	8.86677	3.85174	0.00014784	0.00103435	0.360461
ENSG00000105851	PIK3CG	0.20315	1.54619	1.34741	0.179025	0.296837	-5.8301
ENSG00000105854	PON2	-0.770732	-0.434234	-3.91096	0.000117451	0.000858344	0.804
ENSG00000105855	ITGB8	-0.790478	1.47861	-4.4611	1.21589e-05	0.000132256	2.72865
ENSG00000105856	HBP1	0.572636	3.32511	4.88565	1.80635e-06	2.7065e-05	4.49661
ENSG00000105866	SP4	0.343495	-0.395033	1.48343	0.139173	0.245348	-5.30939
ENSG00000105875	WDR91	0.0592651	1.04761	0.311179	0.755914	0.833553	-6.63018
ENSG00000105877	DNAH11	-0.612142	1.44612	-2.38811	0.0176513	0.04949	-3.97139
ENSG00000105879	CBLL1	0.466152	0.598988	2.90335	0.00400966	0.0152634	-2.48665
ENSG00000105887	MTPN	0.0475079	3.31323	0.410085	0.682082	0.779188	-6.74993
ENSG00000105928	GSDME	0.170342	-0.323711	0.756763	0.449879	0.582536	-6.12148
ENSG00000105939	ZC3HAV1	1.53737	2.758	6.98931	2.32951e-11	1.50867e-09	15.3835
ENSG00000105953	OGDH	-0.186816	2.47114	-1.87291	0.0622058	0.13077	-5.08338
ENSG00000105963	ADAP1	-0.165202	2.80197	-1.01487	0.311115	0.445537	-6.3149
ENSG00000105967	TFEC	1.59674	2.52551	6.222	1.95871e-09	7.50253e-08	11.1065
ENSG00000105968	H2AZ2	-0.346394	1.94399	-2.59208	0.0100807	0.0318524	-3.50203
ENSG00000105976	MET	-0.17667	0.236007	-0.833182	0.405509	0.54016	-6.21721
ENSG00000105983	LMBR1	-0.164448	1.75627	-1.23683	0.21727	0.342319	-6.01492
ENSG00000105993	DNAJB6	0.322573	3.82825	3.50538	0.00053702	0.00301393	-0.88165
ENSG00000106003	LFNG	-0.475188	1.96977	-3.39965	0.000780993	0.00408724	-1.18777
ENSG00000106009	BRAT1	-0.325946	0.297316	-2.53721	0.0117604	0.0359643	-3.44674
ENSG00000106012	IQCE	-0.226533	1.18379	-1.62799	0.10474	0.196206	-5.40778
ENSG00000106028	SSBP1	-0.196296	1.41659	-1.31122	0.190944	0.310995	-5.88768
ENSG00000106052	TAX1BP1	0.137562	2.67067	1.19043	0.234964	0.362033	-6.11277
ENSG00000106066	CPVL	-0.125164	1.56339	-0.74862	0.454765	0.586801	-6.46886
ENSG00000106069	CHN2	-0.474767	-0.10103	-2.13015	0.0341004	0.0829464	-4.29846
ENSG00000106070	GRB10	0.167089	1.70864	0.772588	0.440469	0.57415	-6.4478
ENSG00000106077	ABHD11	-0.840694	0.0774802	-4.40506	1.5482e-05	0.000163175	2.62617
ENSG00000106089	STX1A	-0.898945	0.369018	-4.20227	3.63853e-05	0.000331032	1.79203
ENSG00000106100	NOD1	0.303604	-0.374738	1.40571	0.161006	0.27426	-5.39315
ENSG00000106105	GARS1	0.0237966	2.338	0.166156	0.868164	0.915795	-6.78808
ENSG00000106144	CASP2	0.00317561	0.130075	0.0216385	0.982753	0.989083	-6.49992
ENSG00000106153	CHCHD2	-0.00837748	3.34826	-0.0604518	0.951842	0.970174	-6.83263
ENSG00000106211	HSPB1	-0.976348	3.69353	-3.70288	0.000260417	0.0016533	-0.211381
ENSG00000106244	PDAP1	0.0252904	2.93681	0.171137	0.86425	0.912967	-6.81072
ENSG00000106245	BUD31	0.467766	2.60006	3.384	0.000824878	0.00428089	-1.24628
ENSG00000106258	CYP3A5	-0.62626	-0.190401	-3.01804	0.00279745	0.0114538	-2.12506
ENSG00000106261	ZKSCAN1	0.0059255	1.65011	0.0513648	0.959074	0.975323	-6.74952
ENSG00000106263	EIF3B	-0.452106	1.47478	-3.68419	0.000279248	0.00176042	-0.204622
ENSG00000106266	SNX8	0.110534	2.47961	0.641734	0.521613	0.647674	-6.60149
ENSG00000106268	NUDT1	-0.380859	0.622132	-1.24171	0.215466	0.340403	-5.88007
ENSG00000106290	TAF6	-0.360352	0.476631	-1.96611	0.0503518	0.111759	-4.72116
ENSG00000106330	MOSPD3	-0.343532	-0.347697	-2.02035	0.0443748	0.101305	-4.47014
ENSG00000106344	RBM28	-0.41992	0.40022	-2.59314	0.0100505	0.0317899	-3.32922
ENSG00000106346	USP42	0.433354	0.200668	2.81694	0.00522119	0.0189031	-2.6551
ENSG00000106348	IMPDH1	-0.0789386	3.20559	-0.597497	0.550697	0.674177	-6.65604
ENSG00000106367	AP1S1	-0.131106	0.0116955	-0.763068	0.446116	0.578981	-6.23372
ENSG00000106392	C1GALT1	0.871569	1.96381	5.19623	4.12068e-07	7.86051e-06	5.97601
ENSG00000106397	PLOD3	-0.775307	1.73585	-5.31095	2.34644e-07	4.94612e-06	6.47706
ENSG00000106399	RPA3	0.0299893	-0.176952	0.137886	0.890437	0.929564	-6.45335
ENSG00000106400	ZNHIT1	-0.0327205	1.90472	-0.271711	0.78606	0.855214	-6.73875
ENSG00000106415	GLCCI1	-0.0325671	-0.0714391	-0.167802	0.86687	0.914823	-6.47545
ENSG00000106459	NRF1	0.0225185	0.0318511	0.150265	0.880673	0.922958	-6.48322
ENSG00000106460	TMEM106B	-0.0103192	0.555723	-0.0657231	0.947649	0.967297	-6.59626
ENSG00000106462	EZH2	0.959002	0.289756	4.38586	1.68091e-05	0.000172723	2.62405
ENSG00000106541	AGR2	-0.37336	1.85959	-1.09621	0.274004	0.405121	-6.18724
ENSG00000106546	AHR	0.150543	2.13744	0.982881	0.326582	0.46088	-6.29985
ENSG00000106554	CHCHD3	-0.0880664	0.398664	-0.528158	0.597841	0.712143	-6.44305
ENSG00000106560	GIMAP2	1.1879	1.15787	4.65364	5.20612e-06	6.60426e-05	3.65308
ENSG00000106565	TMEM176B	1.77693	1.88873	6.1537	2.85666e-09	1.04234e-07	10.7815
ENSG00000106588	PSMA2	0.460471	1.51449	2.48919	0.013431	0.0399651	-3.67278
ENSG00000106591	MRPL32	0.0881611	-0.198469	0.43121	0.666674	0.767034	-6.35305
ENSG00000106603	COA1	-0.162633	1.32545	-1.45643	0.146484	0.255265	-5.68134
ENSG00000106605	BLVRA	-0.0247135	1.80353	-0.137879	0.890443	0.929564	-6.75715
ENSG00000106608	URGCP	-0.309622	-0.195825	-1.76178	0.0792839	0.157258	-4.9743
ENSG00000106609	TMEM248	0.0948531	2.10812	0.842786	0.400125	0.534731	-6.43198
ENSG00000106615	RHEB	0.128263	2.35033	1.08651	0.27826	0.409507	-6.2153
ENSG00000106617	PRKAG2	0.304805	2.26998	2.47925	0.0138019	0.0407823	-3.77421
ENSG00000106628	POLD2	-0.729969	0.144097	-3.82994	0.000160796	0.0011069	0.437865
ENSG00000106635	BCL7B	0.00157427	1.62076	0.0139524	0.988879	0.992508	-6.74926
ENSG00000106636	YKT6	0.148509	1.65298	1.2834	0.200498	0.3225	-5.92829
ENSG00000106638	TBL2	-0.170452	1.32176	-1.23701	0.217202	0.342266	-5.97301
ENSG00000106665	CLIP2	-0.39529	0.43617	-2.6919	0.00756687	0.0254661	-3.08155
ENSG00000106682	EIF4H	-0.0948905	3.08576	-0.906651	0.365433	0.500254	-6.42319
ENSG00000106683	LIMK1	-0.173468	1.40054	-1.43095	0.153649	0.264334	-5.7272
ENSG00000106714	CNTNAP3	-0.352877	0.723971	-1.34753	0.178986	0.296823	-5.75526
ENSG00000106723	SPIN1	-0.191028	0.359086	-1.12769	0.260492	0.39048	-5.94658
ENSG00000106733	NMRK1	0.376979	0.845434	2.3268	0.0207466	0.0561378	-3.97541
ENSG00000106780	MEGF9	0.0885802	1.86648	0.512556	0.608698	0.722243	-6.63332
ENSG00000106785	TRIM14	0.326117	1.52509	1.68052	0.0940596	0.18	-5.32556
ENSG00000106799	TGFBR1	0.251708	2.10424	1.43616	0.152161	0.262463	-5.75946
ENSG00000106803	SEC61B	-0.184112	2.47171	-1.15423	0.249469	0.378218	-6.15322
ENSG00000106829	TLE4	0.579099	3.57565	5.26118	2.9992e-07	5.98866e-06	6.21077
ENSG00000106853	PTGR1	-0.405243	0.457654	-2.42556	0.0159677	0.0458669	-3.75836
ENSG00000106868	SUSD1	0.0115976	1.09618	0.0855803	0.931866	0.957725	-6.68003
ENSG00000106948	AKNA	0.314175	3.4717	2.32081	0.0210727	0.0568482	-4.18784
ENSG00000106952	TNFSF8	-0.271556	0.826857	-1.08003	0.281131	0.412583	-6.07433
ENSG00000106976	DNM1	-0.756178	-0.381135	-2.3953	0.0173162	0.0488287	-3.71094
ENSG00000106991	ENG	-0.331538	2.30109	-1.82639	0.0689416	0.141417	-5.16093
ENSG00000106992	AK1	-0.600442	-0.739508	-2.51838	0.0123919	0.0374823	-3.33519
ENSG00000107020	PLGRKT	0.508164	0.646135	2.74591	0.00645653	0.0224905	-2.91509
ENSG00000107036	RIC1	0.594409	0.455571	3.97532	9.11792e-05	0.000693638	1.01779
ENSG00000107077	KDM4C	0.169946	1.28803	1.2764	0.202957	0.325658	-5.90091
ENSG00000107099	DOCK8	0.373894	3.96375	3.05833	0.00245877	0.0103437	-2.27945
ENSG00000107104	KANK1	-0.20286	-0.232257	-1.0387	0.299912	0.433912	-5.91825
ENSG00000107140	TESK1	-0.0939151	0.776582	-0.629684	0.529455	0.654564	-6.44666
ENSG00000107164	FUBP3	-0.299722	0.652008	-1.90242	0.0582232	0.124524	-4.86257
ENSG00000107175	CREB3	-0.162967	0.34424	-1.17364	0.241618	0.369158	-5.88847
ENSG00000107201	DDX58	2.74792	2.35643	8.10623	2.07412e-14	3.35152e-12	22.199
ENSG00000107223	EDF1	-0.417378	2.79457	-2.37653	0.0182026	0.0507661	-4.0546
ENSG00000107242	PIP5K1B	-0.268208	-0.181448	-1.63014	0.104285	0.195467	-5.18338
ENSG00000107249	GLIS3	-1.37245	-0.430892	-6.81253	6.66597e-11	3.79669e-09	14.4151
ENSG00000107262	BAG1	0.270939	2.71077	1.70658	0.0890962	0.172582	-5.37449
ENSG00000107263	RAPGEF1	-0.18417	3.75441	-1.39045	0.165583	0.279588	-5.88413
ENSG00000107281	NPDC1	-0.258718	-0.555304	-1.06646	0.287206	0.419661	-5.84536
ENSG00000107290	SETX	0.640519	2.3787	4.36441	1.84212e-05	0.000185988	2.32719
ENSG00000107331	ABCA2	0.080368	1.88022	0.479316	0.632118	0.740694	-6.64774
ENSG00000107341	UBE2R2	0.0801398	2.10784	0.657975	0.511138	0.638695	-6.57112
ENSG00000107371	EXOSC3	-0.146667	0.681222	-0.865429	0.387603	0.522824	-6.26551
ENSG00000107372	ZFAND5	-0.00906224	3.67558	-0.0674353	0.946287	0.966914	-6.83623
ENSG00000107404	DVL1	-0.599895	0.552649	-3.60893	0.000368881	0.00223355	-0.374089
ENSG00000107438	PDLIM1	-1.5079	0.905514	-6.37946	8.11641e-10	3.39991e-08	11.9565
ENSG00000107521	HPS1	0.32612	2.75834	2.96824	0.00327515	0.012995	-2.51699
ENSG00000107551	RASSF4	0.509398	1.72659	2.87331	0.00439819	0.0164373	-2.70718
ENSG00000107566	ERLIN1	0.152695	0.942527	0.758353	0.448928	0.581633	-6.36463
ENSG00000107581	EIF3A	-0.060387	2.2319	-0.504341	0.61445	0.726651	-6.66938
ENSG00000107614	TRDMT1	-0.0806962	0.33569	-0.405036	0.685785	0.781803	-6.49252
ENSG00000107625	DDX50	0.0969943	0.325235	0.683635	0.494816	0.623444	-6.31915
ENSG00000107643	MAPK8	-0.132534	0.83723	-0.876594	0.381518	0.516811	-6.27558
ENSG00000107651	SEC23IP	0.0168487	1.14988	0.109713	0.912722	0.944976	-6.68511
ENSG00000107669	ATE1	-0.0885497	-0.0465046	-0.40446	0.686208	0.781997	-6.4331
ENSG00000107736	CDH23	0.288285	0.975448	1.88325	0.0607852	0.128737	-4.91081
ENSG00000107738	VSIR	0.372092	4.34334	2.37699	0.0181805	0.0507281	-4.06737
ENSG00000107742	SPOCK2	0.578628	0.20747	2.24533	0.0255896	0.0660472	-4.03163
ENSG00000107745	MICU1	0.565807	1.94398	4.68664	4.48923e-06	5.861e-05	3.68676
ENSG00000107758	PPP3CB	0.220592	0.788156	1.5584	0.120358	0.218235	-5.42256
ENSG00000107771	CCSER2	0.272462	1.12623	2.05	0.0413703	0.0958511	-4.62
ENSG00000107796	ACTA2	0.0238694	0.16644	0.104274	0.917032	0.947545	-6.49888
ENSG00000107798	LIPA	0.637157	3.12558	2.33208	0.0204622	0.0555517	-4.14712
ENSG00000107819	SFXN3	-0.33134	1.42943	-2.3474	0.0196572	0.0537515	-4.03954
ENSG00000107829	FBXW4	-0.0388922	0.790778	-0.247353	0.80483	0.869676	-6.61288
ENSG00000107854	TNKS2	0.818206	1.23519	5.23276	3.44777e-07	6.74748e-06	6.1988
ENSG00000107862	GBF1	0.0117994	0.667948	0.0949133	0.924457	0.952835	-6.61056
ENSG00000107863	ARHGAP21	-0.102566	1.31291	-0.644133	0.520058	0.646395	-6.51586
ENSG00000107874	CUEDC2	0.0881153	0.463464	0.592023	0.554351	0.677556	-6.4042
ENSG00000107897	ACBD5	0.330392	0.127111	2.28116	0.0233499	0.0617396	-3.95279
ENSG00000107902	LHPP	-0.887102	-0.220976	-4.70767	4.08315e-06	5.39524e-05	3.91258
ENSG00000107929	LARP4B	0.416237	2.78845	3.6786	0.000285124	0.00178889	-0.27051
ENSG00000107937	GTPBP4	-0.00154849	0.339703	-0.00897441	0.992846	0.99507	-6.5699
ENSG00000107938	EDRF1	0.0119209	-0.0249562	0.0776509	0.938166	0.96151	-6.47344
ENSG00000107949	BCCIP	-0.27481	-0.03354	-1.72326	0.086033	0.167804	-5.06021
ENSG00000107959	PITRM1	-0.284922	0.762391	-1.93295	0.0543302	0.118403	-4.82664
ENSG00000107968	MAP3K8	0.295601	3.59759	2.08573	0.0379806	0.0897674	-4.69485
ENSG00000108010	GLRX3	-0.225757	2.03777	-1.45395	0.147168	0.256003	-5.75034
ENSG00000108021	TASOR2	0.254913	1.17925	1.6052	0.109667	0.203117	-5.4146
ENSG00000108039	XPNPEP1	-0.408129	1.66028	-2.8675	0.00447717	0.0166889	-2.75774
ENSG00000108061	SHOC2	0.463238	3.03999	3.63622	0.000333637	0.00203995	-0.424125
ENSG00000108064	TFAM	0.113387	0.189879	0.654647	0.513275	0.64072	-6.31332
ENSG00000108094	CUL2	0.591027	0.309288	3.34552	0.000942755	0.00475922	-1.13107
ENSG00000108100	CCNY	-0.00961404	1.65944	-0.0662398	0.947238	0.967297	-6.75
ENSG00000108106	UBE2S	0.359342	1.8182	1.74196	0.0827013	0.162174	-5.2597
ENSG00000108107	RPL28	-0.00136034	5.53747	-0.00873042	0.993041	0.995147	-6.83481
ENSG00000108175	ZMIZ1	0.183612	3.2834	1.18514	0.237048	0.364211	-6.13529
ENSG00000108179	PPIF	0.409338	5.67899	2.31653	0.021309	0.0572699	-4.19847
ENSG00000108187	PBLD	0.226843	0.22675	1.38965	0.165825	0.279885	-5.5846
ENSG00000108219	TSPAN14	0.296945	3.84198	2.34206	0.0199346	0.0544195	-4.1446
ENSG00000108244	KRT23	-0.022943	2.25743	-0.115863	0.907851	0.942312	-6.78191
ENSG00000108256	NUFIP2	0.210485	2.83814	1.36799	0.1725	0.288399	-5.89168
ENSG00000108262	GIT1	-0.198925	0.763977	-1.37612	0.169971	0.285284	-5.7213
ENSG00000108298	RPL19	-0.345319	4.63561	-2.07757	0.0387324	0.0912158	-4.71595
ENSG00000108312	UBTF	-0.281825	1.59609	-2.46541	0.0143337	0.0419944	-3.78477
ENSG00000108342	CSF3	0.424838	0.0535444	1.32125	0.187582	0.306993	-5.61131
ENSG00000108344	PSMD3	-0.0310672	1.4568	-0.230681	0.817745	0.878904	-6.70579
ENSG00000108349	CASC3	-0.0632851	3.02529	-0.582268	0.560892	0.68308	-6.66084
ENSG00000108352	RAPGEFL1	-0.554104	0.444385	-3.39349	0.000798024	0.00416309	-1.05466
ENSG00000108387	SEPTIN4	0.0336173	0.931615	0.164181	0.869716	0.916549	-6.65607
ENSG00000108389	MTMR4	0.0812019	1.04096	0.512013	0.609078	0.722381	-6.54641
ENSG00000108395	TRIM37	-0.0224451	-0.194857	-0.108762	0.913475	0.945558	-6.44722
ENSG00000108405	P2RX1	-0.00758565	1.61624	-0.0380737	0.969658	0.98112	-6.74392
ENSG00000108406	DHX40	0.146732	0.733259	0.949526	0.343237	0.477978	-6.1809
ENSG00000108423	TUBD1	-0.167564	-0.333748	-0.855686	0.392961	0.527449	-6.07422
ENSG00000108424	KPNB1	0.598023	4.09898	5.0198	9.62139e-07	1.60668e-05	5.08989
ENSG00000108433	GOSR2	-0.118319	1.05674	-0.999875	0.318303	0.452894	-6.19026
ENSG00000108439	PNPO	-0.604288	-0.240139	-3.39116	0.000804544	0.00419044	-0.984229
ENSG00000108443	RPS6KB1	0.0969064	1.1047	0.637091	0.524628	0.650235	-6.48915
ENSG00000108465	CDK5RAP3	0.130519	2.49126	1.17421	0.241387	0.369035	-6.12383
ENSG00000108468	CBX1	-0.0594244	0.313159	-0.437007	0.66247	0.763454	-6.46285
ENSG00000108469	RECQL5	-0.195906	0.818132	-1.13605	0.256985	0.386223	-6.02679
ENSG00000108474	PIGL	-0.832746	0.99889	-3.15791	0.00177701	0.00795853	-1.88494
ENSG00000108479	GALK1	0.115761	0.688097	0.77803	0.437261	0.571253	-6.3168
ENSG00000108509	CAMTA2	-0.282991	2.39935	-2.08442	0.0381006	0.0900077	-4.67534
[truncated: 7,845 more rows]

## Sheet: B (LRTI v IPC)
ENSEMBL_ID	gene_symbol	logFC	AveExpr	t	P.Value	adj.P.Val	B
ENSG00000000419	DPM1	0.0140697	1.07824	0.12536	0.900328	0.939058	-6.48613
ENSG00000000938	FGR	0.200763	5.77303	1.87824	0.0613837	0.143589	-4.9031
ENSG00000001036	FUCA2	-0.292431	0.914216	-3.10658	0.00208636	0.0115189	-1.83201
ENSG00000001084	GCLC	-0.44839	1.00521	-3.06352	0.0023998	0.012825	-1.97781
ENSG00000001167	NFYA	0.21795	1.2256	1.89804	0.0587152	0.139342	-4.74202
ENSG00000001626	CFTR	-0.0441206	1.78605	-0.152644	0.878788	0.925203	-6.55935
ENSG00000001629	ANKIB1	0.31932	1.30408	2.59184	0.0100455	0.0378302	-3.24393
ENSG00000001630	CYP51A1	0.119082	0.477262	0.896052	0.370992	0.518019	-5.99582
ENSG00000001631	KRIT1	-0.125218	0.749377	-0.972967	0.331407	0.478369	-5.98831
ENSG00000002016	RAD52	-0.0331446	-0.369314	-0.224088	0.822851	0.887694	-6.20635
ENSG00000002330	BAD	-0.186195	0.632203	-1.16656	0.244376	0.384695	-5.77421
ENSG00000002549	LAP3	0.985176	3.85789	4.81239	2.438e-06	5.75533e-05	4.33165
ENSG00000002586	CD99	-0.204758	3.24764	-1.82331	0.069319	0.156222	-5.01156
ENSG00000002587	HS3ST1	-0.141534	0.075178	-0.704678	0.481595	0.619989	-6.088
ENSG00000002822	MAD1L1	-0.171297	1.91514	-1.27153	0.204591	0.338487	-5.79292
ENSG00000002834	LASP1	0.0241942	3.80897	0.337603	0.735915	0.827606	-6.59228
ENSG00000002919	SNX11	0.0821929	1.73099	0.728635	0.466832	0.607471	-6.30155
ENSG00000002933	TMEM176A	0.5004	1.81734	2.97872	0.00314733	0.0157591	-2.26106
ENSG00000003056	M6PR	0.203751	3.48283	1.81786	0.07015	0.157452	-5.02326
ENSG00000003147	ICA1	-0.525753	0.0509167	-3.23013	0.00138437	0.00856552	-1.36416
ENSG00000003393	ALS2	-0.251142	0.267817	-2.04548	0.0417384	0.108869	-4.35084
ENSG00000003400	CASP10	0.558672	1.66682	3.86364	0.00013876	0.00149094	0.609903
ENSG00000003402	CFLAR	0.311217	6.4474	3.80352	0.000175045	0.00177096	0.332223
ENSG00000003436	TFPI	-0.651393	0.282693	-4.93262	1.39096e-06	3.6224e-05	4.97702
ENSG00000003509	NDUFAF7	0.159958	-0.147781	1.19861	0.231689	0.370131	-5.55851
ENSG00000003756	RBM5	0.113296	3.77088	1.54569	0.123305	0.237677	-5.47392
ENSG00000004059	ARF5	0.0216986	2.82694	0.232155	0.816587	0.883254	-6.60401
ENSG00000004142	POLDIP2	0.124649	0.506391	1.11894	0.264121	0.407381	-5.77757
ENSG00000004399	PLXND1	-0.215522	2.63361	-1.67313	0.0954155	0.197326	-5.2523
ENSG00000004455	AK2	0.0502672	2.35002	0.497	0.619578	0.735543	-6.48852
ENSG00000004468	CD38	1.03556	1.45437	5.00815	9.72402e-07	2.73495e-05	5.28923
ENSG00000004478	FKBP4	-0.344432	1.54827	-2.16715	0.0310639	0.0871702	-4.27485
ENSG00000004487	KDM1A	-0.330547	-0.116787	-2.81815	0.00517307	0.022846	-2.50558
ENSG00000004534	RBM6	-0.0131388	1.90987	-0.161756	0.871615	0.920966	-6.56905
ENSG00000004660	CAMKK1	0.0629212	-0.0460097	0.447021	0.655205	0.764561	-6.19387
ENSG00000004700	RECQL	0.198351	0.289938	1.5423	0.124126	0.238745	-5.18521
ENSG00000004766	VPS50	-0.261812	0.125096	-1.72901	0.0849052	0.180983	-4.90166
ENSG00000004779	NDUFAB1	-0.230772	0.616793	-1.29928	0.194914	0.328325	-5.61725
ENSG00000004838	ZMYND10	-0.962071	0.154483	-4.2531	2.87396e-05	0.00043127	2.15002
ENSG00000004864	SLC25A13	0.115607	2.688	0.654366	0.513412	0.646956	-6.41427
ENSG00000004866	ST7	-0.98312	-0.417974	-5.79789	1.80314e-08	9.86117e-07	9.07293
ENSG00000004897	CDC27	0.0237269	1.9258	0.255055	0.798867	0.871556	-6.55212
ENSG00000004975	DVL2	-0.00259199	1.24429	-0.0219292	0.98252	0.989253	-6.52058
ENSG00000005001	PRSS22	-0.244295	0.26716	-1.04609	0.296419	0.441112	-5.84428
ENSG00000005007	UPF1	0.102339	2.44454	1.24355	0.214703	0.350098	-5.8535
ENSG00000005020	SKAP2	0.243721	3.43946	2.10555	0.036131	0.0974182	-4.47304
ENSG00000005022	SLC25A5	-0.306512	2.40555	-2.56937	0.0107047	0.0396751	-3.40275
ENSG00000005059	MCUB	0.175575	1.20374	1.17544	0.240816	0.380497	-5.82059
ENSG00000005075	POLR2J	0.154801	1.47566	1.17926	0.239294	0.379169	-5.85436
ENSG00000005156	LIG3	-0.283161	1.15471	-2.31307	0.0214412	0.066415	-3.9168
ENSG00000005175	RPAP3	0.15433	0.300805	0.993562	0.321291	0.46772	-5.87088
ENSG00000005187	ACSM3	0.020931	0.976123	0.122966	0.902222	0.939838	-6.47085
ENSG00000005194	CIAPIN1	-0.127812	0.0525137	-0.900245	0.368761	0.516297	-5.92867
ENSG00000005206	SPPL2B	-0.334378	1.02279	-2.28801	0.0228799	0.0698603	-3.96069
ENSG00000005238	FAM214B	0.0152821	1.83519	0.124732	0.900825	0.939377	-6.56657
ENSG00000005302	MSL3	0.561697	2.87542	4.79367	2.6581e-06	6.16335e-05	4.26259
ENSG00000005339	CREBBP	-0.0060708	4.54049	-0.0396468	0.968403	0.981594	-6.64749
ENSG00000005379	TSPOAP1	0.24443	1.38784	1.34508	0.179685	0.309875	-5.6329
ENSG00000005448	WDR54	-0.960016	-0.687194	-5.33706	1.94892e-07	7.17578e-06	6.84057
ENSG00000005483	KMT2E	0.215492	3.8906	2.47369	0.013964	0.0486417	-3.66138
ENSG00000005486	RHBDD2	-0.101878	2.90589	-0.95205	0.34189	0.488826	-6.18819
ENSG00000005700	IBTK	-0.153357	0.184738	-1.48762	0.137972	0.257415	-5.27728
ENSG00000005801	ZNF195	-0.400342	0.104364	-2.6475	0.00856684	0.0336252	-2.98766
ENSG00000005810	MYCBP2	0.198577	2.10196	1.92759	0.0549147	0.132662	-4.77223
ENSG00000005812	FBXL3	0.372168	1.52143	3.22971	0.00138632	0.00856927	-1.49903
ENSG00000005844	ITGAL	0.350253	3.10404	3.23941	0.00134167	0.00836199	-1.55211
ENSG00000005884	ITGA3	-0.487323	-0.114763	-2.60859	0.00957806	0.0366161	-3.05377
ENSG00000005889	ZFX	0.18163	2.3305	1.69506	0.0911725	0.190921	-5.1946
ENSG00000005893	LAMP2	0.296669	3.43312	2.70489	0.00724989	0.0295397	-3.07948
ENSG00000006007	GDE1	-0.273111	0.699227	-2.27904	0.0234147	0.0710087	-3.92993
ENSG00000006015	REX1BD	-0.235561	0.724463	-1.83722	0.0672328	0.153168	-4.81088
ENSG00000006118	TMEM132A	-0.162933	0.941961	-1.16619	0.244526	0.38483	-5.8231
ENSG00000006125	AP2B1	0.00914033	3.23832	0.0979604	0.922034	0.951605	-6.6367
ENSG00000006194	ZNF263	-0.107275	0.103797	-0.954684	0.340558	0.487639	-5.89398
ENSG00000006282	SPATA20	-0.383924	0.265684	-3.32506	0.0010015	0.00680382	-1.10039
ENSG00000006327	TNFRSF12A	-0.415982	0.799955	-2.01285	0.0450841	0.115095	-4.50826
ENSG00000006451	RALA	0.0446708	1.87294	0.361176	0.71824	0.813994	-6.51216
ENSG00000006453	BAIAP2L1	-0.122427	0.847417	-1.00561	0.315469	0.462055	-5.9778
ENSG00000006459	KDM7A	0.423082	1.11929	3.54711	0.000456224	0.00377206	-0.441715
ENSG00000006530	AGK	0.0169943	1.29591	0.159694	0.873237	0.921443	-6.50809
ENSG00000006534	ALDH3B1	-0.274468	1.64536	-2.21056	0.0278717	0.0805783	-4.18635
ENSG00000006576	PHTF2	0.0503468	-0.0260621	0.38569	0.700018	0.799748	-6.21662
ENSG00000006607	FARP2	-0.452611	0.705639	-2.78708	0.00568111	0.0245464	-2.71574
ENSG00000006634	DBF4	0.398738	-0.199378	2.4186	0.0162162	0.0539845	-3.42992
ENSG00000006652	IFRD1	0.0611362	4.28867	0.448983	0.65379	0.763634	-6.54985
ENSG00000006712	PAF1	0.248006	2.7213	2.58339	0.0102891	0.0384848	-3.37172
ENSG00000006715	VPS41	-0.0414428	1.98982	-0.378334	0.705468	0.80387	-6.51858
ENSG00000006744	ELAC2	-0.179198	0.678174	-1.39116	0.165278	0.29273	-5.50183
ENSG00000006747	SCIN	-0.333982	0.0973832	-2.04261	0.0420246	0.109355	-4.33389
ENSG00000006756	ARSD	-0.221982	0.368146	-2.23034	0.0265144	0.0777272	-3.98969
ENSG00000006831	ADIPOR2	-0.104521	1.58402	-1.00949	0.31361	0.460292	-6.0585
ENSG00000006837	CDKL3	0.195138	-0.137009	1.18705	0.236213	0.37559	-5.58391
ENSG00000007047	MARK4	-0.100431	1.65438	-1.0065	0.31504	0.461703	-6.06657
ENSG00000007062	PROM1	-1.07141	-0.450082	-4.92361	1.45122e-06	3.72122e-05	4.96866
ENSG00000007080	CCDC124	-0.277497	1.1781	-2.16521	0.0312135	0.087439	-4.24011
ENSG00000007129	CEACAM21	-0.0883351	-0.351632	-0.562007	0.57456	0.697664	-6.08668
ENSG00000007168	PAFAH1B1	0.153912	3.50359	2.11366	0.035426	0.096229	-4.45791
ENSG00000007174	DNAH9	-1.06424	-0.500912	-5.56487	6.11965e-08	2.63065e-06	7.92702
ENSG00000007202	KIAA0100	-0.114669	2.16576	-1.29218	0.197356	0.330854	-5.78089
ENSG00000007237	AC005747.1	0.420786	3.71903	3.25664	0.00126566	0.00804853	-1.5098
ENSG00000007264	MATK	-0.51801	0.153213	-3.11105	0.00205609	0.0113826	-1.74195
ENSG00000007341	ST7L	0.187512	0.981589	1.67314	0.0954135	0.197326	-5.102
ENSG00000007392	LUC7L	-0.124655	1.0478	-1.33059	0.184402	0.315356	-5.63121
ENSG00000007516	BAIAP3	-0.775269	0.190872	-4.24137	3.01891e-05	0.000446134	2.111
ENSG00000007520	TSR3	-0.146242	0.580995	-1.06724	0.286781	0.432021	-5.87223
ENSG00000007541	PIGQ	-0.452652	0.395701	-2.99246	0.00301326	0.0152742	-2.10662
ENSG00000007545	CRAMP1	-0.0114995	-0.0346407	-0.0674616	0.946262	0.967692	-6.28586
ENSG00000007923	DNAJC11	-0.51624	0.309874	-3.65127	0.000311155	0.00278963	-0.0420073
ENSG00000007944	MYLIP	0.570963	1.24428	4.07275	6.04797e-05	0.000776221	1.41414
ENSG00000008018	PSMB1	0.205498	2.33006	1.64036	0.102049	0.20695	-5.28438
ENSG00000008083	JARID2	0.101618	1.82867	0.957117	0.339331	0.486652	-6.12172
ENSG00000008086	CDKL5	-0.396594	0.785861	-2.53249	0.0118704	0.04315	-3.36784
ENSG00000008128	CDK11A	0.118182	2.20905	1.04448	0.29716	0.441926	-6.06294
ENSG00000008130	NADK	0.640955	5.63676	5.54845	6.66045e-08	2.85067e-06	7.76063
ENSG00000008226	DLEC1	-0.701474	-0.295628	-4.47262	1.12287e-05	0.000200034	3.06775
ENSG00000008256	CYTH3	-0.145048	-0.0465169	-0.976597	0.329609	0.476387	-5.84694
ENSG00000008282	SYPL1	-0.195499	1.09402	-1.7717	0.0775285	0.169109	-4.97257
ENSG00000008283	CYB561	-0.621817	0.119114	-3.54538	0.000459102	0.00377561	-0.385606
ENSG00000008294	SPAG9	-0.141489	4.46957	-1.38315	0.167716	0.295084	-5.70703
ENSG00000008323	PLEKHG6	0.132	1.76165	0.828292	0.408208	0.553944	-6.22653
ENSG00000008382	MPND	0.0232615	0.137452	0.148398	0.882135	0.927529	-6.31758
ENSG00000008394	MGST1	-0.555362	1.53666	-3.29017	0.00112901	0.00747412	-1.34304
ENSG00000008438	PGLYRP1	0.407106	0.987456	1.81112	0.071191	0.159237	-4.84822
ENSG00000008513	ST3GAL1	0.0620595	3.28286	0.604914	0.545725	0.673957	-6.46164
ENSG00000008516	MMP25	0.630975	4.66206	3.12671	0.0019532	0.0109682	-1.90703
ENSG00000008517	IL32	0.472578	2.10362	2.44678	0.0150269	0.0511252	-3.66301
ENSG00000008710	PKD1	-0.55959	1.29605	-3.69407	0.000265195	0.00247448	0.00114349
ENSG00000008838	MED24	-0.196362	1.82673	-1.6772	0.0946151	0.196248	-5.20456
ENSG00000008869	HEATR5B	0.202768	0.872123	1.41147	0.159211	0.285185	-5.47392
ENSG00000008952	SEC62	-0.127208	3.53371	-1.24276	0.214991	0.350219	-5.88691
ENSG00000008988	RPS20	-0.136779	4.63141	-1.08196	0.2802	0.424548	-6.07037
ENSG00000009307	CSDE1	-0.0105697	3.8003	-0.120987	0.903788	0.940479	-6.64142
ENSG00000009335	UBE3C	-0.206348	1.1164	-2.21578	0.0275084	0.0798448	-4.12261
ENSG00000009413	REV3L	-0.0355113	1.33568	-0.250426	0.802441	0.874002	-6.49493
ENSG00000009780	FAM76A	-0.327231	-0.0168128	-2.2293	0.0265849	0.0778388	-3.93015
ENSG00000009790	TRAF3IP3	0.272301	2.91298	1.91783	0.0561456	0.134969	-4.82741
ENSG00000009830	POMT2	-0.227462	0.00338938	-1.2487	0.212815	0.347768	-5.57135
ENSG00000009844	VTA1	0.450642	0.600976	3.08523	0.00223674	0.0121918	-1.81842
ENSG00000009954	BAZ1B	-0.0636461	0.266415	-0.615975	0.53841	0.668193	-6.17467
ENSG00000010017	RANBP9	0.127766	1.31707	1.2579	0.209473	0.34392	-5.74387
ENSG00000010030	ETV7	1.71515	0.822021	6.21399	1.85813e-09	1.45415e-07	11.2168
ENSG00000010219	DYRK4	-0.726157	-0.424299	-3.96533	9.30595e-05	0.00108412	1.13296
ENSG00000010244	ZNF207	0.34272	3.73828	3.86895	0.000135925	0.00146716	0.54728
ENSG00000010256	UQCRC1	-0.0264384	2.58408	-0.267309	0.789428	0.865863	-6.58687
ENSG00000010270	STARD3NL	-0.0202139	1.52476	-0.244433	0.807074	0.877331	-6.52027
ENSG00000010278	CD9	-0.577833	2.67546	-3.17669	0.0016557	0.0096843	-1.74323
ENSG00000010292	NCAPD2	0.0533426	0.514749	0.461683	0.644666	0.756478	-6.29968
ENSG00000010295	IFFO1	0.196084	0.19919	1.88134	0.0609596	0.142946	-4.61585
ENSG00000010310	GIPR	-0.558631	-0.3554	-3.54447	0.000460624	0.00378496	-0.323054
ENSG00000010322	NISCH	0.0319005	1.42359	0.370148	0.711551	0.808555	-6.46927
ENSG00000010327	STAB1	0.290791	2.61387	2.00347	0.0460865	0.117173	-4.65142
ENSG00000010361	FUZ	-0.628873	-0.0125132	-3.81303	0.000168763	0.00172599	0.555274
ENSG00000010404	IDS	-0.147104	3.33502	-1.79868	0.0731426	0.162239	-5.05723
ENSG00000010539	ZNF200	0.43628	1.44646	3.50662	0.000528145	0.00422002	-0.608161
ENSG00000010610	CD4	-0.328685	1.98933	-2.91481	0.00384553	0.0183311	-2.47279
ENSG00000010626	LRRC23	-0.859857	0.342524	-4.56368	7.52141e-06	0.000146326	3.38726
ENSG00000010671	BTK	0.358468	1.93386	3.08188	0.00226121	0.0122776	-1.97285
ENSG00000010803	SCMH1	-0.284914	-0.175312	-2.10534	0.0361493	0.0974408	-4.15954
ENSG00000010810	FYN	0.317173	2.10493	2.23302	0.026335	0.0773393	-4.1489
ENSG00000010818	HIVEP2	0.332535	2.1545	2.57473	0.010544	0.0391385	-3.36403
ENSG00000011007	ELOA	-0.0724502	0.299853	-0.595838	0.551763	0.678944	-6.19029
ENSG00000011009	LYPLA2	0.0635636	1.89635	0.676818	0.499078	0.634663	-6.3519
ENSG00000011021	CLCN6	0.178848	1.22505	1.46847	0.143095	0.264779	-5.45014
ENSG00000011114	BTBD7	0.0393631	0.816407	0.405322	0.685549	0.789771	-6.37481
ENSG00000011132	APBA3	0.141799	0.883223	1.14909	0.251495	0.39295	-5.81646
ENSG00000011198	ABHD5	-0.192533	2.38735	-1.4198	0.156774	0.28198	-5.62684
ENSG00000011243	AKAP8L	-0.0891589	2.06243	-0.996796	0.319721	0.466134	-6.1062
ENSG00000011260	UTP18	0.241428	1.51057	2.21671	0.0274435	0.0797148	-4.14376
ENSG00000011275	RNF216	-0.120289	0.833268	-1.12508	0.261516	0.404902	-5.84478
ENSG00000011295	TTC19	-0.24912	0.79119	-2.13106	0.0339523	0.0932111	-4.2623
ENSG00000011304	PTBP1	-0.0446119	3.10325	-0.44257	0.658418	0.767309	-6.54243
ENSG00000011405	PIK3C2A	-0.104656	0.354245	-0.782016	0.434864	0.577316	-6.08431
ENSG00000011422	PLAUR	0.0650161	7.47071	0.499628	0.617728	0.734055	-6.47219
ENSG00000011451	WIZ	-0.111559	0.162344	-1.0095	0.313604	0.460292	-5.85541
ENSG00000011454	RABGAP1	-0.0382305	1.55304	-0.369286	0.712193	0.80891	-6.4842
ENSG00000011485	PPP5C	-0.409383	0.35688	-2.89382	0.0041041	0.0192293	-2.37461
ENSG00000011523	CEP68	0.279395	1.33224	2.42099	0.0161121	0.0537106	-3.66518
ENSG00000011566	MAP4K3	-0.320714	0.846333	-2.15541	0.0319791	0.0890529	-4.21836
ENSG00000011600	TYROBP	0.236862	6.85528	2.89842	0.00404614	0.0190484	-2.53153
ENSG00000011638	TMEM159	0.00103151	0.288524	0.00818509	0.993475	0.99702	-6.36114
ENSG00000012048	BRCA1	-0.0240468	0.478409	-0.166333	0.868015	0.918394	-6.38606
ENSG00000012061	ERCC1	-0.473365	1.87993	-4.56505	7.47583e-06	0.000146016	3.30269
ENSG00000012124	CD22	0.45535	2.58082	2.16584	0.0311645	0.0873585	-4.31983
ENSG00000012171	SEMA3B	0.25076	-0.0117831	1.69549	0.0910896	0.190865	-4.89465
ENSG00000012211	PRICKLE3	0.0268541	-0.12501	0.202347	0.839792	0.898089	-6.26122
ENSG00000012223	LTF	0.303413	1.15748	1.67518	0.0950111	0.196779	-5.11526
ENSG00000012232	EXTL3	0.0893488	1.57963	0.735941	0.462381	0.603111	-6.28322
ENSG00000012660	ELOVL5	0.281032	3.21872	3.05853	0.00243885	0.0129563	-2.09963
ENSG00000012779	ALOX5	0.328948	5.48555	2.83488	0.00491699	0.0219415	-2.73074
ENSG00000012822	CALCOCO1	-0.272625	2.06088	-3.04271	0.00256635	0.0135097	-2.11328
ENSG00000012983	MAP4K5	-0.561237	0.731981	-3.97717	8.87843e-05	0.00104545	1.06299
ENSG00000013275	PSMC4	-0.0421958	1.77202	-0.457469	0.647687	0.758938	-6.46908
ENSG00000013288	MAN2B2	-0.0932596	0.743272	-1.02192	0.307698	0.453712	-5.93629
ENSG00000013306	SLC25A39	-0.149526	1.47128	-1.30778	0.192018	0.324503	-5.71117
ENSG00000013364	MVP	0.131445	4.27522	1.95211	0.0519187	0.127996	-4.78163
ENSG00000013374	NUB1	0.733568	2.92987	4.33266	2.0532e-05	0.000323906	2.33477
ENSG00000013375	PGM3	-0.355123	0.0373768	-2.03467	0.042823	0.110759	-4.34272
ENSG00000013441	CLK1	0.265617	3.57953	2.70295	0.00729132	0.0296839	-3.08672
ENSG00000013561	RNF14	-0.0481945	0.67171	-0.417687	0.676495	0.782448	-6.3449
ENSG00000013563	DNASE1L1	0.0944207	1.35842	0.746929	0.455731	0.597605	-6.2447
ENSG00000013573	DDX11	-0.415021	0.858829	-1.97896	0.0487968	0.122343	-4.57323
ENSG00000013583	HEBP1	-0.115292	0.326131	-0.911915	0.362595	0.509549	-5.97844
ENSG00000013588	GPRC5A	-0.335275	0.936696	-1.46955	0.142804	0.264389	-5.43731
ENSG00000013725	CD6	-0.163179	1.16157	-1.20337	0.229847	0.368084	-5.80622
ENSG00000013810	TACC3	0.166282	2.03023	1.5006	0.134583	0.252686	-5.47899
ENSG00000014164	ZC3H3	0.248175	1.93644	2.04639	0.0416483	0.108692	-4.52925
ENSG00000014216	CAPN1	-0.0635618	2.90904	-0.793286	0.42828	0.571505	-6.32386
ENSG00000014257	ACPP	0.463739	0.500572	2.89678	0.00406668	0.0190994	-2.33555
ENSG00000014824	SLC30A9	-0.123463	0.509241	-1.09787	0.273202	0.417674	-5.82225
ENSG00000014919	COX15	0.00987661	0.450849	0.0883437	0.929666	0.956484	-6.38465
ENSG00000015133	CCDC88C	-0.323085	1.33149	-2.44105	0.0152622	0.0516471	-3.64016
ENSG00000015153	YAF2	0.0648814	1.05467	0.495174	0.620864	0.736626	-6.36987
ENSG00000015171	ZMYND11	-0.330798	0.0178075	-2.62892	0.00903717	0.0350934	-3.01393
ENSG00000015285	WAS	0.526364	4.05497	4.98267	1.09774e-06	2.97691e-05	5.08458
ENSG00000015475	BID	0.19768	4.52211	1.67969	0.09413	0.195695	-5.26297
ENSG00000015479	MATR3	-0.193935	2.40576	-1.98573	0.0480351	0.120874	-4.68704
ENSG00000015568	RGPD5	-0.692273	2.23433	-3.81622	0.000166702	0.00171835	0.377939
ENSG00000015676	NUDCD3	-0.165072	0.655161	-1.48268	0.139279	0.259082	-5.36644
ENSG00000016864	GLT8D1	-0.145927	0.134935	-1.0591	0.290464	0.435542	-5.79501
ENSG00000017260	ATP2C1	-0.0136574	2.15928	-0.12648	0.899443	0.938532	-6.59145
ENSG00000017483	SLC38A5	0.578723	-0.450245	2.69819	0.0073937	0.0299644	-2.70714
ENSG00000017797	RALBP1	-0.115727	1.64906	-1.45278	0.147402	0.270511	-5.52979
ENSG00000018189	RUFY3	-0.361277	1.55681	-3.18898	0.00158925	0.00941879	-1.65108
ENSG00000018280	SLC11A1	-0.245602	6.37133	-2.00597	0.0458178	0.116545	-4.64685
ENSG00000018510	AGPS	-0.343127	0.83104	-3.03995	0.00258921	0.0135937	-2.02415
ENSG00000019144	PHLDB1	-0.43499	0.470982	-2.72314	0.00687117	0.0283012	-2.85202
ENSG00000019169	MARCO	-1.11392	2.94622	-5.71151	2.84857e-08	1.43802e-06	8.5713
ENSG00000019582	CD74	-0.16772	7.02792	-1.01781	0.309644	0.455821	-6.09327
ENSG00000020577	SAMD4A	-0.110525	0.325836	-0.591185	0.554872	0.681067	-6.20356
ENSG00000020633	RUNX3	0.631582	1.7453	4.23901	3.04889e-05	0.000447959	2.01731
ENSG00000020922	MRE11	0.0805575	0.144424	0.727963	0.467242	0.607619	-6.07151
ENSG00000021355	SERPINB1	0.336884	5.88438	3.56254	0.000431313	0.00360734	-0.511481
ENSG00000021574	SPAST	0.171318	1.41287	1.99288	0.0472416	0.119549	-4.59079
ENSG00000021762	OSBPL5	0.224252	0.318971	1.34458	0.179844	0.31005	-5.47471
ENSG00000022277	RTF2	0.136487	3.53812	1.54195	0.124211	0.238862	-5.47724
ENSG00000022556	NLRP2	0.0715238	0.258674	0.429918	0.667585	0.775239	-6.25982
ENSG00000022567	SLC45A4	0.132059	2.73025	1.04943	0.294881	0.439753	-6.0837
ENSG00000022840	RNF10	0.169639	4.50551	1.99086	0.0474645	0.119959	-4.70667
ENSG00000023041	ZDHHC6	0.210955	1.01992	1.80723	0.071796	0.160117	-4.88139
ENSG00000023171	GRAMD1B	0.465519	0.994155	2.93172	0.0036482	0.0176389	-2.30638
ENSG00000023191	RNH1	-0.199741	2.9523	-1.7274	0.085195	0.181332	-5.17178
ENSG00000023228	NDUFS1	-0.115878	1.03553	-1.16036	0.246889	0.387929	-5.83631
ENSG00000023287	RB1CC1	-0.0364167	1.78442	-0.396918	0.691729	0.793828	-6.49698
ENSG00000023318	ERP44	0.32151	0.937127	2.77642	0.00586554	0.0251592	-2.72949
ENSG00000023330	ALAS1	0.0995875	1.9597	0.886293	0.376217	0.523175	-6.19596
ENSG00000023445	BIRC3	0.400995	2.12885	3.31699	0.00102975	0.0069669	-1.27258
ENSG00000023608	SNAPC1	0.0934169	0.369082	0.639691	0.522895	0.654799	-6.18045
ENSG00000023697	DERA	-0.0775735	0.198795	-0.611162	0.541587	0.669956	-6.15906
ENSG00000023734	STRAP	-0.132397	1.55893	-1.34907	0.178399	0.308423	-5.66412
ENSG00000023892	DEF6	0.521027	1.76608	4.41186	1.4619e-05	0.000248031	2.70116
ENSG00000023902	PLEKHO1	0.386874	2.49692	2.98103	0.00312441	0.0156682	-2.29827
ENSG00000023909	GCLM	0.224448	1.81669	1.56897	0.117781	0.229545	-5.36084
ENSG00000024048	UBR2	0.34526	1.50515	3.70585	0.000253719	0.00239235	0.0568693
ENSG00000024862	CCDC28A	0.352498	0.454493	2.5529	0.0112118	0.041137	-3.21629
ENSG00000025039	RRAGD	-0.0619906	1.62566	-0.558898	0.576677	0.699717	-6.40761
ENSG00000025293	PHF20	-0.260453	2.58599	-2.59707	0.00989734	0.0374654	-3.34082
ENSG00000025434	NR1H3	-0.0307328	2.26405	-0.189145	0.850116	0.905784	-6.58904
ENSG00000025708	TYMP	0.438236	6.38739	4.44019	1.29314e-05	0.000224508	2.76687
ENSG00000025770	NCAPH2	-0.234173	0.918855	-2.1124	0.0355345	0.0964704	-4.31569
ENSG00000025796	SEC63	-0.0439726	1.88842	-0.402383	0.687708	0.791315	-6.50366
ENSG00000025800	KPNA6	0.026573	0.707967	0.256088	0.79807	0.871034	-6.40155
ENSG00000026025	VIM	-0.0963451	7.42964	-0.844066	0.399351	0.545622	-6.24447
ENSG00000026103	FAS	0.799857	2.50805	5.37043	1.64848e-07	6.19374e-06	6.91578
ENSG00000026297	RNASET2	0.267469	3.8677	2.55722	0.0110769	0.0407935	-3.45815
ENSG00000026508	CD44	0.0518892	7.55334	0.490365	0.624258	0.739494	-6.47465
ENSG00000026652	AGPAT4	0.0172271	1.00752	0.138854	0.889665	0.932028	-6.47297
ENSG00000026751	SLAMF7	1.35953	4.27423	6.61238	1.90061e-10	2.46179e-08	13.3834
ENSG00000026950	BTN3A1	0.950835	1.90149	5.40414	1.39092e-07	5.32771e-06	7.10532
ENSG00000027075	PRKCH	-0.314419	4.04021	-2.11588	0.0352347	0.0959741	-4.45766
ENSG00000027697	IFNGR1	0.149593	4.22906	1.29198	0.197425	0.330913	-5.82821
ENSG00000027847	B4GALT7	-0.478926	-0.484927	-2.97843	0.00315017	0.0157594	-2.01891
ENSG00000027869	SH2D2A	0.231622	-0.23556	1.28422	0.200122	0.333728	-5.4367
ENSG00000028116	VRK2	0.216549	1.10782	2.00004	0.046458	0.117839	-4.53289
ENSG00000028137	TNFRSF1B	0.332853	5.79793	2.40883	0.0166474	0.0549001	-3.80027
ENSG00000028203	VEZT	-0.155922	1.21156	-1.46559	0.143878	0.265703	-5.46989
ENSG00000028277	POU2F2	0.0870491	1.79571	0.533078	0.594401	0.715173	-6.4307
ENSG00000028310	BRD9	-0.35172	1.39074	-3.30861	0.00105984	0.00711186	-1.26734
ENSG00000028528	SNX1	0.177114	3.57271	1.59984	0.110757	0.219551	-5.3883
ENSG00000028839	TBPL1	0.906472	1.64049	4.48487	1.06435e-05	0.000192912	3.02252
ENSG00000029153	ARNTL2	0.476308	0.532267	3.18502	0.00161039	0.00947561	-1.51836
ENSG00000029363	BCLAF1	0.0938256	2.87586	1.08712	0.277914	0.422515	-6.04954
ENSG00000029364	SLC39A9	0.201985	0.712647	2.26394	0.0243405	0.0730415	-3.93989
ENSG00000029725	RABEP1	-0.0461275	1.46978	-0.443056	0.658066	0.76699	-6.44485
ENSG00000029993	HMGB3	-0.525739	1.509	-1.95575	0.0514853	0.127217	-4.69749
ENSG00000030066	NUP160	-0.145583	1.31579	-1.25248	0.211435	0.346144	-5.76416
ENSG00000030110	BAK1	0.345492	0.395144	2.59701	0.00989917	0.0374654	-3.11123
ENSG00000030582	GRN	0.067722	5.90755	0.552874	0.580789	0.70332	-6.47836
ENSG00000031003	FAM13B	-0.0226162	1.81347	-0.255974	0.798158	0.871034	-6.54457
ENSG00000031081	ARHGAP31	0.423672	0.983322	3.17385	0.00167138	0.00973557	-1.61037
ENSG00000031698	SARS1	-0.0184173	1.19344	-0.193332	0.846839	0.903564	-6.49125
ENSG00000031823	RANBP3	0.071376	2.06282	0.655375	0.512763	0.646657	-6.37917
ENSG00000032219	ARID4A	0.295647	1.7146	3.03401	0.00263911	0.0137821	-2.09933
ENSG00000032389	EIPR1	0.0901324	0.368687	0.70523	0.481251	0.619759	-6.13137
ENSG00000032444	PNPLA6	-0.121447	4.19766	-1.05628	0.291748	0.436603	-6.09994
ENSG00000032742	IFT88	-0.125761	-0.350903	-0.92932	0.353521	0.500152	-5.8262
ENSG00000033030	ZCCHC8	-0.0335932	0.145141	-0.373004	0.709427	0.806886	-6.27105
ENSG00000033050	ABCF2	-0.390856	-0.304081	-2.50455	0.0128275	0.0458011	-3.26425
ENSG00000033100	CHPF2	0.0915208	1.021	0.96283	0.336461	0.483733	-6.02944
ENSG00000033170	FUT8	-0.345161	0.188067	-2.01494	0.0448638	0.114801	-4.3987
ENSG00000033178	UBA6	0.193484	1.97713	1.5961	0.111591	0.22076	-5.33162
ENSG00000033327	GAB2	-0.0547266	3.47296	-0.530775	0.595994	0.716305	-6.507
ENSG00000033627	ATP6V0A1	-0.0706383	3.04071	-0.638561	0.523629	0.655326	-6.43752
ENSG00000033800	PIAS1	0.193751	2.79541	2.0208	0.0442489	0.113552	-4.62784
ENSG00000033867	SLC4A7	-0.110152	0.0284398	-0.869519	0.385306	0.531821	-5.94681
ENSG00000034152	MAP2K3	-0.172167	4.92931	-1.50001	0.134735	0.252827	-5.5373
ENSG00000034239	EFCAB1	-0.876906	-0.549144	-4.03496	7.04524e-05	0.000880119	1.39523
ENSG00000034510	TMSB10	0.197966	6.89997	1.42952	0.153967	0.278305	-5.606
ENSG00000034677	RNF19A	-0.0690017	2.72838	-0.735151	0.462861	0.603417	-6.36208
ENSG00000034713	GABARAPL2	0.121133	3.9246	1.09686	0.273642	0.418083	-6.0561
ENSG00000035115	SH3YL1	-0.323741	0.155701	-2.16794	0.0310031	0.087099	-4.09061
ENSG00000035403	VCL	0.0218013	0.928565	0.183242	0.85474	0.909039	-6.44981
ENSG00000035664	DAPK2	0.0176897	0.92989	0.111539	0.911269	0.945162	-6.47076
ENSG00000035681	NSMAF	0.219086	3.90395	1.70427	0.0894368	0.188062	-5.22186
ENSG00000035687	ADSS2	-0.0878757	1.01618	-0.87945	0.379909	0.527103	-6.10772
ENSG00000035862	TIMP2	0.0392552	2.99098	0.360297	0.718896	0.81455	-6.57041
ENSG00000035928	RFC1	-0.100476	1.52817	-0.800724	0.423968	0.567126	-6.23614
ENSG00000036054	TBC1D23	0.193417	1.08123	1.72975	0.0847731	0.180747	-5.02279
ENSG00000036257	CUL3	-0.0442685	2.82704	-0.493298	0.622187	0.737929	-6.51197
ENSG00000036549	AC118549.1	-0.234831	-0.142869	-1.50732	0.132851	0.250534	-5.19115
ENSG00000037241	RPL26L1	-0.300577	0.14472	-1.8325	0.0679346	0.154232	-4.72904
ENSG00000037474	NSUN2	-0.171431	0.922557	-1.85455	0.0647075	0.148932	-4.80528
ENSG00000037637	FBXO42	0.060866	0.0375031	0.593523	0.553309	0.679827	-6.1329
ENSG00000037749	MFAP3	0.0700038	1.07407	0.690301	0.490575	0.627037	-6.25833
ENSG00000037897	METTL1	-0.425642	-0.531937	-2.67611	0.00788558	0.0314911	-2.81393
ENSG00000038210	PI4K2B	0.61123	0.526986	3.2731	0.00119675	0.00774547	-1.23665
ENSG00000038219	BOD1L1	0.224608	2.54767	2.08601	0.0378796	0.100862	-4.4866
ENSG00000038274	MAT2B	0.51255	2.01214	4.61594	5.95909e-06	0.000120702	3.52943
ENSG00000038358	EDC4	0.0582735	1.38738	0.546988	0.584821	0.707072	-6.3838
ENSG00000038382	TRIO	-0.271987	2.7265	-2.52929	0.0119765	0.0434402	-3.5122
ENSG00000038427	VCAN	0.357223	4.3984	1.91705	0.0562453	0.135044	-4.84681
ENSG00000038532	CLEC16A	0.0814694	1.20014	0.860565	0.390211	0.536786	-6.1437
ENSG00000038945	MSR1	-0.837198	2.82079	-4.12852	4.81806e-05	0.000645235	1.52351
ENSG00000039068	CDH1	-0.509505	0.669619	-2.43132	0.0156695	0.0526273	-3.59821
ENSG00000039123	MTREX	-0.0879137	0.887229	-0.754217	0.45135	0.593679	-6.1887
ENSG00000039319	ZFYVE16	0.168651	3.40673	1.29104	0.197752	0.331279	-5.82324
ENSG00000039523	RIPOR1	-0.139957	2.62266	-1.27389	0.203754	0.33784	-5.82902
ENSG00000039560	RAI14	-0.786205	-0.443293	-4.37794	1.69186e-05	0.00027991	2.69721
ENSG00000039650	PNKP	-0.320005	2.60889	-2.40567	0.0167892	0.0552382	-3.8017
ENSG00000040341	STAU2	0.0180217	1.88762	0.185964	0.852607	0.907457	-6.56387
ENSG00000040487	SLC66A1	-0.148553	0.032855	-1.29096	0.197778	0.331279	-5.51385
ENSG00000040531	CTNS	0.0793102	1.4545	0.697443	0.486102	0.624124	-6.29698
ENSG00000040633	PHF23	0.0539588	2.1143	0.525102	0.599926	0.719881	-6.46161
ENSG00000040933	INPP4A	0.166709	1.97169	1.45001	0.148172	0.271409	-5.5497
ENSG00000041357	PSMA4	0.567547	3.17279	3.86524	0.000137902	0.00148686	0.545093
ENSG00000041802	LSG1	-0.0393149	0.234953	-0.317674	0.750969	0.838726	-6.30421
ENSG00000042062	RIPOR3	0.523412	0.517594	3.81622	0.000166703	0.00171835	0.550477
ENSG00000042088	TDP1	-0.183026	0.0426248	-1.34749	0.178909	0.308925	-5.45086
ENSG00000042429	MED17	0.0946432	1.33547	1.33352	0.183442	0.314491	-5.6531
ENSG00000042445	RETSAT	-0.0199991	0.63505	-0.210794	0.833201	0.894149	-6.40397
ENSG00000042493	CAPG	-0.143859	4.31706	-1.26284	0.207694	0.342151	-5.86426
ENSG00000042753	AP2S1	0.0208168	2.52069	0.162584	0.870963	0.920524	-6.60549
ENSG00000042832	TG	-0.163947	1.14292	-0.881335	0.37889	0.52599	-6.13105
ENSG00000042980	ADAM28	0.283251	0.67643	1.81083	0.0712348	0.159273	-4.8122
ENSG00000043093	DCUN1D1	0.126415	1.12024	1.06554	0.287547	0.432751	-5.93445
ENSG00000043143	JADE2	0.0400435	0.628203	0.30069	0.763874	0.847467	-6.3764
ENSG00000043462	LCP2	0.409015	7.0266	3.85159	0.000145408	0.00154578	0.513119
ENSG00000044115	CTNNA1	-0.245931	4.10403	-2.88019	0.00428036	0.0198754	-2.61562
ENSG00000044446	PHKA2	0.0229455	1.08661	0.170268	0.864922	0.916147	-6.47813
ENSG00000044574	HSPA5	-0.133158	3.97322	-1.10251	0.271185	0.4153	-6.05089
ENSG00000046651	OFD1	-0.137958	0.177679	-1.17836	0.239649	0.379478	-5.67757
ENSG00000047056	WDR37	0.151762	1.40436	1.42764	0.154507	0.278974	-5.53043
ENSG00000047188	YTHDC2	0.31057	0.598141	2.87434	0.00435808	0.0201224	-2.41685
ENSG00000047249	ATP6V1H	0.125879	2.62297	1.20452	0.229404	0.367669	-5.90833
ENSG00000047315	POLR2B	0.0641183	1.3045	0.617946	0.537112	0.667255	-6.32984
ENSG00000047346	FAM214A	-0.167611	0.952206	-1.48755	0.13799	0.257415	-5.40598
ENSG00000047365	ARAP2	0.578626	2.23102	4.16642	4.12258e-05	0.000569182	1.7039
ENSG00000047410	TPR	0.103631	2.21111	1.08098	0.280633	0.425008	-6.02406
ENSG00000047457	CP	0.022651	0.584511	0.104551	0.916806	0.948108	-6.40603
ENSG00000047578	KIAA0556	-0.115584	1.54455	-1.08386	0.279356	0.423856	-5.97913
ENSG00000047579	DTNBP1	0.596005	1.66601	5.06309	7.47489e-07	2.17701e-05	5.50902
ENSG00000047621	C12orf4	-0.0239005	0.640148	-0.167067	0.867438	0.917981	-6.41898
ENSG00000047644	WWC3	0.143275	0.70331	1.41667	0.157688	0.283241	-5.44822
ENSG00000047849	MAP4	-0.202326	1.71548	-2.24297	0.0256786	0.0758415	-4.11528
ENSG00000048052	HDAC9	-0.478247	-0.0120286	-2.8945	0.00409547	0.0192072	-2.31978
ENSG00000048342	CC2D2A	0.215387	3.41969	1.66196	0.0976363	0.200528	-5.28685
ENSG00000048392	RRM2B	0.186578	1.17494	1.4827	0.139276	0.259082	-5.41815
ENSG00000048405	ZNF800	0.0805758	0.84681	0.800704	0.42398	0.567126	-6.14088
ENSG00000048471	SNX29	-0.100893	1.09164	-0.87028	0.384891	0.531472	-6.12701
ENSG00000048649	RSF1	0.325781	2.21791	3.71911	0.000241359	0.00229438	0.0537284
ENSG00000048707	VPS13D	-0.0116576	2.09274	-0.0960493	0.92355	0.952381	-6.5921
ENSG00000048740	CELF2	0.338133	2.78792	3.65888	0.000302471	0.00272667	-0.177092
ENSG00000048828	FAM120A	-0.0278283	2.57126	-0.309119	0.75746	0.843012	-6.57406
ENSG00000048991	R3HDM1	-0.100179	1.49246	-0.702749	0.482794	0.621015	-6.30701
ENSG00000049089	COL9A2	-0.27319	0.10512	-1.36334	0.173868	0.302866	-5.43662
ENSG00000049239	H6PD	0.15307	0.5363	1.83366	0.0677618	0.153946	-4.76521
ENSG00000049245	VAMP3	0.360994	3.4278	2.68129	0.00776762	0.0311718	-3.13991
ENSG00000049540	ELN	-0.582893	0.805289	-3.0741	0.00231906	0.0124884	-1.93011
ENSG00000049541	RFC2	0.140133	0.421408	1.10047	0.272068	0.416458	-5.78987
ENSG00000049618	ARID1B	-0.11445	2.03387	-1.36081	0.174665	0.303888	-5.6848
ENSG00000049656	CLPTM1L	-0.259013	3.05697	-2.71568	0.00702386	0.0287736	-3.04883
ENSG00000049759	NEDD4L	-0.719718	1.27641	-4.09054	5.62643e-05	0.000731659	1.4378
ENSG00000049860	HEXB	-0.131278	3.34131	-1.11934	0.263952	0.407381	-6.02761
ENSG00000050130	JKAMP	0.0248342	0.857379	0.203849	0.838619	0.89742	-6.43312
ENSG00000050327	ARHGEF5	-0.902289	-0.522597	-5.64002	4.14316e-08	1.93883e-06	8.2903
ENSG00000050344	NFE2L3	0.452067	1.8548	3.1013	0.00212268	0.0116866	-1.90932
ENSG00000050405	LIMA1	-0.291572	0.0746059	-1.95572	0.0514891	0.127217	-4.48739
ENSG00000050426	LETMD1	-0.178527	0.652022	-1.46919	0.142901	0.26447	-5.39149
ENSG00000050438	SLC4A8	-0.499037	-0.0472869	-3.27974	0.00116998	0.0076072	-1.20375
ENSG00000050730	TNIP3	0.319366	3.26743	1.27346	0.203908	0.337925	-5.84054
ENSG00000050748	MAPK9	-0.295207	0.484463	-2.26165	0.0244837	0.0733469	-3.94594
ENSG00000050820	BCAR1	-1.2086	-0.23991	-5.70012	3.02454e-08	1.5061e-06	8.59109
ENSG00000051009	FAM160A2	-0.0396929	1.69813	-0.318031	0.750697	0.838709	-6.51756
ENSG00000051108	HERPUD1	0.059069	3.33638	0.521819	0.602207	0.721622	-6.50898
ENSG00000051128	HOMER3	0.00485539	1.40547	0.0379281	0.969772	0.982132	-6.53519
ENSG00000051382	PIK3CB	0.130594	1.53026	1.21102	0.226906	0.364323	-5.8224
ENSG00000051523	CYBA	0.117747	6.49389	1.10716	0.26917	0.413113	-6.01409
ENSG00000051596	THOC3	-0.364934	0.336392	-2.014	0.0449625	0.114929	-4.43022
ENSG00000051620	HEBP2	0.0534719	1.40869	0.394156	0.693765	0.795136	-6.45897
ENSG00000051825	MPHOSPH9	-0.14054	0.121695	-0.879172	0.380059	0.527167	-5.95914
ENSG00000052126	PLEKHA5	-0.611019	-0.131995	-3.81174	0.0001696	0.00172599	0.556348
ENSG00000052344	PRSS8	-0.429035	-0.0573969	-2.54804	0.0113656	0.0416076	-3.20634
ENSG00000052723	SIKE1	0.184126	0.370162	1.21144	0.226747	0.364185	-5.64809
ENSG00000052749	RRP12	-0.327812	2.07922	-2.5624	0.0109168	0.0402943	-3.40283
ENSG00000052795	FNIP2	0.343791	3.12051	2.43246	0.0156212	0.0525188	-3.74683
ENSG00000052802	MSMO1	-0.00357478	0.00375346	-0.0241471	0.980752	0.988282	-6.30384
ENSG00000052841	TTC17	0.0593965	1.45983	0.628228	0.530365	0.661461	-6.34038
ENSG00000053254	FOXN3	-0.253115	2.97911	-2.46035	0.0144819	0.0499191	-3.68454
ENSG00000053371	AKR7A2	-0.66815	-0.314055	-4.67554	4.55779e-06	9.77492e-05	3.90528
ENSG00000053501	USE1	-0.0129084	0.66495	-0.101408	0.919299	0.949689	-6.4272
ENSG00000053524	MCF2L2	-0.242033	0.754596	-1.54124	0.124383	0.239052	-5.30607
ENSG00000053770	AP5M1	0.131854	0.691824	1.2135	0.225958	0.363215	-5.70852
ENSG00000053900	ANAPC4	0.0313872	0.370293	0.263706	0.7922	0.867279	-6.33094
ENSG00000053918	KCNQ1	0.044132	0.709779	0.341133	0.733258	0.825993	-6.37313
ENSG00000054116	TRAPPC3	0.05152	1.46641	0.460052	0.645835	0.757398	-6.43399
ENSG00000054118	THRAP3	0.0531584	2.5547	0.637002	0.524642	0.656403	-6.41987
ENSG00000054148	PHPT1	-0.415051	0.479012	-2.15367	0.0321165	0.089385	-4.18165
ENSG00000054267	ARID4B	0.571073	3.36471	4.51371	9.37869e-06	0.000174856	3.05988
ENSG00000054277	OPN3	-0.752464	0.268576	-5.14592	5.007e-07	1.57977e-05	5.93774
ENSG00000054282	SDCCAG8	-0.266163	1.84259	-2.49957	0.0130051	0.0462008	-3.54357
ENSG00000054523	KIF1B	0.385375	2.48512	4.35744	1.84718e-05	0.000299073	2.44154
ENSG00000054611	TBC1D22A	-0.160433	1.38547	-1.87615	0.0616719	0.143999	-4.8209
ENSG00000054654	SYNE2	-0.303463	2.44375	-2.48796	0.0134275	0.0473426	-3.60283
ENSG00000054965	FAM168A	0.404795	1.64822	3.48997	0.000560687	0.00439443	-0.681792
ENSG00000054967	RELT	0.00714279	3.05773	0.0539019	0.957052	0.974373	-6.6364
ENSG00000054983	GALC	0.0763365	3.17756	0.718225	0.473216	0.612669	-6.38549
ENSG00000055044	NOP58	-0.181446	1.10504	-1.46236	0.14476	0.266945	-5.46333
ENSG00000055070	SZRD1	0.196744	2.5972	2.19534	0.0289568	0.0829389	-4.26347
ENSG00000055130	CUL1	0.409403	1.44548	3.16766	0.00170614	0.00988539	-1.67296
ENSG00000055147	FAM114A2	0.153875	0.602943	1.21283	0.226214	0.363509	-5.69373
ENSG00000055163	CYFIP2	-0.0178063	3.28001	-0.138581	0.88988	0.932111	-6.63329
ENSG00000055208	TAB2	0.204598	3.17325	2.19319	0.0291132	0.0831767	-4.28573
ENSG00000055211	GINM1	-0.157812	0.0810137	-1.31898	0.188249	0.319983	-5.48491
ENSG00000055332	EIF2AK2	1.11292	3.15917	6.13597	2.87007e-09	2.01807e-07	10.7811
ENSG00000055483	AC022966.1	-0.202332	2.20985	-1.67934	0.0941971	0.195766	-5.22569
ENSG00000055609	KMT2C	0.0277648	2.8623	0.339287	0.734647	0.826688	-6.57529
ENSG00000055917	PUM2	0.275135	2.30818	3.14366	0.00184714	0.0105166	-1.81766
ENSG00000055950	MRPL43	-0.195025	0.188432	-1.37965	0.168793	0.296238	-5.43475
ENSG00000055955	ITIH4	0.32543	0.502417	1.90098	0.0583274	0.13866	-4.63049
ENSG00000056097	ZFR	-0.072523	1.59772	-0.900367	0.368696	0.51628	-6.15998
ENSG00000056558	TRAF1	0.468177	2.3875	2.44846	0.0149584	0.0509516	-3.67779
ENSG00000056586	RC3H2	-0.0725743	1.61357	-0.665519	0.506265	0.641399	-6.3418
ENSG00000056972	TRAF3IP2	-0.224084	1.20018	-1.85949	0.0640024	0.147969	-4.83587
ENSG00000057019	DCBLD2	-0.372352	-0.329089	-2.06305	0.0400269	0.10541	-4.22497
ENSG00000057149	SERPINB3	0.276478	0.610904	0.954454	0.340675	0.487655	-5.95073
ENSG00000057252	SOAT1	-0.252072	2.0342	-1.77582	0.0768444	0.167915	-5.05255
ENSG00000057608	GDI2	0.196837	3.32823	2.07145	0.0392296	0.103699	-4.54036
ENSG00000057657	PRDM1	0.604657	2.31595	4.29194	2.44041e-05	0.000377133	2.19284
ENSG00000057663	ATG5	0.0558659	0.512177	0.499052	0.618133	0.734271	-6.27619
ENSG00000057704	TMCC3	-0.257452	2.03589	-1.64316	0.101468	0.206071	-5.27377
ENSG00000057757	PITHD1	-0.263229	0.24327	-2.40537	0.0168029	0.0552648	-3.58388
ENSG00000058063	ATP11B	0.337435	3.89654	3.03662	0.0026171	0.0136938	-2.17143
ENSG00000058091	CDK14	0.102017	1.33207	0.804001	0.422076	0.56568	-6.20687
ENSG00000058262	SEC61A1	0.0934803	2.37559	0.918501	0.359144	0.50593	-6.19455
ENSG00000058272	PPP1R12A	0.194553	3.94774	2.03209	0.0430848	0.111319	-4.62589
ENSG00000058453	CROCC	-0.382322	1.47323	-2.71423	0.00705388	0.0288605	-2.97908
ENSG00000058600	POLR3E	-0.197884	0.575657	-1.48877	0.137671	0.257013	-5.34784
ENSG00000058668	ATP2B4	0.0809254	1.75274	0.74542	0.456641	0.598361	-6.29003
ENSG00000058673	ZC3H11A	0.293807	2.52055	2.91658	0.00382442	0.0182489	-2.48347
ENSG00000058799	YIPF1	0.306215	1.42104	2.97607	0.00317377	0.0158511	-2.23754
ENSG00000059122	FLYWCH1	-0.32722	0.492285	-2.37773	0.0180886	0.0583244	-3.69137
ENSG00000059145	UNKL	0.0363177	1.45345	0.272205	0.785665	0.863179	-6.50257
ENSG00000059377	TBXAS1	0.10982	4.00709	0.950987	0.342428	0.489453	-6.20362
ENSG00000059378	PARP12	1.15763	3.4834	5.83953	1.44376e-08	8.26302e-07	9.22899
ENSG00000059728	MXD1	0.44557	6.4013	3.84532	0.000148984	0.00157698	0.480182
ENSG00000059758	CDK17	0.433836	2.31243	3.67326	0.000286672	0.00262024	-0.106683
ENSG00000059804	SLC2A3	0.254749	6.23434	1.89128	0.0596149	0.140883	-4.87114
ENSG00000059915	PSD	-0.162225	0.704633	-1.0461	0.296415	0.441112	-5.91445
ENSG00000060069	CTDP1	-0.170626	2.29538	-1.52859	0.127492	0.243222	-5.46396
ENSG00000060138	YBX3	-0.132092	3.74197	-1.18966	0.235184	0.374196	-5.95165
ENSG00000060237	WNK1	-0.0437468	3.77207	-0.593685	0.553201	0.679779	-6.47466
ENSG00000060339	CCAR1	-0.0724061	1.69152	-0.694948	0.487662	0.625116	-6.33029
ENSG00000060491	OGFR	0.440321	3.13014	3.60326	0.000371579	0.00319182	-0.375337
ENSG00000060558	GNA15	0.145006	2.56741	1.39537	0.164007	0.291108	-5.66187
ENSG00000060642	PIGV	0.242713	-0.1562	1.57862	0.115549	0.226446	-5.04066
ENSG00000060656	PTPRU	-0.564585	-0.435025	-2.87738	0.0043175	0.0200007	-2.31392
ENSG00000060688	SNRNP40	-0.170194	0.135298	-1.19091	0.234695	0.373599	-5.65133
ENSG00000060762	MPC1	-0.257595	0.360028	-1.72697	0.0852721	0.181434	-4.94679
ENSG00000060971	ACAA1	-0.154625	3.06438	-1.58894	0.113198	0.223088	-5.39989
ENSG00000060982	BCAT1	-0.162626	2.04223	-1.33909	0.181625	0.312355	-5.71456
ENSG00000061273	HDAC7	-0.0639115	2.52781	-0.643276	0.52057	0.65279	-6.41653
ENSG00000061936	SFSWAP	0.059143	1.57842	0.647611	0.517765	0.65086	-6.34292
ENSG00000061938	TNK2	0.566182	2.3758	4.16769	4.10104e-05	0.000567801	1.70199
ENSG00000061987	MON2	0.00908162	1.5775	0.0939629	0.925206	0.953389	-6.54795
ENSG00000062038	CDH3	-0.350389	-0.564428	-2.02983	0.0433155	0.111798	-4.23759
ENSG00000062194	GPBP1	0.410947	3.17591	3.80873	0.000171576	0.00173944	0.338785
ENSG00000062282	DGAT2	0.179953	3.64213	1.047	0.295999	0.441019	-6.10624
ENSG00000062485	CS	-0.241496	2.25999	-2.90798	0.00392805	0.0186271	-2.50531
ENSG00000062582	MRPS24	-0.139516	1.0794	-1.00087	0.317752	0.464019	-6.01539
ENSG00000062598	ELMO2	0.480302	2.36968	3.93696	0.000104119	0.00117973	0.831519
ENSG00000062650	WAPL	0.229897	1.39386	2.49333	0.0132306	0.0467153	-3.50078
ENSG00000062716	VMP1	0.124085	5.47822	1.25135	0.211848	0.346705	-5.867
ENSG00000062725	APPBP2	0.16869	0.680711	1.58466	0.11417	0.22446	-5.20559
ENSG00000062822	POLD1	0.111288	-0.042311	0.78515	0.433027	0.575732	-5.9917
ENSG00000063015	SEZ6	0.0070696	-0.162989	0.0394866	0.96853	0.981594	-6.27774
ENSG00000063046	EIF4B	-0.220989	2.99418	-2.57558	0.0105185	0.0390734	-3.40449
ENSG00000063169	BICRA	0.049032	0.208557	0.411343	0.681135	0.785875	-6.25829
ENSG00000063177	RPL18	-0.115377	4.35094	-0.995248	0.320472	0.466744	-6.16101
ENSG00000063241	ISOC2	-0.398619	0.286334	-2.50537	0.0127985	0.0457308	-3.36354
ENSG00000063244	U2AF2	-0.0950489	2.91482	-0.87196	0.383975	0.530797	-6.2601
ENSG00000063245	EPN1	-0.0536454	2.21214	-0.52407	0.600643	0.72045	-6.46874
ENSG00000063322	MED29	0.0540572	1.56942	0.564884	0.572603	0.696046	-6.39319
ENSG00000063601	MTMR1	0.0919691	0.732191	0.810996	0.418054	0.56251	-6.11558
ENSG00000063854	HAGH	-0.535991	0.952352	-4.54086	8.321e-06	0.000158917	3.25335
ENSG00000063978	RNF4	-0.244993	1.91616	-2.46841	0.0141669	0.049088	-3.62014
ENSG00000064012	CASP8	0.245485	2.63091	2.29444	0.0225029	0.0689016	-4.04707
ENSG00000064115	TM7SF3	-0.14509	1.45966	-1.04534	0.296767	0.441562	-6.0124
ENSG00000064225	ST3GAL6	0.384615	2.30282	2.86538	0.00447968	0.0205393	-2.61256
ENSG00000064270	ATP2C2	-0.894132	0.722215	-4.49133	1.03467e-05	0.000188966	3.05665
ENSG00000064313	TAF2	-0.0190843	1.08171	-0.185293	0.853133	0.90782	-6.47646
ENSG00000064393	HIPK2	-0.0645785	1.54728	-0.599931	0.549036	0.676688	-6.37429
ENSG00000064419	TNPO3	0.331628	0.994447	3.45269	0.000640497	0.00486877	-0.745526
ENSG00000064490	RFXANK	0.290531	1.26444	2.21997	0.0272188	0.0792726	-4.10597
ENSG00000064547	LPAR2	0.460141	3.10633	3.04881	0.00251645	0.0133182	-2.12314
ENSG00000064601	CTSA	0.281822	4.05495	2.34556	0.0196941	0.0622171	-3.96042
ENSG00000064607	SUGP2	0.00925711	0.717782	0.0916468	0.927044	0.954584	-6.43102
ENSG00000064666	CNN2	0.275241	5.24694	3.21355	0.00146378	0.00891672	-1.63956
ENSG00000064687	ABCA7	0.000255996	2.23531	0.00219603	0.998249	0.999571	-6.60441
ENSG00000064726	BTBD1	-0.366361	1.73958	-2.56441	0.0108551	0.0401269	-3.3798
ENSG00000064763	FAR2	0.36999	2.01976	3.18246	0.00162417	0.0095282	-1.68204
ENSG00000064886	CHI3L2	0.0389117	-0.00622531	0.256504	0.79775	0.870916	-6.26796
ENSG00000064932	SBNO2	0.287595	5.20358	3.04796	0.00252341	0.0133382	-2.13419
ENSG00000064961	HMG20B	-0.206046	0.998548	-1.82176	0.0695551	0.15661	-4.8736
ENSG00000064995	TAF11	-0.0682394	0.129922	-0.772791	0.440296	0.582464	-6.04536
ENSG00000064999	ANKS1A	-0.0488813	0.907058	-0.586201	0.558211	0.683631	-6.30339
ENSG00000065000	AP3D1	-0.0363111	2.81747	-0.51014	0.610354	0.727902	-6.50307
ENSG00000065029	ZNF76	-0.277263	0.313455	-2.61283	0.00946309	0.036346	-3.1016
ENSG00000065054	SLC9A3R2	-0.435339	0.115709	-2.21672	0.0274431	0.0797148	-3.98767
ENSG00000065135	GNAI3	0.314867	1.47276	3.23878	0.00134453	0.00836636	-1.46708
ENSG00000065150	IPO5	-0.503599	0.744269	-4.02416	7.35807e-05	0.000911382	1.23706
ENSG00000065154	OAT	-0.154283	1.28798	-1.33311	0.183575	0.314608	-5.65635
ENSG00000065243	PKN2	0.201176	1.52454	1.73272	0.0842432	0.179772	-5.06916
ENSG00000065268	WDR18	-0.136512	-0.0466788	-0.856516	0.392442	0.539478	-5.9579
ENSG00000065357	DGKA	0.257718	3.31401	1.97816	0.0488871	0.122454	-4.72316
ENSG00000065361	ERBB3	-0.521978	1.3255	-2.38565	0.0177119	0.0573539	-3.77949
ENSG00000065413	ANKRD44	0.380339	3.21323	2.93121	0.00365402	0.0176584	-2.46266
ENSG00000065427	KARS1	0.442933	2.08495	3.4464	0.000654978	0.00494827	-0.853535
ENSG00000065457	ADAT1	-0.0656085	2.06246	-0.488202	0.625787	0.740326	-6.47894
ENSG00000065518	NDUFB4	-0.0319378	1.97607	-0.225132	0.82204	0.887201	-6.56144
ENSG00000065526	SPEN	0.0214596	1.59214	0.246646	0.805362	0.875985	-6.5215
ENSG00000065548	ZC3H15	0.104064	1.73189	1.057	0.291417	0.436505	-6.01144
ENSG00000065559	MAP2K4	0.0876616	1.28006	0.734554	0.463224	0.60381	-6.24755
ENSG00000065600	PACC1	-0.225884	-0.207247	-1.574	0.116613	0.227855	-5.08211
ENSG00000065613	SLK	0.268806	2.21499	2.44876	0.0149462	0.0509516	-3.67234
ENSG00000065615	CYB5R4	0.270494	3.01104	2.48214	0.013644	0.0478486	-3.62764
ENSG00000065621	GSTO2	-0.0392239	0.53628	-0.284307	0.776384	0.85646	-6.37394
ENSG00000065665	SEC61A2	-0.0774771	-0.158356	-0.432626	0.665618	0.773869	-6.17414
ENSG00000065717	TLE2	-0.645439	-0.74969	-3.31966	0.0010203	0.00691726	-0.999267
ENSG00000065802	ASB1	0.0216024	0.199595	0.160811	0.872357	0.921305	-6.33409
ENSG00000065809	FAM107B	-0.131516	4.17239	-1.30577	0.192699	0.325319	-5.8105
ENSG00000065882	TBC1D1	-0.0767873	2.90575	-0.938051	0.349024	0.495785	-6.20115
ENSG00000065883	CDK13	-0.0185972	1.93583	-0.252256	0.801028	0.873332	-6.55302
ENSG00000065911	MTHFD2	0.624911	2.83561	5.27714	2.62702e-07	9.203e-06	6.46115
ENSG00000065923	SLC9A7	-0.0445494	-0.429538	-0.283132	0.777284	0.857129	-6.17234
ENSG00000065970	FOXJ2	-0.181773	0.0236159	-1.90055	0.0583841	0.138724	-4.58159
ENSG00000065978	YBX1	-0.358898	4.25367	-2.63268	0.00894029	0.0347859	-3.27029
ENSG00000065989	PDE4A	0.089432	1.44889	0.827215	0.408817	0.554327	-6.19853
ENSG00000066027	PPP2R5A	0.13973	1.56941	1.33023	0.18452	0.315356	-5.67743
ENSG00000066044	ELAVL1	-0.372514	0.654827	-3.40004	0.000771462	0.00559637	-0.910871
ENSG00000066084	DIP2B	0.466307	2.20983	4.70427	4.00136e-06	8.71447e-05	3.89476
ENSG00000066117	SMARCD1	-0.116939	0.95915	-1.13677	0.256603	0.398801	-5.85091
ENSG00000066135	KDM4A	-0.153561	0.237262	-1.42418	0.155505	0.280365	-5.37348
ENSG00000066136	NFYC	0.243442	2.5868	3.04636	0.0025364	0.0133878	-2.1169
ENSG00000066294	CD84	0.423698	1.29188	2.42147	0.0160911	0.0536589	-3.64816
ENSG00000066322	ELOVL1	0.182452	2.04824	1.89166	0.059564	0.140814	-4.83484
ENSG00000066336	SPI1	0.285069	6.28399	3.24844	0.0013013	0.00820629	-1.51693
ENSG00000066379	ZNRD1	-0.00115202	-0.013505	-0.00800417	0.993619	0.997063	-6.3062
ENSG00000066422	ZBTB11	0.160818	0.139923	1.67151	0.0957353	0.19787	-4.96765
ENSG00000066427	ATXN3	-0.0848964	1.41289	-0.690651	0.490355	0.627037	-6.30703
ENSG00000066455	GOLGA5	0.200202	0.42671	1.74799	0.0815589	0.175682	-4.88662
ENSG00000066629	EML1	-0.47687	-0.235023	-2.74835	0.00637746	0.0267603	-2.68312
ENSG00000066654	THUMPD1	-0.0935949	0.394353	-0.900995	0.368363	0.515886	-5.99411
ENSG00000066739	ATG2B	-0.0260892	0.00340856	-0.186945	0.851838	0.906945	-6.28684
ENSG00000066777	ARFGEF1	0.205995	1.91631	2.37558	0.0181923	0.0585627	-3.82611
ENSG00000066827	ZFAT	-0.143352	0.193366	-1.10547	0.269901	0.413719	-5.76263
ENSG00000066855	MTFR1	-0.346052	0.960221	-2.40201	0.0169546	0.0555855	-3.69565
ENSG00000066923	STAG3	-0.214534	1.21263	-1.71116	0.0881555	0.186035	-5.09277
ENSG00000066933	MYO9A	-0.346365	0.498566	-2.47933	0.0137498	0.0480828	-3.45676
ENSG00000067048	DDX3Y	0.133202	1.11367	0.877923	0.380735	0.527956	-6.05566
ENSG00000067057	PFKP	-0.207447	1.82744	-1.6293	0.104369	0.210043	-5.28207
ENSG00000067064	IDI1	0.549581	2.65178	4.0706	6.1009e-05	0.000781996	1.32032
ENSG00000067066	SP100	0.746515	5.03203	7.25529	3.92019e-12	1.27108e-09	17.1278
ENSG00000067082	KLF6	0.237495	5.80545	2.50049	0.0129722	0.0461472	-3.58314
ENSG00000067167	TRAM1	0.0075283	2.33772	0.0660889	0.947354	0.967811	-6.60698
ENSG00000067182	TNFRSF1A	0.364226	5.19605	4.05256	6.56283e-05	0.000829326	1.22865
ENSG00000067208	EVI5	-0.567016	1.05132	-3.92243	0.000110257	0.00123564	0.833129
ENSG00000067225	PKM	-0.0303554	5.59541	-0.336479	0.736761	0.82812	-6.57783
ENSG00000067334	DNTTIP2	0.126876	2.61966	1.09957	0.272459	0.416991	-6.02642
ENSG00000067365	METTL22	-0.0145495	2.12323	-0.11212	0.910809	0.944784	-6.59085
ENSG00000067369	TP53BP1	-0.31609	1.35822	-2.93661	0.00359287	0.0174399	-2.36987
ENSG00000067560	RHOA	0.0103639	5.87214	0.128941	0.897496	0.937414	-6.62029
ENSG00000067596	DHX8	0.0814796	1.71264	0.842346	0.400311	0.546555	-6.21556
ENSG00000067606	PRKCZ	-0.822287	0.106897	-4.96653	1.18508e-06	3.19613e-05	5.13451
ENSG00000067704	IARS2	-0.367259	-0.0977188	-2.8485	0.00471721	0.021262	-2.42331
ENSG00000067798	NAV3	-0.447328	-0.3111	-1.98652	0.0479466	0.120774	-4.37393
ENSG00000067829	IDH3G	0.123554	1.55705	1.08671	0.278098	0.42273	-5.96361
ENSG00000067836	ROGDI	0.0808635	0.451067	0.590566	0.555286	0.681405	-6.21725
ENSG00000067900	ROCK1	-0.0380181	2.8948	-0.434687	0.664123	0.772404	-6.54026
ENSG00000067955	CBFB	0.114219	2.31308	1.10925	0.268273	0.412186	-6.00109
ENSG00000068024	HDAC4	0.249793	3.60133	2.3272	0.0206654	0.0644786	-3.99867
ENSG00000068028	RASSF1	-0.157402	-0.153674	-1.31288	0.190295	0.32238	-5.45272
ENSG00000068079	IFI35	1.17495	3.04628	6.2012	1.99592e-09	1.53279e-07	11.1323
ENSG00000068097	HEATR6	-0.0197649	0.806229	-0.160472	0.872625	0.921369	-6.44358
ENSG00000068120	COASY	-0.0120233	1.16871	-0.118567	0.905703	0.941858	-6.49605
ENSG00000068305	MEF2A	0.382459	2.6241	3.75054	0.00021429	0.00207575	0.148446
ENSG00000068308	OTUD5	0.342273	2.35383	3.64711	0.000315992	0.00282528	-0.20171
ENSG00000068323	TFE3	0.19424	3.33669	2.00333	0.0461022	0.117173	-4.67592
ENSG00000068366	ACSL4	0.116193	3.18258	1.08865	0.277243	0.421756	-6.05569
ENSG00000068383	INPP5A	-0.218836	1.64362	-1.54993	0.122285	0.23608	-5.39135
ENSG00000068400	GRIPAP1	0.326303	3.18401	3.27195	0.00120145	0.00777076	-1.45499
ENSG00000068438	FTSJ1	-0.279194	0.0570747	-1.98952	0.0476135	0.120212	-4.42944
ENSG00000068650	ATP11A	0.00723458	3.51764	0.0764996	0.939076	0.963045	-6.64294
ENSG00000068654	POLR1A	-0.364102	-0.117237	-2.38456	0.0177632	0.0574821	-3.57676
ENSG00000068697	LAPTM4A	0.254996	3.05232	2.28952	0.0227907	0.0696527	-4.07236
ENSG00000068724	TTC7A	0.0259765	1.54486	0.248086	0.804249	0.875213	-6.51493
ENSG00000068745	IP6K2	0.0745534	2.20578	0.876737	0.381378	0.52855	-6.22255
ENSG00000068784	SRBD1	0.403198	0.881748	2.66737	0.00808848	0.0321367	-2.99569
ENSG00000068796	KIF2A	-0.137021	0.801978	-1.09579	0.274108	0.418539	-5.87639
ENSG00000068831	RASGRP2	0.343611	2.4049	2.71786	0.00697882	0.0286766	-3.01276
ENSG00000068878	PSME4	-0.445949	1.22285	-4.25084	2.9014e-05	0.000433606	2.06762
ENSG00000068885	IFT80	-0.445858	0.601054	-3.17075	0.00168869	0.00981895	-1.61417
ENSG00000068903	SIRT2	-0.055282	1.89301	-0.594514	0.552647	0.679437	-6.41001
ENSG00000068912	ERLEC1	-0.0345751	0.67934	-0.284265	0.776417	0.85646	-6.39423
ENSG00000068971	PPP2R5B	-0.376413	0.193712	-2.96858	0.0032497	0.0161566	-2.14509
ENSG00000068976	PYGM	-0.0118535	-0.157379	-0.0631092	0.949724	0.969521	-6.27498
ENSG00000069011	PITX1	-0.32471	-0.430236	-1.73534	0.0837763	0.179048	-4.79282
ENSG00000069020	MAST4	-0.172187	0.38572	-1.03932	0.299551	0.444228	-5.86851
ENSG00000069248	NUP133	-0.14493	0.670892	-1.19747	0.232132	0.370598	-5.74337
ENSG00000069275	NUCKS1	-0.40184	0.418736	-2.5232	0.0121811	0.0440202	-3.33768
ENSG00000069329	VPS35	0.23712	2.38654	2.72237	0.00688679	0.0283536	-3.00143
ENSG00000069345	DNAJA2	0.0512752	1.8329	0.749312	0.454296	0.596517	-6.29819
ENSG00000069399	BCL3	0.246742	5.4853	2.24715	0.0254065	0.0752638	-4.16924
ENSG00000069424	KCNAB2	-0.228561	3.30973	-1.95535	0.051533	0.127268	-4.77104
ENSG00000069493	CLEC2D	0.388728	1.22321	2.6208	0.00924992	0.0356943	-3.16309
ENSG00000069667	RORA	-0.596935	0.0869831	-3.95118	9.84295e-05	0.00112667	1.03293
ENSG00000069849	ATP1B3	0.0809105	3.35722	0.658115	0.511003	0.645473	-6.42906
ENSG00000069869	NEDD4	-0.569638	3.43392	-2.57866	0.0104277	0.0388711	-3.40459
ENSG00000069943	PIGB	0.0966033	1.64961	0.731264	0.465227	0.60578	-6.29412
ENSG00000069956	MAPK6	-0.199121	2.52948	-1.98444	0.0481791	0.1211	-4.69595
ENSG00000069974	RAB27A	0.412789	3.18664	3.39613	0.000782102	0.00564569	-1.0614
ENSG00000070010	UFD1	-0.0743557	1.73821	-0.79187	0.429104	0.572139	-6.2637
ENSG00000070047	PHRF1	0.297281	0.923343	2.90943	0.00391038	0.0185602	-2.3693
ENSG00000070081	NUCB2	-0.291037	2.24554	-2.11488	0.0353206	0.0960753	-4.42516
ENSG00000070087	PFN2	-0.349606	0.466363	-2.15337	0.0321405	0.0893937	-4.16955
ENSG00000070190	DAPP1	0.920234	2.47035	5.68167	3.33206e-08	1.63188e-06	8.44463
ENSG00000070214	SLC44A1	-0.0452677	0.225311	-0.356798	0.721511	0.816291	-6.28646
ENSG00000070269	TMEM260	0.276399	1.43128	2.52974	0.0119617	0.0434034	-3.41504
ENSG00000070366	SMG6	-0.207494	1.15538	-1.61652	0.107104	0.213991	-5.24111
ENSG00000070367	EXOC5	-0.094082	1.46192	-0.953084	0.341367	0.488361	-6.09756
ENSG00000070413	DGCR2	0.433806	1.57726	3.79072	0.000183849	0.00183931	0.352583
ENSG00000070423	RNF126	-0.158848	0.313702	-1.36718	0.172662	0.301309	-5.47006
ENSG00000070444	MNT	-0.168381	2.24631	-1.4259	0.155008	0.279674	-5.60986
ENSG00000070476	ZXDC	0.00781904	0.863378	0.0968329	0.922928	0.952138	-6.45637
ENSG00000070495	JMJD6	0.174467	2.96126	1.58906	0.113172	0.22308	-5.39321
ENSG00000070501	POLB	0.0148299	1.6739	0.113985	0.909331	0.943649	-6.55615
ENSG00000070526	ST6GALNAC1	-0.317643	0.25936	-1.7554	0.0802813	0.173537	-4.88319
ENSG00000070540	WIPI1	-0.00367522	2.04851	-0.0344385	0.972552	0.983227	-6.59032
ENSG00000070610	GBA2	0.0265839	1.90559	0.304634	0.76087	0.845391	-6.53551
ENSG00000070614	NDST1	-0.188453	1.87605	-1.62546	0.105186	0.2111	-5.28958
ENSG00000070669	ASNS	0.115713	-0.279136	0.748515	0.454776	0.596909	-5.96324
ENSG00000070729	CNGB1	-0.200398	0.276746	-0.966464	0.334643	0.481895	-5.93444
ENSG00000070731	ST6GALNAC2	-0.125581	1.38101	-0.980615	0.327627	0.474427	-6.06016
ENSG00000070756	PABPC1	-0.175495	5.07802	-2.11665	0.0351686	0.0959269	-4.44852
ENSG00000070761	CFAP20	-0.273542	-0.133512	-1.64028	0.102066	0.20695	-4.98813
ENSG00000070770	CSNK2A2	-0.127527	0.968918	-1.243	0.214903	0.350209	-5.72957
ENSG00000070814	TCOF1	0.278183	0.495637	2.23238	0.0263783	0.0774148	-3.97089
ENSG00000070831	CDC42	0.0326014	4.75046	0.507769	0.612014	0.729378	-6.51937
ENSG00000070882	OSBPL3	-0.0747061	1.27896	-0.616129	0.538308	0.668151	-6.33249
ENSG00000070961	ATP2B1	-0.246016	3.92771	-1.64376	0.101345	0.205912	-5.32219
ENSG00000071051	NCK2	0.0238663	1.00723	0.221781	0.824646	0.888649	-6.45575
ENSG00000071054	MAP4K4	-0.109289	4.42467	-0.915814	0.36055	0.507398	-6.23498
ENSG00000071073	MGAT4A	0.504332	1.52525	3.70192	0.000257496	0.00241639	0.0480939
ENSG00000071082	RPL31	-0.289605	4.54208	-2.17159	0.0307236	0.0865855	-4.33943
ENSG00000071127	WDR1	-0.133872	5.35198	-2.10575	0.0361134	0.0973974	-4.46712
ENSG00000071189	SNX13	0.156147	1.93016	1.81301	0.0708975	0.158718	-4.97044
ENSG00000071205	ARHGAP10	-0.398973	-0.141474	-3.07812	0.00228896	0.0123601	-1.78543
ENSG00000071243	ING3	0.303011	0.436485	2.46517	0.0142928	0.049437	-3.42787
ENSG00000071246	VASH1	0.227414	0.595754	1.45084	0.14794	0.271196	-5.37182
ENSG00000071462	BUD23	-0.340907	1.26362	-2.84528	0.00476371	0.0214323	-2.61233
ENSG00000071537	SEL1L	0.00885923	2.42314	0.0830318	0.933885	0.95902	-6.60989
ENSG00000071553	ATP6AP1	0.0775708	3.82002	0.682049	0.49577	0.631762	-6.41912
ENSG00000071564	TCF3	-0.00312519	1.33782	-0.0229451	0.98171	0.988741	-6.52705
ENSG00000071575	TRIB2	0.330891	0.0175364	1.7492	0.0813489	0.175345	-4.81224
ENSG00000071626	DAZAP1	-0.00684809	1.98578	-0.0618085	0.950759	0.970313	-6.58444
ENSG00000071655	MBD3	-0.384666	0.615406	-2.8975	0.00405769	0.0190754	-2.39903
ENSG00000071859	FAM50A	-0.0671335	2.80469	-0.611735	0.541208	0.669808	-6.4479
ENSG00000071889	FAM3A	-0.182403	0.363185	-1.49419	0.136249	0.255084	-5.31221
ENSG00000071894	CPSF1	-0.0828821	1.24625	-0.745029	0.456877	0.598469	-6.2487
ENSG00000071994	PDCD2	-0.184743	0.298347	-1.44596	0.149304	0.272731	-5.36216
ENSG00000072042	RDH11	-0.0469625	0.366055	-0.372662	0.709681	0.806988	-6.30506
ENSG00000072062	PRKACA	0.00956251	2.50013	0.105478	0.916072	0.948045	-6.61116
ENSG00000072071	ADGRL1	-0.23422	-0.00115456	-1.73951	0.0830411	0.177824	-4.86533
ENSG00000072080	SPP2	-0.535492	-0.373501	-2.03589	0.0426989	0.110525	-4.27715
ENSG00000072110	ACTN1	-0.00412035	4.86637	-0.0485077	0.961346	0.97733	-6.64413
ENSG00000072121	ZFYVE26	0.227183	1.80151	2.06231	0.0400971	0.105511	-4.4903
ENSG00000072134	EPN2	-0.600345	0.693101	-3.53696	0.000473339	0.00386044	-0.473407
ENSG00000072135	PTPN18	-0.0115834	2.04835	-0.114369	0.909027	0.943632	-6.58692
ENSG00000072210	ALDH3A2	-0.610637	1.0107	-4.86637	1.89752e-06	4.62355e-05	4.63961
ENSG00000072274	TFRC	-0.620042	3.86046	-4.51577	9.2939e-06	0.000173604	3.06106
ENSG00000072310	SREBF1	0.207604	2.80615	2.35734	0.0190923	0.0608628	-3.91381
ENSG00000072364	AFF4	-0.046007	2.92116	-0.62413	0.533049	0.663799	-6.44327
ENSG00000072401	UBE2D1	0.440181	3.01005	4.10106	5.39046e-05	0.000706574	1.42228
ENSG00000072415	MPP5	0.00797936	0.125043	0.0661496	0.947306	0.967811	-6.32801
ENSG00000072501	SMC1A	0.232004	1.14833	1.87671	0.0615941	0.143885	-4.77062
ENSG00000072506	HSD17B10	-0.089566	0.338054	-0.600013	0.548981	0.676688	-6.20519
ENSG00000072518	MARK2	0.143327	3.10191	2.04806	0.0414834	0.108377	-4.58356
ENSG00000072609	CHFR	0.13064	2.99017	1.60575	0.109453	0.217536	-5.36768
ENSG00000072682	P4HA2	-0.826527	1.01145	-4.88314	1.75465e-06	4.31819e-05	4.70769
ENSG00000072694	FCGR2B	0.871241	2.22258	5.42771	1.23456e-07	4.8292e-06	7.20285
ENSG00000072736	NFATC3	0.270396	0.798456	2.94947	0.00345106	0.0168932	-2.24446
ENSG00000072756	TRNT1	0.13987	0.698294	1.04048	0.299012	0.443775	-5.89877
ENSG00000072778	ACADVL	-0.281188	3.94174	-2.78113	0.00578338	0.0248936	-2.88462
ENSG00000072786	STK10	-0.0721668	4.79895	-0.692676	0.489085	0.626079	-6.40882
ENSG00000072803	FBXW11	0.000833067	1.77539	0.00775362	0.993819	0.997117	-6.57098
ENSG00000072818	ACAP1	0.285419	3.26025	2.43119	0.0156749	0.0526275	-3.75294
ENSG00000072849	DERL2	0.0708899	1.58431	0.633055	0.527213	0.658875	-6.35037
ENSG00000072858	SIDT1	-0.336331	-0.20676	-1.93538	0.0539469	0.131282	-4.48607
ENSG00000072864	NDE1	0.00107355	2.37635	0.0122798	0.990211	0.994675	-6.61154
ENSG00000072952	MRVI1	0.0340185	0.716494	0.219484	0.826433	0.889893	-6.40852
ENSG00000072958	AP1M1	-0.0214971	2.17931	-0.206316	0.836694	0.896139	-6.57926
ENSG00000073008	PVR	-0.585732	-0.033532	-4.71815	3.75665e-06	8.21788e-05	4.0685
ENSG00000073050	XRCC1	0.159591	0.320081	1.27908	0.201925	0.335939	-5.56437
ENSG00000073060	SCARB1	-0.665459	0.0763545	-4.99554	1.03259e-06	2.84906e-05	5.27015
ENSG00000073169	SELENOO	0.16039	0.237471	1.3531	0.177112	0.307007	-5.44972
ENSG00000073331	ALPK1	0.104403	3.38552	0.785903	0.432587	0.57538	-6.33903
ENSG00000073350	LLGL2	-0.60503	0.76263	-3.38679	0.000808144	0.00576894	-0.972275
ENSG00000073417	PDE8A	-0.548096	1.07642	-4.31994	2.16733e-05	0.000339733	2.34682
ENSG00000073578	SDHA	-0.0818491	1.89185	-0.856697	0.392343	0.539416	-6.22164
ENSG00000073584	SMARCE1	0.0997874	1.60614	1.04895	0.295103	0.440017	-6.00866
ENSG00000073614	KDM5A	0.0276028	2.75959	0.321017	0.748436	0.837323	-6.57744
ENSG00000073737	DHRS9	0.244677	1.31927	1.32057	0.18772	0.319322	-5.65466
ENSG00000073756	PTGS2	-0.354841	5.12619	-1.38722	0.166475	0.293794	-5.693
ENSG00000073792	IGF2BP2	-0.396769	0.962328	-2.41152	0.0165276	0.0547056	-3.67354
ENSG00000073803	MAP3K13	-0.223127	1.33753	-1.85734	0.0643091	0.148466	-4.85272
ENSG00000073849	ST6GAL1	-0.0363045	1.41286	-0.285209	0.775694	0.856238	-6.49824
ENSG00000073910	FRY	-0.335876	0.535518	-2.7619	0.00612546	0.0260022	-2.75374
ENSG00000073921	PICALM	0.214994	5.58177	2.59483	0.00996061	0.0376149	-3.35407
ENSG00000073969	NSF	0.11115	1.58554	1.06038	0.289883	0.435201	-5.99626
ENSG00000074054	CLASP1	0.143792	1.80085	1.40973	0.159726	0.285777	-5.59135
ENSG00000074071	MRPS34	-0.238286	-0.0187053	-1.42035	0.156615	0.281799	-5.34331
ENSG00000074201	CLNS1A	-0.131566	1.53498	-1.0758	0.28294	0.427581	-5.98644
ENSG00000074319	TSG101	0.165055	2.37577	1.79148	0.0742923	0.164123	-5.03604
ENSG00000074356	NCBP3	-0.217467	0.944537	-2.0105	0.0453341	0.115554	-4.51775
ENSG00000074370	ATP2A3	0.198436	2.77853	1.54509	0.123451	0.237864	-5.45424
ENSG00000074416	MGLL	-0.295998	2.37006	-1.69275	0.091612	0.19156	-5.21392
ENSG00000074603	DPP8	0.223162	1.20019	2.22919	0.026592	0.0778388	-4.08126
ENSG00000074621	SLC24A1	0.0968913	0.314797	0.677538	0.498622	0.634165	-6.13958
ENSG00000074657	ZNF532	-0.625648	0.420312	-3.60706	0.00036643	0.00316693	-0.212393
ENSG00000074660	SCARF1	0.445481	2.86853	2.42086	0.0161178	0.0537115	-3.76538
ENSG00000074695	LMAN1	-0.391527	0.33699	-2.9695	0.00324025	0.0161177	-2.16065
ENSG00000074696	HACD3	-0.60262	0.263765	-4.62208	5.7975e-06	0.000118844	3.6424
ENSG00000074706	IPCEF1	0.269987	1.11354	1.88257	0.0607923	0.142792	-4.7606
ENSG00000074755	ZZEF1	0.0673462	2.01675	0.981035	0.32742	0.474267	-6.11364
ENSG00000074800	ENO1	-0.0471597	5.11823	-0.485403	0.627769	0.74207	-6.52533
ENSG00000074842	MYDGF	-0.215132	1.90279	-1.55199	0.121789	0.235354	-5.40821
ENSG00000074935	TUBE1	-0.350449	0.491014	-2.16217	0.0314492	0.0879505	-4.16759
ENSG00000074964	ARHGEF10L	0.0542205	1.81945	0.410061	0.682073	0.786603	-6.48877
ENSG00000075089	ACTR6	-0.389626	0.468742	-2.60978	0.00954571	0.0365634	-3.13671
ENSG00000075142	SRI	-0.0643181	2.15762	-0.476606	0.634013	0.747363	-6.4892
ENSG00000075151	EIF4G3	0.431797	2.89359	4.28474	2.51578e-05	0.000385752	2.13915
ENSG00000075223	SEMA3C	-0.907091	0.988578	-6.30524	1.112e-09	9.68723e-08	11.7139
ENSG00000075234	TTC38	0.186923	1.00744	1.15352	0.249678	0.390815	-5.81854
ENSG00000075239	ACAT1	-0.58305	1.33889	-4.68817	4.30463e-06	9.27238e-05	3.84645
ENSG00000075240	GRAMD4	0.0410516	1.40985	0.262596	0.793054	0.867522	-6.49617
ENSG00000075275	CELSR1	-0.6135	-0.393866	-3.57928	0.000405744	0.00344917	-0.204448
ENSG00000075292	ZNF638	0.183541	3.69646	1.91094	0.0570293	0.136421	-4.85667
ENSG00000075303	SLC25A40	0.426854	0.964104	2.90614	0.0039505	0.0187145	-2.38107
ENSG00000075399	VPS9D1	0.305834	3.61178	2.18292	0.0298693	0.0850052	-4.31364
ENSG00000075407	ZNF37A	-0.049567	-0.0193309	-0.394445	0.693552	0.794984	-6.23185
ENSG00000075413	MARK3	0.0786676	3.4787	1.07432	0.283601	0.428252	-6.07673
ENSG00000075415	SLC25A3	-0.164719	3.26865	-1.73563	0.0837249	0.178977	-5.16494
ENSG00000075420	FNDC3B	0.142292	5.34001	1.63303	0.103582	0.208986	-5.32973
ENSG00000075426	FOSL2	0.0288088	5.45064	0.278861	0.780557	0.859578	-6.59858
ENSG00000075539	FRYL	0.133578	2.21789	1.47405	0.141589	0.262635	-5.53344
ENSG00000075568	TMEM131	0.322202	1.4571	3.26855	0.00121544	0.00783546	-1.37323
ENSG00000075624	ACTB	0.410763	10.0733	3.99172	8.37838e-05	0.00100459	1.0692
ENSG00000075651	PLD1	-0.151225	2.36713	-0.991829	0.322134	0.468542	-6.13211
ENSG00000075711	DLG1	-0.188207	1.12939	-1.76749	0.0782323	0.170305	-4.9832
ENSG00000075785	RAB7A	0.15659	5.02648	2.16864	0.0309492	0.0869971	-4.34287
ENSG00000075790	BCAP29	-0.176429	0.546966	-1.24456	0.21433	0.349663	-5.65826
ENSG00000075856	SART3	-0.114022	1.38029	-1.14801	0.251941	0.393418	-5.88986
ENSG00000075884	ARHGAP15	0.230394	3.69681	1.58449	0.114207	0.22446	-5.41327
ENSG00000075914	EXOSC7	-0.438848	-0.308352	-2.86427	0.00449501	0.0205809	-2.35576
ENSG00000076043	REXO2	-0.58902	-0.135014	-3.87188	0.000134383	0.0014553	0.769349
ENSG00000076053	RBM7	0.438522	1.74541	4.02305	7.39093e-05	0.000912046	1.18602
ENSG00000076067	RBMS2	-0.317147	0.394799	-1.85649	0.0644305	0.148537	-4.72854
ENSG00000076108	BAZ2A	0.215488	3.67985	2.53123	0.011912	0.0432651	-3.52089
ENSG00000076201	PTPN23	-0.0821827	1.1994	-0.751767	0.452821	0.595215	-6.24206
ENSG00000076242	MLH1	0.0298446	1.30735	0.294909	0.768281	0.851301	-6.48036
ENSG00000076382	SPAG5	-0.247675	0.131647	-1.63715	0.102718	0.2078	-5.05285
ENSG00000076513	ANKRD13A	0.255854	2.99192	2.89757	0.00405679	0.0190754	-2.55291
ENSG00000076554	TPD52	-0.471576	0.0788735	-2.49713	0.0130928	0.0463896	-3.35426
ENSG00000076555	ACACB	-0.398817	1.16967	-2.58013	0.0103845	0.0387655	-3.2956
ENSG00000076604	TRAF4	-0.267218	1.04383	-1.62394	0.10551	0.211407	-5.21356
ENSG00000076641	PAG1	0.335282	3.58005	2.59201	0.0100408	0.037827	-3.36894
ENSG00000076662	ICAM3	0.731464	3.67579	4.87358	1.83474e-06	4.49283e-05	4.60072
ENSG00000076685	NT5C2	0.49283	4.23313	4.89089	1.6921e-06	4.20632e-05	4.67321
ENSG00000076924	XAB2	0.272562	0.764015	2.92144	0.00376705	0.0180364	-2.31704
ENSG00000076928	ARHGEF1	0.3011	4.25276	3.14161	0.00185969	0.0105636	-1.86333
ENSG00000076944	STXBP2	0.526252	6.56082	4.64112	5.3228e-06	0.000110544	3.60563
ENSG00000076984	MAP2K7	-0.292253	0.614144	-2.64924	0.0085241	0.0334975	-3.0526
ENSG00000077044	DGKD	-0.0728902	2.70239	-0.565368	0.572275	0.696006	-6.47042
ENSG00000077097	TOP2B	0.0542197	1.18188	0.566041	0.571818	0.695651	-6.34764
ENSG00000077147	TM9SF3	0.118955	2.20163	1.25702	0.20979	0.344137	-5.82244
ENSG00000077150	NFKB2	0.119235	5.03217	0.993041	0.321544	0.46796	-6.15807
ENSG00000077157	PPP1R12B	-0.365111	0.510778	-2.43957	0.0153233	0.0518005	-3.54782
ENSG00000077232	DNAJC10	-0.171853	0.736427	-1.29609	0.196008	0.329527	-5.63673
ENSG00000077235	GTF3C1	-0.148734	0.961168	-1.33112	0.184229	0.315224	-5.62052
ENSG00000077238	IL4R	0.0385623	5.65206	0.331483	0.740527	0.831119	-6.57959
ENSG00000077254	USP33	-0.0483157	2.32304	-0.466788	0.641014	0.753269	-6.50394
ENSG00000077312	SNRPA	-0.0838697	1.01116	-0.670683	0.502974	0.638197	-6.26993
ENSG00000077327	SPAG6	-0.844627	-0.64575	-4.22832	3.18817e-05	0.000462214	2.13042
ENSG00000077380	DYNC1I2	-0.0909605	2.05553	-0.820558	0.412594	0.55722	-6.26305
ENSG00000077420	APBB1IP	0.490975	3.73358	3.97258	9.04181e-05	0.00106019	0.928181
ENSG00000077454	LRCH4	0.124165	3.32735	1.24091	0.215673	0.350864	-5.88468
ENSG00000077458	FAM76B	0.134351	1.36027	0.994379	0.320894	0.467221	-6.02967
ENSG00000077463	SIRT6	-0.0792157	1.26963	-0.681306	0.496239	0.632113	-6.29727
ENSG00000077514	POLD3	0.110257	1.09417	1.06578	0.287438	0.432751	-5.93128
ENSG00000077549	CAPZB	0.243485	4.4638	3.77158	0.000197799	0.0019441	0.196528
ENSG00000077585	GPR137B	0.0811282	2.75598	0.676402	0.499342	0.634916	-6.40028
ENSG00000077684	JADE1	-0.0877492	0.0626829	-0.715849	0.474679	0.613945	-6.07385
ENSG00000077721	UBE2A	0.158529	2.46991	1.69026	0.0920869	0.192178	-5.21285
ENSG00000077782	FGFR1	-0.757806	0.279225	-3.95155	9.82835e-05	0.00112631	1.00647
ENSG00000077984	CST7	0.922341	4.3499	4.63991	5.3516e-06	0.000110908	3.58339
ENSG00000078043	PIAS2	-0.538791	0.0993551	-3.51476	0.00051288	0.00411474	-0.479282
ENSG00000078061	ARAF	0.135929	1.78386	1.45573	0.146585	0.269515	-5.52562
ENSG00000078070	MCCC1	-0.277672	-0.0474751	-1.70127	0.0899987	0.189103	-4.91634
ENSG00000078081	LAMP3	1.02735	1.41107	4.37796	1.69166e-05	0.00027991	2.60715
ENSG00000078098	FAP	1.44611	0.203946	4.84851	2.0621e-06	4.98754e-05	4.653
ENSG00000078114	NEBL	-0.585209	-0.271879	-2.80031	0.00545945	0.023759	-2.53904
ENSG00000078124	ACER3	0.146831	1.62014	1.16019	0.246958	0.387976	-5.88874
ENSG00000078140	UBE2K	0.181356	2.01569	1.5918	0.112554	0.222263	-5.33958
ENSG00000078142	PIK3C3	0.116254	1.70495	1.15379	0.249566	0.3907	-5.90683
ENSG00000078269	SYNJ2	-0.286262	0.518477	-2.432	0.0156407	0.0525664	-3.56984
ENSG00000078304	PPP2R5C	0.0599293	4.03951	0.757315	0.449496	0.591952	-6.36666
ENSG00000078369	GNB1	0.101919	4.94843	1.54063	0.124532	0.239246	-5.47846
ENSG00000078401	EDN1	-0.260109	0.665465	-1.23269	0.218721	0.35471	-5.71098
ENSG00000078403	MLLT10	-0.265794	1.34262	-2.02942	0.0433584	0.11188	-4.52835
ENSG00000078487	ZCWPW1	0.150139	1.47861	1.03404	0.302005	0.446924	-6.01341
ENSG00000078618	NRDC	0.0529639	4.02768	0.736795	0.461862	0.602762	-6.38176
ENSG00000078668	VDAC3	0.194099	1.25739	1.643	0.101502	0.206071	-5.18613
ENSG00000078674	PCM1	-0.0579007	2.79017	-0.573191	0.566974	0.691524	-6.46943
ENSG00000078687	TNRC6C	0.275279	0.165545	2.13938	0.0332668	0.0918335	-4.10585
ENSG00000078699	CBFA2T2	0.00365655	0.156568	0.0336239	0.973201	0.983592	-6.33768
ENSG00000078747	ITCH	0.103608	2.48382	1.15154	0.25049	0.39168	-5.96254
ENSG00000078804	TP53INP2	-0.177233	1.97082	-1.37413	0.170496	0.298481	-5.66476
ENSG00000078808	SDF4	-0.00574109	3.15211	-0.0664867	0.947038	0.967811	-6.63776
ENSG00000078814	MYH7B	0.000160412	-0.21582	0.00120382	0.99904	0.999641	-6.25777
ENSG00000078902	TOLLIP	-0.0558452	2.55013	-0.549076	0.583389	0.705947	-6.47404
ENSG00000078967	UBE2D4	-0.671838	0.54756	-2.90683	0.00394201	0.0186833	-2.37929
ENSG00000079134	THOC1	-0.259568	0.203775	-1.82666	0.0688114	0.155505	-4.73906
ENSG00000079215	SLC1A3	0.140953	2.38065	0.918398	0.359198	0.50593	-6.19247
ENSG00000079246	XRCC5	-0.00663397	2.93759	-0.0795447	0.936656	0.961063	-6.63133
ENSG00000079263	SP140	0.644009	3.11876	3.60855	0.00036442	0.00316066	-0.353708
ENSG00000079277	MKNK1	-0.179912	4.4686	-1.65867	0.0982978	0.201492	-5.29701
ENSG00000079308	TNS1	-0.305195	2.14154	-2.03615	0.0426731	0.110488	-4.57753
ENSG00000079313	REXO1	-0.234579	1.5955	-1.47153	0.142266	0.263494	-5.50291
ENSG00000079332	SAR1A	0.0171337	2.2625	0.205353	0.837445	0.896651	-6.58587
ENSG00000079335	CDC14A	-0.0360308	0.354807	-0.352611	0.724645	0.818659	-6.32149
ENSG00000079385	CEACAM1	0.986913	3.63209	6.4441	5.0397e-10	5.22219e-08	12.4467
ENSG00000079387	SENP1	0.15979	0.762518	1.43985	0.151023	0.274903	-5.42716
ENSG00000079432	CIC	-0.143137	2.4175	-1.36022	0.174851	0.304104	-5.70729
ENSG00000079459	FDFT1	-0.0734604	1.84607	-0.745183	0.456784	0.598427	-6.30535
ENSG00000079739	PGM1	-0.187648	0.30048	-1.42935	0.154015	0.278341	-5.39
ENSG00000079785	DDX1	-0.400488	0.197398	-3.02596	0.00270808	0.0140233	-1.97774
ENSG00000079805	DNM2	-0.195639	4.59978	-2.34992	0.0194693	0.061705	-3.94868
ENSG00000079819	EPB41L2	-0.402033	0.267634	-2.79407	0.00556296	0.0241347	-2.62879
ENSG00000079950	STX7	0.25869	2.58527	2.5014	0.0129397	0.0460804	-3.56672
ENSG00000079974	RABL2B	-0.658159	0.747414	-4.48962	1.04244e-05	0.000190033	3.05384
ENSG00000079999	KEAP1	0.00800109	1.34723	0.071231	0.943265	0.966333	-6.5243
ENSG00000080189	SLC35C2	0.131678	1.21712	1.39144	0.165194	0.292687	-5.56095
ENSG00000080298	RFX3	-0.190746	0.65454	-1.30603	0.19261	0.325223	-5.60477
ENSG00000080345	RIF1	0.261433	0.862293	2.68884	0.00759843	0.0306302	-2.95433
ENSG00000080371	RAB21	0.0728389	3.144	0.653312	0.514089	0.647529	-6.4289
ENSG00000080503	SMARCA2	-0.411841	3.21649	-2.6028	0.00973748	0.0370815	-3.34118
ENSG00000080603	SRCAP	-0.0618635	1.73955	-0.675344	0.500013	0.635574	-6.34495
ENSG00000080608	PUM3	-0.299272	-0.051749	-1.97748	0.0489644	0.122585	-4.41959
ENSG00000080802	CNOT4	0.283073	0.946974	3.20619	0.0015004	0.00907889	-1.5137
ENSG00000080815	PSEN1	0.20712	4.12425	2.5219	0.0122252	0.0441307	-3.54604
ENSG00000080822	CLDND1	0.305041	2.1443	2.73598	0.00661549	0.0275944	-2.95016
ENSG00000080823	MOK	-0.832756	1.07774	-4.86415	1.91725e-06	4.64863e-05	4.62075
ENSG00000080824	HSP90AA1	-0.26086	5.24402	-1.87041	0.0624669	0.145166	-4.9222
ENSG00000080845	DLGAP4	-0.0528219	2.35026	-0.588112	0.55693	0.682402	-6.44164
ENSG00000081019	RSBN1	0.214047	0.684575	1.55911	0.120096	0.232812	-5.22878
ENSG00000081041	CXCL2	-0.747251	4.69321	-3.71476	0.00024535	0.00232456	0.00216188
ENSG00000081059	TCF7	0.348227	0.446857	2.45717	0.0146081	0.0502277	-3.4504
ENSG00000081087	OSTM1	0.063902	2.57953	0.660041	0.509768	0.644759	-6.4061
ENSG00000081154	PCNP	0.219489	2.13327	1.8965	0.0589196	0.139726	-4.83048
ENSG00000081189	MEF2C	-0.176253	1.68353	-0.874465	0.382612	0.529463	-6.18856
ENSG00000081237	PTPRC	0.426843	6.5504	3.32394	0.00100537	0.00682544	-1.278
ENSG00000081307	UBA5	-0.445641	-0.074445	-2.95582	0.0033829	0.0166257	-2.14231
ENSG00000081320	STK17B	0.223285	3.94848	1.82387	0.0692342	0.156174	-5.01671
ENSG00000081665	ZNF506	-0.185365	0.913514	-1.58852	0.113293	0.22323	-5.24942
ENSG00000081760	AACS	-0.503932	1.20414	-3.28334	0.00115568	0.00756922	-1.33857
ENSG00000081791	DELE1	-0.0181663	1.33372	-0.193544	0.846673	0.903564	-6.50931
ENSG00000081870	HSPB11	-0.386863	-0.159883	-2.45346	0.0147564	0.0505435	-3.40793
ENSG00000081913	PHLPP1	-0.218305	0.957067	-1.69182	0.0917886	0.191708	-5.09256
ENSG00000081923	ATP8B1	-0.34144	-0.272838	-2.01614	0.0447372	0.114596	-4.32418
ENSG00000082014	SMARCD3	0.653001	1.25743	3.81125	0.000169919	0.00172599	0.463066
ENSG00000082068	WDR70	0.195367	0.281236	1.50307	0.133944	0.251823	-5.25036
ENSG00000082074	FYB1	0.779022	5.00051	6.07195	4.08809e-09	2.71914e-07	10.4308
ENSG00000082153	BZW1	-0.0193137	3.80962	-0.216643	0.828644	0.891689	-6.62546
ENSG00000082212	ME2	0.110878	1.81036	1.24564	0.213934	0.349133	-5.80745
ENSG00000082213	C5orf22	-0.0680512	0.094357	-0.532632	0.59471	0.71525	-6.1949
ENSG00000082258	CCNT2	0.098907	1.53565	0.931794	0.352243	0.498989	-6.11748
ENSG00000082397	EPB41L3	-0.138651	2.77718	-1.18134	0.238468	0.378242	-5.9448
ENSG00000082515	MRPL22	0.268519	-0.217794	1.64599	0.100884	0.205261	-4.92519
ENSG00000082641	NFE2L1	0.0422394	2.50684	0.376806	0.706602	0.804696	-6.54752
ENSG00000082701	GSK3B	0.239875	1.6811	2.60889	0.0095701	0.0365999	-3.24607
ENSG00000082781	ITGB5	-0.895627	0.138356	-5.28156	2.57002e-07	9.04902e-06	6.56942
ENSG00000082805	ERC1	0.00595562	1.70815	0.0506059	0.959676	0.976136	-6.56505
ENSG00000082898	XPO1	0.042881	2.85533	0.453108	0.65082	0.760798	-6.5306
ENSG00000082996	RNF13	0.293544	4.74725	3.10821	0.00207527	0.0114641	-1.96105
ENSG00000083099	LYRM2	-0.116232	0.370075	-0.956444	0.33967	0.486991	-5.93906
ENSG00000083168	KAT6A	0.221028	2.89624	2.64808	0.00855249	0.0335957	-3.21444
ENSG00000083223	TUT7	0.0868957	3.41625	0.80473	0.421656	0.565347	-6.32478
ENSG00000083290	ULK2	-0.292442	0.360724	-1.74667	0.0817867	0.17598	-4.9108
ENSG00000083312	TNPO1	0.0238117	2.48708	0.28837	0.773276	0.854694	-6.57568
ENSG00000083444	PLOD1	-0.160394	1.40349	-1.44716	0.148967	0.272318	-5.51537
ENSG00000083457	ITGAE	-0.353623	0.792922	-2.86175	0.00452982	0.0206825	-2.5209
ENSG00000083520	DIS3	0.0967598	0.267043	0.967158	0.334297	0.481747	-5.89084
ENSG00000083535	PIBF1	0.0613439	-0.176342	0.422858	0.672722	0.779458	-6.1663
ENSG00000083642	PDS5B	0.15936	0.949026	1.75965	0.0795554	0.17246	-4.95125
ENSG00000083799	CYLD	0.433725	3.03741	4.52915	8.76241e-06	0.000165879	3.12811
ENSG00000083828	ZNF586	-0.103974	0.93553	-1.03256	0.302699	0.447817	-5.96009
ENSG00000083844	ZNF264	-0.266409	0.748276	-2.24031	0.0258523	0.0762175	-4.02239
ENSG00000083845	RPS5	-0.152538	3.63722	-1.07069	0.28523	0.430249	-6.08343
ENSG00000083857	FAT1	-0.316704	-0.148955	-1.8836	0.0606518	0.14253	-4.58859
ENSG00000083896	YTHDC1	0.0678161	2.82493	0.748713	0.454657	0.596832	-6.3538
ENSG00000083937	CHMP2B	0.422305	2.29709	4.46101	1.18121e-05	0.000208012	2.86953
ENSG00000084070	SMAP2	0.224111	4.23856	1.56037	0.119798	0.232601	-5.45305
ENSG00000084072	PPIE	-0.536421	-0.077359	-3.86359	0.000138785	0.00149094	0.732756
ENSG00000084073	ZMPSTE24	0.0688192	1.04993	0.66204	0.508488	0.643635	-6.27166
ENSG00000084090	STARD7	-0.303321	1.38158	-2.73366	0.00666112	0.0276792	-2.92122
ENSG00000084093	REST	0.0467795	0.891193	0.490507	0.624158	0.739494	-6.3473
ENSG00000084110	HAL	-0.224437	1.5964	-1.17733	0.24006	0.379684	-5.88243
ENSG00000084112	SSH1	0.0299941	2.00495	0.239783	0.810673	0.879174	-6.55997
ENSG00000084207	GSTP1	-0.313871	3.63277	-1.51998	0.12964	0.246128	-5.5126
ENSG00000084234	APLP2	-0.298633	5.14951	-3.48157	0.00057783	0.00449302	-0.786393
ENSG00000084463	WBP11	-0.193164	0.846009	-1.88451	0.0605287	0.142376	-4.74026
ENSG00000084623	EIF3I	-0.204053	2.11506	-1.90249	0.0581296	0.138353	-4.82956
ENSG00000084652	TXLNA	0.224229	0.616776	2.06294	0.0400373	0.10541	-4.34463
ENSG00000084676	NCOA1	0.170946	2.48132	1.53365	0.12624	0.241819	-5.45943
ENSG00000084733	RAB10	0.0997028	4.02023	1.11959	0.263845	0.407381	-6.0321
ENSG00000084754	HADHA	0.00874496	2.22952	0.116408	0.907412	0.94267	-6.59647
ENSG00000084764	MAPRE3	-0.713532	-0.0965864	-4.76436	3.04161e-06	6.93094e-05	4.26708
ENSG00000084774	CAD	-0.597111	-0.143725	-4.00431	7.96736e-05	0.000971879	1.24853
ENSG00000085063	CD59	0.0354497	3.52023	0.302953	0.76215	0.846413	-6.6006
ENSG00000085117	CD82	-0.110295	5.10305	-0.886218	0.376258	0.523175	-6.25427
ENSG00000085224	ATRX	0.111736	2.40382	0.997328	0.319464	0.465896	-6.12141
ENSG00000085231	AK6	-0.439269	0.640003	-3.08592	0.00223172	0.0121712	-1.8717
ENSG00000085265	FCN1	0.552668	1.97566	3.97123	9.09044e-05	0.00106405	0.980065
ENSG00000085276	MECOM	-0.303072	-0.259909	-1.5273	0.127811	0.243785	-5.1558
ENSG00000085365	SCAMP1	-0.0715893	0.33669	-0.655669	0.512574	0.646563	-6.16307
ENSG00000085415	SEH1L	-0.370973	0.200776	-3.27048	0.00120748	0.00779437	-1.25647
ENSG00000085433	WDR47	-0.032011	0.336536	-0.257502	0.79698	0.870365	-6.33936
ENSG00000085449	WDFY1	0.302866	2.7139	2.57796	0.0104482	0.0389002	-3.38395
ENSG00000085491	SLC25A24	0.0989211	1.12108	0.872788	0.383524	0.530403	-6.11793
ENSG00000085511	MAP3K4	-0.439532	0.0536143	-3.13862	0.00187809	0.0106375	-1.63506
ENSG00000085514	PILRA	0.0367824	4.42165	0.315373	0.752712	0.840197	-6.59975
ENSG00000085662	AKR1B1	-0.910283	1.05026	-5.73396	2.53062e-08	1.30426e-06	8.7282
ENSG00000085719	CPNE3	-0.0465373	1.37151	-0.343004	0.731852	0.824862	-6.47508
ENSG00000085721	RRN3	0.00486175	0.24442	0.039199	0.96876	0.981594	-6.35117
ENSG00000085733	CTTN	-0.443254	0.530615	-2.24044	0.0258437	0.0762175	-4.00189
ENSG00000085788	DDHD2	-0.247975	0.188951	-1.64736	0.100602	0.20491	-5.04705
ENSG00000085831	TTC39A	-0.00419479	-0.347709	-0.0248998	0.980153	0.987985	-6.23239
ENSG00000085832	EPS15	0.106231	2.08211	1.32521	0.186179	0.31714	-5.72922
ENSG00000085871	MGST2	-0.393163	0.0305151	-2.5926	0.0100238	0.0377917	-3.10837
ENSG00000085872	CHERP	-0.0787432	0.937407	-0.93047	0.352926	0.499527	-6.05827
ENSG00000085978	ATG16L1	-0.148235	0.735329	-1.15563	0.248814	0.389896	-5.79361
ENSG00000085982	USP40	-0.335622	0.0536742	-1.90033	0.0584136	0.138761	-4.59839
ENSG00000085998	POMGNT1	-0.478697	-0.299583	-3.00077	0.0029347	0.014975	-1.98663
ENSG00000086015	MAST2	-0.4289	0.241048	-3.54594	0.00045816	0.00377206	-0.384702
ENSG00000086061	DNAJA1	0.401235	4.22025	3.92225	0.000110334	0.00123564	0.739468
ENSG00000086062	B4GALT1	0.141327	3.19901	1.46354	0.144437	0.266488	-5.58679
ENSG00000086065	CHMP5	0.636306	2.49296	5.42744	1.23624e-07	4.8292e-06	7.18835
ENSG00000086102	NFX1	-0.221137	1.00513	-2.40097	0.0170017	0.0556955	-3.69814
ENSG00000086200	IPO11	0.358873	1.75651	2.14187	0.0330642	0.0913254	-4.31735
ENSG00000086232	EIF2AK1	-0.00983966	1.07799	-0.0935157	0.925561	0.953555	-6.48531
ENSG00000086300	SNX10	0.346542	4.41115	2.65893	0.00828851	0.0327285	-3.20374
ENSG00000086504	MRPL28	0.0389899	1.10803	0.371341	0.710664	0.807826	-6.42641
ENSG00000086544	ITPKC	-0.444419	0.949976	-3.14081	0.00186458	0.0105792	-1.74248
ENSG00000086548	CEACAM6	-0.00801837	1.36482	-0.0341258	0.972801	0.983289	-6.52863
ENSG00000086589	RBM22	0.137783	1.88587	1.6359	0.102981	0.208247	-5.26445
ENSG00000086598	TMED2	-0.0128811	2.67665	-0.108646	0.913561	0.946442	-6.61985
ENSG00000086619	ERO1B	0.252916	0.148989	1.96156	0.0508014	0.125999	-4.45928
ENSG00000086666	ZFAND6	0.0866507	3.17466	0.97559	0.330107	0.476897	-6.17116
ENSG00000086730	LAT2	0.38931	3.75407	3.86213	0.000139579	0.00149675	0.522707
ENSG00000086758	HUWE1	-0.105767	2.39329	-1.24718	0.21337	0.348386	-5.85017
ENSG00000086848	ALG9	-0.767485	0.499241	-5.22232	3.44469e-07	1.15732e-05	6.27686
ENSG00000087008	ACOX3	0.0292428	0.392752	0.259158	0.795703	0.86927	-6.35099
ENSG00000087074	PPP1R15A	0.064877	6.49393	0.512683	0.608576	0.726425	-6.48691
ENSG00000087077	TRIP6	-0.177264	0.392987	-1.34177	0.180755	0.311239	-5.51725
ENSG00000087086	FTL	-0.157044	9.61954	-1.35847	0.175404	0.304636	-5.64366
ENSG00000087087	SRRT	-0.129078	2.52781	-1.38751	0.166387	0.293691	-5.67513
ENSG00000087088	BAX	-0.0498899	2.56966	-0.418583	0.675841	0.782059	-6.53634
ENSG00000087111	PIGS	0.139333	0.957437	1.31053	0.191088	0.32343	-5.62909
ENSG00000087152	ATXN7L3	0.0879032	2.68982	1.05635	0.291715	0.436603	-6.07582
ENSG00000087157	PGS1	0.279103	4.42446	2.31691	0.0212279	0.0659765	-4.02523
ENSG00000087191	PSMC5	-0.180407	1.87526	-1.78752	0.0749316	0.165058	-5.02051
ENSG00000087206	UIMC1	0.00312377	2.06252	0.0282575	0.977477	0.985789	-6.59335
ENSG00000087237	CETP	0.734215	-0.151455	4.8804	1.77727e-06	4.36295e-05	4.78995
ENSG00000087253	LPCAT2	0.724165	2.85763	5.26043	2.8539e-07	9.823e-06	6.38307
ENSG00000087263	OGFOD1	-0.178126	0.0212816	-1.35211	0.177428	0.307393	-5.43398
ENSG00000087266	SH3BP2	0.158171	5.02346	1.41403	0.15846	0.284131	-5.66111
ENSG00000087274	ADD1	0.0224936	3.39346	0.315006	0.752991	0.840317	-6.59521
ENSG00000087302	RTRAF	-0.151384	1.81864	-1.32498	0.186255	0.317158	-5.71716
ENSG00000087338	GMCL1	0.18017	1.00528	1.49304	0.13655	0.255501	-5.3849
ENSG00000087365	SF3B2	-0.0112161	3.07688	-0.155411	0.876609	0.923709	-6.62616
ENSG00000087460	GNAS	0.0271402	5.05694	0.321199	0.748298	0.837317	-6.59221
ENSG00000087470	DNM1L	-0.0647918	1.5287	-0.620585	0.535376	0.665771	-6.35997
ENSG00000087502	ERGIC2	0.172802	1.56528	1.2927	0.197177	0.330666	-5.72491
ENSG00000087589	CASS4	0.0779336	0.605563	0.409156	0.682737	0.787078	-6.32992
ENSG00000087884	AAMDC	-0.238794	0.438559	-1.35042	0.177966	0.308015	-5.51758
ENSG00000087903	RFX2	-0.142998	2.92029	-1.19607	0.232677	0.371348	-5.93187
ENSG00000088038	CNOT3	0.217571	2.04256	2.10745	0.0359645	0.0971555	-4.41536
ENSG00000088205	DDX18	-0.204187	1.32005	-2.19629	0.0288882	0.0828358	-4.18525
ENSG00000088247	KHSRP	-0.131722	2.59531	-1.15626	0.248556	0.389802	-5.9662
ENSG00000088256	GNA11	-0.46265	0.455705	-2.49914	0.0130204	0.0462383	-3.40149
ENSG00000088280	ASAP3	-0.469465	0.468163	-2.70229	0.00730536	0.0297165	-2.90603
ENSG00000088298	EDEM2	0.220801	1.48309	1.94853	0.0523467	0.128793	-4.68019
ENSG00000088367	EPB41L1	-1.26731	-0.543116	-6.40178	6.4225e-10	6.25971e-08	12.2082
ENSG00000088387	DOCK9	-0.369535	-0.0849414	-2.12359	0.0345783	0.0947895	-4.14032
ENSG00000088448	ANKRD10	0.530488	4.75773	3.2405	0.00133673	0.00834949	-1.56192
ENSG00000088682	COQ9	-0.124115	0.0146224	-0.867065	0.386646	0.533298	-5.94758
ENSG00000088727	KIF9	-0.68973	-0.525903	-4.31515	2.21189e-05	0.000345069	2.45772
ENSG00000088766	CRLS1	-0.522607	0.125449	-3.6867	0.000272623	0.00252702	0.0997195
ENSG00000088808	PPP1R13B	-0.6401	-0.0245151	-4.19417	3.67524e-05	0.000517584	1.95022
ENSG00000088826	SMOX	-0.242881	0.334768	-1.62327	0.105653	0.211564	-5.11178
ENSG00000088827	SIGLEC1	1.09186	1.49155	3.8119	0.0001695	0.00172599	0.471422
ENSG00000088832	FKBP1A	0.160336	4.70513	1.94954	0.0522253	0.128591	-4.78464
ENSG00000088833	NSFL1C	-0.129858	2.57823	-1.56018	0.119842	0.232642	-5.42867
ENSG00000088836	SLC4A11	-0.538958	-0.292393	-2.21572	0.0275125	0.0798448	-3.92683
ENSG00000088930	XRN2	0.429966	1.94129	3.90748	0.000116924	0.00129618	0.746501
ENSG00000088986	DYNLL1	-0.202159	3.31237	-1.28888	0.198501	0.331955	-5.8273
ENSG00000088992	TESC	0.760824	0.434364	4.00082	8.07931e-05	0.000979468	1.23726
ENSG00000089006	SNX5	-0.268788	1.95324	-3.04785	0.00252428	0.0133382	-2.09252
ENSG00000089009	RPL6	-0.171277	4.10125	-1.4315	0.153398	0.277699	-5.64196
ENSG00000089022	MAPKAPK5	-0.211789	0.380632	-1.88213	0.0608518	0.142863	-4.67105
ENSG00000089041	P2RX7	0.444247	1.88468	2.69691	0.00742132	0.0300022	-3.03227
ENSG00000089053	ANAPC5	-0.146071	1.9104	-1.66988	0.0960559	0.1984	-5.22038
ENSG00000089057	SLC23A2	0.360417	0.481068	2.84136	0.00482104	0.0216112	-2.49366
ENSG00000089060	SLC8B1	-0.0766318	2.08448	-0.827846	0.40846	0.554069	-6.25767
ENSG00000089063	TMEM230	-0.318623	1.28702	-3.13203	0.00191928	0.0108148	-1.79732
ENSG00000089094	KDM2B	-0.105591	0.744155	-0.925774	0.355358	0.501742	-6.02995
ENSG00000089101	CFAP61	-0.907656	-0.966273	-4.37194	1.73598e-05	0.000286143	2.69613
ENSG00000089127	OAS1	1.48453	3.68864	5.59078	5.35182e-08	2.38386e-06	7.97756
ENSG00000089154	GCN1	-0.309633	1.27726	-2.16682	0.0310887	0.0871899	-4.24142
ENSG00000089157	RPLP0	-0.326332	4.12269	-2.30219	0.0220558	0.0678491	-4.05828
ENSG00000089159	PXN	0.17571	4.255	1.50391	0.133728	0.251465	-5.53773
ENSG00000089220	PEBP1	-0.475433	1.46285	-4.18604	3.80123e-05	0.000532281	1.79752
ENSG00000089248	ERP29	-0.023417	1.45627	-0.204677	0.837972	0.89702	-6.5171
ENSG00000089280	FUS	-0.060446	4.12389	-0.846864	0.397792	0.544247	-6.29614
ENSG00000089289	IGBP1	0.361163	0.71455	3.3618	0.00088178	0.00617372	-0.997166
ENSG00000089327	FXYD5	0.228485	3.42955	1.96623	0.0502561	0.124961	-4.74843
ENSG00000089335	ZNF302	-0.383331	-0.321728	-2.36978	0.0184742	0.0592957	-3.57379
ENSG00000089351	GRAMD1A	0.0635889	5.66154	0.426436	0.670117	0.777171	-6.54333
ENSG00000089356	FXYD3	-0.472381	0.776545	-1.85523	0.0646112	0.14878	-4.80016
ENSG00000089486	CDIP1	-0.261984	0.405034	-1.81276	0.0709366	0.158741	-4.80973
ENSG00000089505	CMTM1	0.580068	1.20388	3.27091	0.00120573	0.00778822	-1.32939
ENSG00000089597	GANAB	-0.189045	2.28121	-2.0996	0.0366555	0.0983207	-4.45451
ENSG00000089639	GMIP	0.285621	3.88921	2.69664	0.00742732	0.0300142	-3.1056
ENSG00000089692	LAG3	1.03129	0.00885746	4.04089	6.8792e-05	0.000861563	1.43349
ENSG00000089693	MLF2	-0.0106969	2.95882	-0.120981	0.903792	0.940479	-6.62834
ENSG00000089737	DDX24	-0.275434	1.7701	-2.72577	0.00681812	0.0281651	-2.97038
ENSG00000089775	ZBTB25	-0.0847757	0.0775096	-0.755779	0.450415	0.592824	-6.04987
ENSG00000089818	NECAP1	0.305544	2.55779	3.11098	0.00205656	0.0113826	-1.92587
ENSG00000089820	ARHGAP4	0.324685	3.29592	2.90969	0.00390724	0.0185542	-2.52506
ENSG00000089876	DHX32	-0.574452	-0.355621	-3.41011	0.000744611	0.00543765	-0.750953
ENSG00000089902	RCOR1	0.0664627	1.7414	0.626987	0.531177	0.662306	-6.36926
ENSG00000089916	GPATCH2L	0.034398	2.17097	0.370541	0.711258	0.808315	-6.53198
ENSG00000090006	LTBP4	-0.308124	0.922092	-1.70472	0.0893523	0.187985	-5.06671
ENSG00000090013	BLVRB	-0.0812824	2.15812	-0.597547	0.550623	0.677711	-6.42636
ENSG00000090020	SLC9A1	0.0748943	1.30393	0.7776	0.437459	0.579823	-6.22175
ENSG00000090054	SPTLC1	-0.137821	2.23642	-1.345	0.179711	0.309875	-5.71913
ENSG00000090060	PAPOLA	0.037317	3.85023	0.530113	0.596452	0.716604	-6.51012
ENSG00000090061	CCNK	0.124623	2.13623	1.48378	0.138989	0.258738	-5.5138
ENSG00000090104	RGS1	0.104445	2.71876	0.586609	0.557937	0.683381	-6.4543
ENSG00000090238	YPEL3	0.207646	3.69605	1.48626	0.138333	0.257907	-5.56099
ENSG00000090263	MRPS33	-0.475043	-0.381902	-2.83052	0.00498274	0.0221684	-2.43187
ENSG00000090266	NDUFB2	-0.350473	2.46781	-2.84261	0.00480268	0.0215682	-2.6946
ENSG00000090273	NUDC	-0.565908	1.52393	-4.46429	1.16442e-05	0.000206161	2.90108
ENSG00000090316	MAEA	-0.192968	3.59425	-1.6624	0.0975487	0.200432	-5.29071
ENSG00000090339	ICAM1	0.370923	5.1541	3.32764	0.000992604	0.00677144	-1.28642
ENSG00000090372	STRN4	-0.152638	2.9229	-1.71435	0.0875665	0.185178	-5.19359
ENSG00000090376	IRAK3	0.135677	4.4109	0.869079	0.385545	0.532056	-6.2764
ENSG00000090382	LYZ	-0.0975716	6.12108	-0.73229	0.464602	0.605446	-6.35923
ENSG00000090432	MUL1	0.0892049	-0.117681	0.764965	0.444934	0.58734	-5.98353
ENSG00000090487	SPG21	0.152504	2.94329	1.90107	0.0583154	0.13866	-4.86197
ENSG00000090520	DNAJB11	-0.0662985	1.79354	-0.581014	0.561697	0.686846	-6.40897
ENSG00000090581	GNPTG	-0.093658	2.2609	-0.859213	0.390956	0.537735	-6.24575
ENSG00000090615	GOLGA3	-0.348415	1.3536	-3.02393	0.00272574	0.0140999	-2.12261
ENSG00000090621	PABPC4	-0.33248	2.69005	-2.90796	0.00392826	0.0186271	-2.52217
ENSG00000090661	CERS4	-0.528774	0.86753	-3.83544	0.000154791	0.00162102	0.535254
ENSG00000090674	MCOLN1	-0.319683	3.51822	-3.08365	0.00224825	0.0122411	-2.03384
ENSG00000090686	USP48	-0.0711593	1.51879	-0.708878	0.478988	0.617652	-6.30239
ENSG00000090857	PDPR	-0.0130367	0.672883	-0.132745	0.89449	0.935447	-6.42567
ENSG00000090861	AARS1	-0.292853	0.858803	-2.38218	0.017876	0.0577524	-3.72827
ENSG00000090863	GLG1	0.125446	2.07264	1.49935	0.134906	0.253099	-5.48717
ENSG00000090905	TNRC6A	0.0125744	1.04092	0.0945764	0.924719	0.953087	-6.48342
ENSG00000090924	PLEKHG2	0.309436	3.63677	2.00964	0.0454256	0.115706	-4.66557
ENSG00000090989	EXOC1	0.339884	1.13766	3.15961	0.00175227	0.0101169	-1.6734
ENSG00000091039	OSBPL8	0.0896172	3.51327	0.930652	0.352833	0.499513	-6.21878
ENSG00000091073	DTX2	-0.0913531	3.36676	-1.0902	0.276559	0.420911	-6.0595
ENSG00000091106	NLRC4	0.617522	1.58182	4.1993	3.59785e-05	0.000508868	1.87581
ENSG00000091136	LAMB1	-0.574628	0.381691	-3.71507	0.000245063	0.00232408	0.159386
ENSG00000091140	DLD	-0.208595	1.72221	-1.90709	0.0575292	0.137256	-4.79428
ENSG00000091157	WDR7	0.254033	0.815936	1.95347	0.0517562	0.127691	-4.58212
ENSG00000091164	TXNL1	0.00913128	1.33001	0.0920687	0.926709	0.954463	-6.52162
ENSG00000091317	CMTM6	0.246198	4.13045	2.61035	0.00953034	0.036533	-3.32715
ENSG00000091409	ITGA6	-0.242561	-0.221156	-1.569	0.117774	0.229545	-5.08775
ENSG00000091436	MAP3K20	0.241745	1.73609	2.06805	0.03955	0.104434	-4.46836
ENSG00000091483	FH	-0.462788	-0.379862	-3.02755	0.00269429	0.0139813	-1.89185
ENSG00000091490	SEL1L3	0.0530153	1.63333	0.472945	0.63662	0.749647	-6.44607
ENSG00000091527	CDV3	-0.0651166	3.0237	-0.685071	0.493864	0.630148	-6.40591
ENSG00000091542	ALKBH5	-0.231695	1.1261	-2.04482	0.0418043	0.108983	-4.47558
ENSG00000091592	NLRP1	-0.0828917	1.62688	-0.677987	0.498338	0.633927	-6.33176
ENSG00000091640	SPAG7	-0.295895	2.30933	-3.08723	0.00222223	0.0121329	-1.99627
ENSG00000091651	ORC6	-0.505659	2.07789	-3.66722	0.000293213	0.00266764	-0.135325
ENSG00000092010	PSME1	0.594345	4.00271	5.47439	9.73656e-08	3.94431e-06	7.39353
ENSG00000092020	PPP2R3C	0.32495	2.21132	3.00732	0.00287415	0.014713	-2.21059
ENSG00000092036	HAUS4	0.576238	2.12104	4.25742	2.82236e-05	0.000425471	2.0645
ENSG00000092068	SLC7A8	-1.14239	-0.0111431	-6.55034	2.72853e-10	3.19757e-08	13.0479
ENSG00000092094	OSGEP	-0.338252	0.597058	-3.55798	0.000438552	0.00365856	-0.387353
ENSG00000092098	RNF31	0.396508	2.34196	3.84326	0.000150179	0.00158452	0.488733
ENSG00000092108	SCFD1	0.0391434	2.05901	0.380014	0.704222	0.802914	-6.5214
ENSG00000092140	G2E3	-0.10054	1.0253	-0.596339	0.551429	0.678618	-6.3168
ENSG00000092148	HECTD1	-0.201901	2.17764	-2.05819	0.0404942	0.106243	-4.53415
ENSG00000092199	HNRNPC	0.0597852	5.43965	0.844668	0.399015	0.545391	-6.2856
ENSG00000092201	SUPT16H	-0.153767	0.819191	-1.63462	0.103249	0.208575	-5.16345
ENSG00000092203	TOX4	0.114405	2.33977	1.31285	0.190304	0.32238	-5.76052
ENSG00000092208	GEMIN2	-0.300567	-0.416273	-1.69956	0.090321	0.189537	-4.84951
ENSG00000092330	TINF2	0.161112	2.52778	1.93412	0.054103	0.131504	-4.78481
ENSG00000092439	TRPM7	-0.00143633	1.37194	-0.0136587	0.989112	0.994032	-6.53115
ENSG00000092529	CAPN3	0.180014	0.453998	1.61561	0.107302	0.214168	-5.11138
ENSG00000092531	SNAP23	0.151614	3.28605	1.77887	0.0763429	0.167153	-5.08886
ENSG00000092621	PHGDH	-0.342132	-0.442936	-1.85853	0.0641395	0.148213	-4.58486
ENSG00000092820	EZR	-0.122957	3.93976	-0.919965	0.35838	0.505067	-6.23227
ENSG00000092841	MYL6	-0.0945218	6.75163	-1.11164	0.267242	0.411115	-6.00135
ENSG00000092847	AGO1	0.0451272	0.0114464	0.456047	0.648708	0.759825	-6.19792
ENSG00000092871	RFFL	0.0880043	2.65797	0.874931	0.382359	0.529463	-6.24712
ENSG00000092929	UNC13D	0.0737352	4.09582	0.624945	0.532514	0.663469	-6.4569
ENSG00000092931	MFSD11	-0.0772248	1.47686	-0.874613	0.382531	0.529463	-6.17219
ENSG00000092964	DPYSL2	-0.364442	1.67907	-3.28117	0.00116428	0.00759522	-1.374
ENSG00000093000	NUP50	0.0737706	2.5389	0.942948	0.346518	0.493293	-6.18092
ENSG00000093010	COMT	-0.286064	2.13113	-2.13766	0.0334073	0.0921696	-4.37074
ENSG00000093072	ADA2	0.157252	2.56622	1.26767	0.205967	0.340134	-5.82619
ENSG00000093134	VNN3	-0.0592566	3.17288	-0.358025	0.720594	0.815629	-6.57797
ENSG00000093144	ECHDC1	-0.300165	1.69399	-2.63421	0.00890102	0.0346467	-3.20204
ENSG00000093167	LRRFIP2	0.0125061	2.63246	0.143735	0.885813	0.929468	-6.61308
ENSG00000093183	SEC22C	-0.152573	0.832429	-1.30667	0.192392	0.324912	-5.63268
ENSG00000094631	HDAC6	-0.199745	2.10856	-1.83925	0.0669334	0.152557	-4.9449
ENSG00000094755	GABRP	-0.42186	0.903415	-1.72636	0.0853821	0.181534	-5.03979
ENSG00000094916	CBX5	-0.220783	0.123743	-2.37729	0.01811	0.0583743	-3.62444
ENSG00000094975	SUCO	0.267824	1.32048	2.30858	0.0216931	0.0669844	-3.92142
ENSG00000095015	MAP3K1	0.590721	1.62587	4.90455	1.58723e-06	4.00634e-05	4.80312
ENSG00000095059	DHPS	-0.177063	0.875665	-1.52646	0.128019	0.244039	-5.3395
ENSG00000095066	HOOK2	-0.2284	1.58393	-1.43013	0.153792	0.278134	-5.56168
ENSG00000095139	ARCN1	0.126075	2.03496	1.38985	0.165676	0.293224	-5.6392
ENSG00000095209	TMEM38B	-0.0709129	0.569877	-0.491227	0.623649	0.739307	-6.30403
ENSG00000095261	PSMD5	-0.14402	0.366744	-1.01559	0.310699	0.457178	-5.89049
ENSG00000095319	NUP188	-0.406396	1.00549	-3.21618	0.00145092	0.00886791	-1.52502
ENSG00000095370	SH2D3C	0.464306	2.19542	3.4242	0.000708538	0.00524425	-0.932674
ENSG00000095380	NANS	-0.118523	2.43671	-1.43833	0.151453	0.275329	-5.60087
ENSG00000095383	TBC1D2	0.234637	2.98641	1.64459	0.101172	0.205603	-5.30572
ENSG00000095397	WHRN	-0.162132	1.06105	-1.06634	0.287183	0.432533	-5.94578
ENSG00000095485	CWF19L1	-0.238974	0.480608	-2.25571	0.0248583	0.0742655	-3.95109
ENSG00000095564	BTAF1	0.065241	0.673638	0.612284	0.540845	0.669612	-6.24201
ENSG00000095787	WAC	0.24489	3.85564	2.90051	0.00401998	0.0189797	-2.55803
ENSG00000095794	CREM	0.394925	4.74939	3.50356	0.000533987	0.00425289	-0.72073
ENSG00000095906	NUBP2	-0.183263	0.299478	-1.59647	0.111508	0.220639	-5.1471
ENSG00000095951	HIVEP1	0.10818	3.43163	1.01519	0.310887	0.457317	-6.13641
ENSG00000096060	FKBP5	0.120162	2.90444	0.645057	0.519416	0.651687	-6.42579
ENSG00000096063	SRPK1	0.127484	3.16333	1.04523	0.296814	0.441565	-6.10121
ENSG00000096070	BRPF3	-0.149883	0.989149	-1.31828	0.188483	0.320232	-5.64184
ENSG00000096080	MRPS18A	0.145418	0.0412879	1.04046	0.299021	0.443775	-5.77682
ENSG00000096093	EFHC1	-0.565744	2.34917	-3.00747	0.00287282	0.014713	-2.23307
ENSG00000096384	HSP90AB1	-0.213864	4.1562	-1.54157	0.124303	0.238945	-5.48156
ENSG00000096696	DSP	-0.448002	-0.406434	-2.49043	0.0133367	0.0470716	-3.28132
ENSG00000096717	SIRT1	0.441876	0.841153	3.52725	0.000490275	0.00397224	-0.481802
ENSG00000096746	HNRNPH3	0.217511	2.95098	2.22263	0.0270368	0.0788469	-4.21666
ENSG00000096872	IFT74	-0.215047	-0.233785	-1.38263	0.167876	0.295273	-5.35438
ENSG00000096968	JAK2	0.726037	2.56815	5.56938	5.97875e-08	2.59272e-06	7.87995
ENSG00000096996	IL12RB1	0.128928	0.562857	1.11047	0.267747	0.411635	-5.80006
ENSG00000097033	SH3GLB1	0.41383	3.41353	3.4392	0.000671921	0.0050453	-0.926616
ENSG00000099139	PCSK5	-1.35058	3.27942	-2.79056	0.0056221	0.0243377	-2.8534
ENSG00000099194	SCD	-1.87224	0.478431	-8.31879	3.8901e-15	7.65884e-12	23.7606
ENSG00000099203	TMED1	0.0398509	0.791602	0.334375	0.738346	0.829239	-6.3998
ENSG00000099204	ABLIM1	-0.404987	0.31152	-2.32781	0.0206324	0.0644716	-3.77421
ENSG00000099246	RAB18	0.0945767	2.52157	0.940659	0.347688	0.494601	-6.18201
ENSG00000099250	NRP1	-0.647959	0.993089	-4.22857	3.1848e-05	0.000462214	1.99485
ENSG00000099282	TSPAN15	-0.863666	-0.586907	-4.56926	7.33727e-06	0.000143595	3.47663
ENSG00000099290	WASHC2A	0.286026	2.04658	2.274	0.0237205	0.0717592	-4.06079
ENSG00000099308	MAST3	-0.0371804	2.87316	-0.29562	0.767739	0.850796	-6.5906
ENSG00000099326	MZF1	-0.318611	-0.183019	-2.96684	0.00326758	0.0161869	-2.08972
ENSG00000099330	OCEL1	-0.334292	-0.186168	-2.10454	0.0362196	0.0975718	-4.16517
ENSG00000099331	MYO9B	-0.0227746	4.52168	-0.231997	0.816709	0.883288	-6.62169
ENSG00000099337	KCNK6	-0.224829	1.42757	-1.57875	0.115518	0.226435	-5.32776
ENSG00000099338	CATSPERG	-0.269989	-0.123615	-1.63599	0.102962	0.208247	-5.00674
ENSG00000099341	PSMD8	-0.0127149	2.59258	-0.131018	0.895855	0.936476	-6.61408
ENSG00000099364	FBXL19	0.223155	0.0933172	1.7642	0.0787856	0.171131	-4.79969
ENSG00000099377	HSD3B7	0.146369	0.922642	1.10567	0.269817	0.413655	-5.86799
ENSG00000099622	CIRBP	-0.181469	3.14547	-1.75202	0.0808609	0.17456	-5.13542
ENSG00000099624	ATP5F1D	-0.136621	1.56818	-0.986739	0.324619	0.471182	-6.07731
ENSG00000099725	PRKY	0.177263	-0.630566	0.969993	0.332884	0.480204	-5.73067
ENSG00000099783	HNRNPM	0.0731304	3.96456	0.978438	0.3287	0.475614	-6.17755
ENSG00000099785	MARCHF2	-0.0334209	2.34988	-0.31376	0.753936	0.8408	-6.56247
ENSG00000099795	NDUFB7	-0.199537	1.48257	-1.13357	0.257942	0.400403	-5.91753
ENSG00000099797	TECR	-0.377779	2.16138	-2.7901	0.00562977	0.0243602	-2.8262
ENSG00000099800	TIMM13	-0.045069	-0.144868	-0.266703	0.789893	0.866132	-6.24299
ENSG00000099804	CDC34	-0.0594324	1.71598	-0.530058	0.59649	0.716604	-6.43143
ENSG00000099810	MTAP	-0.482803	0.519696	-3.6098	0.000362746	0.00314899	-0.210184
ENSG00000099812	MISP	-0.221452	-0.366099	-1.07201	0.284634	0.429416	-5.68854
ENSG00000099817	POLR2E	-0.197419	2.18774	-1.59734	0.111313	0.220373	-5.35424
ENSG00000099821	POLRMT	-0.239131	-0.0830193	-1.67619	0.0948139	0.196536	-4.94946
ENSG00000099860	GADD45B	0.133694	5.32248	1.11481	0.265883	0.409281	-6.02775
ENSG00000099875	MKNK2	-0.295937	3.78475	-2.10193	0.0364495	0.0979816	-4.48555
ENSG00000099899	TRMT2A	-0.171438	1.1937	-1.31862	0.18837	0.320095	-5.66641
ENSG00000099901	RANBP1	-0.142339	1.24909	-1.06377	0.288344	0.433519	-5.96726
ENSG00000099904	ZDHHC8	-0.531614	-0.0285875	-3.67204	0.000287979	0.00262731	0.0643597
ENSG00000099910	KLHL22	-0.151508	0.793669	-1.41586	0.157924	0.283501	-5.48575
ENSG00000099917	MED15	0.0925137	3.40558	1.2673	0.206097	0.340177	-5.85378
ENSG00000099940	SNAP29	0.00863578	1.02885	0.095583	0.92392	0.952662	-6.47718
ENSG00000099942	CRKL	0.200506	1.29249	2.04729	0.0415594	0.108518	-4.46984
ENSG00000099949	LZTR1	0.00115154	1.02145	0.0101055	0.991944	0.995687	-6.48625
ENSG00000099956	SMARCB1	-0.00937661	1.94727	-0.116741	0.907149	0.94267	-6.57911
ENSG00000099968	BCL2L13	0.162111	1.49094	1.41651	0.157733	0.283241	-5.55236
ENSG00000099977	DDT	0.0613882	1.26784	0.455438	0.649146	0.760195	-6.41362
ENSG00000099985	OSM	0.119229	5.11116	0.602727	0.547177	0.675073	-6.46368
ENSG00000099991	CABIN1	-0.206788	1.41021	-1.71915	0.0866882	0.18378	-5.09772
ENSG00000099992	TBC1D10A	-0.420547	0.480257	-3.46408	0.000615072	0.00473028	-0.688285
ENSG00000099995	SF3A1	-0.0222215	3.30686	-0.229285	0.818814	0.884884	-6.61741
ENSG00000099998	GGT5	0.609862	0.332426	3.42061	0.000717564	0.00529513	-0.749634
ENSG00000100014	SPECC1L	0.420203	1.13468	3.0407	0.00258299	0.0135795	-2.0152
ENSG00000100023	PPIL2	-0.409519	0.705813	-2.85708	0.00459506	0.0208836	-2.51888
ENSG00000100024	UPB1	0.168687	1.32889	0.792288	0.428861	0.572125	-6.20985
ENSG00000100028	SNRPD3	-0.115627	0.97388	-0.86314	0.388797	0.535513	-6.12109
ENSG00000100029	PES1	-0.240826	1.03865	-2.12222	0.0346944	0.0950017	-4.30995
ENSG00000100030	MAPK1	0.0385374	3.04889	0.385409	0.700226	0.799748	-6.56351
ENSG00000100031	GGT1	0.0190403	1.6964	0.112466	0.910534	0.944733	-6.55803
ENSG00000100034	PPM1F	0.0977415	1.94973	0.756392	0.450048	0.592441	-6.30063
ENSG00000100055	CYTH4	0.305074	5.14767	2.3568	0.0191194	0.0609097	-3.92993
ENSG00000100060	MFNG	-0.285445	0.890199	-1.92987	0.0546295	0.132246	-4.67287
ENSG00000100075	SLC25A1	-0.316577	0.544515	-2.55542	0.0111329	0.0409386	-3.27742
ENSG00000100077	GRK3	-0.0035605	0.502058	-0.0287841	0.977057	0.985567	-6.39771
ENSG00000100083	GGA1	-0.152848	3.29926	-1.57302	0.116841	0.228165	-5.42846
ENSG00000100084	HIRA	0.195879	0.0483307	1.46229	0.14478	0.266945	-5.25284
ENSG00000100092	SH3BP1	0.230561	2.10714	2.12912	0.0341143	0.0935955	-4.37572
ENSG00000100097	LGALS1	-0.0727539	5.43907	-0.519159	0.604059	0.722961	-6.50371
ENSG00000100099	HPS4	-0.092858	0.431977	-0.901308	0.368197	0.515752	-5.99962
ENSG00000100100	PIK3IP1	0.244219	2.07808	2.12119	0.0347812	0.0951338	-4.38875
ENSG00000100106	TRIOBP	0.176743	1.96816	2.21688	0.0274322	0.0797148	-4.18175
ENSG00000100109	TFIP11	-0.0302669	1.94469	-0.319528	0.749563	0.838203	-6.53396
ENSG00000100121	GGTLC2	0.311986	0.846745	1.49333	0.136473	0.255406	-5.35492
ENSG00000100124	ANKRD54	-0.200823	0.0719685	-1.34436	0.179915	0.310118	-5.46049
ENSG00000100129	EIF3L	-0.0998297	2.23975	-0.832754	0.405691	0.551915	-6.26479
ENSG00000100138	SNU13	-0.0639127	1.31666	-0.481235	0.630724	0.744823	-6.40897
ENSG00000100139	MICALL1	-0.0434944	1.06433	-0.41267	0.680163	0.785123	-6.41209
ENSG00000100142	POLR2F	-0.266346	1.64426	-2.14827	0.0325472	0.0902013	-4.31738
ENSG00000100150	DEPDC5	0.0592969	1.29028	0.489439	0.624913	0.739824	-6.39486
ENSG00000100151	PICK1	-0.4383	-0.0285292	-2.929	0.00367929	0.017737	-2.22425
ENSG00000100162	CENPM	-0.522332	-0.319151	-2.40926	0.0166283	0.0548817	-3.48866
ENSG00000100201	DDX17	0.108985	4.7361	1.64857	0.100354	0.204491	-5.31237
ENSG00000100207	TCF20	-0.0302041	0.654408	-0.287009	0.774317	0.855294	-6.39009
ENSG00000100211	CBY1	-0.762963	-0.13181	-4.5409	8.31938e-06	0.000158917	3.33201
ENSG00000100216	TOMM22	-0.383436	0.258331	-3.40985	0.000745305	0.00543868	-0.829621
ENSG00000100219	XBP1	-0.07943	3.72083	-0.67098	0.502784	0.638096	-6.42634
ENSG00000100220	RTCB	0.329493	1.3222	2.06457	0.0398814	0.105168	-4.42596
ENSG00000100221	JOSD1	-0.222448	3.22002	-1.7645	0.0787351	0.171097	-5.11569
ENSG00000100225	FBXO7	0.0629015	1.61934	0.539973	0.589643	0.711416	-6.40944
ENSG00000100226	GTPBP1	0.256661	5.30911	2.01904	0.0444324	0.113993	-4.64435
ENSG00000100227	POLDIP3	0.0237476	1.48496	0.23726	0.812628	0.880612	-6.51376
ENSG00000100239	PPP6R2	0.00836082	1.5769	0.102762	0.918225	0.948925	-6.54597
ENSG00000100241	SBF1	-0.203692	1.76158	-2.20184	0.0284896	0.0820007	-4.21149
ENSG00000100242	SUN2	0.227012	5.24289	2.35021	0.0194548	0.0616989	-3.94332
ENSG00000100243	CYB5R3	-0.205326	2.46815	-2.1184	0.0350191	0.0956515	-4.42447
ENSG00000100258	LMF2	0.237864	1.56843	2.21886	0.0272952	0.0794273	-4.1407
ENSG00000100263	RHBDD3	-0.118285	-0.222339	-0.878035	0.380675	0.527947	-5.89695
ENSG00000100266	PACSIN2	-0.0361632	4.0122	-0.429386	0.667972	0.775245	-6.55851
ENSG00000100280	AP1B1	0.0811779	2.01532	0.861839	0.389511	0.53614	-6.21925
ENSG00000100281	HMGXB4	-0.0281815	0.443592	-0.277245	0.781796	0.860465	-6.35772
ENSG00000100284	TOM1	0.0602082	5.46613	0.615329	0.538836	0.668379	-6.44985
ENSG00000100288	CHKB	0.269771	2.13912	2.52273	0.0121972	0.0440461	-3.48953
ENSG00000100292	HMOX1	-0.322703	4.25289	-2.02276	0.0440452	0.113207	-4.6438
ENSG00000100296	THOC5	0.285735	1.7816	2.74642	0.00641397	0.0269021	-2.89906
ENSG00000100297	MCM5	0.0772993	0.886083	0.576615	0.564661	0.689521	-6.29882
ENSG00000100299	ARSA	0.00665064	1.39745	0.0688602	0.94515	0.967268	-6.53021
ENSG00000100300	TSPO	-0.00186776	4.36062	-0.0132129	0.989467	0.994214	-6.64889
ENSG00000100304	TTLL12	0.0307085	-0.083129	0.274431	0.783955	0.862106	-6.24705
ENSG00000100307	CBX7	-0.334181	-0.292182	-2.45406	0.0147326	0.0505182	-3.38342
ENSG00000100316	RPL3	-0.32582	4.64443	-2.78668	0.00568798	0.0245581	-2.86652
ENSG00000100319	ZMAT5	-0.0592817	-0.0812998	-0.536254	0.592208	0.713199	-6.15675
ENSG00000100325	ASCC2	-0.188565	2.27589	-1.63016	0.104188	0.209869	-5.30809
ENSG00000100330	MTMR3	0.19437	3.23077	1.85676	0.0643923	0.148537	-4.94955
ENSG00000100335	MIEF1	-0.484261	-0.0536106	-3.80005	0.000177392	0.00179102	0.509317
ENSG00000100336	APOL4	0.565208	0.620662	2.81422	0.00523504	0.0230473	-2.57409
ENSG00000100342	APOL1	0.837418	2.74135	4.27494	2.6219e-05	0.000398918	2.11345
ENSG00000100345	MYH9	0.0352943	5.76102	0.477635	0.633281	0.746679	-6.51904
ENSG00000100348	TXN2	-0.101883	1.17545	-0.960756	0.337501	0.484804	-6.06286
ENSG00000100353	EIF3D	-0.0249687	2.58391	-0.295753	0.767638	0.85078	-6.57948
ENSG00000100354	TNRC6B	-0.0532889	1.97723	-0.50453	0.614284	0.731199	-6.46338
ENSG00000100359	SGSM3	0.0755212	1.21676	0.56807	0.570441	0.69472	-6.34747
ENSG00000100360	IFT27	-0.476281	-0.54201	-2.82644	0.00504477	0.0223697	-2.41957
ENSG00000100364	KIAA0930	0.0317503	2.5656	0.284298	0.776391	0.85646	-6.57679
ENSG00000100365	NCF4	0.379866	4.1351	3.43921	0.000671887	0.0050453	-0.932879
ENSG00000100368	CSF2RB	0.81257	5.28236	6.32383	1.00092e-09	9.0395e-08	11.784
ENSG00000100376	FAM118A	-0.0430209	1.26063	-0.303595	0.761661	0.846061	-6.47666
ENSG00000100379	KCTD17	-0.151444	0.0529487	-0.951211	0.342315	0.489362	-5.88281
ENSG00000100380	ST13	-0.287301	2.85787	-2.82505	0.00506604	0.0224135	-2.75461
ENSG00000100385	IL2RB	0.655716	0.490569	3.04978	0.00250866	0.0132841	-1.89666
ENSG00000100387	RBX1	0.0311143	0.758707	0.240876	0.809827	0.878526	-6.41256
ENSG00000100393	EP300	0.324839	3.46255	3.51599	0.000510617	0.00410327	-0.675482
ENSG00000100401	RANGAP1	-0.101619	0.915384	-0.902862	0.367372	0.514865	-6.0809
ENSG00000100410	PHF5A	-0.0746542	0.724989	-0.599711	0.549182	0.676784	-6.26867
ENSG00000100412	ACO2	-0.368032	1.45317	-3.36702	0.000865899	0.00610158	-1.08995
ENSG00000100413	POLR3H	-0.452648	-0.252199	-3.15199	0.00179706	0.0102971	-1.5548
ENSG00000100416	TRMU	-0.482175	0.491138	-4.12869	4.8147e-05	0.000645235	1.65609
ENSG00000100418	DESI1	-0.161399	0.900572	-1.272	0.204425	0.338325	-5.68845
ENSG00000100422	CERK	-0.175811	1.54169	-1.45916	0.145638	0.268074	-5.5141
ENSG00000100425	BRD1	-0.184831	1.07841	-1.78549	0.0752604	0.165392	-4.94824
ENSG00000100429	HDAC10	0.0984276	0.948741	0.883002	0.37799	0.525037	-6.08669
ENSG00000100439	ABHD4	-0.370301	0.873995	-2.42804	0.0158089	0.052933	-3.62785
ENSG00000100441	KHNYN	-0.023288	1.71871	-0.266238	0.790251	0.866381	-6.53079
ENSG00000100445	SDR39U1	-0.126027	-0.231486	-0.718394	0.473111	0.612669	-6.02193
ENSG00000100453	GZMB	1.82176	1.99255	5.89707	1.05998e-08	6.28581e-07	9.57038
ENSG00000100461	RBM23	0.0725587	3.84461	0.721795	0.471021	0.6109	-6.39178
ENSG00000100462	PRMT5	0.051702	1.45659	0.404652	0.686041	0.790147	-6.45711
ENSG00000100478	AP4S1	-0.179841	0.575731	-1.52114	0.129349	0.245719	-5.2999
ENSG00000100485	SOS2	0.228837	1.96186	2.16882	0.0309354	0.0869833	-4.28162
ENSG00000100490	CDKL1	-1.06294	0.776904	-4.12943	4.80024e-05	0.000644939	1.61747
ENSG00000100503	NIN	0.26994	3.22651	2.67646	0.0078776	0.031472	-3.14954
ENSG00000100504	PYGL	0.136259	3.67459	0.962842	0.336455	0.483733	-6.1899
ENSG00000100519	PSMC6	0.034159	2.13774	0.385924	0.699845	0.799738	-6.52422
ENSG00000100523	DDHD1	-0.0578288	0.342194	-0.416942	0.677039	0.782893	-6.29016
ENSG00000100528	CNIH1	0.0218418	1.1186	0.151372	0.879791	0.925878	-6.48844
ENSG00000100554	ATP6V1D	-0.0905788	2.88785	-1.06025	0.289941	0.435222	-6.08163
ENSG00000100564	PIGH	-0.154063	1.15194	-1.50466	0.133536	0.251344	-5.40473
ENSG00000100567	PSMA3	0.374049	3.1447	3.75614	0.000209777	0.00203653	0.152831
ENSG00000100568	VTI1B	-0.263603	1.06593	-2.27365	0.0237415	0.0718008	-3.99219
ENSG00000100578	KIAA0586	-0.130878	0.292267	-0.966865	0.334443	0.481888	-5.91643
ENSG00000100591	AHSA1	-0.165319	2.63808	-1.27472	0.20346	0.337523	-5.8284
ENSG00000100592	DAAM1	-0.552989	0.0635841	-3.64183	0.000322246	0.00286816	-0.0466441
ENSG00000100596	SPTLC2	0.599614	2.46401	3.91014	0.000115713	0.00128709	0.734032
ENSG00000100599	AL159141.1	0.0824362	3.19894	0.790623	0.429831	0.57272	-6.33166
ENSG00000100600	LGMN	0.190794	3.35465	1.07489	0.283345	0.42793	-6.07188
ENSG00000100603	SNW1	0.16701	1.86953	1.77335	0.0772541	0.168623	-5.03376
ENSG00000100605	ITPK1	0.0988672	2.84328	0.981684	0.3271	0.473944	-6.15511
ENSG00000100612	DHRS7	0.208889	2.66094	1.97026	0.0497903	0.123991	-4.72004
ENSG00000100614	PPM1A	0.304674	2.13031	3.18505	0.00161024	0.00947561	-1.68136
ENSG00000100632	ERH	0.0236464	2.10462	0.172113	0.863473	0.914965	-6.57817
ENSG00000100644	HIF1A	0.244225	5.9809	2.21801	0.0273537	0.0795714	-4.22361
ENSG00000100647	SUSD6	0.265797	4.23069	2.49881	0.0130325	0.0462645	-3.60193
ENSG00000100650	SRSF5	-0.0746473	4.19926	-0.844523	0.399096	0.545426	-6.29796
ENSG00000100664	EIF5	-0.166464	4.14778	-2.18193	0.0299431	0.0851414	-4.31982
ENSG00000100697	DICER1	0.366339	2.72722	3.76129	0.000205708	0.00200692	0.182027
ENSG00000100711	ZFYVE21	-0.536471	0.0562151	-3.81315	0.000168684	0.00172599	0.544104
ENSG00000100714	MTHFD1	-0.283655	0.455948	-1.92441	0.0553133	0.133333	-4.61523
ENSG00000100722	ZC3H14	-0.0805849	0.985274	-0.630076	0.529157	0.66054	-6.28971
ENSG00000100726	TELO2	-0.156888	0.152877	-1.20386	0.229659	0.367902	-5.64777
ENSG00000100731	PCNX1	0.071825	4.19103	0.737765	0.461273	0.602225	-6.3812
ENSG00000100744	GSKIP	0.246789	0.185031	1.82013	0.0698034	0.156954	-4.71675
ENSG00000100749	VRK1	0.0564703	0.63816	0.407588	0.683886	0.788311	-6.3382
ENSG00000100764	PSMC1	-0.0422738	2.69691	-0.45155	0.651941	0.761836	-6.52616
ENSG00000100767	PAPLN	-0.221125	-0.0590625	-1.6844	0.0932145	0.194079	-4.9381
ENSG00000100796	PPP4R3A	0.250966	2.29648	2.80753	0.0053419	0.023361	-2.77155
ENSG00000100802	C14orf93	0.463929	-0.0285041	2.77119	0.00595799	0.0254283	-2.59376
ENSG00000100804	PSMB5	-0.0182155	0.771543	-0.122908	0.902268	0.939838	-6.4412
ENSG00000100811	YY1	0.111018	1.80582	1.14587	0.252826	0.394549	-5.92623
ENSG00000100813	ACIN1	0.199603	3.52219	2.67111	0.00800111	0.0318749	-3.16868
ENSG00000100815	TRIP11	0.270169	0.438259	2.28568	0.023018	0.0701732	-3.84533
ENSG00000100823	APEX1	-0.190801	0.755045	-1.36086	0.174647	0.303888	-5.55094
ENSG00000100836	PABPN1	-0.0298711	2.40124	-0.370622	0.711198	0.808315	-6.54608
ENSG00000100852	ARHGAP5	-0.312886	0.217256	-2.21641	0.0274647	0.0797529	-3.99549
ENSG00000100865	CINP	-0.0840544	0.734432	-0.817856	0.414132	0.558531	-6.12134
ENSG00000100883	SRP54	0.286399	2.232	2.94346	0.00351665	0.0171546	-2.39446
ENSG00000100888	CHD8	0.127662	2.114	1.7884	0.0747883	0.164886	-5.02778
ENSG00000100889	PCK2	-0.189815	0.964455	-1.43175	0.153328	0.277699	-5.48724
ENSG00000100890	PRORP	-0.0851465	0.281443	-0.713591	0.476073	0.615263	-6.11837
ENSG00000100897	DCAF11	0.195636	2.15513	2.33033	0.0204968	0.0641356	-3.94468
ENSG00000100902	PSMA6	0.136359	3.80467	1.43597	0.152122	0.276121	-5.63427
ENSG00000100906	NFKBIA	0.235573	8.02306	1.81655	0.0703509	0.157753	-4.96936
ENSG00000100908	EMC9	0.065133	-0.332333	0.416026	0.677709	0.783392	-6.1453
ENSG00000100911	PSME2	0.526914	3.71019	3.72694	0.000234326	0.00223735	0.0428806
ENSG00000100918	REC8	0.466154	2.95214	3.80372	0.00017491	0.00177096	0.327499
ENSG00000100926	TM9SF1	0.0133493	1.42909	0.127579	0.898573	0.938025	-6.52515
ENSG00000100934	SEC23A	-0.225524	1.65705	-2.20585	0.0282038	0.0813988	-4.19526
ENSG00000100938	GMPR2	0.232123	3.2537	2.61857	0.00930898	0.0358099	-3.2978
ENSG00000100941	PNN	-0.068803	1.6451	-0.629026	0.529843	0.661062	-6.36996
ENSG00000100949	RABGGTA	-0.152117	1.14948	-1.38822	0.166171	0.293573	-5.57106
ENSG00000100979	PLTP	-0.2615	0.914526	-1.43138	0.153434	0.277699	-5.47962
ENSG00000100982	PCIF1	0.156912	1.1198	1.67786	0.0944864	0.196105	-5.11591
ENSG00000100983	GSS	-0.175247	0.896308	-1.55616	0.120796	0.233939	-5.29382
ENSG00000100985	MMP9	0.656413	3.21855	2.72746	0.00678429	0.0280607	-3.01058
ENSG00000100991	TRPC4AP	0.259919	2.24053	2.87751	0.00431578	0.0200007	-2.57821
ENSG00000100994	PYGB	-0.232038	0.435839	-1.86678	0.0629732	0.146067	-4.71483
ENSG00000100997	ABHD12	-0.343086	1.86172	-2.74986	0.00634891	0.0266943	-2.91406
ENSG00000101000	PROCR	-0.490915	0.0966707	-2.59827	0.00986382	0.0373747	-3.11596
ENSG00000101017	CD40	0.297163	1.40181	2.07014	0.0393524	0.103968	-4.43259
ENSG00000101019	UQCC1	-0.304167	0.269068	-2.06315	0.040017	0.10541	-4.32218
ENSG00000101040	ZMYND8	-0.190913	0.515082	-1.49077	0.137143	0.256296	-5.33086
ENSG00000101052	IFT52	-0.209816	-0.270853	-1.26159	0.208143	0.342477	-5.50222
ENSG00000101084	RAB5IF	0.323207	3.83823	3.34992	0.000918958	0.00635538	-1.21891
ENSG00000101104	PABPC1L	0.11039	1.29444	1.00574	0.315407	0.462034	-6.01911
ENSG00000101109	STK4	0.289249	3.45455	2.83231	0.00495561	0.0220937	-2.74113
ENSG00000101126	ADNP	0.281741	0.843006	2.4529	0.0147789	0.0505851	-3.52623
ENSG00000101138	CSTF1	0.0386107	0.610442	0.311137	0.755927	0.842258	-6.37346
ENSG00000101146	RAE1	0.198008	0.103968	1.71033	0.0883083	0.186307	-4.89746
ENSG00000101150	TPD52L2	0.0902743	3.70488	1.01223	0.312301	0.459055	-6.14281
ENSG00000101152	DNAJC5	0.16045	2.62722	1.65742	0.0985498	0.201815	-5.2735
ENSG00000101158	NELFCD	0.00800405	1.51669	0.0947008	0.92462	0.953085	-6.54105
ENSG00000101160	CTSZ	-0.078575	5.06686	-0.610523	0.542009	0.670294	-6.45853
ENSG00000101161	PRPF6	-0.0464184	0.984229	-0.506605	0.61283	0.730085	-6.35657
ENSG00000101166	PRELID3B	-0.208992	1.28972	-1.93324	0.0542112	0.131702	-4.7068
ENSG00000101181	MTG2	-0.103709	1.14797	-1.02109	0.308092	0.454169	-6.00118
ENSG00000101182	PSMA7	-0.163482	3.67265	-1.67979	0.0941094	0.195694	-5.26279
ENSG00000101187	SLCO4A1	0.437973	2.65015	2.33299	0.0203548	0.0638536	-3.95998
ENSG00000101191	DIDO1	0.127195	0.895817	1.59034	0.112882	0.222821	-5.22516
ENSG00000101193	GID8	-0.0761028	0.0990895	-0.593979	0.553004	0.679707	-6.15936
ENSG00000101199	ARFGAP1	-0.0460828	1.91862	-0.515921	0.606315	0.724516	-6.4527
ENSG00000101224	CDC25B	0.229949	-0.0965087	1.43926	0.151189	0.275	-5.26895
ENSG00000101236	RNF24	0.600886	2.86015	4.54378	8.21434e-06	0.000157934	3.19565
ENSG00000101246	ARFRP1	0.208623	1.20408	1.88968	0.0598296	0.141136	-4.75908
ENSG00000101255	TRIB3	0.449737	0.578903	2.69744	0.00740999	0.0299688	-2.87928
ENSG00000101265	RASSF2	0.513592	3.64172	3.77073	0.000198448	0.00194767	0.197581
ENSG00000101266	CSNK2A1	-0.340707	1.73017	-3.47928	0.000582579	0.00452084	-0.745184
ENSG00000101290	CDS2	0.416904	2.1771	3.6196	0.000349873	0.00305875	-0.284963
ENSG00000101294	HM13	0.247149	4.12201	2.65961	0.0082722	0.0326867	-3.20219
ENSG00000101307	SIRPB1	0.229216	3.92908	1.65662	0.0987125	0.202064	-5.30069
ENSG00000101310	SEC23B	0.0703947	1.94826	0.759506	0.448187	0.59086	-6.29797
ENSG00000101336	HCK	0.348958	5.38993	3.46987	0.000602485	0.00465037	-0.825821
ENSG00000101337	TM9SF4	-0.086057	2.06282	-0.823833	0.410733	0.555698	-6.26254
ENSG00000101342	TLDC2	1.12455	-0.0803606	4.55594	7.78392e-06	0.00015054	3.43301
ENSG00000101343	CRNKL1	0.361034	0.241501	2.98183	0.00311644	0.0156442	-2.06743
ENSG00000101347	SAMHD1	0.426556	4.40086	2.95494	0.00339221	0.0166631	-2.40638
ENSG00000101350	KIF3B	-0.0556228	0.321951	-0.525784	0.599453	0.71946	-6.23966
ENSG00000101361	NOP56	-0.0733617	1.74238	-0.615233	0.538899	0.668379	-6.38512
ENSG00000101363	MANBAL	-0.188478	0.166526	-1.66914	0.0962027	0.198578	-4.99775
ENSG00000101365	IDH3B	0.0337436	1.04209	0.32924	0.74222	0.832545	-6.42954
ENSG00000101367	MAPRE1	0.145846	2.94747	1.57729	0.115854	0.226851	-5.41103
ENSG00000101384	JAG1	0.0936563	0.725545	0.79041	0.429955	0.572808	-6.13137
ENSG00000101413	RPRD1B	-0.274015	1.25817	-2.57894	0.0104194	0.0388663	-3.30041
ENSG00000101421	CHMP4B	0.0959238	3.9773	1.05924	0.290399	0.43551	-6.09652
ENSG00000101425	BPI	0.0933107	-0.190544	0.505485	0.613615	0.730667	-6.13584
ENSG00000101439	CST3	0.0916648	4.96522	0.594364	0.552747	0.679476	-6.47055
ENSG00000101443	WFDC2	0.0361305	3.09772	0.109303	0.91304	0.946102	-6.63189
ENSG00000101444	AHCY	-0.395113	0.472687	-3.39371	0.000788778	0.00568013	-0.907816
ENSG00000101445	PPP1R16B	0.300362	-0.446478	1.45382	0.147111	0.270201	-5.16616
ENSG00000101457	DNTTIP1	0.161161	2.27194	1.42603	0.154969	0.279655	-5.60309
ENSG00000101460	MAP1LC3A	-0.270809	1.77906	-1.7091	0.088536	0.186587	-5.15115
ENSG00000101473	ACOT8	0.267547	-0.075052	2.07692	0.038718	0.102595	-4.18946
ENSG00000101474	APMAP	0.0522932	2.28506	0.416723	0.677199	0.782987	-6.51942
ENSG00000101493	ZNF516	0.218557	2.01654	1.88024	0.0611096	0.143211	-4.85348
ENSG00000101544	ADNP2	0.212571	1.31585	1.30955	0.191417	0.323797	-5.67285
ENSG00000101557	USP14	-0.208371	0.472156	-1.88136	0.0609565	0.142946	-4.69267
ENSG00000101558	VAPA	-0.0216639	4.05149	-0.244281	0.807191	0.877331	-6.62011
ENSG00000101577	LPIN2	0.293023	2.29508	2.45475	0.0147047	0.0504876	-3.66266
ENSG00000101596	SMCHD1	0.570535	5.03044	4.05529	6.49078e-05	0.000822333	1.23696
ENSG00000101608	MYL12A	0.548682	5.74162	6.09996	3.50312e-09	2.44573e-07	10.583
ENSG00000101654	RNMT	-0.0760124	0.739907	-0.601159	0.548219	0.675935	-6.27111
ENSG00000101665	SMAD7	-0.0178175	1.01506	-0.144745	0.885016	0.929083	-6.47964
ENSG00000101745	ANKRD12	0.147482	3.73427	1.53752	0.125292	0.240378	-5.48563
ENSG00000101751	POLI	0.00777617	0.339841	0.0555382	0.955749	0.973655	-6.36331
ENSG00000101773	RBBP8	-0.0420642	0.693817	-0.310189	0.756647	0.842488	-6.38777
ENSG00000101782	RIOK3	-0.0169543	2.60966	-0.182505	0.855318	0.909378	-6.6073
ENSG00000101843	PSMD10	-0.22582	0.822248	-1.79107	0.0743578	0.164231	-4.90609
ENSG00000101849	TBL1X	0.036448	2.0061	0.340676	0.733602	0.825993	-6.53195
ENSG00000101856	PGRMC1	0.0630046	0.0109245	0.418125	0.676175	0.782208	-6.21077
ENSG00000101882	NKAP	0.107083	0.397659	0.965237	0.335256	0.482495	-5.92205
ENSG00000101901	ALG13	0.0833007	1.71671	0.538944	0.590352	0.71201	-6.41694
ENSG00000101911	PRPS2	-0.0597536	0.2755	-0.415107	0.678381	0.7838	-6.27543
ENSG00000101916	TLR8	0.954646	2.3188	5.6656	3.62487e-08	1.74065e-06	8.36991
ENSG00000101940	WDR13	-0.050546	2.0932	-0.458267	0.647115	0.758357	-6.49356
ENSG00000101966	XIAP	0.431595	2.21288	3.19869	0.00153854	0.00923499	-1.64254
ENSG00000101972	STAG2	0.011399	3.32028	0.119814	0.904716	0.941043	-6.63616
ENSG00000101974	ATP11C	0.569602	0.383064	4.08504	5.75362e-05	0.000746226	1.5409
ENSG00000101986	ABCD1	0.371489	1.15995	3.15283	0.00179205	0.0102803	-1.69306
ENSG00000102007	PLP2	0.331711	3.7107	2.63766	0.0088131	0.0343861	-3.25492
ENSG00000102030	NAA10	0.21016	1.80494	1.96488	0.0504137	0.125258	-4.6795
ENSG00000102032	RENBP	0.255913	2.98251	1.98468	0.048153	0.1211	-4.70376
ENSG00000102034	ELF4	0.653433	2.42321	6.28492	1.24728e-09	1.07704e-07	11.5875
ENSG00000102054	RBBP7	-0.143632	0.996279	-1.27659	0.202802	0.337055	-5.69184
ENSG00000102081	FMR1	0.241857	3.04237	2.20173	0.028497	0.0820007	-4.26399
ENSG00000102096	PIM2	0.398094	3.24892	2.74987	0.00634858	0.0266943	-2.95742
ENSG00000102100	SLC35A2	0.0836898	0.909806	0.612514	0.540693	0.669508	-6.28516
ENSG00000102103	PQBP1	0.0922381	1.39622	0.832748	0.405694	0.551915	-6.19234
ENSG00000102119	EMD	-0.348376	2.42952	-2.63982	0.00875856	0.034214	-3.22887
ENSG00000102125	TAZ	0.0261488	0.904122	0.233411	0.815612	0.882683	-6.44141
ENSG00000102144	PGK1	-0.0407314	4.50218	-0.45985	0.645979	0.757398	-6.54393
ENSG00000102158	MAGT1	-0.105567	1.52341	-1.14846	0.251754	0.393188	-5.90539
ENSG00000102172	SMS	-0.321166	1.62453	-2.88397	0.0042308	0.0197278	-2.53668
ENSG00000102181	CD99L2	-0.227362	0.39178	-2.12324	0.034608	0.0948445	-4.21572
ENSG00000102189	EEA1	-0.206523	0.177785	-1.85824	0.0641807	0.148274	-4.68055
ENSG00000102218	RP2	0.420324	2.08462	3.95432	9.72128e-05	0.00111664	0.907573
ENSG00000102225	CDK16	-0.0482839	1.95349	-0.448491	0.654144	0.763927	-6.4874
ENSG00000102226	USP11	-0.048979	1.08619	-0.418081	0.676207	0.782208	-6.40928
ENSG00000102265	TIMP1	0.14571	6.84526	0.913904	0.361551	0.508371	-6.19885
ENSG00000102316	MAGED2	0.0728562	1.05834	0.533486	0.594119	0.715092	-6.34755
ENSG00000102317	RBM3	-0.0606483	2.61952	-0.492583	0.622692	0.738261	-6.50408
ENSG00000102390	PBDC1	-0.2781	0.0551146	-1.78486	0.0753627	0.165553	-4.79707
ENSG00000102393	GLA	0.183658	3.15659	1.34922	0.178352	0.308395	-5.74341
ENSG00000102401	ARMCX3	0.100281	1.63398	0.966462	0.334644	0.481895	-6.0971
ENSG00000102445	RUBCNL	-0.246946	2.79039	-1.30534	0.192846	0.325511	-5.79546
ENSG00000102524	TNFSF13B	1.25398	4.06875	6.89781	3.49545e-11	6.90341e-09	15.0163
ENSG00000102531	FNDC3A	0.321503	2.49324	3.31083	0.00105179	0.0070698	-1.31262
ENSG00000102543	CDADC1	0.231257	0.744712	1.52423	0.128576	0.244769	-5.29366
ENSG00000102547	CAB39L	0.151104	-0.238486	0.854306	0.393663	0.540628	-5.88209
ENSG00000102554	KLF5	-0.0847642	1.48166	-0.412405	0.680357	0.785255	-6.46394
ENSG00000102572	STK24	0.258706	2.98525	2.91256	0.00387252	0.018416	-2.51025
ENSG00000102575	ACP5	-0.60024	2.63747	-3.12083	0.00199125	0.0111248	-1.90915
ENSG00000102580	DNAJC3	0.0848095	2.22913	0.795663	0.4269	0.569975	-6.29131
ENSG00000102595	UGGT2	-0.410724	0.147744	-2.60574	0.00965638	0.0368582	-3.10289
ENSG00000102606	ARHGEF7	0.0428629	1.537	0.459837	0.645989	0.757398	-6.4407
ENSG00000102699	PARP4	0.368929	2.46863	3.20288	0.00151712	0.00913984	-1.64272
ENSG00000102710	SUPT20H	0.094153	1.83761	0.907162	0.365099	0.512335	-6.16739
ENSG00000102755	FLT1	-0.146557	1.05707	-1.07543	0.283105	0.427698	-5.93687
ENSG00000102760	RGCC	-0.41316	3.111	-2.17247	0.0306563	0.0864246	-4.3315
ENSG00000102786	INTS6	0.245678	2.33853	2.44247	0.0152036	0.0515019	-3.69552
ENSG00000102794	ACOD1	1.727	1.95595	5.1931	3.97622e-07	1.3004e-05	6.12757
ENSG00000102796	DHRS12	0.0374299	0.90134	0.234635	0.814663	0.882141	-6.43925
ENSG00000102804	TSC22D1	-0.472814	1.3906	-3.24592	0.00131247	0.00824738	-1.46897
ENSG00000102805	CLN5	-0.341366	1.86073	-2.4564	0.0146389	0.0503162	-3.6491
ENSG00000102854	MSLN	0.0140342	-0.209838	0.0603842	0.951893	0.97113	-6.25651
ENSG00000102858	MGRN1	-0.0999594	3.22739	-1.23415	0.218179	0.354006	-5.89299
ENSG00000102871	TRADD	0.0791224	0.94621	0.687892	0.492089	0.628454	-6.24027
ENSG00000102879	CORO1A	0.729667	5.22446	6.23473	1.65424e-09	1.35703e-07	11.3007
ENSG00000102882	MAPK3	0.212407	2.38613	2.1786	0.0301929	0.0857032	-4.28751
ENSG00000102886	GDPD3	-0.0977405	-0.441755	-0.555289	0.579139	0.70184	-6.06378
ENSG00000102893	PHKB	-0.0362706	1.71405	-0.396549	0.692001	0.794039	-6.49079
ENSG00000102897	LYRM1	0.300917	2.47838	2.86142	0.00453443	0.020694	-2.63279
ENSG00000102898	NUTF2	-0.281088	1.16148	-1.97083	0.0497243	0.123858	-4.62489
ENSG00000102900	NUP93	-0.10637	1.06183	-0.877797	0.380804	0.527976	-6.11824
ENSG00000102901	CENPT	-0.231389	0.265382	-1.80915	0.0714964	0.159712	-4.7859
ENSG00000102908	NFAT5	0.106704	2.25035	1.29701	0.195691	0.329128	-5.77659
ENSG00000102910	LONP2	-0.0731657	0.44052	-0.71903	0.47272	0.612378	-6.14348
ENSG00000102921	N4BP1	0.542116	4.38944	3.93395	0.000105362	0.00118943	0.78264
ENSG00000102931	ARL2BP	-0.361193	0.234698	-2.03892	0.0423939	0.109938	-4.35785
ENSG00000102974	CTCF	-0.11495	0.868707	-1.48159	0.139571	0.259429	-5.39894
ENSG00000102978	POLR2C	-0.289631	1.17078	-3.17478	0.00166626	0.00972659	-1.65994
ENSG00000103005	USB1	0.345145	3.44027	3.78371	0.000188851	0.00187783	0.244868
ENSG00000103018	CYB5B	0.11032	0.642074	0.904047	0.366745	0.514205	-6.01334
ENSG00000103035	PSMD7	0.169658	2.03431	1.74099	0.0827803	0.177458	-5.09975
ENSG00000103042	SLC38A7	-0.0131713	0.556759	-0.0981962	0.921847	0.951521	-6.41565
ENSG00000103043	VAC14	-0.257029	1.82737	-2.21973	0.0272355	0.0792979	-4.17775
ENSG00000103047	TANGO6	-0.164691	0.266091	-0.947355	0.344272	0.491201	-5.93198
ENSG00000103051	COG4	0.138101	0.480472	1.18127	0.238495	0.378242	-5.70931
ENSG00000103056	SMPD3	-0.315086	-0.329817	-1.83452	0.0676349	0.153764	-4.64353
ENSG00000103064	SLC7A6	-0.109821	0.604334	-0.776998	0.437814	0.580215	-6.13166
ENSG00000103066	PLA2G15	-0.793669	0.744562	-5.62755	4.42134e-08	2.04336e-06	8.21081
ENSG00000103091	WDR59	-0.388699	1.23221	-2.71303	0.00707884	0.0289506	-2.9648
ENSG00000103111	MON1B	0.111487	2.04335	1.23747	0.216948	0.352473	-5.83734
ENSG00000103121	CMC2	0.199755	1.80221	1.397	0.163517	0.290599	-5.61319
ENSG00000103126	AXIN1	0.0228688	0.61872	0.241817	0.809098	0.878302	-6.38994
ENSG00000103145	HCFC1R1	-0.0564214	0.224972	-0.368908	0.712474	0.809043	-6.28555
ENSG00000103152	MPG	-0.03508	0.13916	-0.251637	0.801506	0.873467	-6.30239
ENSG00000103160	HSDL1	0.129044	0.729622	0.922555	0.357031	0.503454	-6.01423
ENSG00000103168	TAF1C	0.562373	1.70663	3.0457	0.00254183	0.0134093	-2.05228
ENSG00000103174	NAGPA	-0.213923	0.282241	-1.55277	0.121605	0.235136	-5.21112
ENSG00000103187	COTL1	0.292045	5.32085	3.17504	0.00166481	0.00972607	-1.75596
ENSG00000103194	USP10	0.101841	3.31723	0.870357	0.384849	0.531472	-6.26845
ENSG00000103196	CRISPLD2	0.312348	2.19438	2.43814	0.015383	0.0519485	-3.69621
ENSG00000103197	TSC2	-0.109921	2.48481	-1.0604	0.289872	0.435201	-6.06732
ENSG00000103222	ABCC1	0.00951733	1.71393	0.0971313	0.922691	0.951994	-6.55856
ENSG00000103226	NOMO3	-0.301605	1.26193	-1.77587	0.0768371	0.167915	-4.99091
ENSG00000103245	CIAO3	0.0360212	-0.0667136	0.246554	0.805433	0.875985	-6.25852
ENSG00000103248	MTHFSD	-0.120735	0.209642	-0.851169	0.3954	0.542106	-6.00991
ENSG00000103249	CLCN7	0.208289	4.11889	1.3426	0.180486	0.310939	-5.76211
ENSG00000103254	ANTKMT	-0.0453235	-0.504833	-0.269905	0.787432	0.864505	-6.15968
ENSG00000103257	SLC7A5	0.450179	3.31833	3.36785	0.000863389	0.00609699	-1.15399
ENSG00000103264	FBXO31	-0.590226	-0.383547	-3.39977	0.000772197	0.00559757	-0.784648
ENSG00000103266	STUB1	-0.123371	1.11453	-0.871868	0.384025	0.530797	-6.13278
ENSG00000103274	NUBP1	-0.22255	0.701303	-1.68001	0.0940667	0.195646	-5.07439
ENSG00000103275	UBE2I	0.0644319	2.17454	0.685182	0.493794	0.630141	-6.36751
ENSG00000103313	MEFV	0.731572	4.02763	5.19814	3.87926e-07	1.27292e-05	6.07507
ENSG00000103326	CAPN15	0.00764944	1.46593	0.0699003	0.944323	0.967015	-6.53667
ENSG00000103335	PIEZO1	-0.0997503	1.63483	-0.8292	0.407695	0.553489	-6.22245
ENSG00000103342	GSPT1	-0.234054	1.78715	-2.12285	0.0346405	0.094907	-4.37829
ENSG00000103351	CLUAP1	-0.519757	-0.257819	-2.89904	0.00403834	0.0190481	-2.27308
ENSG00000103353	UBFD1	-0.00994553	0.728129	-0.0680939	0.945759	0.967479	-6.44086
ENSG00000103363	ELOB	-0.030322	3.0785	-0.251958	0.801258	0.873413	-6.60717
ENSG00000103365	GGA2	-0.409895	2.01382	-3.43529	0.0006813	0.00509242	-0.905913
ENSG00000103381	CPPED1	0.457426	2.24016	3.5749	0.000412297	0.00349582	-0.436199
ENSG00000103415	HMOX2	-0.589453	0.902305	-5.11758	5.74603e-07	1.73509e-05	5.77441
ENSG00000103423	DNAJA3	-0.436186	0.327048	-2.97804	0.00315403	0.0157686	-2.14177
ENSG00000103429	BFAR	-0.00490658	1.42048	-0.0545925	0.956502	0.974206	-6.53691
ENSG00000103479	RBL2	-0.0620144	1.85148	-0.744628	0.457119	0.598638	-6.30597
ENSG00000103490	PYCARD	0.460971	3.00087	3.67684	0.000282869	0.00259756	-0.119075
ENSG00000103495	MAZ	0.00707115	2.10966	0.0555339	0.955753	0.973655	-6.5941
ENSG00000103496	STX4	0.0157776	4.23388	0.150978	0.880101	0.926106	-6.63805
ENSG00000103502	CDIPT	0.375795	1.2834	3.39136	0.000795304	0.00569794	-0.969514
ENSG00000103507	BCKDK	-0.0893684	2.0655	-0.866444	0.386986	0.533617	-6.22687
ENSG00000103510	KAT8	-0.310801	1.92349	-3.35004	0.000918553	0.00635538	-1.17437
ENSG00000103512	NOMO1	0.000225588	0.70663	0.00161054	0.998716	0.999571	-6.43809
ENSG00000103534	TMC5	-0.566018	0.332172	-2.49704	0.013096	0.0463896	-3.39415
ENSG00000103544	VPS35L	-0.206263	1.58147	-1.89765	0.0587668	0.139431	-4.80194
ENSG00000103549	RNF40	0.0324234	2.37529	0.35713	0.721262	0.816104	-6.54779
ENSG00000103569	AQP9	0.334487	7.18252	2.66956	0.00803706	0.0320052	-3.13664
ENSG00000103591	AAGAB	0.0997472	0.905982	0.90393	0.366807	0.51422	-6.06071
ENSG00000103642	LACTB	0.662429	2.70846	5.30927	2.23911e-07	8.07393e-06	6.61684
ENSG00000103653	CSK	0.351483	3.71361	3.81261	0.000169033	0.00172599	0.344905
ENSG00000103657	HERC1	0.191447	2.09166	1.97877	0.0488181	0.122343	-4.67542
ENSG00000103671	TRIP4	0.138079	1.11719	1.23459	0.218015	0.353972	-5.74308
ENSG00000103723	AP3B2	0.109568	0.589221	0.621838	0.534552	0.665083	-6.21901
ENSG00000103769	RAB11A	0.188712	3.40758	1.79006	0.0745203	0.164423	-5.07101
ENSG00000103811	CTSH	0.02811	4.20376	0.231585	0.817029	0.883536	-6.62306
ENSG00000103855	CD276	-0.95281	0.937953	-6.07479	4.02482e-09	2.69889e-07	10.486
ENSG00000103876	FAH	-0.51741	-0.110543	-3.0366	0.00261725	0.0136938	-1.91311
ENSG00000103888	CEMIP	0.695499	0.545761	3.2056	0.00150335	0.00908468	-1.44433
ENSG00000103932	RPAP1	-0.22124	-0.120438	-1.38011	0.168649	0.296144	-5.38143
ENSG00000103942	HOMER2	-0.433206	-0.531232	-2.57192	0.0106278	0.0394199	-3.07188
ENSG00000103966	EHD4	-0.131688	1.13819	-1.20213	0.230327	0.368433	-5.80055
ENSG00000103978	TMEM87A	0.00588402	1.3677	0.0612256	0.951223	0.970648	-6.52675
ENSG00000103994	ZNF106	0.0493192	2.39487	0.530115	0.596451	0.716604	-6.47311
ENSG00000103995	CEP152	-0.284051	-0.274588	-1.63479	0.103212	0.208543	-4.9804
ENSG00000104043	ATP8B4	0.325003	1.43469	2.08689	0.0377993	0.10073	-4.39876
ENSG00000104047	DTWD1	-0.274567	1.07052	-1.84859	0.065567	0.150207	-4.8408
ENSG00000104064	GABPB1	-0.0146687	1.24245	-0.123026	0.902175	0.939838	-6.50925
ENSG00000104067	TJP1	-0.55028	-0.230895	-3.25602	0.00126831	0.00806023	-1.24939
ENSG00000104081	BMF	-0.0279625	0.590876	-0.18042	0.856953	0.910605	-6.40711
ENSG00000104093	DMXL2	0.367319	3.99617	2.77296	0.00592657	0.0253343	-2.90531
ENSG00000104129	DNAJC17	-0.0860158	0.269943	-0.545702	0.585704	0.707774	-6.21723
ENSG00000104131	EIF3J	-0.151981	1.98976	-1.40631	0.160737	0.287084	-5.62268
ENSG00000104133	SPG11	0.209896	3.40182	2.56065	0.0109705	0.0404622	-3.44517
ENSG00000104142	VPS18	0.00534156	1.57053	0.0488172	0.9611	0.977282	-6.55409
ENSG00000104154	SLC30A4	0.238607	0.831032	1.63501	0.103167	0.208493	-5.14485
ENSG00000104164	BLOC1S6	-0.314436	3.5605	-1.90828	0.0573745	0.13692	-4.86242
ENSG00000104177	MYEF2	-0.364575	0.637792	-1.9434	0.0529666	0.129702	-4.60579
ENSG00000104205	SGK3	0.0554702	2.33749	0.464443	0.64269	0.754789	-6.50285
ENSG00000104219	ZDHHC2	-0.0430992	0.761551	-0.273569	0.784617	0.862509	-6.41506
ENSG00000104228	TRIM35	-0.261809	-0.497402	-1.69242	0.091674	0.19156	-4.85676
ENSG00000104267	CA2	-0.389282	-0.0964692	-2.21885	0.0272961	0.0794273	-3.94539
ENSG00000104299	INTS9	-0.0162089	0.348953	-0.117096	0.906868	0.942583	-6.37235
ENSG00000104312	RIPK2	0.469554	3.30335	3.54414	0.000461179	0.00378636	-0.577782
ENSG00000104320	NBN	0.723401	4.77274	4.93118	1.40043e-06	3.62786e-05	4.85329
ENSG00000104324	CPQ	-0.0710795	2.63615	-0.580946	0.561743	0.686846	-6.45878
ENSG00000104325	DECR1	0.0597886	3.06534	0.509812	0.610584	0.728026	-6.50886
ENSG00000104331	IMPAD1	-0.316461	0.542149	-2.30055	0.0221495	0.0680466	-3.86765
ENSG00000104343	UBE2W	0.240503	2.06742	2.30875	0.0216832	0.0669844	-3.9879
ENSG00000104365	IKBKB	-0.010553	2.9271	-0.143411	0.886068	0.929468	-6.62468
ENSG00000104375	STK3	0.171093	1.95101	1.42539	0.155155	0.279887	-5.58228
ENSG00000104388	RAB2A	-0.0413944	2.97024	-0.425398	0.670872	0.777773	-6.54688
ENSG00000104408	EIF3E	-0.100109	2.48486	-0.806921	0.420395	0.564348	-6.29886
ENSG00000104412	EMC2	0.251492	1.94469	1.89522	0.0590892	0.139995	-4.81991
ENSG00000104419	NDRG1	-0.147132	4.53731	-1.24897	0.212716	0.347768	-5.87967
ENSG00000104432	IL7	0.00696658	0.104474	0.0373289	0.970249	0.982132	-6.32551
ENSG00000104447	TRPS1	0.108478	1.76745	0.97691	0.329454	0.476233	-6.0962
ENSG00000104450	SPAG1	-0.0630848	0.0932748	-0.40734	0.684069	0.788429	-6.24239
ENSG00000104472	CHRAC1	0.00543376	0.464927	0.0440911	0.964863	0.979644	-6.39563
ENSG00000104490	NCALD	-0.525101	-0.101796	-2.33699	0.0201421	0.0633277	-3.69264
ENSG00000104497	SNX16	0.261593	0.199415	2.02526	0.0437861	0.112747	-4.35344
ENSG00000104517	UBR5	0.1081	2.11123	1.32463	0.186371	0.317301	-5.73145
ENSG00000104518	GSDMD	0.492327	2.88227	4.75995	3.10366e-06	7.00743e-05	4.11398
ENSG00000104522	TSTA3	-0.0130487	0.986127	-0.106973	0.914886	0.947118	-6.47693
ENSG00000104529	EEF1D	-0.0829381	4.9853	-1.10901	0.268376	0.41228	-6.03764
ENSG00000104549	SQLE	-0.172866	0.389779	-1.23468	0.217981	0.353972	-5.65264
ENSG00000104611	SH2D4A	-0.388338	-0.0414795	-2.43836	0.0153739	0.0519485	-3.46033
ENSG00000104613	INTS10	-0.119043	1.70826	-1.02247	0.307439	0.453485	-6.05662
ENSG00000104626	ERI1	0.198951	1.98773	1.48959	0.137453	0.256753	-5.49335
ENSG00000104660	LEPROTL1	-0.00363026	1.76669	-0.0302367	0.9759	0.985005	-6.56952
ENSG00000104671	DCTN6	-0.246895	0.74596	-2.11193	0.0355751	0.0965539	-4.29237
ENSG00000104687	GSR	0.0407946	1.88622	0.382	0.70275	0.801515	-6.50713
ENSG00000104689	TNFRSF10A	0.0878688	0.94674	0.686078	0.49323	0.629584	-6.24108
ENSG00000104695	PPP2CB	-0.276006	2.04668	-2.86458	0.00449063	0.0205704	-2.61611
ENSG00000104714	ERICH1	0.149687	2.85131	1.26185	0.208051	0.342477	-5.84657
ENSG00000104731	KLHDC4	-0.158258	0.64789	-1.04979	0.294718	0.439576	-5.90024
ENSG00000104738	MCM4	0.000197752	0.673649	0.00108721	0.999133	0.999641	-6.42457
ENSG00000104756	KCTD9	-0.153619	0.905675	-1.17834	0.23966	0.379478	-5.79718
ENSG00000104763	ASAH1	-0.0165317	5.27505	-0.165886	0.868366	0.918535	-6.62568
ENSG00000104765	BNIP3L	0.0829711	2.44137	0.702609	0.482881	0.621045	-6.3718
ENSG00000104774	MAN2B1	-0.0772184	3.31832	-0.791932	0.429068	0.572139	-6.33465
ENSG00000104783	KCNN4	0.175131	1.5172	1.2634	0.207493	0.341908	-5.75461
ENSG00000104804	TULP2	0.210481	1.65362	0.774898	0.439052	0.581465	-6.26151
ENSG00000104805	NUCB1	0.251864	4.32322	2.48761	0.0134408	0.0473723	-3.62907
ENSG00000104812	GYS1	-0.118835	1.46055	-0.996977	0.319633	0.466075	-6.06232
ENSG00000104814	MAP4K1	-0.0510102	0.361204	-0.265736	0.790638	0.866611	-6.34123
ENSG00000104823	ECH1	-0.466686	2.09563	-4.05136	6.59477e-05	0.000831228	1.25016
ENSG00000104824	HNRNPL	0.0581506	3.34449	0.686954	0.492678	0.629125	-6.41052
ENSG00000104825	NFKBIB	0.147289	1.79769	1.5128	0.131455	0.248615	-5.44737
ENSG00000104852	SNRNP70	-0.175578	2.70497	-1.7433	0.0823745	0.176858	-5.1389
ENSG00000104853	CLPTM1	-0.158758	2.0937	-1.91047	0.05709	0.136439	-4.81197
ENSG00000104856	RELB	0.153384	3.31905	1.43711	0.1518	0.275755	-5.62665
ENSG00000104859	CLASRP	0.323087	2.5811	3.48076	0.000579505	0.00450248	-0.77014
ENSG00000104866	PPP1R37	-0.291306	0.173184	-1.93973	0.0534134	0.130342	-4.54031
ENSG00000104870	FCGRT	-0.162872	3.64023	-1.55969	0.11996	0.232687	-5.45263
ENSG00000104872	PIH1D1	-0.0497265	0.931747	-0.353699	0.72383	0.817975	-6.42067
ENSG00000104880	ARHGEF18	-0.00299301	0.715898	-0.0258711	0.979378	0.987504	-6.44399
ENSG00000104885	DOT1L	-0.191448	2.99349	-1.56288	0.119206	0.231589	-5.43862
ENSG00000104886	PLEKHJ1	0.0221523	1.4314	0.198818	0.842549	0.900549	-6.51971
ENSG00000104894	CD37	0.56628	4.93732	5.62192	4.55292e-08	2.0846e-06	8.12028
ENSG00000104897	SF3A2	-0.147835	1.31884	-1.38657	0.166672	0.293983	-5.58894
ENSG00000104903	LYL1	0.213631	1.14378	1.71909	0.0867	0.18378	-5.04656
ENSG00000104904	OAZ1	0.0546823	6.53092	0.779602	0.436281	0.578808	-6.31624
ENSG00000104907	TRMT1	-0.310112	0.190652	-1.99171	0.0473705	0.119752	-4.45197
ENSG00000104915	STX10	0.451327	2.03044	3.90262	0.000119175	0.0013144	0.724172
ENSG00000104918	RETN	0.233341	2.37649	0.95649	0.339647	0.486991	-6.14764
ENSG00000104936	DMPK	-0.561761	-0.346545	-3.23931	0.00134213	0.00836199	-1.2909
ENSG00000104946	TBC1D17	0.394427	1.66863	3.41384	0.000734911	0.00539321	-0.930271
ENSG00000104951	IL4I1	1.02703	2.42266	5.51004	8.11407e-08	3.37025e-06	7.59889
ENSG00000104957	CCDC130	-0.0927847	1.19749	-1.00073	0.317816	0.464044	-6.0247
ENSG00000104960	PTOV1	-0.0300588	1.90883	-0.294591	0.768524	0.851435	-6.53933
ENSG00000104964	TLE5	-0.264954	3.21899	-1.75876	0.0797065	0.172712	-5.12448
ENSG00000104969	SGTA	0.0192585	1.67361	0.219258	0.826608	0.889985	-6.53698
ENSG00000104972	LILRB1	0.691366	3.563	4.13703	4.6529e-05	0.000628301	1.55304
ENSG00000104973	MED25	0.0834276	2.30993	0.933219	0.351508	0.498372	-6.17747
ENSG00000104974	LILRA1	0.865424	1.42116	5.18387	4.16012e-07	1.35156e-05	6.08607
ENSG00000104976	SNAPC2	-0.0277385	-0.0547725	-0.185085	0.853296	0.907895	-6.2847
ENSG00000104979	C19orf53	-0.229665	1.62721	-1.91263	0.056812	0.136006	-4.77551
ENSG00000104980	TIMM44	-0.328582	0.517154	-2.39944	0.0170716	0.05585	-3.63995
ENSG00000104983	CCDC61	-0.26454	-0.626013	-1.64049	0.102023	0.20695	-4.90336
ENSG00000104998	IL27RA	0.169515	-0.0790014	1.53146	0.12678	0.242362	-5.14472
ENSG00000105053	VRK3	-0.08485	2.38475	-1.13973	0.255369	0.397573	-5.97542
ENSG00000105058	FAM32A	0.306443	1.84408	2.82556	0.00505823	0.0224135	-2.69141
ENSG00000105063	PPP6R1	0.0418894	2.62476	0.514406	0.607373	0.72534	-6.49195
ENSG00000105085	MED26	-0.176678	0.00864889	-1.28853	0.198621	0.331959	-5.51948
ENSG00000105122	RASAL3	0.415258	1.6885	2.97839	0.00315061	0.0157594	-2.25245
ENSG00000105127	AKAP8	0.053344	0.524342	0.524168	0.600575	0.72045	-6.27248
ENSG00000105135	ILVBL	-0.218371	-0.11409	-1.46681	0.143547	0.265367	-5.25707
ENSG00000105171	POP4	0.0718202	1.10689	0.567045	0.571136	0.695223	-6.33434
ENSG00000105176	URI1	0.0591796	0.712806	0.389537	0.697174	0.797835	-6.36266
ENSG00000105185	PDCD5	-0.367753	0.82051	-2.17576	0.0304063	0.0860414	-4.17889
ENSG00000105186	ANKRD27	0.0550182	0.545864	0.510312	0.610233	0.727873	-6.27955
ENSG00000105193	RPS16	0.0255105	5.19529	0.213587	0.831024	0.893372	-6.61874
ENSG00000105197	TIMM50	-0.531247	1.19689	-4.05334	6.54216e-05	0.000827777	1.30681
ENSG00000105202	FBL	-0.252075	1.42144	-1.86287	0.0635247	0.147104	-4.85252
ENSG00000105220	GPI	-0.348678	2.90554	-3.14927	0.00181324	0.0103535	-1.8304
ENSG00000105221	AKT2	0.117456	2.93806	1.48935	0.137518	0.256816	-5.54287
ENSG00000105223	PLD3	-0.39578	2.82491	-3.19301	0.00156801	0.00934915	-1.69617
ENSG00000105229	PIAS4	-0.00490272	1.32899	-0.0373165	0.970259	0.982132	-6.52919
ENSG00000105245	NUMBL	-0.495882	-0.244093	-3.22695	0.00139927	0.00862923	-1.3346
ENSG00000105246	EBI3	0.70666	0.279094	3.03651	0.00261802	0.0136938	-1.9014
ENSG00000105248	YJU2	0.226485	-0.124336	1.83581	0.0674427	0.153504	-4.63493
ENSG00000105254	TBCB	0.0238441	2.09462	0.260187	0.79491	0.868779	-6.56158
ENSG00000105258	POLR2I	-0.239374	0.518198	-1.11963	0.263829	0.407381	-5.81423
ENSG00000105281	SLC1A5	-0.121155	0.777248	-0.939821	0.348116	0.494782	-6.02599
ENSG00000105287	PRKD2	0.281879	3.22341	2.38952	0.0175301	0.0570279	-3.85029
ENSG00000105289	TJP3	-0.209655	0.0339976	-0.980919	0.327477	0.47428	-5.86918
ENSG00000105290	APLP1	-0.224012	0.0350821	-0.993479	0.321332	0.46772	-5.86005
ENSG00000105321	CCDC9	0.131126	2.32284	1.19234	0.234135	0.373104	-5.90752
ENSG00000105323	HNRNPUL1	-0.0570611	2.85095	-0.642973	0.520766	0.652798	-6.42817
ENSG00000105325	FZR1	0.0300482	1.73364	0.323067	0.746885	0.836348	-6.51635
ENSG00000105327	BBC3	-0.229957	1.35692	-1.52529	0.128312	0.244362	-5.40491
ENSG00000105329	TGFB1	0.313862	3.98637	3.1348	0.00190189	0.010729	-1.88295
ENSG00000105339	DENND3	0.299964	5.36272	2.18881	0.0294336	0.0839596	-4.29668
ENSG00000105341	DMAC2	-0.156154	0.480412	-1.42892	0.154138	0.278461	-5.41415
ENSG00000105352	CEACAM4	0.365192	1.55285	2.05355	0.0409447	0.107197	-4.47162
ENSG00000105355	PLIN3	0.0372795	3.12603	0.44059	0.659849	0.768516	-6.54272
ENSG00000105357	MYH14	-0.61703	0.699049	-2.76685	0.00603565	0.0257286	-2.7742
ENSG00000105364	MRPL4	-0.441902	-0.0488486	-3.34167	0.000945616	0.00651866	-1.00607
ENSG00000105372	RPS19	-0.0507776	4.97595	-0.384328	0.701026	0.800197	-6.57083
ENSG00000105373	NOP53	-0.269578	2.5086	-2.43592	0.0154756	0.0521184	-3.72862
ENSG00000105374	NKG7	1.17437	2.77324	5.43098	1.21423e-07	4.81021e-06	7.20855
ENSG00000105379	ETFB	-0.0185853	1.21712	-0.145027	0.884794	0.929083	-6.50203
ENSG00000105383	CD33	-0.17936	0.0373438	-1.34854	0.178571	0.308612	-5.44591
ENSG00000105388	CEACAM5	0.454816	1.16576	1.57713	0.115891	0.226851	-5.26197
ENSG00000105393	BABAM1	-0.024393	1.27168	-0.206032	0.836915	0.896278	-6.50155
ENSG00000105397	TYK2	-0.00516234	3.70396	-0.0509802	0.959378	0.975934	-6.64667
ENSG00000105401	CDC37	-0.226177	3.43854	-2.42837	0.0157945	0.0529027	-3.76672
ENSG00000105402	NAPA	0.522428	4.65805	5.00072	1.00742e-06	2.82536e-05	5.16578
ENSG00000105404	RABAC1	0.049138	2.57437	0.415339	0.678211	0.7838	-6.53585
ENSG00000105438	KDELR1	-0.156905	1.81047	-1.40478	0.161192	0.287615	-5.60915
ENSG00000105443	CYTH2	-0.202826	1.64694	-2.108	0.0359167	0.0971063	-4.3973
ENSG00000105483	CARD8	0.236483	3.57675	2.4576	0.0145912	0.0502047	-3.69674
ENSG00000105486	LIG1	-0.151304	0.0898769	-0.836977	0.403317	0.549668	-5.98994
ENSG00000105499	PLA2G4C	-0.153641	1.43939	-0.918139	0.359334	0.506049	-6.12859
ENSG00000105501	SIGLEC5	0.845368	2.45794	4.40274	1.52061e-05	0.000256756	2.63563
ENSG00000105514	RAB3D	0.461044	1.97462	3.16532	0.00171942	0.00995645	-1.72608
ENSG00000105518	TMEM205	-0.0951404	0.706903	-0.746113	0.456223	0.598011	-6.17543
ENSG00000105519	CAPS	-1.16262	1.19738	-4.36388	1.79699e-05	0.000293359	2.5016
ENSG00000105520	PLPPR2	0.211622	1.9601	1.60194	0.110292	0.218838	-5.32156
ENSG00000105523	FAM83E	-0.265783	-0.413408	-1.32387	0.186622	0.317673	-5.40218
ENSG00000105556	MIER2	-0.158558	0.0741403	-1.09879	0.272801	0.417254	-5.74672
ENSG00000105559	PLEKHA4	-0.347323	0.206789	-2.17688	0.0303217	0.0859065	-4.0882
ENSG00000105568	PPP2R1A	-0.189273	2.47199	-2.19533	0.0289579	0.0829389	-4.26492
ENSG00000105576	TNPO2	-0.201129	1.30327	-1.96374	0.0505467	0.125462	-4.65206
ENSG00000105583	WDR83OS	0.218142	1.66818	1.27562	0.203145	0.337341	-5.75109
ENSG00000105607	GCDH	-0.364533	-0.10486	-2.36479	0.0187203	0.05998	-3.61907
ENSG00000105609	LILRB5	-0.00227356	-0.0299337	-0.0204601	0.983691	0.989825	-6.2947
ENSG00000105612	DNASE2	0.230584	1.27224	1.63727	0.102693	0.207793	-5.19634
ENSG00000105618	PRPF31	-0.132346	0.213272	-1.14737	0.252207	0.393764	-5.71516
ENSG00000105619	TFPT	0.00814634	-0.0436818	0.0563885	0.955072	0.973514	-6.28646
ENSG00000105639	JAK3	0.652209	3.8413	4.90829	1.55957e-06	3.9568e-05	4.75296
ENSG00000105640	RPL18A	-0.257561	4.54094	-1.82331	0.069319	0.156222	-5.01632
ENSG00000105643	ARRDC2	0.0837183	2.44023	0.680165	0.49696	0.632623	-6.38659
ENSG00000105647	PIK3R2	-0.143078	0.0243243	-0.801013	0.423801	0.567126	-6.01073
ENSG00000105655	ISYNA1	0.0647264	0.128223	0.398691	0.690424	0.792876	-6.24795
ENSG00000105656	ELL	0.0565464	2.87112	0.488974	0.625241	0.73997	-6.51438
ENSG00000105669	COPE	0.125905	3.39906	1.48593	0.138419	0.258019	-5.55845
ENSG00000105671	DDX49	-0.0197901	1.04702	-0.16093	0.872264	0.921305	-6.48145
ENSG00000105676	ARMC6	0.107076	0.0553404	0.84369	0.399561	0.545758	-5.96773
ENSG00000105677	TMEM147	-0.151782	0.53146	-1.02305	0.307162	0.453193	-5.9067
ENSG00000105697	HAMP	0.96931	1.51779	3.78069	0.00019104	0.00189768	0.343458
ENSG00000105698	USF2	0.278674	3.7414	2.68475	0.00768965	0.0309219	-3.13542
ENSG00000105699	LSR	-0.383346	0.675767	-2.22737	0.026715	0.0781291	-4.04808
ENSG00000105700	KXD1	-0.24375	2.19312	-2.80451	0.00539077	0.0235225	-2.78588
ENSG00000105701	FKBP8	0.0519982	3.5409	0.557407	0.577693	0.700691	-6.49282
ENSG00000105705	SUGP1	0.0645775	0.873121	0.547057	0.584774	0.707072	-6.31271
ENSG00000105707	HPN	0.266768	0.700997	1.33147	0.184115	0.315095	-5.56216
ENSG00000105711	SCN1B	0.18449	1.80876	0.999891	0.318224	0.464363	-6.07663
ENSG00000105722	ERF	-0.0903031	1.90158	-0.671775	0.502279	0.637827	-6.36306
ENSG00000105723	GSK3A	0.068461	1.84508	0.697245	0.486226	0.624124	-6.33504
ENSG00000105726	ATP13A1	0.166676	1.72569	1.44272	0.150214	0.273987	-5.53764
ENSG00000105738	SIPA1L3	-0.0331065	1.12733	-0.213005	0.831478	0.893469	-6.48219
ENSG00000105755	ETHE1	-0.362008	0.425476	-2.48083	0.0136932	0.04796	-3.43734
ENSG00000105771	SMG9	-0.400172	2.2272	-3.46008	0.000623882	0.0047831	-0.83694
ENSG00000105778	AVL9	0.210756	2.04218	2.32412	0.0208322	0.0649372	-3.95093
ENSG00000105792	CFAP69	-0.150618	0.242821	-0.943017	0.346483	0.493293	-5.9257
ENSG00000105808	RASA4	-0.376613	1.15902	-2.29756	0.0223219	0.0684539	-3.95856
ENSG00000105810	CDK6	-0.0920086	-0.174444	-0.691479	0.489836	0.626796	-6.04305
ENSG00000105819	PMPCB	0.00845539	0.725212	0.0991551	0.921086	0.951035	-6.43343
ENSG00000105821	DNAJC2	-0.0609308	0.504741	-0.576258	0.564902	0.689572	-6.25014
ENSG00000105835	NAMPT	0.191495	9.03191	1.45922	0.145623	0.268074	-5.51838
ENSG00000105851	PIK3CG	0.378545	1.59847	3.01187	0.00283281	0.0145544	-2.15009
ENSG00000105854	PON2	-0.337893	-0.409493	-1.97171	0.0496238	0.123688	-4.37863
ENSG00000105855	ITGB8	-0.541949	1.5726	-3.69562	0.000263655	0.00246479	-0.0114881
ENSG00000105856	HBP1	0.369533	3.42244	4.01643	7.58981e-05	0.00092928	1.09402
ENSG00000105866	SP4	-0.118475	-0.244048	-0.710781	0.47781	0.617022	-6.01936
ENSG00000105875	WDR91	-0.0358324	1.15046	-0.240265	0.8103	0.878866	-6.47794
ENSG00000105877	DNAH11	-0.412631	1.48446	-1.90673	0.0575756	0.137333	-4.78315
ENSG00000105879	CBLL1	0.497874	0.646249	3.55279	0.000446911	0.00371476	-0.369088
ENSG00000105887	MTPN	0.148589	3.38259	1.60758	0.109051	0.216827	-5.37368
ENSG00000105928	GSDME	-0.157131	-0.154518	-0.933754	0.351232	0.49806	-5.86965
ENSG00000105939	ZC3HAV1	1.06033	2.89566	6.08425	3.82024e-09	2.62982e-07	10.5101
ENSG00000105953	OGDH	0.0181514	2.54109	0.226119	0.821273	0.886665	-6.59413
ENSG00000105963	ADAP1	-0.214354	2.90759	-1.59335	0.112206	0.221748	-5.3897
ENSG00000105967	TFEC	0.829847	2.71132	4.21935	3.30977e-05	0.000475641	1.89498
ENSG00000105968	H2AZ2	-0.0942219	1.99237	-0.850216	0.395929	0.542584	-6.23572
ENSG00000105976	MET	-0.0602294	0.307854	-0.354265	0.723406	0.817862	-6.30934
ENSG00000105983	LMBR1	-0.0199786	1.82164	-0.19485	0.845651	0.903088	-6.55911
ENSG00000105993	DNAJB6	0.0636118	3.9583	0.926989	0.354728	0.501212	-6.22575
ENSG00000106003	LFNG	-0.104771	1.99979	-0.890646	0.373881	0.520725	-6.19921
ENSG00000106009	BRAT1	0.0127467	0.333361	0.11213	0.910801	0.944784	-6.36328
ENSG00000106012	IQCE	-0.17156	1.28388	-1.54167	0.12428	0.238945	-5.36737
ENSG00000106028	SSBP1	-0.115046	1.49618	-1.00435	0.316074	0.46264	-6.05189
ENSG00000106052	TAX1BP1	0.0576007	2.77262	0.624763	0.532634	0.663534	-6.43612
ENSG00000106066	CPVL	-0.121292	1.66638	-0.972274	0.331751	0.478779	-6.09885
ENSG00000106069	CHN2	-0.282632	-0.0356376	-1.68916	0.092299	0.192457	-4.93199
ENSG00000106070	GRB10	0.126629	1.81396	0.712462	0.47677	0.616003	-6.32049
ENSG00000106077	ABHD11	-0.382915	0.0706342	-2.33916	0.0200282	0.0630098	-3.70181
ENSG00000106089	STX1A	-0.255927	0.388929	-1.4282	0.154345	0.278785	-5.41241
ENSG00000106100	NOD1	0.187998	-0.255958	1.13878	0.255764	0.397999	-5.60312
ENSG00000106105	GARS1	0.0525507	2.42524	0.481835	0.630298	0.744579	-6.49977
ENSG00000106144	CASP2	0.0598477	0.207645	0.532934	0.5945	0.715173	-6.19369
ENSG00000106153	CHCHD2	-0.0444164	3.45938	-0.414794	0.678609	0.78388	-6.56071
ENSG00000106211	HSPB1	-0.234472	3.67469	-1.08168	0.280324	0.42467	-6.0723
ENSG00000106244	PDAP1	0.0772041	3.01206	0.674571	0.500503	0.635982	-6.41156
ENSG00000106245	BUD31	0.131195	2.74976	1.20895	0.227698	0.365177	-5.9079
ENSG00000106258	CYP3A5	-0.805806	-0.0183115	-5.24854	3.02676e-07	1.02743e-05	6.42074
ENSG00000106261	ZKSCAN1	-0.0113786	1.74357	-0.126928	0.899089	0.938317	-6.56139
ENSG00000106263	EIF3B	-0.286145	1.55724	-2.70779	0.00718856	0.0293262	-3.00207
ENSG00000106266	SNX8	0.079317	2.57633	0.591288	0.554803	0.681067	-6.44819
ENSG00000106268	NUDT1	-0.211753	0.731829	-0.897018	0.370477	0.51789	-6.06781
ENSG00000106290	TAF6	0.00731901	0.489304	0.0526394	0.958057	0.975195	-6.39103
ENSG00000106330	MOSPD3	0.0873213	-0.339988	0.603125	0.546912	0.674958	-6.04849
ENSG00000106344	RBM28	-0.319627	0.510606	-2.66485	0.00814783	0.0323057	-2.99762
ENSG00000106346	USP42	0.354449	0.267902	3.15665	0.00176954	0.010178	-1.5682
ENSG00000106348	IMPDH1	-0.020403	3.2916	-0.188801	0.850385	0.905875	-6.62541
ENSG00000106367	AP1S1	-0.178444	0.0882901	-1.28594	0.199523	0.332959	-5.53202
ENSG00000106392	C1GALT1	0.435052	2.13598	3.32856	0.000989455	0.00675464	-1.23554
ENSG00000106397	PLOD3	-0.384385	1.78703	-3.26506	0.00122996	0.00789805	-1.43382
ENSG00000106399	RPA3	0.110838	-0.150705	0.645068	0.51941	0.651687	-6.05427
ENSG00000106400	ZNHIT1	0.0258106	1.96916	0.278222	0.781046	0.859832	-6.5468
ENSG00000106415	GLCCI1	-0.107347	0.0133393	-0.736951	0.461767	0.602762	-6.05138
ENSG00000106459	NRF1	0.217183	0.0861707	1.83591	0.0674274	0.153504	-4.68009
ENSG00000106460	TMEM106B	-0.253651	0.699081	-2.24998	0.0252244	0.0749499	-3.99579
ENSG00000106462	EZH2	0.544635	0.384608	3.4701	0.000601999	0.00465037	-0.599685
ENSG00000106541	AGR2	0.0752929	1.86054	0.268326	0.788645	0.865369	-6.53741
ENSG00000106546	AHR	-0.0761141	2.31851	-0.580017	0.562368	0.687354	-6.44388
ENSG00000106554	CHCHD3	-0.197847	0.502281	-1.69895	0.0904348	0.189736	-5.00969
ENSG00000106560	GIMAP2	0.581302	1.30643	3.19817	0.00154121	0.0092427	-1.55804
ENSG00000106565	TMEM176B	0.660546	2.15408	3.30233	0.00108295	0.00725206	-1.31181
ENSG00000106588	PSMA2	0.314419	1.64476	2.11562	0.0352574	0.0959857	-4.36177
ENSG00000106591	MRPL32	-0.0941464	-0.0979658	-0.611169	0.541582	0.669956	-6.10435
ENSG00000106603	COA1	-0.205247	1.4246	-2.1654	0.0311989	0.0874244	-4.25911
ENSG00000106605	BLVRA	-0.0723026	1.8988	-0.502982	0.615371	0.732235	-6.45729
ENSG00000106608	URGCP	-0.0424229	-0.149844	-0.305288	0.760373	0.845011	-6.23632
ENSG00000106609	TMEM248	0.0854379	2.20059	0.990056	0.322999	0.469383	-6.11744
ENSG00000106615	RHEB	-0.107355	2.48348	-1.17921	0.239311	0.379169	-5.93579
ENSG00000106617	PRKAG2	0.0537159	2.41618	0.570924	0.568508	0.692966	-6.45162
ENSG00000106628	POLD2	-0.498396	0.224114	-3.04799	0.00252314	0.0133382	-1.92907
ENSG00000106635	BCL7B	-0.0651793	1.72008	-0.695135	0.487545	0.625116	-6.33007
ENSG00000106636	YKT6	0.106725	1.75182	1.16246	0.246034	0.386647	-5.90014
ENSG00000106638	TBL2	0.0669973	1.35807	0.612563	0.540661	0.669508	-6.34113
ENSG00000106665	CLIP2	-0.237145	0.527816	-2.04121	0.0421646	0.109575	-4.39983
ENSG00000106682	EIF4H	0.00745973	3.16258	0.0883758	0.929641	0.956484	-6.63597
ENSG00000106683	LIMK1	0.0913265	1.43387	0.976936	0.329441	0.476233	-6.06571
ENSG00000106714	CNTNAP3	-0.146184	0.782947	-0.69509	0.487574	0.625116	-6.21579
ENSG00000106723	SPIN1	-0.150692	0.47329	-1.15851	0.24764	0.388675	-5.75326
ENSG00000106733	NMRK1	0.281679	0.936432	2.42293	0.0160283	0.0535366	-3.61328
ENSG00000106780	MEGF9	0.2959	1.92027	2.20129	0.0285284	0.0820671	-4.20747
ENSG00000106785	TRIM14	0.396255	1.58668	2.62006	0.00926959	0.0357562	-3.19966
ENSG00000106799	TGFBR1	0.157203	2.20987	1.20099	0.230767	0.368859	-5.88993
ENSG00000106803	SEC61B	-0.111	2.57076	-0.870386	0.384833	0.531472	-6.2506
ENSG00000106829	TLE4	0.219468	3.70982	2.5456	0.0114436	0.0418155	-3.4859
ENSG00000106853	PTGR1	-0.383949	0.551622	-2.85672	0.00460017	0.0208971	-2.50612
ENSG00000106868	SUSD1	-0.160171	1.22601	-1.52489	0.128411	0.244502	-5.38152
ENSG00000106948	AKNA	0.199527	3.58936	1.91622	0.0563516	0.135167	-4.84556
ENSG00000106952	TNFSF8	-0.421151	1.03973	-2.25545	0.0248743	0.0742683	-4.03802
ENSG00000106976	DNM1	-0.357199	-0.355017	-1.41517	0.158127	0.283786	-5.29535
ENSG00000106991	ENG	0.0822971	2.33984	0.546556	0.585118	0.707343	-6.45933
ENSG00000106992	AK1	-0.699956	-0.61446	-3.72947	0.000232096	0.00222252	0.320564
ENSG00000107020	PLGRKT	0.342033	0.734734	2.47449	0.0139331	0.048603	-3.45786
ENSG00000107036	RIC1	0.481314	0.542285	4.0555	6.48533e-05	0.000822333	1.41572
ENSG00000107077	KDM4C	0.200797	1.34298	1.89035	0.05974	0.14099	-4.77242
ENSG00000107099	DOCK8	0.45727	4.02242	4.79732	2.61366e-06	6.09689e-05	4.26147
ENSG00000107104	KANK1	-0.128569	-0.101613	-0.873271	0.383261	0.530189	-5.92981
ENSG00000107140	TESK1	-0.0377689	0.888338	-0.317917	0.750784	0.838711	-6.4228
ENSG00000107164	FUBP3	-0.175447	0.754882	-1.42018	0.156664	0.281835	-5.47403
ENSG00000107175	CREB3	-0.165069	0.473206	-1.45487	0.146823	0.269851	-5.37981
ENSG00000107201	DDX58	1.71354	2.53559	7.06254	1.28707e-11	3.31433e-09	15.9882
ENSG00000107223	EDF1	-0.0467387	2.83935	-0.311905	0.755344	0.841989	-6.58386
ENSG00000107242	PIP5K1B	-0.146007	-0.11932	-1.08541	0.278673	0.423276	-5.71655
ENSG00000107249	GLIS3	-0.427736	-0.497519	-2.45907	0.0145328	0.050038	-3.34478
ENSG00000107262	BAG1	0.168333	2.81756	1.29176	0.197502	0.330986	-5.80706
ENSG00000107263	RAPGEF1	-0.0836828	3.84157	-0.809575	0.41887	0.563069	-6.3259
ENSG00000107281	NPDC1	0.25459	-0.589922	1.29733	0.195583	0.329032	-5.33722
ENSG00000107290	SETX	0.56708	2.46858	4.96387	1.20008e-06	3.2102e-05	5.02664
ENSG00000107331	ABCA2	0.354171	1.92645	2.60941	0.0095559	0.0365828	-3.25951
ENSG00000107341	UBE2R2	0.114772	2.19259	1.18599	0.236628	0.376128	-5.90828
ENSG00000107371	EXOSC3	-0.129411	0.778383	-1.01773	0.309684	0.455821	-5.9521
ENSG00000107372	ZFAND5	-0.177325	3.82127	-1.80311	0.0724427	0.161122	-5.05396
ENSG00000107404	DVL1	-0.25413	0.597532	-1.87009	0.0625116	0.145236	-4.73505
ENSG00000107438	PDLIM1	-0.931271	0.931664	-4.43073	1.34733e-05	0.000231467	2.7956
ENSG00000107521	HPS1	0.277547	2.83543	3.37583	0.000839694	0.00597682	-1.12007
ENSG00000107551	RASSF4	0.288559	1.84902	2.09972	0.0366451	0.0983207	-4.41263
ENSG00000107566	ERLIN1	0.000231897	1.06873	0.00155671	0.998759	0.999571	-6.4907
ENSG00000107581	EIF3A	0.00667706	2.32509	0.0665293	0.947004	0.967811	-6.60595
ENSG00000107614	TRDMT1	0.070866	0.375164	0.454476	0.649837	0.760461	-6.27151
ENSG00000107625	DDX50	0.0295669	0.405155	0.279783	0.77985	0.859065	-6.34035
ENSG00000107643	MAPK8	-0.184765	0.948666	-1.60409	0.109817	0.218143	-5.2273
ENSG00000107651	SEC23IP	-0.0551848	1.26408	-0.45364	0.650438	0.760606	-6.41931
ENSG00000107669	ATE1	-0.16704	0.0351614	-0.949004	0.343434	0.490325	-5.8918
ENSG00000107736	CDH23	0.232371	1.06387	1.92981	0.0546369	0.132246	-4.66697
ENSG00000107738	VSIR	0.45754	4.40029	3.43863	0.000673267	0.00505156	-0.935015
ENSG00000107742	SPOCK2	0.248743	0.330904	1.3095	0.191436	0.323797	-5.51966
ENSG00000107745	MICU1	0.318322	2.07146	3.62229	0.000346417	0.00303122	-0.272277
ENSG00000107758	PPP3CB	0.1483	0.889324	1.3504	0.177975	0.308015	-5.56375
ENSG00000107771	CCSER2	0.14601	1.18889	1.4454	0.149459	0.27296	-5.47621
ENSG00000107796	ACTA2	0.343388	0.181434	2.0458	0.0417073	0.108817	-4.28431
ENSG00000107798	LIPA	0.669566	3.18045	3.02173	0.00274498	0.0141771	-2.19788
ENSG00000107819	SFXN3	-0.205687	1.52611	-1.9424	0.0530875	0.129837	-4.7103
ENSG00000107829	FBXW4	-0.227393	0.930787	-1.961	0.0508671	0.12613	-4.61322
ENSG00000107854	TNKS2	0.563391	1.34306	4.50734	9.64479e-06	0.000178465	3.12188
ENSG00000107862	GBF1	0.0784098	0.738489	0.841784	0.400625	0.546832	-6.08773
ENSG00000107863	ARHGAP21	-0.209774	1.43998	-1.7558	0.0802125	0.173465	-5.04059
ENSG00000107874	CUEDC2	0.00796514	0.572132	0.0719501	0.942693	0.965949	-6.41444
ENSG00000107897	ACBD5	0.352854	0.191656	3.11707	0.00201594	0.0112309	-1.67554
ENSG00000107902	LHPP	-0.480342	-0.204717	-2.93567	0.00360349	0.0174671	-2.17591
ENSG00000107929	LARP4B	0.272073	2.88571	3.06243	0.00240832	0.0128496	-2.07949
ENSG00000107937	GTPBP4	-0.19439	0.464315	-1.53305	0.126388	0.241931	-5.26843
ENSG00000107938	EDRF1	0.131809	0.0327154	1.13169	0.258731	0.401286	-5.67403
ENSG00000107949	BCCIP	-0.361273	0.0816015	-2.81315	0.00525201	0.0231013	-2.54862
ENSG00000107959	PITRM1	-0.291111	0.85265	-2.51936	0.0123117	0.0443617	-3.3984
ENSG00000107968	MAP3K8	-0.0373119	3.76525	-0.348776	0.727519	0.821295	-6.58849
ENSG00000108010	GLRX3	-0.302994	2.15671	-2.35033	0.0194483	0.061698	-3.91311
ENSG00000108021	TASOR2	0.162033	1.27269	1.25708	0.20977	0.344137	-5.73729
ENSG00000108039	XPNPEP1	-0.0336154	1.69161	-0.287974	0.773579	0.854862	-6.52297
ENSG00000108061	SHOC2	0.236298	3.16885	2.56097	0.0109608	0.0404415	-3.44005
ENSG00000108064	TFAM	0.221138	0.251166	1.69494	0.0911949	0.190924	-4.95121
ENSG00000108094	CUL2	0.0592288	0.435448	0.448138	0.654399	0.764074	-6.28166
ENSG00000108100	CCNY	-0.0717291	1.75204	-0.638531	0.523648	0.655326	-6.36948
ENSG00000108106	UBE2S	0.359333	1.87441	2.17574	0.0304082	0.0860414	-4.25779
ENSG00000108107	RPL28	0.208294	5.59941	1.75704	0.0800005	0.173197	-5.1218
ENSG00000108175	ZMIZ1	-0.0752538	3.45964	-0.598646	0.549891	0.677149	-6.46898
ENSG00000108179	PPIF	0.314909	5.77607	2.17514	0.0304538	0.0860962	-4.31878
ENSG00000108187	PBLD	-0.0139776	0.340668	-0.118819	0.905504	0.941762	-6.37087
ENSG00000108219	TSPAN14	0.321061	3.9329	3.28207	0.00116069	0.00758186	-1.43308
ENSG00000108244	KRT23	0.00551071	2.38478	0.0351583	0.971978	0.983053	-6.60837
ENSG00000108256	NUFIP2	0.311536	2.90205	2.76593	0.00605221	0.0257579	-2.90538
ENSG00000108262	GIT1	0.0582646	0.801667	0.48479	0.628203	0.74247	-6.33383
ENSG00000108298	RPL19	-0.174435	4.7044	-1.44345	0.150008	0.273763	-5.62173
ENSG00000108312	UBTF	-0.165117	1.67126	-1.76487	0.0786714	0.170996	-5.04409
ENSG00000108342	CSF3	-0.283646	0.312875	-1.16423	0.245319	0.385857	-5.7377
ENSG00000108344	PSMD3	0.180701	1.50346	1.5894	0.113095	0.223008	-5.30014
ENSG00000108349	CASC3	-0.125133	3.1434	-1.55128	0.121961	0.235593	-5.45905
ENSG00000108352	RAPGEFL1	-0.0647025	0.486881	-0.486123	0.627259	0.741711	-6.28551
ENSG00000108387	SEPTIN4	0.00257557	1.02161	0.0164229	0.986909	0.992352	-6.49099
ENSG00000108389	MTMR4	-0.203978	1.18356	-1.6651	0.0970071	0.199652	-5.16532
ENSG00000108395	TRIM37	-0.0967796	-0.0747432	-0.618479	0.536761	0.666987	-6.11609
ENSG00000108405	P2RX1	0.307653	1.66549	1.83626	0.0673756	0.153422	-4.90135
ENSG00000108406	DHX40	-0.152849	0.8582	-1.34537	0.179591	0.309875	-5.58594
ENSG00000108423	TUBD1	-0.0958382	-0.228606	-0.64652	0.51847	0.651289	-6.06681
ENSG00000108424	KPNB1	0.41504	4.2166	4.46552	1.1582e-05	0.0002058	2.85337
ENSG00000108433	GOSR2	-0.0179607	1.14429	-0.189394	0.849921	0.905674	-6.48468
ENSG00000108439	PNPO	-0.212527	-0.215737	-1.59944	0.110847	0.219641	-5.04288
ENSG00000108443	RPS6KB1	-0.188461	1.25543	-1.66812	0.0964066	0.198707	-5.17137
ENSG00000108465	CDK5RAP3	0.137043	2.57083	1.54111	0.124415	0.239068	-5.45294
ENSG00000108468	CBX1	-0.1128	0.407346	-1.05051	0.294388	0.439218	-5.85128
ENSG00000108469	RECQL5	-0.00486556	0.866776	-0.0358645	0.971416	0.982797	-6.46275
ENSG00000108474	PIGL	-0.461668	1.04924	-2.30184	0.0220757	0.0678678	-3.93877
ENSG00000108479	GALK1	0.0746374	0.766687	0.607547	0.543979	0.672307	-6.26139
ENSG00000108509	CAMTA2	-0.156785	2.48486	-1.45318	0.147291	0.270359	-5.58406
[truncated: 7,845 more rows]

## Sheet: C (IPC v CTRL)
ENSEMBL_ID	gene_symbol	logFC	AveExpr	t	P.Value	adj.P.Val	B
ENSG00000000419	DPM1	0.350255	1.11361	1.87037	0.0638099	0.509031	-4.09656
ENSG00000000938	FGR	0.104848	5.78146	0.588189	0.557484	0.881496	-5.55809
ENSG00000001036	FUCA2	0.0549154	1.20057	0.315371	0.753015	0.946268	-5.57149
ENSG00000001084	GCLC	0.142762	1.46933	0.548758	0.584167	0.893215	-5.50598
ENSG00000001167	NFYA	0.0812046	1.1787	0.428214	0.669245	0.92089	-5.5314
ENSG00000001626	CFTR	0.204508	1.89711	0.483807	0.629384	0.907912	-5.56328
ENSG00000001629	ANKIB1	0.0554019	1.23506	0.287549	0.774176	0.950681	-5.58209
ENSG00000001630	CYP51A1	-0.113279	0.586696	-0.527808	0.598584	0.899202	-5.42798
ENSG00000001631	KRIT1	-0.401571	1.14427	-2.4569	0.0154093	0.358602	-3.0392
ENSG00000002016	RAD52	0.0404885	-0.0676963	0.194683	0.845962	0.968474	-5.4401
ENSG00000002330	BAD	-0.200631	0.997579	-0.899253	0.370276	0.800303	-5.24574
ENSG00000002549	LAP3	0.290577	3.03733	1.12736	0.261785	0.734798	-5.14415
ENSG00000002586	CD99	-0.216802	3.52446	-1.21849	0.225369	0.707277	-5.055
ENSG00000002587	HS3ST1	-0.101253	0.34097	-0.351966	0.725466	0.938018	-5.46261
ENSG00000002822	MAD1L1	0.025211	2.14751	0.118319	0.906008	0.98289	-5.67777
ENSG00000002834	LASP1	-0.0220425	3.98687	-0.15852	0.874307	0.974855	-5.71321
ENSG00000002919	SNX11	0.10067	1.8101	0.58854	0.55725	0.881496	-5.511
ENSG00000002933	TMEM176A	0.449764	1.50825	1.51571	0.132159	0.611647	-4.6309
ENSG00000003056	M6PR	-0.21722	3.55088	-1.0479	0.296739	0.757907	-5.22835
ENSG00000003147	ICA1	0.205581	0.516028	0.807253	0.42108	0.829519	-5.2532
ENSG00000003393	ALS2	0.293635	0.53868	1.61291	0.109327	0.587625	-4.43516
ENSG00000003400	CASP10	0.32497	1.27571	1.57289	0.118314	0.597889	-4.54267
ENSG00000003402	CFLAR	0.433896	6.18288	2.55569	0.0118161	0.324974	-2.85517
ENSG00000003436	TFPI	0.0223689	0.910923	0.103659	0.917609	0.983858	-5.578
ENSG00000003509	NDUFAF7	-0.143323	-0.0728041	-0.880425	0.380346	0.804935	-5.14017
ENSG00000003756	RBM5	0.0926946	3.80766	0.70275	0.48354	0.855736	-5.50183
ENSG00000004059	ARF5	0.0417174	2.96424	0.24227	0.808975	0.958309	-5.68855
ENSG00000004142	POLDIP2	-0.0289912	0.579089	-0.133446	0.894059	0.979394	-5.5383
ENSG00000004399	PLXND1	-0.344743	2.97418	-1.71725	0.0884509	0.566585	-4.40198
ENSG00000004455	AK2	0.185636	2.44626	1.13855	0.257105	0.732755	-5.1201
ENSG00000004468	CD38	0.471036	0.609306	1.86477	0.064597	0.511168	-4.0721
ENSG00000004478	FKBP4	0.0284473	2.08174	0.128394	0.898047	0.980086	-5.67485
ENSG00000004487	KDM1A	-0.506462	0.50204	-2.69433	0.00803924	0.316532	-2.53472
ENSG00000004534	RBM6	0.096296	2.00546	0.720042	0.472865	0.851837	-5.4451
ENSG00000004660	CAMKK1	-0.289149	0.227866	-1.5229	0.130352	0.609009	-4.53483
ENSG00000004700	RECQL	-0.200476	0.396656	-0.863266	0.389672	0.810085	-5.21127
ENSG00000004766	VPS50	0.129277	0.455977	0.599035	0.550252	0.878933	-5.37431
ENSG00000004779	NDUFAB1	-0.422739	1.13212	-1.64878	0.101746	0.583525	-4.43617
ENSG00000004838	ZMYND10	-0.43769	1.21895	-1.15021	0.252288	0.728562	-5.04453
ENSG00000004864	SLC25A13	0.766108	2.56538	2.70335	0.00783626	0.316532	-2.52372
ENSG00000004866	ST7	-0.423662	0.530393	-1.55354	0.122863	0.603491	-4.52287
ENSG00000004897	CDC27	0.0897018	2.07284	0.576971	0.565014	0.884352	-5.5319
ENSG00000004975	DVL2	-0.0834073	1.52997	-0.517546	0.605705	0.901506	-5.52746
ENSG00000005001	PRSS22	-0.026568	0.684825	-0.0744824	0.940748	0.990013	-5.55619
ENSG00000005007	UPF1	-0.327402	2.68116	-2.33959	0.0209166	0.386622	-3.30575
ENSG00000005020	SKAP2	-0.10527	3.4868	-0.525257	0.60035	0.900205	-5.59786
ENSG00000005022	SLC25A5	-0.280287	2.90328	-1.42718	0.156062	0.64621	-4.80512
ENSG00000005059	MCUB	-0.395722	1.32507	-1.71018	0.0897551	0.568173	-4.35913
ENSG00000005075	POLR2J	-0.16319	1.65796	-0.748903	0.455346	0.846488	-5.40805
ENSG00000005156	LIG3	0.214568	1.46137	1.21132	0.228094	0.709456	-4.99315
ENSG00000005175	RPAP3	-0.115134	0.433728	-0.54661	0.585637	0.893503	-5.40279
ENSG00000005187	ACSM3	0.315474	1.07147	1.19817	0.233156	0.712922	-4.97098
ENSG00000005194	CIAPIN1	-0.0679552	0.288294	-0.291781	0.770946	0.950088	-5.46998
ENSG00000005206	SPPL2B	-0.283507	1.52869	-1.18666	0.23765	0.716114	-5.02776
ENSG00000005238	FAM214B	-0.240664	2.03634	-1.267	0.207551	0.693335	-4.96752
ENSG00000005302	MSL3	-0.0427611	2.4878	-0.225159	0.822229	0.962029	-5.67464
ENSG00000005339	CREBBP	0.193475	4.53682	0.786822	0.4329	0.839532	-5.44475
ENSG00000005379	TSPOAP1	-0.0938158	1.37755	-0.380927	0.703915	0.929906	-5.56759
ENSG00000005448	WDR54	-0.0340416	0.180629	-0.113766	0.909609	0.983513	-5.48969
ENSG00000005483	KMT2E	0.406352	3.78287	2.25114	0.0261525	0.422042	-3.48742
ENSG00000005486	RHBDD2	-0.289441	3.21747	-1.64636	0.102244	0.58415	-4.51117
ENSG00000005700	IBTK	-0.176878	0.515131	-0.960665	0.338606	0.782475	-5.14764
ENSG00000005801	ZNF195	-0.103811	0.640057	-0.398548	0.690917	0.926461	-5.48409
ENSG00000005810	MYCBP2	0.0731539	2.07613	0.45136	0.652525	0.913526	-5.58915
ENSG00000005812	FBXL3	-0.0490321	1.4533	-0.24671	0.805544	0.956751	-5.61198
ENSG00000005844	ITGAL	-0.532709	3.07233	-3.22845	0.00159604	0.243045	-1.2293
ENSG00000005884	ITGA3	-0.442381	0.679996	-1.47656	0.14235	0.630227	-4.63377
ENSG00000005889	ZFX	0.0770733	2.38881	0.419523	0.675566	0.922752	-5.61783
ENSG00000005893	LAMP2	-0.0261779	3.38486	-0.130047	0.896742	0.979597	-5.71355
ENSG00000006007	GDE1	-0.154109	1.02101	-0.867793	0.387198	0.808227	-5.27113
ENSG00000006015	REX1BD	-0.568742	1.22902	-2.70692	0.00775735	0.316532	-2.50635
ENSG00000006118	TMEM132A	0.254617	1.23264	1.26645	0.207747	0.693335	-4.91548
ENSG00000006125	AP2B1	0.417757	3.22866	2.40201	0.0178012	0.367641	-3.1832
ENSG00000006194	ZNF263	-0.00462961	0.428662	-0.0259604	0.979331	0.996457	-5.52625
ENSG00000006282	SPATA20	-0.10958	0.776012	-0.657406	0.512148	0.869182	-5.38419
ENSG00000006327	TNFRSF12A	-0.463381	1.52952	-1.44506	0.150986	0.641754	-4.73394
ENSG00000006451	RALA	0.130703	1.91575	0.744576	0.457949	0.846787	-5.4241
ENSG00000006453	BAIAP2L1	0.11851	1.14534	0.646345	0.51926	0.871564	-5.42478
ENSG00000006459	KDM7A	-0.0796135	0.962691	-0.408705	0.683467	0.924093	-5.51821
ENSG00000006530	AGK	-0.0122341	1.44873	-0.066247	0.947289	0.991193	-5.63585
ENSG00000006534	ALDH3B1	-0.510454	2.2183	-2.20901	0.0290268	0.435248	-3.55295
ENSG00000006576	PHTF2	0.155452	0.0321537	0.754996	0.451695	0.844487	-5.23056
ENSG00000006607	FARP2	-0.238855	1.3852	-0.937841	0.350165	0.786181	-5.24922
ENSG00000006634	DBF4	0.151422	-0.219045	0.604566	0.546581	0.878654	-5.28566
ENSG00000006652	IFRD1	0.289094	4.33311	1.23046	0.220875	0.703199	-5.04562
ENSG00000006712	PAF1	0.14146	2.67569	0.949817	0.344068	0.782846	-5.30275
ENSG00000006715	VPS41	-0.0650029	2.19447	-0.376518	0.70718	0.930517	-5.62398
ENSG00000006744	ELAC2	-0.148038	1.04232	-0.733073	0.464909	0.850031	-5.36707
ENSG00000006747	SCIN	0.187972	0.439733	0.73921	0.461188	0.849458	-5.28779
ENSG00000006756	ARSD	-0.416296	0.862527	-2.76806	0.00651179	0.316532	-2.36939
ENSG00000006831	ADIPOR2	0.13567	1.81944	0.883149	0.378879	0.804678	-5.31954
ENSG00000006837	CDKL3	0.0722234	-0.0216692	0.285722	0.775572	0.950757	-5.42639
ENSG00000007047	MARK4	0.0338072	1.89135	0.197122	0.844058	0.967971	-5.65322
ENSG00000007062	PROM1	-0.536096	0.723388	-1.56746	0.119578	0.599598	-4.52157
ENSG00000007080	CCDC124	-0.44139	1.7264	-2.27404	0.0246972	0.414661	-3.41661
ENSG00000007129	CEACAM21	0.0106432	-0.0816409	0.0465805	0.962923	0.994562	-5.45593
ENSG00000007168	PAFAH1B1	0.0188021	3.56889	0.147682	0.882836	0.977148	-5.71362
ENSG00000007174	DNAH9	-0.531542	0.648454	-1.65492	0.10049	0.583525	-4.39704
ENSG00000007202	KIAA0100	-0.134886	2.40098	-0.946041	0.345983	0.782846	-5.29682
ENSG00000007237	AC005747.1	0.308615	3.44932	1.42562	0.156512	0.64621	-4.81346
ENSG00000007264	MATK	0.251719	0.63491	0.912051	0.363526	0.79466	-5.18857
ENSG00000007341	ST7L	0.0723694	0.997455	0.444895	0.657178	0.915569	-5.50694
ENSG00000007392	LUC7L	-0.169653	1.37881	-1.07159	0.286004	0.752451	-5.13034
ENSG00000007516	BAIAP3	-0.590181	1.10543	-1.94579	0.0539611	0.494521	-3.98259
ENSG00000007520	TSR3	-0.062833	0.902123	-0.284245	0.776701	0.950757	-5.54915
ENSG00000007541	PIGQ	-0.550594	1.05215	-2.18783	0.0305725	0.435248	-3.55817
ENSG00000007545	CRAMP1	-0.21058	0.234731	-0.810852	0.419017	0.828533	-5.22802
ENSG00000007923	DNAJC11	0.197437	0.726603	0.898338	0.370761	0.800303	-5.21326
ENSG00000007944	MYLIP	0.2105	0.960228	0.931372	0.353486	0.788336	-5.20876
ENSG00000008018	PSMB1	-0.0596378	2.33687	-0.255241	0.798963	0.954721	-5.66467
ENSG00000008083	JARID2	0.091518	1.90681	0.464238	0.643298	0.911579	-5.5748
ENSG00000008086	CDKL5	0.324322	1.13991	1.20609	0.230097	0.710278	-4.96805
ENSG00000008128	CDK11A	0.187696	2.23872	1.00224	0.318194	0.774169	-5.24116
ENSG00000008130	NADK	0.327942	5.19474	1.66632	0.0981942	0.581603	-4.48299
ENSG00000008226	DLEC1	-0.740358	0.683863	-2.89596	0.00447512	0.282546	-2.0793
ENSG00000008256	CYTH3	-0.365181	0.390855	-1.64368	0.102797	0.58425	-4.38959
ENSG00000008282	SYPL1	0.0281434	1.37271	0.168042	0.866826	0.974257	-5.61944
ENSG00000008283	CYB561	-0.399947	0.925326	-1.38952	0.167186	0.656634	-4.75919
ENSG00000008294	SPAG9	0.611392	4.5565	3.3872	0.000948818	0.233504	-0.796865
ENSG00000008323	PLEKHG6	-0.145491	1.83509	-0.640802	0.522844	0.872147	-5.48412
ENSG00000008382	MPND	-0.705236	0.563818	-2.87388	0.00477859	0.285235	-2.1331
ENSG00000008394	MGST1	-0.181468	2.16739	-0.690861	0.490955	0.859235	-5.47497
ENSG00000008438	PGLYRP1	-0.513804	0.975065	-1.63025	0.105608	0.587625	-4.45335
ENSG00000008513	ST3GAL1	0.100544	3.36275	0.587547	0.557914	0.881496	-5.56566
ENSG00000008516	MMP25	-0.196566	4.33216	-0.554391	0.580318	0.891575	-5.58523
ENSG00000008517	IL32	0.527422	1.71689	1.87654	0.0629515	0.507955	-4.11552
ENSG00000008710	PKD1	-0.450645	2.08289	-1.71668	0.0885554	0.566585	-4.38506
ENSG00000008838	MED24	0.104069	2.15309	0.497806	0.61951	0.904316	-5.5742
ENSG00000008869	HEATR5B	0.0599895	0.818049	0.289552	0.772646	0.950088	-5.53546
ENSG00000008952	SEC62	0.106036	3.8476	0.723462	0.47077	0.85126	-5.48903
ENSG00000008988	RPS20	-0.250088	5.02468	-1.14031	0.256373	0.732062	-5.13713
ENSG00000009307	CSDE1	-0.0583913	4.00031	-0.376303	0.70734	0.930517	-5.66059
ENSG00000009335	UBE3C	0.0115792	1.44904	0.0725904	0.94225	0.990445	-5.63532
ENSG00000009413	REV3L	-0.0183902	1.51568	-0.0866637	0.93108	0.987114	-5.64075
ENSG00000009780	FAM76A	0.125679	0.333453	0.629133	0.530429	0.872904	-5.34191
ENSG00000009790	TRAF3IP3	0.155516	2.82711	0.59135	0.555372	0.880934	-5.55417
ENSG00000009830	POMT2	-0.513507	0.599628	-1.77026	0.0791616	0.543422	-4.22788
ENSG00000009844	VTA1	-0.0562341	0.424523	-0.239807	0.810879	0.958819	-5.50173
ENSG00000009954	BAZ1B	-0.116522	0.487684	-0.681626	0.496757	0.862494	-5.33819
ENSG00000010017	RANBP9	0.282373	1.31362	1.33066	0.185763	0.673289	-4.84879
ENSG00000010030	ETV7	0.672072	-0.432384	2.05647	0.0418526	0.456208	-3.72627
ENSG00000010219	DYRK4	0.0670149	0.254281	0.238573	0.811834	0.959502	-5.47697
ENSG00000010244	ZNF207	0.109352	3.61056	0.60348	0.547301	0.878669	-5.55925
ENSG00000010256	UQCRC1	-0.444518	2.91819	-2.56274	0.0115909	0.324974	-2.84087
ENSG00000010270	STARD3NL	0.116794	1.71524	0.834654	0.405531	0.820905	-5.34939
ENSG00000010278	CD9	-0.616162	3.39629	-2.12869	0.035275	0.447163	-3.71648
ENSG00000010292	NCAPD2	-0.122021	0.763647	-0.598949	0.550309	0.878933	-5.41361
ENSG00000010295	IFFO1	-0.204457	0.243668	-1.16183	0.247555	0.725599	-4.93794
ENSG00000010310	GIPR	-0.227893	0.301943	-0.911812	0.363652	0.79466	-5.16227
ENSG00000010322	NISCH	-0.139948	1.67305	-0.898492	0.370679	0.800303	-5.30023
ENSG00000010327	STAB1	0.0452576	2.41156	0.188844	0.850526	0.968937	-5.67623
ENSG00000010361	FUZ	-0.24093	0.59806	-0.914594	0.362195	0.79466	-5.19592
ENSG00000010404	IDS	-0.156211	3.6753	-1.20946	0.228806	0.709456	-5.06781
ENSG00000010539	ZNF200	-0.0261885	1.32619	-0.148767	0.881981	0.976791	-5.61811
ENSG00000010610	CD4	-0.271079	2.38379	-1.3811	0.169754	0.659453	-4.84553
ENSG00000010626	LRRC23	-0.375166	1.27812	-1.24962	0.213812	0.697063	-4.94587
ENSG00000010671	BTK	-0.105453	1.82023	-0.538898	0.590931	0.897108	-5.53683
ENSG00000010803	SCMH1	0.0568112	0.211068	0.260837	0.794655	0.953933	-5.4615
ENSG00000010810	FYN	0.0437843	1.93593	0.222992	0.823912	0.962029	-5.65002
ENSG00000010818	HIVEP2	0.515133	1.94655	2.68131	0.00834042	0.316532	-2.56848
ENSG00000011007	ELOA	-0.182056	0.552844	-0.912853	0.363106	0.79466	-5.18959
ENSG00000011009	LYPLA2	-0.139621	2.03337	-0.943823	0.347111	0.782988	-5.28369
ENSG00000011021	CLCN6	0.197107	1.23194	1.254	0.21222	0.696219	-4.92987
ENSG00000011114	BTBD7	-0.121739	1.02345	-0.802103	0.424041	0.831856	-5.3191
ENSG00000011132	APBA3	0.0272826	1.04797	0.166192	0.868279	0.974257	-5.587
ENSG00000011198	ABHD5	-0.368882	2.83963	-1.85136	0.0665164	0.512187	-4.19252
ENSG00000011243	AKAP8L	-0.0228458	2.26311	-0.150037	0.880981	0.976729	-5.68041
ENSG00000011260	UTP18	0.410408	1.40971	2.48117	0.0144463	0.351291	-2.99184
ENSG00000011275	RNF216	-0.142017	1.10478	-0.851153	0.396339	0.816056	-5.29193
ENSG00000011295	TTC19	0.0523245	1.14833	0.341266	0.733485	0.938816	-5.55686
ENSG00000011304	PTBP1	-0.254726	3.35611	-1.49722	0.136897	0.619879	-4.71933
ENSG00000011405	PIK3C2A	0.209248	0.582134	1.06738	0.287891	0.753108	-5.05325
ENSG00000011422	PLAUR	0.16018	7.49672	0.74587	0.457169	0.846588	-5.44447
ENSG00000011451	WIZ	-0.214886	0.519961	-1.26602	0.207899	0.693335	-4.85917
ENSG00000011454	RABGAP1	0.404215	1.60964	2.77757	0.00633534	0.314033	-2.34779
ENSG00000011485	PPP5C	-0.189709	0.871319	-0.961144	0.338366	0.782475	-5.18424
ENSG00000011523	CEP68	0.227794	1.22453	1.27539	0.204575	0.690401	-4.90423
ENSG00000011566	MAP4K3	-0.134099	1.23402	-0.629976	0.529879	0.872904	-5.44589
ENSG00000011600	TYROBP	-0.297622	6.90527	-2.3589	0.0199051	0.380552	-3.26358
ENSG00000011638	TMEM159	-0.00469427	0.519971	-0.0237863	0.981062	0.996457	-5.5357
ENSG00000012048	BRCA1	-0.0735038	0.678912	-0.337306	0.736461	0.939297	-5.50917
ENSG00000012061	ERCC1	0.0606555	2.35591	0.395554	0.693119	0.926795	-5.62476
ENSG00000012124	CD22	0.527061	2.38224	1.64784	0.101938	0.583525	-4.48918
ENSG00000012171	SEMA3B	-0.0319766	0.0719299	-0.146586	0.883699	0.977148	-5.46553
ENSG00000012211	PRICKLE3	-0.279094	0.245723	-1.20837	0.229225	0.709456	-4.89278
ENSG00000012223	LTF	-0.161378	1.2504	-0.636545	0.525604	0.872432	-5.44624
ENSG00000012232	EXTL3	-0.300558	1.75539	-1.61692	0.108457	0.587625	-4.51424
ENSG00000012660	ELOVL5	0.13778	3.15043	0.849426	0.397295	0.816828	-5.39428
ENSG00000012779	ALOX5	-0.202588	5.37048	-0.973973	0.331982	0.781639	-5.29133
ENSG00000012822	CALCOCO1	-0.0658921	2.42154	-0.390857	0.69658	0.927458	-5.62968
ENSG00000012983	MAP4K5	-0.293562	1.42284	-1.33272	0.185089	0.672781	-4.86186
ENSG00000013275	PSMC4	-0.0537016	1.96292	-0.340753	0.733871	0.939081	-5.62276
ENSG00000013288	MAN2B2	-0.334639	1.03633	-1.92884	0.0560556	0.503165	-4.00478
ENSG00000013306	SLC25A39	-0.284514	1.88465	-1.3813	0.169693	0.659453	-4.82982
ENSG00000013364	MVP	-0.0920721	4.30348	-0.813889	0.417282	0.827794	-5.42589
ENSG00000013374	NUB1	0.456903	2.29414	2.24025	0.0268707	0.427222	-3.49187
ENSG00000013375	PGM3	-0.394642	0.660512	-1.46006	0.146823	0.634919	-4.65266
ENSG00000013441	CLK1	0.164595	3.52414	0.864591	0.388947	0.80947	-5.38652
ENSG00000013561	RNF14	-0.12561	0.858652	-0.75311	0.452823	0.844932	-5.33564
ENSG00000013563	DNASE1L1	-0.30342	1.48305	-1.47579	0.142557	0.630417	-4.68924
ENSG00000013573	DDX11	-0.492211	1.41752	-1.43262	0.154505	0.645969	-4.74109
ENSG00000013583	HEBP1	-0.140942	0.687811	-0.732115	0.465491	0.850306	-5.32945
ENSG00000013588	GPRC5A	-0.428643	1.5395	-1.29644	0.197252	0.685594	-4.91154
ENSG00000013725	CD6	-0.0526234	1.50589	-0.231625	0.817214	0.961559	-5.61949
ENSG00000013810	TACC3	-0.0544591	2.0387	-0.289908	0.772375	0.950088	-5.64236
ENSG00000014164	ZC3H3	0.132107	1.86966	0.682703	0.496079	0.862177	-5.46041
ENSG00000014216	CAPN1	-0.288666	3.19933	-2.09038	0.0386434	0.451252	-3.78657
ENSG00000014257	ACPP	0.0826891	0.350623	0.362471	0.717622	0.934397	-5.45526
ENSG00000014824	SLC30A9	-0.0249935	0.76735	-0.141999	0.887313	0.978603	-5.55976
ENSG00000014919	COX15	-0.116305	0.665998	-0.652235	0.515467	0.870071	-5.3773
ENSG00000015133	CCDC88C	-0.0639342	1.65909	-0.305737	0.760322	0.948019	-5.61262
ENSG00000015153	YAF2	0.299455	1.1191	1.42821	0.155767	0.645969	-4.71624
ENSG00000015171	ZMYND11	-0.142426	0.458739	-0.73646	0.462853	0.849661	-5.30103
ENSG00000015285	WAS	-0.137403	3.87085	-0.746856	0.456576	0.846488	-5.47319
ENSG00000015475	BID	0.355494	4.50073	1.73747	0.0848085	0.559026	-4.3795
ENSG00000015479	MATR3	0.0925323	2.66813	0.580185	0.562851	0.883603	-5.5554
ENSG00000015568	RGPD5	0.17269	3.00503	0.694815	0.488482	0.858436	-5.49806
ENSG00000015676	NUDCD3	-0.392338	1.06129	-2.03059	0.044453	0.467805	-3.83688
ENSG00000016864	GLT8D1	-0.101731	0.383162	-0.470774	0.638636	0.909858	-5.42848
ENSG00000017260	ATP2C1	-0.00590763	2.29718	-0.0310671	0.975266	0.996457	-5.69134
ENSG00000017483	SLC38A5	0.226198	-0.696895	0.753674	0.452486	0.844731	-5.13511
ENSG00000017797	RALBP1	-0.149881	1.952	-1.17861	0.240829	0.718618	-5.05993
ENSG00000018189	RUFY3	-0.00817414	1.99589	-0.0425264	0.966148	0.994641	-5.67659
ENSG00000018280	SLC11A1	-0.267374	6.71555	-1.35935	0.176524	0.667755	-4.87915
ENSG00000018510	AGPS	-0.0201524	1.27466	-0.0913966	0.927326	0.986556	-5.61933
ENSG00000019144	PHLDB1	0.16255	0.961716	0.593328	0.554051	0.880336	-5.43348
ENSG00000019169	MARCO	-0.700233	4.16493	-2.4117	0.0173565	0.366614	-3.16434
ENSG00000019582	CD74	-0.707139	7.45697	-2.46387	0.015127	0.355341	-3.04531
ENSG00000020577	SAMD4A	-0.131952	0.664612	-0.461999	0.644898	0.91276	-5.46714
ENSG00000020633	RUNX3	0.13011	1.37215	0.576119	0.565587	0.88469	-5.48289
ENSG00000020922	MRE11	-0.135257	0.372423	-0.782526	0.43541	0.840549	-5.26166
ENSG00000021355	SERPINB1	0.295556	5.62845	1.92116	0.0570264	0.503444	-4.08002
ENSG00000021574	SPAST	0.016503	1.48505	0.11721	0.906884	0.982914	-5.63482
ENSG00000021762	OSBPL5	-0.520529	0.549454	-2.09314	0.0383922	0.450994	-3.70616
ENSG00000022277	RTF2	0.107518	3.5857	0.639918	0.523416	0.872147	-5.53893
ENSG00000022556	NLRP2	-0.158467	0.449419	-0.672222	0.502704	0.864173	-5.33764
ENSG00000022567	SLC45A4	0.22148	2.76657	1.04779	0.296791	0.757907	-5.21782
ENSG00000022840	RNF10	0.0938432	4.52819	0.705173	0.482036	0.855736	-5.4996
ENSG00000023041	ZDHHC6	0.0135584	1.01896	0.0627052	0.950103	0.992235	-5.59373
ENSG00000023171	GRAMD1B	0.321119	0.66597	1.33796	0.183378	0.672144	-4.7846
ENSG00000023191	RNH1	-0.596691	3.39265	-2.97745	0.00350173	0.282546	-1.87431
ENSG00000023228	NDUFS1	-0.180061	1.3794	-1.05245	0.294656	0.756527	-5.14875
ENSG00000023287	RB1CC1	0.362288	1.8889	2.33411	0.0212119	0.388785	-3.30058
ENSG00000023318	ERP44	0.122802	0.787461	0.598605	0.550537	0.878933	-5.41259
ENSG00000023330	ALAS1	-0.461749	2.26469	-2.15231	0.0333264	0.443665	-3.66051
ENSG00000023445	BIRC3	0.586203	1.80466	2.83956	0.00528786	0.298922	-2.20446
ENSG00000023608	SNAPC1	0.361676	0.53607	1.53233	0.128009	0.607423	-4.54018
ENSG00000023697	DERA	0.131952	0.331447	0.696857	0.487208	0.857869	-5.30494
ENSG00000023734	STRAP	0.0836569	1.79307	0.473963	0.636367	0.908366	-5.56358
ENSG00000023892	DEF6	-0.177167	1.56327	-0.943276	0.34739	0.783437	-5.25571
ENSG00000023902	PLEKHO1	0.331536	2.24251	1.83225	0.0693341	0.517526	-4.20772
ENSG00000023909	GCLM	0.309435	1.79107	1.36773	0.17389	0.663788	-4.83689
ENSG00000024048	UBR2	-0.110216	1.45933	-0.68826	0.492585	0.860366	-5.43171
ENSG00000024862	CCDC28A	0.00531727	0.324992	0.0236473	0.981172	0.996457	-5.51395
ENSG00000025039	RRAGD	0.426278	1.77758	2.23879	0.026968	0.427222	-3.48211
ENSG00000025293	PHF20	0.292974	2.90069	1.81967	0.0712421	0.522993	-4.24377
ENSG00000025434	NR1H3	-0.0742946	2.48354	-0.270601	0.787151	0.953219	-5.66789
ENSG00000025708	TYMP	-0.0792631	6.12178	-0.500714	0.617468	0.904316	-5.59673
ENSG00000025770	NCAPH2	0.0166461	1.25879	0.105628	0.916049	0.983858	-5.6154
ENSG00000025796	SEC63	-0.0273597	2.16342	-0.169782	0.86546	0.97389	-5.6741
ENSG00000025800	KPNA6	0.00575965	0.843177	0.0334192	0.973395	0.995723	-5.57649
ENSG00000026025	VIM	-0.364851	7.63621	-2.13104	0.035077	0.447163	-3.69803
ENSG00000026103	FAS	0.750695	1.82864	3.4944	0.000661268	0.217153	-0.522513
ENSG00000026297	RNASET2	-0.10324	3.83146	-0.559575	0.576787	0.8894	-5.58286
ENSG00000026508	CD44	0.0610257	7.59672	0.370378	0.711738	0.932402	-5.63025
ENSG00000026652	AGPAT4	0.160376	1.02961	0.875082	0.383235	0.805976	-5.26003
ENSG00000026751	SLAMF7	1.25112	3.05081	3.36207	0.00103145	0.241423	-0.869819
ENSG00000026950	BTN3A1	0.479452	1.14567	2.2856	0.0239899	0.408575	-3.37306
ENSG00000027075	PRKCH	0.420789	4.27887	1.67207	0.0970525	0.580027	-4.47798
ENSG00000027697	IFNGR1	0.211124	4.17496	1.05946	0.291467	0.754674	-5.22031
ENSG00000027847	B4GALT7	-0.582249	0.28594	-2.14743	0.0337216	0.444097	-3.60228
ENSG00000027869	SH2D2A	0.498016	-0.418498	2.06383	0.0411376	0.455852	-3.71648
ENSG00000028116	VRK2	-0.129136	1.08668	-0.761263	0.447958	0.843052	-5.3528
ENSG00000028137	TNFRSF1B	0.306459	5.64266	1.08083	0.281887	0.750216	-5.1919
ENSG00000028203	VEZT	0.064766	1.45196	0.352714	0.724907	0.937926	-5.58054
ENSG00000028277	POU2F2	0.0610471	1.97965	0.253802	0.800072	0.955114	-5.6457
ENSG00000028310	BRD9	-0.00170734	1.77705	-0.00974887	0.992237	0.998139	-5.66364
ENSG00000028528	SNX1	0.109765	3.52785	0.565426	0.572814	0.887715	-5.5781
ENSG00000028839	TBPL1	0.564211	0.852101	2.59242	0.010685	0.324974	-2.75163
ENSG00000029153	ARNTL2	0.399944	0.352611	1.84274	0.0677754	0.513047	-4.09396
ENSG00000029363	BCLAF1	0.120763	2.91816	0.905694	0.366869	0.798466	-5.34502
ENSG00000029364	SLC39A9	-0.264431	0.802958	-2.01876	0.0456875	0.471357	-3.84338
ENSG00000029725	RABEP1	0.0829593	1.6258	0.554308	0.580375	0.891575	-5.51563
ENSG00000029993	HMGB3	0.0746972	2.07635	0.200768	0.841212	0.966716	-5.66257
ENSG00000030066	NUP160	0.237346	1.52873	1.27205	0.205756	0.6908	-4.93075
ENSG00000030110	BAK1	0.118438	0.303088	0.631681	0.528768	0.872904	-5.33741
ENSG00000030582	GRN	-0.36732	6.02878	-1.64175	0.103197	0.58425	-4.5118
ENSG00000031003	FAM13B	0.263979	1.95561	1.9213	0.0570079	0.503444	-4.05389
ENSG00000031081	ARHGAP31	0.113835	0.808652	0.477733	0.633689	0.908319	-5.47314
ENSG00000031698	SARS1	-0.189616	1.43857	-1.15111	0.251922	0.728562	-5.05779
ENSG00000031823	RANBP3	-0.210456	2.26824	-1.2898	0.199542	0.686335	-4.95352
ENSG00000032219	ARID4A	0.169162	1.64348	0.944494	0.346769	0.782846	-5.25744
ENSG00000032389	EIPR1	0.0486534	0.507242	0.239572	0.811061	0.958819	-5.50906
ENSG00000032444	PNPLA6	-0.500143	4.58896	-2.69042	0.0081285	0.316532	-2.55857
ENSG00000032742	IFT88	-0.184225	0.106042	-0.874965	0.383299	0.805976	-5.16443
ENSG00000033030	ZCCHC8	0.0564686	0.355029	0.35165	0.725703	0.938018	-5.46075
ENSG00000033050	ABCF2	-0.170139	0.176253	-0.638073	0.524613	0.872432	-5.32955
ENSG00000033100	CHPF2	0.0612814	1.16685	0.376835	0.706946	0.930517	-5.54917
ENSG00000033170	FUT8	0.033064	0.661228	0.1132	0.910057	0.983513	-5.55037
ENSG00000033178	UBA6	0.198441	1.923	0.959504	0.339188	0.782484	-5.26198
ENSG00000033327	GAB2	0.250365	3.64499	1.39331	0.166038	0.65652	-4.85528
ENSG00000033627	ATP6V0A1	0.0330722	3.28504	0.172732	0.863146	0.972954	-5.70657
ENSG00000033800	PIAS1	0.255354	2.78156	1.56313	0.120593	0.601238	-4.62261
ENSG00000033867	SLC4A7	-0.209226	0.362711	-0.998183	0.320151	0.774836	-5.10025
ENSG00000034152	MAP2K3	0.250898	5.17076	1.3251	0.187593	0.674869	-4.93409
ENSG00000034239	EFCAB1	-0.40479	0.3827	-1.1843	0.238577	0.716433	-4.93456
ENSG00000034510	TMSB10	-0.0392016	6.78665	-0.189099	0.850327	0.968937	-5.68556
ENSG00000034677	RNF19A	0.191234	2.85702	1.18733	0.237384	0.715808	-5.0813
ENSG00000034713	GABARAPL2	0.532705	3.90611	2.82315	0.00554852	0.303442	-2.25014
ENSG00000035115	SH3YL1	-0.290485	0.699374	-1.48694	0.139591	0.623754	-4.61983
ENSG00000035403	VCL	-0.0993301	1.05502	-0.555928	0.57927	0.890711	-5.46674
ENSG00000035664	DAPK2	-0.223022	1.21966	-0.817192	0.415399	0.827053	-5.32725
ENSG00000035681	NSMAF	0.563284	3.8177	2.57158	0.0113142	0.324974	-2.82473
ENSG00000035687	ADSS2	-0.0226104	1.2114	-0.146661	0.88364	0.977148	-5.6076
ENSG00000035862	TIMP2	-0.40918	3.18969	-1.93919	0.0547693	0.496479	-4.05008
ENSG00000035928	RFC1	0.360234	1.67304	1.87722	0.0628573	0.507955	-4.1133
ENSG00000036054	TBC1D23	0.255391	1.03673	1.29729	0.19696	0.685594	-4.86605
ENSG00000036257	CUL3	0.0372194	3.03184	0.221689	0.824924	0.962264	-5.69387
ENSG00000036549	AC118549.1	-0.172272	0.266933	-0.698525	0.486168	0.857866	-5.30226
ENSG00000037241	RPL26L1	-0.260643	0.622948	-1.00636	0.316219	0.773767	-5.12211
ENSG00000037474	NSUN2	-0.114868	1.2172	-0.719972	0.472909	0.851837	-5.39125
ENSG00000037637	FBXO42	-0.284584	0.337318	-1.87132	0.0636769	0.508607	-4.05594
ENSG00000037749	MFAP3	0.0117962	1.20442	0.0668238	0.946831	0.991193	-5.61196
ENSG00000037897	METTL1	-0.0960317	0.0232801	-0.365054	0.715698	0.933528	-5.41918
ENSG00000038210	PI4K2B	0.56564	0.0735435	2.04527	0.0429613	0.46083	-3.7596
ENSG00000038219	BOD1L1	0.0584208	2.4983	0.322912	0.747311	0.943265	-5.65315
ENSG00000038274	MAT2B	0.140084	1.77038	0.866428	0.387943	0.80892	-5.32882
ENSG00000038358	EDC4	0.0996685	1.50839	0.574914	0.5664	0.88469	-5.4963
ENSG00000038382	TRIO	-0.0897263	3.12725	-0.541077	0.589433	0.896294	-5.58575
ENSG00000038427	VCAN	-0.106566	4.16004	-0.350373	0.726658	0.938018	-5.66746
ENSG00000038532	CLEC16A	-0.0237085	1.33588	-0.153961	0.877893	0.975585	-5.61743
ENSG00000038945	MSR1	-0.973709	3.7697	-2.96906	0.00359202	0.282546	-1.89503
ENSG00000039068	CDH1	-0.365315	1.39014	-1.16602	0.245862	0.724687	-5.04156
ENSG00000039123	MTREX	-0.103589	1.08659	-0.628731	0.530691	0.872904	-5.43228
ENSG00000039319	ZFYVE16	0.390487	3.37946	1.51288	0.132876	0.612546	-4.6992
ENSG00000039523	RIPOR1	0.149516	2.92543	0.914173	0.362415	0.79466	-5.33892
ENSG00000039560	RAI14	-0.175238	0.357733	-0.656538	0.512705	0.869182	-5.33608
ENSG00000039650	PNKP	-0.102799	2.97426	-0.486169	0.627713	0.907912	-5.60775
ENSG00000040341	STAU2	0.10752	2.09711	0.552934	0.581313	0.891745	-5.54595
ENSG00000040487	SLC66A1	0.0133463	0.311453	0.0746353	0.940626	0.990013	-5.50764
ENSG00000040531	CTNS	0.290626	1.41921	1.66443	0.0985717	0.582429	-4.42485
ENSG00000040633	PHF23	0.178756	2.31073	1.06958	0.286904	0.75302	-5.18263
ENSG00000040933	INPP4A	-0.0164144	2.02852	-0.0940462	0.925225	0.985066	-5.67552
ENSG00000041357	PSMA4	0.246847	2.70752	1.09861	0.274083	0.743793	-5.16549
ENSG00000041802	LSG1	-0.0856448	0.508928	-0.477962	0.633526	0.908319	-5.44167
ENSG00000042062	RIPOR3	0.16266	0.244532	0.752059	0.453453	0.844932	-5.25687
ENSG00000042088	TDP1	0.0448451	0.382706	0.214415	0.830578	0.963835	-5.49918
ENSG00000042429	MED17	0.0940746	1.41927	0.781457	0.436036	0.840549	-5.36444
ENSG00000042445	RETSAT	-0.252509	0.889686	-1.80037	0.074254	0.530278	-4.19828
ENSG00000042493	CAPG	-0.395149	4.67516	-2.02107	0.045444	0.471357	-3.91214
ENSG00000042753	AP2S1	-0.51476	2.8331	-2.28924	0.0237706	0.406246	-3.40646
ENSG00000042832	TG	0.0350178	1.46324	0.132441	0.894852	0.979394	-5.63076
ENSG00000042980	ADAM28	0.262784	0.488694	1.09676	0.274889	0.74392	-5.01442
ENSG00000043093	DCUN1D1	0.0521537	1.2179	0.294539	0.768843	0.949741	-5.57821
ENSG00000043143	JADE2	-0.106919	0.794668	-0.530906	0.596442	0.898881	-5.45101
ENSG00000043462	LCP2	0.264631	6.76576	1.29957	0.196181	0.684296	-4.94984
ENSG00000044115	CTNNA1	-0.0781869	4.43979	-0.530924	0.596429	0.898881	-5.5966
ENSG00000044446	PHKA2	-0.255509	1.28516	-1.25874	0.210509	0.696219	-4.93411
ENSG00000044574	HSPA5	-0.132773	4.24945	-0.683862	0.495349	0.861926	-5.51309
ENSG00000046651	OFD1	-0.087963	0.520338	-0.461019	0.645599	0.91276	-5.44766
ENSG00000047056	WDR37	0.0827883	1.4767	0.541044	0.589456	0.896294	-5.50965
ENSG00000047188	YTHDC2	0.10933	0.508433	0.616499	0.538705	0.875952	-5.37449
ENSG00000047249	ATP6V1H	0.232362	2.65246	1.273	0.205419	0.690625	-4.9822
ENSG00000047315	POLR2B	0.0432633	1.38146	0.250134	0.802901	0.955912	-5.60406
ENSG00000047346	FAM214A	0.193329	1.20579	1.17422	0.242577	0.720061	-5.01153
ENSG00000047365	ARAP2	0.412259	1.84349	2.16108	0.0326273	0.441793	-3.62947
ENSG00000047410	TPR	0.071035	2.25742	0.48237	0.630401	0.908048	-5.58679
ENSG00000047457	CP	-0.435838	0.908319	-1.43057	0.155089	0.645969	-4.70939
ENSG00000047578	KIAA0556	-0.247325	1.8891	-1.45803	0.14738	0.635906	-4.73359
ENSG00000047579	DTNBP1	0.324758	1.33127	1.74389	0.0836769	0.558073	-4.30326
ENSG00000047621	C12orf4	-0.0860655	0.910809	-0.399174	0.690457	0.926373	-5.51515
ENSG00000047644	WWC3	-0.138678	0.798662	-0.902596	0.368505	0.80008	-5.222
ENSG00000047849	MAP4	-0.104405	1.94944	-0.644137	0.520686	0.87174	-5.48799
ENSG00000048052	HDAC9	-0.125817	0.542167	-0.45602	0.64918	0.913491	-5.45483
ENSG00000048342	CC2D2A	0.225229	3.33576	0.933974	0.352148	0.787475	-5.32866
ENSG00000048392	RRM2B	-0.490762	1.37738	-2.75449	0.00677147	0.316532	-2.4001
ENSG00000048405	ZNF800	-0.165401	1.04057	-1.00442	0.317147	0.774169	-5.16393
ENSG00000048471	SNX29	-0.216213	1.34208	-1.14563	0.254171	0.730823	-5.05603
ENSG00000048649	RSF1	-0.033637	2.18128	-0.221309	0.825219	0.962381	-5.6654
ENSG00000048707	VPS13D	0.34588	2.2714	1.92017	0.0571528	0.503444	-4.06574
ENSG00000048740	CELF2	-0.0650803	2.67036	-0.379564	0.704924	0.930203	-5.6409
ENSG00000048828	FAM120A	-0.105722	2.75689	-0.618028	0.5377	0.875535	-5.53706
ENSG00000048991	R3HDM1	-0.151372	1.79606	-0.581433	0.562013	0.883023	-5.51532
ENSG00000049089	COL9A2	-0.329	0.514349	-1.18414	0.238642	0.716433	-4.94896
ENSG00000049239	H6PD	-0.33912	0.718246	-2.27657	0.0245409	0.413666	-3.38116
ENSG00000049245	VAMP3	0.0640938	3.40942	0.29698	0.766983	0.949333	-5.68213
ENSG00000049540	ELN	-0.0631071	1.44475	-0.194001	0.846495	0.968474	-5.61889
ENSG00000049541	RFC2	-0.235263	0.633567	-1.37591	0.171351	0.65993	-4.74793
ENSG00000049618	ARID1B	-0.103379	2.31281	-0.716419	0.475091	0.852543	-5.46473
ENSG00000049656	CLPTM1L	-0.0344213	3.40102	-0.217685	0.828035	0.9627	-5.6998
ENSG00000049759	NEDD4L	-0.0479802	1.98015	-0.184686	0.85378	0.970173	-5.6615
ENSG00000049860	HEXB	-0.406694	3.72437	-1.87991	0.0624862	0.507955	-4.15266
ENSG00000050130	JKAMP	-0.00279946	0.95281	-0.016141	0.987148	0.997666	-5.58894
ENSG00000050327	ARHGEF5	-0.524841	0.535342	-1.88028	0.0624358	0.507955	-4.05667
ENSG00000050344	NFE2L3	0.225912	1.69547	0.969193	0.334351	0.782225	-5.24016
ENSG00000050405	LIMA1	-0.328163	0.575788	-1.44213	0.151808	0.642542	-4.66615
ENSG00000050426	LETMD1	-0.042966	1.01752	-0.253896	0.8	0.955114	-5.56822
ENSG00000050438	SLC4A8	-0.456606	0.646781	-1.85974	0.0653117	0.511446	-4.09304
ENSG00000050730	TNIP3	0.729821	2.90332	1.90572	0.0590216	0.506762	-4.10192
ENSG00000050748	MAPK9	-0.212067	0.985391	-1.08349	0.28071	0.748953	-5.08698
ENSG00000050820	BCAR1	-1.02291	1.10879	-3.02457	0.00303196	0.276358	-1.76428
ENSG00000051009	FAM160A2	0.0423231	1.91761	0.209984	0.834027	0.964228	-5.65213
ENSG00000051108	HERPUD1	0.363317	3.37382	1.96043	0.0522072	0.48815	-4.01678
ENSG00000051128	HOMER3	0.0612107	1.61705	0.324615	0.746024	0.942793	-5.60441
ENSG00000051382	PIK3CB	-0.0470279	1.68152	-0.286644	0.774867	0.950757	-5.62151
ENSG00000051523	CYBA	-0.216237	6.5762	-1.52669	0.129407	0.607945	-4.6677
ENSG00000051596	THOC3	-0.058511	0.784552	-0.209102	0.834715	0.964228	-5.5519
ENSG00000051620	HEBP2	-0.00313463	1.62973	-0.0156823	0.987513	0.997726	-5.65295
ENSG00000051825	MPHOSPH9	-0.190997	0.433448	-0.780793	0.436425	0.840549	-5.27111
ENSG00000052126	PLEKHA5	-0.0705582	0.517811	-0.277354	0.781974	0.951044	-5.50428
ENSG00000052344	PRSS8	-0.0286763	0.467998	-0.105725	0.915973	0.983858	-5.52766
ENSG00000052723	SIKE1	0.282679	0.287191	1.3082	0.193244	0.680383	-4.7835
ENSG00000052749	RRP12	-0.0249005	2.41802	-0.148706	0.882029	0.976791	-5.68701
ENSG00000052795	FNIP2	0.402468	2.83906	1.88346	0.062	0.507955	-4.13847
ENSG00000052802	MSMO1	-0.447021	0.345826	-2.03988	0.0435041	0.462978	-3.78702
ENSG00000052841	TTC17	0.0459008	1.49919	0.279409	0.7804	0.950951	-5.60674
ENSG00000053254	FOXN3	0.158376	3.32129	1.04011	0.300328	0.759813	-5.23538
ENSG00000053371	AKR7A2	-0.243113	0.412975	-1.07361	0.285102	0.752075	-5.04028
ENSG00000053501	USE1	-0.433359	0.995502	-2.50709	0.0134774	0.34114	-2.93328
ENSG00000053524	MCF2L2	0.348405	1.04066	1.47111	0.143816	0.630611	-4.65498
ENSG00000053770	AP5M1	-0.092503	0.802026	-0.512901	0.608941	0.902094	-5.45971
ENSG00000053900	ANAPC4	-0.219397	0.596597	-1.13349	0.259215	0.733485	-5.00592
ENSG00000053918	KCNQ1	-0.394514	0.913659	-1.87112	0.0637051	0.508607	-4.09112
ENSG00000054116	TRAPPC3	-0.0339494	1.62268	-0.189393	0.850097	0.968937	-5.63711
ENSG00000054118	THRAP3	0.0315502	2.66903	0.233317	0.815903	0.960736	-5.68193
ENSG00000054148	PHPT1	-0.320859	1.13484	-1.07079	0.286363	0.752525	-5.11372
ENSG00000054267	ARID4B	0.348246	2.98308	1.85719	0.0656765	0.511446	-4.18456
ENSG00000054277	OPN3	-0.541816	1.12442	-2.13646	0.0346234	0.447163	-3.65414
ENSG00000054282	SDCCAG8	0.250486	2.14495	1.46342	0.145904	0.632866	-4.73495
ENSG00000054523	KIF1B	0.0578342	2.33802	0.417684	0.676907	0.92343	-5.61605
ENSG00000054611	TBC1D22A	0.130155	1.66594	0.959156	0.339362	0.782484	-5.24795
ENSG00000054654	SYNE2	-0.155384	2.87444	-0.810184	0.419399	0.828566	-5.41755
ENSG00000054965	FAM168A	-0.0858177	1.55435	-0.504331	0.614931	0.903269	-5.53508
ENSG00000054967	RELT	-0.173152	3.30731	-0.785167	0.433866	0.840023	-5.44356
ENSG00000054983	GALC	0.438236	3.12444	2.44407	0.0159413	0.361964	-3.09514
ENSG00000055044	NOP58	0.13451	1.38752	0.802823	0.423626	0.831209	-5.34781
ENSG00000055070	SZRD1	-0.078254	2.67202	-0.496497	0.62043	0.904683	-5.59649
ENSG00000055130	CUL1	0.269731	1.09414	1.36056	0.176142	0.6669	-4.79805
ENSG00000055147	FAM114A2	0.151855	0.660734	0.790988	0.430474	0.837302	-5.28248
ENSG00000055163	CYFIP2	-0.0629064	3.58468	-0.267811	0.789294	0.953343	-5.69158
ENSG00000055208	TAB2	0.43375	3.11226	2.42347	0.0168294	0.366523	-3.13802
ENSG00000055211	GINM1	-0.0809477	0.375853	-0.42152	0.674111	0.922336	-5.44545
ENSG00000055332	EIF2AK2	0.74828	2.02838	3.32811	0.00115384	0.243045	-0.972604
ENSG00000055483	AC022966.1	0.0345789	2.58855	0.217792	0.827952	0.9627	-5.68377
ENSG00000055609	KMT2C	-0.00558203	3.01919	-0.0416066	0.96688	0.994956	-5.71489
ENSG00000055917	PUM2	0.14976	2.23838	0.932832	0.352735	0.787873	-5.3007
ENSG00000055950	MRPL43	-0.209596	0.560627	-0.960766	0.338555	0.782475	-5.15299
ENSG00000055955	ITIH4	0.0568258	0.436669	0.203214	0.839303	0.965603	-5.50395
ENSG00000056097	ZFR	0.0244857	1.81264	0.173773	0.86233	0.972729	-5.65165
ENSG00000056558	TRAF1	0.809133	1.98352	2.32629	0.0216397	0.388785	-3.31509
ENSG00000056586	RC3H2	-0.207432	1.95218	-0.951918	0.343006	0.782846	-5.27444
ENSG00000056972	TRAF3IP2	0.0465828	1.54622	0.238146	0.812165	0.959662	-5.62041
ENSG00000057019	DCBLD2	-0.171755	0.283353	-0.565021	0.573089	0.887715	-5.3764
ENSG00000057149	SERPINB3	-0.698737	0.93885	-1.57085	0.118787	0.599045	-4.53337
ENSG00000057252	SOAT1	-0.104722	2.33851	-0.427298	0.66991	0.920904	-5.61025
ENSG00000057608	GDI2	-0.118074	3.3232	-0.7197	0.473075	0.851837	-5.48643
ENSG00000057657	PRDM1	0.552592	1.7564	2.68617	0.00822667	0.316532	-2.55539
ENSG00000057663	ATG5	0.0231763	0.638849	0.128878	0.897664	0.979957	-5.54427
ENSG00000057704	TMCC3	0.220446	2.29371	0.949938	0.344007	0.782846	-5.28834
ENSG00000057757	PITHD1	-0.10738	0.655648	-0.6039	0.547023	0.878669	-5.3991
ENSG00000058063	ATP11B	0.296543	3.67968	1.80243	0.0739277	0.529998	-4.27857
ENSG00000058091	CDK14	0.0220193	1.55045	0.116144	0.907728	0.982914	-5.63865
ENSG00000058262	SEC61A1	-0.0234644	2.44168	-0.123914	0.901585	0.980467	-5.69045
ENSG00000058272	PPP1R12A	0.193	3.89286	1.31095	0.192319	0.680038	-4.95472
ENSG00000058453	CROCC	-0.522746	2.05588	-2.06002	0.0415061	0.455852	-3.82241
ENSG00000058600	POLR3E	-0.220889	0.92492	-1.0444	0.298348	0.758515	-5.11772
ENSG00000058668	ATP2B4	-0.0633207	1.84415	-0.355957	0.722482	0.936298	-5.61228
ENSG00000058673	ZC3H11A	0.237977	2.41309	1.4177	0.158809	0.646643	-4.80325
ENSG00000058799	YIPF1	0.292085	1.17314	1.8482	0.0669755	0.512327	-4.13446
ENSG00000059122	FLYWCH1	-0.329473	1.01561	-1.46449	0.145612	0.63262	-4.67262
ENSG00000059145	UNKL	0.0444847	1.63642	0.212981	0.831695	0.964077	-5.63206
ENSG00000059377	TBXAS1	0.00947685	4.0685	0.0531711	0.957682	0.99372	-5.72307
ENSG00000059378	PARP12	0.348409	2.44564	1.35522	0.177833	0.668754	-4.87695
ENSG00000059728	MXD1	0.27944	6.12062	1.04082	0.300002	0.759573	-5.22525
ENSG00000059758	CDK17	0.207549	2.07254	1.12723	0.261842	0.734798	-5.11534
ENSG00000059804	SLC2A3	0.0135736	6.21033	0.0571048	0.954554	0.992868	-5.7072
ENSG00000059915	PSD	0.385724	0.835992	1.56843	0.119351	0.599598	-4.51469
ENSG00000060069	CTDP1	0.341097	2.44453	1.99331	0.0484411	0.475683	-3.94635
ENSG00000060138	YBX3	-0.245745	4.0123	-1.46788	0.14469	0.631865	-4.76045
ENSG00000060237	WNK1	-0.218828	4.02662	-1.85286	0.0662998	0.512187	-4.19803
ENSG00000060339	CCAR1	0.0144264	1.91881	0.0941402	0.925151	0.985066	-5.66794
ENSG00000060491	OGFR	0.21879	2.8995	1.06015	0.291153	0.754674	-5.20942
ENSG00000060558	GNA15	-0.0496263	2.64507	-0.271627	0.786364	0.952735	-5.67271
ENSG00000060642	PIGV	0.0591736	-0.163217	0.31083	0.756456	0.946795	-5.40347
ENSG00000060656	PTPRU	-0.133553	0.28121	-0.41363	0.679865	0.924093	-5.43713
ENSG00000060688	SNRNP40	-0.33126	0.513557	-1.72605	0.086851	0.562406	-4.28421
ENSG00000060762	MPC1	0.0247823	0.737881	0.105345	0.916274	0.983858	-5.56184
ENSG00000060971	ACAA1	0.125833	3.36189	0.789009	0.431625	0.837886	-5.44153
ENSG00000060982	BCAT1	-0.0656744	2.30551	-0.359115	0.720125	0.935207	-5.63422
ENSG00000061273	HDAC7	-0.216742	2.79989	-1.3102	0.192569	0.680038	-4.94423
ENSG00000061936	SFSWAP	-0.114814	1.72927	-0.759008	0.4493	0.843301	-5.40569
ENSG00000061938	TNK2	-0.212075	2.17552	-1.07773	0.283262	0.751081	-5.17072
ENSG00000061987	MON2	0.117966	1.6813	0.718354	0.473902	0.852169	-5.42617
ENSG00000062038	CDH3	-0.202224	-0.0718081	-0.789615	0.431273	0.837532	-5.20273
ENSG00000062194	GPBP1	0.517985	2.92253	2.78947	0.00612078	0.310634	-2.32752
ENSG00000062282	DGAT2	-0.0626433	3.70407	-0.217045	0.828533	0.962908	-5.70287
ENSG00000062485	CS	-0.27612	2.70691	-1.88372	0.0619651	0.507955	-4.1378
ENSG00000062582	MRPS24	-0.0876483	1.45619	-0.395632	0.693062	0.926795	-5.57086
ENSG00000062598	ELMO2	-0.0226946	2.1099	-0.145516	0.884542	0.977374	-5.67229
ENSG00000062650	WAPL	-0.11658	1.42328	-0.654248	0.514174	0.869182	-5.44881
ENSG00000062716	VMP1	0.16386	5.45569	0.90071	0.369503	0.800303	-5.35266
ENSG00000062725	APPBP2	-0.220478	0.878253	-1.4721	0.14355	0.630605	-4.65198
ENSG00000062822	POLD1	-0.561779	0.325402	-2.64597	0.00921018	0.323804	-2.64019
ENSG00000063015	SEZ6	0.307523	-0.0133904	1.28648	0.200692	0.688847	-4.77271
ENSG00000063046	EIF4B	-0.260728	3.43115	-1.92397	0.0566691	0.503444	-4.07916
ENSG00000063169	BICRA	-0.264591	0.412666	-1.46222	0.146231	0.633267	-4.6243
ENSG00000063177	RPL18	-0.178561	4.65232	-0.845707	0.399359	0.81703	-5.401
ENSG00000063241	ISOC2	-0.411534	0.901658	-1.65244	0.100996	0.583525	-4.41699
ENSG00000063244	U2AF2	-0.28039	3.20329	-1.66205	0.099049	0.583417	-4.48808
ENSG00000063245	EPN1	-0.232423	2.47379	-1.47556	0.142619	0.630417	-4.73189
ENSG00000063322	MED29	-0.00603693	1.6723	-0.0381594	0.969622	0.995668	-5.65375
ENSG00000063601	MTMR1	0.0400461	0.853589	0.249587	0.803324	0.955912	-5.54864
ENSG00000063854	HAGH	-0.12835	1.58544	-0.66726	0.505856	0.86604	-5.45498
ENSG00000063978	RNF4	0.0494488	2.19146	0.319624	0.749796	0.945064	-5.64087
ENSG00000064012	CASP8	0.0871792	2.5273	0.535612	0.593194	0.898431	-5.57196
ENSG00000064115	TM7SF3	0.0810759	1.76175	0.390277	0.697007	0.927458	-5.59386
ENSG00000064225	ST3GAL6	-0.00365368	2.27336	-0.0183978	0.985351	0.997666	-5.69206
ENSG00000064270	ATP2C2	-0.0381827	1.58397	-0.123725	0.901735	0.980467	-5.64281
ENSG00000064313	TAF2	-0.066357	1.2818	-0.406527	0.685062	0.924093	-5.55245
ENSG00000064393	HIPK2	-0.434062	1.85685	-2.14317	0.0340688	0.445264	-3.66518
ENSG00000064419	TNPO3	-0.0580523	0.944435	-0.326045	0.744944	0.942572	-5.54266
ENSG00000064490	RFXANK	-0.291326	1.36613	-1.37735	0.170905	0.65976	-4.80517
ENSG00000064547	LPAR2	-0.317591	3.06681	-1.142	0.255673	0.732062	-5.13289
ENSG00000064601	CTSA	-0.380391	4.17099	-2.12969	0.0351901	0.447163	-3.71747
ENSG00000064607	SUGP2	-0.491677	1.00943	-2.86625	0.00488774	0.28659	-2.14366
ENSG00000064666	CNN2	-0.111938	5.22372	-0.716647	0.474951	0.852543	-5.48763
ENSG00000064687	ABCA7	-0.379225	2.57684	-2.09357	0.0383532	0.450994	-3.77375
ENSG00000064726	BTBD1	-0.149311	2.22393	-0.57744	0.564698	0.884328	-5.54111
ENSG00000064763	FAR2	-0.144278	1.99734	-0.863834	0.389361	0.809916	-5.34609
ENSG00000064886	CHI3L2	0.403182	0.0645629	1.67107	0.0972517	0.58021	-4.31942
ENSG00000064932	SBNO2	0.0416072	5.08767	0.228073	0.819969	0.96181	-5.69649
ENSG00000064961	HMG20B	-0.454126	1.47946	-2.5378	0.0124049	0.330933	-2.87731
ENSG00000064995	TAF11	0.0444688	0.314839	0.301434	0.763593	0.948778	-5.4729
ENSG00000064999	ANKS1A	-0.0984543	1.11836	-0.643356	0.521191	0.87174	-5.42707
ENSG00000065000	AP3D1	-0.0637848	3.02698	-0.492467	0.623268	0.905194	-5.60678
ENSG00000065029	ZNF76	-0.031767	0.737823	-0.220229	0.826058	0.962415	-5.54245
ENSG00000065054	SLC9A3R2	-0.596639	0.860907	-2.09552	0.0381757	0.450859	-3.71617
ENSG00000065135	GNAI3	0.111529	1.33132	0.647191	0.518715	0.871265	-5.44104
ENSG00000065150	IPO5	-0.0319788	1.27024	-0.189141	0.850294	0.968937	-5.60605
ENSG00000065154	OAT	-0.120125	1.62618	-0.645085	0.520074	0.871584	-5.47052
ENSG00000065243	PKN2	0.0185376	1.54096	0.118562	0.905816	0.98289	-5.63946
ENSG00000065268	WDR18	-0.420276	0.514284	-1.62046	0.107695	0.587625	-4.43377
ENSG00000065357	DGKA	-0.0225863	3.30389	-0.0946848	0.924719	0.985066	-5.71625
ENSG00000065361	ERBB3	0.107704	1.94078	0.314328	0.753805	0.946504	-5.62786
ENSG00000065413	ANKRD44	0.0409991	3.07478	0.194448	0.846146	0.968474	-5.69965
ENSG00000065427	KARS1	0.00311427	1.86015	0.0163642	0.98697	0.997666	-5.66715
ENSG00000065457	ADAT1	0.371057	2.21365	1.79245	0.0755192	0.533293	-4.26928
ENSG00000065518	NDUFB4	-0.213703	2.20409	-0.970092	0.333905	0.782225	-5.26923
ENSG00000065526	SPEN	-0.124071	1.77386	-0.809078	0.420033	0.828566	-5.37388
ENSG00000065548	ZC3H15	-0.0233836	1.80418	-0.139223	0.889502	0.978863	-5.65715
ENSG00000065559	MAP2K4	-0.0324795	1.4281	-0.167873	0.866959	0.974257	-5.62562
ENSG00000065600	PACC1	0.265092	0.0231748	1.19586	0.234053	0.713098	-4.873
ENSG00000065613	SLK	0.230061	2.10058	1.27273	0.205515	0.690709	-4.96301
ENSG00000065615	CYB5R4	0.4433	2.88474	2.3248	0.0217221	0.388785	-3.33668
ENSG00000065621	GSTO2	-0.033163	0.812825	-0.142982	0.886538	0.978603	-5.56341
ENSG00000065665	SEC61A2	-0.182288	0.113154	-0.776541	0.438921	0.841443	-5.23375
ENSG00000065717	TLE2	-0.293987	0.144028	-0.964058	0.336909	0.782475	-5.10255
ENSG00000065802	ASB1	-0.230938	0.466622	-1.19043	0.236169	0.714492	-4.93252
ENSG00000065809	FAM107B	0.25217	4.40519	1.60412	0.111252	0.587625	-4.57588
ENSG00000065882	TBC1D1	0.0748297	3.09742	0.535179	0.593493	0.898431	-5.58811
ENSG00000065883	CDK13	-0.0563842	2.15642	-0.418747	0.676131	0.923268	-5.60846
ENSG00000065911	MTHFD2	0.105969	2.47382	0.510291	0.610762	0.902619	-5.58228
ENSG00000065923	SLC9A7	-0.242001	-0.0863031	-1.02226	0.308664	0.76846	-5.03055
ENSG00000065970	FOXJ2	-0.0530619	0.361022	-0.363397	0.716932	0.934147	-5.45955
ENSG00000065978	YBX1	-0.691565	4.88184	-3.01803	0.00309344	0.277714	-1.77293
ENSG00000065989	PDE4A	-0.023896	1.54541	-0.145936	0.884211	0.977169	-5.636
ENSG00000066027	PPP2R5A	0.175819	1.54811	1.03684	0.301843	0.761624	-5.17062
ENSG00000066044	ELAVL1	0.0300899	1.10547	0.167051	0.867605	0.974257	-5.592
ENSG00000066084	DIP2B	0.222732	1.92005	1.2526	0.212726	0.696268	-4.9754
ENSG00000066117	SMARCD1	0.0402251	1.1703	0.24595	0.806131	0.956961	-5.58469
ENSG00000066135	KDM4A	0.0829347	0.385522	0.495034	0.621459	0.905007	-5.41248
ENSG00000066136	NFYC	-0.0569411	2.55659	-0.430993	0.667228	0.920064	-5.61874
ENSG00000066294	CD84	0.402158	0.974072	1.65035	0.101423	0.583525	-4.41463
ENSG00000066322	ELOVL1	-0.191642	2.10122	-1.10198	0.272623	0.743142	-5.1429
ENSG00000066336	SPI1	-0.160104	6.23688	-1.05773	0.292253	0.755332	-5.20744
ENSG00000066379	ZNRD1	0.310682	0.177449	1.3391	0.183008	0.672144	-4.73938
ENSG00000066422	ZBTB11	-0.174525	0.325949	-1.18247	0.2393	0.716433	-4.92608
ENSG00000066427	ATXN3	-0.0682674	1.73954	-0.328404	0.743165	0.941868	-5.61367
ENSG00000066455	GOLGA5	0.22454	0.420022	1.06067	0.290919	0.754674	-5.04571
ENSG00000066629	EML1	-0.555331	0.524324	-2.00023	0.0476791	0.47546	-3.863
ENSG00000066654	THUMPD1	-0.242277	0.723243	-1.33621	0.183948	0.672382	-4.8023
ENSG00000066739	ATG2B	-0.161284	0.186957	-0.827774	0.409402	0.822649	-5.20804
ENSG00000066777	ARFGEF1	-0.104594	2.01485	-0.713868	0.476661	0.853459	-5.45247
ENSG00000066827	ZFAT	0.274438	0.44606	1.30689	0.193689	0.680553	-4.80119
ENSG00000066855	MTFR1	0.429213	1.28201	1.99775	0.0479506	0.475683	-3.89676
ENSG00000066923	STAG3	-0.0156455	1.58457	-0.0869296	0.930869	0.987075	-5.64646
ENSG00000066933	MYO9A	0.00708445	0.9518	0.0333493	0.97345	0.995723	-5.5867
ENSG00000067048	DDX3Y	0.19024	0.808828	0.797972	0.426425	0.833418	-5.27749
ENSG00000067057	PFKP	0.0287744	2.13678	0.136789	0.891421	0.979219	-5.67585
ENSG00000067064	IDI1	0.226492	2.26029	1.1415	0.255879	0.732062	-5.10893
ENSG00000067066	SP100	0.276324	4.46838	1.69671	0.0922816	0.571324	-4.44117
ENSG00000067082	KLF6	0.219252	5.55067	1.41224	0.160405	0.649604	-4.82542
ENSG00000067167	TRAM1	0.0571879	2.43428	0.28311	0.777568	0.950951	-5.66155
ENSG00000067182	TNFRSF1A	-0.249915	5.09827	-1.40563	0.162355	0.652601	-4.83617
ENSG00000067208	EVI5	-0.0925302	1.68483	-0.475176	0.635504	0.908319	-5.5581
ENSG00000067225	PKM	-0.256244	5.84781	-1.53123	0.128282	0.607423	-4.66781
ENSG00000067334	DNTTIP2	0.163388	2.68971	0.80925	0.419934	0.828566	-5.4139
ENSG00000067365	METTL22	-0.32679	2.41514	-1.76202	0.0805508	0.549277	-4.32479
ENSG00000067369	TP53BP1	0.167968	1.71878	1.09179	0.277059	0.74559	-5.13095
ENSG00000067560	RHOA	0.139035	6.01039	0.857315	0.392938	0.813061	-5.38156
ENSG00000067596	DHX8	0.153188	1.80638	0.861056	0.390883	0.810939	-5.33469
ENSG00000067606	PRKCZ	-0.205602	0.944967	-0.741184	0.459995	0.848771	-5.35277
ENSG00000067704	IARS2	-0.386426	0.426944	-1.91225	0.0581708	0.504905	-3.99897
ENSG00000067798	NAV3	-0.0984938	0.266622	-0.256925	0.797666	0.954349	-5.47702
ENSG00000067829	IDH3G	-0.158294	1.64942	-0.797892	0.426471	0.833418	-5.37122
ENSG00000067836	ROGDI	-0.72148	0.826844	-3.4538	0.000758877	0.217153	-0.670968
ENSG00000067900	ROCK1	0.189707	2.99743	1.36874	0.173575	0.663595	-4.87793
ENSG00000067955	CBFB	-0.25867	2.49272	-1.47412	0.143005	0.630605	-4.73492
ENSG00000068024	HDAC4	0.07989	3.54951	0.445525	0.656724	0.915433	-5.63353
ENSG00000068028	RASSF1	0.00260482	0.181613	0.014172	0.988716	0.997941	-5.49118
ENSG00000068079	IFI35	0.114284	2.14182	0.452337	0.651823	0.913526	-5.59042
ENSG00000068097	HEATR6	0.095529	0.997514	0.520484	0.603662	0.901194	-5.47387
ENSG00000068120	COASY	-0.161702	1.35858	-0.987747	0.325216	0.778805	-5.20414
ENSG00000068305	MEF2A	0.200744	2.38065	1.20102	0.232051	0.711845	-5.05213
ENSG00000068308	OTUD5	0.223966	2.20761	1.36121	0.175936	0.6669	-4.8647
ENSG00000068323	TFE3	0.166359	3.35224	0.925831	0.356347	0.790597	-5.33607
ENSG00000068366	ACSL4	0.291308	3.13853	1.61788	0.10825	0.587625	-4.55168
ENSG00000068383	INPP5A	0.680178	1.78804	2.69685	0.00798204	0.316532	-2.53135
ENSG00000068400	GRIPAP1	0.0536125	3.10464	0.360131	0.719367	0.935091	-5.65931
ENSG00000068438	FTSJ1	0.103874	0.448164	0.498618	0.618939	0.904316	-5.41746
ENSG00000068650	ATP11A	0.0935769	3.61066	0.566215	0.57228	0.887715	-5.57887
ENSG00000068654	POLR1A	-0.207768	0.392947	-0.874651	0.383469	0.805976	-5.19956
ENSG00000068697	LAPTM4A	-0.27691	3.08004	-1.32583	0.187354	0.67483	-4.9302
ENSG00000068724	TTC7A	-0.328044	1.74393	-1.78288	0.0770723	0.536454	-4.26974
ENSG00000068745	IP6K2	0.237887	2.28451	1.68187	0.0951323	0.576642	-4.44013
ENSG00000068784	SRBD1	0.290926	0.602878	1.40011	0.163997	0.65466	-4.70915
ENSG00000068796	KIF2A	0.295526	0.984692	1.56732	0.119609	0.599598	-4.52985
ENSG00000068831	RASGRP2	-0.365409	2.49398	-1.69742	0.0921469	0.571324	-4.42534
ENSG00000068878	PSME4	-0.0650845	1.70929	-0.33757	0.736263	0.939297	-5.60889
ENSG00000068885	IFT80	0.227222	0.989125	1.01022	0.314376	0.770789	-5.14545
ENSG00000068903	SIRT2	-0.125578	2.19386	-0.850679	0.396601	0.816354	-5.36622
ENSG00000068912	ERLEC1	0.258369	0.802642	1.36871	0.173584	0.663595	-4.76524
ENSG00000068971	PPP2R5B	-0.00620405	0.713171	-0.0311184	0.975226	0.996457	-5.56175
ENSG00000068976	PYGM	-0.326976	0.160833	-1.21404	0.227058	0.708676	-4.87939
ENSG00000069011	PITX1	-0.599641	0.263592	-2.06142	0.0413704	0.455852	-3.74828
ENSG00000069020	MAST4	-0.352093	0.787009	-1.27415	0.205012	0.690401	-4.87746
ENSG00000069248	NUP133	0.0702537	1.00038	0.369144	0.712655	0.932579	-5.53327
ENSG00000069275	NUCKS1	-0.358156	0.937711	-1.42792	0.155849	0.645969	-4.71302
ENSG00000069329	VPS35	-0.271792	2.47221	-2.07542	0.0400325	0.455536	-3.8042
ENSG00000069345	DNAJA2	-0.220448	2.07374	-1.92678	0.056314	0.503444	-4.05176
ENSG00000069399	BCL3	0.227698	5.39383	1.19255	0.235343	0.714492	-5.08074
ENSG00000069424	KCNAB2	-0.104211	3.7789	-0.536302	0.592718	0.898064	-5.59483
ENSG00000069493	CLEC2D	0.418091	1.00702	1.96542	0.0516202	0.487173	-3.93559
ENSG00000069667	RORA	0.110426	0.64094	0.452038	0.652038	0.913526	-5.46116
ENSG00000069849	ATP1B3	0.0285645	3.35412	0.14628	0.88394	0.977148	-5.70993
ENSG00000069869	NEDD4	0.0554407	4.08748	0.130536	0.896356	0.979597	-5.71655
ENSG00000069943	PIGB	0.11447	1.73297	0.531511	0.596024	0.898881	-5.53355
ENSG00000069956	MAPK6	0.515551	2.70492	3.12064	0.00224917	0.274603	-1.51189
ENSG00000069974	RAB27A	0.115252	3.01265	0.557404	0.578264	0.890028	-5.57618
ENSG00000070010	UFD1	0.0327999	1.98941	0.204187	0.838545	0.965342	-5.65808
ENSG00000070047	PHRF1	-0.142259	0.90775	-0.911953	0.363578	0.79466	-5.2263
ENSG00000070081	NUCB2	-0.025215	2.66143	-0.116165	0.907711	0.982914	-5.70078
ENSG00000070087	PFN2	-0.258867	0.998559	-1.06444	0.289215	0.754581	-5.10803
ENSG00000070190	DAPP1	0.615041	1.67832	2.99163	0.00335375	0.282546	-1.84045
ENSG00000070214	SLC44A1	-0.0400099	0.409406	-0.211683	0.832704	0.964159	-5.50566
ENSG00000070269	TMEM260	0.0808773	1.36635	0.44234	0.65902	0.916428	-5.54173
ENSG00000070366	SMG6	0.145499	1.48474	0.755441	0.451429	0.844487	-5.38712
ENSG00000070367	EXOC5	-0.0409492	1.67703	-0.248374	0.804259	0.955944	-5.6287
ENSG00000070413	DGCR2	-0.105079	1.38708	-0.582972	0.56098	0.883023	-5.48198
ENSG00000070423	RNF126	-0.468099	0.760273	-2.5602	0.0116716	0.324974	-2.81986
ENSG00000070444	MNT	-0.126629	2.58278	-0.628683	0.530722	0.872904	-5.52731
ENSG00000070476	ZXDC	-0.155791	1.06981	-1.09522	0.275562	0.74394	-5.08279
ENSG00000070495	JMJD6	0.134057	2.96436	0.737955	0.461948	0.849458	-5.46996
ENSG00000070501	POLB	0.460012	1.71448	2.31198	0.0224418	0.39569	-3.33869
ENSG00000070526	ST6GALNAC1	-0.152964	0.69924	-0.560223	0.576346	0.889272	-5.42753
ENSG00000070540	WIPI1	-0.0758647	2.22484	-0.425273	0.671381	0.921192	-5.60943
ENSG00000070610	GBA2	-0.0257818	2.09658	-0.191293	0.848612	0.968678	-5.66693
ENSG00000070614	NDST1	-0.158128	2.23988	-0.811467	0.418665	0.828503	-5.39742
ENSG00000070669	ASNS	-0.270035	0.0180188	-1.17643	0.241697	0.719085	-4.90218
ENSG00000070729	CNGB1	0.401946	0.571708	1.29056	0.199277	0.686128	-4.82106
ENSG00000070731	ST6GALNAC2	-0.149589	1.63949	-0.764236	0.44619	0.842018	-5.39641
ENSG00000070756	PABPC1	-0.264178	5.43527	-1.79848	0.0745535	0.530278	-4.27991
ENSG00000070761	CFAP20	0.00427154	0.171683	0.0173646	0.986174	0.997666	-5.49447
ENSG00000070770	CSNK2A2	-0.0995569	1.21868	-0.579538	0.563286	0.883805	-5.47016
ENSG00000070814	TCOF1	-0.253119	0.53136	-1.34742	0.180321	0.669591	-4.77225
ENSG00000070831	CDC42	0.0277207	4.88366	0.238783	0.811672	0.959426	-5.69582
ENSG00000070882	OSBPL3	-0.0871421	1.46353	-0.46024	0.646157	0.912787	-5.54707
ENSG00000070961	ATP2B1	0.33982	4.1961	1.41012	0.161028	0.650721	-4.83501
ENSG00000071051	NCK2	-0.0694291	1.14333	-0.396753	0.692238	0.926748	-5.54202
ENSG00000071054	MAP4K4	0.568414	4.51888	3.01584	0.00311428	0.277714	-1.77861
ENSG00000071073	MGAT4A	0.110665	1.24975	0.472633	0.637313	0.90897	-5.52001
ENSG00000071082	RPL31	-0.170318	4.94322	-0.724549	0.470105	0.850924	-5.48457
ENSG00000071127	WDR1	-0.0203175	5.58719	-0.208422	0.835244	0.964276	-5.69577
ENSG00000071189	SNX13	0.11639	2.00168	0.789784	0.431174	0.837532	-5.39888
ENSG00000071205	ARHGAP10	0.0211396	0.327742	0.0978077	0.922244	0.984129	-5.50735
ENSG00000071243	ING3	0.407885	0.203849	2.1955	0.0300047	0.435248	-3.50979
ENSG00000071246	VASH1	-0.176453	0.533552	-0.76671	0.444723	0.84156	-5.29189
ENSG00000071462	BUD23	-0.130308	1.70387	-0.712122	0.477738	0.853963	-5.43452
ENSG00000071537	SEL1L	-0.231629	2.61341	-1.14711	0.253561	0.729862	-5.11604
ENSG00000071553	ATP6AP1	-0.0671055	3.92418	-0.29491	0.76856	0.949718	-5.68476
ENSG00000071564	TCF3	0.248511	1.41528	1.36264	0.175486	0.666297	-4.81936
ENSG00000071575	TRIB2	0.472428	-0.153464	1.8969	0.0601861	0.507583	-3.98333
ENSG00000071626	DAZAP1	-0.298035	2.2407	-1.58712	0.115054	0.592605	-4.57572
ENSG00000071655	MBD3	-0.402509	1.14908	-1.90924	0.0585615	0.506128	-4.04237
ENSG00000071859	FAM50A	0.253842	3.02343	1.34048	0.182562	0.672144	-4.91273
ENSG00000071889	FAM3A	-0.300269	0.861932	-1.64785	0.101937	0.583525	-4.41853
ENSG00000071894	CPSF1	-0.265482	1.53906	-1.45591	0.147965	0.636891	-4.71753
ENSG00000071994	PDCD2	-0.161189	0.687372	-0.87459	0.383502	0.805976	-5.23279
ENSG00000072042	RDH11	-0.376317	0.663346	-2.09548	0.0381793	0.450859	-3.70692
ENSG00000072062	PRKACA	-0.327869	2.77078	-2.24526	0.0265377	0.426162	-3.49255
ENSG00000072071	ADGRL1	-0.182013	0.435925	-0.933018	0.352639	0.787873	-5.15883
ENSG00000072080	SPP2	0.0603151	0.228583	0.127854	0.898474	0.980128	-5.48679
ENSG00000072110	ACTN1	-0.264895	5.06021	-2.14297	0.0340859	0.445264	-3.69066
ENSG00000072121	ZFYVE26	0.297016	1.74782	1.89272	0.0607464	0.507955	-4.09264
ENSG00000072134	EPN2	0.0125996	1.23075	0.0487016	0.961236	0.994055	-5.61611
ENSG00000072135	PTPN18	-0.402166	2.38571	-2.40846	0.0175039	0.366614	-3.16197
ENSG00000072210	ALDH3A2	-0.404897	1.77625	-1.79616	0.0749247	0.531765	-4.2524
ENSG00000072274	TFRC	-0.105279	4.42316	-0.48502	0.628525	0.907912	-5.61732
ENSG00000072310	SREBF1	-0.200144	2.91629	-1.42432	0.156888	0.64621	-4.80895
ENSG00000072364	AFF4	0.240572	3.0928	1.69709	0.0922086	0.571324	-4.43579
ENSG00000072401	UBE2D1	0.243195	2.78028	1.29607	0.197379	0.685594	-4.9596
ENSG00000072415	MPP5	0.225093	0.350055	1.34162	0.182193	0.672144	-4.75557
ENSG00000072501	SMC1A	-0.308516	1.26998	-1.66705	0.0980486	0.581179	-4.41876
ENSG00000072506	HSD17B10	-0.287156	0.703934	-1.10769	0.270156	0.741196	-5.0381
ENSG00000072518	MARK2	0.153615	3.11231	1.18051	0.240074	0.71757	-5.0933
ENSG00000072609	CHFR	-0.128657	3.07684	-0.864791	0.388837	0.809413	-5.38056
ENSG00000072682	P4HA2	0.0162083	1.80933	0.0605988	0.951777	0.992609	-5.66399
ENSG00000072694	FCGR2B	-0.125112	1.7373	-0.574678	0.566559	0.88469	-5.51303
ENSG00000072736	NFATC3	0.0926404	0.749724	0.61709	0.538316	0.875952	-5.39984
ENSG00000072756	TRNT1	0.026504	0.792743	0.133328	0.894152	0.979394	-5.56178
ENSG00000072778	ACADVL	-0.370926	4.3957	-2.10954	0.0369256	0.447163	-3.75403
ENSG00000072786	STK10	0.10468	5.01638	0.608656	0.543875	0.877628	-5.55388
ENSG00000072803	FBXW11	0.104002	1.89352	0.632835	0.528017	0.872904	-5.49156
ENSG00000072818	ACAP1	-0.0764416	3.16867	-0.359584	0.719775	0.935207	-5.65947
ENSG00000072849	DERL2	0.0223733	1.65172	0.136079	0.891981	0.979219	-5.64599
ENSG00000072858	SIDT1	-0.0245156	0.303191	-0.0835816	0.933525	0.987813	-5.50505
ENSG00000072864	NDE1	-0.180278	2.63659	-1.23433	0.219433	0.701283	-5.02663
ENSG00000072952	MRVI1	0.102868	0.758202	0.442878	0.658632	0.916152	-5.47663
ENSG00000072958	AP1M1	-0.163847	2.40742	-0.958694	0.339594	0.782529	-5.28712
ENSG00000073008	PVR	-0.385853	0.690412	-1.64972	0.101552	0.583525	-4.40498
ENSG00000073050	XRCC1	-0.553328	0.588053	-3.00324	0.00323687	0.280428	-1.83057
ENSG00000073060	SCARB1	-0.47242	0.806707	-2.51403	0.0132278	0.339986	-2.9162
ENSG00000073169	SELENOO	-0.0885433	0.306506	-0.430212	0.667794	0.92018	-5.43197
ENSG00000073331	ALPK1	0.139725	3.4518	0.593606	0.553866	0.880332	-5.5634
ENSG00000073350	LLGL2	-0.439391	1.53195	-1.54848	0.124077	0.604669	-4.59871
ENSG00000073417	PDE8A	-0.154472	1.7147	-0.749619	0.454916	0.846219	-5.4116
ENSG00000073578	SDHA	-0.330339	2.22122	-2.221	0.0281822	0.433477	-3.52997
ENSG00000073584	SMARCE1	-0.124509	1.73146	-0.803525	0.423222	0.831079	-5.37582
ENSG00000073614	KDM5A	0.346332	2.76388	2.46758	0.0149788	0.35445	-3.04289
ENSG00000073737	DHRS9	-0.117954	1.3187	-0.399094	0.690516	0.926373	-5.55757
ENSG00000073756	PTGS2	0.388487	5.36974	0.967603	0.335142	0.782225	-5.29783
ENSG00000073792	IGF2BP2	-0.0970073	1.38263	-0.381266	0.703663	0.929906	-5.5678
ENSG00000073803	MAP3K13	0.322068	1.6158	1.91269	0.0581134	0.504905	-4.05418
ENSG00000073849	ST6GAL1	0.0573402	1.54746	0.286747	0.774789	0.950757	-5.60743
ENSG00000073910	FRY	-0.104289	1.02278	-0.623153	0.534338	0.874775	-5.42931
ENSG00000073921	PICALM	0.198654	5.54757	1.22205	0.224025	0.705807	-5.0478
ENSG00000073969	NSF	0.187101	1.57632	1.25401	0.212218	0.696219	-4.95494
ENSG00000074054	CLASP1	0.181198	1.7573	1.27308	0.20539	0.690625	-4.94505
ENSG00000074071	MRPS34	-0.222644	0.425758	-0.867761	0.387215	0.808227	-5.20921
ENSG00000074201	CLNS1A	0.118273	1.77314	0.676817	0.499793	0.863586	-5.4588
ENSG00000074319	TSG101	0.246141	2.39601	1.38208	0.169451	0.658798	-4.8468
ENSG00000074356	NCBP3	-0.239165	1.35362	-1.63976	0.103611	0.584492	-4.46244
ENSG00000074370	ATP2A3	0.0772084	2.87252	0.366806	0.714394	0.933187	-5.65253
ENSG00000074416	MGLL	0.0589822	2.8733	0.253223	0.800519	0.955369	-5.68424
ENSG00000074603	DPP8	0.0738689	1.15412	0.451344	0.652537	0.913526	-5.51821
ENSG00000074621	SLC24A1	0.263633	0.371046	1.24034	0.217211	0.700139	-4.86365
ENSG00000074657	ZNF532	0.192246	1.01178	0.677947	0.499079	0.863534	-5.38984
ENSG00000074660	SCARF1	-0.0297974	2.8688	-0.102441	0.918573	0.983858	-5.70861
ENSG00000074695	LMAN1	-0.469021	0.943407	-2.07919	0.0396781	0.455379	-3.74801
ENSG00000074696	HACD3	0.0734554	0.850019	0.304016	0.76163	0.948195	-5.53419
ENSG00000074706	IPCEF1	0.217015	1.05047	1.00614	0.316325	0.773834	-5.15461
ENSG00000074755	ZZEF1	-0.00348574	2.10749	-0.027936	0.977758	0.996457	-5.6828
ENSG00000074800	ENO1	-0.312021	5.4081	-2.1516	0.033384	0.443665	-3.6731
ENSG00000074842	MYDGF	-0.392057	2.37914	-1.64019	0.103521	0.584492	-4.50415
ENSG00000074935	TUBE1	0.109618	1.00427	0.386535	0.699769	0.928396	-5.52374
ENSG00000074964	ARHGEF10L	0.0201	1.86977	0.100058	0.920461	0.983931	-5.66311
ENSG00000075089	ACTR6	0.105932	0.914948	0.48248	0.630323	0.908048	-5.47996
ENSG00000075142	SRI	-0.104337	2.40802	-0.471739	0.637949	0.909614	-5.59811
ENSG00000075151	EIF4G3	0.423844	2.58159	2.50706	0.0134782	0.34114	-2.95718
ENSG00000075223	SEMA3C	-0.468168	1.91151	-2.10285	0.0375177	0.448754	-3.74092
ENSG00000075234	TTC38	-0.182442	1.04141	-0.822534	0.412365	0.824697	-5.30575
ENSG00000075239	ACAT1	-0.00696125	1.89387	-0.0368124	0.970694	0.995668	-5.66779
ENSG00000075240	GRAMD4	0.0679949	1.43042	0.297512	0.766578	0.949333	-5.59506
ENSG00000075275	CELSR1	-0.590377	0.397353	-2.07654	0.0399272	0.455536	-3.72913
ENSG00000075292	ZNF638	0.246996	3.68747	1.33463	0.184464	0.672391	-4.92556
ENSG00000075303	SLC25A40	-0.0655785	0.944858	-0.302285	0.762945	0.948492	-5.5493
ENSG00000075399	VPS9D1	-0.215868	3.59746	-0.881994	0.379501	0.804935	-5.37268
ENSG00000075407	ZNF37A	-0.259656	0.325977	-1.15862	0.248856	0.727142	-4.9502
ENSG00000075413	MARK3	0.30798	3.5426	2.41001	0.0174334	0.366614	-3.16832
ENSG00000075415	SLC25A3	-0.335783	3.64512	-2.18424	0.0308415	0.435248	-3.61491
ENSG00000075420	FNDC3B	0.436654	5.2704	2.4109	0.0173928	0.366614	-3.165
ENSG00000075426	FOSL2	0.237396	5.48432	1.2949	0.197781	0.685714	-4.96691
ENSG00000075539	FRYL	0.0495869	2.28686	0.3327	0.739927	0.940336	-5.6422
ENSG00000075568	TMEM131	-0.178179	1.3984	-1.02664	0.306604	0.765654	-5.17243
ENSG00000075624	ACTB	-0.174231	10.0286	-1.08192	0.281405	0.749763	-5.14736
ENSG00000075651	PLD1	0.38398	2.58676	1.72704	0.0866722	0.561866	-4.37952
ENSG00000075711	DLG1	-0.000602456	1.40388	-0.0038049	0.99697	0.998695	-5.63464
ENSG00000075785	RAB7A	0.0694603	5.06346	0.560403	0.576224	0.889254	-5.57883
ENSG00000075790	BCAP29	0.0577839	0.726912	0.275468	0.783419	0.951432	-5.52936
ENSG00000075856	SART3	-0.0657845	1.63791	-0.412771	0.680493	0.924093	-5.57847
ENSG00000075884	ARHGAP15	0.464655	3.53281	1.65062	0.101368	0.583525	-4.50788
ENSG00000075914	EXOSC7	-0.142648	0.223108	-0.660148	0.510393	0.86816	-5.31879
ENSG00000076043	REXO2	0.188077	0.424393	0.770888	0.442252	0.84156	-5.27042
ENSG00000076053	RBM7	0.382382	1.40812	2.01667	0.0459087	0.47139	-3.8702
ENSG00000076067	RBMS2	-0.0548049	0.766699	-0.213993	0.830907	0.963891	-5.54827
ENSG00000076108	BAZ2A	0.156561	3.67346	1.12838	0.261355	0.734659	-5.15263
ENSG00000076201	PTPN23	-0.328164	1.62642	-1.91349	0.0580101	0.504905	-4.05758
ENSG00000076242	MLH1	0.131846	1.42974	0.887322	0.376638	0.803063	-5.28819
ENSG00000076382	SPAG5	-0.286376	0.600554	-1.3099	0.192671	0.680038	-4.82176
ENSG00000076513	ANKRD13A	0.107215	2.96768	0.773622	0.440639	0.841443	-5.44625
ENSG00000076554	TPD52	-0.388177	0.782524	-1.30357	0.194816	0.682478	-4.84651
ENSG00000076555	ACACB	-0.028119	1.68459	-0.125143	0.900614	0.980467	-5.64987
ENSG00000076604	TRAF4	-0.248801	1.48754	-0.957103	0.340393	0.78278	-5.24067
ENSG00000076641	PAG1	0.013055	3.48681	0.050763	0.959597	0.994053	-5.72072
ENSG00000076662	ICAM3	-0.323887	3.38037	-1.22848	0.221615	0.704188	-5.04488
ENSG00000076685	NT5C2	0.142298	4.03149	0.881989	0.379503	0.804935	-5.375
ENSG00000076924	XAB2	-0.201002	0.796889	-1.25796	0.21079	0.696219	-4.89419
ENSG00000076928	ARHGEF1	-0.141926	4.24823	-0.757979	0.449914	0.843301	-5.4656
ENSG00000076944	STXBP2	-0.0818989	6.2385	-0.480173	0.631957	0.908319	-5.60452
ENSG00000076984	MAP2K7	-0.321004	1.07906	-2.03044	0.0444691	0.467805	-3.83668
ENSG00000077044	DGKD	0.0672176	2.8906	0.302069	0.76311	0.948492	-5.6718
ENSG00000077097	TOP2B	0.193799	1.26389	1.23566	0.218941	0.700439	-4.95231
ENSG00000077147	TM9SF3	0.0585856	2.27094	0.340551	0.734023	0.939081	-5.63961
ENSG00000077150	NFKB2	0.419862	4.93482	2.01759	0.0458105	0.471357	-3.91818
ENSG00000077157	PPP1R12B	-0.511832	1.12225	-2.33715	0.0210481	0.388011	-3.27795
ENSG00000077232	DNAJC10	0.112891	1.01721	0.487204	0.626981	0.907875	-5.4906
ENSG00000077235	GTF3C1	0.121209	1.15629	0.692322	0.49004	0.858845	-5.39791
ENSG00000077238	IL4R	0.127115	5.63965	0.635365	0.526371	0.872763	-5.53355
ENSG00000077254	USP33	0.0730611	2.571	0.431835	0.666618	0.919753	-5.61985
ENSG00000077312	SNRPA	-0.152029	1.29976	-0.883582	0.378646	0.804678	-5.28422
ENSG00000077327	SPAG6	-0.377396	0.228457	-1.16569	0.245998	0.724813	-4.93857
ENSG00000077380	DYNC1I2	0.0567099	2.25053	0.309263	0.757645	0.947098	-5.64736
ENSG00000077420	APBB1IP	-0.0114059	3.51695	-0.0556793	0.955688	0.993026	-5.72134
ENSG00000077454	LRCH4	-0.201207	3.49595	-1.15507	0.250302	0.727399	-5.12408
ENSG00000077458	FAM76B	-0.00286729	1.34679	-0.012842	0.989775	0.997963	-5.62985
ENSG00000077463	SIRT6	0.17406	1.43263	1.10974	0.269275	0.740287	-5.09294
ENSG00000077514	POLD3	0.0953613	1.09148	0.564814	0.573229	0.887715	-5.46217
ENSG00000077549	CAPZB	0.0263799	4.43267	0.1985	0.842982	0.967508	-5.70618
ENSG00000077585	GPR137B	-0.00150955	2.78636	-0.00753255	0.994002	0.998139	-5.70883
ENSG00000077684	JADE1	-0.0194193	0.328462	-0.100627	0.92001	0.983858	-5.50669
ENSG00000077721	UBE2A	-0.103306	2.56884	-0.563532	0.574099	0.888094	-5.56099
ENSG00000077782	FGFR1	-0.156881	1.1225	-0.567742	0.571246	0.886962	-5.46988
ENSG00000077984	CST7	0.115422	3.77873	0.343025	0.732166	0.938317	-5.67142
ENSG00000078043	PIAS2	-0.086449	0.71448	-0.366211	0.714837	0.933393	-5.50356
ENSG00000078061	ARAF	-0.302093	1.91617	-1.90233	0.0594669	0.506762	-4.08586
ENSG00000078070	MCCC1	0.349714	0.228587	1.43182	0.154732	0.645969	-4.63717
ENSG00000078081	LAMP3	0.819298	0.534472	2.78941	0.0061218	0.310634	-2.33193
ENSG00000078098	FAP	0.492703	-0.750202	1.35137	0.179057	0.66904	-4.63788
ENSG00000078114	NEBL	-0.641085	0.557038	-2.14879	0.033611	0.444097	-3.60953
ENSG00000078124	ACER3	-0.387297	1.80089	-1.98642	0.0492105	0.47774	-3.94186
ENSG00000078140	UBE2K	-0.174202	2.05122	-0.820009	0.413798	0.825416	-5.38064
ENSG00000078142	PIK3C3	0.121914	1.74378	0.818355	0.414737	0.82662	-5.36289
ENSG00000078269	SYNJ2	0.392541	0.840651	1.85987	0.065293	0.511446	-4.09563
ENSG00000078304	PPP2R5C	0.343535	4.08357	2.6791	0.00839242	0.316532	-2.58501
ENSG00000078369	GNB1	0.158404	4.98793	1.2961	0.197369	0.685594	-4.96895
ENSG00000078401	EDN1	0.735552	0.834646	2.19534	0.0300163	0.435248	-3.52839
ENSG00000078403	MLLT10	0.0480407	1.60355	0.248688	0.804017	0.955944	-5.62124
ENSG00000078487	ZCWPW1	0.306282	1.51174	1.40856	0.161488	0.651511	-4.76933
ENSG00000078618	NRDC	0.345373	4.01569	2.3465	0.0205496	0.3843	-3.29879
ENSG00000078668	VDAC3	-0.316168	1.39963	-1.66351	0.098757	0.582832	-4.43142
ENSG00000078674	PCM1	0.135035	3.03726	0.841844	0.401509	0.818609	-5.39823
ENSG00000078687	TNRC6C	-0.231361	0.232561	-1.30128	0.195597	0.683347	-4.79416
ENSG00000078699	CBFA2T2	-0.0433332	0.380589	-0.281315	0.778942	0.950951	-5.48427
ENSG00000078747	ITCH	-0.0777431	2.60518	-0.516846	0.606192	0.901691	-5.58545
ENSG00000078804	TP53INP2	0.0586712	2.23635	0.27115	0.78673	0.95296	-5.65619
ENSG00000078808	SDF4	-0.111251	3.3265	-0.719397	0.473261	0.851837	-5.4872
ENSG00000078814	MYH7B	-0.252495	0.10041	-1.28225	0.202168	0.68984	-4.8016
ENSG00000078902	TOLLIP	0.141357	2.76744	0.923055	0.357786	0.791115	-5.32777
ENSG00000078967	UBE2D4	-0.522247	1.41569	-1.45158	0.149166	0.64064	-4.71853
ENSG00000079134	THOC1	-0.420989	0.635112	-2.09451	0.0382672	0.450859	-3.70796
ENSG00000079215	SLC1A3	0.28895	2.25452	1.14497	0.254443	0.731142	-5.10315
ENSG00000079246	XRCC5	-0.0172299	3.13009	-0.123344	0.902036	0.980467	-5.71126
ENSG00000079263	SP140	1.18421	2.33858	4.70055	6.83621e-06	0.0336478	3.30122
ENSG00000079277	MKNK1	0.12862	4.70897	0.679071	0.498369	0.863534	-5.51509
ENSG00000079308	TNS1	0.21105	2.41505	0.900021	0.369868	0.800303	-5.33366
ENSG00000079313	REXO1	-0.132514	2.01881	-0.49303	0.62287	0.905194	-5.57161
ENSG00000079332	SAR1A	0.20657	2.39455	1.43578	0.153604	0.645912	-4.78016
ENSG00000079335	CDC14A	0.0883438	0.571064	0.540609	0.589755	0.896547	-5.41482
ENSG00000079385	CEACAM1	0.201554	2.84939	0.803099	0.423467	0.831209	-5.4205
ENSG00000079387	SENP1	0.154799	0.763855	0.88636	0.377154	0.803615	-5.22432
ENSG00000079432	CIC	-0.00793219	2.68091	-0.0504255	0.959865	0.994053	-5.70605
ENSG00000079459	FDFT1	-0.272431	2.1553	-1.39149	0.16659	0.65652	-4.82888
ENSG00000079739	PGM1	-0.115233	0.707711	-0.605937	0.545673	0.877714	-5.4052
ENSG00000079785	DDX1	0.339182	0.522389	1.51998	0.131084	0.610403	-4.5562
ENSG00000079805	DNM2	-0.139004	4.92243	-1.02961	0.305214	0.764659	-5.24508
ENSG00000079819	EPB41L2	-0.131561	0.762654	-0.529014	0.59775	0.898927	-5.4489
ENSG00000079950	STX7	0.119483	2.53148	0.702484	0.483705	0.855736	-5.48045
ENSG00000079974	RABL2B	-0.319853	1.47946	-1.27385	0.20512	0.690401	-4.93061
ENSG00000079999	KEAP1	0.0872731	1.48655	0.485876	0.627919	0.907912	-5.53651
ENSG00000080189	SLC35C2	-0.104651	1.34788	-0.670793	0.503611	0.864173	-5.43235
ENSG00000080298	RFX3	-0.225641	0.996605	-1.12993	0.260706	0.733916	-5.04467
ENSG00000080345	RIF1	0.094587	0.794587	0.674446	0.501294	0.864078	-5.37123
ENSG00000080371	RAB21	0.218137	3.22523	1.19318	0.235097	0.714335	-5.08147
ENSG00000080503	SMARCA2	-0.380834	3.7916	-1.44222	0.151783	0.642542	-4.79284
ENSG00000080603	SRCAP	-0.160048	1.98042	-1.14228	0.255557	0.732062	-5.09824
ENSG00000080608	PUM3	-0.166227	0.299929	-0.764385	0.446102	0.842018	-5.26803
ENSG00000080802	CNOT4	-0.0853849	0.926168	-0.587688	0.55782	0.881496	-5.43803
ENSG00000080815	PSEN1	0.114016	4.07741	0.719625	0.473121	0.851837	-5.49145
ENSG00000080822	CLDND1	0.0551093	2.00392	0.282912	0.77772	0.950951	-5.64058
ENSG00000080823	MOK	-0.062427	1.85282	-0.220155	0.826115	0.962415	-5.64659
ENSG00000080824	HSP90AA1	0.171181	5.63262	0.828277	0.409118	0.822417	-5.40712
ENSG00000080845	DLGAP4	0.113152	2.51973	0.703029	0.483367	0.855736	-5.48002
ENSG00000081019	RSBN1	-0.174782	0.667244	-0.848415	0.397855	0.81703	-5.25007
ENSG00000081041	CXCL2	0.118278	5.32463	0.390884	0.696559	0.927458	-5.64925
ENSG00000081059	TCF7	-0.00568604	0.351154	-0.0272434	0.97831	0.996457	-5.51345
ENSG00000081087	OSTM1	0.0602659	2.73388	0.370289	0.711804	0.932402	-5.64721
ENSG00000081154	PCNP	0.0752565	2.12561	0.407496	0.684352	0.924093	-5.60932
ENSG00000081189	MEF2C	-0.237113	2.03367	-0.71519	0.475848	0.853077	-5.45303
ENSG00000081237	PTPRC	0.164403	6.25134	0.816699	0.41568	0.827053	-5.40942
ENSG00000081307	UBA5	-0.117567	0.502321	-0.504377	0.614899	0.903269	-5.43026
ENSG00000081320	STK17B	0.289318	3.8118	1.36648	0.174283	0.663788	-4.88861
ENSG00000081665	ZNF506	-0.32804	1.32903	-1.83928	0.0682863	0.514668	-4.16365
ENSG00000081760	AACS	-0.0565274	1.80178	-0.20763	0.835862	0.964276	-5.6465
ENSG00000081791	DELE1	0.0131236	1.50724	0.0793065	0.936918	0.988719	-5.63929
ENSG00000081870	HSPB11	0.166738	0.249562	0.694139	0.488904	0.858436	-5.29686
ENSG00000081913	PHLPP1	0.116528	1.23132	0.653555	0.514619	0.869664	-5.42855
ENSG00000081923	ATP8B1	0.081207	0.133769	0.326087	0.744913	0.942572	-5.43492
ENSG00000082014	SMARCD3	0.0216242	0.966785	0.089383	0.928923	0.986696	-5.5833
ENSG00000082068	WDR70	-0.0563169	0.393757	-0.292285	0.770561	0.950088	-5.48519
ENSG00000082074	FYB1	0.26908	4.48802	1.24567	0.215252	0.698153	-5.02845
ENSG00000082153	BZW1	0.090865	3.93352	0.577795	0.564459	0.884204	-5.57403
ENSG00000082212	ME2	-0.113748	1.9615	-0.772846	0.441096	0.84156	-5.41113
ENSG00000082213	C5orf22	0.0864197	0.347583	0.418816	0.676081	0.923268	-5.43868
ENSG00000082258	CCNT2	0.325317	1.50264	1.85716	0.0656815	0.511446	-4.13851
ENSG00000082397	EPB41L3	0.0131842	3.04538	0.0692693	0.944888	0.991193	-5.71407
ENSG00000082515	MRPL22	-0.559627	-0.0628265	-2.72166	0.00743875	0.316532	-2.49006
ENSG00000082641	NFE2L1	-0.429227	2.75464	-2.01069	0.0465454	0.474148	-3.92193
ENSG00000082701	GSK3B	-0.244537	1.77887	-1.63178	0.105284	0.587625	-4.49518
ENSG00000082781	ITGB5	-0.832063	1.23373	-3.17016	0.00192325	0.249468	-1.39777
ENSG00000082805	ERC1	-0.290503	1.99937	-1.72707	0.0866666	0.561866	-4.36524
ENSG00000082898	XPO1	0.150212	3.01888	0.977677	0.330154	0.780568	-5.28682
ENSG00000082996	RNF13	0.308408	4.64024	1.66889	0.0976826	0.580346	-4.48179
ENSG00000083099	LYRM2	0.224379	0.544837	1.1505	0.252169	0.728562	-4.97311
ENSG00000083168	KAT6A	0.166393	2.8362	1.08806	0.278698	0.747339	-5.18146
ENSG00000083223	TUT7	0.262112	3.36199	1.27073	0.206224	0.691205	-4.99727
ENSG00000083290	ULK2	-0.548118	0.820255	-2.39728	0.0180222	0.367641	-3.15205
ENSG00000083312	TNPO1	-0.117402	2.66841	-0.856661	0.393298	0.813154	-5.37783
ENSG00000083444	PLOD1	-0.402216	1.8141	-2.15624	0.0330119	0.442737	-3.64108
ENSG00000083457	ITGAE	-0.15992	1.35706	-0.857107	0.393053	0.813061	-5.30972
ENSG00000083520	DIS3	-0.0856206	0.417384	-0.529352	0.597515	0.898927	-5.40743
ENSG00000083535	PIBF1	0.0517276	-0.0639106	0.265216	0.791287	0.953351	-5.43056
ENSG00000083642	PDS5B	-0.0771004	0.984174	-0.566153	0.572322	0.887715	-5.45471
ENSG00000083799	CYLD	0.343562	2.8265	2.09787	0.037964	0.450859	-3.76872
ENSG00000083828	ZNF586	-0.0222596	1.21221	-0.137535	0.890833	0.978942	-5.60715
ENSG00000083844	ZNF264	-0.0655883	1.03772	-0.351145	0.726081	0.938018	-5.54393
ENSG00000083845	RPS5	-0.39208	4.07225	-1.62171	0.107427	0.587625	-4.55082
ENSG00000083857	FAT1	0.0538732	0.292705	0.193936	0.846546	0.968474	-5.4891
ENSG00000083896	YTHDC1	0.151331	2.88668	0.843203	0.400752	0.817957	-5.39363
ENSG00000083937	CHMP2B	0.652022	1.95107	3.52421	0.000597266	0.217153	-0.433329
ENSG00000084070	SMAP2	0.301471	4.03252	1.36553	0.174578	0.663788	-4.8897
ENSG00000084072	PPIE	-0.0460947	0.546974	-0.206506	0.836737	0.964614	-5.51992
ENSG00000084073	ZMPSTE24	-0.177827	1.22263	-1.05153	0.295079	0.756636	-5.136
ENSG00000084090	STARD7	0.108967	1.7626	0.582483	0.561308	0.883023	-5.51018
ENSG00000084093	REST	-0.123627	1.0809	-0.769598	0.443014	0.84156	-5.34615
ENSG00000084110	HAL	0.243758	1.75502	0.725175	0.469722	0.850924	-5.42291
ENSG00000084112	SSH1	-0.382075	2.33567	-1.84827	0.0669663	0.512327	-4.18826
ENSG00000084207	GSTP1	-0.732833	4.2044	-2.04293	0.0431965	0.4617	-3.87353
ENSG00000084234	APLP2	-0.190458	5.61089	-1.57831	0.117063	0.595539	-4.60529
ENSG00000084463	WBP11	0.0671882	1.11896	0.39063	0.696746	0.927458	-5.54072
ENSG00000084623	EIF3I	-0.242972	2.47863	-1.38842	0.167521	0.656648	-4.84144
ENSG00000084652	TXLNA	-0.333492	0.725837	-1.6055	0.110949	0.587625	-4.46804
ENSG00000084676	NCOA1	-0.0106134	2.55634	-0.0565482	0.954997	0.992938	-5.70194
ENSG00000084733	RAB10	-0.0535069	4.10342	-0.345951	0.729971	0.938055	-5.67036
ENSG00000084754	HADHA	-0.355585	2.49088	-2.71025	0.00768426	0.316532	-2.50878
ENSG00000084764	MAPRE3	-0.12479	0.646122	-0.547306	0.58516	0.893215	-5.42464
ENSG00000084774	CAD	0.171769	0.464054	0.652208	0.515484	0.870071	-5.34435
ENSG00000085063	CD59	-0.0949212	3.69974	-0.43994	0.660753	0.917503	-5.63647
ENSG00000085117	CD82	0.254968	5.27766	1.2994	0.196238	0.684296	-4.96329
ENSG00000085224	ATRX	0.222518	2.43296	1.32399	0.187963	0.675474	-4.91731
ENSG00000085231	AK6	0.556142	0.927499	2.47374	0.0147353	0.351291	-2.99733
ENSG00000085265	FCN1	-0.17478	1.77133	-0.757824	0.450006	0.843301	-5.40857
ENSG00000085276	MECOM	-0.0483662	0.309616	-0.15211	0.87935	0.975982	-5.49741
ENSG00000085365	SCAMP1	0.177439	0.492965	0.961807	0.338034	0.782475	-5.13973
ENSG00000085415	SEH1L	-0.145888	0.686647	-0.791317	0.430282	0.837302	-5.29167
ENSG00000085433	WDR47	-0.00124927	0.591742	-0.0064086	0.994897	0.998139	-5.54651
ENSG00000085449	WDFY1	0.244449	2.59689	1.41948	0.15829	0.646459	-4.80618
ENSG00000085491	SLC25A24	-0.0805548	1.17758	-0.393946	0.694303	0.927119	-5.54446
ENSG00000085511	MAP3K4	-0.0967288	0.551453	-0.461019	0.645599	0.91276	-5.45126
ENSG00000085514	PILRA	0.23407	4.48519	1.21099	0.228222	0.709456	-5.06638
ENSG00000085662	AKR1B1	-0.525546	2.03767	-1.87445	0.0632417	0.507955	-4.13663
ENSG00000085719	CPNE3	-0.0799746	1.63667	-0.395928	0.692844	0.926795	-5.58517
ENSG00000085721	RRN3	-0.144597	0.502106	-0.78477	0.434098	0.840023	-5.27602
ENSG00000085733	CTTN	-0.363747	1.17617	-1.18039	0.240125	0.71757	-5.01084
ENSG00000085788	DDHD2	-0.0559666	0.596532	-0.248531	0.804138	0.955944	-5.51894
ENSG00000085831	TTC39A	-0.317164	0.0511987	-1.2522	0.212873	0.696268	-4.82853
ENSG00000085832	EPS15	0.199683	2.09131	1.45025	0.149535	0.64064	-4.74999
ENSG00000085871	MGST2	-0.0137113	0.475614	-0.0626538	0.950144	0.992235	-5.52888
ENSG00000085872	CHERP	-0.0499973	1.22365	-0.369932	0.71207	0.93241	-5.55848
ENSG00000085978	ATG16L1	-0.328909	1.04951	-1.88505	0.0617826	0.507955	-4.07604
ENSG00000085982	USP40	-0.310702	0.553615	-1.08762	0.27889	0.747359	-5.04177
ENSG00000085998	POMGNT1	-0.691706	0.446258	-3.17599	0.00188791	0.249468	-1.41721
ENSG00000086015	MAST2	-0.568786	0.878843	-3.17034	0.00192213	0.249468	-1.40879
ENSG00000086061	DNAJA1	0.264629	3.95436	1.64876	0.101749	0.583525	-4.51217
ENSG00000086062	B4GALT1	-0.0173734	3.24972	-0.10086	0.919826	0.983858	-5.71493
ENSG00000086065	CHMP5	0.308413	2.0612	1.72086	0.0877912	0.56411	-4.37366
ENSG00000086102	NFX1	0.0827712	1.32047	0.490096	0.62494	0.906558	-5.51911
ENSG00000086200	IPO11	0.401755	1.49081	1.85317	0.0662552	0.512187	-4.14194
ENSG00000086232	EIF2AK1	-0.326879	1.30528	-1.80283	0.0738643	0.529998	-4.21883
ENSG00000086300	SNX10	0.30082	4.24656	1.4769	0.14226	0.630227	-4.74942
ENSG00000086504	MRPL28	-0.169835	1.29051	-1.07525	0.284367	0.751496	-5.11986
ENSG00000086544	ITPKC	0.418215	1.24872	1.87606	0.0630179	0.507955	-4.09478
ENSG00000086548	CEACAM6	-0.0521654	1.58798	-0.161057	0.872313	0.97474	-5.63903
ENSG00000086589	RBM22	0.251473	1.90642	1.60901	0.110178	0.587625	-4.52975
ENSG00000086598	TMED2	-0.253571	2.9195	-1.21711	0.225895	0.707511	-5.05067
ENSG00000086619	ERO1B	0.239683	0.0862012	1.25257	0.212738	0.696268	-4.82175
ENSG00000086666	ZFAND6	0.277423	3.23612	1.82351	0.0706545	0.521075	-4.24221
ENSG00000086730	LAT2	-0.10028	3.68646	-0.54367	0.587653	0.894626	-5.59081
ENSG00000086758	HUWE1	-0.0113529	2.62648	-0.0860723	0.931549	0.987114	-5.70188
ENSG00000086848	ALG9	-0.0997018	1.24509	-0.413527	0.679941	0.924093	-5.54598
ENSG00000087008	ACOX3	0.132772	0.552717	0.7312	0.466048	0.850308	-5.3088
ENSG00000087074	PPP1R15A	0.475442	6.37723	2.35901	0.0198998	0.380552	-3.26657
ENSG00000087077	TRIP6	-0.425289	0.822168	-2.14108	0.0342406	0.445264	-3.63322
ENSG00000087086	FTL	-0.337182	10.2072	-1.7812	0.0773487	0.536454	-4.27326
ENSG00000087087	SRRT	-0.114092	2.80216	-0.755786	0.451223	0.844487	-5.45405
ENSG00000087088	BAX	-0.163146	2.86156	-0.824813	0.411075	0.823791	-5.4075
ENSG00000087111	PIGS	-0.219726	1.10242	-1.25237	0.212811	0.696268	-4.92634
ENSG00000087152	ATXN7L3	0.0643403	2.77163	0.428849	0.668783	0.920816	-5.62676
ENSG00000087157	PGS1	-0.11112	4.44128	-0.505313	0.614244	0.903269	-5.60869
ENSG00000087191	PSMC5	0.0507851	2.11287	0.279627	0.780234	0.950951	-5.64705
ENSG00000087206	UIMC1	0.0751007	2.20863	0.448156	0.654829	0.914335	-5.59783
ENSG00000087237	CETP	0.206021	-0.456134	0.833315	0.406283	0.820905	-5.11469
ENSG00000087253	LPCAT2	0.102641	2.43845	0.483946	0.629285	0.907912	-5.5932
ENSG00000087263	OGFOD1	0.0202758	0.323414	0.0884483	0.929664	0.986844	-5.51103
ENSG00000087266	SH3BP2	-0.0731011	5.08626	-0.386298	0.699943	0.928396	-5.65259
ENSG00000087274	ADD1	0.0956008	3.53004	0.702794	0.483513	0.855736	-5.5007
ENSG00000087302	RTRAF	0.0469536	2.08175	0.297389	0.766671	0.949333	-5.64262
ENSG00000087338	GMCL1	0.0256818	1.05402	0.142029	0.887289	0.978603	-5.58955
ENSG00000087365	SF3B2	-0.0745628	3.25543	-0.677476	0.499377	0.863534	-5.51286
ENSG00000087460	GNAS	-0.349606	5.29761	-2.44234	0.0160143	0.361964	-3.09915
ENSG00000087470	DNM1L	-0.0585074	1.71059	-0.356595	0.722006	0.935927	-5.60129
ENSG00000087502	ERGIC2	-0.206154	1.71529	-0.930495	0.353938	0.788452	-5.27768
ENSG00000087589	CASS4	-0.437245	0.825778	-1.79172	0.075637	0.533742	-4.20864
ENSG00000087884	AAMDC	-0.261333	0.87392	-0.956653	0.34062	0.78278	-5.18957
ENSG00000087903	RFX2	-0.152978	3.23834	-0.844195	0.4002	0.817507	-5.39942
ENSG00000088038	CNOT3	-0.134335	2.07309	-0.836593	0.404444	0.820905	-5.36985
ENSG00000088205	DDX18	0.132014	1.61239	0.760055	0.448676	0.843301	-5.39437
ENSG00000088247	KHSRP	-0.488358	2.99846	-2.5668	0.0114631	0.324974	-2.83222
ENSG00000088256	GNA11	-0.483926	1.10928	-1.80592	0.0733771	0.529563	-4.20493
ENSG00000088280	ASAP3	0.251889	0.978742	0.817547	0.415197	0.827033	-5.29533
ENSG00000088298	EDEM2	-0.0034485	1.47437	-0.015445	0.987702	0.997726	-5.63884
ENSG00000088367	EPB41L1	-0.657406	0.792075	-2.12249	0.0358019	0.447163	-3.66634
ENSG00000088387	DOCK9	-0.139252	0.430416	-0.533858	0.594404	0.898622	-5.40707
ENSG00000088448	ANKRD10	-0.180119	4.53776	-0.768569	0.443623	0.84156	-5.4571
ENSG00000088682	COQ9	-0.182554	0.305345	-0.806146	0.421715	0.82992	-5.23766
ENSG00000088727	KIF9	0.00492599	0.141856	0.0183782	0.985367	0.997666	-5.48499
ENSG00000088766	CRLS1	0.117109	0.522979	0.557218	0.578391	0.890028	-5.40074
ENSG00000088808	PPP1R13B	-0.411853	0.761369	-1.70692	0.0903601	0.569101	-4.33013
ENSG00000088826	SMOX	0.101865	0.660653	0.401749	0.688566	0.924853	-5.48129
ENSG00000088827	SIGLEC1	0.069421	0.657406	0.172926	0.862994	0.9729	-5.54471
ENSG00000088832	FKBP1A	-0.154222	4.72969	-1.03235	0.303936	0.763243	-5.24353
ENSG00000088833	NSFL1C	0.168767	2.75933	1.04171	0.299589	0.759393	-5.22304
ENSG00000088836	SLC4A11	-0.40332	0.481425	-1.11293	0.26791	0.739363	-5.01182
ENSG00000088930	XRN2	0.00764285	1.71942	0.0385643	0.9693	0.995668	-5.65643
ENSG00000088986	DYNLL1	-0.224448	3.67963	-0.883383	0.378753	0.804678	-5.37179
ENSG00000088992	TESC	0.0886669	0.0541765	0.305934	0.760172	0.947952	-5.43265
ENSG00000089006	SNX5	0.0836201	2.26679	0.547202	0.585232	0.893215	-5.55655
ENSG00000089009	RPL6	-0.370498	4.52893	-1.9074	0.0588011	0.506762	-4.10758
ENSG00000089022	MAPKAPK5	-0.0570782	0.702104	-0.358687	0.720444	0.935207	-5.5065
ENSG00000089041	P2RX7	0.137415	1.67033	0.557953	0.577891	0.890028	-5.51453
ENSG00000089053	ANAPC5	0.0230582	2.15861	0.151995	0.87944	0.975982	-5.67532
ENSG00000089057	SLC23A2	0.019788	0.448545	0.095371	0.924175	0.985013	-5.52174
ENSG00000089060	SLC8B1	-0.160033	2.30477	-1.01122	0.313896	0.770789	-5.23665
ENSG00000089063	TMEM230	-0.199796	1.74158	-1.21155	0.22801	0.709456	-5.01436
ENSG00000089094	KDM2B	-0.352191	1.07818	-1.89928	0.0598705	0.506762	-4.05511
ENSG00000089101	CFAP61	-0.461979	0.15941	-1.34756	0.180277	0.669591	-4.7396
ENSG00000089127	OAS1	0.446142	2.25312	1.30112	0.195648	0.683347	-4.92962
ENSG00000089154	GCN1	-0.479293	1.75315	-2.07678	0.0399042	0.455536	-3.78301
ENSG00000089157	RPLP0	-0.396641	4.6886	-1.73314	0.0855782	0.559384	-4.38493
ENSG00000089159	PXN	-0.163162	4.32071	-0.771367	0.441969	0.84156	-5.45625
ENSG00000089220	PEBP1	-0.547437	2.14787	-2.4697	0.0148945	0.353305	-3.03137
ENSG00000089248	ERP29	-0.210183	1.64162	-1.18311	0.239048	0.716433	-5.03757
ENSG00000089280	FUS	0.0308892	4.2828	0.284079	0.776828	0.950757	-5.68774
ENSG00000089289	IGBP1	0.103745	0.573508	0.62181	0.535218	0.87516	-5.37644
ENSG00000089327	FXYD5	-0.286481	3.50422	-1.42039	0.158024	0.646459	-4.81976
ENSG00000089335	ZNF302	-0.344902	0.337365	-1.24474	0.215595	0.698153	-4.86747
ENSG00000089351	GRAMD1A	0.445068	5.65039	1.74635	0.0832477	0.556341	-4.36028
ENSG00000089356	FXYD3	-0.459294	1.51403	-1.21547	0.226514	0.708098	-4.99905
ENSG00000089486	CDIP1	0.0359288	0.747431	0.158706	0.874161	0.974855	-5.5534
ENSG00000089505	CMTM1	-0.137419	0.967099	-0.468717	0.640102	0.910018	-5.49434
ENSG00000089597	GANAB	-0.32978	2.65471	-2.00205	0.0474795	0.47546	-3.93609
ENSG00000089639	GMIP	0.019424	3.79531	0.0965594	0.923234	0.984542	-5.71988
ENSG00000089692	LAG3	0.30453	-0.604799	1.11376	0.267555	0.738727	-4.8827
ENSG00000089693	MLF2	-0.0688832	3.21303	-0.473311	0.63683	0.908584	-5.61912
ENSG00000089737	DDX24	-0.140989	2.18458	-0.721485	0.471981	0.851417	-5.45558
ENSG00000089775	ZBTB25	0.383336	0.225815	2.2604	0.0255553	0.417524	-3.39497
ENSG00000089818	NECAP1	0.0184552	2.56657	0.108165	0.914041	0.983858	-5.69873
ENSG00000089820	ARHGAP4	-0.103129	3.28188	-0.610296	0.542792	0.877628	-5.55312
ENSG00000089876	DHX32	-0.226877	0.252537	-0.903481	0.368037	0.799594	-5.16375
ENSG00000089902	RCOR1	-0.0751082	1.88222	-0.412582	0.680631	0.924093	-5.59507
ENSG00000089916	GPATCH2L	0.185989	2.26234	1.20989	0.228642	0.709456	-5.03894
ENSG00000090006	LTBP4	-0.33004	1.40935	-1.2192	0.225103	0.707277	-4.98726
ENSG00000090013	BLVRB	-0.337959	2.52846	-1.4586	0.147226	0.635654	-4.75652
ENSG00000090020	SLC9A1	-0.276113	1.50372	-1.97334	0.0507	0.483006	-3.95272
ENSG00000090054	SPTLC1	-0.0647936	2.51927	-0.353444	0.724361	0.937872	-5.64443
ENSG00000090060	PAPOLA	0.144463	3.97246	1.37516	0.171582	0.660366	-4.87823
ENSG00000090061	CCNK	0.257504	2.11209	1.80652	0.0732822	0.529563	-4.24477
ENSG00000090104	RGS1	0.791095	2.42544	2.75103	0.00683902	0.316532	-2.41343
ENSG00000090238	YPEL3	-0.133245	3.80566	-0.528597	0.598038	0.898927	-5.59863
ENSG00000090263	MRPS33	-0.263946	0.171141	-0.988123	0.325033	0.778805	-5.08838
ENSG00000090266	NDUFB2	-0.25504	2.94205	-1.27469	0.204824	0.690401	-4.98747
ENSG00000090273	NUDC	-0.0976331	2.10168	-0.459175	0.646919	0.912787	-5.58908
ENSG00000090316	MAEA	-0.00879622	3.92934	-0.0474753	0.962211	0.994372	-5.72372
ENSG00000090339	ICAM1	0.619134	4.78784	2.8777	0.00472473	0.285235	-2.11914
ENSG00000090372	STRN4	-0.115792	3.24336	-0.807933	0.420689	0.828916	-5.4264
ENSG00000090376	IRAK3	0.611876	4.3129	2.30564	0.0228056	0.399463	-3.38052
ENSG00000090382	LYZ	-0.710532	6.49792	-3.21596	0.00166145	0.243045	-1.26339
ENSG00000090432	MUL1	-0.0144199	0.0454069	-0.072466	0.942349	0.990445	-5.47163
ENSG00000090487	SPG21	-0.195478	3.15706	-1.55704	0.122031	0.601793	-4.63772
ENSG00000090520	DNAJB11	0.101614	1.94492	0.542919	0.588168	0.895027	-5.53968
ENSG00000090581	GNPTG	-0.100128	2.57349	-0.581477	0.561983	0.883023	-5.55265
ENSG00000090615	GOLGA3	-0.168045	1.86573	-0.880731	0.380181	0.804935	-5.32637
ENSG00000090621	PABPC4	-0.24562	3.16852	-1.34151	0.182226	0.672144	-4.91371
ENSG00000090661	CERS4	-0.0315857	1.44492	-0.142423	0.886979	0.978603	-5.62897
ENSG00000090674	MCOLN1	0.0284128	3.95674	0.172285	0.863497	0.973205	-5.71074
ENSG00000090686	USP48	-0.00609929	1.74296	-0.0372986	0.970307	0.995668	-5.66052
ENSG00000090857	PDPR	0.179002	0.818143	1.20699	0.229751	0.7101	-4.94312
ENSG00000090861	AARS1	-0.149394	1.27282	-0.780302	0.436712	0.840549	-5.35593
ENSG00000090863	GLG1	-0.138756	2.17074	-1.10785	0.270088	0.741196	-5.14069
ENSG00000090905	TNRC6A	-0.226391	1.2777	-1.17411	0.24262	0.720061	-5.02284
ENSG00000090924	PLEKHG2	-0.0189954	3.41941	-0.0683956	0.945582	0.991193	-5.71757
ENSG00000090989	EXOC1	0.161832	0.97788	0.834003	0.405896	0.820905	-5.28581
ENSG00000091039	OSBPL8	0.144925	3.58915	0.823186	0.411996	0.824697	-5.41851
ENSG00000091073	DTX2	0.104047	3.58077	0.656575	0.512681	0.869182	-5.52916
ENSG00000091106	NLRC4	-0.145439	1.26253	-0.63503	0.526589	0.872904	-5.44368
ENSG00000091136	LAMB1	0.0472559	1.00575	0.199282	0.842371	0.967243	-5.57491
ENSG00000091140	DLD	-0.098038	2.08239	-0.545755	0.586223	0.893503	-5.55056
ENSG00000091157	WDR7	-0.410925	0.938467	-2.27724	0.0244996	0.413666	-3.38721
ENSG00000091164	TXNL1	0.187103	1.46346	1.23619	0.218744	0.700439	-4.96745
ENSG00000091317	CMTM6	0.213036	4.0442	1.26392	0.208648	0.693897	-5.00882
ENSG00000091409	ITGA6	-0.140284	0.211835	-0.667883	0.50546	0.86604	-5.31048
ENSG00000091436	MAP3K20	0.0902908	1.62483	0.517709	0.605592	0.901506	-5.52994
ENSG00000091483	FH	-0.223534	0.131663	-1.07253	0.285581	0.752075	-5.01002
ENSG00000091490	SEL1L3	-0.0359487	1.80238	-0.220883	0.82555	0.962415	-5.64373
ENSG00000091527	CDV3	-0.130338	3.23846	-0.742976	0.458913	0.847727	-5.47049
ENSG00000091542	ALKBH5	-0.302694	1.57438	-1.47135	0.143752	0.630611	-4.70105
ENSG00000091592	NLRP1	-0.111033	1.80705	-0.56295	0.574494	0.888363	-5.52443
ENSG00000091640	SPAG7	0.145716	2.67602	0.947882	0.345048	0.782846	-5.30455
ENSG00000091651	ORC6	0.0349942	2.67075	0.14749	0.882987	0.977148	-5.69603
ENSG00000092010	PSME1	0.100874	3.62368	0.57147	0.568724	0.885422	-5.57562
ENSG00000092020	PPP2R3C	0.366684	2.03878	1.87244	0.0635202	0.507955	-4.13616
ENSG00000092036	HAUS4	0.0674313	1.80163	0.365722	0.715201	0.933419	-5.60355
ENSG00000092068	SLC7A8	-0.970246	1.16356	-3.55267	0.00054164	0.217153	-0.378659
ENSG00000092094	OSGEP	0.103385	0.994365	0.666694	0.506217	0.86604	-5.39748
[truncated: 8,711 more rows]
