# Supplementary material for: Host–microbiome archetypes differentiate infection from pathogen carriage in the human lower airway
Source: Nat Commun. 2026 Apr 13;17:5149. doi: 10.1038/s41467-026-71863-5 (PMC13250161; doi:10.1038/s41467-026-71863-5)
Supplement: Supplementary file 7 — Supplementary Data 5 [file 41467_2026_71863_MOESM7_ESM.xlsx]

## Sheet: A (LRTI v IPC)
ID	Description	setSize	enrichmentScore	NES	pvalue	p.adjust	qvalue	rank	leading_edge	core_enrichment
R-HSA-168256	Immune System	1389	0.444434	2.51692	5.62835e-62	7.3844e-59	5.18401e-59	1789	tags=35%, list=20%, signal=34%	8519/2209/6737/6890/1230/3665/115362/3659/3433/5698/91543/6672/10346/6402/9447/23586/3437/64135/103/10673/6772/6891/5371/10410/151636/85363/10475/10616/29126/5696/2634/57674/57823/2215/92610/127544/10561/9636/81030/634/7096/2633/6773/9246/26270/1439/10964/10538/3133/4940/3428/3430/4332/8737/5610/146722/353514/11314/2533/246778/51191/5608/115361/10379/24138/4939/3627/1234/3434/53917/27071/4615/513…
R-HSA-1280215	Cytokine Signaling in Immune system	550	0.479212	2.57406	9.08135e-33	5.95737e-30	4.1822e-30	1909	tags=40%, list=21%, signal=34%	8519/2209/6737/1230/3665/115362/3659/3433/91543/6672/10346/23586/3437/64135/103/10673/6772/5371/10410/85363/10475/5696/2634/92610/10561/9636/2633/6773/9246/1439/10964/10538/3133/4940/3430/5610/246778/51191/5608/115361/10379/24138/4939/3627/1234/3434/4615/84166/834/4938/729230/3717/8638/10581/4599/3561/2537/7318/54739/2635/3669/567/53840/836/3106/4600/3718/5292/684/5691/79792/3660/5724/1848/6813/3…
R-HSA-168249	Innate Immune System	765	0.415375	2.282	1.92563e-28	8.42144e-26	5.91204e-26	1786	tags=35%, list=20%, signal=31%	2209/6737/3665/6402/9447/23586/64135/2215/92610/9636/81030/634/7096/9246/3133/3428/4332/8737/11314/51191/5608/53917/4615/51311/84166/834/729230/23643/10578/115004/51316/79132/7318/10855/4210/963/567/653361/7454/3106/80231/1536/6036/4214/684/3385/10875/10010/10288/64581/5691/79792/150372/6993/9641/11277/5724/1848/2992/23317/342510/2212/1540/8651/11274/3837/3107/25801/51411/115727/2207/51135/5777/2…
R-HSA-913531	Interferon Signaling	204	0.590681	2.90107	4.69517e-26	1.54002e-23	1.08112e-23	906	tags=37%, list=10%, signal=34%	8519/2209/6737/3665/115362/3659/3433/91543/6672/10346/23586/3437/64135/103/6772/5371/10410/85363/10475/5696/2634/10561/9636/2633/6773/9246/10964/3133/4940/3430/5610/51191/5608/115361/10379/24138/4939/3434/4938/3717/8638/10581/4599/2537/7318/54739/2635/3669/567/53840/3106/4600/684/3660/5724/8651/11274/3837/3107/317649/5777/8672/6041/3454/10437/7706/5770/3105/8877/3134/3383/7726/3455/9972/2175/3429
R-HSA-909733	Interferon alpha/beta signaling	61	0.807313	3.30452	5.13467e-25	1.34734e-22	9.45861e-23	906	tags=72%, list=10%, signal=65%	8519/3665/3659/3433/91543/3437/103/6772/10410/5696/2634/9636/6773/3133/4940/3430/5610/10379/24138/4939/3434/4938/8638/10581/4599/2537/54739/3669/3106/4600/684/3660/8651/11274/3837/3107/5777/6041/3454/5770/3105/3134/3455/3429
R-HSA-1280218	Adaptive Immune System	523	0.431265	2.30986	3.19213e-22	6.98013e-20	4.90021e-20	2328	tags=44%, list=26%, signal=35%	8519/2209/6737/6890/5698/6402/6891/151636/10616/29126/5696/57674/57823/127544/7096/9246/26270/3133/146722/353514/11314/2533/51191/27071/4615/5720/2213/11119/23643/7318/11024/10384/567/89790/653361/11120/7454/118788/3106/1536/11027/3385/10288/5691/51465/26118/342510/8651/140691/6892/3107/3635/5777/55008/25898/3689/6654/4012/10859/5930/7321/30011/29116/3902/6280/4067/1520/5685/253260/3937/23108/144…
R-HSA-449147	Signaling by Interleukins	334	0.435336	2.25075	1.60251e-15	3.00357e-13	2.10857e-13	2131	tags=42%, list=23%, signal=33%	1230/6772/92610/6773/1439/10538/246778/5608/3627/1234/4615/84166/834/729230/3717/3561/836/3718/5292/5691/79792/5724/1848/6813/3588/3557/8651/4001/11274/3635/51135/5777/2357/3689/6654/1154/6809/3601/8357/7132/1441/4067/9683/5685/5684/4205/5721/1432/6775/3559/8767/6777/829/3055/126961/333932/8351/5062/3563/3383/3603/6352/3684/1901/1265/5290/8454/3587/7040/84868/3932/3936/3560/10148/1385/867/257397/…
R-HSA-877300	Interferon gamma signaling	74	0.662397	2.78019	9.71195e-15	1.59276e-12	1.11815e-12	838	tags=50%, list=9%, signal=46%	2209/6737/3665/115362/3659/6672/10346/6772/5371/85363/10475/2634/2633/3133/4940/115361/10379/4939/4938/3717/8638/2635/567/53840/3106/3660/5724/8651/3107/5777/10437/7706/5770/3105/3134/3383/7726
R-HSA-198933	Immunoregulatory interactions between a Lymphoid and a non-Lymphoid cell	71	0.647504	2.71546	5.60847e-13	8.17591e-11	5.73967e-11	2081	tags=70%, list=23%, signal=55%	8519/2209/6402/57823/3133/146722/353514/11314/2213/11024/567/89790/3106/11027/3385/10288/342510/3107/3689/10859/6614/4277/3105/3695/27180/3676/916/3134/3383/79865/925/3683/2214/11006/9976/7305/3903/8778/29121/107987462/102725035/285852/933/3821/958/9437/120425/10870/5819/27036
R-HSA-6798695	Neutrophil degranulation	413	0.379345	1.9934	4.73326e-12	6.21003e-10	4.35958e-10	1779	tags=33%, list=20%, signal=28%	6402/2215/634/4332/11314/53917/51316/10855/963/567/3106/1536/6036/684/10875/10288/79792/150372/6993/5724/2992/23317/2212/3837/3107/25801/51411/2207/5777/2357/3689/338339/57826/391/683/6280/1378/2219/1520/3577/64333/9535/11240/10092/8649/326624/3101/1432/53831/29108/6279/4893/55313/1992/57126/140885/26578/27180/5873/7130/5788/961/23526/81619/84766/3683/121260/3684/160364/1265/23406/929/978/9545/70…
R-HSA-983169	Class I MHC mediated antigen processing & presentation	273	0.421154	2.14723	8.69918e-12	1.03757e-09	7.284e-10	2305	tags=41%, list=25%, signal=31%	2209/6737/6890/5698/6891/151636/10616/5696/57674/127544/7096/9246/26270/3133/51191/4615/5720/23643/7318/567/653361/3106/1536/5691/51465/26118/8651/140691/6892/3107/55008/25898/4012/5930/7321/29116/6280/1520/5685/10333/7332/5684/6478/5721/23304/140461/3105/6279/4689/7323/3134/4688/55905/7099/51132/26224/65264/929/8454/7097/695/140739/51444/54778/5699/55585/10802/26268/5682/9861/9341/9354/9867/2623…
R-HSA-1236975	Antigen processing-Cross presentation	89	0.578847	2.53347	3.65957e-11	4.00113e-09	2.80888e-09	1252	tags=42%, list=14%, signal=36%	2209/6890/5698/6891/5696/7096/3133/4615/5720/23643/567/653361/3106/1536/5691/6892/3107/4012/6280/1520/5685/10333/5684/5721/3105/6279/4689/3134/4688/7099/929/7097/695/5699/5682/9861/9341
R-HSA-72766	Translation	236	-0.402871	-2.19174	4.96319e-11	5.00901e-09	3.51643e-09	3323	tags=56%, list=37%, signal=36%	6185/6201/6141/64951/54516/6233/79590/219927/6229/6193/6224/7818/6155/1936/6137/6189/23521/6136/6730/27068/200916/51081/9789/6161/122704/124995/51065/8565/6150/1981/9669/8665/6188/84545/55037/6147/8669/65993/6128/6143/8892/6184/6235/6731/1615/6182/9553/6169/4736/6181/3921/51504/9349/1650/6135/6726/6183/7284/1938/1978/6142/6171/51121/1965/6134/6206/8668/28973/84340/3035/6191/6228/51021/1973/1977/6…
R-HSA-1500620	Meiosis	82	0.562856	2.40973	8.20281e-10	6.7263e-08	4.72201e-08	2356	tags=65%, list=26%, signal=48%	85236/4683/4001/8357/8338/8331/9985/8344/3020/3021/126961/333932/8335/8351/8348/7156/5885/8356/3018/8347/8370/8341/8334/8340/8361/8342/8346/3013/8358/23345/8968/8352/25777/3017/102724334/6118/8368/8365/675/653604/8366/26277/8339/8243/8354/3012/8970/1017/545/8350/10274/11083/8363
R-HSA-156827	L13a-mediated translational silencing of Ceruloplasmin expression	108	-0.488158	-2.36459	7.89528e-10	6.7263e-08	4.72201e-08	3318	tags=61%, list=37%, signal=39%	6201/6141/6233/6229/6193/6224/6155/6137/6189/23521/6136/200916/6161/51065/1981/8665/6188/6147/8669/6128/6143/6235/6169/4736/6181/3921/9349/6135/6142/6171/51121/1965/6134/6206/8668/6191/6228/1973/1977/6173/6202/6157/1964/26986/6232/6218/6160/6194/6165/6138/6175/6208/6132/6133/1975/6176/8662/6122/6124/6187/6146/6144/8663/6130/6125/6129
R-HSA-168898	Toll-like Receptor Cascades	134	0.489124	2.28053	8.03172e-10	6.7263e-08	4.72201e-08	1203	tags=35%, list=13%, signal=31%	3665/92610/7096/8737/5608/4615/51311/84166/23643/80231/4214/10010/79792/9641/1848/8651/11274/51135/3689/11035/7321/6280/1520/9683/7100/10333/4205/1432/6279/8767/329/7323/330/7099/121260/3684/929/8454/7097/695/1385/257397/29110/5970/81622/3656/3663
R-HSA-427359	SIRT1 negatively regulates rRNA expression	52	0.644713	2.54529	1.11582e-09	8.61151e-08	6.04547e-08	2356	tags=77%, list=26%, signal=57%	85236/8357/8338/8331/8344/23411/3020/3021/126961/333932/8335/8351/8348/9013/8356/3018/8347/8370/8341/8334/8340/8361/8342/8346/3013/8358/8968/8352/3017/102724334/8368/8365/653604/8366/8339/8354/3012/8970/8350/8363
R-HSA-9843970	Regulation of endogenous retroelements by the Human Silencing Hub (HUSH) complex	57	0.623916	2.51515	1.61608e-09	1.00967e-07	7.08807e-08	2356	tags=74%, list=26%, signal=55%	85236/8357/10179/8338/8331/8344/3020/3021/126961/333932/8335/8351/8348/8356/3018/8347/8370/8341/8334/8340/8361/8342/8346/3013/8358/8968/8352/3017/102724334/8368/8365/653604/8366/8339/8354/3012/8970/23272/8350/54737/9869/8363
R-HSA-1236974	ER-Phagosome pathway	77	0.573546	2.42753	1.61076e-09	1.00967e-07	7.08807e-08	1252	tags=39%, list=14%, signal=34%	6890/5698/6891/5696/7096/3133/4615/5720/23643/567/3106/5691/6892/3107/6280/5685/10333/5684/5721/3105/6279/3134/7099/929/7097/695/5699/5682/9861/9341
R-HSA-72613	Eukaryotic Translation Initiation	115	-0.484103	-2.36581	1.55422e-09	1.00967e-07	7.08807e-08	3416	tags=63%, list=38%, signal=40%	9045/8890/6201/6141/6233/6229/6193/6224/6155/6137/6189/23521/6136/200916/6161/51065/1981/9669/8665/6188/6147/8669/6128/6143/8892/6235/6169/4736/6181/3921/9349/6135/1978/6142/6171/51121/1965/6134/6206/8668/6191/6228/1973/1977/6173/6202/6157/1964/26986/6232/6218/6160/1983/6194/6165/6138/6175/6208/6132/6133/1975/6176/8662/6122/6124/6187/6146/6144/8663/6130/6125/6129
R-HSA-72737	Cap-dependent Translation Initiation	115	-0.484103	-2.36581	1.55422e-09	1.00967e-07	7.08807e-08	3416	tags=63%, list=38%, signal=40%	9045/8890/6201/6141/6233/6229/6193/6224/6155/6137/6189/23521/6136/200916/6161/51065/1981/9669/8665/6188/6147/8669/6128/6143/8892/6235/6169/4736/6181/3921/9349/6135/1978/6142/6171/51121/1965/6134/6206/8668/6191/6228/1973/1977/6173/6202/6157/1964/26986/6232/6218/6160/1983/6194/6165/6138/6175/6208/6132/6133/1975/6176/8662/6122/6124/6187/6146/6144/8663/6130/6125/6129
R-HSA-9616222	Transcriptional regulation of granulopoiesis	71	0.587987	2.46586	1.92673e-09	1.14903e-07	8.06646e-08	2263	tags=65%, list=25%, signal=49%	5371/85236/7913/2313/8357/1441/8338/8331/8344/2033/3020/3021/126961/333932/8335/8351/8348/6688/1385/8356/3018/8347/8370/8341/8334/8340/8361/8342/8346/3013/8358/8968/8352/3017/102724334/8368/8365/5914/653604/8366/8339/8354/3012/8970/1017/8350
R-HSA-1912408	Pre-NOTCH Transcription and Translation	78	0.569055	2.41349	2.31032e-09	1.26297e-07	8.86635e-08	2263	tags=62%, list=25%, signal=47%	4343/85236/8357/8338/8331/8344/9794/1871/2033/3020/3021/4851/126961/333932/8335/8351/8348/8356/3018/8347/8370/8341/8334/8340/8361/8342/8346/3013/8358/8968/4853/8352/3017/102724334/8368/57690/2648/8365/653604/8366/388677/8339/192670/8354/22938/3012/8970/8350
R-HSA-72312	rRNA processing	155	-0.43615	-2.23155	2.23132e-09	1.26297e-07	8.86635e-08	3275	tags=61%, list=36%, signal=39%	9045/55623/8568/6201/6141/51010/6233/6229/115939/6193/6224/10200/6155/10969/6137/6189/23521/6136/200916/6161/51065/130916/6188/6147/60528/6128/6143/51602/6235/11340/117246/6169/4736/6181/3921/51504/23246/9349/26168/118460/6135/6142/6171/51121/2091/6134/6206/6191/6228/25879/25926/6173/79050/6202/6157/6232/23481/4839/6218/6160/6194/6165/387338/6138/6175/4691/27341/6208/23160/6132/6133/51077/6176/55…
R-HSA-5334118	DNA methylation	50	0.641921	2.50757	2.83359e-09	1.48707e-07	1.04395e-07	2356	tags=76%, list=26%, signal=57%	85236/8357/8338/8331/8344/3020/3021/126961/333932/8335/8351/8348/8356/3018/8347/8370/8341/8334/8340/8361/8342/8346/3013/8358/8968/8352/3017/102724334/8368/8365/653604/8366/8339/8354/3012/8970/8350/8363
R-HSA-451927	Interleukin-2 family signaling	33	0.734451	2.61202	3.58356e-09	1.74135e-07	1.22246e-07	1907	tags=70%, list=21%, signal=55%	6772/1439/3717/3561/3718/3635/5777/6654/3601/6775/3559/6777/3563/5290/84868/3932/3560/3965/5293/2885/6655/3716/6850
R-HSA-72706	GTP hydrolysis and joining of the 60S ribosomal subunit	109	-0.489616	-2.36184	3.53103e-09	1.74135e-07	1.22246e-07	3318	tags=61%, list=37%, signal=39%	6201/6141/6233/6229/6193/6224/6155/6137/6189/23521/6136/200916/6161/51065/1981/9669/8665/6188/6147/8669/6128/6143/6235/6169/4736/6181/3921/9349/6135/6142/6171/51121/1965/6134/6206/8668/6191/6228/1973/1977/6173/6202/6157/1964/6232/6218/6160/1983/6194/6165/6138/6175/6208/6132/6133/1975/6176/8662/6122/6124/6187/6146/6144/8663/6130/6125/6129
R-HSA-9821002	Chromatin modifications during the maternal to zygotic transition (MZT)	54	0.629777	2.49953	3.89474e-09	1.82497e-07	1.28117e-07	2356	tags=74%, list=26%, signal=55%	85236/8357/8338/8331/8344/200424/3020/3021/126961/333932/8335/8351/8348/7403/8356/3018/8347/8370/8341/8334/8340/8361/8342/8346/3013/8358/8968/8352/3017/102724334/8368/8365/653604/8366/8339/8354/3012/8970/8350/8363
R-HSA-73728	RNA Polymerase I Promoter Opening	51	0.635708	2.49376	4.73057e-09	2.14018e-07	1.50245e-07	2356	tags=76%, list=26%, signal=57%	85236/8357/8338/8331/8344/3020/3021/126961/333932/8335/8351/8348/8356/3018/8347/8370/8341/8334/8340/8361/8342/8346/3013/8358/8968/8352/3017/102724334/5595/8368/8365/653604/8366/8339/8354/3012/8970/8350/8363
R-HSA-212300	PRC2 methylates histones and DNA	59	0.610441	2.48379	5.36068e-09	2.29059e-07	1.60805e-07	2356	tags=68%, list=26%, signal=51%	85236/8357/8338/8331/8344/22823/2146/3020/3021/126961/333932/8335/8351/8348/8356/3018/8347/8370/8341/8334/8340/8361/8342/8346/3013/8358/8968/8352/3017/102724334/8368/8365/653604/8366/8339/8354/3012/8970/8350/8363
R-HSA-912446	Meiotic recombination	62	0.603266	2.47902	5.41222e-09	2.29059e-07	1.60805e-07	2356	tags=69%, list=26%, signal=52%	85236/4683/8357/8338/8331/8344/3020/3021/126961/333932/8335/8351/8348/7156/8356/3018/8347/8370/8341/8334/8340/8361/8342/8346/3013/8358/8968/8352/3017/102724334/6118/8368/8365/675/653604/8366/8339/8354/3012/8970/1017/8350/8363
R-HSA-8868773	rRNA processing in the nucleus and cytosol	150	-0.436471	-2.24314	7.27404e-09	2.98236e-07	2.09368e-07	3416	tags=61%, list=38%, signal=38%	9045/55623/8568/6201/6141/51010/6233/6229/115939/6193/6224/10200/6155/10969/6137/6189/23521/6136/200916/6161/51065/6188/6147/6128/6143/51602/6235/11340/117246/6169/4736/6181/3921/51504/23246/9349/26168/118460/6135/6142/6171/51121/2091/6134/6206/6191/6228/25879/25926/6173/79050/6202/6157/6232/23481/4839/6218/6160/6194/6165/6138/6175/4691/27341/6208/23160/6132/6133/51077/6176/55131/26354/6122/11404…
R-HSA-156842	Eukaryotic Translation Elongation	89	-0.50517	-2.37795	7.76029e-09	3.0853e-07	2.16595e-07	3318	tags=66%, list=37%, signal=42%	6201/6141/6233/6229/6193/6224/6155/1936/6137/6189/23521/6136/200916/6161/51065/6188/6147/6128/6143/6235/6169/4736/6181/3921/9349/6135/1938/6142/6171/51121/6134/6206/6191/6228/6173/6202/6157/1937/1933/6232/6218/6160/6194/6165/6138/6175/6208/6132/6133/1915/6176/6122/6124/6187/6146/6144/6130/6125/6129
R-HSA-5625886	Activated PKN1 stimulates transcription of AR (androgen receptor) regulated genes KLK2 and KLK3	53	0.621948	2.45443	8.88949e-09	3.4303e-07	2.40814e-07	2356	tags=75%, list=26%, signal=56%	85236/8357/8338/8331/8344/3020/3021/126961/333932/8335/8351/10499/8348/8356/3018/8347/8370/8341/8334/8340/8361/8342/8346/3013/8358/8968/8352/3017/102724334/8368/8365/653604/8366/23081/8339/8354/3012/8970/8350/8363
R-HSA-9658195	Leishmania infection	115	0.49539	2.25441	9.84802e-09	3.58905e-07	2.51959e-07	2018	tags=47%, list=22%, signal=37%	2209/59345/79651/834/4210/7454/79792/2212/10094/7456/60/4067/63916/10092/1432/29108/2787/3709/2771/2790/3055/2687/10800/2773/2214/10628/109/695/1385/5970/719/953/808/10006/196883/5027/71/10095/113/2783/2534/2885/10093/5595/10096/7409/10109/5613/5045/6850/6714/10552/2268/9051
R-HSA-9824443	Parasitic Infection Pathways	115	0.49539	2.25441	9.84802e-09	3.58905e-07	2.51959e-07	2018	tags=47%, list=22%, signal=37%	2209/59345/79651/834/4210/7454/79792/2212/10094/7456/60/4067/63916/10092/1432/29108/2787/3709/2771/2790/3055/2687/10800/2773/2214/10628/109/695/1385/5970/719/953/808/10006/196883/5027/71/10095/113/2783/2534/2885/10093/5595/10096/7409/10109/5613/5045/6850/6714/10552/2268/9051
R-HSA-2299718	Condensation of Prophase Chromosomes	54	0.620592	2.46308	1.0384e-08	3.68211e-07	2.58492e-07	2356	tags=76%, list=26%, signal=57%	85236/8357/8338/8331/8344/3020/3021/126961/333932/8335/8351/8348/8356/3018/8347/8370/8341/8334/8340/8361/10051/8342/8346/3013/8358/8968/8352/3017/102724334/8368/8365/5925/653604/8366/8339/8354/3012/8970/8350/23133/8363
R-HSA-1474165	Reproduction	93	0.527136	2.31712	1.16891e-08	4.03581e-07	2.83322e-07	2356	tags=60%, list=26%, signal=45%	85236/4683/4001/54790/639/8357/8338/8331/9985/8344/3020/3021/126961/333932/7852/8335/8351/8348/7156/5885/8356/3018/8347/8370/8341/8334/8340/8361/8342/8346/3013/8358/23345/8968/8352/25777/3017/102724334/6118/8368/8365/675/653604/8366/26277/8339/8243/8354/3012/8970/1017/545/8350/10274/11083/8363
R-HSA-1912422	Pre-NOTCH Expression and Processing	90	0.533808	2.34546	1.29091e-08	4.34275e-07	3.0487e-07	2530	tags=62%, list=28%, signal=45%	4343/85236/8357/8338/8331/8344/9794/1871/2033/3020/3021/4851/126961/333932/8335/8351/8348/8356/3018/8347/10402/8370/8341/8334/8340/8361/8342/8346/3013/8358/8968/4853/8352/3017/102724334/8368/57690/2648/8365/6484/5045/653604/8366/388677/8339/192670/8354/22938/3012/8970/8350/489/8363/2683/8349/55534
R-HSA-1643685	Disease	1230	0.272728	1.53588	1.56384e-08	5.12939e-07	3.60094e-07	2102	tags=28%, list=23%, signal=25%	2209/83666/3665/23586/9111/64135/6772/5371/57674/9636/81030/7096/6773/9246/1439/3133/11151/8737/5610/56829/54625/197259/51191/5608/4343/3002/59345/79651/4939/1234/4615/51311/834/85236/3717/51510/23643/2959/5551/4210/29071/567/1545/7454/118788/3106/6827/4683/3718/5292/60489/684/5691/79792/93343/26127/9641/1848/2992/2120/2212/51742/80351/4001/3837/25978/3107/51411/1027/23389/51135/5777/6879/6654/27…
R-HSA-9710421	Defective pyroptosis	56	0.606292	2.42782	1.75327e-08	5.61048e-07	3.93868e-07	2356	tags=70%, list=26%, signal=52%	85236/8357/8338/8331/8344/2146/3020/3021/126961/333932/8335/8351/8348/8356/3018/8347/8370/8341/8334/8340/8361/8342/8346/3013/8358/8968/8352/3017/102724334/8368/8365/653604/8366/8339/8354/3012/8970/8350/8363
R-HSA-6791226	Major pathway of rRNA processing in the nucleolus and cytosol	142	-0.427757	-2.1654	2.03228e-08	6.34845e-07	4.45675e-07	3275	tags=58%, list=36%, signal=37%	6141/51010/6233/6229/6193/6224/10200/6155/10969/6137/6189/23521/6136/200916/6161/51065/6188/6147/6128/6143/51602/6235/11340/117246/6169/4736/6181/3921/23246/9349/26168/118460/6135/6142/6171/51121/2091/6134/6206/6191/6228/25879/25926/6173/79050/6202/6157/6232/23481/6218/6160/6194/6165/6138/6175/4691/27341/6208/23160/6132/6133/51077/6176/55131/26354/6122/114049/84916/23016/51202/6124/6187/92856/104…
R-HSA-72689	Formation of a pool of free 40S subunits	98	-0.486528	-2.33837	2.28473e-08	6.97109e-07	4.89385e-07	3318	tags=61%, list=37%, signal=39%	6201/6141/6233/6229/6193/6224/6155/6137/6189/23521/6136/200916/6161/51065/8665/6188/6147/8669/6128/6143/6235/6169/4736/6181/3921/9349/6135/6142/6171/51121/6134/6206/8668/6191/6228/6173/6202/6157/1964/6232/6218/6160/6194/6165/6138/6175/6208/6132/6133/6176/8662/6122/6124/6187/6146/6144/8663/6130/6125/6129
R-HSA-9662851	Anti-inflammatory response favouring Leishmania parasite infection	47	0.629348	2.41209	2.8002e-08	7.98667e-07	5.60682e-07	2353	tags=64%, list=26%, signal=48%	2209/59345/79651/2212/4067/1432/2787/3709/2771/2790/3055/2687/10800/2773/2214/109/1385/808/196883/113/2783/2534/5613/5045/6850/6714/2268/805/2782/54331
R-HSA-9664433	Leishmania parasite growth and survival	47	0.629348	2.41209	2.8002e-08	7.98667e-07	5.60682e-07	2353	tags=64%, list=26%, signal=48%	2209/59345/79651/2212/4067/1432/2787/3709/2771/2790/3055/2687/10800/2773/2214/109/1385/808/196883/113/2783/2534/5613/5045/6850/6714/2268/805/2782/54331
R-HSA-72764	Eukaryotic Translation Termination	88	-0.491643	-2.32512	2.75566e-08	7.98667e-07	5.60682e-07	3318	tags=64%, list=37%, signal=41%	6201/6141/6233/6229/6193/6224/6155/6137/6189/23521/6136/200916/6161/51065/6188/6147/6128/6143/6235/6169/4736/6181/3921/51504/9349/6135/6142/6171/51121/6134/6206/6191/6228/6173/6202/6157/6232/2935/6218/6160/6194/6165/6138/6175/6208/6132/6133/6176/6122/6124/6187/6146/6144/6130/6125/6129
R-HSA-3214847	HATs acetylate histones	111	0.493133	2.23909	3.29699e-08	9.20352e-07	6.46107e-07	2357	tags=59%, list=26%, signal=45%	85236/10943/339287/8357/80314/60/8338/8331/6314/8344/55167/8336/2033/112869/126961/333932/8335/8351/10499/8348/8473/8332/1810/8356/3018/8347/8370/8341/8334/8340/8361/8342/7994/8346/3013/8358/8329/317772/8968/54556/51147/8352/3017/10474/3054/85235/8368/2648/284058/8365/8520/653604/8366/8339/56943/8354/3012/11143/93624/8970/1386/55689/8350/6944/8363/8648
R-HSA-8939236	RUNX1 regulates transcription of genes involved in differentiation of HSCs	95	0.508331	2.23563	3.70932e-08	1.01388e-06	7.11767e-07	2356	tags=54%, list=26%, signal=40%	85236/4005/5691/8357/8338/5685/8331/5684/8344/3020/3021/126961/333932/8335/8351/8348/6688/8356/3018/8347/8370/8341/5682/8334/8340/9861/8361/8342/8346/3013/8358/8968/8352/3017/5692/102724334/8368/5683/8365/653604/8366/8339/8354/5719/3012/5713/8970/5689/8350/5709/8363
R-HSA-5663205	Infectious disease	795	0.295948	1.63118	3.85848e-08	1.03313e-06	7.25279e-07	1954	tags=27%, list=22%, signal=23%	2209/83666/3665/23586/9111/64135/6772/5371/57674/9636/81030/7096/6773/9246/3133/11151/8737/5610/54625/51191/5608/59345/79651/4939/1234/51311/834/85236/3717/51510/23643/2959/4210/567/7454/3106/6827/3718/60489/684/5691/79792/93343/9641/2212/51742/3837/25978/3107/23389/5777/6879/6654/11035/8357/10094/30011/7456/60/4067/8338/63916/4780/5685/8331/3454/10092/10333/5684/7706/84875/8344/11320/1432/29108/…
R-HSA-975956	Nonsense Mediated Decay (NMD) independent of the Exon Junction Complex (EJC)	91	-0.488679	-2.31076	7.28605e-08	1.87437e-06	1.31585e-06	3318	tags=64%, list=37%, signal=41%	6201/6141/6233/6229/6193/6224/6155/6137/6189/23521/6136/200916/6161/51065/1981/6188/6147/6128/6143/6235/6169/4736/6181/3921/9349/6135/6142/6171/51121/22916/6134/6206/6191/6228/6173/6202/6157/26986/6232/2935/6218/6160/6194/6165/6138/6175/6208/6132/6133/6176/6122/6124/6187/6146/6144/6130/6125/6129
R-HSA-2408522	Selenoamino acid metabolism	105	-0.455075	-2.19706	7.16464e-08	1.87437e-06	1.31585e-06	3318	tags=61%, list=37%, signal=39%	6201/6141/875/102724560/6233/6229/6193/6224/6155/7296/6137/6189/23521/6136/200916/6161/51065/6188/6147/6128/6143/6235/1615/6169/4736/6181/3921/9349/6135/79048/6142/6171/51121/6134/6206/6191/6228/6173/6202/6157/6232/3176/6218/6160/6194/6165/6138/6175/6208/6132/6133/3376/9060/51520/6176/6122/6124/6187/6146/6144/191/6130/6125/6129
R-HSA-68616	Assembly of the ORC complex at the origin of replication	54	0.599857	2.38078	7.73911e-08	1.95264e-06	1.37079e-06	2356	tags=72%, list=26%, signal=54%	85236/3837/8357/8338/8331/8344/3020/3021/126961/333932/8335/8351/8348/8356/3018/8347/8370/8341/8334/8340/8361/8342/8346/3013/8358/8968/8352/3017/102724334/8368/8365/653604/8366/8339/8354/3012/8970/8350/8363
R-HSA-156902	Peptide chain elongation	86	-0.499371	-2.36046	7.92386e-08	1.96153e-06	1.37704e-06	3318	tags=65%, list=37%, signal=42%	6201/6141/6233/6229/6193/6224/6155/6137/6189/23521/6136/200916/6161/51065/6188/6147/6128/6143/6235/6169/4736/6181/3921/9349/6135/1938/6142/6171/51121/6134/6206/6191/6228/6173/6202/6157/6232/6218/6160/6194/6165/6138/6175/6208/6132/6133/1915/6176/6122/6124/6187/6146/6144/6130/6125/6129
R-HSA-168928	DDX58/IFIH1-mediated induction of interferon-alpha/beta	61	0.575142	2.35419	8.77617e-08	2.09352e-06	1.46969e-06	1067	tags=38%, list=12%, signal=33%	3665/23586/64135/9636/9246/8737/51191/84166/79132/7318/4214/10010/9641/1540/7321/843/7706/55593/2033/7323/9140/29110/5970
R-HSA-166016	Toll Like Receptor 4 (TLR4) Cascade	117	0.469271	2.12899	8.74776e-08	2.09352e-06	1.46969e-06	1154	tags=33%, list=13%, signal=29%	3665/92610/7096/8737/5608/4615/84166/23643/4214/10010/9641/1848/8651/11274/51135/3689/11035/7321/6280/9683/10333/4205/1432/6279/8767/329/7323/330/7099/3684/929/8454/7097/695/1385/257397/29110/5970/3656
R-HSA-8939211	ESR-mediated signaling	167	0.424628	2.03859	1.44549e-07	3.38658e-06	2.37745e-06	2357	tags=49%, list=26%, signal=37%	4343/59345/85236/7391/1027/8202/8357/8338/8331/8344/2787/6667/4893/2771/2033/2790/3020/3021/126961/333932/8335/8351/8877/10499/8348/2773/5290/2957/1385/5885/8356/3018/8347/8370/8341/8334/808/8340/4318/5469/8361/7392/8342/8346/3013/8358/6722/8968/2783/8352/3017/102724334/904/5595/8368/57690/6801/1105/8365/5451/653604/6714/8366/8339/8243/192670/8354/3012/2002/3845/8970/10728/1386/8350/10274/3727/80…
R-HSA-192823	Viral mRNA Translation	86	-0.490304	-2.3176	1.67569e-07	3.85702e-06	2.70771e-06	3318	tags=64%, list=37%, signal=41%	6201/6141/6233/6229/6193/6224/6155/6137/6189/23521/6136/200916/6161/51065/2926/6188/6147/6128/6143/6235/6169/4736/6181/3921/9349/6135/6142/6171/51121/6134/6206/6191/6228/6173/6202/6157/6232/6218/6160/6194/6165/6138/6175/6208/6132/6133/6176/6122/6124/6187/6146/6144/6130/6125/6129
R-HSA-162582	Signal Transduction	1420	0.260011	1.47437	1.79682e-07	4.06453e-06	2.85339e-06	2530	tags=36%, list=28%, signal=31%	1230/2865/94240/8743/6772/5371/10616/29126/120892/9934/1439/8737/10627/23179/4343/3002/59345/3627/2867/1234/117289/4615/53829/85236/729230/3717/9938/355/9459/3561/7391/55233/653361/836/7454/118788/399/1536/26092/3718/1071/201176/81704/5691/4283/9641/5724/1848/7072/1540/8651/80351/4001/3985/9034/10672/50619/6373/115727/1027/55288/5732/51135/5777/639/2357/6654/864/5031/10287/8477/26524/10188/116984…
R-HSA-512988	Interleukin-3, Interleukin-5 and GM-CSF signaling	39	0.645923	2.37395	2.07675e-07	4.61812e-06	3.24202e-06	1907	tags=56%, list=21%, signal=45%	1439/3717/3561/3718/3635/5777/6654/4067/3559/6777/3055/3563/5290/3560/867/5293/2534/2885/7409/1399/3716/6850
R-HSA-5688426	Deubiquitination	204	0.402686	1.97775	2.15503e-07	4.71233e-06	3.30816e-06	2305	tags=39%, list=25%, signal=30%	80124/23586/64135/8737/85236/29761/5691/27430/1540/80351/11274/55288/7321/60/8338/5685/9958/8331/5684/7706/6478/6314/8344/55593/54891/8767/7048/8336/2033/329/8335/330/8348/8473/84132/7040/8332/3018/8347/8341/5682/8334/8340/9861/8342/8346/3013/8329/317772/221656/3017/10474/81847/3054/5692/3091/85235/324/10254/5683/2648/7187/51377/409/8339/4792/5719/3012/5713/55252/93624/8970/10869/7419/5689/23358/…
R-HSA-5218859	Regulated Necrosis	54	0.585921	2.32547	2.3229e-07	4.99613e-06	3.50739e-06	1126	tags=41%, list=12%, signal=36%	3659/8743/8737/197259/3002/834/355/836/79792/3660/25978/838/11035/8837/7332/329/330/8473/837/331/2319/10211
R-HSA-168273	Influenza Viral RNA Transcription and Replication	125	-0.424208	-2.11557	2.64753e-07	5.51358e-06	3.87066e-06	3424	tags=60%, list=38%, signal=38%	9688/9045/53371/6201/6141/6233/6229/6193/6224/6155/5438/6137/6189/23521/6136/200916/55746/6161/23279/51065/2926/6188/6147/6128/6143/4928/6235/5434/6169/4736/6181/3921/142/9349/6135/6142/6171/51121/3320/6134/6206/6191/6228/6173/6202/6157/6232/6396/5435/6218/6160/6194/6165/6138/9883/6175/6208/6132/6133/6176/6122/5441/6124/6187/11097/5432/6146/23511/6144/81929/6130/6125/3843/5437/6129
R-HSA-372790	Signaling by GPCR	229	0.38423	1.9241	2.63362e-07	5.51358e-06	3.87066e-06	1867	tags=38%, list=21%, signal=31%	1230/2865/9934/59345/3627/2867/1234/53829/729230/9459/4283/5724/9034/10672/6373/5732/2357/6654/5031/10287/8477/156/8843/3577/1240/53831/2787/3274/133/3709/2015/4893/2771/5142/2790/30817/7852/5534/57580/5150/6352/10800/2773/2859/5579/1901/5290/9138/2850/109/695/1385/5294/6347/1241/8698/1889/6001/719/2358/3579/808/196883/338442/10235/9826/89846/5144/5580/50650/6354/113/2783/5058/64407/5734/2885/976…
R-HSA-500792	GPCR ligand binding	88	0.50263	2.19144	2.86787e-07	5.87913e-06	4.12728e-06	1195	tags=44%, list=13%, signal=39%	1230/2865/9934/59345/3627/2867/1234/53829/729230/4283/5724/9034/6373/5732/2357/5031/8477/8843/3577/1240/2787/3274/133/2015/2790/30817/7852/6352/10800/2859/1901/6347/1241/8698/1889/719/2358/3579/338442
R-HSA-5625740	RHO GTPases activate PKNs	77	0.527141	2.23112	2.93222e-07	5.91858e-06	4.15497e-06	2263	tags=58%, list=25%, signal=44%	10627/85236/8357/8338/8331/8344/3020/3021/126961/333932/8335/8351/10499/8348/8356/3018/8347/8370/8341/8334/8340/8361/8342/8346/3013/8358/7529/8968/5058/8352/3017/102724334/8368/103910/8365/4659/653604/8366/23081/8339/8354/3012/5586/8970/8350
R-HSA-9909505	Modulation of host responses by IFN-stimulated genes	19	0.787326	2.40276	3.34209e-07	6.64367e-06	4.664e-06	1182	tags=63%, list=13%, signal=55%	23586/64135/10561/9636/9246/10964/51191/2537/7318/7706/3429/22926
R-HSA-427389	ERCC6 (CSB) and EHMT2 (G9a) positively regulate rRNA expression	60	0.548561	2.24174	3.53948e-07	6.93104e-06	4.86574e-06	2356	tags=65%, list=26%, signal=48%	85236/8357/8338/8331/8344/3020/3021/126961/333932/8335/8351/8348/8356/3018/8347/8370/8341/8334/8340/11335/8361/8342/8346/3013/8358/8968/8352/3017/102724334/8368/8365/653604/8366/8339/8354/3012/8970/8350/8363
R-HSA-2559580	Oxidative Stress Induced Senescence	101	0.474573	2.11847	4.75839e-07	9.18089e-06	6.44518e-06	2263	tags=50%, list=25%, signal=38%	5608/4343/85236/8357/8338/8331/8344/1432/1871/2146/3020/3021/126961/333932/8335/8351/8348/80012/8356/3018/8347/8370/8341/8334/8340/8361/1032/8342/8346/3013/8358/8968/8352/1911/3017/102724334/5595/8368/57690/8365/653604/8366/4217/8339/23466/192670/8354/3012/8970/8350
R-HSA-8936459	RUNX1 regulates genes involved in megakaryocyte differentiation and platelet function	73	0.520917	2.19729	5.12018e-07	9.73575e-06	6.83471e-06	2503	tags=62%, list=28%, signal=45%	4343/85236/4778/8357/8338/8331/8344/2033/3020/3021/126961/333932/8335/8351/8348/8356/3018/8347/8370/8341/8334/8340/8361/8342/8346/3013/8358/8968/8352/3017/102724334/8368/57690/8365/653604/8366/8339/192670/8354/3012/8970/8350/8363/9757/8349
R-HSA-2408557	Selenocysteine synthesis	87	-0.471722	-2.2341	5.82362e-07	1.08866e-05	7.64263e-06	3318	tags=63%, list=37%, signal=40%	6201/6141/6233/6229/6193/6224/6155/6137/6189/23521/6136/200916/6161/51065/6188/6147/6128/6143/6235/6169/4736/6181/3921/9349/6135/79048/6142/6171/51121/6134/6206/6191/6228/6173/6202/6157/6232/6218/6160/6194/6165/6138/6175/6208/6132/6133/6176/6122/6124/6187/6146/6144/6130/6125/6129
R-HSA-9705671	SARS-CoV-2 activates/modulates innate and adaptive immune responses	89	0.489172	2.14099	5.89137e-07	1.08866e-05	7.64263e-06	1204	tags=31%, list=13%, signal=28%	3665/23586/64135/6772/9636/7096/6773/3133/51311/567/3106/9641/3107/5777/3454/7706/3105/8767/3134/3455/9972/7097/23636/257397/29110/10802/3656/7555
R-HSA-68867	Assembly of the pre-replicative complex	107	0.461602	2.07676	6.49643e-07	1.18379e-05	8.31049e-06	2356	tags=50%, list=26%, signal=38%	85236/5691/3837/8357/7321/8338/5685/8331/5684/8344/3020/3021/126961/333932/8335/8351/8348/8356/3018/8347/8370/8341/5682/8334/8340/9861/8361/8342/8346/3013/8358/8968/8352/3017/5692/102724334/27338/8368/5683/8365/653604/8366/8339/8354/5719/3012/5713/8970/5689/8350/7324/5709/4176/8363
R-HSA-9816359	Maternal to zygotic transition (MZT)	85	0.500385	2.1624	6.8427e-07	1.22981e-05	8.63355e-06	2263	tags=54%, list=25%, signal=41%	85236/9337/8357/8338/8331/23405/8344/2033/200424/3020/3021/126961/333932/8335/8351/8348/4850/246175/7403/8356/3018/8347/8370/8341/8334/8340/8361/8342/8346/3013/8358/8968/8352/3017/102724334/55571/8368/4849/8365/653604/8366/8339/8354/3012/8970/8350
R-HSA-936440	Negative regulators of DDX58/IFIH1 signaling	32	0.674028	2.37822	8.00856e-07	1.40096e-05	9.83507e-06	1053	tags=47%, list=12%, signal=42%	23586/64135/9636/9246/51191/84166/7318/9641/1540/7321/7706/55593/7323/9140/29110
R-HSA-912526	Interleukin receptor SHC signaling	21	0.743679	2.32674	7.9055e-07	1.40096e-05	9.83507e-06	1812	tags=67%, list=20%, signal=53%	1439/3717/3561/3718/3635/5777/6654/3559/3563/5290/3560/5293/2885/3716
R-HSA-69002	DNA Replication Pre-Initiation	115	0.454705	2.06927	8.93418e-07	1.52229e-05	1.06868e-05	2356	tags=50%, list=26%, signal=37%	85236/5691/3837/8357/7321/8338/5685/8331/5684/8344/3020/3021/126961/333932/8335/8351/8348/8356/3018/8347/8370/8341/5682/8334/8340/9861/8361/8342/8346/3013/8358/8968/10926/8352/3017/5692/102724334/6118/27338/8368/5683/8365/653604/8366/8339/8354/5719/3012/5713/8970/1017/5689/8350/7324/5709/4176/8363
R-HSA-5689880	Ub-specific processing proteases	146	0.426266	2.01059	8.90731e-07	1.52229e-05	1.06868e-05	2305	tags=42%, list=25%, signal=32%	23586/64135/8737/85236/29761/5691/27430/1540/80351/11274/55288/8338/5685/9958/8331/5684/6478/6314/8344/8336/329/8335/330/8348/84132/8332/3018/8347/8341/5682/8334/8340/9861/8342/8346/3013/8329/317772/3017/10474/81847/5692/3091/85235/10254/5683/2648/409/8339/4792/5719/3012/5713/93624/8970/10869/7419/5689/23358/4303/5709/8517
R-HSA-5621481	C-type lectin receptors (CLRs)	102	0.474795	2.11745	9.82401e-07	1.65245e-05	1.16005e-05	2321	tags=47%, list=26%, signal=35%	3385/64581/5691/2207/338339/7321/4583/4067/50856/5685/5684/29108/26253/3709/4893/2033/5534/5062/8454/257397/4775/5970/5682/808/9861/5580/5058/7322/5692/841/2534/9039/23118/5683/6850/6714/5894/4792/5719/4586/5530/5713/3845/5689/5709/1147/8517/805
R-HSA-373076	Class A/1 (Rhodopsin-like receptors)	72	0.514656	2.17388	1.31592e-06	2.18542e-05	1.53422e-05	1195	tags=46%, list=13%, signal=40%	1230/2865/9934/3627/2867/1234/53829/729230/4283/5724/9034/6373/5732/2357/5031/8477/8843/3577/1240/3274/7852/6352/10800/2859/1901/6347/1241/8698/1889/719/2358/3579/338442
R-HSA-201722	Formation of the beta-catenin:TCF transactivating complex	70	0.52249	2.19158	1.73208e-06	2.84061e-05	1.99417e-05	2263	tags=60%, list=25%, signal=45%	85236/864/8357/8338/8331/8344/2033/3020/3021/126961/333932/8335/8351/8348/8356/3018/8347/8370/8341/8334/8340/8361/8342/8346/3013/8358/7091/8968/79577/6932/8352/3017/102724334/8368/8365/653604/8366/8339/8354/3012/8970/8350
R-HSA-5620924	Intraflagellar transport	32	-0.641308	-2.40684	1.88834e-06	3.05865e-05	2.14724e-05	1392	tags=53%, list=15%, signal=45%	57728/51668/10383/11020/23059/112752/55112/7280/57560/55764/64792/26146/255758/56912/28981/84617/26160
R-HSA-5250924	B-WICH complex positively regulates rRNA expression	73	0.504623	2.12856	1.9573e-06	3.13167e-05	2.1985e-05	2263	tags=60%, list=25%, signal=46%	85236/7913/8357/60/8338/8331/8344/2033/3020/3021/126961/333932/8335/8351/8348/9013/8356/3018/8347/8370/8341/8334/8340/8361/8342/2932/8346/3013/8358/8968/8352/3017/102724334/8368/2648/8365/653604/8366/8339/8354/23451/3012/8970/8350
R-HSA-1799339	SRP-dependent cotranslational protein targeting to membrane	109	-0.430488	-2.07662	2.08747e-06	3.29971e-05	2.31647e-05	3323	tags=58%, list=37%, signal=37%	6185/6201/6141/6233/6229/6193/6224/6155/6137/6189/23521/6136/6730/200916/9789/6161/51065/6188/6147/6128/6143/6184/6235/6731/6169/4736/6181/3921/9349/1650/6135/6726/6142/6171/51121/6134/6206/6191/6228/6173/6202/6157/6232/6218/6160/6194/6165/6138/6175/6208/6132/6133/28972/6176/58477/6122/6124/6187/6146/6144/6130/6125/6129
R-HSA-110330	Recognition and association of DNA glycosylase with site containing an affected purine	43	0.584285	2.19233	2.46203e-06	3.67067e-05	2.57689e-05	2194	tags=60%, list=24%, signal=46%	85236/8338/8331/8344/8335/8348/3018/8347/8370/8341/8334/8340/8361/8342/8346/3013/3017/102724334/8368/55247/8365/8366/26277/8339/3012/8970
R-HSA-110331	Cleavage of the damaged purine	43	0.584285	2.19233	2.46203e-06	3.67067e-05	2.57689e-05	2194	tags=60%, list=24%, signal=46%	85236/8338/8331/8344/8335/8348/3018/8347/8370/8341/8334/8340/8361/8342/8346/3013/3017/102724334/8368/55247/8365/8366/26277/8339/3012/8970
R-HSA-73927	Depurination	43	0.584285	2.19233	2.46203e-06	3.67067e-05	2.57689e-05	2194	tags=60%, list=24%, signal=46%	85236/8338/8331/8344/8335/8348/3018/8347/8370/8341/8334/8340/8361/8342/8346/3013/3017/102724334/8368/55247/8365/8366/26277/8339/3012/8970
R-HSA-927802	Nonsense-Mediated Decay (NMD)	108	-0.413744	-2.00413	2.38493e-06	3.67067e-05	2.57689e-05	3318	tags=61%, list=37%, signal=39%	6201/6141/6233/65110/6229/6193/6224/6155/6137/6189/23521/6136/200916/6161/9775/51065/1981/6188/6147/5515/6128/6143/10921/6235/22794/6169/23293/4736/6181/3921/9349/6135/6142/6171/51121/22916/6134/6206/6191/6228/6173/6202/6157/26986/6232/2935/6218/6160/6194/6165/5518/6138/6175/6208/6132/6133/6176/6122/6124/6187/6146/6144/56006/6130/6125/6129
R-HSA-975957	Nonsense Mediated Decay (NMD) enhanced by the Exon Junction Complex (EJC)	108	-0.413744	-2.00413	2.38493e-06	3.67067e-05	2.57689e-05	3318	tags=61%, list=37%, signal=39%	6201/6141/6233/65110/6229/6193/6224/6155/6137/6189/23521/6136/200916/6161/9775/51065/1981/6188/6147/5515/6128/6143/10921/6235/22794/6169/23293/4736/6181/3921/9349/6135/6142/6171/51121/22916/6134/6206/6191/6228/6173/6202/6157/26986/6232/2935/6218/6160/6194/6165/5518/6138/6175/6208/6132/6133/6176/6122/6124/6187/6146/6144/56006/6130/6125/6129
R-HSA-977225	Amyloid fiber formation	79	0.499834	2.13053	2.72455e-06	4.01642e-05	2.81961e-05	2263	tags=58%, list=25%, signal=44%	9246/85236/567/8357/8338/8331/6478/8344/3020/3021/126961/333932/8335/8351/8348/81619/8356/6653/3018/8347/8370/8341/8334/8340/8361/8342/8346/3013/8358/8968/8352/3017/102724334/9445/8368/8365/5045/653604/8366/8339/8354/3012/23385/8970/4057/8350
R-HSA-9610379	HCMV Late Events	93	0.473384	2.08084	2.84202e-06	4.14303e-05	2.9085e-05	2379	tags=54%, list=26%, signal=40%	85236/93343/25978/8357/8338/8331/8344/8336/126961/333932/8335/8351/8348/9972/8332/23636/8356/3018/8347/8370/8341/8334/8340/8361/8342/8346/3013/8358/8329/317772/8968/8352/3017/51271/85235/8368/8365/653604/8366/8339/8354/7251/91782/3012/8480/8970/8350/5119/8363/51160
R-HSA-9018519	Estrogen-dependent gene expression	121	0.429743	1.96907	2.89079e-06	4.16781e-05	2.9259e-05	2357	tags=49%, list=26%, signal=37%	4343/85236/7391/8202/8357/8338/8331/8344/6667/2033/3020/3021/126961/333932/8335/8351/10499/8348/2957/5885/8356/3018/8347/8370/8341/8334/8340/5469/8361/7392/8342/8346/3013/8358/8968/8352/3017/102724334/904/8368/57690/1105/8365/5451/653604/8366/8339/8243/192670/8354/3012/8970/10728/1386/8350/10274/3727/8363/8648
R-HSA-2559586	DNA Damage/Telomere Stress Induced Senescence	59	0.532899	2.16828	2.98051e-06	4.25046e-05	2.98392e-05	2517	tags=61%, list=28%, signal=44%	85236/4683/4001/1027/8338/8331/8344/8335/8348/3009/3018/8347/8370/8341/8334/8340/8361/8342/8346/3013/3017/102724334/8368/8365/5925/8366/26277/3007/8339/3012/8970/1017/8363/7290/8349/1026
R-HSA-157118	Signaling by NOTCH	183	0.380333	1.84779	3.59667e-06	5.07401e-05	3.56207e-05	2530	tags=45%, list=28%, signal=33%	6772/4343/3002/85236/5691/8357/8338/5685/8331/5684/8344/9794/1871/2033/3020/3021/4851/126961/333932/8335/8351/8348/10320/8454/1385/8356/3018/8347/10402/8370/8341/5682/8334/8340/9861/8361/8342/8346/3013/8358/7091/5663/11060/8968/4853/8352/3017/9759/5692/102724334/3091/8368/57690/5683/2648/8365/59/6484/5045/653604/8366/388677/409/8339/192670/8354/5719/22938/3012/5713/23385/8970/5689/8350/5709/489/8…
R-HSA-1221632	Meiotic synapsis	56	0.544794	2.18156	3.8668e-06	5.39084e-05	3.78449e-05	2356	tags=62%, list=26%, signal=47%	85236/4001/8338/8331/9985/8344/8335/8348/5885/3018/8347/8370/8341/8334/8340/8361/8342/8346/3013/23345/25777/3017/102724334/8368/8365/8366/26277/8339/8243/3012/8970/545/10274/11083/8363
R-HSA-9645723	Diseases of programmed cell death	79	0.493832	2.10494	3.90343e-06	5.39084e-05	3.78449e-05	2263	tags=54%, list=25%, signal=41%	8737/197259/85236/4001/11035/8357/8338/8331/8344/2146/3020/3021/126961/333932/8335/8351/8348/8356/3018/8347/8370/8341/8334/8340/8361/8342/8346/3013/8358/8968/8352/3017/841/102724334/8368/8365/653604/8366/8339/8354/3012/8970/8350
R-HSA-195721	Signaling by WNT	206	0.365502	1.795	4.97138e-06	6.79422e-05	4.76969e-05	2503	tags=44%, list=28%, signal=33%	4343/59345/85236/5691/80351/864/8357/8338/5685/8331/5684/8344/83999/2787/3709/2033/2790/3020/3021/126961/333932/5534/8335/8351/8348/5880/5579/331/8454/8356/3018/8347/23401/8370/8341/5682/8334/808/8340/9861/55737/8361/8342/2932/8346/1455/3013/8358/7091/8968/79577/2783/6932/8352/3017/81847/5692/102724334/51699/324/8368/57690/5683/8365/653604/8366/409/8339/192670/8354/57680/5719/5530/3012/5713/59349…
R-HSA-8878171	Transcriptional regulation by RUNX1	169	0.392392	1.88346	5.23305e-06	7.00588e-05	4.91828e-05	2503	tags=45%, list=28%, signal=33%	5371/4343/1997/85236/4005/5691/4778/8357/1378/8338/84333/5685/8331/6604/5684/1493/8344/3559/2033/3020/3021/126961/333932/8335/8351/8348/6688/5579/80012/8356/3018/8347/8370/8341/5682/8334/8340/9861/8361/8342/8346/3013/8358/8968/8352/1911/3017/5692/102724334/8368/57690/5683/9021/8365/653604/6714/8366/8339/23466/1998/192670/8354/5719/23429/3012/5713/8970/5689/8350/5709/8363/6603/196528/9757/5687/8349
R-HSA-983168	Antigen processing: Ubiquitination & Proteasome degradation	206	0.36496	1.79234	5.21969e-06	7.00588e-05	4.91828e-05	2293	tags=36%, list=25%, signal=27%	6737/151636/10616/57674/127544/9246/26270/51191/7318/5691/51465/26118/8651/140691/55008/25898/4012/5930/7321/29116/5685/7332/5684/6478/23304/140461/7323/55905/51132/26224/65264/8454/140739/51444/54778/55585/26268/5682/9861/9354/9867/26234/6049/51088/8916/7322/5692/55284/9039/197131/27338/80204/5683/9021/10193/144699/8925/55819/7320/8065/5719/54620/5713/91694/7319/26046/223082/5689/26091/7324/6389…
R-HSA-171306	Packaging Of Telomere Ends	39	0.59954	2.20348	5.90806e-06	7.82967e-05	5.4966e-05	2503	tags=69%, list=28%, signal=50%	85236/8338/8331/8344/8335/8348/3018/8347/8370/8341/8334/8340/8361/8342/8346/3013/3017/102724334/8368/8365/8366/26277/8339/3012/8970/8363/8349
R-HSA-5357905	Regulation of TNFR1 signaling	43	0.57081	2.14177	6.44965e-06	8.46194e-05	5.94046e-05	1591	tags=44%, list=18%, signal=37%	10616/8737/9641/1540/7321/7132/55072/8837/7332/329/84888/7323/330/331/29110/220213/7185/7322/841
R-HSA-5357801	Programmed Cell Death	167	0.387586	1.86076	6.87901e-06	8.9359e-05	6.2732e-05	1742	tags=32%, list=19%, signal=26%	3659/8743/8737/197259/3002/834/23643/355/836/5691/79792/3660/4001/3837/25978/51765/838/11035/5685/8837/7332/5684/329/90249/5534/5062/330/8473/7099/837/331/929/3009/2319/8428/10211/5682/9861/6304/22985/317/578/5580/7529/148022/22900/5692/841/6386/5366/5595/324/5683
R-HSA-9833110	RSV-host interactions	66	0.513084	2.12128	6.96509e-06	8.95901e-05	6.28942e-05	1225	tags=32%, list=13%, signal=28%	23586/64135/9636/6773/9246/5610/51191/4939/23643/23389/3454/10333/7706/2033/7099/3455/929/7097/9282/8341/5469
R-HSA-388396	GPCR downstream signalling	210	0.370473	1.82251	7.65023e-06	9.74476e-05	6.84103e-05	1867	tags=37%, list=21%, signal=30%	1230/2865/9934/59345/3627/2867/1234/53829/729230/9459/4283/5724/10672/6373/5732/2357/6654/5031/10287/8477/156/8843/3577/53831/2787/3274/133/3709/4893/2771/5142/2790/7852/5534/57580/5150/6352/10800/2773/5579/5290/9138/2850/109/695/1385/5294/1241/8698/6001/719/2358/3579/808/196883/338442/10235/9826/89846/5144/5580/50650/113/2783/5058/64407/5734/2885/1880/10161/5595/6655/7409/64857/5613/9475/1606
R-HSA-983705	Signaling by the B Cell Receptor (BCR)	85	0.473267	2.04521	9.95607e-06	0.0001256	8.81737e-05	2386	tags=51%, list=26%, signal=38%	27071/118788/5691/5777/6654/30011/4067/5685/5684/3709/4893/5534/5579/80228/8454/695/4775/5970/5682/808/9861/4794/5692/5293/2534/2885/933/7409/5683/2280/6850/5966/4792/5719/5530/5713/3845/5689/5709/1147/8517/805/4793
R-HSA-2559582	Senescence-Associated Secretory Phenotype (SASP)	88	0.460362	2.00715	1.00661e-05	0.000125778	8.82989e-05	2273	tags=51%, list=25%, signal=39%	85236/1027/8357/7321/8338/8331/8344/3020/3021/126961/333932/8335/8351/8348/8356/3018/5970/8347/8370/8341/8334/8340/8361/1032/8342/8346/3013/8358/8968/8352/3017/102724334/5595/27338/8368/8365/653604/8366/8339/8354/3012/8970/1017/8350/7324
R-HSA-1428517	Aerobic respiration and respiratory electron transport	186	-0.340447	-1.79014	1.05046e-05	0.000130019	9.12763e-05	3121	tags=44%, list=34%, signal=29%	2108/4696/64795/7314/4713/4719/9377/4725/9551/28958/4706/4714/493753/10476/55101/10975/10063/51241/1345/4513/9556/137682/4723/516/10296/3954/51660/1743/28976/84300/517/7381/51295/4694/4728/1738/25994/4191/57128/4726/55245/4701/54902/7388/55744/4698/518/4512/4717/4705/10131/498/6392/55572/4722/81689/57546/4509/4508/4708/1431/4538/2271/4535/3419/4541/50/4540/3313/284184/54205/7416/4537/4519/80224/1…
R-HSA-73772	RNA Polymerase I Promoter Escape	69	0.497241	2.06755	1.17228e-05	0.000143741	0.000100909	2356	tags=58%, list=26%, signal=43%	85236/8357/8338/8331/8344/3020/3021/126961/333932/8335/8351/8348/9013/8356/3018/8347/8370/8341/8334/8340/11335/8361/8342/8346/3013/8358/8968/8352/3017/102724334/8368/8365/653604/8366/8339/8354/3012/8970/8350/8363
R-HSA-9633012	Response of EIF2AK4 (GCN2) to amino acid deficiency	96	-0.417203	-1.99666	1.78179e-05	0.000216454	0.000151955	3318	tags=58%, list=37%, signal=37%	6201/6141/6233/6229/6193/6224/6155/6137/6189/23521/6136/200916/6161/51065/6188/6147/6128/6143/6235/6169/4736/6181/3921/9349/6135/6142/6171/51121/1965/6134/6206/6191/6228/6173/6202/6157/6232/10985/6218/6160/6194/6165/6138/6175/6208/6132/6133/6176/6122/6124/6187/6146/6144/6130/6125/6129
R-HSA-73929	Base-Excision Repair, AP Site Formation	47	0.544188	2.0857	2.05021e-05	0.000244534	0.000171668	2194	tags=57%, list=24%, signal=44%	85236/8338/8331/8344/8335/8348/3018/8347/8370/8341/8334/8340/8361/8342/8346/3013/8930/3017/102724334/8368/55247/8365/8366/26277/8339/3012/8970
R-HSA-2559583	Cellular Senescence	154	0.390781	1.85514	2.04527e-05	0.000244534	0.000171668	2273	tags=41%, list=25%, signal=31%	5608/4343/85236/4683/4001/1027/8357/7321/8338/8331/8344/1432/6667/1871/2146/3020/3021/126961/333932/8335/8351/8348/80012/8356/3009/3018/5970/8347/8370/8341/8334/8340/8361/1032/8342/8346/3013/8358/8968/8352/1911/3017/102724334/5595/27338/8368/57690/8365/5925/653604/8366/26277/3007/4217/8339/23466/192670/8354/3012/8970/1017/8350/7324
R-HSA-9609646	HCMV Infection	123	0.409031	1.88158	2.67323e-05	0.000315971	0.000221819	2542	tags=50%, list=28%, signal=37%	5371/85236/93343/25978/8357/8338/8331/8344/8336/2146/126961/333932/8335/8351/8348/9972/2874/8332/23636/1385/8356/3018/8347/8370/8341/8334/8340/8361/8342/8346/3013/8358/8329/317772/8968/8352/3017/51143/51271/85235/8368/8365/653604/8366/8339/8354/7251/91782/3012/8480/2002/8970/8350/5119/1616/1783/8363/51160/7846/8349/79718/27243
R-HSA-2454202	Fc epsilon receptor (FCERI) signaling	102	0.43556	1.94247	2.79531e-05	0.000327451	0.000229878	2779	tags=51%, list=31%, signal=36%	4214/5691/115727/2207/6654/7321/4067/5685/3937/5684/3709/4893/5534/5062/5290/8454/695/257397/4775/5970/5682/808/9861/10235/5058/7322/5692/2534/2885/23118/5595/7409/5683/6850/4792/5719/5530/5713/3845/5689/5709/1147/8517/805/27040/5687/10451/5532/5686/5291/4790/5336
R-HSA-6790901	rRNA modification in the nucleus and cytosol	37	-0.563057	-2.20355	3.05972e-05	0.000352136	0.000247207	1985	tags=51%, list=22%, signal=40%	2091/25879/25926/79050/4839/6194/27341/6208/23160/51077/114049/84916/51202/6187/92856/10436/55272/55226/55651
R-HSA-69306	DNA Replication	135	0.402101	1.87544	3.05603e-05	0.000352136	0.000247207	2356	tags=44%, list=26%, signal=33%	85236/5691/3837/8357/7321/8338/5685/8331/5684/8344/3020/3021/126961/333932/8335/8351/8348/8454/7156/8356/3018/8347/8370/11232/8341/5682/8334/8340/9861/8361/8342/8346/3013/8358/8968/10926/8352/3017/5692/102724334/6118/27338/8368/5683/8365/653604/8366/8339/8354/5719/3012/5713/8970/1017/5689/8350/7324/5709/4176/8363
R-HSA-110328	Recognition and association of DNA glycosylase with site containing an affected pyrimidine	45	0.55424	2.0896	3.42729e-05	0.000382941	0.000268833	2194	tags=60%, list=24%, signal=46%	85236/8338/8331/8344/8335/8348/3018/8347/8370/8341/8334/8340/8361/8342/8346/3013/8930/3017/102724334/8368/55247/8365/8366/26277/8339/3012/8970
R-HSA-110329	Cleavage of the damaged pyrimidine	45	0.55424	2.0896	3.42729e-05	0.000382941	0.000268833	2194	tags=60%, list=24%, signal=46%	85236/8338/8331/8344/8335/8348/3018/8347/8370/8341/8334/8340/8361/8342/8346/3013/8930/3017/102724334/8368/55247/8365/8366/26277/8339/3012/8970
R-HSA-73928	Depyrimidination	45	0.55424	2.0896	3.42729e-05	0.000382941	0.000268833	2194	tags=60%, list=24%, signal=46%	85236/8338/8331/8344/8335/8348/3018/8347/8370/8341/8334/8340/8361/8342/8346/3013/8930/3017/102724334/8368/55247/8365/8366/26277/8339/3012/8970
R-HSA-168181	Toll Like Receptor 7/8 (TLR7/8) Cascade	88	0.445211	1.94109	3.44414e-05	0.000382941	0.000268833	1786	tags=36%, list=20%, signal=29%	3665/92610/5608/4615/51311/84166/23643/80231/4214/1848/11274/51135/9683/4205/1432/8767/7099/121260/929/8454/1385/257397/5970/3656/3663/148022/57161/841/6283/23118/5595/28511
R-HSA-5213460	RIPK1-mediated regulated necrosis	30	0.60825	2.09807	3.63439e-05	0.00039736	0.000278955	1621	tags=50%, list=18%, signal=41%	8743/8737/197259/355/11035/8837/7332/329/330/8473/331/2319/10211/841/6386
R-HSA-5675482	Regulation of necroptotic cell death	30	0.60825	2.09807	3.63439e-05	0.00039736	0.000278955	1621	tags=50%, list=18%, signal=41%	8743/8737/197259/355/11035/8837/7332/329/330/8473/331/2319/10211/841/6386
R-HSA-9824446	Viral Infection Pathways	664	0.267269	1.45628	3.71146e-05	0.000402432	0.000282516	1922	tags=25%, list=21%, signal=21%	83666/3665/23586/9111/64135/6772/5371/9636/81030/7096/6773/9246/3133/8737/5610/54625/51191/4939/1234/51311/834/85236/3717/51510/23643/2959/567/3106/6827/3718/60489/684/5691/93343/9641/51742/3837/25978/3107/23389/5777/6879/6654/11035/8357/30011/8338/4780/5685/8331/3454/10333/5684/7706/84875/8344/11320/29108/3105/6667/8767/8336/2033/2146/3055/126961/333932/7852/8335/8351/3676/5062/3134/8348/7099/10…
R-HSA-3214815	HDACs deacetylate histones	79	0.467919	1.99449	3.76203e-05	0.000404573	0.000284019	2263	tags=56%, list=25%, signal=42%	85236/51742/8357/8338/8331/8344/8336/126961/333932/8335/8351/8348/2874/51317/8332/5926/8356/3018/8347/8370/8341/8334/8340/8361/8342/8346/3013/8358/8329/317772/8968/8352/3017/79685/85235/8368/8365/653604/8366/8339/8354/3012/8970/8350
R-HSA-9609690	HCMV Early Events	101	0.427097	1.90654	3.86221e-05	0.000411969	0.000289211	2507	tags=53%, list=28%, signal=39%	5371/85236/8357/8338/8331/8344/8336/2146/126961/333932/8335/8351/8348/9972/2874/8332/23636/1385/8356/3018/8347/8370/8341/8334/8340/8361/8342/8346/3013/8358/8329/317772/8968/8352/3017/51143/85235/8368/8365/653604/8366/8339/8354/3012/8480/2002/8970/8350/1616/1783/8363/7846/8349/79718
R-HSA-1169410	Antiviral mechanism by IFN-stimulated genes	113	0.417426	1.89598	4.29883e-05	0.000454844	0.00031931	959	tags=23%, list=11%, signal=21%	23586/103/6772/9636/9246/4940/5610/51191/5608/4939/3434/4938/8638/4599/7318/4600/11274/3837/317649/8672/6041/7706/8877/9972/2175/23636
R-HSA-9833109	Evasion by RSV of host interferon responses	20	0.69445	2.14928	4.34007e-05	0.000455534	0.000319795	882	tags=40%, list=10%, signal=36%	23586/64135/6773/5610/3454/7706/2033/3455
R-HSA-1430728	Metabolism	1227	-0.209393	-1.31124	4.51966e-05	0.000470619	0.000330385	2382	tags=30%, list=26%, signal=25%	30/137682/1635/10101/55163/4830/2356/6169/4736/54498/6181/3340/5214/4723/3921/51504/2531/23259/6844/9885/6120/516/10296/9110/79717/63826/9349/124976/9862/5688/4682/3954/11343/56922/55191/6535/11163/6135/51660/8396/81490/79048/80142/5705/1743/28976/3423/2879/29920/5833/955/80736/6142/84300/6171/51121/2525/55512/517/7381/51727/26007/55256/27034/26227/5834/3320/6134/6652/51295/4694/4728/6206/1738/45…
R-HSA-168164	Toll Like Receptor 3 (TLR3) Cascade	89	0.434125	1.90006	4.63044e-05	0.000478357	0.000335817	2854	tags=54%, list=31%, signal=37%	3665/92610/8737/5608/84166/10010/9641/1848/11274/11035/7321/9683/4205/1432/8767/329/7323/330/8454/1385/257397/29110/5970/3656/148022/7322/841/6283/23118/5595/28511/7187/4792/2002/1386/1147/8517/4793/79155/3661/7867/64127/8772/6197/1846/4790/10392/177
R-HSA-977444	GABA B receptor activation	14	0.767617	2.12551	4.72623e-05	0.000480683	0.00033745	1442	tags=79%, list=16%, signal=66%	3759/59345/2787/2771/2790/2773/109/3772/196883/113/2783
R-HSA-991365	Activation of GABAB receptors	14	0.767617	2.12551	4.72623e-05	0.000480683	0.00033745	1442	tags=79%, list=16%, signal=66%	3759/59345/2787/2771/2790/2773/109/3772/196883/113/2783
R-HSA-6806667	Metabolism of fat-soluble vitamins	21	-0.662772	-2.21587	4.77639e-05	0.000482048	0.000338408	1203	tags=43%, list=13%, signal=37%	4035/79001/6383/348/6385/1645/344/5950/4023
R-HSA-9821993	Replacement of protamines by nucleosomes in the male pronucleus	32	0.612671	2.16173	4.98864e-05	0.00049584	0.000348091	2503	tags=72%, list=28%, signal=52%	85236/8344/3020/3021/8348/3018/8347/8370/8341/8340/8361/8342/8346/3017/102724334/8368/8365/8366/8339/8970/8363/7290/8349
R-HSA-168255	Influenza Infection	143	-0.351103	-1.78015	4.96482e-05	0.00049584	0.000348091	3208	tags=53%, list=35%, signal=35%	6233/811/3838/6229/6193/6224/6155/5438/6137/6189/23521/6136/293/200916/55746/6161/23279/51065/2926/6188/6147/3836/6128/6143/4928/6235/5434/6169/4736/6181/3921/142/9349/6135/6142/6171/51121/3320/6134/6206/6191/6228/6173/6202/6157/6232/6396/5435/10898/6218/6160/6194/6165/6138/9883/6175/6208/6132/6133/6176/6122/5441/6124/6187/11097/5432/6146/23511/6144/81929/821/6130/6125/3843/5437/6129
R-HSA-9660821	ADORA2B mediated anti-inflammatory cytokines production	18	0.71688	2.14088	5.08927e-05	0.000502039	0.000352442	2353	tags=72%, list=26%, signal=54%	59345/2787/2771/2790/2773/109/1385/196883/113/2783/5613/2782/54331
R-HSA-168643	Nucleotide-binding domain, leucine rich repeat containing receptor (NLR) signaling pathways	49	0.530764	2.06279	5.41692e-05	0.000530373	0.000372333	1239	tags=37%, list=14%, signal=32%	9447/5608/834/4210/1540/58484/1432/29108/8767/329/330/837/10628/257397/5970/24145/3656/5027
R-HSA-166166	MyD88-independent TLR4 cascade	93	0.437235	1.92194	5.52107e-05	0.00053113	0.000372865	2572	tags=49%, list=28%, signal=36%	3665/92610/8737/5608/84166/23643/10010/9641/1848/11274/11035/7321/9683/4205/1432/8767/329/7323/330/7099/929/8454/1385/257397/29110/5970/3656/148022/7322/841/6283/23118/5595/28511/7187/4792/2002/1386/1147/8517/4793/79155/3661/7867/64127/8772
R-HSA-937061	TRIF (TICAM1)-mediated TLR4 signaling	93	0.437235	1.92194	5.52107e-05	0.00053113	0.000372865	2572	tags=49%, list=28%, signal=36%	3665/92610/8737/5608/84166/23643/10010/9641/1848/11274/11035/7321/9683/4205/1432/8767/329/7323/330/7099/929/8454/1385/257397/29110/5970/3656/148022/7322/841/6283/23118/5595/28511/7187/4792/2002/1386/1147/8517/4793/79155/3661/7867/64127/8772
R-HSA-5250941	Negative epigenetic regulation of rRNA expression	82	0.448702	1.92101	5.5461e-05	0.00053113	0.000372865	2263	tags=51%, list=25%, signal=39%	85236/51742/8357/8338/8331/8344/23411/3020/3021/126961/333932/8335/8351/8348/9013/8356/3018/8347/8370/8341/8334/8340/8361/8342/8346/3013/8358/11176/8968/8352/3017/102724334/79685/8368/8365/653604/8366/8339/8354/3012/8970/8350
R-HSA-75893	TNF signaling	49	0.529468	2.05775	5.70453e-05	0.000542344	0.000380737	1686	tags=43%, list=19%, signal=35%	10616/8737/9641/1540/7321/7132/55072/8837/7332/329/84888/7323/330/331/257397/29110/220213/7185/7322/841/23118
R-HSA-9845323	Regulation of endogenous retroelements by Piwi-interacting RNAs (piRNAs)	77	0.462342	1.95686	5.96014e-05	0.000554589	0.000389333	2393	tags=53%, list=26%, signal=40%	85236/8357/60/8338/8331/6604/8344/3020/3021/126961/333932/8335/8351/8348/8356/3018/8347/8370/8341/8334/8340/8361/8342/8346/3013/8358/8968/8352/3017/102724334/8368/8365/653604/8366/8339/8354/3012/8970/8350/8363/6603
R-HSA-5617472	Activation of anterior HOX genes in hindbrain development during early embryogenesis	88	0.437544	1.90767	5.93979e-05	0.000554589	0.000389333	2263	tags=50%, list=25%, signal=38%	85236/8202/8357/8338/8331/8344/9935/2033/2146/3020/3021/126961/333932/8335/8351/8348/7403/1959/8356/3018/8347/8370/8341/8334/8340/8361/8342/8346/3013/8358/8968/8352/3017/102724334/8368/8365/5914/653604/8366/8339/8354/3012/8970/8350
R-HSA-5619507	Activation of HOX genes during differentiation	88	0.437544	1.90767	5.93979e-05	0.000554589	0.000389333	2263	tags=50%, list=25%, signal=38%	85236/8202/8357/8338/8331/8344/9935/2033/2146/3020/3021/126961/333932/8335/8351/8348/7403/1959/8356/3018/8347/8370/8341/8334/8340/8361/8342/8346/3013/8358/8968/8352/3017/102724334/8368/8365/5914/653604/8366/8339/8354/3012/8970/8350
R-HSA-5357786	TNFR1-induced proapoptotic signaling	21	0.670427	2.09756	6.10463e-05	0.000564033	0.000395964	1591	tags=57%, list=18%, signal=47%	10616/8737/9641/1540/7132/55072/329/330/331/29110/220213/841
R-HSA-9705462	Inactivation of CSF3 (G-CSF) signaling	25	0.63195	2.08756	6.16035e-05	0.000565202	0.000396784	2070	tags=56%, list=23%, signal=43%	6772/3717/8651/7321/1441/4067/6777/3055/7323/7322/9021/3716/6850/8065
R-HSA-977443	GABA receptor activation	15	0.761258	2.15859	6.32685e-05	0.000573101	0.000402329	1442	tags=73%, list=16%, signal=62%	3759/59345/2787/2771/2790/2773/109/3772/196883/113/2783
R-HSA-9692916	SARS-CoV-1 activates/modulates innate immune responses	34	0.591254	2.12485	6.33381e-05	0.000573101	0.000402329	1154	tags=38%, list=13%, signal=33%	23586/9111/64135/834/684/9641/3837/11035/7706/29108/29110/5970/3656
R-HSA-418597	G alpha (z) signalling events	17	0.707956	2.09987	6.44798e-05	0.000579435	0.000406776	1442	tags=71%, list=16%, signal=59%	59345/10287/2787/2771/2790/2773/5579/109/196883/5580/113/2783
R-HSA-5686938	Regulation of TLR by endogenous ligand	12	0.776036	2.07958	6.59488e-05	0.000588604	0.000413213	927	tags=75%, list=10%, signal=67%	7096/23643/79792/6280/10333/6279/7099/929/7097
R-HSA-73887	Death Receptor Signaling	118	0.40433	1.83944	7.04411e-05	0.000624451	0.000438378	1719	tags=34%, list=19%, signal=28%	8743/10616/8737/4615/355/9459/836/9641/1540/10672/6654/7321/7132/843/55072/8837/7332/8767/329/84888/7323/57580/330/331/9138/257397/29110/5970/220213/9826/8793/89846/50650/5663/7185/7322/841/23118/6655/7409
R-HSA-9843940	Regulation of endogenous retroelements by KRAB-ZFP proteins	75	0.450485	1.89612	7.13943e-05	0.000628653	0.000441328	2356	tags=53%, list=26%, signal=40%	85236/8357/8338/8331/8344/3020/3021/126961/333932/8335/8351/8348/8356/3018/8347/8370/7767/8341/8334/8340/8361/8342/8346/3013/8358/8968/8352/3017/102724334/8368/8365/653604/8366/8339/8354/3012/8970/8350/9869/8363
R-HSA-5250913	Positive epigenetic regulation of rRNA expression	85	0.444511	1.92094	7.63684e-05	0.000667969	0.000468929	2263	tags=53%, list=25%, signal=40%	85236/7913/8357/60/8338/8331/8344/2033/3020/3021/126961/333932/8335/8351/8348/9013/8356/3018/8347/8370/8341/8334/8340/11335/8361/8342/2932/8346/3013/8358/8968/8352/3017/102724334/8368/2648/8365/653604/8366/8339/8354/23451/3012/8970/8350
R-HSA-983695	Antigen activates B Cell Receptor (BCR) leading to generation of second messengers	25	0.625666	2.06679	8.03306e-05	0.000697972	0.000489992	1907	tags=64%, list=21%, signal=51%	27071/118788/5777/6654/30011/4067/3709/80228/695/808/5293/2534/2885/933/7409/6850
R-HSA-446652	Interleukin-1 family signaling	113	0.409679	1.86079	8.8112e-05	0.000760546	0.00053392	2854	tags=48%, list=31%, signal=33%	92610/5608/4615/84166/834/5691/79792/3557/11274/51135/5777/9683/5685/5684/8767/8454/257397/29110/5970/240/5682/3656/9861/8807/57161/8809/5692/841/6283/23118/5683/28511/10068/4792/5771/5719/5778/5713/5689/5709/1147/8517/4793/79155/7850/5687/64127/5686/4790/4215/3553/10392/11047/177
R-HSA-9664323	FCGR3A-mediated IL10 synthesis	26	0.627865	2.09531	9.4444e-05	0.000804614	0.000564856	1985	tags=62%, list=22%, signal=48%	2209/2212/4067/3709/3055/2214/109/1385/808/196883/113/2534/5613/6850/6714/2268
R-HSA-2173782	Binding and Uptake of Ligands by Scavenger Receptors	25	-0.596618	-2.0914	9.42873e-05	0.000804614	0.000564856	1203	tags=52%, list=13%, signal=45%	4035/7184/3040/948/3039/3043/348/10525/81035/4481/117156/949/8685
R-HSA-3214842	HDMs demethylate histones	43	0.525626	1.97223	9.93463e-05	0.000840918	0.000590343	2356	tags=63%, list=26%, signal=47%	84159/22992/8357/80853/126961/333932/8351/7403/8356/8370/8361/5253/8358/8968/8352/221656/8368/8365/7404/653604/8366/23081/8354/8350/23210/23133/8363
R-HSA-982772	Growth hormone receptor signaling	16	0.719566	2.10116	0.000113711	0.000956338	0.00067137	710	tags=50%, list=8%, signal=46%	6772/3717/8651/5777/1154/4067/5770/6777
R-HSA-9820952	Respiratory Syncytial Virus Infection Pathway	88	0.427231	1.8627	0.000117587	0.000979742	0.0006878	1905	tags=33%, list=21%, signal=26%	23586/64135/9636/6773/9246/5610/51191/4939/23643/3837/23389/3454/10333/7706/2033/7099/3455/929/7097/9282/8341/5469/23097/9968/112950/3716/5045/5868/5878
R-HSA-195258	RHO GTPase Effectors	223	0.340788	1.69627	0.000117987	0.000979742	0.0006878	2356	tags=41%, list=26%, signal=31%	10627/85236/653361/7454/1536/3985/1027/8357/10094/7456/391/6280/60/8338/8331/10092/8344/1730/1432/752/6279/3020/3021/126961/333932/4689/8335/8351/10499/5062/4688/8348/5880/5579/695/8356/3018/8347/8370/8341/8334/808/10006/10788/8340/8361/8342/3799/8346/3013/8358/5580/7529/71/6722/10095/8968/5058/8352/3017/51143/102724334/2885/10093/5595/10096/8368/103910/5048/10109/8365/4659/9475/79682/653604/6714…
R-HSA-201681	TCF dependent signaling in response to WNT	151	0.371675	1.7599	0.000121046	0.000998816	0.000701191	2503	tags=46%, list=28%, signal=34%	85236/5691/80351/864/8357/8338/5685/8331/5684/8344/83999/2033/3020/3021/126961/333932/8335/8351/8348/331/8356/3018/8347/23401/8370/8341/5682/8334/8340/9861/8361/8342/2932/8346/1455/3013/8358/7091/8968/79577/6932/8352/3017/81847/5692/102724334/324/8368/5683/8365/653604/8366/8339/8354/57680/5719/3012/5713/59349/8970/10023/5689/8350/5709/8363/208/5687/9101/8349
R-HSA-9837999	Mitochondrial protein degradation	76	-0.413888	-1.90713	0.000129921	0.00103764	0.000728449	3019	tags=53%, list=33%, signal=35%	4719/5096/293/9377/1632/351/10476/91689/10440/4513/6182/4723/9361/27034/10939/1738/4191/23203/3329/4512/498/4722/292/56910/4508/55699/6687/1431/2271/622/4535/3419/4541/50/4540/3313/1891/4536/38/217
R-HSA-166058	MyD88:MAL(TIRAP) cascade initiated on plasma membrane	93	0.4245	1.86597	0.000130496	0.00103764	0.000728449	1154	tags=29%, list=13%, signal=26%	92610/7096/5608/4615/84166/23643/4214/1848/8651/11274/51135/6280/9683/10333/4205/1432/6279/8767/7099/929/8454/7097/695/1385/257397/5970/3656
R-HSA-168179	Toll Like Receptor TLR1:TLR2 Cascade	93	0.4245	1.86597	0.000130496	0.00103764	0.000728449	1154	tags=29%, list=13%, signal=26%	92610/7096/5608/4615/84166/23643/4214/1848/8651/11274/51135/6280/9683/10333/4205/1432/6279/8767/7099/929/8454/7097/695/1385/257397/5970/3656
R-HSA-168188	Toll Like Receptor TLR6:TLR2 Cascade	93	0.4245	1.86597	0.000130496	0.00103764	0.000728449	1154	tags=29%, list=13%, signal=26%	92610/7096/5608/4615/84166/23643/4214/1848/8651/11274/51135/6280/9683/10333/4205/1432/6279/8767/7099/929/8454/7097/695/1385/257397/5970/3656
R-HSA-181438	Toll Like Receptor 2 (TLR2) Cascade	93	0.4245	1.86597	0.000130496	0.00103764	0.000728449	1154	tags=29%, list=13%, signal=26%	92610/7096/5608/4615/84166/23643/4214/1848/8651/11274/51135/6280/9683/10333/4205/1432/6279/8767/7099/929/8454/7097/695/1385/257397/5970/3656
R-HSA-418594	G alpha (i) signalling events	103	0.414141	1.84737	0.000126905	0.00103764	0.000728449	1477	tags=37%, list=16%, signal=31%	1230/9934/59345/3627/1234/53829/729230/4283/6373/2357/10287/156/8843/3577/2787/3709/2771/5142/2790/7852/5534/6352/2773/109/1385/8698/6001/719/2358/3579/808/196883/338442/5144/5580/113/2783/64407
R-HSA-3000480	Scavenging by Class A Receptors	10	-0.785909	-2.08876	0.000135454	0.00107057	0.000751565	1117	tags=60%, list=12%, signal=53%	7184/348/81035/4481/117156/8685
R-HSA-5260271	Diseases of Immune System	25	0.61531	2.03259	0.000137682	0.00107523	0.000754838	1391	tags=60%, list=15%, signal=51%	7096/4615/23643/51135/6280/7100/10333/6279/7099/929/7097/695/5970/81622/148022
R-HSA-5602358	Diseases associated with the TLR signaling cascade	25	0.61531	2.03259	0.000137682	0.00107523	0.000754838	1391	tags=60%, list=15%, signal=51%	7096/4615/23643/51135/6280/7100/10333/6279/7099/929/7097/695/5970/81622/148022
R-HSA-72662	Activation of the mRNA upon binding of the cap-binding complex and eIFs, and subsequent binding to 43S	59	-0.451305	-1.9674	0.000160264	0.00124418	0.000873442	3607	tags=59%, list=40%, signal=36%	6203/3646/51386/6201/6233/6229/6193/6224/6189/51065/1981/8665/6188/8669/6235/3921/1978/1965/6206/8668/6191/6228/1973/1977/6202/1964/26986/6232/6218/6194/6208/1975/8662/6187/8663
R-HSA-1169408	ISG15 antiviral mechanism	64	0.476419	1.96868	0.000165359	0.00127618	0.000895907	959	tags=27%, list=11%, signal=24%	23586/6772/9636/9246/5610/51191/3434/4599/7318/4600/11274/3837/317649/8672/7706/9972/23636
R-HSA-933541	TRAF6 mediated IRF7 activation	14	0.741835	2.05412	0.000176628	0.00135016	0.000947845	1053	tags=57%, list=12%, signal=51%	3665/23586/64135/10010/9641/7706/2033/29110
R-HSA-427413	NoRC negatively regulates rRNA expression	81	0.442297	1.89334	0.000177003	0.00135016	0.000947845	2263	tags=51%, list=25%, signal=38%	85236/51742/8357/8338/8331/8344/3020/3021/126961/333932/8335/8351/8348/9013/8356/3018/8347/8370/8341/8334/8340/8361/8342/8346/3013/8358/11176/8968/8352/3017/102724334/79685/8368/8365/653604/8366/8339/8354/3012/8970/8350
R-HSA-5603041	IRAK4 deficiency (TLR2/4)	14	0.741306	2.05266	0.000180711	0.00137037	0.000962029	967	tags=79%, list=11%, signal=70%	7096/4615/23643/51135/6280/10333/6279/7099/929/7097/695
R-HSA-109582	Hemostasis	332	0.299249	1.54905	0.000181741	0.00137037	0.000962029	2040	tags=34%, list=22%, signal=27%	3659/6402/634/962/59345/3717/81704/3660/6813/6404/10672/2207/3635/23095/5777/3689/9749/6654/4778/8357/391/60/54518/4067/3937/10461/1445/832/5770/1432/2787/3709/4893/2771/57126/829/2790/5341/3020/3021/140885/126961/333932/8351/54863/3676/8140/54676/961/5880/3683/2773/5579/3684/80228/51317/5290/6546/7040/3932/5294/8356/5906/5552/830/710/23046/808/1191/2153/10235/3920/5027/3799/8793/7094/8358/5580/8…
R-HSA-975634	Retinoid metabolism and transport	20	-0.653992	-2.16431	0.000189506	0.00142075	0.0009974	778	tags=40%, list=9%, signal=37%	4035/6383/348/6385/1645/344/5950/4023
R-HSA-1433559	Regulation of KIT signaling	11	0.756319	1.9839	0.000203937	0.00152026	0.00106726	1909	tags=91%, list=21%, signal=72%	8651/5777/6654/4067/3932/867/2534/2885/10019/6714
R-HSA-5607764	CLEC7A (Dectin-1) signaling	76	0.445188	1.87592	0.000209236	0.00154224	0.00108268	2853	tags=54%, list=31%, signal=37%	64581/5691/7321/5685/5684/29108/3709/5534/8454/257397/4775/5970/5682/808/9861/5580/7322/5692/841/9039/23118/5683/6850/6714/4792/5719/5530/5713/5689/5709/1147/8517/805/5971/5687/5532/5686/4790/5336/3553/11047
R-HSA-168138	Toll Like Receptor 9 (TLR9) Cascade	90	0.42375	1.86188	0.000209037	0.00154224	0.00108268	1786	tags=34%, list=20%, signal=28%	3665/92610/5608/4615/84166/23643/80231/4214/1848/11274/51135/9683/4205/1432/8767/7099/121260/929/8454/1385/257397/5970/3656/3663/148022/57161/841/6283/23118/5595/28511
R-HSA-72702	Ribosomal scanning and start codon recognition	58	-0.447487	-1.94576	0.000217485	0.00158522	0.00111286	3607	tags=59%, list=40%, signal=36%	6203/3646/51386/6201/6233/6229/6193/6224/6189/51065/1981/8665/6188/8669/6235/3921/1965/6206/8668/6191/6228/1973/1977/6202/1964/6232/6218/1983/6194/6208/1975/8662/6187/8663
R-HSA-72649	Translation initiation complex formation	58	-0.447341	-1.94512	0.000217485	0.00158522	0.00111286	3607	tags=59%, list=40%, signal=36%	6203/3646/51386/6201/6233/6229/6193/6224/6189/51065/1981/8665/6188/8669/6235/3921/1965/6206/8668/6191/6228/1973/1977/6202/1964/26986/6232/6218/6194/6208/1975/8662/6187/8663
R-HSA-9020558	Interleukin-2 signaling	11	0.753742	1.97714	0.000224128	0.00162462	0.00114052	1907	tags=73%, list=21%, signal=58%	3561/3718/3559/6777/3932/3560/3716/6850
R-HSA-937041	IKK complex recruitment mediated by RIP1	20	0.657033	2.03347	0.000240891	0.00171255	0.00120224	1522	tags=55%, list=17%, signal=46%	8737/23643/11035/7321/329/7323/330/7099/929/148022/7322
R-HSA-73854	RNA Polymerase I Promoter Clearance	84	0.428907	1.8471	0.000241479	0.00171255	0.00120224	2263	tags=49%, list=25%, signal=37%	85236/8357/8338/8331/8344/3020/3021/126961/333932/8335/8351/8348/9013/8356/3018/8347/8370/8341/8334/8340/11335/8361/8342/8346/3013/8358/8968/8352/3017/102724334/5595/8368/2648/8365/653604/8366/8339/8354/3012/8970/8350
R-HSA-73864	RNA Polymerase I Transcription	84	0.428907	1.8471	0.000241479	0.00171255	0.00120224	2263	tags=49%, list=25%, signal=37%	85236/8357/8338/8331/8344/3020/3021/126961/333932/8335/8351/8348/9013/8356/3018/8347/8370/8341/8334/8340/11335/8361/8342/8346/3013/8358/8968/8352/3017/102724334/5595/8368/2648/8365/653604/8366/8339/8354/3012/8970/8350
R-HSA-9679506	SARS-CoV Infections	332	0.296651	1.53561	0.000237888	0.00171255	0.00120224	1954	tags=26%, list=22%, signal=21%	83666/3665/23586/9111/64135/6772/9636/81030/7096/6773/3133/8737/54625/51311/834/3717/567/3106/3718/684/9641/51742/3837/25978/3107/5777/6654/11035/30011/4780/3454/7706/84875/11320/29108/3105/6667/8767/2033/3676/3134/10800/1901/3455/143/9972/51317/7097/7405/23636/695/5926/257397/29110/10802/5970/3656/7555/4245/51125/2932/23765/7529/25921/2908/79685/2885/23118/7409/6483/79668/6484/3716/9475/3460/718…
R-HSA-611105	Respiratory electron transport	121	-0.351502	-1.7406	0.000243389	0.00171681	0.00120524	3121	tags=46%, list=34%, signal=31%	2108/4696/4713/4719/9377/4725/28958/4706/4714/493753/55101/10975/10063/51241/1345/4513/137682/4723/3954/28976/84300/7381/51295/4694/4728/25994/4191/57128/4726/55245/4701/54902/7388/55744/4698/4512/4717/4705/10131/6392/55572/4722/4708/4538/4535/4541/4540/3313/284184/54205/4537/4519/80224/4536/4514/2806
R-HSA-8983432	Interleukin-15 signaling	13	0.735731	2.00206	0.00025735	0.00180558	0.00126756	1812	tags=69%, list=20%, signal=55%	3561/3718/6654/3601/6777/3560/2885/6655/3716
R-HSA-9674555	Signaling by CSF3 (G-CSF)	30	0.569183	1.96332	0.000263394	0.00183815	0.00129042	2190	tags=53%, list=24%, signal=41%	6772/3717/8651/7321/1441/4067/6777/3055/7323/7322/2885/9021/3716/6850/8065/3845
R-HSA-9006931	Signaling by Nuclear Receptors	211	0.331955	1.63525	0.000269568	0.00187129	0.00131368	2364	tags=42%, list=26%, signal=32%	4343/59345/85236/7391/1071/1027/8202/8357/29116/8338/8331/8344/2787/6667/4893/2771/2033/2790/3020/3021/126961/333932/8335/8351/8877/10499/8348/2773/2874/5290/2957/1385/5885/8356/3018/8347/8370/8341/8334/808/8340/4318/5469/8361/7392/8342/8346/3013/8358/6722/8968/2783/19/8352/221656/6720/3017/102724334/904/5595/8368/57690/6801/1105/8365/5451/5914/653604/6714/8366/8339/8243/192670/8354/3012/2002/384…
R-HSA-9020702	Interleukin-1 signaling	91	0.413151	1.81512	0.000278373	0.00192224	0.00134945	2854	tags=48%, list=31%, signal=33%	92610/5608/4615/84166/5691/3557/11274/51135/9683/5685/5684/8767/8454/257397/5970/5682/3656/9861/57161/5692/841/6283/23118/5683/28511/4792/5719/5713/5689/5709/1147/8517/4793/79155/7850/5687/64127/5686/4790/4215/3553/10392/11047/177
R-HSA-8854691	Interleukin-20 family signaling	12	0.750998	2.01249	0.000286743	0.00196967	0.00138275	710	tags=58%, list=8%, signal=54%	6772/6773/3717/3718/3588/6775/6777
R-HSA-5602498	MyD88 deficiency (TLR2/4)	13	0.727841	1.98059	0.000334351	0.00228473	0.00160393	967	tags=77%, list=11%, signal=69%	7096/4615/23643/6280/10333/6279/7099/929/7097/695
R-HSA-2172127	DAP12 interactions	33	0.569393	2.02501	0.000347219	0.00236037	0.00165703	2480	tags=64%, list=27%, signal=46%	3133/567/3106/342510/3107/6654/3937/4893/5290/3932/695/7305/100049587/2534/2885/6850/3845/10326/3824/27040/10451
R-HSA-5689901	Metalloprotease DUBs	27	0.581602	1.95713	0.000382175	0.00258461	0.00181445	1674	tags=41%, list=18%, signal=33%	8338/8331/8336/2033/8335/8332/8334/3013/8329/317772/85235
R-HSA-211859	Biological oxidations	73	-0.401015	-1.80882	0.000386117	0.00259788	0.00182377	1853	tags=40%, list=20%, signal=32%	128/11046/2946/1727/1312/8460/54928/7358/9060/4258/123876/5447/1555/2729/95/1580/4257/29785/191/1572/8574/1593/216/1577/2052/217/4259/1066/8639
R-HSA-9856530	High laminar flow shear stress activates signaling by PIEZO1 and PECAM1:CDH5:KDR in endothelial cells	40	0.525644	1.9445	0.000395986	0.00265068	0.00186084	2467	tags=52%, list=27%, signal=38%	59345/253260/2787/133/2790/5290/109/24145/55615/808/196883/7094/113/2783/5293/2534/5586/805/2782/54331/2776
R-HSA-9842860	Regulation of endogenous retroelements	100	0.391568	1.73936	0.000398956	0.00265701	0.00186528	2393	tags=46%, list=26%, signal=34%	85236/8357/10179/60/8338/8331/6604/8344/3020/3021/126961/333932/8335/8351/8348/8356/3018/8347/8370/7767/8341/8334/8340/8361/8342/8346/3013/8358/8968/8352/3017/102724334/8368/8365/653604/8366/8339/8354/3012/8970/23272/8350/54737/9869/8363/6603
R-HSA-1266695	Interleukin-7 signaling	26	0.597294	1.99329	0.000412897	0.00273596	0.00192071	2263	tags=65%, list=25%, signal=49%	3561/3718/8651/1154/8357/6777/126961/333932/8351/8356/8358/8968/8352/3716/653604/8354/8350
R-HSA-9912633	Antigen processing: Ub, ATP-independent proteasomal degradation	19	0.658563	2.0098	0.000415785	0.00274126	0.00192442	1742	tags=58%, list=19%, signal=47%	5698/5696/5720/5691/5685/5684/5721/5699/5682/5692/5683
R-HSA-194315	Signaling by Rho GTPases	481	0.276061	1.47121	0.000440243	0.002888	0.00202744	2362	tags=36%, list=26%, signal=28%	94240/10627/117289/85236/9938/9459/653361/7454/399/1536/26092/201176/81704/4001/3985/10672/50619/1027/6654/116984/51479/8357/10094/5930/7456/391/6280/60/8338/63916/221178/56990/64333/8331/1445/10092/832/7535/8344/1730/1432/752/6279/3020/3021/126961/333932/4689/8335/8351/57580/10499/5062/4688/8348/23526/5880/5579/11329/5290/57514/9138/257106/91452/3932/695/55914/57498/8356/3018/2319/8347/393/7919/…
R-HSA-918233	TRAF3-dependent IRF activation pathway	13	0.718852	1.95613	0.000443934	0.00289772	0.00203426	1053	tags=54%, list=12%, signal=48%	3665/23586/64135/9641/7706/2033/29110
R-HSA-68875	Mitotic Prophase	112	0.383766	1.74204	0.000478166	0.00310571	0.00218028	2356	tags=49%, list=26%, signal=37%	85236/4001/8357/8338/8548/8331/8344/3020/3021/126961/333932/8335/8351/8348/5579/9972/23636/8356/3018/8347/8370/8341/8334/255919/5861/8340/8361/10051/8342/8346/3013/8358/23592/8968/9663/8352/3017/102724334/5595/8368/8365/7444/221496/5925/653604/8366/8339/8354/7112/3012/8480/8970/8350/23133/8363
R-HSA-8963898	Plasma lipoprotein assembly	10	-0.760837	-2.02212	0.000496142	0.00320659	0.0022511	899	tags=60%, list=10%, signal=54%	5034/29801/348/2/341/344
R-HSA-3247509	Chromatin modifying enzymes	217	0.322572	1.59523	0.000552418	0.0035528	0.00249415	2573	tags=44%, list=28%, signal=32%	85236/3717/10943/51742/84159/22992/339287/8357/80314/60/8338/8331/11240/6604/6314/8344/55167/80853/8336/2033/112869/2146/126961/333932/8335/8351/10499/8348/8473/2874/51317/8332/1810/7403/5926/8356/3018/5970/8347/8370/8341/8334/8340/8361/5253/8342/7994/8346/3013/8358/8329/317772/8968/54556/51147/8352/221656/3017/10474/3054/84193/79685/85235/8368/2648/284058/8365/8520/7404/653604/8366/23081/8339/56…
R-HSA-163359	Glucagon signaling in metabolic regulation	13	0.711595	1.93639	0.00057426	0.00367526	0.00258011	2353	tags=69%, list=26%, signal=51%	59345/2787/2790/109/196883/113/2783/2782/54331
R-HSA-4839726	Chromatin organization	226	0.315509	1.57311	0.000606715	0.00386413	0.0027127	2573	tags=43%, list=28%, signal=32%	85236/3717/10943/23506/51742/84159/22992/339287/8357/80314/60/8338/8331/11240/6604/6314/8344/55167/80853/8336/2033/112869/2146/126961/333932/8335/8351/10499/8348/8473/2874/51317/8332/1810/7403/5926/8356/3018/5970/8347/8370/8341/8334/8340/8361/5253/8342/7994/8346/3013/8358/8329/317772/8968/54556/51147/8352/221656/3017/10474/3054/84193/79685/85235/8368/2648/284058/8365/8520/7404/653604/8366/23081/8…
R-HSA-912694	Regulation of IFNA/IFNB signaling	12	0.728038	1.95096	0.000625366	0.00396367	0.00278258	882	tags=67%, list=10%, signal=60%	6772/6773/8651/11274/5777/3454/5770/3455
R-HSA-975155	MyD88 dependent cascade initiated on endosome	84	0.411256	1.77109	0.000675099	0.00425832	0.00298943	1786	tags=33%, list=20%, signal=27%	3665/92610/5608/4615/84166/23643/4214/1848/11274/51135/9683/4205/1432/8767/7099/929/8454/1385/257397/5970/3656/148022/57161/841/6283/23118/5595/28511
R-HSA-211000	Gene Silencing by RNA	100	0.383473	1.7034	0.000681397	0.00427748	0.00300288	2263	tags=44%, list=25%, signal=33%	85236/8357/8338/8331/23405/8344/3020/3021/126961/333932/8335/8351/8348/9972/23636/8356/3018/8347/8370/8341/8334/8340/8361/8342/8346/3013/8358/8968/8352/3017/102724334/122402/8368/57690/8365/653604/8366/8339/192670/8354/3012/8480/8970/8350
R-HSA-2187338	Visual phototransduction	38	-0.494478	-1.95673	0.000702176	0.00438693	0.00307972	372	tags=32%, list=4%, signal=30%	23173/5158/10988/4035/6383/348/9249/6385/1645/344/5950/4023
R-HSA-9716542	Signaling by Rho GTPases, Miro GTPases and RHOBTB3	494	0.271855	1.45116	0.000723195	0.00449683	0.00315687	2362	tags=36%, list=26%, signal=28%	94240/10627/117289/85236/9938/9459/653361/7454/399/1536/26092/201176/81704/4001/3985/10672/50619/1027/55288/6654/116984/51479/8357/10094/5930/7456/391/6280/60/8338/63916/221178/56990/64333/8331/1445/10092/832/7535/8344/1730/1432/752/6279/3020/3021/126961/333932/4689/8335/8351/57580/10499/5062/4688/8348/23526/5880/5579/11329/5290/57514/9138/257106/91452/3932/695/55914/57498/8356/3018/2319/8347/393…
R-HSA-76061	RNA Polymerase III Transcription Initiation From Type 1 Promoter	19	-0.61776	-2.01502	0.000735894	0.00450125	0.00315998	2773	tags=68%, list=31%, signal=48%	2975/2972/55718/5434/9533/9328/5435/51082/9330/5441/2976/171568/5437
R-HSA-5357769	Caspase activation via extrinsic apoptotic signalling pathway	21	0.613359	1.91901	0.000737413	0.00450125	0.00315998	1591	tags=52%, list=18%, signal=43%	8743/8737/23643/355/836/8837/90249/7099/929/148022/841
R-HSA-5357956	TNFR1-induced NF-kappa-B signaling pathway	27	0.566565	1.90653	0.00074449	0.00450125	0.00315998	2313	tags=56%, list=25%, signal=42%	10616/8737/1540/7132/55072/329/330/331/257397/220213/7185/23118/1147/8517/7124
R-HSA-6799198	Complex I biogenesis	59	-0.428615	-1.86849	0.000730554	0.00450125	0.00315998	3120	tags=53%, list=34%, signal=35%	4696/4713/4719/4725/4706/4714/55101/137682/4723/28976/51295/4694/4728/4726/4701/55744/4698/4717/4705/55572/4722/4708/4538/4535/4541/4540/3313/284184/4537/80224/4536
R-HSA-9860931	Response of endothelial cells to shear stress	60	0.434678	1.77635	0.000742996	0.00450125	0.00315998	2353	tags=48%, list=26%, signal=36%	6772/59345/9641/253260/5770/2787/133/5520/2790/5290/109/5970/24145/55615/808/196883/5144/7094/113/2783/5293/2534/4792/5586/1147/8517/805/2782/54331
R-HSA-5578749	Transcriptional regulation by small RNAs	87	0.401793	1.74668	0.000738421	0.00450125	0.00315998	2263	tags=46%, list=25%, signal=35%	85236/8357/8338/8331/8344/3020/3021/126961/333932/8335/8351/8348/9972/23636/8356/3018/8347/8370/8341/8334/8340/8361/8342/8346/3013/8358/8968/8352/3017/102724334/8368/8365/653604/8366/8339/8354/3012/8480/8970/8350
R-HSA-140534	Caspase activation via Death Receptors in the presence of ligand	14	0.703181	1.94709	0.000754748	0.00454234	0.00318882	1591	tags=64%, list=18%, signal=53%	8743/8737/23643/355/8837/7099/929/148022/841
R-HSA-9670095	Inhibition of DNA recombination at telomere	54	0.458689	1.8205	0.000796897	0.0047741	0.00335152	2356	tags=54%, list=26%, signal=40%	85236/8338/8331/8344/3020/3021/8335/8348/3018/8347/8370/8341/8334/8340/8361/8342/8346/3013/3017/102724334/8368/8365/8366/26277/8339/3012/8970/1616/8363
R-HSA-9725371	Nuclear events stimulated by ALK signaling in cancer	28	0.571849	1.93374	0.000825451	0.00492269	0.00345583	2002	tags=50%, list=22%, signal=39%	4343/3002/5551/5777/597/7535/8454/3587/3662/3726/5595/57690/5925/192670
R-HSA-5689896	Ovarian tumor domain proteases	28	0.569668	1.92637	0.000873534	0.0051625	0.00362419	686	tags=29%, list=8%, signal=26%	80124/23586/64135/8737/7321/7706/55593/8767
R-HSA-1268020	Mitochondrial protein import	46	-0.448223	-1.85483	0.000870142	0.0051625	0.00362419	2559	tags=50%, list=28%, signal=36%	10063/10440/516/54927/54543/10245/23203/3329/9804/498/10469/10531/51025/80273/1431/400916/50/56993/3313/7416/401505/92609/10452
R-HSA-5368287	Mitochondrial translation	60	-0.414328	-1.81105	0.000882678	0.00519316	0.00364571	3264	tags=58%, list=36%, signal=38%	64951/54516/79590/219927/7818/51081/122704/124995/6150/84545/55037/65993/6182/9553/6183/7284/28973/84340/51021/64978/64975/64969/28957/55052/51650/23107/64432/54460/11222/51073/51253/64981/64960/85476/128308
R-HSA-9609507	Protein localization	100	-0.346206	-1.66376	0.000941769	0.00551608	0.00387241	2784	tags=47%, list=31%, signal=33%	4714/351/3416/51/6804/55825/10063/10440/847/30/4358/6844/516/54927/54543/10245/3162/23203/3417/3329/9804/498/10469/3295/51024/10531/2010/3155/51025/80273/1431/400916/8540/5824/5830/50/56993/3313/7416/401505/1891/92609/7485/5195/224/1528/10452
R-HSA-606279	Deposition of new CENPA-containing nucleosomes at the centromere	49	0.470714	1.82941	0.00107169	0.0062215	0.00436763	2194	tags=53%, list=24%, signal=40%	85236/8338/8331/51773/8344/8335/8348/3018/8347/8370/8341/8334/8340/8361/8342/8346/3013/3017/102724334/8368/8365/79682/8366/8339/3012/8970
R-HSA-774815	Nucleosome assembly	49	0.470714	1.82941	0.00107169	0.0062215	0.00436763	2194	tags=53%, list=24%, signal=40%	85236/8338/8331/51773/8344/8335/8348/3018/8347/8370/8341/8334/8340/8361/8342/8346/3013/3017/102724334/8368/8365/79682/8366/8339/3012/8970
R-HSA-1433557	Signaling by SCF-KIT	31	0.540096	1.87645	0.00111395	0.00643833	0.00451985	1909	tags=58%, list=21%, signal=46%	6772/3717/8651/5777/6654/4067/2242/4893/6777/5290/3932/867/4318/2534/2885/7409/10019/6714
R-HSA-9669938	Signaling by KIT in disease	17	0.642798	1.90661	0.00115008	0.00656048	0.0046056	2190	tags=71%, list=24%, signal=54%	6772/3717/6654/4067/4893/6777/5290/3932/2534/2885/6714/3845
R-HSA-9670439	Signaling by phosphorylated juxtamembrane, extracellular and kinase domain KIT mutants	17	0.642798	1.90661	0.00115008	0.00656048	0.0046056	2190	tags=71%, list=24%, signal=54%	6772/3717/6654/4067/4893/6777/5290/3932/2534/2885/6714/3845
R-HSA-2871837	FCERI mediated NF-kB activation	57	0.443629	1.78837	0.00114222	0.00656048	0.0046056	2305	tags=42%, list=25%, signal=32%	5691/115727/2207/7321/4067/5685/5684/8454/257397/5970/5682/9861/10235/7322/5692/23118/5683/4792/5719/5713/5689/5709/1147/8517
R-HSA-416476	G alpha (q) signalling events	66	0.433851	1.7937	0.00119289	0.00677522	0.00475636	1691	tags=39%, list=19%, signal=32%	2865/59345/2867/5724/6654/5031/10287/8477/156/2787/3709/4893/2790/10800/5290/695/1385/1241/2358/10235/5580/2783/64407/2885/10161/5595
R-HSA-76002	Platelet activation, signaling and aggregation	148	0.343067	1.62261	0.00121827	0.00688954	0.00483661	2023	tags=38%, list=22%, signal=30%	59345/6813/10672/2207/5777/9749/6654/391/54518/4067/3937/1445/5770/1432/2787/3709/2771/2790/5341/54863/54676/5880/2773/5579/5290/7040/3932/5294/5906/5552/710/808/1191/2153/10235/3920/7094/5580/2783/2621/2534/2885/51571/5595/2162/7409/54495/1606/6850/6714/7114/3700/409/5894/10487/10184
R-HSA-5620971	Pyroptosis	24	0.592424	1.92411	0.00123605	0.00696006	0.00488611	873	tags=38%, list=10%, signal=34%	3659/3002/834/836/79792/3660/25978/838/837
R-HSA-5663202	Diseases of signal transduction by growth factor receptors and second messengers	335	0.284785	1.47329	0.00127123	0.00712757	0.00500371	2101	tags=29%, list=23%, signal=23%	6772/57674/56829/4343/3002/3717/5551/118788/5292/5691/26127/1848/2120/80351/51411/1027/5777/6654/391/60/54518/4067/597/5685/253260/1445/5684/7535/83999/9794/4893/11064/80853/7048/2033/6777/4851/5880/5290/8454/3587/7040/3932/55914/1385/867/5294/5906/55615/3662/7170/5682/808/9861/942/3726/3799/2932/57085/7094/8036/7529/5663/10956/71/4296/9444/2803/9759/5692/5293/81608/9321/2534/2885/5595/11221/324/…
R-HSA-622312	Inflammasomes	20	0.616343	1.90754	0.00131087	0.00731854	0.00513778	1239	tags=45%, list=14%, signal=39%	9447/834/4210/58484/29108/10628/5970/24145/5027
R-HSA-5617833	Cilium Assembly	115	-0.340597	-1.6645	0.00136575	0.00759265	0.00533021	1463	tags=28%, list=16%, signal=24%	5518/378/57728/51668/10383/10806/9793/54806/11020/583/23059/112752/55112/7280/22948/57560/4957/55142/55764/5310/64792/27241/91147/26146/255758/79600/1069/56912/28981/84617/26160/1454
R-HSA-174824	Plasma lipoprotein assembly, remodeling, and clearance	42	-0.458192	-1.84758	0.00143453	0.00794137	0.00557501	440	tags=29%, list=5%, signal=27%	5125/5034/160/29801/348/2/3069/57552/949/341/344/4023
R-HSA-5689603	UCH proteinases	76	0.409725	1.72649	0.00153054	0.00843726	0.00592314	2293	tags=42%, list=25%, signal=32%	5691/60/8338/5685/9958/8331/5684/54891/7048/8336/8335/8473/7040/8332/5682/8334/9861/3013/8329/317772/221656/3054/5692/85235/5683/51377/5719/3012/5713/55252/5689/5709
R-HSA-418555	G alpha (s) signalling events	41	0.487756	1.80936	0.00164753	0.00904419	0.00634922	1959	tags=49%, list=22%, signal=38%	59345/5732/156/53831/2787/3274/133/2771/2790/5150/2773/2850/109/196883/5144/113/2783/5734/6714/409
R-HSA-76066	RNA Polymerase III Transcription Initiation From Type 2 Promoter	18	-0.618033	-1.99397	0.0016808	0.00910211	0.00638988	2773	tags=72%, list=31%, signal=50%	2975/2972/55718/5434/9533/9328/5435/51082/9330/5441/2976/171568/5437
R-HSA-9664407	Parasite infection	47	0.465202	1.78297	0.00169971	0.00910211	0.00638988	2512	tags=62%, list=28%, signal=45%	7454/10094/7456/60/4067/63916/10092/3055/2214/695/10006/71/10095/2534/2885/10093/5595/10096/7409/10109/6850/6714/10552/2268/10163/10097/3071/10451/9844
R-HSA-9664417	Leishmania phagocytosis	47	0.465202	1.78297	0.00169971	0.00910211	0.00638988	2512	tags=62%, list=28%, signal=45%	7454/10094/7456/60/4067/63916/10092/3055/2214/695/10006/71/10095/2534/2885/10093/5595/10096/7409/10109/6850/6714/10552/2268/10163/10097/3071/10451/9844
R-HSA-9664422	FCGR3A-mediated phagocytosis	47	0.465202	1.78297	0.00169971	0.00910211	0.00638988	2512	tags=62%, list=28%, signal=45%	7454/10094/7456/60/4067/63916/10092/3055/2214/695/10006/71/10095/2534/2885/10093/5595/10096/7409/10109/6850/6714/10552/2268/10163/10097/3071/10451/9844
R-HSA-8866654	E3 ubiquitin ligases ubiquitinate target proteins	46	0.464619	1.76708	0.00169971	0.00910211	0.00638988	2273	tags=54%, list=25%, signal=41%	85236/7321/7332/8344/3105/7323/8348/3018/8347/51322/8341/8340/79139/8342/8346/54623/79577/7322/3017/56254/8339/7320/7319/8970/7324
R-HSA-975138	TRAF6 mediated induction of NFkB and MAP kinases upon TLR7/8 or 9 activation	83	0.394271	1.69624	0.00168985	0.00910211	0.00638988	2854	tags=49%, list=31%, signal=34%	92610/5608/4615/84166/23643/4214/1848/11274/51135/9683/4205/1432/8767/7099/929/8454/1385/257397/5970/3656/148022/57161/841/6283/23118/5595/28511/4792/2002/1386/1147/8517/4793/79155/7867/64127/6197/1846/4790/10392/177
R-HSA-2424491	DAP12 signaling	25	0.557189	1.84059	0.00172953	0.00922415	0.00647555	2779	tags=72%, list=31%, signal=50%	3133/567/6654/3937/4893/5290/3932/695/7305/2534/2885/6850/3845/3824/27040/10451/5291/5336
R-HSA-189445	Metabolism of porphyrins	12	-0.681	-1.89602	0.00178611	0.00948736	0.00666034	1784	tags=50%, list=20%, signal=40%	3162/11309/210/7390/7389/3163
R-HSA-9917777	Epigenetic regulation by WDR5-containing histone modifying complexes	124	0.347305	1.60009	0.00179535	0.00949797	0.00666778	2357	tags=50%, list=26%, signal=38%	85236/8202/8357/8338/8331/8344/23411/2033/112869/3020/3021/126961/333932/8335/8351/10499/8348/8473/2874/1810/7403/60481/9282/8356/3018/8347/8370/8341/8334/8340/5469/8361/8031/8342/8346/3013/8358/8968/8352/3017/10474/3054/102724334/9968/8368/2648/259282/284058/8365/5925/653604/8366/8339/8354/3012/80335/8970/51105/55689/8350/8363/8648
R-HSA-211945	Phase I - Functionalization of compounds	32	-0.508785	-1.90948	0.00192268	0.0100863	0.00708082	1073	tags=38%, list=12%, signal=33%	5447/1555/1580/29785/1572/1593/216/1577/2052/217/1066/8639
R-HSA-111931	PKA-mediated phosphorylation of CREB	11	0.696369	1.82664	0.00191808	0.0100863	0.00708082	2321	tags=64%, list=26%, signal=47%	109/1385/808/196883/113/5613/805
R-HSA-5389840	Mitochondrial translation elongation	57	-0.412858	-1.78114	0.00193316	0.0100863	0.00708082	3264	tags=58%, list=36%, signal=37%	64951/79590/219927/7818/51081/122704/124995/6150/84545/55037/65993/6182/9553/6183/7284/28973/51021/64978/64975/64969/28957/55052/51650/23107/64432/54460/11222/51073/51253/64981/64960/85476/128308
R-HSA-9679191	Potential therapeutics for SARS	82	0.387413	1.65862	0.00193731	0.0100863	0.00708082	1907	tags=34%, list=21%, signal=27%	81030/6773/8737/3717/3718/51742/6654/30011/4780/3454/3676/10800/1901/3455/51317/695/5926/29110/2908/79685/2885/7409/3716/9475/3460/5045/2280/6850
R-HSA-9855142	Cellular responses to mechanical stimuli	64	0.428112	1.76906	0.0019828	0.0102824	0.00721844	2353	tags=48%, list=26%, signal=36%	6772/59345/9641/253260/5770/2787/133/5520/2790/5290/109/5970/24145/55615/808/196883/5027/5144/7094/6696/113/2783/5293/2534/4792/5586/1147/8517/805/2782/54331
R-HSA-389359	CD28 dependent Vav1 pathway	10	0.717275	1.81499	0.0020382	0.010528	0.00739091	2051	tags=80%, list=23%, signal=62%	5062/3932/942/5058/2534/2885/7409/941
R-HSA-983170	Antigen Presentation: Folding, assembly and peptide loading of class I MHC	26	0.555371	1.85339	0.00204917	0.0105432	0.00740155	1066	tags=38%, list=12%, signal=34%	6890/6891/3133/567/3106/6892/3107/3105/3134/10802
R-HSA-72695	Formation of the ternary complex, and subsequently, the 43S complex	51	-0.428288	-1.82894	0.00213548	0.0109443	0.00768314	3607	tags=57%, list=40%, signal=34%	6203/3646/51386/6201/6233/6229/6193/6224/6189/51065/8665/6188/8669/6235/3921/1965/6206/8668/6191/6228/6202/1964/6232/6218/6194/6208/8662/6187/8663
R-HSA-1168372	Downstream signaling events of B Cell Receptor (BCR)	63	0.414486	1.7128	0.00217742	0.0111159	0.00780358	2853	tags=52%, list=31%, signal=36%	5691/5685/5684/4893/5534/5579/8454/4775/5970/5682/808/9861/4794/5692/5683/2280/5966/4792/5719/5530/5713/3845/5689/5709/1147/8517/805/4793/5687/5532/5686/4790/11047
R-HSA-6782315	tRNA modification in the nucleus and cytosol	17	-0.597671	-1.8813	0.00219865	0.0111807	0.00784911	2353	tags=71%, list=26%, signal=52%	51002/51504/81605/54888/54920/24140/55621/127253/63892/4234/55644/81890
R-HSA-5693607	Processing of DNA double-strand break ends	69	0.407052	1.69254	0.00236741	0.0119924	0.00841896	2224	tags=38%, list=25%, signal=29%	85236/4683/8344/116028/8348/7156/3018/8347/8370/8341/8340/8361/8342/8346/3364/3017/102724334/6118/8368/8365/8366/8339/151987/8970/1017/545
R-HSA-5419276	Mitochondrial translation termination	57	-0.406962	-1.7557	0.00239641	0.0120927	0.00848931	3264	tags=58%, list=36%, signal=37%	64951/54516/79590/219927/7818/51081/122704/124995/6150/84545/55037/65993/6182/9553/6183/28973/84340/51021/64978/64975/64969/28957/55052/51650/23107/64432/54460/11222/51073/51253/64981/64960/128308
R-HSA-8873719	RAB geranylgeranylation	40	0.488651	1.80766	0.00244728	0.0122551	0.00860335	2162	tags=48%, list=24%, signal=36%	53917/55647/8934/326624/51762/5873/83452/9545/201475/11021/5861/10981/339122/51552/7879/5868/5878/8766/4218
R-HSA-9754678	SARS-CoV-2 modulates host translation machinery	45	-0.428433	-1.77227	0.0024382	0.0122551	0.00860335	3607	tags=62%, list=40%, signal=38%	6203/6633/6634/6201/6233/6229/6193/6224/6189/6637/51065/6188/6606/6607/6235/3921/8487/6632/6206/6191/6228/6202/6232/6218/6194/6208/6636/6187
R-HSA-937072	TRAF6-mediated induction of TAK1 complex within TLR4 complex	11	0.684348	1.79511	0.00254104	0.0126282	0.00886526	1686	tags=64%, list=19%, signal=52%	23643/7099/929/257397/3656/148022/23118
R-HSA-975163	IRAK2 mediated activation of TAK1 complex upon TLR7/8 or 9 stimulation	11	0.684348	1.79511	0.00254104	0.0126282	0.00886526	1686	tags=64%, list=19%, signal=52%	23643/7099/929/257397/3656/148022/23118
R-HSA-69481	G2/M Checkpoints	111	0.354273	1.60859	0.00261458	0.0129446	0.00908742	2503	tags=38%, list=28%, signal=28%	85236/4683/5691/5685/5684/8344/116028/8348/7156/3018/8347/8370/8341/5682/8340/9861/8361/8342/8346/7529/3364/10926/3017/5692/102724334/6118/8368/5683/8365/8366/8339/5719/5713/8970/1017/545/5689/5709/4176/8363/5687/8349
R-HSA-9824878	Regulation of TBK1, IKKŒµ (IKBKE)-mediated activation of IRF3, IRF7	13	0.662573	1.80299	0.00268173	0.0132272	0.00928576	1872	tags=62%, list=21%, signal=49%	23643/10010/9641/7099/929/29110/148022/7187
R-HSA-8955332	Carboxyterminal post-translational modifications of tubulin	19	-0.580453	-1.89334	0.00271972	0.0133643	0.00938206	1525	tags=42%, list=17%, signal=35%	25941/10383/9654/254173/7280/54839/79841/84617
R-HSA-9010553	Regulation of expression of SLITs and ROBOs	139	-0.307972	-1.54377	0.00274764	0.0134511	0.00944299	3359	tags=52%, list=37%, signal=33%	5694/6201/5717/6141/6233/65110/6229/6193/6224/6155/10213/7314/6137/6189/23521/6136/200916/1605/6161/9775/51065/1981/6188/6147/6128/6143/10921/6235/22794/6169/6921/4736/6181/3921/9349/5688/6135/5705/6142/6171/51121/22916/6134/6206/6191/6228/6173/6202/6157/26986/6232/2935/6218/6160/6194/6165/6138/6175/6208/6132/6133/6176/7979/6122/6124/6187/6146/6144/5707/6130/6125/6129
R-HSA-975110	TRAF6 mediated IRF7 activation in TLR7/8 or 9 signaling	10	0.705798	1.78594	0.0027673	0.013497	0.00947521	402	tags=30%, list=4%, signal=29%	3665/4615/51135
R-HSA-5368286	Mitochondrial translation initiation	56	-0.393081	-1.69279	0.00278009	0.0135092	0.00948373	3264	tags=55%, list=36%, signal=36%	64951/79590/219927/7818/51081/122704/124995/6150/84545/55037/65993/6182/9553/6183/28973/51021/64978/64975/64969/28957/55052/51650/23107/64432/54460/11222/51073/51253/64981/64960/128308
R-HSA-9705683	SARS-CoV-2-host interactions	155	0.332319	1.58309	0.00279149	0.0135145	0.00948747	1354	tags=20%, list=15%, signal=17%	3665/23586/64135/6772/9636/7096/6773/3133/51311/567/3106/9641/3107/5777/3454/7706/3105/8767/3134/3455/9972/7097/7405/23636/257397/29110/10802/3656/7555/23765/7529
R-HSA-76046	RNA Polymerase III Transcription Initiation	24	-0.533351	-1.86764	0.0028974	0.0139704	0.00980752	2773	tags=58%, list=31%, signal=41%	2975/2972/55718/5434/9533/10302/9328/5435/51082/9330/5441/2976/171568/5437
R-HSA-2871809	FCERI mediated Ca+2 mobilization	26	0.546462	1.82366	0.00290695	0.0139704	0.00980752	2579	tags=65%, list=28%, signal=47%	2207/6654/4067/3937/3709/5534/695/4775/808/2885/7409/6850/5530/805/27040/10451/5532
R-HSA-9680350	Signaling by CSF1 (M-CSF) in myeloid cells	28	0.534311	1.8068	0.00307646	0.0147311	0.0103415	1909	tags=46%, list=21%, signal=37%	6772/3635/6654/4067/3055/5290/867/8563/1436/5293/2534/2885/6714
R-HSA-9931530	Phosphorylation and nuclear translocation of the CRY:PER:kinase complex	11	-0.663725	-1.80971	0.00311996	0.0148851	0.0104496	509	tags=45%, list=6%, signal=43%	8864/1457/5187/1408/1454
R-HSA-111885	Opioid Signalling	49	0.437879	1.70179	0.00319163	0.0151718	0.0106509	2579	tags=55%, list=28%, signal=40%	59345/156/2787/3709/2771/5142/2790/5534/2773/109/1385/808/196883/5144/5580/113/2783/5613/5530/805/2782/54331/2776/5330/2769/10645/5532
R-HSA-168638	NOD1/2 Signaling Pathway	30	0.514136	1.77344	0.00326404	0.01546	0.0108533	1686	tags=40%, list=19%, signal=33%	5608/834/1540/1432/8767/329/330/837/257397/3656/841/23118
R-HSA-5668599	RHO GTPases Activate NADPH Oxidases	17	0.611344	1.81331	0.00332793	0.0156688	0.0109998	1691	tags=65%, list=19%, signal=53%	653361/1536/6280/1432/6279/4689/4688/5880/5579/5580/5595
R-HSA-2029480	Fcgamma receptor (FCGR) dependent phagocytosis	70	0.400074	1.67811	0.00333201	0.0156688	0.0109998	1985	tags=43%, list=22%, signal=34%	2209/7454/2212/10094/7456/60/4067/63916/10092/3709/3055/2214/5290/695/10006/5580/71/10095/5058/2534/2885/10093/5595/10096/7409/10109/6850/6714/10552/2268
R-HSA-8874081	MET activates PTK2 signaling	10	-0.705468	-1.87496	0.00340851	0.0159713	0.0112122	1475	tags=70%, list=16%, signal=59%	3911/3913/3675/3914/3912/5747/2335
R-HSA-877312	Regulation of IFNG signaling	13	0.651358	1.77247	0.00353821	0.01652	0.0115974	2080	tags=85%, list=23%, signal=65%	6772/3717/8651/5777/5770/9021/3716/8554/3460/7341/5771
R-HSA-933543	NF-kB activation through FADD/RIP-1 pathway mediated by caspase-8 and -10	12	0.676736	1.81348	0.00361726	0.0168293	0.0118145	606	tags=42%, list=7%, signal=39%	23586/64135/8737/843/7706
R-HSA-2029482	Regulation of actin dynamics for phagocytic cup formation	49	0.434168	1.68737	0.00363402	0.0168475	0.0118273	2696	tags=59%, list=30%, signal=42%	2209/7454/2212/10094/7456/60/63916/10092/2214/695/10006/71/10095/5058/2885/10093/5595/10096/7409/10109/6850/10552/10163/10097/3071/10451/9844/4651/1072
R-HSA-9748784	Drug ADME	35	-0.451201	-1.73394	0.00368968	0.0170453	0.0119662	1697	tags=40%, list=19%, signal=33%	10057/132/7410/11309/123876/3615/682/4831/95/2030/3704/1645/8714/1066
R-HSA-8852135	Protein ubiquitination	64	0.413327	1.70797	0.00374548	0.0172424	0.0121045	2390	tags=48%, list=26%, signal=36%	85236/7321/7332/8344/3105/7323/8348/65264/3018/8347/51322/8341/8340/79139/8342/8346/54623/79577/7322/3017/55284/27338/56254/8339/7320/7319/8970/7324/55236/3093/90268
R-HSA-74158	RNA Polymerase III Transcription	26	-0.522462	-1.84001	0.00377701	0.0172663	0.0121213	2773	tags=58%, list=31%, signal=40%	2975/2972/55718/5434/9533/10302/9328/5435/51082/9330/5441/2976/171568/4782/5437
R-HSA-749476	RNA Polymerase III Abortive And Retractive Initiation	26	-0.522462	-1.84001	0.00377701	0.0172663	0.0121213	2773	tags=58%, list=31%, signal=40%	2975/2972/55718/5434/9533/10302/9328/5435/51082/9330/5441/2976/171568/4782/5437
R-HSA-1810476	RIP-mediated NFkB activation via ZBP1	15	0.65747	1.86429	0.003837	0.0174797	0.0122711	2386	tags=73%, list=26%, signal=54%	81030/8737/4615/11035/5970/148022/28511/4792/1147/8517/4793
R-HSA-6783783	Interleukin-10 signaling	41	0.46152	1.71203	0.00389	0.0176598	0.0123976	1226	tags=34%, list=14%, signal=30%	1230/3627/1234/729230/5724/3588/3557/2357/7132/3383/6352/3587/6347/942
R-HSA-381676	Glucagon-like Peptide-1 (GLP1) regulates insulin secretion	14	0.6567	1.81839	0.00398482	0.0180279	0.012656	2353	tags=57%, list=26%, signal=42%	59345/2787/3709/2790/5906/2783/2782/54331
R-HSA-373760	L1CAM interactions	58	-0.38333	-1.66679	0.00401906	0.0181203	0.0127209	1715	tags=33%, list=19%, signal=27%	1742/6709/57698/214/7410/1785/10383/5604/6195/7280/288/1808/8828/1457/160/3912/2260/8829/84617
R-HSA-2730905	Role of LAT2/NTAL/LAB on calcium mobilization	13	0.645456	1.75641	0.00426567	0.0191663	0.0134552	1907	tags=54%, list=21%, signal=43%	2207/6654/4067/5290/2534/2885/6850
R-HSA-9671555	Signaling by PDGFR in disease	18	0.601205	1.79543	0.0043275	0.0193777	0.0136036	1781	tags=56%, list=20%, signal=45%	6772/2120/51411/6654/4893/5290/2803/81608/2885/6801
R-HSA-9818564	Epigenetic regulation of gene expression by MLL3 and MLL4 complexes	99	0.357921	1.58708	0.0046294	0.0205195	0.0144051	2040	tags=46%, list=22%, signal=36%	85236/8202/8357/8338/8331/8344/23411/2033/3020/3021/126961/333932/8335/8351/10499/8348/2874/7403/60481/9282/8356/3018/8347/8370/8341/8334/8340/5469/8361/8031/8342/8346/3013/8358/8968/8352/3017/102724334/9968/8368/8365/5925/653604/8366/8339/8354
R-HSA-9841922	MLL4 and MLL3 complexes regulate expression of PPARG target genes in adipogenesis and hepatic steatosis	99	0.357921	1.58708	0.0046294	0.0205195	0.0144051	2040	tags=46%, list=22%, signal=36%	85236/8202/8357/8338/8331/8344/23411/2033/3020/3021/126961/333932/8335/8351/10499/8348/2874/7403/60481/9282/8356/3018/8347/8370/8341/8334/8340/5469/8361/8031/8342/8346/3013/8358/8968/8352/3017/102724334/9968/8368/8365/5925/653604/8366/8339/8354
R-HSA-9851695	Epigenetic regulation of adipogenesis genes by MLL3 and MLL4 complexes	99	0.357921	1.58708	0.0046294	0.0205195	0.0144051	2040	tags=46%, list=22%, signal=36%	85236/8202/8357/8338/8331/8344/23411/2033/3020/3021/126961/333932/8335/8351/10499/8348/2874/7403/60481/9282/8356/3018/8347/8370/8341/8334/8340/5469/8361/8031/8342/8346/3013/8358/8968/8352/3017/102724334/9968/8368/8365/5925/653604/8366/8339/8354
R-HSA-449836	Other interleukin signaling	18	0.595984	1.77984	0.00466295	0.0205986	0.0144607	1812	tags=56%, list=20%, signal=45%	836/6813/3588/6809/1441/3603/1436/9235/200081/3716
R-HSA-69473	G2/M DNA damage checkpoint	67	0.407482	1.67917	0.00471413	0.0207548	0.0145703	2224	tags=37%, list=25%, signal=28%	85236/4683/8344/116028/8348/7156/3018/8347/8370/8341/8340/8361/8342/8346/7529/3364/3017/102724334/6118/8368/8365/8366/8339/8970/545
R-HSA-9006335	Signaling by Erythropoietin	23	0.549284	1.76828	0.00473555	0.0207794	0.0145876	1798	tags=48%, list=20%, signal=38%	3717/6654/4067/4893/6777/5290/5294/5293/2885/7409/1399
R-HSA-168927	TICAM1, RIP1-mediated IKK complex recruitment	17	0.602435	1.78688	0.00477768	0.020825	0.0146196	1522	tags=47%, list=17%, signal=39%	8737/11035/7321/329/7323/330/148022/7322
R-HSA-9679504	Translation of Replicase and Assembly of the Replication Transcription Complex	11	0.656618	1.72237	0.00477768	0.020825	0.0146196	2931	tags=82%, list=32%, signal=55%	25978/7405/91782/81631/27243/8678/51652/5289/128866
R-HSA-71291	Metabolism of amino acids and derivatives	221	-0.259735	-1.40406	0.00484742	0.021059	0.0147839	3322	tags=51%, list=37%, signal=33%	25828/6201/5717/6141/875/102724560/6233/6229/6193/6224/6539/6155/10213/7296/6137/6189/23521/6136/3034/200916/89874/4357/6161/1892/113675/51065/4942/586/57494/6188/6147/53905/6128/6143/6235/1615/6169/4736/54498/6181/3921/63826/9349/5688/56922/6535/6135/79048/5705/1743/29920/6142/6171/51121/55256/27034/26227/6134/6206/1738/6191/6228/57407/6723/120103/6173/6202/6157/256987/6232/3176/6218/6160/6194/6…
R-HSA-9725554	Differentiation of Keratinocytes in Interfollicular Epidermis in Mammalian Skin	14	-0.624924	-1.83648	0.00490781	0.021251	0.0149186	2744	tags=64%, list=30%, signal=45%	3688/3655/360/3691/26018/3866/2171/7037/93099
R-HSA-9660826	Purinergic signaling in leishmaniasis infection	23	0.545834	1.75718	0.00512745	0.0220564	0.0154841	1239	tags=39%, list=14%, signal=34%	834/4210/79792/29108/10628/5970/719/953/5027
R-HSA-9664424	Cell recruitment (pro-inflammatory response)	23	0.545834	1.75718	0.00512745	0.0220564	0.0154841	1239	tags=39%, list=14%, signal=34%	834/4210/79792/29108/10628/5970/719/953/5027
R-HSA-1834949	Cytosolic sensors of pathogen-associated DNA	53	0.419548	1.65569	0.00530403	0.0227415	0.015965	1067	tags=26%, list=12%, signal=23%	6737/3665/9447/81030/3428/8737/4615/115004/11277/11035/2033/81844/29110/5970
R-HSA-71403	Citric acid cycle (TCA cycle)	27	-0.489486	-1.76213	0.00564723	0.0241341	0.0169427	2092	tags=44%, list=23%, signal=34%	1743/1738/4191/57128/10131/6392/81689/1431/2271/3419/50/38
R-HSA-109581	Apoptosis	138	0.330925	1.55213	0.00567834	0.0241883	0.0169807	1742	tags=28%, list=19%, signal=23%	8743/8737/3002/23643/355/836/5691/79792/4001/3837/51765/5685/8837/5684/329/90249/5534/5062/7099/331/929/3009/8428/5682/9861/6304/22985/317/578/5580/7529/148022/22900/5692/841/5366/5595/324/5683
R-HSA-8876198	RAB GEFs exchange GTP for GDP on RABs	70	0.388568	1.62985	0.00580885	0.0246641	0.0173147	2417	tags=44%, list=27%, signal=33%	57706/57589/22930/51762/7109/122553/5873/3257/201475/163486/11021/5861/58485/54453/10981/51552/22898/7879/2665/126003/5868/51622/5878/126432/10260/4218/81846/79961/80006/5866/208
R-HSA-1236978	Cross-presentation of soluble exogenous antigens (endosomes)	39	0.46257	1.70008	0.00590368	0.0249859	0.0175407	2293	tags=44%, list=25%, signal=33%	2209/5698/5696/5720/5691/5685/5684/5721/5699/5682/9861/5692/5683/5719/5713/5689/5709
R-HSA-9700206	Signaling by ALK in cancer	80	0.380275	1.62774	0.00604351	0.0254137	0.017841	2066	tags=32%, list=23%, signal=25%	6772/57674/4343/3002/5551/5777/597/7535/5290/8454/3587/3662/7170/3726/3799/2885/5595/57690/6801/5925/833/27436/192670/57448/4170/5495
R-HSA-9725370	Signaling by ALK fusions and activated point mutants	80	0.380275	1.62774	0.00604351	0.0254137	0.017841	2066	tags=32%, list=23%, signal=25%	6772/57674/4343/3002/5551/5777/597/7535/5290/8454/3587/3662/7170/3726/3799/2885/5595/57690/6801/5925/833/27436/192670/57448/4170/5495
R-HSA-392518	Signal amplification	15	0.638004	1.8091	0.00637271	0.0266878	0.0187354	2527	tags=87%, list=28%, signal=63%	59345/10672/1432/2787/2771/2790/2773/2783/6714/2782/54331/2776/2769
R-HSA-3371378	Regulation by c-FLIP	10	0.679223	1.7187	0.00642786	0.0266878	0.0187354	581	tags=40%, list=6%, signal=37%	8743/8737/355/8837
R-HSA-5218900	CASP8 activity is inhibited	10	0.679223	1.7187	0.00642786	0.0266878	0.0187354	581	tags=40%, list=6%, signal=37%	8743/8737/355/8837
R-HSA-69416	Dimerization of procaspase-8	10	0.679223	1.7187	0.00642786	0.0266878	0.0187354	581	tags=40%, list=6%, signal=37%	8743/8737/355/8837
R-HSA-9678108	SARS-CoV-1 Infection	128	0.325772	1.51219	0.00656793	0.0271834	0.0190833	1938	tags=26%, list=21%, signal=21%	83666/23586/9111/64135/8737/54625/834/684/9641/3837/25978/11035/7706/84875/29108/6667/2033/143/7405/29110/5970/3656/4245/2932/7529/6483/79668/6484/7187/5925/2280/6192/7341
R-HSA-8949613	Cristae formation	28	-0.494331	-1.81085	0.0068472	0.0280735	0.0197082	2888	tags=61%, list=32%, signal=42%	9551/8834/10476/10989/9556/516/54927/517/79135/440574/518/498/4509/4508/3313/55735/125988
R-HSA-392451	G beta:gamma signalling through PI3Kgamma	13	0.628406	1.71001	0.00684553	0.0280735	0.0197082	2417	tags=62%, list=27%, signal=45%	59345/2787/2790/5294/2783/2782/54331/208
R-HSA-4086398	Ca2+ pathway	31	0.485413	1.68647	0.00683205	0.0280735	0.0197082	2579	tags=58%, list=28%, signal=42%	4343/59345/2787/3709/2790/5534/808/2783/6932/57690/192670/5530/3845/805/2782/54331/5330/5532
R-HSA-9735869	SARS-CoV-1 modulates host translation machinery	36	-0.453288	-1.77062	0.00705635	0.0287514	0.0201841	3318	tags=58%, list=37%, signal=37%	6201/6233/6229/6193/6224/6189/51065/6188/6235/3921/3178/6206/6191/6228/6202/6232/6218/6194/6208/1915/6187
R-HSA-912631	Regulation of signaling by CBL	19	0.574014	1.75177	0.00704843	0.0287514	0.0201841	1907	tags=53%, list=21%, signal=42%	4067/3055/5290/867/5293/2534/2885/7409/1399/6850
R-HSA-5668541	TNFR2 non-canonical NF-kB pathway	63	0.38829	1.60455	0.00712054	0.028923	0.0203046	2477	tags=43%, list=27%, signal=31%	10673/5691/7132/5685/5684/329/330/8454/8764/8740/4050/5682/9861/7133/5692/9039/5683/958/7187/5719/5713/5689/5709/1147/7124/5971/5687
R-HSA-199220	Vitamin B5 (pantothenate) metabolism	12	0.654097	1.75282	0.00727025	0.0294018	0.0206407	411	tags=25%, list=5%, signal=24%	80025/5168/8875
R-HSA-3000171	Non-integrin membrane-ECM interactions	32	-0.464456	-1.74311	0.00732805	0.0294018	0.0206407	1915	tags=50%, list=21%, signal=40%	8573/3691/3911/3913/1756/6641/5154/780/51399/7057/6383/3914/3912/6385/3693/2335
R-HSA-397795	G-protein beta:gamma signalling	19	0.571004	1.74259	0.00731192	0.0294018	0.0206407	2469	tags=63%, list=27%, signal=46%	59345/9459/2787/2790/695/5294/2783/5058/2782/54331/208/5330
R-HSA-9683610	Maturation of nucleoprotein	10	0.671956	1.70031	0.0072964	0.0294018	0.0206407	1938	tags=70%, list=21%, signal=55%	83666/54625/84875/143/2932/79668/7341
R-HSA-9694676	Translation of Replicase and Assembly of the Replication Transcription Complex	12	0.652668	1.74899	0.00767044	0.0305957	0.0214789	2931	tags=75%, list=32%, signal=51%	25978/7405/91782/81631/27243/8678/51652/5289/128866
R-HSA-168142	Toll Like Receptor 10 (TLR10) Cascade	80	0.374742	1.60406	0.00771889	0.0305957	0.0214789	2854	tags=48%, list=31%, signal=33%	92610/5608/4615/84166/4214/1848/11274/51135/9683/7100/4205/1432/8767/8454/1385/257397/5970/3656/57161/841/6283/23118/5595/28511/4792/2002/1386/1147/8517/4793/79155/7867/64127/6197/1846/4790/10392/177
R-HSA-168176	Toll Like Receptor 5 (TLR5) Cascade	80	0.374742	1.60406	0.00771889	0.0305957	0.0214789	2854	tags=48%, list=31%, signal=33%	92610/5608/4615/84166/4214/1848/11274/51135/9683/7100/4205/1432/8767/8454/1385/257397/5970/3656/57161/841/6283/23118/5595/28511/4792/2002/1386/1147/8517/4793/79155/7867/64127/6197/1846/4790/10392/177
R-HSA-975871	MyD88 cascade initiated on plasma membrane	80	0.374742	1.60406	0.00771889	0.0305957	0.0214789	2854	tags=48%, list=31%, signal=33%	92610/5608/4615/84166/4214/1848/11274/51135/9683/7100/4205/1432/8767/8454/1385/257397/5970/3656/57161/841/6283/23118/5595/28511/4792/2002/1386/1147/8517/4793/79155/7867/64127/6197/1846/4790/10392/177
R-HSA-445717	Aquaporin-mediated transport	18	0.578403	1.72734	0.00775381	0.0306416	0.021511	2353	tags=61%, list=26%, signal=45%	59345/2787/2790/109/196883/366/113/2783/8766/2782/54331
R-HSA-73780	RNA Polymerase III Chain Elongation	12	-0.629945	-1.75387	0.00779906	0.0307278	0.0215716	2516	tags=67%, list=28%, signal=48%	55718/5434/9533/5435/51082/5441/171568/5437
R-HSA-5621575	CD209 (DC-SIGN) signaling	16	0.598598	1.74793	0.00801724	0.0314929	0.0221087	2476	tags=69%, list=27%, signal=50%	3385/4067/4893/2033/5062/5970/5058/2534/5894/3845/5971
R-HSA-72306	tRNA processing	60	-0.363788	-1.59014	0.00822469	0.0322113	0.0226131	2353	tags=50%, list=26%, signal=37%	55746/23279/51637/60528/4928/51002/51504/11260/81605/54888/283989/54920/24140/55621/127253/116461/6396/10898/63892/9883/25821/4234/51367/1653/11097/23511/81929/55644/81890/55687
R-HSA-936964	Activation of IRF3, IRF7 mediated by TBK1, IKKŒµ (IKBKE)	16	0.597718	1.74536	0.00827796	0.0323234	0.0226918	1391	tags=50%, list=15%, signal=42%	3665/23643/10010/9641/7099/929/29110/148022
R-HSA-1474244	Extracellular matrix organization	111	-0.303111	-1.46657	0.00843212	0.0328277	0.0230458	1475	tags=31%, list=16%, signal=26%	3911/3913/824/5033/1756/999/6641/3675/10491/5154/780/3682/682/5034/51399/7057/2006/6383/3914/11132/8751/8985/50848/3696/3912/2/977/4054/6385/8974/3693/2335/26577/667
R-HSA-5621480	Dectin-2 family	17	0.575294	1.70638	0.00854297	0.0331609	0.0232797	631	tags=35%, list=7%, signal=33%	2207/338339/4583/4067/50856/26253
R-HSA-6805567	Keratinization	30	-0.459448	-1.71318	0.00893589	0.0343852	0.0241391	2452	tags=47%, list=27%, signal=34%	11187/3872/6768/6707/3851/5493/1832/5652/23254/3856/3860/3875/8502/3866
R-HSA-6809371	Formation of the cornified envelope	30	-0.459448	-1.71318	0.00893589	0.0343852	0.0241391	2452	tags=47%, list=27%, signal=34%	11187/3872/6768/6707/3851/5493/1832/5652/23254/3856/3860/3875/8502/3866
R-HSA-418592	ADP signalling through P2Y purinoceptor 1	11	0.637751	1.67288	0.00894031	0.0343852	0.0241391	2527	tags=91%, list=28%, signal=66%	59345/1432/2787/2790/2783/6714/2782/54331/2776/2769
R-HSA-9692914	SARS-CoV-1-host interactions	87	0.352018	1.5303	0.00896321	0.0343852	0.0241391	1154	tags=18%, list=13%, signal=16%	23586/9111/64135/8737/834/684/9641/3837/11035/7706/29108/6667/2033/29110/5970/3656
R-HSA-201556	Signaling by ALK	23	0.528067	1.69998	0.00899275	0.0343979	0.0241481	910	tags=30%, list=10%, signal=27%	29126/3561/3718/5777/639/2033/5290
R-HSA-202403	TCR signaling	90	0.363444	1.59691	0.00904526	0.0344982	0.0242185	2477	tags=41%, list=27%, signal=30%	2533/7454/5691/3635/7321/5685/3937/1445/26191/5684/7535/8767/5062/916/5788/5290/8454/3932/5970/5682/9861/55824/5058/7322/5692/23118/5683/4792/5719/5713/5689/5709/1147/8517/915/27040/5687
R-HSA-3928664	Ephrin signaling	12	0.643622	1.72475	0.00913779	0.0347501	0.0243953	1909	tags=50%, list=21%, signal=40%	10627/5062/5058/6386/2534/6714
R-HSA-9013149	RAC1 GTPase cycle	130	0.319381	1.48373	0.00978529	0.0371049	0.0260485	1845	tags=34%, list=20%, signal=27%	117289/9938/9459/653361/7454/1536/201176/81704/10672/50619/6654/116984/7456/221178/64333/752/4689/57580/5062/4688/23526/5290/57514/257106/55914/393/10006/10788/51291/9826/9341/9815/23592/5058/397/57480/51347/6655/7879/7409/23616/139818/64857/7444
R-HSA-432040	Vasopressin regulates renal water homeostasis via Aquaporins	16	0.5883	1.71786	0.010103	0.0381992	0.0268167	2353	tags=62%, list=26%, signal=46%	59345/2787/2790/109/196883/113/2783/8766/2782/54331
R-HSA-1852241	Organelle biogenesis and maintenance	187	-0.264752	-1.39446	0.0102024	0.0384641	0.0270026	1392	tags=34%, list=15%, signal=29%	51134/50807/11190/9556/84790/22995/516/5442/54927/89891/84902/23408/22897/10013/517/3320/79135/55081/440574/518/5518/378/57728/498/2101/51668/10383/10806/9793/54806/23082/4509/11020/5465/4508/583/23059/112752/55112/7280/8841/22948/57560/4957/3313/55142/55735/55764/54205/5310/64792/27241/91147/125988/26146/255758/79600/1069/56912/28981/84617/26160/1454
R-HSA-9734767	Developmental Cell Lineages	34	-0.439177	-1.67175	0.0108737	0.040761	0.0286151	2413	tags=50%, list=27%, signal=37%	3655/3872/302/360/3691/760/3911/3913/26018/3914/3866/3912/2171/7037/8842/93099/2335
R-HSA-447115	Interleukin-12 family signaling	48	0.411424	1.59006	0.0108606	0.040761	0.0286151	1888	tags=35%, list=21%, signal=28%	6772/246778/3717/4001/5721/6775/829/5062/1265/3936/10148/3572/9049/6845/3185/3716/9446
R-HSA-9013694	Signaling by NOTCH4	65	0.372676	1.54669	0.0109149	0.0407987	0.0286416	3501	tags=57%, list=39%, signal=35%	5691/5685/5684/9794/2033/4851/8454/5682/9861/5663/4853/5692/5683/2648/59/5719/22938/5713/23385/5689/5709/10460/5687/55534/5686/11047/51107/102/3516/83464/182/3280/84441/55294/7316/5702/4088
R-HSA-9696270	RND2 GTPase cycle	28	-0.474813	-1.73935	0.0109924	0.0409715	0.0287629	821	tags=25%, list=9%, signal=23%	2802/8502/91544/10726/7037/224/667
R-HSA-375276	Peptide ligand-binding receptors	46	0.411946	1.56675	0.0111012	0.0412601	0.0289655	1125	tags=35%, list=12%, signal=31%	1230/3627/1234/729230/4283/9034/6373/2357/3577/7852/6352/6347/1889/719/2358/3579
R-HSA-73980	RNA Polymerase III Transcription Termination	14	-0.599283	-1.76113	0.0113561	0.0420881	0.0295468	2516	tags=64%, list=28%, signal=47%	55718/5434/9533/5435/51082/5441/171568/4782/5437
R-HSA-1474290	Collagen formation	24	-0.491068	-1.71958	0.0117043	0.0432566	0.0303671	2831	tags=67%, list=31%, signal=46%	5339/871/1298/5351/3655/64175/3691/5033/10491/5034/3914/8985/977/8974/26577/667
R-HSA-1169091	Activation of NF-kappaB in B cells	49	0.40933	1.59084	0.0120038	0.0442386	0.0310564	2853	tags=49%, list=31%, signal=34%	5691/5685/5684/5579/8454/5970/5682/9861/4794/5692/5683/5966/4792/5719/5713/5689/5709/1147/8517/4793/5687/5686/4790/11047
R-HSA-8941856	RUNX3 regulates NOTCH signaling	13	0.604989	1.64629	0.0125611	0.0461628	0.0324073	3406	tags=85%, list=38%, signal=53%	864/9794/2033/4851/2648/22938/55534/3516/182/3280/84441
R-HSA-194068	Bile acid and bile salt metabolism	17	-0.535623	-1.68599	0.0127726	0.0466786	0.0327694	104	tags=24%, list=1%, signal=23%	1593/1645/1646/8714
R-HSA-73884	Base Excision Repair	70	0.369221	1.5487	0.0127453	0.0466786	0.0327694	2194	tags=40%, list=24%, signal=31%	85236/8338/8331/8344/8335/8348/3018/8347/8370/8341/8334/8340/8361/8342/8346/3013/8930/3017/102724334/6118/8368/55247/8365/8366/26277/8339/3012/8970
R-HSA-9711097	Cellular response to starvation	135	-0.28627	-1.44213	0.0129408	0.0471621	0.0331088	3208	tags=49%, list=35%, signal=32%	6233/51382/6229/6193/6224/6155/6137/6189/23521/6136/6009/200916/6161/51065/6188/6147/6128/6143/6235/6169/4736/6181/3921/9349/6135/6142/6171/51121/1965/6134/6206/6191/6228/6173/6202/6157/6232/83667/6396/10985/6218/6160/6194/6165/6138/6175/6208/6132/6133/23334/153129/55846/6176/652968/79726/6122/57521/64223/6124/6187/6146/6144/81929/6130/6125/6129
R-HSA-3000170	Syndecan interactions	15	-0.575004	-1.73281	0.0130721	0.0473774	0.03326	879	tags=67%, list=10%, signal=60%	3688/3655/8573/3691/51399/7057/6383/6385/3693/2335
R-HSA-5663213	RHO GTPases Activate WASPs and WAVEs	29	0.4728	1.61523	0.0130555	0.0473774	0.03326	2396	tags=62%, list=26%, signal=46%	7454/10094/7456/60/10092/695/10006/71/10095/2885/10093/5595/10096/10109/10552/10163/10097/3071
R-HSA-9634597	GPER1 signaling	20	0.544723	1.68588	0.0132548	0.0479072	0.0336319	2353	tags=60%, list=26%, signal=45%	59345/2787/2771/2790/2773/109/196883/113/2783/6714/2782/54331
R-HSA-3214858	RMTs methylate histone arginines	62	0.387642	1.59295	0.0135463	0.0488261	0.034277	2425	tags=52%, list=27%, signal=38%	3717/8357/8338/8331/6604/8336/126961/333932/8335/8351/8332/8356/8370/8334/8361/3013/8358/8329/317772/8968/8352/85235/8368/8365/653604/8366/8354/3012/8350/8363/6603/196528
R-HSA-9027276	Erythropoietin activates Phosphoinositide-3-kinase (PI3K)	10	0.640785	1.62144	0.0138576	0.0498116	0.0349688	1584	tags=50%, list=17%, signal=41%	3717/4067/5290/5294/5293

## Sheet: B (IPC v CTRL)
ID	Description	setSize	enrichmentScore	NES	pvalue	p.adjust	qvalue	rank	leading_edge	core_enrichment
R-HSA-1430728	Metabolism	1227	-0.326998	-1.89447	2.66966e-21	3.50259e-18	2.83827e-18	2045	tags=33%, list=23%, signal=29%	6165/79143/3376/2582/100131187/25852/1785/6210/10025/210/10975/11145/5296/29920/51218/4074/4719/4715/6227/6817/5692/64777/1329/109/2639/5294/28982/2271/6382/8574/9791/7388/4725/6158/55902/10423/81490/1340/375/955/27034/84320/6228/56994/6189/3313/3291/4144/6256/64834/5210/6147/79626/3028/79887/51520/23511/2821/2194/6342/6230/271/2531/6224/27158/6301/9049/1632/2108/23396/6888/10005/6173/4723/440/79…
R-HSA-72766	Translation	236	-0.510828	-2.59279	3.09457e-20	2.03004e-17	1.64501e-17	2720	tags=62%, list=30%, signal=44%	6201/6203/9349/3035/3921/6169/55176/16/55037/23107/6208/6152/6143/6141/6157/65993/85476/6133/6206/6235/64960/28973/6134/84545/8667/3646/51650/6204/51121/23478/124995/6165/3376/79590/6210/6227/8892/10573/6158/7458/6228/6189/6747/6147/6182/51520/740/6230/28972/6224/6301/6173/6229/7284/6125/6231/6730/6144/6232/25873/9789/6187/80222/6154/6731/6191/8663/219402/6122/8890/6155/8668/51069/6188/6156/6130/…
R-HSA-72689	Formation of a pool of free 40S subunits	98	-0.643073	-2.84289	1.25547e-17	5.49057e-15	4.44919e-15	2720	tags=87%, list=30%, signal=61%	6160/6201/6203/9349/3921/6169/6208/6152/6143/6141/6157/6133/6206/6235/6134/8667/3646/6204/51121/6165/6210/6227/6158/6228/6189/6147/6230/6224/6173/6229/6125/6231/6144/6232/25873/6187/6154/6191/8663/6122/6155/8668/6188/6156/6130/6170/6159/8662/6192/6223/8666/6217/2197/11224/6135/6139/6193/6233/9045/10480/6171/6176/6175/6194/6142/6161/8665/6128/6136/6218/6209/51386/6137/6181/7311/6205/6138/6202/4736…
R-HSA-72613	Eukaryotic Translation Initiation	115	-0.607037	-2.75218	2.62743e-17	6.89438e-15	5.58675e-15	2720	tags=83%, list=30%, signal=59%	8893/6234/6160/6201/6203/9349/3921/6169/6208/6152/6143/6141/6157/6133/6206/6235/6134/8667/3646/6204/51121/6165/6210/6227/8892/6158/7458/6228/6189/6147/6230/6224/6173/6229/6125/6231/6144/6232/25873/6187/6154/6191/8663/6122/8890/6155/8668/6188/6156/6130/6170/6159/8662/6192/6223/8666/6217/1978/2197/11224/6135/6139/6193/6233/9045/10480/1967/6171/6176/6175/6194/26986/6142/6161/1981/8665/6128/6136/6218…
R-HSA-72737	Cap-dependent Translation Initiation	115	-0.607037	-2.75218	2.62743e-17	6.89438e-15	5.58675e-15	2720	tags=83%, list=30%, signal=59%	8893/6234/6160/6201/6203/9349/3921/6169/6208/6152/6143/6141/6157/6133/6206/6235/6134/8667/3646/6204/51121/6165/6210/6227/8892/6158/7458/6228/6189/6147/6230/6224/6173/6229/6125/6231/6144/6232/25873/6187/6154/6191/8663/6122/8890/6155/8668/6188/6156/6130/6170/6159/8662/6192/6223/8666/6217/1978/2197/11224/6135/6139/6193/6233/9045/10480/1967/6171/6176/6175/6194/26986/6142/6161/1981/8665/6128/6136/6218…
R-HSA-156842	Eukaryotic Translation Elongation	89	-0.658036	-2.85446	4.40718e-17	9.63703e-15	7.80921e-15	2771	tags=89%, list=31%, signal=62%	6160/6201/6203/9349/3921/6169/6208/6152/6143/6141/6157/6133/6206/6235/6134/6204/51121/6165/6210/6227/6158/6228/6189/6147/6230/6224/6173/6229/6125/6231/6144/6232/25873/6187/6154/6191/6122/6155/6188/6156/6130/6170/6159/6192/6223/6217/2197/11224/1937/6135/6139/6193/6233/9045/6171/6176/6175/1933/6194/1915/6142/6161/6128/6136/6218/6209/6137/6181/7311/6205/6138/6202/4736/23521/6222/6124/1938/6168/6132
R-HSA-156902	Peptide chain elongation	86	-0.659556	-2.83935	1.57983e-16	2.30304e-14	1.86623e-14	2771	tags=90%, list=31%, signal=63%	6160/6201/6203/9349/3921/6169/6208/6152/6143/6141/6157/6133/6206/6235/6134/6204/51121/6165/6210/6227/6158/6228/6189/6147/6230/6224/6173/6229/6125/6231/6144/6232/25873/6187/6154/6191/6122/6155/6188/6156/6130/6170/6159/6192/6223/6217/2197/11224/6135/6139/6193/6233/9045/6171/6176/6175/6194/1915/6142/6161/6128/6136/6218/6209/6137/6181/7311/6205/6138/6202/4736/23521/6222/6124/1938/6168/6132
R-HSA-156827	L13a-mediated translational silencing of Ceruloplasmin expression	108	-0.613654	-2.76187	1.44176e-16	2.30304e-14	1.86623e-14	2720	tags=81%, list=30%, signal=58%	6201/6203/9349/3921/6169/6208/6152/6143/6141/6157/6133/6206/6235/6134/8667/3646/6204/51121/6165/6210/6227/6158/7458/6228/6189/6147/6230/6224/6173/6229/6125/6231/6144/6232/25873/6187/6154/6191/8663/6122/6155/8668/6188/6156/6130/6170/6159/8662/6192/6223/8666/6217/2197/11224/6135/6139/6193/6233/9045/10480/6171/6176/6175/6194/26986/6142/6161/1981/8665/6128/6136/6218/1975/6209/51386/6137/6181/7311/620…
R-HSA-1799339	SRP-dependent cotranslational protein targeting to membrane	109	-0.609478	-2.75039	1.51082e-16	2.30304e-14	1.86623e-14	2720	tags=78%, list=30%, signal=55%	6201/6203/9349/3921/6169/55176/6208/6152/6143/6141/6157/6133/6206/6235/6134/6204/51121/23478/6165/6210/6227/6158/6228/6189/6747/6147/6230/28972/6224/6173/6229/6125/6231/6730/6144/6232/25873/9789/6187/6154/6731/6191/6122/6155/6188/6156/6130/6170/6159/6192/6223/6217/6734/6185/2197/11224/6135/6139/6193/6233/9045/6748/6171/6176/6175/6194/6142/6161/6128/6136/6218/6209/6137/6181/7311/6184/6205/6138/620…
R-HSA-72706	GTP hydrolysis and joining of the 60S ribosomal subunit	109	-0.605881	-2.73416	3.09439e-16	4.05984e-14	3.28983e-14	2720	tags=80%, list=30%, signal=57%	6201/6203/9349/3921/6169/6208/6152/6143/6141/6157/6133/6206/6235/6134/8667/3646/6204/51121/6165/6210/6227/6158/7458/6228/6189/6147/6230/6224/6173/6229/6125/6231/6144/6232/25873/6187/6154/6191/8663/6122/6155/8668/6188/6156/6130/6170/6159/8662/6192/6223/8666/6217/2197/11224/6135/6139/6193/6233/9045/10480/6171/6176/6175/6194/6142/6161/1981/8665/6128/6136/6218/1975/6209/51386/6137/6181/7311/6205/6138…
R-HSA-975956	Nonsense Mediated Decay (NMD) independent of the Exon Junction Complex (EJC)	91	-0.634438	-2.75586	3.76849e-16	4.49478e-14	3.64227e-14	2771	tags=86%, list=31%, signal=60%	6160/6201/6203/9349/3921/6169/6208/6152/6143/6141/6157/6133/6206/6235/6134/6204/51121/6165/6210/6227/6158/6228/6189/6147/6230/6224/6173/6229/6125/6231/6144/6232/25873/6187/6154/6191/6122/6155/6188/6156/6130/6170/6159/6192/6223/6217/2197/11224/6135/6139/6193/6233/9045/6171/6176/6175/6194/26986/6142/6161/1981/6128/6136/6218/6209/6137/6181/7311/6205/6138/6202/4736/23521/5976/6222/6124/6168/6132
R-HSA-192823	Viral mRNA Translation	86	-0.652385	-2.80848	7.93257e-16	8.67294e-14	7.02798e-14	2771	tags=87%, list=31%, signal=61%	6160/6201/6203/9349/3921/6169/6208/6152/6143/6141/6157/6133/6206/6235/6134/6204/51121/6165/6210/6227/6158/6228/6189/6147/6230/6224/6173/6229/6125/6231/6144/6232/25873/6187/6154/6191/6122/6155/6188/6156/6130/6170/6159/6192/6223/6217/2197/11224/6135/6139/6193/6233/9045/6171/6176/6175/6194/6142/6161/6128/6136/6218/6209/6137/6181/7311/6205/6138/6202/4736/23521/6222/6124/6168/6132
R-HSA-2408557	Selenocysteine synthesis	87	-0.632436	-2.72727	1.47963e-15	1.49329e-13	1.21006e-13	2771	tags=87%, list=31%, signal=61%	6160/6201/6203/9349/3921/6169/6208/6152/6143/6141/6157/6133/6206/6235/6134/6204/51121/6165/6210/6227/6158/6228/6189/6147/6230/6224/6301/6173/6229/6125/6231/6144/6232/25873/6187/6154/6191/6122/6155/6188/6156/6130/6170/6159/6192/6223/6217/2197/11224/6135/6139/6193/6233/9045/6171/6176/6175/6194/6142/6161/6128/6136/6218/6209/6137/6181/7311/6205/6138/6202/4736/23521/6222/6124/6168/6132
R-HSA-9633012	Response of EIF2AK4 (GCN2) to amino acid deficiency	96	-0.612549	-2.70448	3.46339e-15	3.24569e-13	2.63009e-13	2774	tags=82%, list=31%, signal=58%	57761/6160/6201/6203/9349/3921/6169/6208/6152/6143/6141/6157/6133/6206/6235/6134/6204/51121/6165/6210/6227/6158/6228/6189/6147/6230/6224/6173/440/6229/6125/6231/6144/6232/25873/6187/6154/6191/6122/6155/6188/6156/6130/6170/6159/6192/6223/6217/2197/11224/6135/6139/6193/6233/9045/6171/6176/6175/6194/6142/6161/1051/6128/6136/6218/6209/6137/10985/6181/7311/6205/6138/6202/4736/23521/6222/6124/6168/6132
R-HSA-6791226	Major pathway of rRNA processing in the nucleolus and cytosol	142	-0.544256	-2.56674	5.53132e-15	4.83806e-13	3.92045e-13	2866	tags=69%, list=32%, signal=48%	51388/6234/114049/6160/88745/6201/6203/9349/3921/6169/6208/6152/6143/6141/2091/6157/6133/6206/6235/6134/79050/6204/51121/6165/6210/6227/6158/6228/6189/6147/10607/6230/6224/5394/6173/6229/10200/117246/6125/6231/6144/6232/25873/6187/6154/6191/6122/23246/6155/23160/6188/6156/6130/6170/6159/6192/6223/6217/2197/11224/4691/6135/25926/6139/57418/6193/6233/9045/92856/4809/6171/6176/6175/27043/6194/6142/6…
R-HSA-72764	Eukaryotic Translation Termination	88	-0.625355	-2.70268	6.57173e-15	5.38882e-13	4.36674e-13	2771	tags=85%, list=31%, signal=60%	6160/6201/6203/9349/3921/6169/6208/6152/6143/6141/6157/6133/6206/6235/6134/6204/51121/6165/6210/6227/6158/6228/6189/6147/6230/6224/6173/6229/6125/6231/6144/6232/25873/6187/6154/6191/6122/6155/6188/6156/6130/6170/6159/6192/6223/6217/2197/11224/6135/6139/6193/6233/9045/6171/6176/6175/6194/6142/6161/6128/6136/6218/6209/6137/6181/7311/6205/6138/6202/4736/23521/6222/6124/6168/6132
R-HSA-2408522	Selenoamino acid metabolism	105	-0.597869	-2.68139	9.66191e-15	7.45672e-13	6.04243e-13	2720	tags=78%, list=30%, signal=55%	6160/6201/6203/9349/3921/6169/6208/6152/6143/6141/6157/6133/6206/6235/6134/6204/51121/6165/3376/6210/6227/6158/6228/6189/6147/51520/6230/6224/6301/6173/6229/2936/6125/6231/6144/6232/25873/6187/6154/6191/6122/6155/6188/6156/6130/6170/6159/6192/6223/6217/2058/2197/11224/6135/6139/6193/6233/9045/6171/6176/6175/6194/5859/6142/6161/6128/6136/6218/6209/6137/9061/6181/7311/6205/6138/6202/4736/23521/6222…
R-HSA-8868773	rRNA processing in the nucleus and cytosol	150	-0.533327	-2.52419	1.39426e-14	1.01626e-12	8.23508e-13	2883	tags=67%, list=32%, signal=47%	55226/51388/6234/114049/6160/88745/6201/6203/9349/3921/6169/6208/6152/6143/55651/6141/2091/6157/6133/6206/6235/6134/79050/6204/51121/6165/6210/6227/6158/6228/6189/6147/10607/6230/6224/5394/6173/6229/10200/117246/6125/6231/6144/6232/25873/6187/6154/6191/6122/55623/23246/6155/23160/6188/6156/6130/6170/6159/6192/6223/6217/2197/11224/4691/6135/25926/6139/57418/6193/6233/9045/92856/4809/6171/6176/6175…
R-HSA-72312	rRNA processing	155	-0.526018	-2.50313	1.69611e-14	1.17121e-12	9.49071e-13	2883	tags=67%, list=32%, signal=47%	55226/51388/6234/114049/6160/60528/387338/88745/6201/6203/9349/3921/6169/6208/6152/6143/55651/6141/2091/6157/6133/6206/6235/6134/79050/6204/51121/6165/6210/6227/6158/6228/6189/6147/3028/10607/6230/6224/5394/6173/6229/10200/117246/6125/6231/6144/6232/25873/6187/6154/6191/6122/55623/23246/6155/23160/6188/6156/6130/6170/6159/6192/6223/6217/2197/11224/4691/6135/25926/6139/57418/6193/6233/9045/92856/4…
R-HSA-422475	Axon guidance	327	-0.416727	-2.18692	4.22689e-14	2.77284e-12	2.24693e-12	2720	tags=52%, list=30%, signal=38%	6201/5693/55558/6203/9349/5701/3921/6169/7846/7074/6208/6152/6143/55740/1460/6141/6157/5700/6237/7979/51466/288/5361/6133/8861/6206/6235/5364/6134/9855/4637/11313/5747/2064/1808/5621/3326/2041/6204/7280/3688/51121/6165/1785/6210/7430/6654/6709/5296/6227/5692/5217/6158/60/6228/6189/5664/6147/79784/5062/6230/8828/6224/7094/1759/23396/6173/5719/6229/1298/10487/1969/6453/776/6125/6231/4478/6712/6144/…
R-HSA-168273	Influenza Viral RNA Transcription and Replication	125	-0.556844	-2.56139	6.37785e-14	3.98464e-12	3.22888e-12	2720	tags=71%, list=30%, signal=51%	6201/6203/9349/5439/3921/6169/81929/6208/6152/6143/4927/6141/6157/6133/6206/6235/6134/6204/51121/6165/6210/6227/6158/6228/6189/6147/23511/6230/6224/2962/6173/6229/6125/6231/6144/6232/5438/25873/6187/6154/23165/6191/6122/6155/6188/6156/6130/6170/6159/6192/6223/6217/2197/9883/11224/6135/5441/6139/23225/6193/6233/142/9045/6171/6176/6175/6194/6142/9688/6161/6128/6136/6218/6209/6137/8021/6181/7311/620…
R-HSA-9010553	Regulation of expression of SLITs and ROBOs	139	-0.526173	-2.4673	2.68132e-13	1.59904e-11	1.29576e-11	2783	tags=66%, list=31%, signal=47%	5688/6160/6201/5693/6203/9349/5701/3921/6169/6208/6152/6143/6141/6157/5700/7979/6133/8861/6206/6235/6134/6204/51121/6165/6210/6227/5692/6158/6228/6189/6147/6230/6224/6173/5719/6229/6125/6231/6144/6232/25873/6187/6154/6191/6122/6155/6188/6156/6130/6170/6159/6192/6223/6923/6217/2197/11224/6135/10921/6139/6193/5709/6233/7314/9045/6171/6176/6175/5714/6194/26986/6142/6161/1981/6128/6136/6218/6209/6137…
R-HSA-376176	Signaling by ROBO receptors	166	-0.504689	-2.42741	3.0801e-13	1.75699e-11	1.42375e-11	2783	tags=62%, list=31%, signal=44%	5688/6160/6201/5693/6203/9349/5701/3921/6169/6208/6152/6143/55740/6141/6157/5700/7979/51466/6133/8861/6206/6235/6134/6204/51121/6165/6210/6654/6227/5692/5217/6158/6228/6189/6147/5062/6230/6224/6173/5719/6229/10487/6125/6231/6144/6232/25873/6187/6154/6191/5576/6122/6155/6188/6156/6130/6170/6159/6192/6223/6923/6217/2197/11224/6135/10921/6139/6193/5709/6233/7314/9045/6171/6176/6175/5714/6194/26986/6…
R-HSA-9675108	Nervous system development	339	-0.404716	-2.13084	3.84964e-13	2.10447e-11	1.70532e-11	2720	tags=51%, list=30%, signal=37%	6201/5693/55558/6203/9349/5701/3921/6169/7846/7074/84059/6208/6152/6143/55740/1460/6141/6157/5700/6237/7979/51466/288/5361/6133/8861/6206/6235/5364/6134/9855/4637/11313/5747/2064/1808/5621/3326/2041/6204/7280/3688/51121/6165/1785/6210/7430/6654/6709/5296/6227/5692/5217/6158/60/6228/6189/5664/6147/79784/5062/6230/8828/6224/7094/1759/23396/6173/5719/6229/1298/10487/1969/6453/776/6125/6231/4478/6712…
R-HSA-927802	Nonsense-Mediated Decay (NMD)	108	-0.56919	-2.56175	4.94281e-13	2.49422e-11	2.02115e-11	2720	tags=75%, list=30%, signal=53%	6201/6203/9349/3921/6169/6208/6152/6143/6141/6157/6133/6206/6235/6134/6204/51121/6165/6210/6227/55629/6158/6228/6189/6147/6230/6224/6173/6229/6125/6231/6144/6232/23381/25873/6187/6154/6191/5518/6122/6155/6188/6156/6130/6170/6159/6192/6223/6217/2197/11224/6135/10921/6139/6193/6233/9045/6171/6176/6175/6194/26986/6142/6161/1981/6128/6136/6218/6209/6137/6181/7311/6205/6138/6202/4736/23521/5976/6222/6…
R-HSA-975957	Nonsense Mediated Decay (NMD) enhanced by the Exon Junction Complex (EJC)	108	-0.56919	-2.56175	4.94281e-13	2.49422e-11	2.02115e-11	2720	tags=75%, list=30%, signal=53%	6201/6203/9349/3921/6169/6208/6152/6143/6141/6157/6133/6206/6235/6134/6204/51121/6165/6210/6227/55629/6158/6228/6189/6147/6230/6224/6173/6229/6125/6231/6144/6232/23381/25873/6187/6154/6191/5518/6122/6155/6188/6156/6130/6170/6159/6192/6223/6217/2197/11224/6135/10921/6139/6193/6233/9045/6171/6176/6175/6194/26986/6142/6161/1981/6128/6136/6218/6209/6137/6181/7311/6205/6138/6202/4736/23521/5976/6222/6…
R-HSA-168255	Influenza Infection	143	-0.500154	-2.36629	7.52489e-12	3.65654e-10	2.96302e-10	2720	tags=66%, list=30%, signal=47%	6201/6203/9349/5439/3921/6169/5901/81929/6208/6152/6143/4927/6141/6157/6133/6206/6235/6134/821/6204/51121/6165/6210/6227/6158/6228/6189/6147/23511/6230/6224/2962/6173/6229/6125/6231/6144/6232/5438/25873/6187/6154/23165/6191/6122/6155/1211/6188/6156/6130/6170/6159/6192/6223/6217/811/2197/9883/11224/6135/5441/6139/23225/6193/6233/142/9045/6171/6176/6175/6194/6142/9688/6161/6128/6136/6218/6209/6137/…
R-HSA-1280215	Cytokine Signaling in Immune system	550	0.329469	1.85591	1.69626e-11	7.94821e-10	6.4407e-10	1760	tags=31%, list=19%, signal=27%	64135/7324/6775/84166/24138/5610/91543/23586/4940/4067/1440/3434/3656/3437/3433/4792/3660/3659/3383/330/9636/51191/29110/4599/3669/2633/3557/6348/329/6351/2635/3587/3627/8672/3134/1234/10561/54739/23118/10379/10964/3586/6772/92610/115362/11213/8877/11274/6352/10018/4600/5290/115361/10410/4790/6809/3559/3717/567/5903/4791/9683/5782/5908/7187/8740/3665/2634/1326/4939/3091/3551/7409/317649/5971/3883…
R-HSA-909733	Interferon alpha/beta signaling	61	0.623086	2.60989	1.16277e-10	5.26051e-09	4.26277e-09	1367	tags=54%, list=15%, signal=46%	24138/5610/91543/4940/3434/3437/3433/3660/3659/9636/4599/3669/3134/54739/10379/6772/11274/4600/10410/3665/2634/4939/51447/8519/5781/5696/6773/3455/4938/103/3133/8651/3662
R-HSA-392499	Metabolism of proteins	1339	-0.266947	-1.55493	6.9672e-10	3.04699e-08	2.46908e-08	2196	tags=31%, list=24%, signal=28%	55827/3098/84545/8667/64924/4722/4286/7157/8312/10445/80176/100128731/64426/808/8295/3646/51650/821/6204/57695/9526/165918/123169/1368/7280/11167/10980/51121/23478/58485/1512/3014/10197/124995/6165/3376/115209/10869/79590/60412/6210/8968/6709/5202/7184/86/200958/4719/6934/6227/91689/5692/1329/554313/8892/2271/6881/10573/10574/6158/60/7458/375/3065/27034/6228/4582/56995/6189/3313/6256/6747/5886/61…
R-HSA-1474244	Extracellular matrix organization	111	-0.499712	-2.25011	5.34351e-09	2.26151e-07	1.83258e-07	1754	tags=42%, list=19%, signal=35%	824/999/3913/64175/1298/10491/8425/3385/3691/5479/9672/871/1508/23385/4054/3695/3675/780/3911/6641/1514/59/6385/26577/8751/84034/8985/3339/7077/3689/825/4327/5175/823/682/87/5351/1509/6650/826/79709/71/3693/3683/2335/667/977
R-HSA-913531	Interferon Signaling	204	0.393212	2.01145	1.47383e-08	6.04271e-07	4.89662e-07	1500	tags=33%, list=17%, signal=28%	64135/7324/24138/5610/91543/23586/4940/3434/3437/3433/3660/3659/3383/9636/51191/4599/3669/2633/2635/8672/3134/10561/54739/10379/10964/6772/115362/8877/11274/4600/115361/10410/3717/567/5903/3665/2634/4939/3551/317649/10475/6737/6672/51447/8519/6774/5781/10346/1974/8554/5696/53371/6773/3455/85363/4938/23279/3460/103/5771/3133/8651/5894/3662/5371/5608/8894/3716
R-HSA-1266738	Developmental Biology	715	-0.291967	-1.64005	1.9775e-08	7.86205e-07	6.37089e-07	2481	tags=37%, list=27%, signal=29%	55740/4849/1460/6141/1475/6157/5700/6237/7979/7290/527/4174/51466/288/5361/5493/7528/6133/8861/6206/6235/5364/6134/4609/892/168544/9855/4637/11313/5747/2064/1808/5621/3326/80205/3169/7531/4286/7157/10406/2041/6204/7280/3688/51121/3014/6165/3376/1785/55766/3853/6210/10025/7430/6654/8968/6709/5296/86/6934/6227/6688/5692/5217/554313/6158/60/3065/6228/6189/5664/6256/6147/79784/3860/3725/51520/5062/62…
R-HSA-71291	Metabolism of amino acids and derivatives	221	-0.38727	-1.95282	3.3099e-08	1.27723e-06	1.03498e-06	2106	tags=44%, list=23%, signal=35%	6204/85007/51121/6165/3376/100131187/6210/29920/6227/5692/2639/6158/27034/6228/6189/6147/3028/51520/6230/6224/6301/6173/440/5719/6229/2936/6125/6231/6144/6232/25873/6187/6154/6191/6122/6155/2184/125061/6188/6156/6130/347735/6170/6159/6192/6223/55256/223/6217/2746/2058/2197/11224/6135/6723/4357/6139/6193/5709/6233/9045/3712/6171/6176/6175/53905/4552/5714/9673/6194/5859/6142/6161/4946/6128/6136/621…
R-HSA-9837999	Mitochondrial protein degradation	76	-0.54596	-2.29844	5.01137e-08	1.82637e-06	1.47997e-06	2029	tags=53%, list=22%, signal=41%	115209/4719/91689/1329/2271/27034/3313/3028/6182/1632/4723/5160/1891/4712/506/292/50/4513/2746/9361/6687/51079/5096/4540/498/1431/4191/55699/1327/4967/4695/211/4536/4535/4541/5566/217/293/4508/4512
R-HSA-168256	Immune System	1389	0.239428	1.45112	4.87236e-08	1.82637e-06	1.47997e-06	1768	tags=26%, list=19%, signal=24%	64135/7324/6775/84166/24138/57823/5610/7130/7128/55860/91543/26253/23586/4940/4067/27071/1440/3434/3656/9554/64167/3437/3433/4792/3660/3659/10578/3383/330/9636/118788/51191/29110/4599/3669/255488/10385/2633/5527/3557/80231/6348/329/3428/10533/6351/2635/5266/3587/3627/837/8672/29126/3134/1234/253260/10561/10802/830/54739/23118/10379/163/10964/3586/55008/55294/6890/10010/6772/92610/26118/115362/798…
R-HSA-72662	Activation of the mRNA upon binding of the cap-binding complex and eIFs, and subsequent binding to 43S	59	-0.57689	-2.30408	5.21347e-08	1.84867e-06	1.49804e-06	2311	tags=71%, list=25%, signal=53%	6206/6235/8667/3646/6204/6210/6227/7458/6228/6189/6230/6224/6229/6231/6232/6187/6191/8663/8668/6188/8662/6192/6223/8666/6217/1978/2197/6193/6233/10480/6194/26986/1981/8665/6218/1975/6209/51386/6205/6202/6222/27335
R-HSA-9735869	SARS-CoV-1 modulates host translation machinery	36	-0.660421	-2.36841	8.93248e-08	3.08406e-06	2.49911e-06	2832	tags=94%, list=31%, signal=65%	6234/6201/6203/3921/6208/6206/6235/6204/6210/6227/6228/6189/6230/6224/6229/6231/6232/6187/6191/6188/6192/6223/6217/2197/3178/6193/6233/6194/1915/6218/6209/6205/6202/6222
R-HSA-72649	Translation initiation complex formation	58	-0.573341	-2.27534	1.19888e-07	4.03315e-06	3.2682e-06	2311	tags=71%, list=25%, signal=53%	6206/6235/8667/3646/6204/6210/6227/7458/6228/6189/6230/6224/6229/6231/6232/6187/6191/8663/8668/6188/8662/6192/6223/8666/6217/2197/6193/6233/10480/6194/26986/1981/8665/6218/1975/6209/51386/6205/6202/6222/27335
R-HSA-72695	Formation of the ternary complex, and subsequently, the 43S complex	51	-0.590912	-2.29213	2.91208e-07	9.55164e-06	7.74001e-06	2720	tags=90%, list=30%, signal=64%	6207/1968/8661/8664/6234/6201/6203/3921/6208/6206/6235/8667/3646/6204/6210/6227/6228/6189/6230/6224/6229/6231/6232/6187/6191/8663/8668/6188/8662/6192/6223/8666/6217/2197/6193/6233/10480/6194/8665/6218/6209/51386/6205/6202/6222/27335
R-HSA-72702	Ribosomal scanning and start codon recognition	58	-0.558304	-2.21566	4.46166e-07	1.42773e-05	1.15694e-05	2311	tags=69%, list=25%, signal=52%	6206/6235/8667/3646/6204/6210/6227/7458/6228/6189/6230/6224/6229/6231/6232/6187/6191/8663/8668/6188/8662/6192/6223/8666/6217/2197/6193/6233/10480/6194/1981/8665/6218/1975/6209/51386/6205/6202/6222/27335
R-HSA-9711097	Cellular response to starvation	135	-0.41737	-1.94906	5.43376e-07	1.6974e-05	1.37546e-05	2832	tags=66%, list=31%, signal=46%	6234/57521/57761/6160/6201/6203/9349/3921/6169/81929/6208/6152/6143/6141/6157/527/6133/6206/6235/389541/6134/55004/6204/51121/6165/9681/6210/54468/6227/6158/6228/6189/6147/6230/6224/6173/440/6229/6125/6231/6144/6232/25873/6187/6154/6191/10312/6122/6155/6188/6156/6130/6170/6159/6192/6223/6217/2197/11224/6135/6139/6193/6233/9045/6171/6176/6175/6194/6142/6161/1051/6128/6136/6218/6209/6137/10985/6181…
R-HSA-168928	DDX58/IFIH1-mediated induction of interferon-alpha/beta	61	0.535065	2.2412	6.37488e-07	1.94508e-05	1.57616e-05	1204	tags=39%, list=13%, signal=34%	64135/84166/7128/23586/4792/9636/51191/29110/10010/79132/4790/1540/4791/7187/3665/3551/7323/843/5970/89122/6288/55593/80143/7321
R-HSA-1428517	Aerobic respiration and respiratory electron transport	186	-0.392215	-1.9265	7.40217e-07	2.20719e-05	1.78856e-05	2057	tags=37%, list=23%, signal=29%	57128/25852/10975/4719/4715/64777/1329/2271/7388/4725/1340/3313/2108/4723/1337/4726/8802/5160/126328/513/1350/4708/4712/84833/506/50/10131/7351/4513/5315/6834/518/4713/516/84987/6233/4706/7314/9054/84300/51079/4540/498/1431/4191/4537/4696/29796/1327/4967/4519/4716/28976/374291/4718/4695/7311/4536/4535/4541/6389/4508/4512/4538/2109/4714/4514/7384/8402
R-HSA-6783783	Interleukin-10 signaling	41	0.605779	2.35005	8.54353e-07	2.49091e-05	2.01847e-05	2786	tags=76%, list=31%, signal=53%	1440/3383/3557/6348/6351/3587/3627/1234/3586/6352/388372/414062/6349/6774/2919/3569/3716/6364/7133/7124/5743/3576/3553/3554/3606/1230/941/6347/3588/729230/5724
R-HSA-500792	GPCR ligand binding	88	0.476854	2.16067	1.3941e-06	3.97623e-05	3.22207e-05	1909	tags=47%, list=21%, signal=37%	54331/6348/1236/6351/3627/9034/1234/6352/1906/59345/5031/388372/135/2015/8643/1880/414062/6349/1604/2867/8843/2790/1889/2865/718/2359/6373/6288/1240/2782/8477/2919/338442/7852/5732/6364/4283/3576/2358/57486/29933
R-HSA-611105	Respiratory electron transport	121	-0.427308	-1.95585	2.70244e-06	7.54383e-05	6.11302e-05	2167	tags=42%, list=24%, signal=33%	4722/4710/57128/10975/4719/4715/1329/7388/4725/1340/3313/2108/4723/1337/4726/126328/1350/4708/4712/10131/4513/6834/4713/84987/4706/9054/84300/51079/4540/4191/4537/4696/29796/1327/4519/4716/28976/374291/4718/4695/4536/4535/4541/6389/4512/4538/2109/4714/4514/7384/8402
R-HSA-373076	Class A/1 (Rhodopsin-like receptors)	72	0.485421	2.10272	2.83541e-06	7.75013e-05	6.28019e-05	1909	tags=47%, list=21%, signal=38%	6348/1236/6351/3627/9034/1234/6352/1906/5031/388372/135/1880/414062/6349/2867/8843/1889/2865/718/2359/6373/6288/1240/8477/2919/338442/7852/5732/6364/4283/3576/2358/57486/29933
R-HSA-9754678	SARS-CoV-2 modulates host translation machinery	45	-0.57986	-2.16369	4.0408e-06	0.000108194	8.76736e-05	2832	tags=80%, list=31%, signal=55%	6234/6201/6203/3921/6208/6206/6235/6204/6633/6210/6227/6607/6606/6228/6189/6230/6224/6229/6231/6232/6187/6191/79760/6188/6192/6223/6217/2197/6193/6233/6194/6218/6209/6205/6202/6222
R-HSA-166166	MyD88-independent TLR4 cascade	93	0.438194	1.99422	6.53659e-06	0.000168157	0.000136263	1807	tags=41%, list=20%, signal=33%	84166/3656/4792/330/29110/329/23118/10010/92610/11274/4790/4791/9683/7187/3665/1326/3551/23643/7323/148022/5781/5970/10133/6288/8454/5606/7321/64127/9261/4205/1432/51231/5608/2353/7186/2002/79155/1385
R-HSA-937061	TRIF (TICAM1)-mediated TLR4 signaling	93	0.438194	1.99422	6.53659e-06	0.000168157	0.000136263	1807	tags=41%, list=20%, signal=33%	84166/3656/4792/330/29110/329/23118/10010/92610/11274/4790/4791/9683/7187/3665/1326/3551/23643/7323/148022/5781/5970/10133/6288/8454/5606/7321/64127/9261/4205/1432/51231/5608/2353/7186/2002/79155/1385
R-HSA-71387	Metabolism of carbohydrates and carbohydrate derivatives	165	-0.380932	-1.83105	8.28257e-06	0.000208976	0.00016934	1838	tags=34%, list=20%, signal=28%	5210/23511/2821/6888/10327/3423/5837/138050/9394/9672/5256/2525/23165/5631/9653/5518/221914/2597/93010/2990/5226/9883/5315/216/4669/6385/23225/6233/7314/5211/9688/3339/3425/4125/231/3074/25796/23324/11261/6548/92579/6652/9061/8021/11285/2023/7311/5566/226/2539/10057/7086/30815/4123/2548/2203
R-HSA-1474290	Collagen formation	24	-0.673776	-2.19423	1.0342e-05	0.000256014	0.000207457	1673	tags=58%, list=18%, signal=48%	64175/1298/10491/3691/5479/871/1508/1514/26577/8985/5351/79709/667/977
R-HSA-375276	Peptide ligand-binding receptors	46	0.548527	2.18154	1.53704e-05	0.000373444	0.000302614	1896	tags=50%, list=21%, signal=40%	6348/1236/6351/3627/9034/1234/6352/1906/388372/414062/6349/1889/718/2359/6373/6288/2919/7852/6364/4283/3576/2358/57486
R-HSA-6806667	Metabolism of fat-soluble vitamins	21	-0.679289	-2.14378	1.63132e-05	0.000389144	0.000315336	1506	tags=62%, list=17%, signal=52%	9672/221914/344/1645/4023/79001/6385/54884/3339/51109/348/5950/4035
R-HSA-163560	Triglyceride catabolism	10	-0.84365	-2.17169	2.13682e-05	0.000500626	0.000405674	618	tags=50%, list=7%, signal=47%	51099/5499/5566/2171/2167
R-HSA-168164	Toll Like Receptor 3 (TLR3) Cascade	89	0.433222	1.96585	2.82401e-05	0.000650017	0.000526731	1807	tags=40%, list=20%, signal=33%	84166/3656/4792/330/29110/329/23118/10010/92610/11274/4790/4791/9683/7187/3665/1326/3551/7323/148022/5970/10133/6288/8454/5606/7321/64127/9261/4205/1432/51231/5608/2353/7186/2002/79155/1385
R-HSA-211859	Biological oxidations	73	-0.467897	-1.95633	3.30175e-05	0.000746878	0.00060522	1954	tags=40%, list=22%, signal=31%	6817/8574/55902/4144/6256/9049/95/10327/7358/8824/216/4259/4552/2052/64174/1580/1545/2950/1312/9061/55748/217/1727/1572/1593/1555/1066/2937/8639
R-HSA-168898	Toll-like Receptor Cascades	134	0.373126	1.80259	4.77503e-05	0.00106184	0.000860443	1483	tags=31%, list=16%, signal=27%	84166/3656/4792/330/29110/80231/329/23118/10010/92610/11213/11274/4790/4791/9683/7187/3665/1326/3551/23643/7323/148022/5781/121260/5970/57162/10133/6288/7097/1687/8454/5606/7321/64145/64127/8651/9261/4205/51311/1432/51231/5608
R-HSA-1474228	Degradation of the extracellular matrix	43	-0.548366	-2.03822	5.24451e-05	0.0011468	0.000929291	1754	tags=42%, list=19%, signal=34%	824/999/1298/1508/23385/3911/1514/8751/3339/7077/825/4327/823/682/1509/6650/826/2335
R-HSA-166016	Toll Like Receptor 4 (TLR4) Cascade	117	0.387584	1.84257	6.36194e-05	0.00136834	0.00110881	1807	tags=36%, list=20%, signal=29%	84166/3656/4792/330/29110/329/23118/10010/92610/11213/11274/4790/4791/9683/7187/3665/1326/3551/23643/7323/148022/5781/5970/57162/10133/6288/7097/8454/5606/7321/64127/8651/9261/4205/1432/51231/5608/2353/7186/2002/79155/1385
R-HSA-9909505	Modulation of host responses by IFN-stimulated genes	19	0.67954	2.13824	7.76116e-05	0.00164236	0.00133086	517	tags=37%, list=6%, signal=35%	64135/23586/9636/51191/10561/10964/3551
R-HSA-877300	Interferon gamma signaling	74	0.432373	1.88183	9.19229e-05	0.00191433	0.00155125	2025	tags=53%, list=22%, signal=41%	4940/3660/3659/3383/2633/2635/3134/10379/6772/115362/115361/3717/567/3665/2634/4939/10475/6737/6672/5781/10346/8554/85363/4938/3460/5771/3133/8651/5894/3662/5371/3716/3459/7726/8638/4502/3118/7706/7341
R-HSA-5218859	Regulated Necrosis	54	0.487642	1.99502	0.000100504	0.00206033	0.00166955	1064	tags=33%, list=12%, signal=30%	25978/355/3002/838/3660/3659/330/329/8837/837/8743/6386/128866/57162/10211/834/51652/1687
R-HSA-975634	Retinoid metabolism and transport	20	-0.670345	-2.1018	0.000122153	0.00246562	0.00199797	1506	tags=60%, list=17%, signal=50%	9672/221914/344/1645/4023/6385/54884/3339/51109/348/5950/4035
R-HSA-5668914	Diseases of metabolism	122	-0.389198	-1.78275	0.000152773	0.00303694	0.00246094	1705	tags=34%, list=19%, signal=28%	6888/95/1798/3423/138050/55788/4851/9672/221914/2990/94025/4585/4669/727897/353/6385/6233/7314/5826/3712/3417/31/4552/29954/3955/3339/3425/5096/3074/1545/92579/7841/10417/5476/11285/7311/10195/326625/1593/2937/55624/2548
R-HSA-174824	Plasma lipoprotein assembly, remodeling, and clearance	42	-0.522524	-1.94232	0.000164227	0.0032159	0.00260595	1267	tags=40%, list=14%, signal=35%	1211/344/4023/3069/6233/7314/160/7311/57552/5566/1175/9619/949/348/341/1173/29801
R-HSA-190828	Gap junction trafficking	18	-0.673141	-2.02304	0.000180786	0.00348812	0.00282654	2083	tags=78%, list=23%, signal=60%	7280/1785/60/1759/1601/84617/10383/1211/84790/1212/10376/4646/1173/71
R-HSA-380108	Chemokine receptors bind chemokines	28	0.592112	2.08498	0.000199935	0.00377211	0.00305667	1847	tags=57%, list=20%, signal=46%	6348/1236/6351/3627/9034/1234/6352/388372/414062/6349/6373/2919/7852/6364/4283/3576
R-HSA-933542	TRAF6 mediated NF-kB activation	21	0.62768	2.02929	0.000201256	0.00377211	0.00305667	1034	tags=43%, list=11%, signal=38%	64135/23586/4792/4790/4791/3551/5970/89122/6288
R-HSA-437239	Recycling pathway of L1	29	-0.562446	-1.92598	0.000204639	0.00378151	0.00306428	2208	tags=59%, list=24%, signal=45%	1808/7280/1785/7430/60/1759/4478/84617/10383/1211/84790/160/1175/10376/8986/1173/71
R-HSA-449147	Signaling by Interleukins	334	0.278997	1.51163	0.000209914	0.0038251	0.00309961	1759	tags=29%, list=19%, signal=24%	6775/84166/4067/1440/3656/4792/3383/29110/3557/6348/6351/3587/3627/1234/23118/3586/6772/92610/11213/11274/6352/5290/4790/6809/3559/3717/4791/9683/5782/5908/1326/3091/3551/7409/388372/9235/3572/6776/3181/4088/5707/10538/414062/6349/5306/6774/8350/5781/5295/5970/51561/10148/3574/57162/6773/834/10068/6288/9846/8454/5606/64127/3601/2919/8352/5771/8651/9261/8807/23765/4205/4001/3662/3569/1432/246778/5…
R-HSA-6799198	Complex I biogenesis	59	-0.462599	-1.84761	0.000226547	0.00407164	0.00329939	2167	tags=46%, list=24%, signal=35%	4722/4710/4719/4715/4725/3313/4723/4726/126328/4708/4712/4713/4706/51079/4540/4537/4696/4716/28976/374291/4718/4695/4536/4535/4541/4538/4714
R-HSA-5620971	Pyroptosis	24	0.613755	2.08419	0.000232111	0.00411527	0.00333474	1600	tags=50%, list=18%, signal=41%	25978/3002/838/3660/3659/837/128866/834/51652/1687/91782/29082
R-HSA-168181	Toll Like Receptor 7/8 (TLR7/8) Cascade	88	0.404804	1.8342	0.000247583	0.00433106	0.0035096	1807	tags=38%, list=20%, signal=30%	84166/3656/4792/80231/23118/92610/11274/4790/4791/9683/3665/1326/3551/23643/148022/121260/5970/57162/6288/8454/5606/64127/9261/4205/51311/1432/51231/5608/2353/7186/2002/79155/1385
R-HSA-157858	Gap junction trafficking and regulation	20	-0.646406	-2.02674	0.00031124	0.00537298	0.00435391	2083	tags=70%, list=23%, signal=54%	7280/1785/60/1759/1601/84617/10383/1211/84790/1212/10376/4646/1173/71
R-HSA-1650814	Collagen biosynthesis and modifying enzymes	14	-0.704406	-1.97266	0.000367014	0.00625353	0.00506745	1673	tags=64%, list=18%, signal=53%	64175/1298/10491/5479/871/26577/8985/5351/79709
R-HSA-211945	Phase I - Functionalization of compounds	32	-0.566638	-1.98704	0.000394426	0.00663445	0.00537612	1023	tags=38%, list=11%, signal=33%	8824/216/2052/1580/1545/217/1727/1572/1593/1555/1066/8639
R-HSA-168138	Toll Like Receptor 9 (TLR9) Cascade	90	0.399024	1.81508	0.000434424	0.00721474	0.00584634	1807	tags=37%, list=20%, signal=30%	84166/3656/4792/80231/23118/92610/11274/4790/4791/9683/3665/1326/3551/23643/148022/121260/5970/57162/6288/8454/5606/64145/64127/9261/4205/1432/51231/5608/2353/7186/2002/79155/1385
R-HSA-8854691	Interleukin-20 family signaling	12	0.739531	2.06809	0.000468359	0.00768109	0.00622425	1527	tags=75%, list=17%, signal=62%	6775/6772/3717/6776/6774/5781/6773/3716/3718
R-HSA-975155	MyD88 dependent cascade initiated on endosome	84	0.385022	1.72521	0.000615698	0.00997278	0.00808128	1807	tags=36%, list=20%, signal=29%	84166/3656/4792/23118/92610/11274/4790/4791/9683/3665/1326/3551/23643/148022/5970/57162/6288/8454/5606/64127/9261/4205/1432/51231/5608/2353/7186/2002/79155/1385
R-HSA-8964043	Plasma lipoprotein clearance	26	-0.582419	-1.93922	0.00065462	0.0104739	0.00848737	1267	tags=46%, list=14%, signal=40%	1211/3069/6233/7314/160/7311/57552/1175/949/348/341/1173
R-HSA-9705671	SARS-CoV-2 activates/modulates innate and adaptive immune responses	89	0.383683	1.74105	0.00069065	0.0109173	0.00884663	2141	tags=44%, list=24%, signal=34%	64135/23586/3656/9636/29110/3134/10802/23118/6772/567/5903/7187/3665/3551/5781/114548/89122/53371/6773/3455/7097/80143/23279/64127/3133/23765/9871/51311/51128/3716/3838/6396/7706/7096/3320/5289/1387/11097/4928
R-HSA-9646399	Aggrephagy	27	-0.558272	-1.88818	0.000815437	0.0127363	0.0103207	2393	tags=63%, list=26%, signal=47%	7846/8100/8655/51143/7280/3297/5116/84617/10383/11315/1778/84790/6233/7314/7431/7311/10376
R-HSA-5663205	Infectious disease	795	-0.233889	-1.32409	0.000832815	0.0128547	0.0104166	2144	tags=30%, list=24%, signal=25%	10152/100128731/64426/808/821/6204/11168/5777/55048/7280/3688/51121/6633/23478/27183/10284/6165/4641/2280/6210/10025/6654/8968/2071/79844/6227/5692/109/554313/6607/6606/6881/6382/6158/60/1104/375/3065/10971/6228/25920/6189/598/6147/3725/23511/5062/10146/6230/28972/6224/3159/6850/1025/11151/2214/2962/6173/999/5719/6229/10155/79643/11282/867/81857/9112/7284/84313/5349/8148/6125/2209/6231/6144/6232/…
R-HSA-380320	Recruitment of NuMA to mitotic centrosomes	57	-0.446966	-1.7782	0.000848899	0.0129506	0.0104943	2662	tags=53%, list=29%, signal=37%	7846/22919/11116/10844/8655/4926/7531/7280/5116/653784/10426/22897/1069/4957/54820/10142/5518/84617/10383/1778/80097/10540/84790/7532/1639/203068/1454/5566/11190/10376
R-HSA-168638	NOD1/2 Signaling Pathway	30	0.528234	1.89197	0.00090537	0.0136534	0.0110638	1568	tags=43%, list=17%, signal=36%	7128/3656/330/329/837/23118/1540/3551/834/64127/1432/5608/5603
R-HSA-9639288	Amino acids regulate mTORC1	39	0.497902	1.90563	0.000919104	0.013703	0.011104	1314	tags=44%, list=14%, signal=37%	64121/154743/528/58528/9550/51382/57600/11133/201163/526/96459/652968/8992/9114/6009/51606/10542
R-HSA-1433557	Signaling by SCF-KIT	31	0.524535	1.90184	0.000971247	0.0143177	0.0116021	1707	tags=45%, list=19%, signal=37%	4067/6772/5290/3717/7409/6776/6774/5781/5295/9846/8651/4893/3845/2242
R-HSA-8979227	Triglyceride metabolism	15	-0.671409	-1.90443	0.000983454	0.0143366	0.0116174	618	tags=33%, list=7%, signal=31%	51099/5499/5566/2171/2167
R-HSA-114608	Platelet degranulation	69	-0.419261	-1.73319	0.00107811	0.0155437	0.0125956	1861	tags=36%, list=21%, signal=29%	51368/83706/7094/6647/10487/2316/710/1521/7423/334/29789/5768/8407/1072/5175/928/87/54863/948/5216/226/3959/81/1675/2335
R-HSA-190873	Gap junction degradation	10	-0.75416	-1.94133	0.00109919	0.0156754	0.0127023	2023	tags=90%, list=22%, signal=70%	1785/60/1759/1601/1211/1212/4646/1173/71
R-HSA-9734767	Developmental Cell Lineages	34	-0.519849	-1.84976	0.00114813	0.0161973	0.0131252	1687	tags=44%, list=19%, signal=36%	3913/3691/3858/301/3911/8842/302/3855/3880/360/2171/972/3866/3852/2335
R-HSA-936440	Negative regulators of DDX58/IFIH1 signaling	32	0.527375	1.91567	0.00125468	0.0175121	0.0141907	1204	tags=41%, list=13%, signal=35%	64135/84166/7128/23586/9636/51191/29110/1540/7187/7323/89122/55593/7321
R-HSA-2122948	Activated NOTCH1 Transmits Signal to the Nucleus	21	-0.587266	-1.85337	0.00131084	0.0181034	0.0146698	1854	tags=48%, list=20%, signal=38%	5664/4851/23385/6233/7314/408/83464/7311/142678/23220
R-HSA-9709957	Sensory Perception	86	-0.394044	-1.69634	0.00136562	0.0186635	0.0151236	2503	tags=50%, list=28%, signal=37%	805/3778/4836/8861/157506/808/23173/4641/7430/6709/109/6382/60/9249/776/4478/9672/221914/2934/6337/344/117531/1645/5357/4023/5158/6385/11344/2059/54884/3339/11078/6804/54795/51109/2036/64787/4627/348/5330/71/5950/4035
R-HSA-877312	Regulation of IFNG signaling	13	0.693713	1.98957	0.00145373	0.0196628	0.0159334	2025	tags=77%, list=22%, signal=60%	6772/3717/5781/8554/3460/5771/8651/3716/3459/7341
R-HSA-9669938	Signaling by KIT in disease	17	0.641014	1.96991	0.00152071	0.0197542	0.0160075	1571	tags=53%, list=17%, signal=44%	4067/6772/5290/3717/6776/6774/5295/4893/3845
R-HSA-9670439	Signaling by phosphorylated juxtamembrane, extracellular and kinase domain KIT mutants	17	0.641014	1.96991	0.00152071	0.0197542	0.0160075	1571	tags=53%, list=17%, signal=44%	4067/6772/5290/3717/6776/6774/5295/4893/3845
R-HSA-445989	TAK1-dependent IKK and NF-kappa-B activation	36	0.497602	1.85308	0.0014822	0.0197542	0.0160075	1262	tags=36%, list=14%, signal=31%	84166/3656/4792/23118/92610/11274/4790/4791/9683/3551/5970/6288/64127
R-HSA-373760	L1CAM interactions	58	-0.437986	-1.73818	0.00150876	0.0197542	0.0160075	2474	tags=52%, list=27%, signal=38%	1460/288/11313/1808/7280/3688/1785/7430/6709/60/8828/1759/4478/6712/1457/84617/10383/1211/1742/84790/100133941/160/5605/1175/8829/5595/10376/8986/1173/71
R-HSA-163841	Gamma carboxylation, hypusinylation, hydroxylation, and arylsulfatase activation	30	-0.537907	-1.85436	0.00170311	0.021694	0.0175794	940	tags=33%, list=10%, signal=30%	1725/285362/11338/6194/25870/1938/100137047/6132/414/410
R-HSA-5696394	DNA Damage Recognition in GG-NER	36	-0.501716	-1.79926	0.00168794	0.021694	0.0175794	2335	tags=53%, list=26%, signal=39%	7528/10445/10980/86/60/5886/5887/1069/64708/2873/1642/8533/50813/6233/142/7314/54617/7311/29844
R-HSA-8984722	Interleukin-35 Signalling	10	0.731044	1.93554	0.00180645	0.0227891	0.0184668	1500	tags=70%, list=17%, signal=58%	6775/6772/3717/3572/6774/10148/3716
R-HSA-933543	NF-kB activation through FADD/RIP-1 pathway mediated by caspase-8 and -10	12	0.693052	1.93811	0.00191361	0.023911	0.0193759	863	tags=42%, list=10%, signal=38%	64135/23586/3551/843/89122
R-HSA-168643	Nucleotide-binding domain, leucine rich repeat containing receptor (NLR) signaling pathways	49	0.443964	1.78612	0.0019961	0.0247064	0.0200204	1568	tags=39%, list=17%, signal=32%	7128/3656/330/329/837/23118/4790/1540/4791/3551/9447/114548/5970/834/4210/64127/1432/5608/5603
R-HSA-76005	Response to elevated platelet cytosolic Ca2+	72	-0.395269	-1.65184	0.0021073	0.0258391	0.0209383	1861	tags=35%, list=21%, signal=28%	51368/83706/7094/6647/10487/2316/710/1521/7423/334/29789/5768/8407/1072/5175/928/87/54863/948/5216/226/3959/81/1675/2335
R-HSA-5696398	Nucleotide Excision Repair	88	-0.374224	-1.61733	0.00224282	0.0272461	0.0220785	2242	tags=43%, list=25%, signal=33%	7528/5426/6117/6612/10445/10980/2071/86/60/5886/5425/5887/1069/64708/56655/57654/5438/56949/54778/5982/2873/10401/5441/1642/57804/8533/50813/6233/142/7314/54617/27339/7311/5437/29844/5424/5434/7515
R-HSA-975138	TRAF6 mediated induction of NFkB and MAP kinases upon TLR7/8 or 9 activation	83	0.375414	1.67422	0.0022709	0.0273342	0.0221498	1807	tags=35%, list=20%, signal=28%	84166/3656/4792/23118/92610/11274/4790/4791/9683/1326/3551/23643/148022/5970/57162/6288/8454/5606/64127/9261/4205/1432/51231/5608/2353/7186/2002/79155/1385
R-HSA-2132295	MHC class II antigen presentation	82	-0.385924	-1.64638	0.00237506	0.0282592	0.0228994	2193	tags=49%, list=24%, signal=37%	8655/51143/8907/821/7280/3109/1512/1785/375/1759/3113/6712/3108/10120/84617/1508/10383/1211/162/22872/3122/1778/1514/10437/10540/84790/3119/3115/1639/160/10484/1075/3117/3123/5476/1509/1175/972/10376/1173
R-HSA-166058	MyD88:MAL(TIRAP) cascade initiated on plasma membrane	93	0.35335	1.6081	0.00245545	0.0282592	0.0228994	1807	tags=33%, list=20%, signal=27%	84166/3656/4792/23118/92610/11213/11274/4790/4791/9683/1326/3551/23643/5970/57162/6288/7097/8454/5606/64127/8651/9261/4205/1432/51231/5608/2353/7186/2002/79155/1385
R-HSA-168179	Toll Like Receptor TLR1:TLR2 Cascade	93	0.35335	1.6081	0.00245545	0.0282592	0.0228994	1807	tags=33%, list=20%, signal=27%	84166/3656/4792/23118/92610/11213/11274/4790/4791/9683/1326/3551/23643/5970/57162/6288/7097/8454/5606/64127/8651/9261/4205/1432/51231/5608/2353/7186/2002/79155/1385
R-HSA-168188	Toll Like Receptor TLR6:TLR2 Cascade	93	0.35335	1.6081	0.00245545	0.0282592	0.0228994	1807	tags=33%, list=20%, signal=27%	84166/3656/4792/23118/92610/11213/11274/4790/4791/9683/1326/3551/23643/5970/57162/6288/7097/8454/5606/64127/8651/9261/4205/1432/51231/5608/2353/7186/2002/79155/1385
R-HSA-181438	Toll Like Receptor 2 (TLR2) Cascade	93	0.35335	1.6081	0.00245545	0.0282592	0.0228994	1807	tags=33%, list=20%, signal=27%	84166/3656/4792/23118/92610/11213/11274/4790/4791/9683/1326/3551/23643/5970/57162/6288/7097/8454/5606/64127/8651/9261/4205/1432/51231/5608/2353/7186/2002/79155/1385
R-HSA-5368287	Mitochondrial translation	60	-0.41462	-1.66264	0.00257773	0.0294085	0.0238307	3107	tags=50%, list=34%, signal=33%	64969/5018/116541/51081/51021/55037/23107/65993/85476/64960/28973/84545/51650/124995/79590/10573/6182/740/7284/219402/51069/51253/51073/64975/128308/6150/51023/64963/6183/29093
R-HSA-163210	Formation of ATP by chemiosmotic coupling	19	-0.592621	-1.83163	0.00265678	0.0300491	0.0243498	3193	tags=74%, list=35%, signal=48%	517/4509/539/521/10632/515/9551/513/84833/506/518/516/498/4508
R-HSA-446652	Interleukin-1 family signaling	113	0.340934	1.60167	0.00275518	0.0308957	0.0250359	2750	tags=49%, list=30%, signal=34%	84166/3656/4792/29110/3557/23118/92610/11213/11274/4790/4791/9683/5782/1326/3551/4088/5707/6774/5781/5970/57162/834/10068/6288/8454/64127/5771/8807/5608/5685/5683/5684/7186/79155/54472/5706/8809/3553/5599/3554/4793/8878/5682/3606/5604/1147/23291/177/8517/5695/80216/9173/5718/8767/841
R-HSA-8953854	Metabolism of RNA	568	-0.241409	-1.32979	0.00285626	0.0317578	0.0257344	2834	tags=39%, list=31%, signal=29%	23759/6234/80145/9295/114049/10915/1655/54888/5688/6160/60528/6499/387338/88745/6201/5693/6203/9349/5439/5701/9360/3921/51593/10419/6169/1787/9092/2733/5901/9337/81929/6208/6152/6143/55651/4849/4927/6141/54920/151903/2091/3842/51428/6157/5700/7979/7919/6626/81608/8449/81605/6133/6206/6235/6134/22985/11052/10713/79050/8189/23020/6204/51121/6633/11051/10284/6165/6210/26097/2071/6227/5692/55629/1997…
R-HSA-5260271	Diseases of Immune System	25	0.543312	1.87128	0.00292326	0.031961	0.0258991	1059	tags=36%, list=12%, signal=32%	4792/4790/4791/7187/3551/23643/148022/5970/7097
R-HSA-5602358	Diseases associated with the TLR signaling cascade	25	0.543312	1.87128	0.00292326	0.031961	0.0258991	1059	tags=36%, list=12%, signal=32%	4792/4790/4791/7187/3551/23643/148022/5970/7097
R-HSA-2980736	Peptide hormone metabolism	34	-0.495884	-1.76448	0.00299133	0.0324349	0.0262831	2177	tags=53%, list=24%, signal=40%	64924/23478/60412/6934/10159/28972/4644/9789/4311/23265/1499/1522/6804/290/3624/1636/1509/1066
R-HSA-912694	Regulation of IFNA/IFNB signaling	12	0.673549	1.88358	0.00310732	0.0334164	0.0270785	1500	tags=58%, list=17%, signal=49%	6772/11274/5781/6773/3455/8651/3716
R-HSA-9020956	Interleukin-27 signaling	10	0.712902	1.8875	0.00321102	0.0342004	0.0277137	1500	tags=70%, list=17%, signal=58%	6772/3717/3572/6774/10148/246778/3716
R-HSA-196807	Nicotinate metabolism	17	0.611897	1.88043	0.00323235	0.0342004	0.0277137	1224	tags=47%, list=13%, signal=41%	79668/54625/83666/10135/952/84875/65220/56965
R-HSA-5663084	Diseases of carbohydrate metabolism	21	-0.556566	-1.75648	0.00326598	0.0342797	0.027778	1705	tags=52%, list=19%, signal=43%	6888/3423/138050/2990/4669/6233/7314/3425/92579/7311/2548
R-HSA-5389840	Mitochondrial translation elongation	57	-0.417214	-1.65984	0.00342921	0.0357074	0.0289349	3107	tags=51%, list=34%, signal=34%	64969/5018/116541/51081/51021/55037/23107/65993/85476/64960/28973/84545/51650/124995/79590/10573/6182/740/7284/51069/51253/51073/64975/128308/6150/51023/64963/6183/29093
R-HSA-8848021	Signaling by PTK6	40	-0.469136	-1.72813	0.0035007	0.0358821	0.0290765	844	tags=25%, list=9%, signal=23%	6233/7314/1839/27043/10457/7311/2034/595/9564/207
R-HSA-9006927	Signaling by Non-Receptor Tyrosine Kinases	40	-0.469136	-1.72813	0.0035007	0.0358821	0.0290765	844	tags=25%, list=9%, signal=23%	6233/7314/1839/27043/10457/7311/2034/595/9564/207
R-HSA-8953897	Cellular responses to stimuli	689	-0.231139	-1.29486	0.00353128	0.035915	0.0291031	2524	tags=34%, list=28%, signal=27%	6208/64682/6152/805/6143/1460/4927/6141/648/6157/5700/6119/7979/90993/7290/527/10525/8655/23043/51143/6133/1200/6206/6235/389541/6134/4609/55004/3162/6117/113/25824/5747/3326/80205/23309/7531/7157/808/6204/7280/3688/51121/3014/3297/6165/1388/115209/55766/9681/6210/54468/8968/5296/7184/6227/10743/5692/1329/109/554313/10963/6158/5601/1340/6228/6189/3313/598/6256/9531/6147/3725/55466/23511/6230/1195…
R-HSA-3000171	Non-integrin membrane-ECM interactions	32	-0.510145	-1.78893	0.00361406	0.0363836	0.0294829	2081	tags=50%, list=23%, signal=39%	3688/6382/60/3913/3691/9672/780/3911/6641/59/6385/3339/87/71/3693/2335
R-HSA-9609507	Protein localization	100	-0.355248	-1.57612	0.00363282	0.0363836	0.0294829	2257	tags=39%, list=25%, signal=30%	3162/439/5621/51025/55825/3313/6342/5824/10005/26521/1891/51/10469/54543/506/50/6449/6901/92609/400916/516/6233/7314/3417/100188893/224/498/1431/6804/118424/84269/7311/1528/9218/293/847/51287/4714/10452
R-HSA-140534	Caspase activation via Death Receptors in the presence of ligand	14	0.643114	1.86535	0.0038353	0.037112	0.0300731	744	tags=36%, list=8%, signal=33%	355/8837/8743/23643/148022
R-HSA-933541	TRAF6 mediated IRF7 activation	14	0.641847	1.86168	0.00387815	0.037112	0.0300731	2112	tags=71%, list=23%, signal=55%	64135/23586/29110/10010/3665/89122/80143/7186/7706/1387
R-HSA-5633008	TP53 Regulates Transcription of Cell Death Genes	32	0.495224	1.79888	0.00375282	0.037112	0.0300731	986	tags=28%, list=11%, signal=25%	355/5366/7159/27113/665/637/5875/843/834
R-HSA-9865881	Complex III assembly	18	-0.590317	-1.77412	0.00390013	0.037112	0.0300731	2410	tags=56%, list=27%, signal=41%	3954/57128/10975/7388/3313/9054/84300/29796/4519/7384
R-HSA-6805567	Keratinization	30	-0.511986	-1.765	0.00379938	0.037112	0.0300731	2013	tags=57%, list=22%, signal=44%	1475/5493/3853/3860/6768/3858/3851/3856/11187/1832/3855/823/3880/826/3866/23254/3852
R-HSA-6809371	Formation of the cornified envelope	30	-0.511986	-1.765	0.00379938	0.037112	0.0300731	2013	tags=57%, list=22%, signal=44%	1475/5493/3853/3860/6768/3858/3851/3856/11187/1832/3855/823/3880/826/3866/23254/3852
R-HSA-8978868	Fatty acid metabolism	80	-0.381819	-1.61897	0.00390355	0.037112	0.0300731	1867	tags=36%, list=21%, signal=29%	84320/6256/64834/2194/6342/1632/10005/47/51/80724/3032/1374/4706/2879/31/224/64174/5096/376497/1580/1545/80221/4048/5445/5538/37/11000/6319/3030
R-HSA-9925563	Developmental Lineage of Pancreatic Ductal Cells	17	-0.594578	-1.75368	0.00403386	0.038075	0.0308535	1687	tags=53%, list=19%, signal=43%	3913/301/3911/8842/302/3855/3880/972/2335
R-HSA-918233	TRAF3-dependent IRF activation pathway	13	0.660283	1.8937	0.00415877	0.0389736	0.0315817	1185	tags=54%, list=13%, signal=47%	64135/23586/29110/7187/3665/89122/80143
R-HSA-5368286	Mitochondrial translation initiation	56	-0.412968	-1.63624	0.00427833	0.0398097	0.0322591	3107	tags=50%, list=34%, signal=33%	64969/5018/116541/51081/51021/55037/23107/65993/64960/28973/84545/51650/124995/79590/10573/6182/740/219402/51069/51253/51073/64975/128308/6150/51023/64963/6183/29093
R-HSA-5689896	Ovarian tumor domain proteases	28	0.510403	1.79726	0.00466036	0.0430591	0.0348922	2002	tags=54%, list=22%, signal=42%	64135/7128/23586/10318/7187/5728/79931/89122/55593/7321/64127/80124/79155/387/7706
R-HSA-9725554	Differentiation of Keratinocytes in Interfollicular Epidermis in Mammalian Skin	14	-0.636791	-1.78331	0.0047589	0.0436621	0.0353808	2964	tags=79%, list=33%, signal=53%	93099/26018/3655/3688/3691/3858/3880/360/2171/3866/3852
R-HSA-5610787	Hedgehog 'off' state	66	-0.393628	-1.60772	0.00503812	0.0459029	0.0371967	3079	tags=58%, list=34%, signal=38%	83737/10213/5686/5713/5694/26160/2735/5688/5693/5701/7846/55764/5700/7979/8100/80199/113/7280/5692/109/5719/5576/84617/10383/57728/84790/2932/5709/6233/7314/5714/196883/7311/5566/5708/2778/10376/11047
R-HSA-9703465	Signaling by FLT3 fusion proteins	18	0.587645	1.83299	0.00509458	0.0460972	0.0373541	1571	tags=50%, list=17%, signal=41%	2804/5290/2120/6776/5295/9846/9321/4893/3845
R-HSA-168142	Toll Like Receptor 10 (TLR10) Cascade	80	0.362287	1.60333	0.00532167	0.0471759	0.0382282	1807	tags=34%, list=20%, signal=27%	84166/3656/4792/23118/92610/11274/4790/4791/9683/1326/3551/5970/57162/6288/8454/5606/64127/9261/4205/1432/51231/5608/2353/7186/2002/79155/1385
R-HSA-168176	Toll Like Receptor 5 (TLR5) Cascade	80	0.362287	1.60333	0.00532167	0.0471759	0.0382282	1807	tags=34%, list=20%, signal=27%	84166/3656/4792/23118/92610/11274/4790/4791/9683/1326/3551/5970/57162/6288/8454/5606/64127/9261/4205/1432/51231/5608/2353/7186/2002/79155/1385
R-HSA-975871	MyD88 cascade initiated on plasma membrane	80	0.362287	1.60333	0.00532167	0.0471759	0.0382282	1807	tags=34%, list=20%, signal=27%	84166/3656/4792/23118/92610/11274/4790/4791/9683/1326/3551/5970/57162/6288/8454/5606/64127/9261/4205/1432/51231/5608/2353/7186/2002/79155/1385
R-HSA-2024096	HS-GAG degradation	16	-0.617197	-1.78427	0.00555527	0.0489162	0.0396385	1918	tags=62%, list=21%, signal=49%	6382/3423/138050/9672/221914/2990/4669/6385/3339/3425
R-HSA-1059683	Interleukin-6 signaling	11	0.688197	1.87075	0.00561531	0.0491152	0.0397997	1500	tags=64%, list=17%, signal=53%	6772/3717/3572/6774/5781/3569/3716
R-HSA-1810476	RIP-mediated NFkB activation via ZBP1	15	0.636532	1.89766	0.00570749	0.0495909	0.0401852	846	tags=47%, list=9%, signal=42%	4792/4790/4791/3551/81030/148022/5970
