# Supplementary material for: Host–microbiome archetypes differentiate infection from pathogen carriage in the human lower airway
Source: Nat Commun. 2026 Apr 13;17:5149. doi: 10.1038/s41467-026-71863-5 (PMC13250161; doi:10.1038/s41467-026-71863-5)
Supplement: Supplementary file 8 — Supplementary Data 6 [file 41467_2026_71863_MOESM8_ESM.xlsx]

## Sheet: A (viral LRTI v CTRL)
ENSEMBL_ID	gene_symbol	logFC	AveExpr	t	P.Value	adj.P.Val	B
ENSG00000000419	DPM1	0.389612	0.949266	2.46819	0.0142981	0.0430824	-3.76755
ENSG00000000938	FGR	0.151819	5.67504	1.0723	0.284693	0.422719	-6.37104
ENSG00000001036	FUCA2	-0.116475	0.855004	-0.80983	0.418863	0.559009	-6.44823
ENSG00000001084	GCLC	-0.257627	0.893088	-1.25043	0.212393	0.339967	-6.02297
ENSG00000001167	NFYA	0.23164	1.14874	1.50847	0.132787	0.239142	-5.66362
ENSG00000001626	CFTR	0.370528	1.69376	0.927309	0.354724	0.495024	-6.41684
ENSG00000001629	ANKIB1	0.418121	1.27434	2.34289	0.0199758	0.0558325	-4.1067
ENSG00000001630	CYP51A1	-0.0223643	0.436443	-0.130286	0.896452	0.933927	-6.67744
ENSG00000001631	KRIT1	-0.386306	0.801291	-2.2855	0.0231813	0.0627948	-4.22414
ENSG00000002016	RAD52	0.00400908	-0.436925	0.0195922	0.984385	0.989613	-6.50751
ENSG00000002330	BAD	-0.434935	0.56309	-2.07126	0.0394333	0.0946323	-4.63853
ENSG00000002549	LAP3	1.59433	3.88342	6.34597	1.13796e-09	4.34187e-08	11.5336
ENSG00000002586	CD99	-0.29728	3.19794	-2.13477	0.0338216	0.0843313	-4.70246
ENSG00000002587	HS3ST1	-0.542228	-0.0324802	-2.09272	0.0374544	0.0912416	-4.47654
ENSG00000002822	MAD1L1	-0.0236757	1.82329	-0.134406	0.893197	0.931423	-6.87274
ENSG00000002834	LASP1	-0.100251	3.72425	-0.902202	0.36788	0.508982	-6.54823
ENSG00000002919	SNX11	0.264777	1.68394	1.70137	0.0902056	0.178095	-5.4283
ENSG00000002933	TMEM176A	0.960527	1.70571	4.06526	6.56062e-05	0.000567511	1.10749
ENSG00000003056	M6PR	0.0263364	3.43917	0.185346	0.853119	0.90487	-6.9323
ENSG00000003147	ICA1	-0.667517	-0.0533458	-2.90949	0.00396999	0.0158054	-2.52456
ENSG00000003393	ALS2	0.0276463	0.170065	0.15584	0.876293	0.919894	-6.62029
ENSG00000003400	CASP10	1.04971	1.62481	5.13099	6.06206e-07	1.09495e-05	5.56956
ENSG00000003402	CFLAR	0.72089	6.28523	5.65126	4.62166e-08	1.17864e-06	7.94581
ENSG00000003436	TFPI	-0.646643	0.200854	-3.5651	0.000441089	0.00268693	-0.577714
ENSG00000003509	NDUFAF7	-0.0614072	-0.210491	-0.33793	0.735719	0.820857	-6.48589
ENSG00000003756	RBM5	0.144514	3.67982	1.34886	0.17869	0.299205	-6.04947
ENSG00000004059	ARF5	-0.0161868	2.75868	-0.134674	0.892985	0.931301	-6.92609
ENSG00000004142	POLDIP2	0.0431412	0.473849	0.291446	0.770969	0.846939	-6.64772
ENSG00000004399	PLXND1	-0.447078	2.60454	-2.64207	0.00879742	0.0295872	-3.51402
ENSG00000004455	AK2	0.202249	2.24692	1.46559	0.144104	0.254679	-5.84172
ENSG00000004468	CD38	1.82999	1.45704	6.78659	9.38153e-11	4.66423e-09	14.0704
ENSG00000004478	FKBP4	-0.32971	1.47319	-1.54923	0.122681	0.225355	-5.68373
ENSG00000004487	KDM1A	-0.874692	-0.106543	-5.8976	1.28533e-08	3.79964e-07	9.3425
ENSG00000004534	RBM6	0.00530276	1.7939	0.0446948	0.964389	0.978959	-6.87313
ENSG00000004660	CAMKK1	-0.230285	-0.0647612	-1.29362	0.197076	0.321461	-5.77907
ENSG00000004700	RECQL	0.0410099	0.347416	0.224647	0.822451	0.883672	-6.6465
ENSG00000004766	VPS50	-0.0449232	0.0700186	-0.214967	0.829981	0.888678	-6.60292
ENSG00000004779	NDUFAB1	-0.57828	0.633743	-2.62833	0.00914999	0.0304196	-3.39734
ENSG00000004838	ZMYND10	-1.4273	0.0870062	-4.75706	3.44209e-06	4.77973e-05	3.95647
ENSG00000004864	SLC25A13	0.646802	2.46346	2.6721	0.00806913	0.0277251	-3.40536
ENSG00000004866	ST7	-1.06248	-0.404475	-4.68801	4.69259e-06	6.21721e-05	3.74064
ENSG00000004897	CDC27	0.187684	1.84206	1.46032	0.145547	0.256551	-5.82128
ENSG00000004975	DVL2	-0.261936	1.15371	-1.64028	0.102294	0.196608	-5.49611
ENSG00000005001	PRSS22	-0.346211	0.262459	-1.14325	0.254104	0.389141	-6.03902
ENSG00000005007	UPF1	-0.155566	2.43707	-1.31298	0.190478	0.313713	-6.07226
ENSG00000005020	SKAP2	0.0741237	3.37618	0.480952	0.631001	0.739688	-6.83349
ENSG00000005022	SLC25A5	-0.546715	2.37728	-3.46	0.000642084	0.00364094	-1.1249
ENSG00000005059	MCUB	-0.0874375	1.24744	-0.46365	0.643331	0.749372	-6.71737
ENSG00000005075	POLR2J	-0.151149	1.44692	-0.991576	0.322431	0.462617	-6.36503
ENSG00000005156	LIG3	-0.0553115	1.06396	-0.334648	0.738191	0.822869	-6.74556
ENSG00000005175	RPAP3	0.180894	0.327684	0.823137	0.41127	0.551197	-6.32137
ENSG00000005187	ACSM3	0.330412	0.901647	1.36136	0.174713	0.293745	-5.82398
ENSG00000005194	CIAPIN1	-0.146049	-0.0412923	-0.744455	0.45735	0.593169	-6.31853
ENSG00000005206	SPPL2B	-0.454258	0.970394	-2.33592	0.0203432	0.0566661	-4.13895
ENSG00000005238	FAM214B	-0.288784	1.77619	-1.88855	0.0601924	0.130947	-5.12591
ENSG00000005302	MSL3	0.637405	2.82778	4.09338	5.86042e-05	0.000518795	1.12451
ENSG00000005339	CREBBP	0.323975	4.43424	1.705	0.0895254	0.177108	-5.51545
ENSG00000005379	TSPOAP1	0.315805	1.38386	1.29139	0.197844	0.322447	-5.99218
ENSG00000005448	WDR54	-1.07295	-0.782738	-4.48445	1.14687e-05	0.000132509	2.95533
ENSG00000005483	KMT2E	0.48306	3.73133	3.81307	0.000175703	0.00125882	0.0673462
ENSG00000005486	RHBDD2	-0.441035	2.86956	-2.94654	0.00353913	0.0144862	-2.70249
ENSG00000005700	IBTK	-0.317743	0.159235	-2.23858	0.0261269	0.0687867	-4.20984
ENSG00000005801	ZNF195	-0.470438	0.0474547	-2.13445	0.0338486	0.0843353	-4.4222
ENSG00000005810	MYCBP2	0.34188	2.02386	2.63592	0.00895356	0.029941	-3.48035
ENSG00000005812	FBXL3	0.411638	1.49515	2.78033	0.0058733	0.0214216	-3.05052
ENSG00000005844	ITGAL	-0.0551029	3.13202	-0.377834	0.705897	0.796521	-6.87403
ENSG00000005884	ITGA3	-1.13644	-0.116595	-5.06791	8.18112e-07	1.41787e-05	5.35882
ENSG00000005889	ZFX	0.356142	2.28932	2.43711	0.0155533	0.0458403	-3.98918
ENSG00000005893	LAMP2	0.25883	3.3716	1.7514	0.08119	0.164723	-5.43023
ENSG00000006007	GDE1	-0.24382	0.673518	-1.42122	0.156587	0.271142	-5.75111
ENSG00000006015	REX1BD	-0.737463	0.758029	-4.12452	5.16818e-05	0.000469332	1.34551
ENSG00000006118	TMEM132A	-0.0160812	0.845971	-0.0855616	0.931888	0.95759	-6.76752
ENSG00000006125	AP2B1	0.434481	3.09023	3.42464	0.000727121	0.00399658	-1.24552
ENSG00000006194	ZNF263	-0.0877989	0.0432666	-0.580351	0.562238	0.686088	-6.46025
ENSG00000006282	SPATA20	-0.414838	0.176074	-2.67425	0.00801901	0.0275818	-3.19872
ENSG00000006327	TNFRSF12A	-1.00177	0.809032	-4.1597	4.48012e-05	0.000419622	1.46241
ENSG00000006451	RALA	0.245094	1.79459	1.43537	0.152521	0.266019	-5.84677
ENSG00000006453	BAIAP2L1	-0.0767082	0.733405	-0.475765	0.634687	0.742564	-6.64465
ENSG00000006459	KDM7A	0.30018	1.1024	1.98676	0.0481182	0.110363	-4.83199
ENSG00000006530	AGK	0.104951	1.24553	0.696068	0.487079	0.619724	-6.57413
ENSG00000006534	ALDH3B1	-0.653842	1.6832	-4.03189	7.4951e-05	0.000629906	0.913615
ENSG00000006576	PHTF2	0.339213	-0.117917	1.83966	0.0670881	0.142546	-4.88332
ENSG00000006607	FARP2	-0.522386	0.710377	-2.43241	0.0157514	0.0462995	-3.89352
ENSG00000006634	DBF4	0.511326	-0.204476	2.15341	0.0323117	0.0813703	-4.24816
ENSG00000006652	IFRD1	0.371479	4.1487	2.15419	0.0322493	0.0812338	-4.66603
ENSG00000006712	PAF1	0.433572	2.62727	3.35542	0.000924846	0.00486595	-1.452
ENSG00000006715	VPS41	-0.111838	1.95044	-0.731917	0.464953	0.599802	-6.62774
ENSG00000006744	ELAC2	-0.310006	0.651134	-1.73871	0.0834044	0.167969	-5.26673
ENSG00000006747	SCIN	0.000306348	0.02731	0.00129432	0.998968	0.999476	-6.60344
ENSG00000006756	ARSD	-0.643527	0.361929	-4.70511	4.34726e-06	5.81446e-05	3.7366
ENSG00000006831	ADIPOR2	0.0754301	1.49638	0.512025	0.609118	0.723125	-6.72135
ENSG00000006837	CDKL3	0.389828	-0.196517	1.73892	0.0833667	0.167928	-5.0486
ENSG00000007047	MARK4	-0.203657	1.5534	-1.45842	0.146068	0.25718	-5.81149
ENSG00000007062	PROM1	-1.75056	-0.506802	-6.7911	9.1396e-11	4.61386e-09	14.1082
ENSG00000007080	CCDC124	-0.805061	1.13611	-5.03876	9.38802e-07	1.57975e-05	5.11533
ENSG00000007129	CEACAM21	-0.0187022	-0.45748	-0.0850992	0.932255	0.957748	-6.49812
ENSG00000007168	PAFAH1B1	0.119263	3.43778	1.15825	0.247947	0.382001	-6.28333
ENSG00000007174	DNAH9	-1.50716	-0.533325	-6.00123	7.41857e-09	2.34065e-07	9.88476
ENSG00000007202	KIAA0100	-0.1894	2.08905	-1.5957	0.111909	0.210194	-5.64816
ENSG00000007237	AC005747.1	0.65245	3.61507	3.66894	0.000301769	0.00197909	-0.435805
ENSG00000007264	MATK	-0.335092	-0.0758	-1.39098	0.165555	0.282939	-5.66339
ENSG00000007341	ST7L	0.427109	0.927453	2.8571	0.00466121	0.0178541	-2.77307
ENSG00000007392	LUC7L	-0.283976	1.00406	-2.18468	0.029908	0.0765494	-4.46442
ENSG00000007516	BAIAP3	-1.17252	0.246126	-4.8005	2.82735e-06	4.081e-05	4.13104
ENSG00000007520	TSR3	-0.191023	0.530922	-1.18637	0.236684	0.369447	-6.02948
ENSG00000007541	PIGQ	-0.947047	0.413916	-4.79522	2.89603e-06	4.15576e-05	4.10559
ENSG00000007545	CRAMP1	-0.130323	-0.008835	-0.535885	0.592548	0.710134	-6.4741
ENSG00000007923	DNAJC11	-0.347719	0.219623	-1.64284	0.101761	0.195805	-5.34513
ENSG00000007944	MYLIP	0.837425	1.15819	4.42184	1.50052e-05	0.000166341	2.55487
ENSG00000008018	PSMB1	0.259271	2.2839	1.6166	0.107315	0.203635	-5.61384
ENSG00000008083	JARID2	0.0119463	1.71281	0.0874853	0.930361	0.956498	-6.86427
ENSG00000008086	CDKL5	0.00133261	0.65245	0.00589131	0.995304	0.996925	-6.72824
ENSG00000008128	CDK11A	0.268145	2.1059	1.7211	0.0865578	0.17266	-5.42733
ENSG00000008130	NADK	0.949654	5.55914	7.25602	5.85716e-12	3.71986e-10	16.6537
ENSG00000008226	DLEC1	-1.62132	-0.272255	-8.4478	3.20131e-15	4.3769e-13	24.0337
ENSG00000008256	CYTH3	-0.578627	-0.0663582	-2.78982	0.00570941	0.020948	-2.85672
ENSG00000008282	SYPL1	-0.116132	1.05354	-0.825441	0.409964	0.549971	-6.46498
ENSG00000008283	CYB561	-1.11275	0.066814	-4.98583	1.20344e-06	1.94672e-05	4.97436
ENSG00000008294	SPAG9	0.285473	4.23472	1.93204	0.0545645	0.121496	-5.11021
ENSG00000008323	PLEKHG6	0.14407	1.73494	0.668719	0.504336	0.635156	-6.64225
ENSG00000008382	MPND	-0.614465	0.220934	-2.94171	0.0035928	0.0146328	-2.49723
ENSG00000008394	MGST1	-0.524988	1.50921	-2.4728	0.0141196	0.0427014	-3.87912
ENSG00000008438	PGLYRP1	-0.221816	1.04787	-0.802628	0.423006	0.562484	-6.47509
ENSG00000008513	ST3GAL1	0.0724349	3.18222	0.521461	0.60254	0.717914	-6.81
ENSG00000008516	MMP25	0.319293	4.65743	1.31767	0.188905	0.311482	-6.09182
ENSG00000008517	IL32	1.02478	2.04449	3.90732	0.000122286	0.000936503	0.495622
ENSG00000008710	PKD1	-1.06088	1.29326	-5.30843	2.57121e-07	5.27313e-06	6.33703
ENSG00000008838	MED24	-0.211743	1.7438	-1.36796	0.172641	0.291332	-5.95735
ENSG00000008869	HEATR5B	0.502907	0.888333	2.68503	0.00777258	0.0269603	-3.2132
ENSG00000008952	SEC62	-0.179636	3.43959	-1.27164	0.204768	0.330341	-6.14894
ENSG00000008988	RPS20	-0.36413	4.63033	-2.21484	0.0277375	0.0720442	-4.5346
ENSG00000009307	CSDE1	0.000906082	3.75214	0.0078131	0.993773	0.995932	-6.95204
ENSG00000009335	UBE3C	-0.196786	1.04007	-1.4974	0.135641	0.243388	-5.69941
ENSG00000009413	REV3L	0.0564567	1.29226	0.303525	0.76176	0.840292	-6.77922
ENSG00000009780	FAM76A	-0.199287	-0.0915329	-0.972816	0.331652	0.471721	-6.12434
ENSG00000009790	TRAF3IP3	0.3753	2.80672	2.00601	0.0460096	0.106499	-4.94357
ENSG00000009830	POMT2	-0.708824	0.0420624	-3.14599	0.00187046	0.00864451	-1.88742
ENSG00000009844	VTA1	0.585447	0.581	3.02643	0.00275204	0.0118768	-2.22488
ENSG00000009954	BAZ1B	-0.151871	0.231711	-1.12061	0.263607	0.399847	-6.03868
ENSG00000010017	RANBP9	0.384339	1.21698	2.57667	0.0105916	0.0342073	-3.54113
ENSG00000010030	ETV7	2.78467	0.819458	6.77119	1.02549e-10	5.02235e-09	14.0052
ENSG00000010219	DYRK4	-0.412465	-0.483537	-1.6503	0.100226	0.193266	-5.2106
ENSG00000010244	ZNF207	0.480889	3.67315	3.55343	0.000460058	0.00277331	-0.831048
ENSG00000010256	UQCRC1	-0.435615	2.58714	-3.19788	0.00157615	0.00749909	-1.95815
ENSG00000010270	STARD3NL	0.068611	1.43192	0.571455	0.568241	0.690418	-6.68002
ENSG00000010278	CD9	-1.08365	2.67716	-4.57835	7.62282e-06	9.34484e-05	3.04008
ENSG00000010292	NCAPD2	-0.0319948	0.486691	-0.189954	0.84951	0.902793	-6.68992
ENSG00000010295	IFFO1	0.0117493	0.169908	0.084514	0.93272	0.957748	-6.61432
ENSG00000010310	GIPR	-0.812212	-0.412426	-3.74651	0.000226006	0.00155147	0.134164
ENSG00000010322	NISCH	-0.214902	1.37836	-1.74119	0.0829685	0.167399	-5.3516
ENSG00000010327	STAB1	0.381846	2.51458	2.04494	0.0419831	0.0990607	-4.85004
ENSG00000010361	FUZ	-0.857982	-0.0130558	-3.97434	9.41092e-05	0.000762439	0.882815
ENSG00000010404	IDS	-0.274532	3.2814	-2.67198	0.00807193	0.0277251	-3.45085
ENSG00000010539	ZNF200	0.522499	1.42168	2.97229	0.0032654	0.0135803	-2.50877
ENSG00000010610	CD4	-0.444183	1.94895	-2.84098	0.00489497	0.0185617	-2.95876
ENSG00000010626	LRRC23	-1.19882	0.277982	-5.22697	3.82205e-07	7.40636e-06	6.03644
ENSG00000010671	BTK	0.359081	1.90744	2.35531	0.0193359	0.0543369	-4.14633
ENSG00000010803	SCMH1	-0.48084	-0.257429	-2.62836	0.00914922	0.0304196	-3.21086
ENSG00000010810	FYN	0.240699	2.06748	1.33337	0.183709	0.305221	-6.00298
ENSG00000010818	HIVEP2	0.697362	1.98169	3.86298	0.00014514	0.00107345	0.321162
ENSG00000011007	ELOA	-0.199471	0.292097	-1.31899	0.188465	0.310932	-5.8183
ENSG00000011009	LYPLA2	-0.098735	1.85484	-0.770414	0.441834	0.579767	-6.59141
ENSG00000011021	CLCN6	0.261217	1.13561	1.55132	0.122179	0.224684	-5.59785
ENSG00000011114	BTBD7	-0.0774375	0.768845	-0.585006	0.559108	0.683654	-6.58932
ENSG00000011132	APBA3	0.0474138	0.826278	0.284154	0.776545	0.850975	-6.72245
ENSG00000011198	ABHD5	-0.481155	2.36647	-2.77908	0.00589521	0.0214855	-3.14989
ENSG00000011243	AKAP8L	-0.157217	1.96167	-1.32821	0.185405	0.307312	-6.02274
ENSG00000011260	UTP18	0.615031	1.40922	3.90998	0.000121026	0.000929313	0.539893
ENSG00000011275	RNF216	-0.231151	0.780692	-1.60985	0.108783	0.205974	-5.48877
ENSG00000011295	TTC19	-0.253013	0.707367	-1.6877	0.0928037	0.182129	-5.35479
ENSG00000011304	PTBP1	-0.293984	3.06623	-2.18074	0.0302021	0.0772433	-4.60404
ENSG00000011405	PIK3C2A	-0.139891	0.26348	-0.767134	0.443777	0.58136	-6.36819
ENSG00000011422	PLAUR	-0.00446491	7.33793	-0.0264344	0.978933	0.985743	-6.91279
ENSG00000011451	WIZ	-0.39257	0.109407	-2.61128	0.00960491	0.0315996	-3.33687
ENSG00000011454	RABGAP1	0.386815	1.41937	2.57876	0.0105297	0.0340295	-3.56543
ENSG00000011485	PPP5C	-0.701445	0.297103	-3.69894	0.000269999	0.00180195	-0.136122
ENSG00000011523	CEP68	0.452218	1.23228	2.89475	0.0041543	0.0163711	-2.70018
ENSG00000011566	MAP4K3	-0.336401	0.831892	-1.67231	0.0958029	0.186528	-5.40283
ENSG00000011600	TYROBP	-0.13007	6.84323	-1.17543	0.241022	0.374454	-6.23524
ENSG00000011638	TMEM159	0.015706	0.285874	0.0981489	0.921898	0.951375	-6.65463
ENSG00000012048	BRCA1	-0.0238507	0.424593	-0.12142	0.903463	0.938846	-6.67695
ENSG00000012061	ERCC1	-0.502613	1.75391	-3.37995	0.000849647	0.00456048	-1.34929
ENSG00000012124	CD22	0.851612	2.46049	3.04825	0.00256699	0.0112109	-2.36519
ENSG00000012171	SEMA3B	0.0330678	-0.028079	0.181481	0.856148	0.906228	-6.55871
ENSG00000012211	PRICKLE3	-0.25487	-0.123333	-1.37779	0.169586	0.28773	-5.67183
ENSG00000012223	LTF	0.119419	1.17124	0.490925	0.62394	0.734609	-6.6906
ENSG00000012232	EXTL3	-0.17967	1.51565	-1.13602	0.257114	0.392346	-6.21944
ENSG00000012660	ELOVL5	0.454866	3.1659	3.73651	0.00023465	0.00160076	-0.194492
ENSG00000012779	ALOX5	0.11731	5.44758	0.694671	0.487952	0.620235	-6.70527
ENSG00000012822	CALCOCO1	-0.247857	1.97985	-2.00945	0.0456402	0.105938	-4.91239
ENSG00000012983	MAP4K5	-0.789736	0.696164	-4.09547	5.81121e-05	0.000516762	1.23301
ENSG00000013275	PSMC4	-0.138129	1.71382	-1.12675	0.261006	0.397116	-6.24539
ENSG00000013288	MAN2B2	-0.338386	0.744467	-2.57256	0.0107146	0.0345101	-3.53416
ENSG00000013306	SLC25A39	-0.483647	1.45885	-3.27665	0.00121036	0.00605424	-1.6541
ENSG00000013364	MVP	0.0230914	4.22269	0.244875	0.806768	0.871866	-6.92352
ENSG00000013374	NUB1	1.54067	2.89823	6.99595	2.76168e-11	1.48557e-09	15.1729
ENSG00000013375	PGM3	-0.831515	0.0646145	-3.84321	0.000156591	0.00114865	0.396942
ENSG00000013441	CLK1	0.400764	3.48188	2.97962	0.00319106	0.0133331	-2.61149
ENSG00000013561	RNF14	-0.0613899	0.650925	-0.431119	0.66678	0.766259	-6.63887
ENSG00000013563	DNASE1L1	-0.270127	1.33924	-1.69926	0.0906018	0.178627	-5.41344
ENSG00000013573	DDX11	-0.942003	0.884808	-3.37331	0.000869407	0.00464211	-1.30077
ENSG00000013583	HEBP1	-0.299591	0.307636	-1.70801	0.0889642	0.17621	-5.25244
ENSG00000013588	GPRC5A	-0.803016	0.984482	-2.87853	0.00436622	0.017029	-2.78834
ENSG00000013725	CD6	-0.299083	1.08243	-1.6561	0.0990452	0.191402	-5.46427
ENSG00000013810	TACC3	0.0655732	1.96512	0.457108	0.648019	0.752478	-6.78254
ENSG00000014164	ZC3H3	0.294732	1.83722	1.84553	0.0662265	0.141234	-5.18683
ENSG00000014216	CAPN1	-0.314851	2.89358	-2.90146	0.00406942	0.0160946	-2.82903
ENSG00000014257	ACPP	0.480945	0.463037	2.2002	0.0287735	0.0743038	-4.27586
ENSG00000014824	SLC30A9	-0.159286	0.472375	-1.0959	0.274252	0.411546	-6.11423
ENSG00000014919	COX15	-0.00556961	0.455446	-0.0356409	0.971599	0.982537	-6.70358
ENSG00000015133	CCDC88C	-0.404734	1.25632	-2.27361	0.0238989	0.0642437	-4.29586
ENSG00000015153	YAF2	0.329129	0.933936	1.72586	0.0856967	0.171393	-5.28013
ENSG00000015171	ZMYND11	-0.498887	-0.0482988	-2.88367	0.00429802	0.016843	-2.5969
ENSG00000015285	WAS	0.375047	4.03498	2.79563	0.00561111	0.0206334	-3.12733
ENSG00000015475	BID	0.324635	4.35633	1.92484	0.055465	0.122917	-5.12373
ENSG00000015479	MATR3	-0.0290427	2.30149	-0.22869	0.81931	0.88139	-6.89042
ENSG00000015568	RGPD5	-0.819908	2.0702	-3.57413	0.000426908	0.00261837	-0.739543
ENSG00000015676	NUDCD3	-0.403309	0.665522	-2.47861	0.0138975	0.0421722	-3.76427
ENSG00000016864	GLT8D1	-0.165131	0.0552616	-0.906615	0.365545	0.506964	-6.21557
ENSG00000017260	ATP2C1	0.0406994	2.08455	0.275912	0.78286	0.855609	-6.86232
ENSG00000017483	SLC38A5	1.016	-0.498994	3.33016	0.00100874	0.00522635	-1.08545
ENSG00000017797	RALBP1	-0.198656	1.59237	-1.91886	0.0562215	0.124091	-5.05512
ENSG00000018189	RUFY3	-0.242133	1.50718	-1.54068	0.124748	0.22796	-5.69264
ENSG00000018280	SLC11A1	-0.611534	6.27761	-3.65602	0.000316513	0.0020458	-0.463301
ENSG00000018510	AGPS	-0.292485	0.782896	-1.96137	0.051025	0.115389	-4.88641
ENSG00000019144	PHLDB1	-0.248794	0.307792	-1.12283	0.262663	0.399063	-6.07661
ENSG00000019169	MARCO	-1.78303	2.89603	-6.9754	3.117e-11	1.65858e-09	15.0241
ENSG00000019582	CD74	-0.61992	7.05585	-2.64338	0.00876432	0.0295061	-3.48937
ENSG00000020577	SAMD4A	0.0837664	0.454353	0.347361	0.728633	0.815446	-6.63988
ENSG00000020633	RUNX3	0.69069	1.714	3.65565	0.000316933	0.00204717	-0.37995
ENSG00000020922	MRE11	-0.0461353	0.129463	-0.305249	0.760449	0.839316	-6.59058
ENSG00000021355	SERPINB1	0.564294	5.78555	4.39352	1.69292e-05	0.000184758	2.28131
ENSG00000021574	SPAST	0.196905	1.35143	1.7449	0.082319	0.166396	-5.32232
ENSG00000021762	OSBPL5	-0.269268	0.399057	-1.23135	0.219431	0.348681	-5.95775
ENSG00000022277	RTF2	0.213952	3.42552	1.72982	0.0849844	0.17028	-5.46829
ENSG00000022556	NLRP2	-0.0878795	0.238854	-0.370073	0.711664	0.800975	-6.58554
ENSG00000022567	SLC45A4	0.216378	2.58297	1.28754	0.19918	0.323766	-6.10044
ENSG00000022840	RNF10	0.280568	4.45909	2.30222	0.022204	0.0607494	-4.3447
ENSG00000023041	ZDHHC6	0.0610838	0.947506	0.398969	0.690281	0.783119	-6.68521
ENSG00000023171	GRAMD1B	1.01765	0.929619	4.815	2.64688e-06	3.86587e-05	4.23905
ENSG00000023191	RNH1	-0.697086	2.96933	-4.62895	6.10029e-06	7.68902e-05	3.24952
ENSG00000023228	NDUFS1	-0.311066	1.00893	-2.09871	0.036917	0.090252	-4.6445
ENSG00000023287	RB1CC1	0.304963	1.65086	2.41972	0.0162975	0.0475638	-3.97989
ENSG00000023318	ERP44	0.526764	0.891405	3.35347	0.000931063	0.00488821	-1.28664
ENSG00000023330	ALAS1	-0.298014	2.01383	-1.85685	0.064592	0.138347	-5.20731
ENSG00000023445	BIRC3	0.950245	1.97743	5.28451	2.88998e-07	5.80591e-06	6.2436
ENSG00000023608	SNAPC1	0.27183	0.233733	1.37728	0.169746	0.287894	-5.70267
ENSG00000023697	DERA	0.00702286	0.148638	0.0386846	0.969175	0.981353	-6.61866
ENSG00000023734	STRAP	-0.198092	1.44412	-1.49731	0.135663	0.243388	-5.74247
ENSG00000023892	DEF6	0.27599	1.76206	1.74736	0.0818898	0.165767	-5.34858
ENSG00000023902	PLEKHO1	0.714376	2.39601	4.10094	5.68479e-05	0.000506894	1.17483
ENSG00000023909	GCLM	0.657616	1.76285	3.45423	0.000655289	0.00369411	-1.07083
ENSG00000024048	UBR2	0.284574	1.4858	2.32142	0.0211263	0.0583851	-4.18806
ENSG00000024862	CCDC28A	0.363285	0.423455	2.00597	0.0460139	0.106499	-4.67727
ENSG00000025039	RRAGD	0.227943	1.47813	1.47695	0.141038	0.250383	-5.75895
ENSG00000025293	PHF20	-0.0659543	2.42586	-0.466434	0.64134	0.748116	-6.81558
ENSG00000025434	NR1H3	0.143296	2.2565	0.664729	0.50688	0.637339	-6.6905
ENSG00000025708	TYMP	0.434265	6.35515	3.44555	0.000675652	0.00377454	-1.17474
ENSG00000025770	NCAPH2	-0.291055	0.829405	-2.02419	0.0440895	0.103014	-4.76489
ENSG00000025796	SEC63	-0.197015	1.79661	-1.26292	0.207878	0.334238	-6.09809
ENSG00000025800	KPNA6	0.0594605	0.680976	0.42182	0.673544	0.770525	-6.64197
ENSG00000026025	VIM	-0.426258	7.37636	-2.87516	0.00441148	0.0171308	-2.87084
ENSG00000026103	FAS	1.56473	2.36596	7.36791	2.97453e-12	2.04764e-10	17.3644
ENSG00000026297	RNASET2	0.186579	3.82667	1.26196	0.208223	0.334653	-6.16226
ENSG00000026508	CD44	-0.00994764	7.41707	-0.0724979	0.942268	0.964375	-6.90889
ENSG00000026652	AGPAT4	0.0743504	0.886383	0.428525	0.668664	0.76735	-6.66117
ENSG00000026751	SLAMF7	2.37151	4.07435	8.50185	2.24474e-15	3.15675e-13	24.3531
ENSG00000026950	BTN3A1	1.73487	1.86761	7.5313	1.0939e-12	8.47903e-11	18.3601
ENSG00000027075	PRKCH	0.035714	3.83433	0.173867	0.862121	0.910201	-6.93755
ENSG00000027697	IFNGR1	0.347754	4.11635	2.21559	0.0276852	0.0719274	-4.53533
ENSG00000027847	B4GALT7	-1.17637	-0.467131	-5.49173	1.03697e-07	2.39062e-06	7.36869
ENSG00000027869	SH2D2A	0.787522	-0.362645	2.93676	0.00364849	0.0148045	-2.27439
ENSG00000028116	VRK2	0.158998	1.117	1.11773	0.264833	0.40124	-6.1684
ENSG00000028137	TNFRSF1B	0.33184	5.63509	1.88624	0.0605048	0.131468	-5.18691
ENSG00000028203	VEZT	-0.0173445	1.10798	-0.122327	0.902745	0.938553	-6.79415
ENSG00000028277	POU2F2	-0.177665	1.68331	-0.832323	0.406077	0.546245	-6.53137
ENSG00000028310	BRD9	-0.390591	1.33797	-2.81166	0.00534776	0.0198654	-2.98836
ENSG00000028528	SNX1	0.291558	3.47424	1.8237	0.069477	0.146296	-5.30444
ENSG00000028839	TBPL1	1.77864	1.61028	6.25786	1.84971e-09	6.9234e-08	11.1824
ENSG00000029153	ARNTL2	0.914189	0.496728	4.40543	1.60933e-05	0.000177008	2.56453
ENSG00000029363	BCLAF1	0.310376	2.78308	2.75148	0.00639826	0.0228619	-3.22443
ENSG00000029364	SLC39A9	-0.0436271	0.700578	-0.373335	0.709238	0.7991	-6.6717
ENSG00000029725	RABEP1	0.0269789	1.39987	0.195902	0.844857	0.899597	-6.81733
ENSG00000029993	HMGB3	-0.4793	1.41738	-1.32127	0.187706	0.310083	-6.00195
ENSG00000030066	NUP160	0.177501	1.1958	1.05661	0.29178	0.430112	-6.24974
ENSG00000030110	BAK1	0.62598	0.360424	3.49362	0.000569965	0.00330043	-0.751856
ENSG00000030582	GRN	-0.229556	5.91176	-1.352	0.177683	0.297822	-6.03055
ENSG00000031003	FAM13B	0.221426	1.68525	1.89669	0.0591035	0.129206	-5.08647
ENSG00000031081	ARHGAP31	0.507378	0.899429	2.65555	0.00846356	0.0286898	-3.29305
ENSG00000031698	SARS1	-0.271807	1.14955	-2.17551	0.0305956	0.0780268	-4.49729
ENSG00000031823	RANBP3	-0.0887696	2.07108	-0.615253	0.538987	0.666154	-6.7164
ENSG00000032219	ARID4A	0.488289	1.63973	3.19649	0.00158344	0.00753015	-1.87143
ENSG00000032389	EIPR1	0.0639398	0.301616	0.360833	0.718551	0.806915	-6.58619
ENSG00000032444	PNPLA6	-0.691097	4.15536	-4.21427	3.58291e-05	0.000346465	1.56305
ENSG00000032742	IFT88	-0.277107	-0.375463	-1.53409	0.126362	0.230227	-5.40044
ENSG00000033030	ZCCHC8	0.124568	0.0885434	0.906007	0.365867	0.507195	-6.20684
ENSG00000033050	ABCF2	-0.609521	-0.384065	-2.6916	0.00762579	0.0265729	-3.05364
ENSG00000033100	CHPF2	0.139559	0.955064	1.07035	0.285566	0.423503	-6.2098
ENSG00000033170	FUT8	-0.101051	0.199167	-0.391777	0.69558	0.78786	-6.5933
ENSG00000033178	UBA6	0.366664	1.87519	2.07329	0.0392424	0.094312	-4.75297
ENSG00000033327	GAB2	0.0481517	3.34463	0.336643	0.736688	0.821752	-6.89198
ENSG00000033627	ATP6V0A1	-0.0673621	2.94841	-0.456885	0.648178	0.752478	-6.8384
ENSG00000033800	PIAS1	0.387497	2.70292	2.97111	0.0032775	0.0136191	-2.6153
ENSG00000033867	SLC4A7	-0.453529	-0.0195471	-2.57243	0.0107184	0.0345101	-3.40913
ENSG00000034152	MAP2K3	-0.103988	4.77544	-0.680806	0.496669	0.628528	-6.71998
ENSG00000034239	EFCAB1	-1.17281	-0.579339	-4.40472	1.61415e-05	0.000177341	2.59654
ENSG00000034510	TMSB10	0.340743	6.88179	1.94729	0.0526994	0.118306	-5.0532
ENSG00000034677	RNF19A	0.0955074	2.5983	0.71291	0.476613	0.610371	-6.67451
ENSG00000034713	GABARAPL2	0.404378	3.74194	2.69439	0.00756415	0.0263861	-3.3931
ENSG00000035115	SH3YL1	-0.687359	0.157772	-3.47268	0.000613937	0.00350557	-0.878224
ENSG00000035403	VCL	-0.0218698	0.912292	-0.142329	0.886943	0.926668	-6.76192
ENSG00000035664	DAPK2	-0.253975	0.873207	-1.34071	0.181319	0.302372	-5.89815
ENSG00000035681	NSMAF	0.668033	3.68654	3.97562	9.36367e-05	0.000760528	0.660883
ENSG00000035687	ADSS2	-0.0784804	0.976832	-0.591955	0.554453	0.679875	-6.61397
ENSG00000035862	TIMP2	-0.325127	3.00272	-2.20565	0.028384	0.0734523	-4.54939
ENSG00000035928	RFC1	0.204649	1.43664	1.1799	0.239242	0.372383	-6.14321
ENSG00000036054	TBC1D23	0.450925	0.983351	2.85722	0.00465947	0.0178541	-2.77553
ENSG00000036257	CUL3	0.14188	2.75971	1.08057	0.281005	0.418742	-6.3532
ENSG00000036549	AC118549.1	-0.316187	-0.131401	-1.43097	0.153776	0.267403	-5.5962
ENSG00000037241	RPL26L1	-0.522158	0.0798403	-2.23872	0.0261173	0.0687797	-4.21883
ENSG00000037474	NSUN2	-0.273686	0.861046	-2.13207	0.0340461	0.08472	-4.55018
ENSG00000037637	FBXO42	-0.401933	0.0444914	-3.2659	0.00125515	0.00623394	-1.49515
ENSG00000037749	MFAP3	0.14542	0.996738	0.990469	0.322971	0.463188	-6.29399
ENSG00000037897	METTL1	-0.540622	-0.625316	-2.44418	0.0152597	0.0452186	-3.61157
ENSG00000038210	PI4K2B	1.30352	0.473279	5.06335	8.3592e-07	1.44112e-05	5.40001
ENSG00000038219	BOD1L1	0.26942	2.46072	1.85879	0.0643154	0.137845	-5.20904
ENSG00000038274	MAT2B	0.706212	1.97909	4.8766	1.99676e-06	3.04943e-05	4.38241
ENSG00000038358	EDC4	0.154981	1.29938	1.04407	0.297532	0.436318	-6.28092
ENSG00000038382	TRIO	-0.304481	2.6642	-2.03296	0.0431886	0.101467	-4.89944
ENSG00000038427	VCAN	0.118438	4.29492	0.460208	0.645795	0.750752	-6.84759
ENSG00000038532	CLEC16A	-0.0217083	1.12991	-0.160229	0.872839	0.917679	-6.7916
ENSG00000038945	MSR1	-1.26091	2.96004	-4.93593	1.51822e-06	2.37984e-05	4.57741
ENSG00000039068	CDH1	-1.04505	0.693422	-4.14669	4.72386e-05	0.000437231	1.42775
ENSG00000039123	MTREX	-0.218746	0.817811	-1.36321	0.17413	0.293156	-5.84942
ENSG00000039319	ZFYVE16	0.495579	3.23878	2.79321	0.0056519	0.0207679	-3.12309
ENSG00000039523	RIPOR1	-0.113731	2.48236	-0.757902	0.449274	0.586325	-6.64249
ENSG00000039560	RAI14	-1.01567	-0.531772	-4.58951	7.25827e-06	8.9467e-05	3.35512
ENSG00000039650	PNKP	-0.514116	2.53786	-2.66948	0.00813049	0.0278873	-3.44125
ENSG00000040341	STAU2	0.125414	1.82395	0.823642	0.410984	0.550888	-6.54269
ENSG00000040487	SLC66A1	-0.134003	-0.0273663	-0.882365	0.378487	0.519714	-6.2185
ENSG00000040531	CTNS	0.454145	1.32648	2.72548	0.00690733	0.0244413	-3.17156
ENSG00000040633	PHF23	0.0955963	2.02309	0.64111	0.52208	0.651458	-6.69005
ENSG00000040933	INPP4A	0.109923	1.89774	0.738111	0.461188	0.59598	-6.61189
ENSG00000041357	PSMA4	1.04021	3.13824	5.25626	3.31595e-07	6.54152e-06	6.05766
ENSG00000041802	LSG1	-0.0956237	0.208608	-0.569845	0.569331	0.691315	-6.50118
ENSG00000042062	RIPOR3	0.794394	0.466758	3.93127	0.000111403	0.00086903	0.766512
ENSG00000042088	TDP1	-0.185473	-0.0613381	-0.979844	0.328178	0.468369	-6.13069
ENSG00000042429	MED17	0.121688	1.2536	1.24217	0.215419	0.343526	-6.04765
ENSG00000042445	RETSAT	-0.216402	0.624582	-1.62739	0.105002	0.200513	-5.43805
ENSG00000042493	CAPG	-0.470601	4.30981	-3.16837	0.00173778	0.00813756	-2.06193
ENSG00000042753	AP2S1	-0.386708	2.56002	-2.23692	0.026237	0.0690395	-4.47192
ENSG00000042832	TG	-0.0637877	1.02788	-0.256475	0.79781	0.866035	-6.76694
ENSG00000042980	ADAM28	0.547176	0.585996	2.45272	0.0149113	0.0443331	-3.71681
ENSG00000043093	DCUN1D1	0.111495	1.0817	0.712933	0.476599	0.610371	-6.54058
ENSG00000043143	JADE2	0.0521574	0.605259	0.29402	0.769004	0.845597	-6.67474
ENSG00000043462	LCP2	0.623597	6.91395	4.71938	4.078e-06	5.49916e-05	3.65115
ENSG00000044115	CTNNA1	-0.29583	4.03511	-2.59441	0.0100752	0.0327651	-3.65136
ENSG00000044446	PHKA2	-0.0396587	1.06524	-0.218702	0.827073	0.886897	-6.77625
ENSG00000044574	HSPA5	-0.272792	3.87764	-1.65634	0.0989962	0.191375	-5.59599
ENSG00000046651	OFD1	-0.190993	0.143004	-1.08484	0.279111	0.416867	-6.07293
ENSG00000047056	WDR37	0.112801	1.34164	0.751836	0.452907	0.589738	-6.54408
ENSG00000047188	YTHDC2	0.448564	0.549711	2.95299	0.00346867	0.014257	-2.44671
ENSG00000047249	ATP6V1H	0.275664	2.50045	2.01542	0.0450072	0.104765	-4.91517
ENSG00000047315	POLR2B	0.0776525	1.23218	0.599158	0.549649	0.675583	-6.6319
ENSG00000047346	FAM214A	0.0438306	0.850062	0.274223	0.784156	0.856293	-6.72439
ENSG00000047365	ARAP2	1.15518	2.1587	6.06701	5.21606e-09	1.72885e-07	10.1087
ENSG00000047410	TPR	0.22581	2.15278	1.7194	0.086868	0.173208	-5.43801
ENSG00000047457	CP	-0.212755	0.655741	-0.76689	0.443922	0.581422	-6.4609
ENSG00000047578	KIAA0556	-0.338064	1.49872	-2.32848	0.0207416	0.0575956	-4.20368
ENSG00000047579	DTNBP1	0.919288	1.59532	5.97364	8.59344e-09	2.66018e-07	9.65528
ENSG00000047621	C12orf4	-0.0753809	0.592561	-0.39181	0.695556	0.78786	-6.65139
ENSG00000047644	WWC3	0.0610735	0.65722	0.46331	0.643574	0.749478	-6.61608
ENSG00000047849	MAP4	-0.272078	1.64657	-2.34245	0.0199988	0.0558807	-4.17672
ENSG00000048052	HDAC9	-0.403217	-0.0381207	-1.76894	0.0782104	0.160381	-5.10453
ENSG00000048342	CC2D2A	0.488715	3.32061	2.59701	0.0100014	0.0326005	-3.6346
ENSG00000048392	RRM2B	-0.177813	1.23956	-1.00697	0.31499	0.45479	-6.33134
ENSG00000048405	ZNF800	0.0160703	0.835094	0.120307	0.904344	0.939266	-6.75942
ENSG00000048471	SNX29	-0.159018	1.04785	-1.03712	0.300752	0.439715	-6.27146
ENSG00000048649	RSF1	0.305442	2.15967	2.45801	0.014699	0.043861	-3.93195
ENSG00000048707	VPS13D	0.334916	1.96333	1.96577	0.0505103	0.114531	-4.97603
ENSG00000048740	CELF2	0.319918	2.73366	2.52319	0.0122951	0.038242	-3.8023
ENSG00000048828	FAM120A	-0.0973051	2.51585	-0.84493	0.399015	0.539918	-6.57307
ENSG00000048991	R3HDM1	-0.17671	1.42197	-0.938259	0.349081	0.489203	-6.41583
ENSG00000049089	COL9A2	-0.398066	0.115808	-1.58409	0.114527	0.214091	-5.42815
ENSG00000049239	H6PD	-0.149181	0.554736	-1.32677	0.18588	0.307686	-5.8575
ENSG00000049245	VAMP3	0.411639	3.37974	2.1648	0.0314173	0.0796204	-4.63606
ENSG00000049540	ELN	-0.654935	0.71667	-2.54642	0.0115273	0.0364167	-3.61739
ENSG00000049541	RFC2	-0.144358	0.414636	-0.843817	0.399636	0.540386	-6.34548
ENSG00000049618	ARID1B	-0.1325	2.00489	-1.09451	0.274859	0.412142	-6.30732
ENSG00000049656	CLPTM1L	-0.205332	2.97414	-1.52097	0.129622	0.234601	-5.79894
ENSG00000049759	NEDD4L	-0.782761	1.22285	-3.60526	0.000381238	0.00239649	-0.573033
ENSG00000049860	HEXB	-0.437371	3.34715	-2.86296	0.0045788	0.0176	-2.94287
ENSG00000050130	JKAMP	0.0930991	0.825631	0.557453	0.577752	0.697497	-6.59458
ENSG00000050327	ARHGEF5	-1.36349	-0.555568	-7.38302	2.71317e-12	1.88087e-10	17.5038
ENSG00000050344	NFE2L3	0.759751	1.7724	3.71077	0.000258363	0.00173606	-0.19737
ENSG00000050405	LIMA1	-0.674858	0.100404	-3.55682	0.000454465	0.00274801	-0.589445
ENSG00000050426	LETMD1	-0.318482	0.600762	-1.88972	0.0600342	0.130805	-4.9887
ENSG00000050438	SLC4A8	-1.08936	-0.136641	-5.3552	2.04382e-07	4.36428e-06	6.69375
ENSG00000050730	TNIP3	0.749147	3.05338	2.08016	0.0386019	0.0932052	-4.79543
ENSG00000050748	MAPK9	-0.39393	0.442862	-2.13754	0.0335938	0.0838558	-4.49012
ENSG00000050820	BCAR1	-2.20391	-0.161242	-9.13741	3.18364e-17	6.81299e-15	28.5221
ENSG00000051009	FAM160A2	-0.178995	1.59341	-1.08457	0.27923	0.416941	-6.28279
ENSG00000051108	HERPUD1	0.36965	3.14624	2.31194	0.0216524	0.0595049	-4.31127
ENSG00000051128	HOMER3	-0.0752768	1.30821	-0.446677	0.655522	0.757034	-6.7348
ENSG00000051382	PIK3CB	0.00500601	1.48827	0.0348518	0.972228	0.983012	-6.84944
ENSG00000051523	CYBA	-0.10824	6.44817	-0.770914	0.441538	0.579455	-6.63231
ENSG00000051596	THOC3	-0.389534	0.261552	-1.52932	0.12754	0.231813	-5.53885
ENSG00000051620	HEBP2	-0.12076	1.34552	-0.724538	0.469461	0.604338	-6.5813
ENSG00000051825	MPHOSPH9	-0.227965	0.0915108	-0.998427	0.319106	0.459187	-6.14685
ENSG00000052126	PLEKHA5	-0.672305	-0.211466	-3.12728	0.00198853	0.00905833	-1.88952
ENSG00000052344	PRSS8	-0.576899	-0.112722	-2.55913	0.0111256	0.0355586	-3.43403
ENSG00000052723	SIKE1	0.45489	0.282415	2.09442	0.0373015	0.090935	-4.45949
ENSG00000052749	RRP12	-0.268669	2.01631	-1.64512	0.101292	0.195054	-5.56629
ENSG00000052795	FNIP2	0.834917	3.00144	4.69291	4.59095e-06	6.11547e-05	3.53901
ENSG00000052802	MSMO1	-0.648135	0.0123887	-3.46657	0.000627362	0.00357393	-0.859074
ENSG00000052841	TTC17	0.255085	1.38359	1.90006	0.0586579	0.128467	-5.04681
ENSG00000053254	FOXN3	-0.116623	2.86566	-0.812141	0.417538	0.557775	-6.61311
ENSG00000053371	AKR7A2	-0.934034	-0.36607	-4.84802	2.27654e-06	3.411e-05	4.43157
ENSG00000053501	USE1	-0.307703	0.679853	-1.92748	0.0551331	0.122457	-4.93638
ENSG00000053524	MCF2L2	0.00649551	0.565992	0.029384	0.976583	0.984786	-6.71116
ENSG00000053770	AP5M1	0.161565	0.668308	1.09302	0.27551	0.412867	-6.1322
ENSG00000053900	ANAPC4	-0.0956929	0.425783	-0.583417	0.560176	0.68442	-6.53517
ENSG00000053918	KCNQ1	-0.309005	0.711816	-1.90851	0.057552	0.126404	-4.96751
ENSG00000054116	TRAPPC3	-0.0810361	1.41438	-0.548051	0.584181	0.702986	-6.69525
ENSG00000054118	THRAP3	0.137499	2.46119	1.20874	0.227984	0.359564	-6.19562
ENSG00000054148	PHPT1	-0.560867	0.478108	-2.22488	0.0270459	0.0706524	-4.32951
ENSG00000054267	ARID4B	1.00549	3.29359	5.82923	1.84045e-08	5.23625e-07	8.83994
ENSG00000054277	OPN3	-1.21456	0.26438	-6.95271	3.56175e-11	1.85513e-09	14.9866
ENSG00000054282	SDCCAG8	-0.10673	1.71573	-0.732901	0.464354	0.599253	-6.60858
ENSG00000054523	KIF1B	0.496325	2.45079	3.89456	0.000128486	0.000973688	0.397079
ENSG00000054611	TBC1D22A	-0.114593	1.29458	-1.05223	0.293784	0.432224	-6.28488
ENSG00000054654	SYNE2	-0.479274	2.35778	-2.95339	0.00346429	0.0142509	-2.66971
ENSG00000054965	FAM168A	0.29408	1.57723	1.991	0.047647	0.109522	-4.89
ENSG00000054967	RELT	-0.413116	2.98467	-2.53482	0.011905	0.0373346	-3.79214
ENSG00000054983	GALC	0.507899	3.02993	3.73917	0.000232323	0.0015915	-0.180647
ENSG00000055044	NOP58	0.0444688	1.02793	0.258798	0.796019	0.864807	-6.76076
ENSG00000055070	SZRD1	0.1594	2.55351	1.28921	0.198601	0.323092	-6.0999
ENSG00000055130	CUL1	0.87638	1.39974	5.03918	9.36912e-07	1.57928e-05	5.16625
ENSG00000055147	FAM114A2	0.367553	0.522964	1.97126	0.0498757	0.113468	-4.77334
ENSG00000055163	CYFIP2	-0.425325	3.18326	-2.65922	0.00837443	0.0284956	-3.48332
ENSG00000055208	TAB2	0.485024	3.03303	3.65765	0.000314612	0.00203887	-0.464613
ENSG00000055211	GINM1	-0.235751	0.0352519	-1.46784	0.143493	0.25378	-5.56661
ENSG00000055332	EIF2AK2	2.18073	3.10359	9.92672	1.33815e-19	4.54231e-17	33.8859
ENSG00000055483	AC022966.1	-0.36979	2.09142	-2.5337	0.0119424	0.0374161	-3.76456
ENSG00000055609	KMT2C	0.0105414	2.76369	0.095086	0.924328	0.952983	-6.93077
ENSG00000055917	PUM2	0.390509	2.19928	3.28322	0.00118373	0.00595771	-1.65743
ENSG00000055950	MRPL43	-0.437021	0.124959	-2.35073	0.0195699	0.0549161	-3.96207
ENSG00000055955	ITIH4	0.490893	0.459912	2.07997	0.0386199	0.0932149	-4.52611
ENSG00000056097	ZFR	0.0158763	1.52965	0.155105	0.876872	0.92015	-6.84244
ENSG00000056558	TRAF1	0.885827	2.14137	3.24128	0.00136359	0.00665502	-1.76067
ENSG00000056586	RC3H2	-0.2129	1.59103	-1.35758	0.175908	0.29545	-5.96139
ENSG00000056972	TRAF3IP2	-0.356243	1.09503	-2.16035	0.0317637	0.0803809	-4.52521
ENSG00000057019	DCBLD2	-0.452507	-0.350289	-1.78908	0.0748988	0.155385	-5.01129
ENSG00000057149	SERPINB3	-0.15945	0.838876	-0.430547	0.667195	0.766468	-6.69624
ENSG00000057252	SOAT1	-0.242409	1.93927	-1.33494	0.183197	0.304833	-6.01542
ENSG00000057608	GDI2	0.094781	3.26704	0.836525	0.403715	0.544124	-6.59853
ENSG00000057657	PRDM1	1.18757	2.201	6.14539	3.41648e-09	1.20978e-07	10.5204
ENSG00000057663	ATG5	0.23672	0.473056	1.47246	0.142242	0.251841	-5.61627
ENSG00000057704	TMCC3	-0.177766	1.86253	-0.881095	0.379173	0.520437	-6.5034
ENSG00000057757	PITHD1	-0.385237	0.165639	-2.88805	0.00424067	0.0166647	-2.62003
ENSG00000058063	ATP11B	0.60015	3.77842	3.81067	0.000177317	0.00126762	0.0590653
ENSG00000058091	CDK14	0.0791788	1.28858	0.448594	0.654141	0.756293	-6.72316
ENSG00000058262	SEC61A1	0.0266766	2.29725	0.206161	0.836845	0.89341	-6.89078
ENSG00000058272	PPP1R12A	0.391544	3.85025	2.9912	0.0030769	0.0129662	-2.58283
ENSG00000058453	CROCC	-0.827694	1.49968	-4.18321	4.07011e-05	0.000384143	1.50055
ENSG00000058600	POLR3E	-0.426364	0.52426	-2.48741	0.0135672	0.0413356	-3.71279
ENSG00000058668	ATP2B4	-0.00500585	1.70708	-0.0320311	0.974475	0.983967	-6.86778
ENSG00000058673	ZC3H11A	0.521847	2.41215	3.95552	0.000101325	0.000807648	0.622807
ENSG00000058799	YIPF1	0.590112	1.30321	4.06326	6.61338e-05	0.000570826	1.12868
ENSG00000059122	FLYWCH1	-0.645277	0.436209	-3.43895	0.00069151	0.00384628	-1.02573
ENSG00000059145	UNKL	0.0836691	1.37583	0.447936	0.654615	0.756519	-6.73169
ENSG00000059377	TBXAS1	0.0984737	3.91527	0.603816	0.546552	0.673122	-6.77157
ENSG00000059378	PARP12	2.00069	3.5522	8.50544	2.19231e-15	3.12769e-13	24.3798
ENSG00000059728	MXD1	0.605172	6.27516	3.83068	0.00016428	0.00119022	0.142158
ENSG00000059758	CDK17	0.795368	2.26544	4.73723	3.76376e-06	5.15305e-05	3.76171
ENSG00000059804	SLC2A3	0.0356608	6.11652	0.209799	0.834007	0.891419	-6.91251
ENSG00000059915	PSD	0.173062	0.503239	0.755538	0.450688	0.587703	-6.39495
ENSG00000060069	CTDP1	0.108136	2.13139	0.711513	0.477477	0.611141	-6.64841
ENSG00000060138	YBX3	-0.319421	3.70383	-2.32356	0.0210089	0.0581259	-4.29676
ENSG00000060237	WNK1	-0.317642	3.72766	-3.00904	0.00290821	0.0124328	-2.53304
ENSG00000060339	CCAR1	-0.0302398	1.59944	-0.205751	0.837165	0.893436	-6.84221
ENSG00000060491	OGFR	0.633303	3.06688	4.06088	6.67661e-05	0.000575522	0.991838
ENSG00000060558	GNA15	-0.0762699	2.47114	-0.554032	0.580087	0.69963	-6.77142
ENSG00000060642	PIGV	0.36941	-0.20273	1.76635	0.0786443	0.160985	-4.98893
ENSG00000060656	PTPRU	-0.659906	-0.486843	-2.5185	0.0124556	0.0386546	-3.48432
ENSG00000060688	SNRNP40	-0.547429	0.139353	-3.0229	0.00278312	0.0119742	-2.2414
ENSG00000060762	MPC1	-0.205016	0.328858	-1.06682	0.287157	0.42476	-6.13072
ENSG00000060971	ACAA1	-0.203079	2.9399	-1.50112	0.134676	0.242146	-5.82782
ENSG00000060982	BCAT1	-0.182297	1.94382	-1.164	0.245614	0.379142	-6.22588
ENSG00000061273	HDAC7	-0.409778	2.46564	-3.40376	0.000782136	0.00425721	-1.30657
ENSG00000061936	SFSWAP	-0.0579953	1.53233	-0.451148	0.652301	0.755063	-6.75482
ENSG00000061938	TNK2	0.597574	2.44063	3.59896	0.000390099	0.00243727	-0.637218
ENSG00000061987	MON2	0.0908042	1.49491	0.72182	0.471127	0.605454	-6.58408
ENSG00000062038	CDH3	-0.691252	-0.653103	-3.10131	0.0021638	0.00967322	-1.87186
ENSG00000062194	GPBP1	0.85307	3.0605	5.53589	8.30473e-08	1.95578e-06	7.38806
ENSG00000062282	DGAT2	-0.0895224	3.55975	-0.426365	0.670235	0.768398	-6.86099
ENSG00000062485	CS	-0.49761	2.22239	-5.02134	1.01895e-06	1.68859e-05	4.97909
ENSG00000062582	MRPS24	-0.211433	1.02256	-1.08566	0.27875	0.416453	-6.22517
ENSG00000062598	ELMO2	0.66557	2.37582	4.13479	4.95755e-05	0.000453973	1.30424
ENSG00000062650	WAPL	0.142923	1.34776	1.05496	0.292537	0.430929	-6.27433
ENSG00000062716	VMP1	0.311784	5.37905	2.27454	0.0238421	0.0641437	-4.40031
ENSG00000062725	APPBP2	-0.0451859	0.651414	-0.326943	0.744004	0.827673	-6.68469
ENSG00000062822	POLD1	-0.356042	0.00338512	-2.00566	0.0460469	0.106499	-4.66966
ENSG00000063015	SEZ6	0.427856	-0.331724	1.66847	0.0965637	0.187564	-5.12491
ENSG00000063046	EIF4B	-0.480758	2.93824	-4.15746	4.5212e-05	0.000422666	1.34787
ENSG00000063169	BICRA	-0.209372	0.187387	-1.26834	0.205941	0.331851	-5.85221
ENSG00000063177	RPL18	-0.288255	4.30792	-1.76975	0.0780737	0.160183	-5.40448
ENSG00000063241	ISOC2	-0.7061	0.260687	-3.28084	0.00119333	0.00599651	-1.51225
ENSG00000063244	U2AF2	-0.326557	2.87086	-2.25364	0.0251475	0.0669395	-4.44325
ENSG00000063245	EPN1	-0.252544	2.15895	-1.9258	0.0553446	0.122788	-5.08393
ENSG00000063322	MED29	-0.072387	1.47591	-0.565531	0.572256	0.69384	-6.6864
ENSG00000063601	MTMR1	0.165647	0.697172	1.03934	0.299723	0.438699	-6.1925
ENSG00000063854	HAGH	-0.685879	0.934868	-4.40591	1.60605e-05	0.000176864	2.42906
ENSG00000063978	RNF4	-0.037826	1.824	-0.282623	0.777716	0.851866	-6.84479
ENSG00000064012	CASP8	0.547235	2.57314	3.71231	0.000256881	0.00172964	-0.256613
ENSG00000064115	TM7SF3	-0.0868172	1.38698	-0.44914	0.653748	0.756227	-6.7439
ENSG00000064225	ST3GAL6	0.394718	2.29826	2.13844	0.0335195	0.0837264	-4.6503
ENSG00000064270	ATP2C2	-1.16553	0.544923	-4.81209	2.68221e-06	3.9001e-05	4.15702
ENSG00000064313	TAF2	-0.0796125	1.02683	-0.530705	0.596128	0.712896	-6.65907
ENSG00000064393	HIPK2	-0.408383	1.54491	-2.75935	0.00625104	0.0224581	-3.1483
ENSG00000064419	TNPO3	0.301688	0.963663	2.26858	0.0242083	0.0649321	-4.23514
ENSG00000064490	RFXANK	0.153611	1.31101	0.930827	0.352905	0.493185	-6.39228
ENSG00000064547	LPAR2	0.0978855	3.08879	0.481587	0.63055	0.739631	-6.82767
ENSG00000064601	CTSA	-0.0705805	4.07316	-0.467856	0.640324	0.747286	-6.84446
ENSG00000064607	SUGP2	-0.451715	0.735511	-3.67251	0.000297812	0.00195574	-0.276938
ENSG00000064666	CNN2	0.0540653	5.20341	0.486366	0.627164	0.736994	-6.82972
ENSG00000064687	ABCA7	-0.374197	2.20953	-2.50603	0.0128913	0.0396815	-3.83891
ENSG00000064726	BTBD1	-0.44539	1.67964	-2.46714	0.0143387	0.0431785	-3.90273
ENSG00000064763	FAR2	0.342361	1.9995	2.4161	0.0164564	0.0479422	-4.01805
ENSG00000064886	CHI3L2	0.239546	-0.205391	1.06656	0.287275	0.424806	-5.96424
ENSG00000064932	SBNO2	0.289327	5.10859	2.18476	0.0299017	0.0765494	-4.5983
ENSG00000064961	HMG20B	-0.583812	1.04723	-4.09458	5.83227e-05	0.000516893	1.20362
ENSG00000064995	TAF11	0.0459315	0.0495589	0.350873	0.726	0.813146	-6.54494
ENSG00000064999	ANKS1A	-0.133634	0.887215	-1.0519	0.293935	0.432381	-6.22798
ENSG00000065000	AP3D1	-0.0875001	2.74121	-0.884066	0.37757	0.519251	-6.5482
ENSG00000065029	ZNF76	-0.368611	0.234755	-2.52784	0.0121381	0.0379203	-3.56452
ENSG00000065054	SLC9A3R2	-0.957551	0.211503	-3.77695	0.00020151	0.00141287	0.12619
ENSG00000065135	GNAI3	0.393893	1.38976	3.03363	0.0026897	0.0116846	-2.33073
ENSG00000065150	IPO5	-0.565592	0.664348	-3.28671	0.00116981	0.00590845	-1.5378
ENSG00000065154	OAT	-0.240661	1.25698	-1.49987	0.134999	0.242664	-5.7284
ENSG00000065243	PKN2	0.286492	1.50176	1.81478	0.0708409	0.148706	-5.21051
ENSG00000065268	WDR18	-0.680574	-0.0534713	-3.26638	0.00125314	0.00623248	-1.50559
ENSG00000065357	DGKA	0.188798	3.2805	1.17535	0.241052	0.374454	-6.25951
ENSG00000065361	ERBB3	-0.44709	1.27185	-1.59334	0.112437	0.210865	-5.59788
ENSG00000065413	ANKRD44	0.455147	3.16284	2.48216	0.0137635	0.0418818	-3.91388
ENSG00000065427	KARS1	0.64723	2.07163	3.80897	0.000178468	0.00127415	0.118497
ENSG00000065457	ADAT1	0.296049	1.89579	1.57075	0.117595	0.218539	-5.65538
ENSG00000065518	NDUFB4	-0.340905	1.96275	-1.785	0.0755596	0.156361	-5.32501
ENSG00000065526	SPEN	-0.147787	1.5574	-1.27301	0.20428	0.329769	-6.05946
ENSG00000065548	ZC3H15	0.173985	1.70345	1.39941	0.163017	0.279702	-5.89631
ENSG00000065559	MAP2K4	-0.0678732	1.19485	-0.427282	0.669568	0.768029	-6.72917
ENSG00000065600	PACC1	0.166765	-0.31961	0.837231	0.403319	0.543724	-6.16095
ENSG00000065613	SLK	0.399165	2.1421	2.64593	0.00870064	0.0293319	-3.46108
ENSG00000065615	CYB5R4	0.56789	2.88813	3.70605	0.000262943	0.00176442	-0.290259
ENSG00000065621	GSTO2	-0.0509938	0.499144	-0.287893	0.773684	0.848697	-6.66756
ENSG00000065665	SEC61A2	-0.199118	-0.180874	-0.84515	0.398892	0.539901	-6.22018
ENSG00000065717	TLE2	-1.02432	-0.768471	-4.23844	3.24301e-05	0.000319135	1.97529
ENSG00000065802	ASB1	-0.141115	0.183939	-0.831367	0.406616	0.546746	-6.30967
ENSG00000065809	FAM107B	-0.00114756	4.05378	-0.00873499	0.993038	0.995364	-6.95318
ENSG00000065882	TBC1D1	0.0532769	2.83363	0.457556	0.647697	0.752411	-6.83261
ENSG00000065883	CDK13	0.0191359	1.87787	0.185194	0.853238	0.904895	-6.86993
ENSG00000065911	MTHFD2	0.793019	2.80394	5.31702	2.46529e-07	5.0877e-06	6.34629
ENSG00000065923	SLC9A7	-0.342602	-0.472491	-1.60787	0.109216	0.206357	-5.25756
ENSG00000065970	FOXJ2	-0.242827	-0.0550805	-1.9725	0.0497335	0.113302	-4.7022
ENSG00000065978	YBX1	-0.991667	4.2756	-5.96103	9.1891e-09	2.80054e-07	9.49806
ENSG00000065989	PDE4A	-0.061911	1.3643	-0.437542	0.662123	0.762421	-6.73916
ENSG00000066027	PPP2R5A	0.339774	1.49673	2.36922	0.0186407	0.0528511	-4.07675
ENSG00000066044	ELAVL1	-0.382563	0.544554	-2.3621	0.0189935	0.0535584	-4.01343
ENSG00000066084	DIP2B	0.653664	2.11486	4.62164	6.30052e-06	7.91493e-05	3.27832
ENSG00000066117	SMARCD1	-0.0606557	0.894167	-0.447258	0.655103	0.756817	-6.67357
ENSG00000066135	KDM4A	0.0766788	0.177691	0.489218	0.625147	0.735414	-6.49786
ENSG00000066136	NFYC	0.11763	2.49686	1.03143	0.303407	0.441891	-6.39265
ENSG00000066294	CD84	0.99749	1.20178	4.13662	4.92088e-05	0.000451035	1.43755
ENSG00000066322	ELOVL1	-0.0167357	2.0034	-0.135969	0.891963	0.930629	-6.88401
ENSG00000066336	SPI1	0.024541	6.23421	0.214828	0.830089	0.888678	-6.90973
ENSG00000066379	ZNRD1	0.180654	-0.120052	0.844436	0.399291	0.540068	-6.21214
ENSG00000066422	ZBTB11	0.0221281	0.155365	0.159878	0.873115	0.917871	-6.62365
ENSG00000066427	ATXN3	-0.14043	1.37129	-0.838315	0.402712	0.54309	-6.49854
ENSG00000066455	GOLGA5	0.406898	0.372482	2.22563	0.0269949	0.0705624	-4.2269
ENSG00000066629	EML1	-1.03679	-0.261163	-4.48101	1.164e-05	0.000134331	2.86643
ENSG00000066654	THUMPD1	-0.306661	0.392277	-2.06247	0.0402701	0.0960783	-4.62131
ENSG00000066739	ATG2B	-0.0291817	-0.0649619	-0.151921	0.879381	0.921702	-6.56785
ENSG00000066777	ARFGEF1	0.157016	1.8776	1.38481	0.167432	0.285354	-5.93264
ENSG00000066827	ZFAT	0.088968	0.0821381	0.473643	0.636197	0.743653	-6.50631
ENSG00000066855	MTFR1	-0.066455	0.800881	-0.306336	0.759622	0.838498	-6.71989
ENSG00000066923	STAG3	-0.197192	1.14275	-1.16297	0.246031	0.379672	-6.1536
ENSG00000066933	MYO9A	-0.330357	0.37964	-1.8558	0.0647427	0.13858	-5.01771
ENSG00000067048	DDX3Y	0.269636	0.887766	1.32529	0.18637	0.308263	-5.84357
ENSG00000067057	PFKP	-0.105763	1.72652	-0.61658	0.538113	0.665392	-6.69174
ENSG00000067064	IDI1	0.805265	2.60011	4.28339	2.69107e-05	0.000273102	1.87518
ENSG00000067066	SP100	1.23294	4.9925	10.1928	2.03146e-20	8.33238e-18	35.7343
ENSG00000067082	KLF6	0.451304	5.68846	3.71169	0.000257476	0.00173128	-0.285992
ENSG00000067167	TRAM1	0.145049	2.26738	0.959698	0.3382	0.478683	-6.45053
ENSG00000067182	TNFRSF1A	0.133331	5.15086	1.03696	0.300829	0.439763	-6.41453
ENSG00000067208	EVI5	-0.674688	1.00201	-3.49982	0.00055752	0.00324363	-0.903698
ENSG00000067225	PKM	-0.359543	5.531	-2.77656	0.00593965	0.021607	-3.16753
ENSG00000067334	DNTTIP2	0.269559	2.51943	1.7482	0.0817441	0.16554	-5.40971
ENSG00000067365	METTL22	-0.292768	2.096	-1.75248	0.0810047	0.164482	-5.39479
ENSG00000067369	TP53BP1	-0.237342	1.2351	-1.61147	0.108429	0.205343	-5.5498
ENSG00000067560	RHOA	-0.00957581	5.75035	-0.0769363	0.93874	0.961898	-6.93644
ENSG00000067596	DHX8	0.219488	1.6137	1.7257	0.0857256	0.171416	-5.38217
ENSG00000067606	PRKCZ	-1.03351	0.0464386	-4.59225	7.17153e-06	8.85779e-05	3.28498
ENSG00000067704	IARS2	-0.57991	-0.055211	-3.42632	0.000722851	0.00398195	-0.989675
ENSG00000067798	NAV3	-0.437831	-0.395455	-1.3861	0.167038	0.28478	-5.62024
ENSG00000067829	IDH3G	-0.100354	1.48907	-0.641778	0.521647	0.651248	-6.64468
ENSG00000067836	ROGDI	-0.683233	0.51454	-3.77482	0.000203144	0.00142331	0.0979003
ENSG00000067900	ROCK1	0.146264	2.77891	1.17036	0.243049	0.376546	-6.25348
ENSG00000067955	CBFB	-0.126234	2.30507	-0.936859	0.349799	0.489888	-6.4831
ENSG00000068024	HDAC4	0.337808	3.5298	2.44187	0.0153548	0.0454373	-4.0188
ENSG00000068028	RASSF1	-0.167571	-0.223918	-1.04684	0.296257	0.435017	-6.0288
ENSG00000068079	IFI35	1.71025	3.12857	7.56928	8.65369e-13	6.76086e-11	18.5432
ENSG00000068097	HEATR6	0.0664635	0.749611	0.363957	0.71622	0.80494	-6.67623
ENSG00000068120	COASY	-0.161456	1.1272	-1.20833	0.228145	0.359683	-6.09087
ENSG00000068305	MEF2A	0.681256	2.55958	5.07305	7.98431e-07	1.39605e-05	5.22715
ENSG00000068308	OTUD5	0.4772	2.25355	4.06736	6.50568e-05	0.000565741	1.04848
ENSG00000068323	TFE3	0.154992	3.2061	1.12242	0.262838	0.399164	-6.31957
ENSG00000068366	ACSL4	0.430835	3.07259	2.87685	0.00438874	0.0170799	-2.89127
ENSG00000068383	INPP5A	0.0843739	1.41339	0.486599	0.626999	0.736966	-6.71136
ENSG00000068400	GRIPAP1	0.466435	3.1447	3.54585	0.0004728	0.00283277	-0.847021
ENSG00000068438	FTSJ1	-0.279209	-0.0601627	-1.46863	0.14328	0.25345	-5.55156
ENSG00000068650	ATP11A	0.108753	3.43058	0.810429	0.418519	0.558826	-6.62245
ENSG00000068654	POLR1A	-0.507541	-0.197057	-2.55427	0.0112777	0.0359397	-3.4302
ENSG00000068697	LAPTM4A	0.0663627	3.06245	0.480237	0.631509	0.740156	-6.8279
ENSG00000068724	TTC7A	-0.221019	1.54591	-1.56936	0.117919	0.218976	-5.64665
ENSG00000068745	IP6K2	0.259868	2.09782	2.13847	0.0335176	0.0837264	-4.64246
ENSG00000068784	SRBD1	0.936124	0.805802	4.22282	3.45906e-05	0.00033614	1.81773
ENSG00000068796	KIF2A	0.172975	0.706975	1.04241	0.298299	0.437168	-6.18841
ENSG00000068831	RASGRP2	-0.0548697	2.43382	-0.336278	0.736963	0.821965	-6.86776
ENSG00000068878	PSME4	-0.444129	1.16812	-3.15938	0.00178998	0.00834306	-1.98515
ENSG00000068885	IFT80	-0.0509382	0.485155	-0.243712	0.807668	0.872551	-6.67616
ENSG00000068903	SIRT2	-0.324948	1.83116	-2.60238	0.00985055	0.0322263	-3.57498
ENSG00000068912	ERLEC1	0.198228	0.582996	1.21281	0.226427	0.357892	-5.97641
ENSG00000068971	PPP2R5B	-0.468853	0.16438	-2.93294	0.00369202	0.014947	-2.50442
ENSG00000068976	PYGM	-0.228421	-0.24287	-0.926024	0.35539	0.495884	-6.14326
ENSG00000069011	PITX1	-1.03949	-0.364384	-4.56241	8.17371e-06	9.87264e-05	3.22045
ENSG00000069020	MAST4	-0.529417	0.34616	-2.40499	0.0169527	0.0490975	-3.88277
ENSG00000069248	NUP133	-0.104277	0.637242	-0.602877	0.547176	0.673721	-6.56138
ENSG00000069275	NUCKS1	-0.622211	0.395591	-2.87251	0.00444731	0.0172403	-2.71448
ENSG00000069329	VPS35	-0.0320602	2.39237	-0.268917	0.788231	0.859381	-6.88481
ENSG00000069345	DNAJA2	-0.145836	1.81152	-1.55015	0.12246	0.225074	-5.70026
ENSG00000069399	BCL3	0.311853	5.35439	2.19049	0.0294788	0.0756884	-4.58361
ENSG00000069424	KCNAB2	-0.483165	3.2208	-3.07804	0.00233285	0.0102658	-2.32976
ENSG00000069493	CLEC2D	0.872141	1.09528	4.27107	2.83266e-05	0.000285411	1.96296
ENSG00000069667	RORA	-0.35829	-0.0156264	-1.71794	0.0871344	0.173564	-5.18934
ENSG00000069849	ATP1B3	0.233049	3.27451	1.49982	0.135013	0.242664	-5.83107
ENSG00000069869	NEDD4	-0.407401	3.36495	-1.30922	0.191748	0.315278	-6.10102
ENSG00000069943	PIGB	0.335031	1.59632	1.85153	0.0653564	0.13959	-5.15448
ENSG00000069956	MAPK6	0.185839	2.32641	1.33542	0.183041	0.304728	-6.02692
ENSG00000069974	RAB27A	0.483923	3.11145	2.75671	0.00630016	0.0226181	-3.21672
ENSG00000070010	UFD1	-0.0776458	1.66927	-0.5929	0.553822	0.67944	-6.69842
ENSG00000070047	PHRF1	0.167134	0.928919	1.23891	0.216623	0.344748	-6.00457
ENSG00000070081	NUCB2	-0.234804	2.15479	-1.28681	0.199435	0.323934	-6.0948
ENSG00000070087	PFN2	-0.568534	0.434497	-2.72036	0.00701182	0.0247311	-3.13514
ENSG00000070190	DAPP1	1.61733	2.38313	7.22027	7.26341e-12	4.41364e-10	16.4959
ENSG00000070214	SLC44A1	0.145426	0.148657	0.786349	0.432461	0.571429	-6.32417
ENSG00000070269	TMEM260	0.318617	1.3699	1.86936	0.0628246	0.135327	-5.08705
ENSG00000070366	SMG6	-0.106801	1.0512	-0.597903	0.550484	0.676441	-6.62655
ENSG00000070367	EXOC5	0.00760911	1.41257	0.0594476	0.952646	0.970825	-6.84017
ENSG00000070413	DGCR2	0.368238	1.53617	2.50665	0.0128695	0.0396393	-3.7494
ENSG00000070423	RNF126	-0.675408	0.349935	-4.20601	3.70679e-05	0.000354958	1.71449
ENSG00000070444	MNT	-0.341503	2.18362	-2.1375	0.0335969	0.0838558	-4.66725
ENSG00000070476	ZXDC	-0.170124	0.840653	-1.5652	0.118892	0.22042	-5.5636
ENSG00000070495	JMJD6	0.188364	2.83487	1.34671	0.17938	0.300002	-6.03522
ENSG00000070501	POLB	0.438516	1.50982	2.32827	0.0207529	0.0575956	-4.16423
ENSG00000070526	ST6GALNAC1	-0.437789	0.256766	-1.727	0.0854911	0.171052	-5.22404
ENSG00000070540	WIPI1	0.00809951	1.99609	0.0561807	0.955246	0.973038	-6.89257
ENSG00000070610	GBA2	0.0457204	1.85977	0.390157	0.696776	0.78867	-6.809
ENSG00000070614	NDST1	-0.296606	1.87474	-1.71257	0.0881193	0.174994	-5.44809
ENSG00000070669	ASNS	0.0470263	-0.291016	0.228038	0.819817	0.881805	-6.52884
ENSG00000070729	CNGB1	-0.0256372	0.035924	-0.0891684	0.929025	0.955923	-6.59173
ENSG00000070731	ST6GALNAC2	-0.175485	1.36389	-1.08797	0.27773	0.415269	-6.25915
ENSG00000070756	PABPC1	-0.41364	5.03243	-3.58624	0.00040856	0.00252389	-0.718397
ENSG00000070761	CFAP20	-0.179647	-0.229831	-0.828099	0.40846	0.548402	-6.2297
ENSG00000070770	CSNK2A2	-0.135919	0.919813	-1.05506	0.29249	0.430929	-6.23155
ENSG00000070814	TCOF1	0.0491581	0.478539	0.294391	0.768721	0.845507	-6.64691
ENSG00000070831	CDC42	0.0444703	4.67676	0.53087	0.596013	0.712896	-6.81136
ENSG00000070882	OSBPL3	-0.11603	1.24561	-0.796317	0.426657	0.566131	-6.50957
ENSG00000070961	ATP2B1	-0.117255	3.7473	-0.573812	0.566648	0.689246	-6.78904
ENSG00000071051	NCK2	-0.00766361	0.963417	-0.0521192	0.958478	0.974653	-6.7817
ENSG00000071054	MAP4K4	0.21745	4.19876	1.40606	0.161036	0.277139	-5.9735
ENSG00000071073	MGAT4A	0.768555	1.49011	4.22517	3.42562e-05	0.000333787	1.72918
ENSG00000071082	RPL31	-0.350066	4.48036	-1.89838	0.05888	0.128889	-5.17172
ENSG00000071127	WDR1	-0.223791	5.2608	-2.51153	0.0126976	0.0392079	-3.8485
ENSG00000071189	SNX13	0.301892	1.85421	2.49244	0.0133819	0.0408896	-3.8245
ENSG00000071205	ARHGAP10	-0.259946	-0.254215	-1.48071	0.140033	0.24932	-5.49945
ENSG00000071243	ING3	0.738758	0.364203	4.36074	1.94519e-05	0.000206119	2.41522
ENSG00000071246	VASH1	0.138483	0.555324	0.659929	0.50995	0.640136	-6.47244
ENSG00000071462	BUD23	-0.29223	1.222	-1.83029	0.0684815	0.144545	-5.18582
ENSG00000071537	SEL1L	-0.0669062	2.3673	-0.445882	0.656096	0.757341	-6.82225
ENSG00000071553	ATP6AP1	-0.143302	3.73287	-0.923044	0.356937	0.497761	-6.52922
ENSG00000071564	TCF3	0.225788	1.25363	1.17633	0.240663	0.374086	-6.12107
ENSG00000071575	TRIB2	0.730211	-0.0419368	2.65793	0.00840567	0.0285595	-3.082
ENSG00000071626	DAZAP1	-0.214899	1.98084	-1.47115	0.142597	0.252378	-5.83083
ENSG00000071655	MBD3	-0.853449	0.565876	-4.66023	5.31067e-06	6.86304e-05	3.52111
ENSG00000071859	FAM50A	-0.0807641	2.63086	-0.55136	0.581914	0.701318	-6.78129
ENSG00000071889	FAM3A	-0.537131	0.340506	-3.42823	0.000718011	0.00396639	-1.04407
ENSG00000071894	CPSF1	-0.422216	1.19704	-2.80435	0.00546637	0.0202145	-2.99178
ENSG00000071994	PDCD2	-0.385368	0.269822	-2.34989	0.019613	0.0550216	-3.99293
ENSG00000072042	RDH11	-0.500181	0.35575	-2.93161	0.00370726	0.0149874	-2.53587
ENSG00000072062	PRKACA	-0.449803	2.4876	-3.95802	0.000100339	0.000801081	0.608558
ENSG00000072071	ADGRL1	-0.497829	-0.0590473	-2.68247	0.00783041	0.0270941	-3.12744
ENSG00000072080	SPP2	-0.193894	-0.442797	-0.529121	0.597224	0.713826	-6.40097
ENSG00000072110	ACTN1	-0.319813	4.80674	-2.97823	0.003205	0.0133687	-2.61815
ENSG00000072121	ZFYVE26	0.529507	1.70327	3.47771	0.000603092	0.0034597	-0.990493
ENSG00000072134	EPN2	-0.486723	0.595314	-2.08038	0.0385817	0.0931792	-4.63143
ENSG00000072135	PTPN18	-0.303301	2.04322	-2.37399	0.018407	0.0523696	-4.14144
ENSG00000072210	ALDH3A2	-1.01229	0.990119	-5.79426	2.20895e-08	6.12532e-07	8.72135
ENSG00000072274	TFRC	-0.765383	3.76986	-3.88432	0.000133677	0.00100913	0.321011
ENSG00000072310	SREBF1	-0.0777835	2.76196	-0.651657	0.515263	0.645237	-6.7252
ENSG00000072364	AFF4	0.0404819	2.79067	0.389065	0.697582	0.789303	-6.86025
ENSG00000072401	UBE2D1	0.61537	2.92486	4.12768	5.10259e-05	0.000465092	1.24983
ENSG00000072415	MPP5	0.01392	0.0317263	0.0836993	0.933367	0.958174	-6.60947
ENSG00000072501	SMC1A	-0.117615	1.16703	-0.725092	0.469122	0.604139	-6.55825
ENSG00000072506	HSD17B10	-0.394015	0.338386	-2.19643	0.0290457	0.0748693	-4.3393
ENSG00000072518	MARK2	0.277279	2.99943	2.63446	0.00899116	0.0299812	-3.53562
ENSG00000072609	CHFR	0.104203	2.92764	0.966575	0.334757	0.474902	-6.47499
ENSG00000072682	P4HA2	-0.762631	0.92051	-3.36954	0.00088082	0.00467933	-1.32494
ENSG00000072694	FCGR2B	0.923971	2.21294	4.38931	1.72349e-05	0.000187327	2.32444
ENSG00000072736	NFATC3	0.366761	0.749771	3.10502	0.00213791	0.00958361	-2.04105
ENSG00000072756	TRNT1	0.231186	0.626737	1.236	0.217703	0.346158	-5.95483
ENSG00000072778	ACADVL	-0.640635	3.9069	-4.54997	8.63008e-06	0.000103351	2.91403
ENSG00000072786	STK10	-0.134397	4.66412	-0.940656	0.347854	0.488045	-6.5116
ENSG00000072803	FBXW11	0.144161	1.6798	0.979457	0.328368	0.468407	-6.38685
ENSG00000072818	ACAP1	0.145505	3.20814	0.857374	0.392118	0.53345	-6.57904
ENSG00000072849	DERL2	0.0555101	1.50347	0.380699	0.703773	0.794853	-6.77323
ENSG00000072858	SIDT1	-0.19197	-0.2351	-0.805794	0.421182	0.560851	-6.26057
ENSG00000072864	NDE1	-0.0926451	2.35566	-0.784359	0.433625	0.572352	-6.6163
ENSG00000072952	MRVI1	0.131517	0.604622	0.636135	0.525312	0.654579	-6.49525
ENSG00000072958	AP1M1	-0.277287	2.14111	-2.01651	0.0448918	0.104521	-4.90667
ENSG00000073008	PVR	-1.11004	-0.0874664	-6.9691	3.23471e-11	1.71196e-09	15.103
ENSG00000073050	XRCC1	-0.49713	0.366573	-3.26078	0.00127703	0.0063203	-1.56246
ENSG00000073060	SCARB1	-1.12379	0.0726094	-6.63032	2.30153e-10	1.0489e-08	13.1982
ENSG00000073169	SELENOO	0.0514729	0.194987	0.312523	0.754922	0.835182	-6.57999
ENSG00000073331	ALPK1	0.241605	3.31041	1.4919	0.137077	0.245342	-5.84341
ENSG00000073350	LLGL2	-1.22143	0.768515	-5.46841	1.16543e-07	2.65566e-06	7.14183
ENSG00000073417	PDE8A	-0.643461	1.03027	-3.57693	0.000422591	0.00259512	-0.650629
ENSG00000073578	SDHA	-0.405884	1.878	-3.27789	0.00120528	0.00603805	-1.67826
ENSG00000073584	SMARCE1	0.0622153	1.60483	0.507684	0.612154	0.725243	-6.73113
ENSG00000073614	KDM5A	0.316776	2.61529	2.63641	0.00894106	0.0299272	-3.51545
ENSG00000073737	DHRS9	0.392852	1.35999	1.73249	0.0845071	0.169565	-5.33152
ENSG00000073756	PTGS2	-0.17027	4.92545	-0.521175	0.602739	0.717996	-6.81398
ENSG00000073792	IGF2BP2	-0.317557	0.903458	-1.33499	0.18318	0.304833	-5.91481
ENSG00000073803	MAP3K13	-0.000549984	1.2316	-0.00336768	0.997316	0.998432	-6.8208
ENSG00000073849	ST6GAL1	0.138637	1.31607	0.800975	0.423961	0.563449	-6.5015
ENSG00000073910	FRY	-0.430578	0.449825	-2.56056	0.011081	0.0354622	-3.53236
ENSG00000073921	PICALM	0.356936	5.46635	2.80936	0.00538492	0.0199847	-3.08357
ENSG00000073969	NSF	0.24723	1.4687	1.74868	0.0816612	0.16544	-5.3235
ENSG00000074054	CLASP1	0.345695	1.72359	2.71837	0.00705281	0.0248489	-3.24081
ENSG00000074071	MRPS34	-0.390281	-0.0116088	-1.84114	0.0668706	0.142329	-4.96871
ENSG00000074201	CLNS1A	-0.0022193	1.47229	-0.0136763	0.9891	0.992225	-6.84819
ENSG00000074319	TSG101	0.379041	2.26849	2.96889	0.00330037	0.0136853	-2.60041
ENSG00000074356	NCBP3	-0.530553	0.925582	-3.58932	0.000404024	0.00250271	-0.588079
ENSG00000074370	ATP2A3	0.0993167	2.71753	0.60864	0.543355	0.670022	-6.7483
ENSG00000074416	MGLL	-0.237606	2.25517	-0.980599	0.327806	0.467941	-6.44448
ENSG00000074603	DPP8	0.338307	1.1085	2.5061	0.0128889	0.0396815	-3.69996
ENSG00000074621	SLC24A1	0.465361	0.20178	2.24136	0.0259434	0.0685051	-4.15254
ENSG00000074657	ZNF532	-0.453647	0.334174	-1.90635	0.0578332	0.12688	-4.9267
ENSG00000074660	SCARF1	0.112356	2.79734	0.484371	0.628577	0.738126	-6.81803
ENSG00000074695	LMAN1	-0.845343	0.340332	-4.97716	1.25315e-06	2.0124e-05	4.91355
ENSG00000074696	HACD3	-0.425657	0.166923	-2.39553	0.0173853	0.0499828	-3.87692
ENSG00000074706	IPCEF1	0.39272	0.984634	1.96682	0.0503889	0.11445	-4.85
ENSG00000074755	ZZEF1	0.120831	1.93824	1.22643	0.221274	0.35093	-6.14061
ENSG00000074800	ENO1	-0.461579	5.04911	-3.8711	0.000140676	0.0010491	0.278758
ENSG00000074842	MYDGF	-0.50672	1.87332	-2.91844	0.00386173	0.0154894	-2.74597
ENSG00000074935	TUBE1	-0.345667	0.379251	-1.5402	0.124866	0.228067	-5.54015
ENSG00000074964	ARHGEF10L	0.0686796	1.73485	0.379981	0.704305	0.795272	-6.79381
ENSG00000075089	ACTR6	-0.107817	0.413916	-0.509614	0.610803	0.724174	-6.57194
ENSG00000075142	SRI	-0.0690161	2.13075	-0.420221	0.674711	0.77123	-6.82089
ENSG00000075151	EIF4G3	0.922187	2.80246	7.01731	2.43451e-11	1.33141e-09	15.2843
ENSG00000075223	SEMA3C	-1.12251	1.01891	-6.17843	2.85512e-09	1.0333e-07	10.6937
ENSG00000075234	TTC38	0.11118	1.04468	0.549814	0.582972	0.702077	-6.62497
ENSG00000075239	ACAT1	-0.510562	1.19392	-2.79681	0.00559132	0.0205761	-3.0217
ENSG00000075240	GRAMD4	0.0884618	1.33083	0.421351	0.673887	0.770738	-6.72844
ENSG00000075275	CELSR1	-1.31208	-0.389768	-6.04554	5.85338e-09	1.91431e-07	10.1122
ENSG00000075292	ZNF638	0.412501	3.59409	2.73035	0.00680928	0.0241291	-3.29692
ENSG00000075303	SLC25A40	0.406103	0.929276	2.03387	0.0430957	0.101297	-4.71964
ENSG00000075399	VPS9D1	0.0474952	3.55243	0.245131	0.806571	0.871748	-6.92084
ENSG00000075407	ZNF37A	-0.237932	-0.0211562	-1.39289	0.164977	0.282234	-5.66423
ENSG00000075413	MARK3	0.317661	3.37755	3.25161	0.00131706	0.00648583	-1.80186
ENSG00000075415	SLC25A3	-0.559902	3.2298	-4.67833	4.89963e-06	6.40531e-05	3.45618
ENSG00000075420	FNDC3B	0.40264	5.17287	3.09194	0.00223044	0.00988583	-2.28752
ENSG00000075426	FOSL2	0.0830624	5.29531	0.599607	0.54935	0.675553	-6.76773
ENSG00000075539	FRYL	0.220262	2.15269	1.77965	0.0764344	0.157542	-5.33479
ENSG00000075568	TMEM131	0.327936	1.47441	2.32845	0.0207437	0.0575956	-4.16954
ENSG00000075624	ACTB	0.187877	10.0469	1.42134	0.156553	0.27113	-5.87047
ENSG00000075651	PLD1	0.0153725	2.2105	0.0802218	0.93613	0.960223	-6.90577
ENSG00000075711	DLG1	-0.0529543	1.1176	-0.361956	0.717713	0.806186	-6.74219
ENSG00000075785	RAB7A	0.162116	4.94091	1.6721	0.0958454	0.186553	-5.56705
ENSG00000075790	BCAP29	0.0587767	0.499188	0.318758	0.750195	0.831654	-6.64276
ENSG00000075856	SART3	-0.00230472	1.33008	-0.0167318	0.986665	0.990756	-6.83465
ENSG00000075884	ARHGAP15	0.605311	3.51828	3.03188	0.00270469	0.0117446	-2.45922
ENSG00000075914	EXOSC7	-0.62965	-0.374708	-3.22941	0.00141891	0.00687053	-1.54492
ENSG00000076043	REXO2	-0.257469	-0.264163	-1.16422	0.245524	0.379068	-5.91228
ENSG00000076053	RBM7	0.89968	1.65707	5.87974	1.4121e-08	4.12931e-07	9.17236
ENSG00000076067	RBMS2	-0.391481	0.370607	-1.6944	0.091524	0.180084	-5.28845
ENSG00000076108	BAZ2A	0.374227	3.61233	3.42772	0.000719305	0.00397131	-1.24618
ENSG00000076201	PTPN23	-0.544664	1.17758	-3.44823	0.000669286	0.0037477	-1.08447
ENSG00000076242	MLH1	0.0127975	1.18462	0.0935493	0.925547	0.953923	-6.80608
ENSG00000076382	SPAG5	-0.457682	0.0524831	-2.40736	0.0168455	0.048859	-3.83235
ENSG00000076513	ANKRD13A	0.226306	2.91818	1.86293	0.0637284	0.136839	-5.2225
ENSG00000076554	TPD52	-0.719161	0.0962085	-2.93116	0.0037125	0.0149962	-2.52162
ENSG00000076555	ACACB	-0.541251	1.07957	-2.56643	0.0109003	0.0349861	-3.60663
ENSG00000076604	TRAF4	-0.687609	1.04039	-3.27107	0.00123342	0.00615707	-1.6316
ENSG00000076641	PAG1	0.276117	3.48745	1.42206	0.156344	0.27096	-5.94614
ENSG00000076662	ICAM3	0.323798	3.68171	1.74322	0.0826114	0.166782	-5.44774
ENSG00000076685	NT5C2	0.650613	4.18052	5.08528	7.53495e-07	1.32928e-05	5.24724
ENSG00000076924	XAB2	0.00540003	0.780246	0.0442553	0.964739	0.97896	-6.74346
ENSG00000076928	ARHGEF1	0.126011	4.21473	0.956806	0.339655	0.479914	-6.49861
ENSG00000076944	STXBP2	0.339708	6.55319	2.11397	0.0355791	0.0876916	-4.72886
ENSG00000076984	MAP2K7	-0.629146	0.557773	-4.13211	5.01174e-05	0.000457658	1.40701
ENSG00000077044	DGKD	-0.210867	2.59317	-1.16391	0.245649	0.379142	-6.25936
ENSG00000077097	TOP2B	0.180187	1.07914	1.36781	0.172686	0.291332	-5.8611
ENSG00000077147	TM9SF3	0.112886	2.10784	0.874219	0.382898	0.524453	-6.51976
ENSG00000077150	NFKB2	0.357563	4.83603	2.28039	0.0234869	0.0633786	-4.39254
ENSG00000077157	PPP1R12B	-0.968788	0.559685	-5.40475	1.59999e-07	3.49231e-06	6.85934
ENSG00000077232	DNAJC10	-0.17086	0.626662	-0.935167	0.350669	0.490757	-6.30353
ENSG00000077235	GTF3C1	-0.042197	0.845855	-0.278675	0.780741	0.85394	-6.72281
ENSG00000077238	IL4R	0.0976913	5.51068	0.580665	0.562026	0.686062	-6.77651
ENSG00000077254	USP33	0.0586441	2.26883	0.407808	0.683788	0.778732	-6.82927
ENSG00000077312	SNRPA	-0.249958	0.973926	-1.47763	0.140854	0.250147	-5.72151
ENSG00000077327	SPAG6	-1.1788	-0.658252	-4.49872	1.07827e-05	0.000125023	2.99195
ENSG00000077380	DYNC1I2	-0.0617492	1.97777	-0.426835	0.669893	0.768163	-6.80508
ENSG00000077420	APBB1IP	0.426658	3.67338	2.68096	0.00786492	0.0272039	-3.42705
ENSG00000077454	LRCH4	-0.194518	3.2833	-1.47925	0.140421	0.249783	-5.86555
ENSG00000077458	FAM76B	0.175725	1.35351	0.911649	0.362894	0.50413	-6.40642
ENSG00000077463	SIRT6	0.0802087	1.1452	0.482875	0.629637	0.73893	-6.68451
ENSG00000077514	POLD3	0.271098	1.0348	1.78255	0.0759596	0.156958	-5.20278
ENSG00000077549	CAPZB	0.172167	4.39199	1.86477	0.0634682	0.136385	-5.23551
ENSG00000077585	GPR137B	0.154228	2.7139	0.978822	0.328681	0.468407	-6.454
ENSG00000077684	JADE1	-0.0795094	-0.0167393	-0.448802	0.653991	0.756293	-6.50232
ENSG00000077721	UBE2A	-0.0290063	2.41285	-0.232234	0.816559	0.879454	-6.89387
ENSG00000077782	FGFR1	-1.02962	0.172106	-4.06315	6.61634e-05	0.000570826	1.16591
ENSG00000077984	CST7	0.930951	4.31064	3.68732	0.000281911	0.00186877	-0.376772
ENSG00000078043	PIAS2	-0.370448	0.0433824	-1.93408	0.0543123	0.121073	-4.82176
ENSG00000078061	ARAF	-0.188795	1.76432	-1.70921	0.0887405	0.175838	-5.438
ENSG00000078070	MCCC1	0.145474	-0.198254	0.606897	0.544509	0.671193	-6.36119
ENSG00000078081	LAMP3	2.16439	1.35873	5.98963	7.89223e-09	2.47424e-07	9.81482
ENSG00000078098	FAP	2.42828	0.17871	5.32826	2.33319e-07	4.86608e-06	6.67348
ENSG00000078114	NEBL	-1.22834	-0.217861	-5.02099	1.02063e-06	1.68859e-05	5.16137
ENSG00000078124	ACER3	-0.15444	1.64139	-0.952746	0.341704	0.482049	-6.42208
ENSG00000078140	UBE2K	0.0797854	1.98889	0.557711	0.577576	0.69737	-6.73624
ENSG00000078142	PIK3C3	0.228229	1.64513	1.64417	0.101487	0.19535	-5.5179
ENSG00000078269	SYNJ2	0.0277716	0.34316	0.175161	0.861105	0.909567	-6.65621
ENSG00000078304	PPP2R5C	0.436086	3.93642	4.13951	4.86362e-05	0.000447187	1.27517
ENSG00000078369	GNB1	0.122869	4.84101	1.35358	0.177179	0.297028	-6.04271
ENSG00000078401	EDN1	0.27197	0.422982	0.951003	0.342587	0.482947	-6.22115
ENSG00000078403	MLLT10	-0.22118	1.2275	-1.21372	0.226081	0.357424	-6.09402
ENSG00000078487	ZCWPW1	0.302132	1.33994	1.58054	0.115337	0.215115	-5.57772
ENSG00000078618	NRDC	0.388807	3.8785	3.36851	0.00088399	0.00468605	-1.43903
ENSG00000078668	VDAC3	0.0255789	1.26354	0.163593	0.870193	0.915679	-6.81208
ENSG00000078674	PCM1	0.0860187	2.70284	0.625573	0.532206	0.660328	-6.73786
ENSG00000078687	TNRC6C	-0.00791116	0.127925	-0.0486856	0.961211	0.976857	-6.62259
ENSG00000078699	CBFA2T2	0.0653575	0.117656	0.445208	0.656582	0.757725	-6.52374
ENSG00000078747	ITCH	0.0272965	2.42304	0.213695	0.830971	0.889139	-6.89836
ENSG00000078804	TP53INP2	-0.225682	1.8488	-1.38301	0.167983	0.285896	-5.94315
ENSG00000078808	SDF4	-0.124897	3.07416	-1.06981	0.285811	0.42355	-6.37693
ENSG00000078814	MYH7B	-0.173831	-0.253739	-0.961496	0.337298	0.477781	-6.11126
ENSG00000078902	TOLLIP	-0.132939	2.42354	-0.940589	0.347888	0.488045	-6.48494
ENSG00000078967	UBE2D4	-0.900514	0.579041	-3.11117	0.00209562	0.00944227	-2.0894
ENSG00000079134	THOC1	-0.63309	0.232939	-3.50244	0.000552333	0.00321916	-0.787334
ENSG00000079215	SLC1A3	0.688064	2.28829	3.34777	0.000949544	0.00496405	-1.44773
ENSG00000079246	XRCC5	0.0381947	2.89124	0.335794	0.737328	0.822186	-6.88293
ENSG00000079263	SP140	2.03536	2.96639	8.55597	1.57143e-15	2.27487e-13	24.7159
ENSG00000079277	MKNK1	-0.0766286	4.34627	-0.480905	0.631034	0.739688	-6.83786
ENSG00000079308	TNS1	-0.0904634	2.02273	-0.460384	0.645669	0.750752	-6.79341
ENSG00000079313	REXO1	-0.450119	1.54749	-2.14859	0.0326966	0.0821086	-4.60385
ENSG00000079332	SAR1A	0.233029	2.14302	1.90473	0.058044	0.127286	-5.10851
ENSG00000079335	CDC14A	0.123394	0.2639	0.831657	0.406453	0.546601	-6.30798
ENSG00000079385	CEACAM1	1.26338	3.59629	6.22038	2.27131e-09	8.40556e-08	10.8638
ENSG00000079387	SENP1	0.288005	0.68622	1.80336	0.0726214	0.151651	-5.10455
ENSG00000079432	CIC	-0.281141	2.3258	-1.96519	0.0505782	0.114616	-5.01681
ENSG00000079459	FDFT1	-0.329076	1.8138	-2.29317	0.0227284	0.0618586	-4.30938
ENSG00000079739	PGM1	-0.291735	0.241722	-1.6888	0.0925932	0.181789	-5.28516
ENSG00000079785	DDX1	0.0447516	0.0671113	0.230023	0.818275	0.88082	-6.59525
ENSG00000079805	DNM2	-0.422443	4.52021	-3.63648	0.000340095	0.00216692	-0.551749
ENSG00000079819	EPB41L2	-0.191523	0.278491	-0.978777	0.328703	0.468407	-6.21545
ENSG00000079950	STX7	0.457335	2.51203	3.3677	0.000886444	0.00469534	-1.40695
ENSG00000079974	RABL2B	-1.02761	0.679995	-5.30323	2.63742e-07	5.36421e-06	6.3657
ENSG00000079999	KEAP1	0.136162	1.30549	0.872248	0.383969	0.525336	-6.44561
ENSG00000080189	SLC35C2	0.015485	1.16607	0.111457	0.91135	0.944151	-6.80308
ENSG00000080298	RFX3	-0.270796	0.643475	-1.35775	0.175856	0.295414	-5.84287
ENSG00000080345	RIF1	0.386324	0.779637	2.91362	0.00391962	0.0156785	-2.58994
ENSG00000080371	RAB21	0.198789	3.00798	1.29055	0.198138	0.322658	-6.11349
ENSG00000080503	SMARCA2	-0.634731	3.19511	-2.85024	0.00475943	0.0181362	-2.97682
ENSG00000080603	SRCAP	-0.262741	1.69389	-2.19818	0.028919	0.0746134	-4.50176
ENSG00000080608	PUM3	-0.301054	-0.0511797	-1.39559	0.164164	0.281244	-5.65596
ENSG00000080802	CNOT4	0.298725	0.93497	2.33908	0.020176	0.0562802	-4.07338
ENSG00000080815	PSEN1	0.230809	4.0196	1.95826	0.0513903	0.116056	-5.06014
ENSG00000080822	CLDND1	0.324312	2.05679	2.07273	0.0392955	0.0943935	-4.76737
ENSG00000080823	MOK	-0.679367	0.987735	-2.85669	0.00466703	0.0178694	-2.85003
ENSG00000080824	HSP90AA1	0.0108426	5.14067	0.06093	0.951467	0.970189	-6.94406
ENSG00000080845	DLGAP4	0.0938027	2.23964	0.801063	0.42391	0.563449	-6.59007
ENSG00000081019	RSBN1	0.167301	0.651543	0.87363	0.383218	0.524673	-6.32822
ENSG00000081041	CXCL2	-0.867184	4.50508	-3.01034	0.00289629	0.0123907	-2.52572
ENSG00000081059	TCF7	0.3358	0.429645	1.66914	0.0964306	0.187416	-5.27546
ENSG00000081087	OSTM1	0.104694	2.49723	0.792621	0.428804	0.567816	-6.61119
ENSG00000081154	PCNP	0.295221	2.07177	2.04813	0.0416663	0.0985732	-4.82374
ENSG00000081189	MEF2C	-0.492575	1.68322	-1.76452	0.0789523	0.161313	-5.34743
ENSG00000081237	PTPRC	0.6452	6.44184	4.05595	6.80953e-05	0.000583753	0.972142
ENSG00000081307	UBA5	-0.473622	-0.0535403	-2.30976	0.0217751	0.059742	-4.0341
ENSG00000081320	STK17B	0.52517	3.84867	3.17548	0.00169752	0.00798396	-2.03859
ENSG00000081665	ZNF506	-0.482167	0.888931	-3.10093	0.00216646	0.00968074	-2.12971
ENSG00000081760	AACS	-0.54084	1.12505	-2.55101	0.0113807	0.036116	-3.65318
ENSG00000081791	DELE1	-0.0794261	1.23816	-0.601633	0.548003	0.674486	-6.64338
ENSG00000081870	HSPB11	-0.218962	-0.235874	-0.995026	0.320754	0.461017	-6.07959
ENSG00000081913	PHLPP1	-0.045283	0.84296	-0.258959	0.795895	0.864767	-6.73455
ENSG00000081923	ATP8B1	-0.19396	-0.427478	-0.84592	0.398464	0.539394	-6.16726
ENSG00000082014	SMARCD3	0.587821	1.22308	2.50914	0.0127816	0.0394179	-3.68559
ENSG00000082068	WDR70	0.0692566	0.277033	0.377149	0.706405	0.797003	-6.57953
ENSG00000082074	FYB1	1.13931	4.95196	7.13138	1.23684e-11	7.07875e-10	15.9228
ENSG00000082153	BZW1	0.108114	3.68496	0.981047	0.327585	0.467694	-6.47348
ENSG00000082212	ME2	0.0621486	1.81558	0.562062	0.574613	0.695328	-6.72276
ENSG00000082213	C5orf22	0.0993461	0.0389333	0.575225	0.565693	0.688268	-6.44164
ENSG00000082258	CCNT2	0.503137	1.43886	3.34608	0.000955057	0.00497965	-1.38621
ENSG00000082397	EPB41L3	0.0249534	2.72352	0.146	0.884048	0.924821	-6.92375
ENSG00000082515	MRPL22	-0.462978	-0.200715	-2.24267	0.0258578	0.0683156	-4.12135
ENSG00000082641	NFE2L1	-0.321289	2.49606	-2.04368	0.0421076	0.099307	-4.87171
ENSG00000082701	GSK3B	0.022506	1.66878	0.188088	0.850971	0.903811	-6.85032
ENSG00000082781	ITGB5	-1.7475	0.128404	-7.92029	9.6149e-14	9.56051e-12	20.727
ENSG00000082805	ERC1	-0.19372	1.66962	-1.25221	0.211748	0.33921	-6.10139
ENSG00000082898	XPO1	0.180492	2.79713	1.3191	0.18843	0.310932	-6.07008
ENSG00000082996	RNF13	0.629054	4.64404	4.3479	2.05349e-05	0.000215507	2.09098
ENSG00000083099	LYRM2	0.195966	0.274748	1.15007	0.251292	0.385675	-5.99027
ENSG00000083168	KAT6A	0.371379	2.79428	3.11628	0.00206109	0.00932414	-2.19632
ENSG00000083223	TUT7	0.33416	3.25869	2.16008	0.0317847	0.0804135	-4.64449
ENSG00000083290	ULK2	-0.741763	0.356136	-3.37841	0.000854203	0.00457994	-1.20867
ENSG00000083312	TNPO1	0.0869382	2.45216	0.799333	0.42491	0.56433	-6.60395
ENSG00000083444	PLOD1	-0.482639	1.40347	-3.29445	0.00113947	0.00577599	-1.59478
ENSG00000083457	ITGAE	-0.485086	0.770459	-2.90696	0.00400112	0.0159011	-2.67765
ENSG00000083520	DIS3	0.0529482	0.270052	0.415694	0.678016	0.773573	-6.56892
ENSG00000083535	PIBF1	0.240251	-0.24401	1.19689	0.232564	0.365216	-5.82536
ENSG00000083642	PDS5B	0.149782	0.930823	1.24304	0.215101	0.343352	-5.99984
ENSG00000083799	CYLD	0.679733	2.94112	5.14966	5.54454e-07	1.0164e-05	5.56083
ENSG00000083828	ZNF586	-0.196341	0.831782	-1.46565	0.14409	0.254679	-5.71285
ENSG00000083844	ZNF264	-0.315907	0.6321	-1.99206	0.0475301	0.109374	-4.79519
ENSG00000083845	RPS5	-0.577349	3.60871	-3.00462	0.00294922	0.0125571	-2.54564
ENSG00000083857	FAT1	-0.326275	-0.220776	-1.36412	0.173845	0.293036	-5.66397
ENSG00000083896	YTHDC1	0.124075	2.70631	0.975165	0.330488	0.470472	-6.45842
ENSG00000083937	CHMP2B	0.972085	2.11933	6.83338	7.15235e-11	3.68627e-09	14.2649
ENSG00000084070	SMAP2	0.64649	4.13421	3.22915	0.00142016	0.00687072	-1.87589
ENSG00000084072	PPIE	-0.508285	-0.152168	-2.77073	0.00604353	0.0218562	-2.8897
ENSG00000084073	ZMPSTE24	0.0418992	1.0386	0.319646	0.749523	0.831264	-6.74397
ENSG00000084090	STARD7	-0.169955	1.30859	-1.10828	0.268883	0.405415	-6.23083
ENSG00000084093	REST	-0.0472787	0.854423	-0.401346	0.688533	0.782063	-6.68825
ENSG00000084110	HAL	-0.0340632	1.39873	-0.1296	0.896994	0.934277	-6.81959
ENSG00000084112	SSH1	-0.433602	2.03433	-2.46878	0.0142752	0.0430529	-3.91948
ENSG00000084207	GSTP1	-0.925641	3.6889	-3.58954	0.000403691	0.00250271	-0.712621
ENSG00000084234	APLP2	-0.569684	5.08508	-5.32611	2.3579e-07	4.90723e-06	6.36887
ENSG00000084463	WBP11	-0.0256503	0.805882	-0.187029	0.8518	0.904058	-6.7466
ENSG00000084623	EIF3I	-0.515109	2.04653	-3.54785	0.000469403	0.00281585	-0.816184
ENSG00000084652	TXLNA	-0.112951	0.625316	-0.830875	0.406893	0.547044	-6.38634
ENSG00000084676	NCOA1	0.200853	2.43989	1.32	0.188127	0.310569	-6.05297
ENSG00000084733	RAB10	-0.0234322	3.95522	-0.194621	0.845859	0.900379	-6.93424
ENSG00000084754	HADHA	-0.270087	2.20236	-2.90538	0.00402057	0.0159549	-2.79403
ENSG00000084764	MAPRE3	-0.852768	-0.168859	-4.48987	1.12034e-05	0.000129596	2.90272
ENSG00000084774	CAD	-0.393138	-0.260681	-1.88926	0.0600963	0.130882	-4.84257
ENSG00000085063	CD59	0.0506729	3.47639	0.351434	0.72558	0.813046	-6.88823
ENSG00000085117	CD82	-0.0832219	4.95408	-0.508292	0.611729	0.724827	-6.8206
ENSG00000085224	ATRX	0.285581	2.29722	1.85403	0.0649969	0.138973	-5.20882
ENSG00000085231	AK6	0.0938323	0.467804	0.437282	0.662311	0.762482	-6.59
ENSG00000085265	FCN1	0.287218	1.95231	1.59848	0.11129	0.209478	-5.61246
ENSG00000085276	MECOM	-0.503773	-0.330396	-1.96629	0.0504499	0.114502	-4.68809
ENSG00000085365	SCAMP1	0.2829	0.299548	1.74977	0.0814718	0.165158	-5.14431
ENSG00000085415	SEH1L	-0.502096	0.157354	-3.20008	0.00156467	0.00745527	-1.72513
ENSG00000085433	WDR47	-0.189186	0.272961	-1.07916	0.281628	0.419348	-6.10121
ENSG00000085449	WDFY1	0.614238	2.63755	3.8311	0.000164016	0.00119022	0.163152
ENSG00000085491	SLC25A24	0.213863	1.1114	1.46403	0.144531	0.255213	-5.72988
ENSG00000085511	MAP3K4	-0.477056	0.0287123	-2.4023	0.0170748	0.0493349	-3.83155
ENSG00000085514	PILRA	0.0517335	4.287	0.315332	0.752792	0.833387	-6.90386
ENSG00000085662	AKR1B1	-1.22074	1.0768	-5.5456	7.90794e-08	1.8758e-06	7.48086
ENSG00000085719	CPNE3	0.00620241	1.35544	0.0337508	0.973105	0.983293	-6.83822
ENSG00000085721	RRN3	0.000267197	0.247525	0.00159365	0.99873	0.999339	-6.6617
ENSG00000085733	CTTN	-0.869157	0.528193	-3.39454	0.000807667	0.0043661	-1.19493
ENSG00000085788	DDHD2	-0.229927	0.133297	-1.18865	0.235784	0.368481	-5.95597
ENSG00000085831	TTC39A	-0.440241	-0.361251	-2.02882	0.0436123	0.102243	-4.5487
ENSG00000085832	EPS15	0.319928	1.99244	2.8916	0.0041947	0.0165007	-2.79754
ENSG00000085871	MGST2	-0.432316	-0.0288095	-2.21071	0.0280263	0.0727177	-4.24111
ENSG00000085872	CHERP	-0.240833	0.857321	-2.00434	0.0461891	0.106759	-4.80766
ENSG00000085978	ATG16L1	-0.524834	0.720837	-3.2072	0.00152804	0.00730551	-1.78213
ENSG00000085982	USP40	-0.435069	0.00627263	-1.93096	0.0546986	0.121712	-4.81461
ENSG00000085998	POMGNT1	-1.19423	-0.267465	-5.8048	2.09087e-08	5.82883e-07	8.88509
ENSG00000086015	MAST2	-0.91736	0.240892	-5.94054	1.0244e-08	3.09333e-07	9.52662
ENSG00000086061	DNAJA1	0.733873	4.12705	5.089	7.40329e-07	1.3084e-05	5.26445
ENSG00000086062	B4GALT1	0.088381	3.12835	0.666888	0.505502	0.636257	-6.72277
ENSG00000086065	CHMP5	1.16033	2.46908	7.58641	7.78377e-13	6.33252e-11	18.6538
ENSG00000086102	NFX1	-0.0807645	0.94584	-0.621494	0.534881	0.662144	-6.59362
ENSG00000086200	IPO11	0.936339	1.61208	4.10487	5.5954e-05	0.000499828	1.26702
ENSG00000086232	EIF2AK1	-0.257896	1.10065	-1.87404	0.0621748	0.134251	-5.08391
ENSG00000086300	SNX10	0.591018	4.31828	3.34642	0.00095394	0.00497646	-1.51023
ENSG00000086504	MRPL28	-0.196226	1.07081	-1.39748	0.163595	0.280416	-5.84256
ENSG00000086544	ITPKC	0.0236534	0.823037	0.121747	0.903204	0.938776	-6.75148
ENSG00000086548	CEACAM6	-0.0145645	1.40684	-0.0467695	0.962737	0.977735	-6.84017
ENSG00000086589	RBM22	0.315006	1.79449	2.62326	0.00928308	0.0307686	-3.49587
ENSG00000086598	TMED2	-0.26116	2.62867	-1.7614	0.0794802	0.162156	-5.40182
ENSG00000086619	ERO1B	0.602247	0.0814746	3.26206	0.00127153	0.00630227	-1.43499
ENSG00000086666	ZFAND6	0.325177	3.05133	2.48135	0.0137942	0.0419314	-3.91527
ENSG00000086730	LAT2	0.261044	3.7238	2.04946	0.0415352	0.0983351	-4.87954
ENSG00000086758	HUWE1	-0.14033	2.30392	-1.28686	0.199419	0.323934	-6.0981
ENSG00000086848	ALG9	-0.864492	0.44065	-4.30341	2.47532e-05	0.000253559	2.07043
ENSG00000087008	ACOX3	0.218203	0.335554	1.28188	0.201157	0.32592	-5.84234
ENSG00000087074	PPP1R15A	0.423088	6.32038	2.37814	0.0182065	0.0519249	-4.15454
ENSG00000087077	TRIP6	-0.515555	0.412188	-2.97934	0.00319391	0.0133394	-2.41468
ENSG00000087086	FTL	-0.544468	9.59918	-3.43147	0.000709907	0.00393169	-1.16406
ENSG00000087087	SRRT	-0.314132	2.43265	-2.55076	0.0113886	0.0361208	-3.73623
ENSG00000087088	BAX	-0.116828	2.54926	-0.713756	0.476091	0.610001	-6.6777
ENSG00000087111	PIGS	-0.121023	0.958386	-0.860791	0.390237	0.5314	-6.4183
ENSG00000087152	ATXN7L3	0.0351267	2.58049	0.287583	0.773921	0.848855	-6.88584
ENSG00000087157	PGS1	0.0708803	4.36602	0.461395	0.644945	0.750454	-6.84722
ENSG00000087191	PSMC5	-0.0539519	1.77886	-0.371875	0.710323	0.800048	-6.81003
ENSG00000087206	UIMC1	0.0872572	1.9661	0.54342	0.587359	0.705728	-6.74159
ENSG00000087237	CETP	1.11431	-0.176483	5.4387	1.35163e-07	2.99671e-06	7.17526
ENSG00000087253	LPCAT2	0.969335	2.85265	5.30125	2.66313e-07	5.40123e-06	6.27539
ENSG00000087263	OGFOD1	0.0591047	0.00149281	0.307635	0.758634	0.837595	-6.55985
ENSG00000087266	SH3BP2	-0.0219	4.95625	-0.170543	0.864731	0.91149	-6.93491
ENSG00000087274	ADD1	0.0977777	3.31125	0.844461	0.399277	0.540068	-6.59299
ENSG00000087302	RTRAF	0.0876711	1.77886	0.569302	0.569699	0.691471	-6.71527
ENSG00000087338	GMCL1	0.0587918	0.932252	0.357392	0.721121	0.809063	-6.70108
ENSG00000087365	SF3B2	-0.113258	2.99094	-1.12222	0.262921	0.399228	-6.31812
ENSG00000087460	GNAS	-0.355806	5.04222	-3.3854	0.000833736	0.00448977	-1.38069
ENSG00000087470	DNM1L	-0.0679977	1.45601	-0.461489	0.644877	0.750454	-6.74016
ENSG00000087502	ERGIC2	-0.0460314	1.54305	-0.246686	0.805368	0.870927	-6.82992
ENSG00000087589	CASS4	-0.414414	0.549669	-1.82905	0.0686673	0.144807	-5.08946
ENSG00000087884	AAMDC	-0.279281	0.478183	-1.20076	0.23106	0.363521	-6.01696
ENSG00000087903	RFX2	-0.399155	2.84358	-2.45352	0.0148788	0.0442632	-3.98607
ENSG00000088038	CNOT3	0.0979593	1.9697	0.730161	0.466024	0.601014	-6.62318
ENSG00000088205	DDX18	-0.139654	1.21974	-1.08807	0.277685	0.415269	-6.23855
ENSG00000088247	KHSRP	-0.598355	2.6	-4.30359	2.47344e-05	0.000253559	1.92552
ENSG00000088256	GNA11	-1.08329	0.459352	-4.35985	1.95247e-05	0.000206446	2.2885
ENSG00000088280	ASAP3	-0.0905491	0.347954	-0.355384	0.722623	0.810378	-6.63345
ENSG00000088298	EDEM2	0.366667	1.43508	2.31637	0.0214053	0.0589739	-4.19184
ENSG00000088367	EPB41L1	-1.88386	-0.527317	-8.14767	2.25006e-14	2.517e-12	22.1399
ENSG00000088387	DOCK9	-0.580452	-0.143897	-2.69618	0.00752486	0.0262863	-3.09118
ENSG00000088448	ANKRD10	0.457693	4.77544	2.2658	0.0243804	0.0652353	-4.42517
ENSG00000088682	COQ9	-0.171159	-0.0166225	-0.853529	0.394241	0.535741	-6.25074
ENSG00000088727	KIF9	-0.809279	-0.64634	-3.93503	0.00010978	0.000861947	0.847667
ENSG00000088766	CRLS1	-0.277707	0.00974773	-1.38239	0.168175	0.286124	-5.67796
ENSG00000088808	PPP1R13B	-0.979615	-0.0421568	-4.79933	2.8425e-06	4.09088e-05	4.17178
ENSG00000088826	SMOX	-0.193968	0.219564	-0.899964	0.369067	0.509622	-6.26588
ENSG00000088827	SIGLEC1	1.89731	1.69223	5.60565	5.8326e-08	1.44625e-06	7.84941
ENSG00000088832	FKBP1A	0.0554575	4.67061	0.485705	0.627632	0.737368	-6.83456
ENSG00000088833	NSFL1C	0.128997	2.47439	0.989953	0.323222	0.463481	-6.43385
ENSG00000088836	SLC4A11	-1.12067	-0.259106	-3.76807	0.000208387	0.0014487	0.169916
ENSG00000088930	XRN2	0.431226	1.87654	2.89959	0.00409293	0.0161606	-2.75915
ENSG00000088986	DYNLL1	-0.362482	3.26167	-1.78162	0.0761111	0.157106	-5.3811
ENSG00000088992	TESC	0.687428	0.410197	2.46901	0.014266	0.0430489	-3.63601
ENSG00000089006	SNX5	-0.219638	1.82668	-1.83325	0.0680384	0.144098	-5.23133
ENSG00000089009	RPL6	-0.519761	4.08417	-3.29777	0.00112669	0.00572003	-1.66425
ENSG00000089022	MAPKAPK5	-0.238787	0.366491	-1.47873	0.14056	0.249896	-5.62114
ENSG00000089041	P2RX7	0.565903	1.82074	2.68773	0.00771188	0.0267969	-3.3177
ENSG00000089053	ANAPC5	-0.0601632	1.81538	-0.473018	0.636642	0.743894	-6.77138
ENSG00000089057	SLC23A2	0.510417	0.443755	2.87575	0.00440349	0.0171201	-2.63689
ENSG00000089060	SLC8B1	-0.184393	2.02775	-1.46916	0.143137	0.253242	-5.83436
ENSG00000089063	TMEM230	-0.362483	1.25682	-2.83572	0.00497362	0.0188164	-2.92162
ENSG00000089094	KDM2B	-0.443848	0.756441	-2.96148	0.00337783	0.0139712	-2.50811
ENSG00000089101	CFAP61	-1.37839	-1.01262	-5.55566	7.51593e-08	1.80456e-06	7.7146
ENSG00000089127	OAS1	2.64001	3.80771	8.79845	3.13721e-16	5.51476e-14	26.2858
ENSG00000089154	GCN1	-0.84006	1.2672	-4.54683	8.74944e-06	0.000104653	2.98016
ENSG00000089157	RPLP0	-0.752392	4.08225	-3.92341	0.000114867	0.000891057	0.463899
ENSG00000089159	PXN	-0.135818	4.20876	-0.895369	0.371512	0.512424	-6.55504
ENSG00000089220	PEBP1	-0.983489	1.46477	-7.34342	3.45196e-12	2.28061e-10	17.1999
ENSG00000089248	ERP29	-0.0567927	1.46149	-0.375108	0.707921	0.798164	-6.7795
ENSG00000089280	FUS	-0.0269879	4.01707	-0.302116	0.762832	0.841004	-6.90786
ENSG00000089289	IGBP1	0.556966	0.678371	3.94184	0.000106898	0.000842974	0.750432
ENSG00000089327	FXYD5	-0.113801	3.39817	-0.794543	0.427686	0.567099	-6.63624
ENSG00000089335	ZNF302	-0.739155	-0.292574	-3.37258	0.000871606	0.00464477	-1.13266
ENSG00000089351	GRAMD1A	0.224418	5.47332	1.116	0.265568	0.401883	-6.32704
ENSG00000089356	FXYD3	-0.882243	0.793289	-2.69848	0.00747455	0.0261609	-3.25817
ENSG00000089486	CDIP1	-0.153527	0.305769	-0.80865	0.41954	0.559311	-6.3553
ENSG00000089505	CMTM1	0.488023	1.16473	2.05496	0.0409961	0.0972681	-4.68565
ENSG00000089597	GANAB	-0.451091	2.23927	-3.55759	0.000453203	0.00274206	-0.793621
ENSG00000089639	GMIP	0.286479	3.81359	2.01936	0.0445927	0.103997	-4.94003
ENSG00000089692	LAG3	1.4232	0.0177592	3.90315	0.000124279	0.000947642	0.790477
ENSG00000089693	MLF2	-0.223155	2.89351	-1.83274	0.0681146	0.144175	-5.28329
ENSG00000089737	DDX24	-0.48739	1.70126	-3.40692	0.000773574	0.00421653	-1.25932
ENSG00000089775	ZBTB25	0.273221	-0.0386575	1.70304	0.0898918	0.177592	-5.14524
ENSG00000089818	NECAP1	0.223582	2.49179	1.6249	0.105534	0.201177	-5.61333
ENSG00000089820	ARHGAP4	0.135309	3.25835	0.956899	0.339608	0.479914	-6.49145
ENSG00000089876	DHX32	-0.78253	-0.399643	-3.57937	0.000418877	0.00257682	-0.436469
ENSG00000089902	RCOR1	-0.00814327	1.70283	-0.0553242	0.955928	0.973531	-6.86995
ENSG00000089916	GPATCH2L	0.133149	2.04628	1.10476	0.2704	0.407005	-6.28756
ENSG00000090006	LTBP4	-0.748664	0.890507	-3.17689	0.0016896	0.00795811	-1.91145
ENSG00000090013	BLVRB	-0.36959	2.17558	-2.15467	0.0322112	0.0811586	-4.63221
ENSG00000090020	SLC9A1	-0.268441	1.2901	-2.19205	0.0293643	0.0754948	-4.47583
ENSG00000090054	SPTLC1	-0.182551	2.1635	-1.34707	0.179264	0.299859	-6.01341
ENSG00000090060	PAPOLA	0.249228	3.75329	2.62049	0.0093568	0.0309504	-3.58369
ENSG00000090061	CCNK	0.446111	2.04158	4.04907	6.99906e-05	0.000598079	0.990969
ENSG00000090104	RGS1	1.11076	2.54325	4.19564	3.86807e-05	0.000367896	1.54519
ENSG00000090238	YPEL3	0.00981249	3.65104	0.0504107	0.959838	0.975797	-6.95027
ENSG00000090263	MRPS33	-0.680432	-0.360747	-2.91469	0.0039067	0.0156332	-2.46703
ENSG00000090266	NDUFB2	-0.564733	2.4183	-3.54992	0.000465909	0.0027983	-0.828007
ENSG00000090273	NUDC	-0.598725	1.41694	-3.64333	0.000331646	0.00212685	-0.457253
ENSG00000090316	MAEA	-0.352592	3.48467	-2.22234	0.0272193	0.0709793	-4.52001
ENSG00000090339	ICAM1	0.838771	4.95001	4.91713	1.65634e-06	2.56772e-05	4.49177
ENSG00000090372	STRN4	-0.327389	2.83745	-2.79226	0.0056679	0.0208112	-3.12702
ENSG00000090376	IRAK3	0.614006	4.20536	2.94073	0.00360367	0.014671	-2.72697
ENSG00000090382	LYZ	-0.707706	6.16488	-4.10199	5.66062e-05	0.000505196	1.15143
ENSG00000090432	MUL1	0.116325	-0.140072	0.759283	0.44845	0.585482	-6.27821
ENSG00000090487	SPG21	-0.183539	2.9202	-1.76869	0.0782514	0.160414	-5.397
ENSG00000090520	DNAJB11	0.00994383	1.66884	0.0626843	0.950072	0.969372	-6.86268
ENSG00000090581	GNPTG	-0.228304	2.18476	-1.4921	0.137024	0.245301	-5.8134
ENSG00000090615	GOLGA3	-0.622406	1.29057	-4.01664	7.96306e-05	0.000662064	0.889504
ENSG00000090621	PABPC4	-0.599896	2.66331	-3.85307	0.000150778	0.0011118	0.218899
ENSG00000090661	CERS4	-0.599482	0.759373	-3.12043	0.00203341	0.00921587	-2.05997
ENSG00000090674	MCOLN1	-0.371794	3.36232	-2.36438	0.0188798	0.0532892	-4.20232
ENSG00000090686	USP48	-0.144784	1.46133	-1.09418	0.275003	0.412233	-6.25867
ENSG00000090857	PDPR	0.114869	0.576748	0.856446	0.39263	0.53392	-6.34174
ENSG00000090861	AARS1	-0.492151	0.785894	-2.91192	0.00394028	0.0157419	-2.65121
ENSG00000090863	GLG1	-0.0721535	1.98348	-0.676372	0.499474	0.63109	-6.66807
ENSG00000090905	TNRC6A	-0.166384	1.05364	-0.927651	0.354547	0.494848	-6.37691
ENSG00000090924	PLEKHG2	0.280324	3.55108	1.44341	0.150247	0.262985	-5.9163
ENSG00000090989	EXOC1	0.488028	1.04667	3.08107	0.00231017	0.0101933	-2.14019
ENSG00000091039	OSBPL8	0.0761467	3.38088	0.583484	0.560131	0.68442	-6.77921
ENSG00000091073	DTX2	-0.0822142	3.2587	-0.607834	0.543888	0.670596	-6.76445
ENSG00000091106	NLRC4	0.516843	1.5652	2.67378	0.0080301	0.0276103	-3.32553
ENSG00000091136	LAMB1	-0.636141	0.297236	-3.08697	0.00226654	0.0100307	-2.09317
ENSG00000091140	DLD	-0.347547	1.68843	-2.25507	0.0250562	0.0667712	-4.38294
ENSG00000091157	WDR7	0.0415342	0.86233	0.235649	0.813911	0.877562	-6.73992
ENSG00000091164	TXNL1	0.209001	1.27514	1.69149	0.0920779	0.180957	-5.40302
ENSG00000091317	CMTM6	0.42757	4.03038	3.20775	0.00152526	0.00729577	-1.94225
ENSG00000091409	ITGA6	-0.497773	-0.279501	-2.47233	0.0141377	0.0427299	-3.60494
ENSG00000091436	MAP3K20	0.248671	1.61721	1.5773	0.11608	0.216255	-5.61253
ENSG00000091483	FH	-0.65027	-0.402987	-3.09323	0.00222115	0.00986488	-1.94639
ENSG00000091490	SEL1L3	0.0540433	1.5942	0.363985	0.716199	0.80494	-6.79446
ENSG00000091527	CDV3	-0.11184	2.96655	-0.952388	0.341885	0.482235	-6.49244
ENSG00000091542	ALKBH5	-0.56779	1.09991	-4.0648	6.57268e-05	0.000568055	1.09017
ENSG00000091592	NLRP1	-0.302093	1.54726	-1.99847	0.0468257	0.108027	-4.89304
ENSG00000091640	SPAG7	-0.0887085	2.20877	-0.694687	0.487943	0.620235	-6.67323
ENSG00000091651	ORC6	-0.56614	2.00286	-3.05217	0.00253502	0.0110861	-2.37228
ENSG00000092010	PSME1	0.858569	3.97413	5.98808	7.95733e-09	2.48673e-07	9.63833
ENSG00000092020	PPP2R3C	0.612633	2.08239	3.79724	0.000186601	0.00132628	0.0745376
ENSG00000092036	HAUS4	0.675462	2.07779	3.82787	0.000166055	0.00120106	0.19139
ENSG00000092068	SLC7A8	-1.91991	0.0886896	-9.16563	2.62687e-17	5.94564e-15	28.715
ENSG00000092094	OSGEP	-0.260265	0.52063	-1.84246	0.0666764	0.142008	-5.05732
ENSG00000092098	RNF31	0.707047	2.27704	5.16958	5.03966e-07	9.36046e-06	5.68131
ENSG00000092108	SCFD1	0.170642	1.9682	1.12246	0.262821	0.399164	-6.26218
ENSG00000092140	G2E3	0.0858826	0.932953	0.361956	0.717713	0.806186	-6.70387
ENSG00000092148	HECTD1	-0.125283	2.08677	-0.889035	0.3749	0.5163	-6.51414
ENSG00000092199	HNRNPC	0.331957	5.29991	3.3425	0.000966908	0.00503344	-1.518
ENSG00000092201	SUPT16H	-0.287811	0.759921	-2.08754	0.0379246	0.0920211	-4.62977
ENSG00000092203	TOX4	0.18213	2.247	1.55909	0.12033	0.222363	-5.70363
ENSG00000092208	GEMIN2	-0.315069	-0.495148	-1.29432	0.196835	0.321178	-5.70149
ENSG00000092330	TINF2	0.153594	2.43135	1.37536	0.17034	0.288809	-5.97957
ENSG00000092439	TRPM7	0.425597	1.26289	2.90159	0.00406785	0.0160946	-2.69226
ENSG00000092529	CAPN3	-0.249584	0.456363	-1.62903	0.104656	0.200084	-5.39705
ENSG00000092531	SNAP23	0.26011	3.18397	1.97505	0.0494413	0.112924	-5.01791
ENSG00000092621	PHGDH	-0.551161	-0.484275	-2.32367	0.0210033	0.0581259	-3.93033
ENSG00000092820	EZR	-0.32423	3.88058	-2.05761	0.0407386	0.0967272	-4.86519
ENSG00000092841	MYL6	-0.346346	6.66915	-3.37544	0.000863043	0.00461695	-1.39027
ENSG00000092847	AGO1	-0.2217	-0.0118843	-1.63906	0.102547	0.196932	-5.29379
ENSG00000092871	RFFL	0.103548	2.57987	0.703169	0.482651	0.61561	-6.68044
ENSG00000092929	UNC13D	-0.0229884	4.02859	-0.152195	0.879164	0.921573	-6.94179
ENSG00000092931	MFSD11	0.194707	1.3584	1.55706	0.12081	0.222957	-5.62934
ENSG00000092964	DPYSL2	-0.468344	1.63335	-2.82474	0.00514131	0.0193025	-2.98042
ENSG00000093000	NUP50	-0.00775318	2.4883	-0.0668309	0.946774	0.967311	-6.92301
ENSG00000093010	COMT	-0.713165	2.11878	-4.20717	3.68911e-05	0.0003538	1.56231
ENSG00000093072	ADA2	0.0432343	2.57146	0.267067	0.789653	0.860264	-6.89056
ENSG00000093134	VNN3	0.41732	2.9682	1.95977	0.0512125	0.11576	-5.03844
ENSG00000093144	ECHDC1	-0.190526	1.60188	-1.19579	0.232991	0.365567	-6.16251
ENSG00000093167	LRRFIP2	0.112814	2.54822	0.901373	0.368319	0.509232	-6.5205
ENSG00000093183	SEC22C	-0.311995	0.810542	-2.03193	0.043294	0.101642	-4.75095
ENSG00000094631	HDAC6	-0.131731	2.00239	-0.849255	0.39661	0.537851	-6.54076
ENSG00000094755	GABRP	-0.764485	0.918165	-2.4857	0.0136308	0.0415038	-3.80317
ENSG00000094916	CBX5	-0.256381	0.0265426	-2.07851	0.038755	0.0933914	-4.5168
ENSG00000094975	SUCO	0.536851	1.22952	3.22947	0.0014186	0.00687053	-1.7281
ENSG00000095015	MAP3K1	0.637063	1.58457	3.95229	0.000102618	0.00081531	0.688473
ENSG00000095059	DHPS	-0.46893	0.798626	-2.92415	0.00379406	0.0152631	-2.61666
ENSG00000095066	HOOK2	-0.430609	1.52767	-2.03676	0.0428025	0.100632	-4.83219
ENSG00000095139	ARCN1	0.0699792	1.97792	0.600888	0.548498	0.674842	-6.71108
ENSG00000095209	TMEM38B	-0.224846	0.539623	-1.21025	0.227406	0.358977	-6.00737
ENSG00000095261	PSMD5	0.34988	0.295817	1.80135	0.0729383	0.152216	-5.05825
ENSG00000095319	NUP188	-0.704647	0.958157	-3.94135	0.000107106	0.000843478	0.637692
ENSG00000095370	SH2D3C	0.114195	2.13021	0.712614	0.476796	0.610371	-6.64605
ENSG00000095380	NANS	-0.0588982	2.36516	-0.532033	0.595209	0.712293	-6.77913
ENSG00000095383	TBC1D2	0.182349	2.85285	0.943757	0.34627	0.486467	-6.49301
ENSG00000095397	WHRN	0.00320103	0.924712	0.0145752	0.988384	0.991839	-6.7669
ENSG00000095485	CWF19L1	0.140163	0.328351	0.863015	0.389015	0.530103	-6.28066
ENSG00000095564	BTAF1	0.117723	0.571161	0.812221	0.417492	0.557775	-6.36941
ENSG00000095787	WAC	0.650781	3.73543	5.21231	4.10259e-07	7.82672e-06	5.83396
ENSG00000095794	CREM	0.762728	4.61086	5.1351	5.9443e-07	1.07566e-05	5.47421
ENSG00000095906	NUBP2	-0.526722	0.253498	-3.25303	0.0013108	0.00645822	-1.5803
ENSG00000095951	HIVEP1	0.617052	3.24033	4.19813	3.8287e-05	0.000364702	1.51218
ENSG00000096060	FKBP5	0.453141	2.83039	1.82301	0.0695812	0.146484	-5.28539
ENSG00000096063	SRPK1	0.362318	3.06354	2.18787	0.0296715	0.0760621	-4.58059
ENSG00000096070	BRPF3	-0.155879	0.867964	-1.08018	0.281176	0.418934	-6.20172
ENSG00000096080	MRPS18A	0.0627953	0.0346894	0.321117	0.748409	0.830394	-6.55863
ENSG00000096093	EFHC1	-0.448619	2.26525	-1.83095	0.0683826	0.144486	-5.27095
ENSG00000096384	HSP90AB1	-0.352342	4.08365	-1.87968	0.0613978	0.132984	-5.20823
ENSG00000096696	DSP	-0.869286	-0.339166	-4.01177	8.1183e-05	0.000673009	1.07103
ENSG00000096717	SIRT1	0.603804	0.749456	3.83093	0.000164128	0.00119022	0.34153
ENSG00000096746	HNRNPH3	0.309669	2.84627	2.2315	0.0265984	0.0697482	-4.48036
ENSG00000096872	IFT74	0.159336	-0.371893	0.702937	0.482796	0.615707	-6.25751
ENSG00000096968	JAK2	1.08083	2.48265	6.46864	5.74272e-10	2.38529e-08	12.2276
ENSG00000096996	IL12RB1	0.385909	0.526293	2.41907	0.0163262	0.0476333	-3.82353
ENSG00000097033	SH3GLB1	0.673458	3.29555	4.09007	5.93889e-05	0.000524798	1.09729
ENSG00000099139	PCSK5	-1.80243	3.27869	-2.89362	0.00416881	0.0164085	-2.85505
ENSG00000099194	SCD	-2.85965	0.511228	-10.6749	6.38171e-22	4.48725e-19	39.1116
ENSG00000099203	TMED1	0.202073	0.686813	1.19466	0.233431	0.366024	-6.01688
ENSG00000099204	ABLIM1	-0.543629	0.277942	-2.42941	0.0158793	0.0465504	-3.81399
ENSG00000099246	RAB18	0.32546	2.43288	2.27781	0.0236428	0.063712	-4.36093
ENSG00000099250	NRP1	-1.21927	0.997146	-5.66335	4.34413e-08	1.12536e-06	8.0733
ENSG00000099282	TSPAN15	-1.54919	-0.523084	-6.55267	3.57711e-10	1.53769e-08	12.796
ENSG00000099290	WASHC2A	0.705772	1.93218	4.15359	4.59309e-05	0.000427357	1.40581
ENSG00000099308	MAST3	-0.256631	2.76862	-1.55653	0.120938	0.22311	-5.74039
ENSG00000099326	MZF1	-0.678697	-0.276388	-4.44508	1.35853e-05	0.000152878	2.75021
ENSG00000099330	OCEL1	-0.470163	-0.246988	-2.22722	0.0268872	0.0702995	-4.178
ENSG00000099331	MYO9B	-0.419292	4.47749	-3.32612	0.00102279	0.00527969	-1.5737
ENSG00000099337	KCNK6	0.00916554	1.24692	0.0431697	0.965603	0.979495	-6.81441
ENSG00000099338	CATSPERG	-0.277046	-0.149414	-1.25949	0.20911	0.335723	-5.82469
ENSG00000099341	PSMD8	-0.402844	2.56406	-3.17373	0.00170736	0.00801875	-2.0296
ENSG00000099364	FBXL19	-0.00869423	0.0850311	-0.0539127	0.957051	0.974022	-6.6145
ENSG00000099377	HSD3B7	-0.062825	0.911886	-0.346014	0.729644	0.816299	-6.72796
ENSG00000099622	CIRBP	-0.458911	3.05712	-3.03172	0.00270611	0.0117455	-2.46262
ENSG00000099624	ATP5F1D	-0.49299	1.55672	-2.85181	0.00473675	0.0180731	-2.9006
ENSG00000099725	PRKY	0.0198065	-0.72173	0.0855349	0.931909	0.95759	-6.46324
ENSG00000099783	HNRNPM	0.0275105	3.87126	0.266562	0.790042	0.860497	-6.91741
ENSG00000099785	MARCHF2	-0.174356	2.26079	-1.25881	0.209357	0.336036	-6.12929
ENSG00000099795	NDUFB7	-0.606263	1.53873	-2.69001	0.00766099	0.0266577	-3.33804
ENSG00000099797	TECR	-0.516389	2.08764	-2.98462	0.00314133	0.0131701	-2.57244
ENSG00000099800	TIMM13	-0.199645	-0.258136	-0.873698	0.383181	0.524673	-6.18208
ENSG00000099804	CDC34	-0.209026	1.65363	-1.45796	0.146195	0.257357	-5.82525
ENSG00000099810	MTAP	-0.3117	0.395257	-1.64205	0.101925	0.196082	-5.38025
ENSG00000099812	MISP	-0.385594	-0.362656	-1.52335	0.129025	0.233694	-5.42221
ENSG00000099817	POLR2E	-0.714234	2.21521	-4.44658	1.3498e-05	0.000152205	2.51016
ENSG00000099821	POLRMT	-0.556007	-0.10973	-2.78914	0.00572107	0.0209595	-2.85218
ENSG00000099860	GADD45B	0.252458	5.19663	1.61925	0.106744	0.202933	-5.65053
ENSG00000099875	MKNK2	-0.728389	3.73344	-4.01731	7.94172e-05	0.000660848	0.810519
ENSG00000099899	TRMT2A	-0.380265	1.15223	-2.11431	0.0355497	0.0876413	-4.63105
ENSG00000099901	RANBP1	-0.312756	1.19303	-1.68265	0.0937799	0.183569	-5.43342
ENSG00000099904	ZDHHC8	-1.20339	-0.00975309	-6.67918	1.74091e-10	8.19977e-09	13.4702
ENSG00000099910	KLHL22	-0.217805	0.702088	-1.39415	0.164599	0.281793	-5.79567
ENSG00000099917	MED15	-0.022292	3.34763	-0.217787	0.827786	0.887274	-6.92521
ENSG00000099940	SNAP29	0.192543	0.966482	1.59733	0.111545	0.209711	-5.50229
ENSG00000099942	CRKL	-0.0488394	1.25209	-0.414336	0.679009	0.774526	-6.73683
ENSG00000099949	LZTR1	-0.314682	1.00245	-2.04849	0.0416307	0.0985127	-4.74086
ENSG00000099956	SMARCB1	-0.177168	1.90372	-1.52608	0.128344	0.232845	-5.74249
ENSG00000099968	BCL2L13	0.408885	1.44594	2.58495	0.0103477	0.0335405	-3.55245
ENSG00000099977	DDT	0.168314	1.18931	0.874916	0.382519	0.52408	-6.42596
ENSG00000099985	OSM	0.169219	4.97454	0.670952	0.502914	0.634116	-6.72614
ENSG00000099991	CABIN1	-0.194606	1.3481	-1.17449	0.241395	0.374573	-6.16203
ENSG00000099992	TBC1D10A	-0.664152	0.420548	-4.10584	5.5735e-05	0.000498777	1.3146
ENSG00000099995	SF3A1	-0.364666	3.26291	-2.77076	0.00604301	0.0218562	-3.19177
ENSG00000099998	GGT5	0.602305	0.315478	2.34804	0.0197081	0.0551782	-3.91926
ENSG00000100014	SPECC1L	0.600281	1.06846	3.39662	0.000801835	0.00434173	-1.17609
ENSG00000100023	PPIL2	-0.448147	0.646037	-2.34333	0.0199528	0.0557839	-4.06298
ENSG00000100024	UPB1	0.417523	1.14762	1.39223	0.165178	0.282441	-5.82083
ENSG00000100028	SNRPD3	-0.248358	0.872291	-1.30048	0.194718	0.318988	-5.94609
ENSG00000100029	PES1	-0.300087	0.952345	-1.96991	0.0500313	0.113796	-4.88552
ENSG00000100030	MAPK1	-0.0338527	2.98085	-0.242832	0.808349	0.873191	-6.91272
ENSG00000100031	GGT1	-0.354349	1.59258	-1.70299	0.0899018	0.177592	-5.44228
ENSG00000100034	PPM1F	-0.3022	1.91877	-1.86714	0.0631359	0.135879	-5.17923
ENSG00000100055	CYTH4	0.135238	5.08515	0.826133	0.409572	0.54952	-6.60972
ENSG00000100060	MFNG	-0.519828	0.867086	-2.63654	0.00893768	0.029926	-3.41
ENSG00000100075	SLC25A1	-0.82097	0.530133	-5.10791	6.76704e-07	1.20461e-05	5.48447
ENSG00000100077	GRK3	-0.0428835	0.480185	-0.255295	0.79872	0.866689	-6.67122
ENSG00000100083	GGA1	-0.148331	3.19561	-1.09539	0.274475	0.411818	-6.35231
ENSG00000100084	HIRA	0.154594	0.0945617	0.849618	0.396408	0.537795	-6.24303
ENSG00000100092	SH3BP1	-0.0641761	2.05428	-0.487078	0.62666	0.736666	-6.78252
ENSG00000100097	LGALS1	-0.38542	5.41794	-2.14315	0.0331357	0.0830841	-4.67941
ENSG00000100099	HPS4	-0.160074	0.371816	-1.12461	0.261908	0.398119	-6.06098
ENSG00000100100	PIK3IP1	0.589941	1.96006	3.56986	0.000433553	0.00264594	-0.699646
ENSG00000100106	TRIOBP	-0.0468308	1.95351	-0.442791	0.658327	0.759383	-6.79541
ENSG00000100109	TFIP11	0.0562375	1.86867	0.422274	0.673214	0.770318	-6.79544
ENSG00000100121	GGTLC2	0.224265	0.760361	0.759994	0.448025	0.585218	-6.42333
ENSG00000100124	ANKRD54	-0.550247	0.0330695	-2.95054	0.00349523	0.0143392	-2.43429
ENSG00000100129	EIF3L	-0.443052	2.2226	-2.83405	0.00499877	0.0189043	-2.99576
ENSG00000100138	SNU13	-0.374525	1.32315	-2.12371	0.0347465	0.0860707	-4.6293
ENSG00000100139	MICALL1	-0.2632	1.03523	-1.83995	0.0670459	0.142533	-5.14095
ENSG00000100142	POLR2F	-0.21551	1.58903	-1.23988	0.216265	0.34438	-6.10755
ENSG00000100150	DEPDC5	-0.0663789	1.28138	-0.397973	0.691014	0.783861	-6.74681
ENSG00000100151	PICK1	-0.61828	-0.0827143	-3.14782	0.00185926	0.00860486	-1.84444
ENSG00000100162	CENPM	-0.927995	-0.297462	-3.31453	0.00106413	0.00546156	-1.31116
ENSG00000100201	DDX17	-0.0690978	4.68286	-0.741131	0.459359	0.594521	-6.67837
ENSG00000100207	TCF20	0.0831824	0.60752	0.580482	0.562149	0.686065	-6.55165
ENSG00000100211	CBY1	-0.590909	-0.207438	-2.6995	0.00745243	0.0261074	-3.0803
ENSG00000100216	TOMM22	-0.384362	0.148237	-2.57644	0.0105985	0.0342182	-3.42607
ENSG00000100219	XBP1	-0.0486935	3.61071	-0.292438	0.770211	0.846201	-6.90892
ENSG00000100220	RTCB	0.610637	1.29403	2.78765	0.00574648	0.0210448	-2.98809
ENSG00000100221	JOSD1	-0.327515	3.07485	-1.96658	0.0504161	0.114478	-5.03869
ENSG00000100225	FBXO7	0.144861	1.56685	1.00476	0.316052	0.455989	-6.34933
ENSG00000100226	GTPBP1	0.670591	5.18192	4.04211	7.19623e-05	0.000610687	0.906304
ENSG00000100227	POLDIP3	0.0750303	1.42504	0.551466	0.581842	0.701316	-6.68714
ENSG00000100239	PPP6R2	-0.11312	1.529	-1.06615	0.287459	0.424898	-6.29476
ENSG00000100241	SBF1	-0.363109	1.68148	-2.95926	0.00340142	0.0140597	-2.61075
ENSG00000100242	SUN2	0.340344	5.12328	2.41798	0.0163741	0.0477449	-4.07624
ENSG00000100243	CYB5R3	-0.635249	2.45455	-5.24732	3.46308e-07	6.79094e-06	6.00783
ENSG00000100258	LMF2	0.124399	1.5311	0.967139	0.334476	0.474709	-6.38106
ENSG00000100263	RHBDD3	-0.205382	-0.274877	-1.05268	0.293577	0.431983	-6.00676
ENSG00000100266	PACSIN2	-0.0901035	3.88228	-0.808068	0.419874	0.559529	-6.62856
ENSG00000100280	AP1B1	-0.082369	1.99132	-0.659517	0.510214	0.640386	-6.67976
ENSG00000100281	HMGXB4	0.0339222	0.341882	0.244529	0.807036	0.871964	-6.63321
ENSG00000100284	TOM1	0.241595	5.28398	1.78418	0.0756938	0.15654	-5.37388
ENSG00000100288	CHKB	0.0312078	2.13412	0.232496	0.816356	0.879332	-6.87494
ENSG00000100292	HMOX1	-0.665231	4.19881	-2.98788	0.00310922	0.0130688	-2.59277
ENSG00000100296	THOC5	0.121249	1.71269	0.834245	0.404996	0.545387	-6.51659
ENSG00000100297	MCM5	-0.178018	0.861525	-0.957391	0.339361	0.479705	-6.32157
ENSG00000100299	ARSA	-0.404746	1.40637	-3.08317	0.00229456	0.0101336	-2.23231
ENSG00000100300	TSPO	-0.649884	4.35947	-3.40223	0.000786328	0.00427422	-1.33054
ENSG00000100304	TTLL12	-0.346603	-0.0719104	-2.4673	0.0143328	0.0431738	-3.64032
ENSG00000100307	CBX7	-0.457269	-0.327067	-2.55709	0.0111892	0.0357038	-3.39579
ENSG00000100316	RPL3	-0.662174	4.60382	-3.93276	0.000110758	0.000866698	0.500714
ENSG00000100319	ZMAT5	0.138501	-0.178905	0.870224	0.385072	0.526338	-6.17985
ENSG00000100325	ASCC2	-0.0059742	2.16454	-0.0379593	0.969753	0.981353	-6.90687
ENSG00000100330	MTMR3	0.289754	3.13565	2.16778	0.0311865	0.0791848	-4.6267
ENSG00000100335	MIEF1	-0.696273	-0.114144	-3.96646	9.70712e-05	0.00077942	0.877717
ENSG00000100336	APOL4	1.13853	0.621852	4.03972	7.26492e-05	0.000615455	1.14658
ENSG00000100342	APOL1	1.51756	2.73667	6.02265	6.61661e-09	2.13554e-07	9.86154
ENSG00000100345	MYH9	-0.295684	5.71703	-2.94514	0.00355463	0.0145375	-2.70197
ENSG00000100348	TXN2	-0.143757	1.07745	-1.03238	0.30296	0.441567	-6.2803
ENSG00000100353	EIF3D	-0.175059	2.51664	-1.62631	0.105233	0.200767	-5.62171
ENSG00000100354	TNRC6B	0.188309	1.89112	1.23977	0.216304	0.34438	-6.11916
ENSG00000100359	SGSM3	-0.377799	1.20242	-2.05889	0.040615	0.0966033	-4.74574
ENSG00000100360	IFT27	-1.03133	-0.50494	-4.72846	3.91514e-06	5.33065e-05	3.93031
ENSG00000100364	KIAA0930	-0.293618	2.59908	-1.98793	0.0479876	0.110166	-4.98334
ENSG00000100365	NCF4	0.388806	4.04624	2.66048	0.00834427	0.0284127	-3.48289
ENSG00000100368	CSF2RB	0.888271	5.2062	5.74909	2.7929e-08	7.63704e-07	8.4224
ENSG00000100376	FAM118A	0.150684	1.17564	0.765661	0.444652	0.58199	-6.51299
ENSG00000100379	KCTD17	-0.315552	0.0391052	-1.52565	0.128451	0.232953	-5.48241
ENSG00000100380	ST13	-0.242131	2.79809	-1.80765	0.0719484	0.150565	-5.32656
ENSG00000100385	IL2RB	0.910364	0.44751	3.02522	0.0027627	0.0118968	-2.17256
ENSG00000100387	RBX1	0.162829	0.77544	0.850688	0.395814	0.537286	-6.38681
ENSG00000100393	EP300	0.363321	3.38711	2.66104	0.00833073	0.0283764	-3.47501
ENSG00000100401	RANGAP1	0.00634261	0.875616	0.0397758	0.968306	0.980906	-6.77526
ENSG00000100410	PHF5A	-0.0362402	0.64446	-0.214421	0.830406	0.888825	-6.70184
ENSG00000100412	ACO2	-0.591887	1.39148	-3.90187	0.000124898	0.00095162	0.462444
ENSG00000100413	POLR3H	-0.676015	-0.292105	-3.64269	0.000332429	0.00213049	-0.24099
ENSG00000100416	TRMU	-0.540748	0.428662	-3.26469	0.00126027	0.00625624	-1.57056
ENSG00000100418	DESI1	0.00399917	0.796042	0.0239563	0.980908	0.986923	-6.75786
ENSG00000100422	CERK	-0.242514	1.38487	-1.46019	0.145582	0.256554	-5.79229
ENSG00000100425	BRD1	-0.119107	0.972722	-0.843486	0.39982	0.540488	-6.43529
ENSG00000100429	HDAC10	-0.427445	0.98657	-3.22911	0.00142035	0.00687072	-1.75142
ENSG00000100439	ABHD4	-0.266354	0.739132	-1.3047	0.193279	0.317126	-5.93018
ENSG00000100441	KHNYN	-0.0761496	1.63066	-0.682007	0.495911	0.627716	-6.6339
ENSG00000100445	SDR39U1	-0.147179	-0.278218	-0.609053	0.543082	0.669773	-6.37731
ENSG00000100453	GZMB	3.14695	1.93834	6.82428	7.54039e-11	3.86602e-09	14.2987
ENSG00000100461	RBM23	0.173149	3.77819	1.29905	0.195209	0.31942	-6.11474
ENSG00000100462	PRMT5	-0.00241634	1.43736	-0.0142796	0.988619	0.991944	-6.84169
ENSG00000100478	AP4S1	-0.219471	0.559644	-1.38797	0.166471	0.284108	-5.78333
ENSG00000100485	SOS2	0.367229	1.85884	2.54574	0.0115492	0.0364509	-3.69009
ENSG00000100490	CDKL1	-1.02328	0.693568	-2.93652	0.00365121	0.0148095	-2.59766
ENSG00000100503	NIN	0.114384	3.18746	0.901813	0.368086	0.509196	-6.54113
ENSG00000100504	PYGL	-0.13414	3.62355	-0.689791	0.491011	0.622875	-6.71536
ENSG00000100519	PSMC6	0.164477	2.04767	1.36237	0.174395	0.293311	-5.97343
ENSG00000100523	DDHD1	0.0189174	0.372677	0.107914	0.914157	0.946263	-6.68207
ENSG00000100528	CNIH1	0.163588	1.07448	0.88239	0.378474	0.519714	-6.40913
ENSG00000100554	ATP6V1D	0.0522539	2.75008	0.461738	0.644699	0.750369	-6.8288
ENSG00000100564	PIGH	0.0374022	1.02807	0.256304	0.797942	0.866035	-6.75405
ENSG00000100567	PSMA3	0.634351	3.10093	5.16302	5.20085e-07	9.62352e-06	5.61672
ENSG00000100568	VTI1B	-0.29425	1.00831	-1.97167	0.0498286	0.113401	-4.89381
ENSG00000100578	KIAA0586	0.0125204	0.194329	0.067261	0.946432	0.967262	-6.62536
ENSG00000100591	AHSA1	-0.259954	2.60245	-1.50744	0.13305	0.239485	-5.8099
ENSG00000100592	DAAM1	-0.637087	0.0512548	-3.10634	0.00212875	0.00955124	-1.99968
ENSG00000100596	SPTLC2	1.02538	2.44914	5.30098	2.6666e-07	5.40123e-06	6.29639
ENSG00000100599	AL159141.1	-0.08751	3.14719	-0.596865	0.551176	0.676962	-6.76918
ENSG00000100600	LGMN	0.756931	3.32106	3.41998	0.00073906	0.00404858	-1.26106
ENSG00000100603	SNW1	0.151228	1.82169	1.17717	0.240328	0.373743	-6.18811
ENSG00000100605	ITPK1	0.281061	2.83217	2.15885	0.0318817	0.0805968	-4.63625
ENSG00000100612	DHRS7	0.0898934	2.62418	0.642296	0.521311	0.650994	-6.72353
ENSG00000100614	PPM1A	0.294746	2.11705	2.18844	0.0296293	0.0759757	-4.53775
ENSG00000100632	ERH	0.13394	2.03617	0.718594	0.47311	0.607447	-6.63392
ENSG00000100644	HIF1A	0.53444	5.83915	3.32829	0.00101521	0.00524881	-1.55766
ENSG00000100647	SUSD6	0.559448	4.07017	3.94304	0.000106398	0.000840598	0.536221
ENSG00000100650	SRSF5	0.101988	4.08638	0.811124	0.418121	0.558477	-6.62615
ENSG00000100664	EIF5	-0.00115569	4.03787	-0.0108156	0.99138	0.993904	-6.95298
ENSG00000100697	DICER1	0.329255	2.66852	2.47483	0.0140417	0.0424919	-3.9177
ENSG00000100711	ZFYVE21	-0.828401	0.0338008	-4.2762	2.77285e-05	0.000280245	2.0246
ENSG00000100714	MTHFD1	-0.58763	0.472164	-3.11114	0.00209583	0.00944227	-2.04809
ENSG00000100722	ZC3H14	-0.0483804	0.908283	-0.282323	0.777946	0.851941	-6.74156
ENSG00000100726	TELO2	-0.480083	0.127906	-2.87346	0.00443445	0.0171996	-2.66274
ENSG00000100731	PCNX1	0.161727	4.10237	1.17584	0.240855	0.374266	-6.26711
ENSG00000100744	GSKIP	0.34145	0.148908	1.77422	0.0773303	0.158889	-5.06018
ENSG00000100749	VRK1	0.0293066	0.575501	0.157268	0.875169	0.919422	-6.69405
ENSG00000100764	PSMC1	-0.0261402	2.6766	-0.220672	0.825541	0.885736	-6.90891
ENSG00000100767	PAPLN	0.0685145	-0.200236	0.3692	0.712314	0.801373	-6.48519
ENSG00000100796	PPP4R3A	0.231124	2.24637	2.06299	0.0402202	0.0959824	-4.80673
ENSG00000100802	C14orf93	0.664351	-0.0407656	2.81414	0.00530803	0.0197476	-2.68648
ENSG00000100804	PSMB5	-0.0678563	0.732033	-0.381916	0.702871	0.793926	-6.68131
ENSG00000100811	YY1	0.0396317	1.7928	0.309832	0.756965	0.836784	-6.83121
ENSG00000100813	ACIN1	0.141934	3.48286	1.36916	0.172266	0.290922	-6.0204
ENSG00000100815	TRIP11	0.526123	0.34722	3.27972	0.00119786	0.00600934	-1.43429
ENSG00000100823	APEX1	-0.506361	0.776828	-2.59875	0.00995229	0.0325034	-3.48879
ENSG00000100836	PABPN1	0.0140707	2.32646	0.124635	0.90092	0.937292	-6.90848
ENSG00000100852	ARHGAP5	-0.210125	0.131935	-1.08615	0.278534	0.416257	-6.06554
ENSG00000100865	CINP	-0.194801	0.679945	-1.37295	0.171086	0.289625	-5.81584
ENSG00000100883	SRP54	0.616904	2.10711	4.26005	2.96529e-05	0.000296649	1.8045
ENSG00000100888	CHD8	0.120142	2.02419	1.27566	0.203345	0.328723	-6.08676
ENSG00000100889	PCK2	0.15732	0.871663	0.877954	0.380872	0.522259	-6.37458
ENSG00000100890	PRORP	0.00650373	0.211562	0.0378132	0.969869	0.981353	-6.63613
ENSG00000100897	DCAF11	0.13251	2.08032	1.23951	0.2164	0.344476	-6.13458
ENSG00000100902	PSMA6	0.230884	3.74854	1.74722	0.0819151	0.165784	-5.44193
ENSG00000100906	NFKBIA	0.673873	7.8312	3.7478	0.000224919	0.00154508	-0.129851
ENSG00000100908	EMC9	0.617518	-0.41526	2.5818	0.0104398	0.0337947	-3.2346
ENSG00000100911	PSME2	0.894293	3.72688	5.17863	4.82545e-07	9.01361e-06	5.68058
ENSG00000100918	REC8	0.935531	2.83051	5.9211	1.1354e-08	3.37669e-07	9.31919
ENSG00000100926	TM9SF1	-0.208643	1.40155	-1.49789	0.135512	0.243249	-5.73662
ENSG00000100934	SEC23A	-0.499812	1.64425	-3.59467	0.000396228	0.00246865	-0.635689
ENSG00000100938	GMPR2	0.244778	3.1765	1.87702	0.0617631	0.133655	-5.20319
ENSG00000100941	PNN	0.0210857	1.51992	0.138075	0.8903	0.929584	-6.84149
ENSG00000100949	RABGGTA	-0.0056688	1.04401	-0.038111	0.969632	0.981353	-6.79666
ENSG00000100979	PLTP	-0.349451	0.950547	-1.36282	0.174252	0.293228	-5.8835
ENSG00000100982	PCIF1	-0.0793585	1.06884	-0.622068	0.534504	0.661927	-6.60335
ENSG00000100983	GSS	-0.792915	0.925432	-5.24391	3.5209e-07	6.88322e-06	6.07336
ENSG00000100985	MMP9	0.341232	3.15965	1.05317	0.29335	0.431715	-6.38951
ENSG00000100991	TRPC4AP	0.305955	2.17377	2.63969	0.00885746	0.0297383	-3.48323
ENSG00000100994	PYGB	-0.450631	0.392616	-2.6334	0.00901846	0.0300534	-3.32668
ENSG00000100997	ABHD12	-0.32749	1.81157	-1.81096	0.0714324	0.149772	-5.27382
ENSG00000101000	PROCR	-0.257518	0.0556954	-0.930126	0.353267	0.493551	-6.21857
ENSG00000101017	CD40	0.444087	1.35506	2.20726	0.0282696	0.0732718	-4.41929
ENSG00000101019	UQCC1	-0.212213	0.235591	-1.10151	0.27181	0.408386	-6.08084
ENSG00000101040	ZMYND8	0.20146	0.470026	1.0775	0.282368	0.420142	-6.11316
ENSG00000101052	IFT52	0.186945	-0.450491	0.774983	0.439134	0.577379	-6.18952
ENSG00000101084	RAB5IF	0.487849	3.77621	3.42901	0.00071605	0.00395778	-1.24261
ENSG00000101104	PABPC1L	-0.130244	1.25772	-0.936216	0.350129	0.490281	-6.39145
ENSG00000101109	STK4	0.276369	3.35565	2.02786	0.0437103	0.102375	-4.91801
ENSG00000101126	ADNP	0.232998	0.799224	1.48645	0.138509	0.247305	-5.64492
ENSG00000101138	CSTF1	0.0189283	0.517994	0.109237	0.913108	0.945575	-6.68893
ENSG00000101146	RAE1	0.348321	-0.00133468	2.17011	0.031008	0.0788945	-4.27183
ENSG00000101150	TPD52L2	0.0712483	3.59769	0.59926	0.549581	0.675583	-6.7725
ENSG00000101152	DNAJC5	0.0478508	2.53672	0.378133	0.705676	0.796464	-6.85433
ENSG00000101158	NELFCD	-0.122695	1.48103	-1.19854	0.231923	0.364529	-6.14316
ENSG00000101160	CTSZ	-0.382834	5.04319	-2.05257	0.0412301	0.0977057	-4.86933
ENSG00000101161	PRPF6	-0.137565	0.921064	-1.15913	0.247587	0.381594	-6.11824
ENSG00000101166	PRELID3B	-0.0235695	1.18854	-0.170632	0.864661	0.91149	-6.79995
ENSG00000101181	MTG2	-0.205973	1.08634	-1.46401	0.144536	0.255213	-5.75861
ENSG00000101182	PSMA7	-0.341019	3.60985	-2.43306	0.0157241	0.0462467	-4.04366
ENSG00000101187	SLCO4A1	0.88102	2.42844	3.58616	0.000408683	0.00252389	-0.667321
ENSG00000101191	DIDO1	0.0112067	0.869362	0.104434	0.916915	0.947928	-6.75976
ENSG00000101193	GID8	-0.204637	0.0758882	-1.1215	0.263228	0.399571	-6.0252
ENSG00000101199	ARFGAP1	-0.295503	1.87676	-2.41022	0.0167173	0.0485444	-4.04311
ENSG00000101224	CDC25B	0.411118	-0.152698	1.86027	0.0641044	0.137482	-4.83428
ENSG00000101236	RNF24	0.927638	2.77851	5.28473	2.8869e-07	5.80591e-06	6.20097
ENSG00000101246	ARFRP1	0.0652728	1.16703	0.439848	0.660454	0.761212	-6.70765
ENSG00000101255	TRIB3	0.0239818	0.560777	0.114573	0.908882	0.942388	-6.70273
ENSG00000101265	RASSF2	0.618309	3.52936	3.33087	0.00100629	0.00522012	-1.55285
ENSG00000101266	CSNK2A1	-0.462819	1.69425	-3.62794	0.000350918	0.00222723	-0.527101
ENSG00000101290	CDS2	0.753748	2.10425	5.02669	9.93662e-07	1.6579e-05	5.04463
ENSG00000101294	HM13	0.53197	4.0079	4.04641	7.07394e-05	0.000602021	0.920869
ENSG00000101307	SIRPB1	0.088271	3.86712	0.448365	0.654306	0.756339	-6.85266
ENSG00000101310	SEC23B	-0.0265399	1.92765	-0.216006	0.829172	0.888082	-6.86761
ENSG00000101336	HCK	0.349276	5.27238	2.54919	0.0114387	0.0362299	-3.7592
ENSG00000101337	TM9SF4	-0.196894	1.93475	-1.36271	0.174286	0.293228	-5.97806
ENSG00000101342	TLDC2	1.81287	-0.0572796	5.01753	1.03733e-06	1.71334e-05	5.27364
ENSG00000101343	CRNKL1	0.536329	0.156415	3.05497	0.00251236	0.0110016	-2.05511
ENSG00000101347	SAMHD1	0.638046	4.43327	3.49811	0.000560931	0.00325963	-1.01857
ENSG00000101350	KIF3B	-0.0856233	0.242521	-0.66362	0.507588	0.637822	-6.44283
ENSG00000101361	NOP56	-0.0412924	1.64444	-0.249777	0.80298	0.869203	-6.83528
ENSG00000101363	MANBAL	-0.0496281	0.113977	-0.31217	0.75519	0.835291	-6.57274
ENSG00000101365	IDH3B	0.0578031	1.00056	0.384292	0.701112	0.792558	-6.71373
ENSG00000101367	MAPRE1	-0.0440954	2.90547	-0.369867	0.711817	0.800998	-6.87241
ENSG00000101384	JAG1	0.278927	0.669651	1.65596	0.0990745	0.191421	-5.36851
ENSG00000101413	RPRD1B	0.00615007	1.13788	0.0414621	0.966963	0.980509	-6.80632
ENSG00000101421	CHMP4B	0.157732	3.82954	1.24454	0.214551	0.342864	-6.18398
ENSG00000101425	BPI	-0.0115417	-0.246532	-0.0461272	0.963248	0.978153	-6.55177
ENSG00000101439	CST3	-0.364373	5.04159	-1.84124	0.0668553	0.142329	-5.27208
ENSG00000101443	WFDC2	-0.331036	3.14056	-0.745078	0.456974	0.592994	-6.67168
ENSG00000101444	AHCY	-0.344841	0.440799	-2.17438	0.0306817	0.0782059	-4.41489
ENSG00000101445	PPP1R16B	0.514691	-0.528076	1.88802	0.0602638	0.131073	-4.68151
ENSG00000101457	DNTTIP1	0.168527	2.17937	1.0826	0.280105	0.417844	-6.32006
ENSG00000101460	MAP1LC3A	-0.298309	1.61661	-1.43247	0.153348	0.266864	-5.85681
ENSG00000101473	ACOT8	0.142298	-0.0452442	0.816997	0.414763	0.554972	-6.26539
ENSG00000101474	APMAP	-0.124222	2.21987	-0.726249	0.468414	0.603543	-6.64905
ENSG00000101493	ZNF516	0.0779066	1.96415	0.471365	0.63782	0.74507	-6.77626
ENSG00000101544	ADNP2	0.188094	1.2651	0.788785	0.431038	0.570003	-6.49485
ENSG00000101557	USP14	-0.202672	0.391662	-1.33586	0.182895	0.304669	-5.8196
ENSG00000101558	VAPA	-0.336374	4.01573	-2.75485	0.00633479	0.0226988	-3.23721
ENSG00000101577	LPIN2	0.212208	2.30314	1.33387	0.183546	0.305104	-6.02675
ENSG00000101596	SMCHD1	1.17979	4.93823	6.40885	8.02299e-10	3.18461e-08	11.8624
ENSG00000101608	MYL12A	0.623447	5.72171	5.56352	7.22279e-08	1.74268e-06	7.50946
ENSG00000101654	RNMT	0.102415	0.620583	0.560973	0.575354	0.696054	-6.56156
ENSG00000101665	SMAD7	-0.0202647	0.947649	-0.126022	0.899823	0.936548	-6.77119
ENSG00000101745	ANKRD12	0.530742	3.58832	4.05761	6.76459e-05	0.000582086	0.96707
ENSG00000101751	POLI	0.332308	0.314789	1.59798	0.1114	0.20956	-5.38935
ENSG00000101773	RBBP8	0.39681	0.60448	2.11225	0.035728	0.0879486	-4.50161
ENSG00000101782	RIOK3	-0.129847	2.52955	-1.07908	0.281667	0.419348	-6.35098
ENSG00000101843	PSMD10	-0.278802	0.802617	-1.60924	0.108916	0.206186	-5.50164
ENSG00000101849	TBL1X	-0.129644	1.93565	-0.881869	0.378755	0.520009	-6.51051
ENSG00000101856	PGRMC1	-0.15295	0.027022	-0.799556	0.424781	0.564235	-6.30226
ENSG00000101882	NKAP	0.0787857	0.304573	0.495833	0.620479	0.732022	-6.53004
ENSG00000101901	ALG13	0.157709	1.56366	0.771042	0.441462	0.579433	-6.54658
ENSG00000101911	PRPS2	0.0509379	0.237311	0.248752	0.803772	0.869678	-6.6112
ENSG00000101916	TLR8	1.29307	2.27798	5.60353	5.89594e-08	1.45828e-06	7.77179
ENSG00000101940	WDR13	-0.394717	2.05386	-2.61141	0.00960137	0.0315996	-3.56839
ENSG00000101966	XIAP	0.617945	2.11117	3.46723	0.000625892	0.00356762	-1.05293
ENSG00000101972	STAG2	0.290304	3.20137	2.01332	0.0452295	0.105194	-4.94281
ENSG00000101974	ATP11C	0.785074	0.307928	4.03454	7.41636e-05	0.000625233	1.1683
ENSG00000101986	ABCD1	0.640652	1.12619	4.11243	5.42713e-05	0.000487007	1.32972
ENSG00000102007	PLP2	0.214092	3.63596	1.18888	0.235695	0.3684	-6.24911
ENSG00000102030	NAA10	0.0399191	1.75166	0.27882	0.78063	0.85394	-6.83442
ENSG00000102032	RENBP	0.257565	2.88216	1.48311	0.139394	0.248587	-5.84552
ENSG00000102034	ELF4	0.663687	2.38735	4.75703	3.44253e-06	4.77973e-05	3.83529
ENSG00000102054	RBBP7	-0.0145269	0.904189	-0.0885186	0.92954	0.956154	-6.76407
ENSG00000102081	FMR1	0.484199	3.00146	3.36868	0.000883458	0.00468576	-1.42222
ENSG00000102096	PIM2	0.847782	3.04059	4.18515	4.03783e-05	0.000381829	1.47311
ENSG00000102100	SLC35A2	0.0787219	0.810869	0.41883	0.675725	0.771988	-6.66298
ENSG00000102103	PQBP1	0.0108666	1.31102	0.0724161	0.942333	0.964375	-6.82512
ENSG00000102119	EMD	-0.476762	2.28596	-2.73194	0.00677769	0.0240518	-3.27188
ENSG00000102125	TAZ	-0.252595	0.900288	-1.78834	0.0750174	0.155418	-5.21248
ENSG00000102144	PGK1	-0.0701069	4.38674	-0.592361	0.554182	0.679785	-6.77842
ENSG00000102158	MAGT1	-0.0668318	1.44969	-0.550516	0.582492	0.701756	-6.70112
ENSG00000102172	SMS	-0.310544	1.52501	-2.23273	0.0265159	0.0696061	-4.41696
ENSG00000102181	CD99L2	-0.529358	0.365282	-3.91356	0.000119354	0.000920784	0.626034
ENSG00000102189	EEA1	-0.128618	0.150319	-0.823715	0.410942	0.550888	-6.31588
ENSG00000102218	RP2	0.661697	1.97656	4.47428	1.19827e-05	0.000137801	2.67703
ENSG00000102225	CDK16	-0.250881	1.86777	-1.85884	0.0643085	0.137845	-5.18643
ENSG00000102226	USP11	-0.254056	1.06633	-1.68105	0.0940915	0.184069	-5.42056
ENSG00000102265	TIMP1	-0.242094	6.77921	-1.22681	0.221129	0.350757	-6.17547
ENSG00000102316	MAGED2	0.0353277	1.06045	0.186511	0.852206	0.904239	-6.78213
ENSG00000102317	RBM3	-0.0350045	2.56708	-0.206579	0.836519	0.893339	-6.90785
ENSG00000102390	PBDC1	-0.13515	-0.0350267	-0.673684	0.501179	0.632476	-6.38223
ENSG00000102393	GLA	0.511149	2.96683	2.80958	0.00538129	0.0199824	-3.07083
ENSG00000102401	ARMCX3	0.0259704	1.54565	0.187515	0.85142	0.903847	-6.83535
ENSG00000102445	RUBCNL	-0.567241	2.65533	-2.34959	0.0196283	0.0550281	-4.22417
ENSG00000102524	TNFSF13B	1.80677	4.0632	7.7059	3.70398e-13	3.37611e-11	19.3548
ENSG00000102531	FNDC3A	0.409112	2.39607	3.13408	0.00194487	0.00891722	-2.12458
ENSG00000102543	CDADC1	0.997846	0.605322	4.42376	1.48827e-05	0.00016517	2.6523
ENSG00000102547	CAB39L	0.113119	-0.250845	0.468545	0.639832	0.746815	-6.42019
ENSG00000102554	KLF5	-0.00828882	1.54599	-0.0308078	0.975449	0.984147	-6.86172
ENSG00000102572	STK24	0.146556	3.01034	1.17876	0.239692	0.372872	-6.25024
ENSG00000102575	ACP5	-1.28831	2.71166	-5.06664	8.23016e-07	1.42386e-05	5.16754
ENSG00000102580	DNAJC3	0.0947895	2.13771	0.669812	0.50364	0.634643	-6.68041
ENSG00000102595	UGGT2	-0.341165	0.0870411	-1.52738	0.128021	0.23243	-5.51178
ENSG00000102606	ARHGEF7	-0.180376	1.55064	-1.51031	0.132317	0.238515	-5.73606
ENSG00000102699	PARP4	0.568109	2.43483	3.65882	0.000313252	0.00203425	-0.432446
ENSG00000102710	SUPT20H	0.107085	1.75711	0.744678	0.457215	0.593108	-6.59502
ENSG00000102755	FLT1	-0.0440586	0.874404	-0.247917	0.804417	0.870104	-6.74438
ENSG00000102760	RGCC	-0.804028	3.06895	-3.14959	0.00184851	0.00857162	-2.1143
ENSG00000102786	INTS6	-0.00678346	2.32007	-0.0546222	0.956486	0.973672	-6.91483
ENSG00000102794	ACOD1	2.88915	1.88068	5.67559	4.07979e-08	1.05967e-06	8.24586
ENSG00000102796	DHRS12	-0.0388747	0.848722	-0.182323	0.855488	0.906016	-6.74811
ENSG00000102804	TSC22D1	-0.330843	1.30917	-1.73664	0.0837699	0.168602	-5.36047
ENSG00000102805	CLN5	-0.206375	1.80105	-1.10133	0.271887	0.408433	-6.2891
ENSG00000102854	MSLN	-1.13579	-0.0866064	-4.00914	8.20329e-05	0.000679169	1.01354
ENSG00000102858	MGRN1	-0.218476	3.14552	-1.91865	0.0562486	0.124123	-5.13008
ENSG00000102871	TRADD	-0.117037	0.917389	-0.809282	0.419177	0.559009	-6.45697
ENSG00000102879	CORO1A	0.375496	5.23894	2.46071	0.0145915	0.0436238	-3.97445
ENSG00000102882	MAPK3	-0.238835	2.39608	-1.78546	0.0754855	0.156267	-5.3511
ENSG00000102886	GDPD3	-0.535218	-0.480745	-2.48204	0.0137681	0.0418829	-3.53881
ENSG00000102893	PHKB	0.0247185	1.65664	0.191703	0.848141	0.901631	-6.85006
ENSG00000102897	LYRM1	0.73384	2.3425	4.83757	2.38795e-06	3.5509e-05	4.19195
ENSG00000102898	NUTF2	-0.579744	1.1114	-3.45131	0.000662076	0.00371598	-1.06855
ENSG00000102900	NUP93	-0.400106	1.07363	-2.61367	0.00953994	0.0314716	-3.47824
ENSG00000102901	CENPT	-0.446476	0.231194	-2.61293	0.00955992	0.0315163	-3.3492
ENSG00000102908	NFAT5	0.169355	2.16268	1.54423	0.123887	0.226935	-5.72196
ENSG00000102910	LONP2	-0.250331	0.427446	-1.96584	0.0505022	0.114531	-4.81522
ENSG00000102921	N4BP1	0.818755	4.25581	4.60375	6.81767e-06	8.4846e-05	3.13993
ENSG00000102931	ARL2BP	-0.467954	0.283022	-1.94176	0.0533694	0.119429	-4.84589
ENSG00000102974	CTCF	-0.158986	0.786814	-1.55181	0.122062	0.224595	-5.57229
ENSG00000102978	POLR2C	-0.040795	1.05615	-0.316948	0.751566	0.832376	-6.75097
ENSG00000103005	USB1	0.124959	3.39799	1.02096	0.308328	0.447601	-6.43091
ENSG00000103018	CYB5B	-0.0382174	0.611161	-0.232961	0.815996	0.879067	-6.69151
ENSG00000103035	PSMD7	0.135056	2.00351	1.17223	0.242301	0.375624	-6.20849
ENSG00000103042	SLC38A7	0.133746	0.493232	0.729484	0.466437	0.601389	-6.42818
ENSG00000103043	VAC14	-0.319818	1.74347	-2.1294	0.034268	0.0851638	-4.65471
ENSG00000103047	TANGO6	-0.468525	0.305017	-2.0566	0.040837	0.0969375	-4.62741
ENSG00000103051	COG4	0.251084	0.451695	1.52771	0.12794	0.232347	-5.52982
ENSG00000103056	SMPD3	-0.529482	-0.370039	-2.15738	0.0319976	0.0808481	-4.29814
ENSG00000103064	SLC7A6	-0.247292	0.575925	-1.34738	0.179165	0.299796	-5.83803
ENSG00000103066	PLA2G15	-1.24368	0.734078	-6.62565	2.36366e-10	1.06733e-08	13.1261
ENSG00000103091	WDR59	-0.442568	1.09595	-2.23247	0.0265336	0.0696154	-4.3774
ENSG00000103111	MON1B	-0.309194	2.0363	-2.47595	0.013999	0.0423871	-3.89884
ENSG00000103121	CMC2	0.630272	1.70646	3.30191	0.00111092	0.00565456	-1.55013
ENSG00000103126	AXIN1	-0.158323	0.602512	-1.28392	0.200444	0.325123	-5.92087
ENSG00000103145	HCFC1R1	-0.243574	0.209162	-1.23764	0.217094	0.345358	-5.90913
ENSG00000103152	MPG	-0.202261	0.0839165	-1.12092	0.263475	0.399761	-6.00659
ENSG00000103160	HSDL1	0.137479	0.630205	0.710948	0.477826	0.61135	-6.4521
ENSG00000103168	TAF1C	0.245505	1.7124	0.957232	0.339441	0.479749	-6.39098
ENSG00000103174	NAGPA	-0.543524	0.311444	-3.04114	0.00262602	0.0114433	-2.23281
ENSG00000103187	COTL1	-0.143156	5.31006	-1.17249	0.242194	0.375576	-6.26325
ENSG00000103194	USP10	-0.174816	3.27141	-1.13797	0.256302	0.391532	-6.30614
ENSG00000103196	CRISPLD2	0.371355	2.1399	2.15136	0.0324745	0.0816965	-4.61059
ENSG00000103197	TSC2	-0.307958	2.43417	-2.14051	0.0333507	0.0834749	-4.67233
ENSG00000103222	ABCC1	0.157379	1.63314	1.19523	0.233209	0.365734	-6.14844
ENSG00000103226	NOMO3	-0.568509	1.20886	-2.49373	0.0133343	0.0407648	-3.79727
ENSG00000103245	CIAO3	-0.474048	-0.0495902	-2.52595	0.0122016	0.0380424	-3.52292
ENSG00000103248	MTHFSD	-0.40467	0.12854	-2.13731	0.0336129	0.0838747	-4.42262
ENSG00000103249	CLCN7	0.486905	3.95856	2.38744	0.0177631	0.0508758	-4.14932
ENSG00000103254	ANTKMT	-0.826537	-0.470045	-3.76549	0.000210423	0.00146182	0.208546
ENSG00000103257	SLC7A5	0.607199	3.16465	3.45742	0.000647962	0.00366583	-1.13688
ENSG00000103264	FBXO31	-1.06961	-0.410049	-5.04655	9.04923e-07	1.53435e-05	5.30801
ENSG00000103266	STUB1	-0.49985	1.14187	-2.4816	0.0137848	0.0419208	-3.82003
ENSG00000103274	NUBP1	-0.0169957	0.688235	-0.0951924	0.924244	0.952983	-6.7386
ENSG00000103275	UBE2I	0.0930836	2.09185	0.71039	0.478171	0.611473	-6.64824
ENSG00000103313	MEFV	1.00369	3.91307	5.96648	8.92677e-09	2.7461e-07	9.52866
ENSG00000103326	CAPN15	-0.360019	1.47003	-2.25876	0.0248224	0.0662739	-4.35798
ENSG00000103335	PIEZO1	-0.372952	1.5792	-2.25355	0.0251533	0.0669395	-4.37795
ENSG00000103342	GSPT1	-0.306939	1.71323	-2.17593	0.0305642	0.0779871	-4.55365
ENSG00000103351	CLUAP1	-0.747354	-0.296425	-3.1442	0.00188148	0.00867913	-1.82944
ENSG00000103353	UBFD1	-0.0653396	0.767517	-0.359395	0.719624	0.807752	-6.69072
ENSG00000103363	ELOB	-0.480173	3.05046	-2.83936	0.00491912	0.0186389	-3.00425
ENSG00000103365	GGA2	-0.633032	1.99834	-3.87963	0.000136119	0.00102287	0.337409
ENSG00000103381	CPPED1	0.246424	2.22044	1.43496	0.152638	0.266083	-5.88035
ENSG00000103415	HMOX2	-0.902666	0.884993	-6.01269	6.97864e-09	2.22323e-07	9.84382
ENSG00000103423	DNAJA3	-0.675562	0.263454	-3.33736	0.000984131	0.00511499	-1.32707
ENSG00000103429	BFAR	0.143237	1.30905	1.15083	0.250982	0.385258	-6.16431
ENSG00000103479	RBL2	-0.0660083	1.7718	-0.586738	0.557947	0.682736	-6.70874
ENSG00000103490	PYCARD	-0.173686	3.06402	-1.05396	0.292989	0.431432	-6.39329
ENSG00000103495	MAZ	-0.402944	2.10418	-2.50314	0.0129942	0.0399016	-3.83926
ENSG00000103496	STX4	0.0513432	4.08463	0.365059	0.715398	0.804384	-6.88693
ENSG00000103502	CDIPT	0.235616	1.28181	1.70209	0.0900696	0.177863	-5.38039
ENSG00000103507	BCKDK	-0.332119	1.95805	-2.56492	0.0109465	0.0350876	-3.67671
ENSG00000103510	KAT8	-0.372645	1.79847	-3.0444	0.00259876	0.0113346	-2.37673
ENSG00000103512	NOMO1	-0.199609	0.648424	-1.06751	0.286844	0.424616	-6.17785
ENSG00000103534	TMC5	-1.18758	0.321396	-4.2755	2.78092e-05	0.000280773	1.9685
ENSG00000103544	VPS35L	-0.093221	1.49255	-0.620504	0.535532	0.662779	-6.6631
ENSG00000103549	RNF40	-0.183997	2.3623	-1.51165	0.131977	0.237945	-5.79142
ENSG00000103569	AQP9	0.596325	7.03181	3.72538	0.000244643	0.00166087	-0.219561
ENSG00000103591	AAGAB	0.339044	0.844931	2.08505	0.0381517	0.0924779	-4.60407
ENSG00000103642	LACTB	0.965641	2.67014	5.94816	9.83852e-09	2.98001e-07	9.46411
ENSG00000103653	CSK	0.195818	3.66279	1.53311	0.126602	0.23062	-5.78698
ENSG00000103657	HERC1	-0.0315678	2.05613	-0.257936	0.796684	0.865242	-6.86741
ENSG00000103671	TRIP4	0.282476	1.05885	1.94888	0.0525081	0.117984	-4.90782
ENSG00000103723	AP3B2	-0.1693	0.58064	-0.710203	0.478287	0.611542	-6.46822
ENSG00000103769	RAB11A	0.422966	3.32935	3.26883	0.0012428	0.00619134	-1.74588
ENSG00000103811	CTSH	-0.127598	4.16683	-0.782115	0.434939	0.573703	-6.64925
ENSG00000103855	CD276	-1.50051	0.950906	-7.57651	8.27517e-13	6.56942e-11	18.6058
ENSG00000103876	FAH	-0.923747	-0.0923528	-4.2115	3.62398e-05	0.000349065	1.78183
ENSG00000103888	CEMIP	0.82233	0.48766	2.73501	0.00671673	0.0238699	-2.97737
ENSG00000103932	RPAP1	-0.45645	-0.0986074	-2.07479	0.0391019	0.0940662	-4.5278
ENSG00000103942	HOMER2	-0.99297	-0.527102	-4.63129	6.0376e-06	7.62955e-05	3.52794
ENSG00000103966	EHD4	-0.338803	1.06765	-2.54815	0.0114717	0.0362761	-3.63442
ENSG00000103978	TMEM87A	0.12713	1.32688	1.04223	0.298382	0.437208	-6.28713
ENSG00000103994	ZNF106	-0.10029	2.37273	-0.828899	0.408009	0.54802	-6.58086
ENSG00000103995	CEP152	-0.341143	-0.343125	-1.45555	0.146859	0.258261	-5.50734
ENSG00000104043	ATP8B4	0.557846	1.33246	2.88274	0.00431029	0.0168708	-2.73432
ENSG00000104047	DTWD1	0.0152028	0.926069	0.0767918	0.938855	0.961916	-6.76867
ENSG00000104064	GABPB1	0.282236	1.09659	1.68701	0.0929365	0.182208	-5.38121
ENSG00000104067	TJP1	-0.832883	-0.245564	-4.14623	4.73261e-05	0.000437231	1.55703
ENSG00000104081	BMF	-0.0799844	0.51817	-0.390344	0.696638	0.788605	-6.63134
ENSG00000104093	DMXL2	0.748668	3.85343	4.32017	2.30743e-05	0.000237846	1.98286
ENSG00000104129	DNAJC17	-0.0585498	0.270119	-0.253024	0.800473	0.867569	-6.63408
ENSG00000104131	EIF3J	0.0708007	1.8803	0.508928	0.611283	0.72449	-6.75577
ENSG00000104133	SPG11	0.39871	3.34976	3.40009	0.000792218	0.00429911	-1.33134
ENSG00000104142	VPS18	0.0602422	1.42216	0.42036	0.674609	0.771206	-6.75218
ENSG00000104154	SLC30A4	0.620876	0.695621	3.08368	0.00229079	0.0101214	-2.07695
ENSG00000104164	BLOC1S6	-0.0533411	3.47285	-0.228883	0.81916	0.88139	-6.92406
ENSG00000104177	MYEF2	-0.0379207	0.525644	-0.145626	0.884342	0.924932	-6.68847
ENSG00000104205	SGK3	0.333613	2.26788	2.10696	0.0361887	0.0887497	-4.71674
ENSG00000104219	ZDHHC2	0.237388	0.677015	1.08603	0.278586	0.416273	-6.13801
ENSG00000104228	TRIM35	-0.52029	-0.542727	-2.58276	0.0104117	0.0337257	-3.30773
ENSG00000104267	CA2	-0.468565	-0.189697	-1.98053	0.0488178	0.111681	-4.68244
ENSG00000104299	INTS9	-0.276381	0.309283	-1.54016	0.124876	0.228067	-5.51923
ENSG00000104312	RIPK2	0.523992	3.23627	2.82809	0.00508961	0.0191768	-3.02685
ENSG00000104320	NBN	1.73675	4.57523	8.6117	1.08723e-15	1.62162e-13	25.0545
ENSG00000104324	CPQ	-0.161976	2.5872	-1.07288	0.284434	0.422509	-6.36144
ENSG00000104325	DECR1	0.324626	3.01352	2.11768	0.03526	0.0871452	-4.72724
ENSG00000104331	IMPAD1	-0.27726	0.468914	-1.48473	0.138965	0.248	-5.64073
ENSG00000104343	UBE2W	0.398265	1.9855	2.8143	0.00530546	0.0197456	-3.00739
ENSG00000104365	IKBKB	0.21826	2.76456	1.85596	0.0647191	0.138559	-5.22994
ENSG00000104375	STK3	0.239338	1.90618	1.45994	0.14565	0.256627	-5.82091
ENSG00000104388	RAB2A	0.0403485	2.84927	0.322762	0.747164	0.82977	-6.88501
ENSG00000104408	EIF3E	-0.174706	2.45181	-1.07227	0.284704	0.422719	-6.35763
ENSG00000104412	EMC2	0.393839	1.93774	2.26668	0.024326	0.0651632	-4.34906
ENSG00000104419	NDRG1	-0.211693	4.39587	-1.36966	0.172108	0.290806	-6.02244
ENSG00000104432	IL7	0.450692	0.013517	1.6892	0.092516	0.181673	-5.17072
ENSG00000104447	TRPS1	0.16613	1.69858	1.13677	0.256799	0.392013	-6.2223
ENSG00000104450	SPAG1	-0.189773	0.0796003	-0.89949	0.369319	0.50985	-6.24567
ENSG00000104472	CHRAC1	0.164794	0.380438	0.955148	0.340491	0.480888	-6.21002
ENSG00000104490	NCALD	-0.882917	-0.142487	-3.13323	0.00195023	0.0089335	-1.89464
ENSG00000104497	SNX16	0.429817	0.141048	2.40773	0.0168289	0.0488538	-3.77673
ENSG00000104517	UBR5	0.0300598	2.07674	0.258549	0.796211	0.86492	-6.86677
ENSG00000104518	GSDMD	0.491676	2.87811	3.59224	0.000399755	0.00248748	-0.682471
ENSG00000104522	TSTA3	-0.303122	0.9302	-1.85941	0.0642278	0.137717	-5.09384
ENSG00000104529	EEF1D	-0.179077	4.89622	-1.67768	0.0947478	0.184898	-5.55685
ENSG00000104549	SQLE	-0.409671	0.286888	-2.28808	0.0230279	0.0624481	-4.11986
ENSG00000104611	SH2D4A	-0.372942	-0.0606349	-1.71277	0.0880828	0.174957	-5.18385
ENSG00000104613	INTS10	-0.107321	1.65824	-0.703944	0.482169	0.615386	-6.62575
ENSG00000104626	ERI1	0.276446	1.88021	1.41801	0.157521	0.272249	-5.87527
ENSG00000104660	LEPROTL1	0.223078	1.72109	1.36474	0.173647	0.292799	-5.93935
ENSG00000104671	DCTN6	-0.11362	0.699504	-0.700351	0.484406	0.616881	-6.50508
ENSG00000104687	GSR	-0.0650579	1.89242	-0.467288	0.64073	0.747581	-6.78436
ENSG00000104689	TNFRSF10A	0.100324	0.847505	0.587691	0.557308	0.682356	-6.58077
ENSG00000104695	PPP2CB	-0.141877	1.98835	-1.0345	0.301974	0.440651	-6.37196
ENSG00000104714	ERICH1	-0.087178	2.80405	-0.511581	0.609428	0.723249	-6.80718
ENSG00000104731	KLHDC4	-0.472585	0.670931	-2.31257	0.0216173	0.0594582	-4.1491
ENSG00000104738	MCM4	-0.260433	0.662839	-1.10162	0.271761	0.408386	-6.14901
ENSG00000104756	KCTD9	-0.101803	0.819203	-0.549015	0.58352	0.702651	-6.61624
ENSG00000104763	ASAH1	0.17925	5.15284	1.20246	0.230402	0.362661	-6.23086
ENSG00000104765	BNIP3L	0.191326	2.27153	1.31164	0.190932	0.314329	-6.0549
ENSG00000104774	MAN2B1	-0.465642	3.27119	-3.47853	0.000601334	0.00345767	-1.08128
ENSG00000104783	KCNN4	0.0301714	1.39556	0.163413	0.870335	0.915731	-6.81746
ENSG00000104804	TULP2	0.858944	1.38036	2.07984	0.0386314	0.0932149	-4.63897
ENSG00000104805	NUCB1	0.0463466	4.31487	0.312769	0.754735	0.835107	-6.90461
ENSG00000104812	GYS1	-0.0572287	1.34389	-0.38009	0.704224	0.795272	-6.76862
ENSG00000104814	MAP4K1	-0.340713	0.324105	-1.29579	0.196329	0.320801	-5.8609
ENSG00000104823	ECH1	-0.714947	2.05798	-4.14612	4.73474e-05	0.000437231	1.32639
ENSG00000104824	HNRNPL	-0.175919	3.29812	-1.66991	0.096278	0.187193	-5.56984
ENSG00000104825	NFKBIB	0.178909	1.69606	1.29412	0.196902	0.32123	-6.03343
ENSG00000104852	SNRNP70	-0.262738	2.59335	-1.78011	0.0763582	0.157425	-5.36777
ENSG00000104853	CLPTM1	-0.332917	2.03894	-3.14619	0.00186925	0.008643	-2.08803
ENSG00000104856	RELB	0.334631	3.17246	2.37157	0.0185252	0.0526601	-4.17613
ENSG00000104859	CLASRP	0.144244	2.53302	1.09869	0.273035	0.409843	-6.32337
ENSG00000104866	PPP1R37	-0.466104	0.129511	-2.34209	0.020018	0.0559027	-3.98972
ENSG00000104870	FCGRT	-0.49448	3.61989	-3.71787	0.000251602	0.00170108	-0.271768
ENSG00000104872	PIH1D1	-0.153164	0.851365	-0.78304	0.434397	0.573064	-6.47256
ENSG00000104880	ARHGEF18	-0.102064	0.663258	-0.686386	0.493151	0.624785	-6.50374
ENSG00000104885	DOT1L	-0.187297	2.85374	-1.17592	0.240827	0.374266	-6.2551
ENSG00000104886	PLEKHJ1	-0.102589	1.34183	-0.714975	0.475339	0.609276	-6.58714
ENSG00000104894	CD37	0.512786	4.90071	3.61178	0.000372286	0.00234471	-0.63665
ENSG00000104897	SF3A2	-0.1581	1.26682	-1.09003	0.276826	0.414388	-6.24494
ENSG00000104903	LYL1	0.0367008	1.11424	0.229592	0.81861	0.880988	-6.76479
ENSG00000104904	OAZ1	-0.200663	6.48404	-2.04647	0.0418304	0.0988426	-4.86141
ENSG00000104907	TRMT1	-0.572668	0.132527	-2.77523	0.00596327	0.0216694	-2.9366
ENSG00000104915	STX10	0.144081	2.05824	0.961434	0.337329	0.477781	-6.43191
ENSG00000104918	RETN	-0.400625	2.40245	-1.17122	0.242704	0.37619	-6.24048
ENSG00000104936	DMPK	-0.969599	-0.417999	-4.32293	2.28093e-05	0.000235608	2.26007
ENSG00000104946	TBC1D17	0.649206	1.58391	4.21394	3.58782e-05	0.0003466	1.67392
ENSG00000104951	IL4I1	1.64792	2.35339	6.46139	5.98095e-10	2.46345e-08	12.2117
ENSG00000104957	CCDC130	-0.362856	1.08157	-2.82804	0.00509031	0.0191768	-2.91251
ENSG00000104960	PTOV1	-0.774701	1.92485	-5.83358	1.79905e-08	5.16322e-07	8.87529
ENSG00000104964	TLE5	-0.655958	3.22374	-3.42075	0.000737077	0.00404222	-1.26956
ENSG00000104969	SGTA	-0.213908	1.60661	-1.81384	0.070986	0.148963	-5.24516
ENSG00000104972	LILRB1	0.795158	3.47462	3.80545	0.000180868	0.00128926	0.0483301
ENSG00000104973	MED25	-0.147061	2.26852	-1.20113	0.230919	0.363358	-6.20059
ENSG00000104974	LILRA1	0.757577	1.342	3.42521	0.000725659	0.00399295	-1.0917
ENSG00000104976	SNAPC2	-0.477619	-0.0843808	-2.38074	0.0180815	0.0516373	-3.85876
ENSG00000104979	C19orf53	-0.251655	1.58139	-1.58442	0.114451	0.214029	-5.63167
ENSG00000104980	TIMM44	-0.721111	0.450381	-3.96698	9.68718e-05	0.000778806	0.795886
ENSG00000104983	CCDC61	-1.06584	-0.605548	-4.52792	9.50009e-06	0.000112268	3.11149
ENSG00000104998	IL27RA	0.256538	-0.144012	1.71733	0.087246	0.173682	-5.09589
ENSG00000105053	VRK3	0.119964	2.26501	1.18271	0.238127	0.371289	-6.21591
ENSG00000105058	FAM32A	0.119969	1.85128	0.932583	0.351999	0.492229	-6.44682
ENSG00000105063	PPP6R1	-0.0471961	2.59838	-0.425813	0.670637	0.768539	-6.84065
ENSG00000105085	MED26	-0.319506	-0.104731	-1.83614	0.067609	0.143406	-4.94715
ENSG00000105122	RASAL3	0.349396	1.6407	1.84689	0.0660295	0.140874	-5.16376
ENSG00000105127	AKAP8	-0.135878	0.516088	-0.937216	0.349616	0.489701	-6.28642
ENSG00000105135	ILVBL	-0.655317	-0.131464	-3.18457	0.00164726	0.007781	-1.73307
ENSG00000105171	POP4	0.140252	1.01473	0.763152	0.446143	0.583245	-6.48983
ENSG00000105176	URI1	-0.0746266	0.686438	-0.407643	0.683909	0.778732	-6.66708
ENSG00000105185	PDCD5	-0.3809	0.787618	-1.7167	0.0873608	0.173762	-5.32985
ENSG00000105186	ANKRD27	-0.101482	0.499489	-0.716222	0.47457	0.608607	-6.45414
ENSG00000105193	RPS16	-0.389367	5.14579	-2.49239	0.0133834	0.0408896	-3.89549
ENSG00000105197	TIMM50	-0.868245	1.16518	-5.46351	1.19428e-07	2.71512e-06	7.08614
ENSG00000105202	FBL	-0.530445	1.32831	-2.88607	0.00426654	0.0167464	-2.79068
ENSG00000105220	GPI	-0.721063	2.81028	-4.81286	2.67286e-06	3.89802e-05	4.03982
ENSG00000105221	AKT2	0.117463	2.86717	1.06083	0.289862	0.427797	-6.37794
ENSG00000105223	PLD3	-0.711563	2.84184	-4.14514	4.7536e-05	0.000438561	1.30112
ENSG00000105229	PIAS4	0.00687977	1.21657	0.0406273	0.967628	0.98073	-6.81348
ENSG00000105245	NUMBL	-0.803929	-0.267837	-3.89644	0.000127552	0.000968848	0.644386
ENSG00000105246	EBI3	1.39108	0.15832	4.07118	6.4069e-05	0.000559605	1.35641
ENSG00000105248	YJU2	0.309871	-0.185026	1.71194	0.0882367	0.175157	-5.08613
ENSG00000105254	TBCB	-0.197362	2.08206	-1.53979	0.124966	0.228147	-5.73595
ENSG00000105258	POLR2I	-0.685295	0.574725	-2.42992	0.0158573	0.0465134	-3.87609
ENSG00000105281	SLC1A5	-0.619146	0.726966	-3.68401	0.00028539	0.00188929	-0.235795
ENSG00000105287	PRKD2	0.668237	3.15976	4.19124	3.93833e-05	0.000373137	1.48867
ENSG00000105289	TJP3	-0.788315	0.0752761	-3.05013	0.00255162	0.0111488	-2.17662
ENSG00000105290	APLP1	-0.349023	-0.0642873	-1.11938	0.26413	0.400449	-6.01684
ENSG00000105321	CCDC9	0.318213	2.21835	2.14894	0.0326683	0.0820792	-4.62424
ENSG00000105323	HNRNPUL1	-0.41405	2.85735	-3.45377	0.000656361	0.00369424	-1.15595
ENSG00000105325	FZR1	-0.0558196	1.67786	-0.394546	0.693538	0.78609	-6.79602
ENSG00000105327	BBC3	0.032667	1.17599	0.154054	0.8777	0.920431	-6.7999
ENSG00000105329	TGFB1	0.287749	3.94881	2.32786	0.020775	0.0576301	-4.28675
ENSG00000105339	DENND3	0.339373	5.26739	1.90002	0.0586635	0.128467	-5.16509
ENSG00000105341	DMAC2	-0.197839	0.448277	-1.40695	0.160771	0.276828	-5.734
ENSG00000105352	CEACAM4	0.353491	1.46193	1.48667	0.138451	0.247262	-5.72507
ENSG00000105355	PLIN3	-0.00862252	3.05407	-0.0845799	0.932668	0.957748	-6.93933
ENSG00000105357	MYH14	-0.978656	0.702374	-3.44322	0.000681214	0.00380151	-1.06738
ENSG00000105364	MRPL4	-0.736016	-0.068384	-3.93105	0.000111498	0.00086903	0.739643
ENSG00000105372	RPS19	-0.291159	4.96354	-1.5762	0.116333	0.216645	-5.71795
ENSG00000105373	NOP53	-0.572777	2.48647	-3.86549	0.000143747	0.00106555	0.267194
ENSG00000105374	NKG7	1.54058	2.77076	5.48954	1.04842e-07	2.40575e-06	7.19181
ENSG00000105379	ETFB	-0.445716	1.25291	-2.79863	0.00556094	0.0204796	-3.01947
ENSG00000105383	CD33	-0.712947	0.0131318	-3.9107	0.00012069	0.000928179	0.655569
ENSG00000105388	CEACAM5	0.195534	1.2701	0.532726	0.59473	0.712143	-6.66879
ENSG00000105393	BABAM1	-0.118028	1.25686	-0.716451	0.474429	0.60855	-6.58104
ENSG00000105397	TYK2	-0.170499	3.62819	-1.24512	0.214337	0.342634	-6.18338
ENSG00000105401	CDC37	-0.333211	3.32363	-2.55127	0.0113724	0.0361023	-3.75608
ENSG00000105402	NAPA	0.997379	4.5524	7.3539	3.239e-12	2.16903e-10	17.2295
ENSG00000105404	RABAC1	-0.247898	2.52085	-1.60757	0.109281	0.206441	-5.65112
ENSG00000105438	KDELR1	-0.588209	1.82528	-3.93487	0.000109848	0.000861947	0.551324
ENSG00000105443	CYTH2	-0.594659	1.62894	-4.34467	2.08167e-05	0.000218	2.13473
ENSG00000105483	CARD8	0.375972	3.49592	2.79646	0.00559717	0.0205899	-3.12038
ENSG00000105486	LIG1	-0.30061	0.0707067	-1.27835	0.202395	0.327585	-5.83208
ENSG00000105499	PLA2G4C	0.265608	1.31391	1.11351	0.266636	0.403005	-6.19312
ENSG00000105501	SIGLEC5	1.03233	2.34402	3.91539	0.000118511	0.000916434	0.502265
ENSG00000105514	RAB3D	0.0889156	1.94569	0.470773	0.638242	0.745277	-6.77286
ENSG00000105518	TMEM205	-0.106192	0.645089	-0.603925	0.54648	0.673117	-6.5601
ENSG00000105519	CAPS	-1.67968	1.10207	-4.80595	2.75825e-06	3.98711e-05	4.06031
ENSG00000105520	PLPPR2	0.135951	1.87417	0.773249	0.440157	0.578109	-6.57836
ENSG00000105523	FAM83E	-0.799518	-0.445302	-2.98386	0.00314886	0.0131904	-2.26266
ENSG00000105556	MIER2	-0.556169	0.102181	-2.86698	0.00452306	0.0174471	-2.67356
ENSG00000105559	PLEKHA4	-0.0680419	0.147377	-0.293946	0.76906	0.845597	-6.6093
ENSG00000105568	PPP2R1A	-0.44877	2.41969	-3.27923	0.00119985	0.00601392	-1.70218
ENSG00000105576	TNPO2	-0.27546	1.20061	-1.95745	0.0514866	0.116187	-4.93905
ENSG00000105583	WDR83OS	0.134541	1.63105	0.57371	0.566717	0.689246	-6.69135
ENSG00000105607	GCDH	-0.538407	-0.142413	-2.57243	0.0107185	0.0345101	-3.40571
ENSG00000105609	LILRB5	-0.120722	-0.104979	-0.862917	0.389069	0.530103	-6.2116
ENSG00000105612	DNASE2	0.164051	1.30436	0.908263	0.364676	0.506115	-6.40997
ENSG00000105618	PRPF31	-0.576705	0.252234	-3.84288	0.000156787	0.00114923	0.378137
ENSG00000105619	TFPT	-0.398575	-0.0151364	-2.11176	0.03577	0.0880079	-4.44574
ENSG00000105639	JAK3	0.834758	3.73579	4.81248	2.67743e-06	3.8989e-05	4.03698
ENSG00000105640	RPL18A	-0.678456	4.52133	-3.65606	0.000316458	0.0020458	-0.483305
ENSG00000105643	ARRDC2	-0.120837	2.31875	-0.764398	0.445402	0.582633	-6.62883
ENSG00000105647	PIK3R2	-0.554953	0.0025412	-2.28311	0.023324	0.0631294	-4.09828
ENSG00000105655	ISYNA1	-0.242803	0.110515	-1.16083	0.246898	0.380771	-5.98048
ENSG00000105656	ELL	-0.0853037	2.7616	-0.559677	0.576237	0.696351	-6.78082
ENSG00000105669	COPE	0.0556122	3.33451	0.475693	0.634738	0.742564	-6.83552
ENSG00000105671	DDX49	0.182341	0.946352	1.05829	0.291016	0.429177	-6.21338
ENSG00000105676	ARMC6	-0.075965	5.88338e-05	-0.419413	0.6753	0.771727	-6.50665
ENSG00000105677	TMEM147	-0.612413	0.53528	-3.2839	0.00118099	0.00595274	-1.52826
ENSG00000105697	HAMP	1.92691	1.24177	4.64685	5.63555e-06	7.19538e-05	3.57887
ENSG00000105698	USF2	0.0391397	3.702	0.295626	0.767779	0.844754	-6.90829
ENSG00000105699	LSR	-0.238329	0.583491	-1.01845	0.30952	0.448669	-6.22012
ENSG00000105700	KXD1	-0.396546	2.11172	-3.19228	0.00160569	0.00761388	-1.95588
ENSG00000105701	FKBP8	-0.291723	3.52365	-2.44247	0.0153303	0.045387	-4.02089
ENSG00000105705	SUGP1	0.0794477	0.8184	0.502374	0.615878	0.72834	-6.62342
ENSG00000105707	HPN	0.448542	0.522894	1.55866	0.120432	0.222427	-5.46687
ENSG00000105711	SCN1B	0.538265	1.60844	2.0789	0.0387186	0.0933267	-4.70016
ENSG00000105722	ERF	-0.73647	1.90043	-4.04863	7.01156e-05	0.000598109	0.963841
ENSG00000105723	GSK3A	-0.255412	1.79238	-2.14728	0.0328017	0.0823095	-4.61734
ENSG00000105726	ATP13A1	0.263548	1.67071	1.62975	0.104504	0.199871	-5.54054
ENSG00000105738	SIPA1L3	-0.180521	1.13635	-0.830186	0.407282	0.547417	-6.48115
ENSG00000105755	ETHE1	-0.701538	0.427412	-3.60111	0.00038705	0.00242515	-0.501512
ENSG00000105771	SMG9	-0.169497	2.04583	-1.01533	0.310998	0.450517	-6.39274
ENSG00000105778	AVL9	0.168666	1.95564	1.38196	0.168304	0.286294	-5.93801
ENSG00000105792	CFAP69	-0.348236	0.287104	-1.65325	0.0996238	0.192256	-5.34445
ENSG00000105808	RASA4	-0.338193	1.10941	-1.5837	0.114615	0.214165	-5.59096
ENSG00000105810	CDK6	-0.236582	-0.235478	-1.33086	0.184533	0.306176	-5.6836
ENSG00000105819	PMPCB	0.184272	0.664457	1.48826	0.138032	0.246783	-5.61902
ENSG00000105821	DNAJC2	0.234208	0.403203	1.60404	0.110058	0.207654	-5.40395
ENSG00000105835	NAMPT	0.579509	8.84079	3.22852	0.00142314	0.00687744	-1.82463
ENSG00000105851	PIK3CG	0.180065	1.56097	1.12059	0.263613	0.399847	-6.2226
ENSG00000105854	PON2	-0.729243	-0.380338	-3.42718	0.000720661	0.00397656	-0.942475
ENSG00000105855	ITGB8	-0.787512	1.51294	-4.13942	4.86527e-05	0.000447187	1.3317
ENSG00000105856	HBP1	0.598837	3.34324	4.76203	3.36569e-06	4.69958e-05	3.82168
ENSG00000105866	SP4	0.346237	-0.368537	1.42196	0.156372	0.27096	-5.49964
ENSG00000105875	WDR91	-0.052423	1.04956	-0.253799	0.799874	0.867368	-6.76363
ENSG00000105877	DNAH11	-0.437895	1.48936	-1.61665	0.107305	0.203635	-5.58475
ENSG00000105879	CBLL1	0.486654	0.646123	2.86235	0.00458728	0.0176258	-2.70632
ENSG00000105887	MTPN	0.0449481	3.34998	0.366658	0.714206	0.803135	-6.88143
ENSG00000105928	GSDME	0.143368	-0.27466	0.594649	0.552654	0.678176	-6.34381
ENSG00000105939	ZC3HAV1	1.81325	2.89012	8.24644	1.18924e-14	1.42767e-12	22.7365
ENSG00000105953	OGDH	-0.235695	2.4846	-2.26273	0.0245722	0.0656951	-4.40941
ENSG00000105963	ADAP1	-0.170858	2.84486	-0.979701	0.328248	0.468369	-6.46449
ENSG00000105967	TFEC	1.79875	2.5889	6.5787	3.0867e-10	1.35649e-08	12.8481
ENSG00000105968	H2AZ2	-0.387819	1.98755	-2.82819	0.00508805	0.0191768	-2.99781
ENSG00000105976	MET	0.00480207	0.290595	0.0214252	0.982925	0.988548	-6.67184
ENSG00000105983	LMBR1	-0.182904	1.77367	-1.29431	0.196837	0.321178	-6.05686
ENSG00000105993	DNAJB6	0.381353	3.84178	3.93252	0.000110862	0.000866821	0.49832
ENSG00000106003	LFNG	-0.538985	1.9797	-3.71369	0.000255561	0.00172343	-0.247782
ENSG00000106009	BRAT1	-0.370901	0.324471	-2.69593	0.00753041	0.0262963	-3.15423
ENSG00000106012	IQCE	-0.282814	1.21286	-1.88162	0.0611318	0.13258	-5.08616
ENSG00000106028	SSBP1	-0.0312175	1.51385	-0.202942	0.839357	0.894999	-6.83332
ENSG00000106052	TAX1BP1	0.177699	2.68679	1.43953	0.151339	0.264568	-5.90296
ENSG00000106066	CPVL	-0.0381912	1.62731	-0.219472	0.826474	0.886447	-6.84117
ENSG00000106069	CHN2	-0.3747	-0.0417213	-1.57773	0.115982	0.216155	-5.39939
ENSG00000106070	GRB10	0.225781	1.74586	0.965381	0.335353	0.475543	-6.39728
ENSG00000106077	ABHD11	-0.808646	0.13184	-3.97063	9.5493e-05	0.000769888	0.844301
ENSG00000106089	STX1A	-0.958498	0.373694	-4.27266	2.81401e-05	0.000283823	1.9556
ENSG00000106100	NOD1	0.423832	-0.286109	1.85021	0.0655469	0.139936	-4.80355
ENSG00000106105	GARS1	0.0271527	2.35626	0.183476	0.854583	0.90544	-6.90165
ENSG00000106144	CASP2	0.00754512	0.173665	0.0486029	0.961277	0.976857	-6.61854
ENSG00000106153	CHCHD2	-0.0163119	3.37179	-0.1091	0.913217	0.945588	-6.94314
ENSG00000106211	HSPB1	-0.998489	3.73177	-3.47328	0.000612628	0.00350322	-1.10031
ENSG00000106244	PDAP1	0.0380927	2.96114	0.247881	0.804445	0.870104	-6.90998
ENSG00000106245	BUD31	0.458678	2.61768	3.08688	0.00226721	0.0100307	-2.27466
ENSG00000106258	CYP3A5	-0.594394	-0.149626	-2.66445	0.00824928	0.0281867	-3.18003
ENSG00000106261	ZKSCAN1	-0.0510497	1.65966	-0.411566	0.681035	0.776208	-6.78392
ENSG00000106263	EIF3B	-0.562395	1.47298	-4.51835	9.90374e-06	0.000116307	2.84914
ENSG00000106266	SNX8	0.0124711	2.47365	0.0673206	0.946384	0.967262	-6.92045
ENSG00000106268	NUDT1	-0.38837	0.663588	-1.19284	0.234143	0.366789	-6.05097
ENSG00000106290	TAF6	-0.406676	0.500181	-2.16503	0.0313992	0.0796081	-4.43228
ENSG00000106330	MOSPD3	-0.387222	-0.325778	-2.15843	0.0319143	0.0806584	-4.29355
ENSG00000106344	RBM28	-0.472491	0.427449	-2.75379	0.00635468	0.0227557	-3.02451
ENSG00000106346	USP42	0.496597	0.258614	2.98235	0.00316377	0.0132416	-2.29935
ENSG00000106348	IMPDH1	-0.164934	3.20759	-1.19299	0.234086	0.366758	-6.24217
ENSG00000106367	AP1S1	-0.115357	0.0481486	-0.624349	0.533008	0.660846	-6.43863
ENSG00000106392	C1GALT1	1.10037	2.04753	6.57301	3.18793e-10	1.38858e-08	12.8211
ENSG00000106397	PLOD3	-0.73853	1.77004	-4.81155	2.68887e-06	3.90402e-05	4.0673
ENSG00000106399	RPA3	-0.0271074	-0.156562	-0.116146	0.907637	0.941503	-6.56865
ENSG00000106400	ZNHIT1	-0.00792991	1.94495	-0.0620542	0.950573	0.969671	-6.89018
ENSG00000106415	GLCCI1	0.0563268	-0.0295039	0.274984	0.783572	0.855912	-6.56052
ENSG00000106459	NRF1	0.0449858	0.0750477	0.282763	0.777609	0.851857	-6.56944
ENSG00000106460	TMEM106B	-0.0830605	0.563997	-0.498128	0.618863	0.730553	-6.5908
ENSG00000106462	EZH2	1.02874	0.360404	4.58523	7.39621e-06	9.08968e-05	3.33151
ENSG00000106541	AGR2	-0.185498	1.94372	-0.514575	0.607337	0.72162	-6.7676
ENSG00000106546	AHR	0.196928	2.18859	1.21001	0.227497	0.358985	-6.17223
ENSG00000106554	CHCHD3	-0.0811656	0.444681	-0.466327	0.641416	0.748116	-6.5896
ENSG00000106560	GIMAP2	1.38114	1.27611	5.31239	2.52184e-07	5.18268e-06	6.46506
ENSG00000106565	TMEM176B	1.87233	1.93791	6.36096	1.04718e-09	4.01105e-08	11.7056
ENSG00000106588	PSMA2	0.594145	1.60304	3.06804	0.00240915	0.0105921	-2.24208
ENSG00000106591	MRPL32	0.185759	-0.117772	0.84336	0.399891	0.540509	-6.21069
ENSG00000106603	COA1	-0.122546	1.34696	-1.03912	0.299822	0.438699	-6.30679
ENSG00000106605	BLVRA	0.0929256	1.87548	0.505095	0.613968	0.726606	-6.75717
ENSG00000106608	URGCP	-0.420843	-0.192432	-2.29416	0.0226704	0.061785	-4.03473
ENSG00000106609	TMEM248	0.0769449	2.12917	0.653484	0.514088	0.644272	-6.68897
ENSG00000106615	RHEB	0.123961	2.37873	0.98951	0.323438	0.463723	-6.43047
ENSG00000106617	PRKAG2	0.446186	2.32684	3.75171	0.000221635	0.00152572	-0.107526
ENSG00000106628	POLD2	-0.749553	0.154634	-3.74919	0.000223742	0.00153915	0.0509975
ENSG00000106635	BCL7B	-0.00938691	1.65522	-0.0774994	0.938293	0.96164	-6.86432
ENSG00000106636	YKT6	0.0566535	1.64616	0.472474	0.63703	0.744235	-6.74889
ENSG00000106638	TBL2	-0.230295	1.3222	-1.59917	0.111135	0.2093	-5.58121
ENSG00000106665	CLIP2	-0.417811	0.470692	-2.69033	0.00765389	0.0266425	-3.19358
ENSG00000106682	EIF4H	-0.142216	3.10432	-1.27271	0.204389	0.329836	-6.1428
ENSG00000106683	LIMK1	-0.216706	1.43366	-1.71655	0.0873877	0.173762	-5.40061
ENSG00000106714	CNTNAP3	-0.300655	0.73141	-1.1035	0.270948	0.407581	-6.15895
ENSG00000106723	SPIN1	-0.093207	0.440463	-0.51925	0.604078	0.719051	-6.55846
ENSG00000106733	NMRK1	0.384882	0.879925	2.23532	0.0263431	0.0692446	-4.28571
ENSG00000106780	MEGF9	0.123514	1.90445	0.673427	0.501342	0.632476	-6.6567
ENSG00000106785	TRIM14	0.499145	1.64473	2.50312	0.0129952	0.0399016	-3.76832
ENSG00000106799	TGFBR1	0.195515	2.10964	1.09475	0.274756	0.41205	-6.30129
ENSG00000106803	SEC61B	-0.167032	2.50843	-1.00168	0.317536	0.457593	-6.43097
ENSG00000106829	TLE4	0.655535	3.61569	5.73602	2.98838e-08	8.08176e-07	8.36039
ENSG00000106853	PTGR1	-0.488887	0.495891	-2.81566	0.00528391	0.0196951	-2.8823
ENSG00000106868	SUSD1	0.0605782	1.12849	0.423352	0.672428	0.769606	-6.71268
ENSG00000106948	AKNA	0.296178	3.47957	2.08765	0.0379145	0.0920193	-4.79937
ENSG00000106952	TNFSF8	-0.460087	0.788214	-1.78438	0.075661	0.156538	-5.19906
ENSG00000106976	DNM1	-0.82074	-0.36128	-2.39634	0.017348	0.0498901	-3.80205
ENSG00000106991	ENG	-0.295415	2.34515	-1.60904	0.108959	0.206212	-5.6421
ENSG00000106992	AK1	-0.656629	-0.758954	-2.55754	0.0111749	0.0356698	-3.32452
ENSG00000107020	PLGRKT	0.550734	0.709133	2.78227	0.00583957	0.0213222	-2.9269
ENSG00000107036	RIC1	0.62134	0.501895	3.92858	0.000112576	0.000875357	0.74236
ENSG00000107077	KDM4C	0.143787	1.29901	1.04569	0.296788	0.435667	-6.27911
ENSG00000107099	DOCK8	0.462783	4.00738	3.6144	0.000368732	0.00232799	-0.627737
ENSG00000107104	KANK1	-0.271327	-0.223336	-1.29764	0.195693	0.320053	-5.73244
ENSG00000107140	TESK1	-0.0666554	0.842662	-0.421637	0.673678	0.770588	-6.67603
ENSG00000107164	FUBP3	-0.248733	0.694114	-1.47258	0.142212	0.251831	-5.68394
ENSG00000107175	CREB3	-0.185381	0.376326	-1.26308	0.20782	0.334223	-5.89768
ENSG00000107201	DDX58	3.07377	2.50704	9.09044	4.38181e-17	9.17757e-15	28.2106
ENSG00000107223	EDF1	-0.460555	2.82591	-2.44348	0.0152884	0.0452901	-4.00924
ENSG00000107242	PIP5K1B	-0.228292	-0.115763	-1.32789	0.185511	0.307347	-5.72863
ENSG00000107249	GLIS3	-1.57132	-0.460163	-7.40711	2.34265e-12	1.63554e-10	17.6444
ENSG00000107262	BAG1	0.323684	2.78231	1.96766	0.0502909	0.114281	-5.01831
ENSG00000107263	RAPGEF1	-0.217615	3.77475	-1.58334	0.114698	0.214249	-5.71216
ENSG00000107281	NPDC1	-0.349579	-0.525651	-1.39229	0.16516	0.282441	-5.56143
ENSG00000107290	SETX	0.725988	2.4385	4.68156	4.82947e-06	6.3304e-05	3.51346
ENSG00000107331	ABCA2	0.0799749	1.88002	0.450232	0.652961	0.755672	-6.77823
ENSG00000107341	UBE2R2	-0.0222894	2.10413	-0.17676	0.85985	0.908806	-6.88807
ENSG00000107371	EXOSC3	-0.0551562	0.757409	-0.318736	0.750212	0.831654	-6.70288
ENSG00000107372	ZFAND5	-0.0257643	3.69616	-0.18374	0.854377	0.905425	-6.93519
ENSG00000107404	DVL1	-0.648029	0.577716	-3.67005	0.000300527	0.00197226	-0.273937
ENSG00000107438	PDLIM1	-1.48135	0.946809	-5.72268	3.20169e-08	8.513e-07	8.35738
ENSG00000107521	HPS1	0.338959	2.77413	2.93279	0.00369375	0.014947	-2.72834
ENSG00000107551	RASSF4	0.459686	1.73919	2.45517	0.0148125	0.0440927	-3.89385
ENSG00000107566	ERLIN1	0.364496	1.01847	1.69211	0.0919586	0.180759	-5.35339
ENSG00000107581	EIF3A	-0.107498	2.25814	-0.846888	0.397925	0.539071	-6.55767
ENSG00000107614	TRDMT1	-0.115276	0.328704	-0.562599	0.574248	0.695057	-6.5269
ENSG00000107625	DDX50	0.114329	0.331184	0.777152	0.437856	0.576237	-6.36191
ENSG00000107643	MAPK8	-0.0179636	0.893131	-0.115755	0.907947	0.941646	-6.76336
ENSG00000107651	SEC23IP	0.0478092	1.19222	0.304144	0.761289	0.839961	-6.7645
ENSG00000107669	ATE1	-0.125262	-0.0155066	-0.537218	0.591629	0.709292	-6.48362
ENSG00000107736	CDH23	0.265583	0.999685	1.59427	0.112229	0.210648	-5.51345
ENSG00000107738	VSIR	0.377726	4.36696	2.25813	0.0248617	0.0663608	-4.44305
ENSG00000107742	SPOCK2	0.532512	0.239385	1.94109	0.0534513	0.119585	-4.75434
ENSG00000107745	MICU1	0.570354	1.97387	4.42902	1.45519e-05	0.000161681	2.48765
ENSG00000107758	PPP3CB	0.274228	0.823584	1.83045	0.0684573	0.144545	-5.08642
ENSG00000107771	CCSER2	0.24673	1.1525	1.7402	0.0831413	0.167679	-5.30403
ENSG00000107796	ACTA2	0.0420309	0.240115	0.170979	0.864388	0.91149	-6.61183
ENSG00000107798	LIPA	0.985847	3.29714	3.57845	0.000420275	0.00258251	-0.731065
ENSG00000107819	SFXN3	-0.36501	1.45046	-2.48128	0.0137968	0.0419314	-3.83852
ENSG00000107829	FBXW4	-0.0309796	0.843309	-0.186457	0.852248	0.904239	-6.74375
ENSG00000107854	TNKS2	0.913376	1.29097	5.60742	5.78043e-08	1.43693e-06	7.8482
ENSG00000107862	GBF1	0.0290141	0.706154	0.225056	0.822133	0.883427	-6.70857
ENSG00000107863	ARHGAP21	-0.0188133	1.35788	-0.110592	0.912035	0.944762	-6.8321
ENSG00000107874	CUEDC2	-0.00869769	0.487744	-0.0549184	0.95625	0.973672	-6.69385
ENSG00000107897	ACBD5	0.348142	0.188644	2.23487	0.0263732	0.0693052	-4.16316
ENSG00000107902	LHPP	-0.817403	-0.153783	-4.11511	5.36872e-05	0.000482205	1.42395
ENSG00000107929	LARP4B	0.358412	2.79451	3.05559	0.0025074	0.0109897	-2.37546
ENSG00000107937	GTPBP4	-0.0314087	0.369789	-0.172607	0.86311	0.910855	-6.67147
ENSG00000107938	EDRF1	-0.0134608	-0.00140573	-0.0820446	0.934682	0.958838	-6.58661
ENSG00000107949	BCCIP	-0.267735	0.00286141	-1.54574	0.123523	0.226529	-5.45131
ENSG00000107959	PITRM1	-0.273485	0.815332	-1.73972	0.0832257	0.167781	-5.28547
ENSG00000107968	MAP3K8	0.237756	3.60149	1.57516	0.116574	0.216928	-5.72196
ENSG00000108010	GLRX3	-0.298989	2.03844	-1.7747	0.0772511	0.158793	-5.35488
ENSG00000108021	TASOR2	0.386412	1.2301	2.29935	0.0223689	0.0610818	-4.20341
ENSG00000108039	XPNPEP1	-0.415985	1.69003	-2.76616	0.00612603	0.0221139	-3.14306
ENSG00000108061	SHOC2	0.456802	3.05015	3.35215	0.000935339	0.00490236	-1.47704
ENSG00000108064	TFAM	0.0569373	0.204802	0.316872	0.751624	0.832376	-6.58746
ENSG00000108094	CUL2	0.609961	0.333327	3.21331	0.00149729	0.00717943	-1.63932
ENSG00000108100	CCNY	-0.0397385	1.66422	-0.259137	0.795758	0.864714	-6.83494
ENSG00000108106	UBE2S	0.497442	1.90239	2.34946	0.0196348	0.0550281	-4.1598
ENSG00000108107	RPL28	0.0321134	5.58871	0.193799	0.846502	0.900569	-6.92423
ENSG00000108175	ZMIZ1	0.0750898	3.27341	0.453264	0.65078	0.753916	-6.84413
ENSG00000108179	PPIF	0.245414	5.62045	1.33458	0.183315	0.304936	-6.06008
ENSG00000108187	PBLD	0.187835	0.227659	1.07144	0.28508	0.423022	-6.07618
ENSG00000108219	TSPAN14	0.282461	3.86943	2.09165	0.0375509	0.0913848	-4.79492
ENSG00000108244	KRT23	0.0567377	2.30412	0.275358	0.783285	0.855884	-6.87044
ENSG00000108256	NUFIP2	0.239959	2.87401	1.48222	0.13963	0.248899	-5.84575
ENSG00000108262	GIT1	-0.195793	0.788983	-1.29502	0.196592	0.320991	-5.94056
ENSG00000108298	RPL19	-0.330636	4.65945	-1.86959	0.0627933	0.135298	-5.22395
ENSG00000108312	UBTF	-0.300519	1.63453	-2.47585	0.0140027	0.0423871	-3.87125
ENSG00000108342	CSF3	0.438679	0.030092	1.29745	0.195757	0.320105	-5.74789
ENSG00000108344	PSMD3	-0.0388741	1.50598	-0.278918	0.780555	0.85394	-6.81345
ENSG00000108349	CASC3	-0.154313	3.01856	-1.32317	0.187074	0.309246	-6.07673
ENSG00000108352	RAPGEFL1	-0.560114	0.48335	-3.23784	0.00137942	0.00671563	-1.64943
ENSG00000108387	SEPTIN4	0.115157	1.00119	0.529477	0.596978	0.713703	-6.64586
ENSG00000108389	MTMR4	0.00131548	1.04843	0.00776918	0.993808	0.995932	-6.79214
ENSG00000108395	TRIM37	0.0409466	-0.12857	0.191913	0.847977	0.901631	-6.55005
ENSG00000108405	P2RX1	-0.0689312	1.64601	-0.33281	0.739577	0.823947	-6.80997
ENSG00000108406	DHX40	0.0108285	0.710451	0.0685734	0.945388	0.966597	-6.73831
ENSG00000108423	TUBD1	-0.152232	-0.349669	-0.738266	0.461095	0.59598	-6.26608
ENSG00000108424	KPNB1	0.663892	4.14428	5.21334	4.0823e-07	7.80315e-06	5.83588
ENSG00000108433	GOSR2	-0.105904	1.098	-0.857974	0.391787	0.533216	-6.43756
ENSG00000108439	PNPO	-0.660232	-0.187796	-3.45263	0.000659003	0.00370699	-0.88615
ENSG00000108443	RPS6KB1	-0.0672315	1.08343	-0.417444	0.676738	0.772562	-6.71964
ENSG00000108465	CDK5RAP3	0.180218	2.51893	1.5575	0.120707	0.222851	-5.72123
ENSG00000108468	CBX1	-0.110507	0.32373	-0.79636	0.426632	0.566131	-6.35735
ENSG00000108469	RECQL5	-0.204847	0.843686	-1.1172	0.265058	0.401421	-6.16065
ENSG00000108474	PIGL	-0.840609	1.01805	-3.02624	0.0027537	0.0118788	-2.38057
ENSG00000108479	GALK1	0.114535	0.741619	0.738304	0.461072	0.59598	-6.46392
ENSG00000108509	CAMTA2	-0.329162	2.39814	-2.30611	0.0219818	0.0602114	-4.31293
[truncated: 7,845 more rows]

## Sheet: B (bacterial LRTI v CTRL)
ENSEMBL_ID	gene_symbol	logFC	AveExpr	t	P.Value	adj.P.Val	B
ENSG00000000419	DPM1	0.357796	0.816305	2.29153	0.0229665	0.065894	-4.01902
ENSG00000000938	FGR	0.323195	5.72941	2.46923	0.0143726	0.0461914	-3.81339
ENSG00000001036	FUCA2	-0.225455	0.744169	-1.5779	0.116156	0.22177	-5.3781
ENSG00000001084	GCLC	-0.349997	0.81496	-1.68124	0.0942649	0.189686	-5.23625
ENSG00000001167	NFYA	0.298061	1.04554	1.94219	0.0535086	0.124231	-4.76814
ENSG00000001626	CFTR	0.271007	1.64416	0.67501	0.500443	0.640703	-6.45539
ENSG00000001629	ANKIB1	0.410667	1.17384	2.33488	0.0205342	0.060412	-3.96965
ENSG00000001630	CYP51A1	0.0508278	0.425429	0.282119	0.778142	0.859518	-6.48137
ENSG00000001631	KRIT1	-0.601019	0.640019	-3.44473	0.000695423	0.00410921	-0.918457
ENSG00000002016	RAD52	0.220292	-0.468867	1.04081	0.29921	0.444191	-5.80719
ENSG00000002330	BAD	-0.465628	0.502953	-2.22217	0.0273842	0.0749639	-4.16984
ENSG00000002549	LAP3	1.07535	3.45781	4.05829	7.06976e-05	0.000636731	1.07845
ENSG00000002586	CD99	-0.380063	3.15213	-2.58085	0.0105662	0.0360656	-3.5317
ENSG00000002587	HS3ST1	-0.218925	-0.0343509	-0.808259	0.419895	0.566148	-6.12411
ENSG00000002822	MAD1L1	0.029046	1.77999	0.155494	0.876588	0.925276	-6.69918
ENSG00000002834	LASP1	-0.0478918	3.69897	-0.409159	0.682858	0.789351	-6.70688
ENSG00000002919	SNX11	0.27079	1.62937	1.62723	0.105251	0.205746	-5.38551
ENSG00000002933	TMEM176A	0.853618	1.52322	3.58818	0.000418077	0.00270344	-0.477129
ENSG00000003056	M6PR	-0.0183283	3.34311	-0.121765	0.903206	0.941731	-6.77665
ENSG00000003147	ICA1	-0.518099	-0.0666288	-2.15871	0.0320553	0.0842822	-4.19787
ENSG00000003393	ALS2	0.0306718	0.116861	0.176068	0.860417	0.914392	-6.44908
ENSG00000003400	CASP10	0.835976	1.37429	4.12675	5.38315e-05	0.000512493	1.44389
ENSG00000003402	CFLAR	0.729299	6.23712	5.68836	4.46981e-08	1.45614e-06	8.08606
ENSG00000003436	TFPI	-0.563673	0.18211	-2.91855	0.00391642	0.0164757	-2.42138
ENSG00000003509	NDUFAF7	0.0730933	-0.211344	0.39211	0.695392	0.798488	-6.30777
ENSG00000003756	RBM5	0.190221	3.63252	1.72298	0.0864261	0.178585	-5.32508
ENSG00000004059	ARF5	0.0349856	2.7107	0.278439	0.780961	0.861475	-6.72706
ENSG00000004142	POLDIP2	0.0954325	0.380212	0.621856	0.53474	0.671083	-6.32562
ENSG00000004399	PLXND1	-0.537376	2.54637	-2.98188	0.00321811	0.0141211	-2.45144
ENSG00000004455	AK2	0.151558	2.13953	1.04111	0.299074	0.444122	-6.19816
ENSG00000004468	CD38	1.45626	1.12425	4.95244	1.54751e-06	2.91275e-05	4.84798
ENSG00000004478	FKBP4	-0.611326	1.30049	-2.98299	0.00320692	0.014087	-2.38509
ENSG00000004487	KDM1A	-0.937997	-0.177716	-6.23319	2.62922e-09	1.22664e-07	10.9231
ENSG00000004534	RBM6	0.111257	1.77402	0.919696	0.358832	0.506356	-6.28499
ENSG00000004660	CAMKK1	-0.229406	-0.0669252	-1.27882	0.20243	0.333286	-5.64047
ENSG00000004700	RECQL	0.0156895	0.242224	0.0836785	0.933395	0.961124	-6.49416
ENSG00000004766	VPS50	-0.179479	-0.0584316	-0.811645	0.417953	0.564613	-6.12914
ENSG00000004779	NDUFAB1	-0.783681	0.436402	-3.53922	0.000498272	0.00313018	-0.597389
ENSG00000004838	ZMYND10	-1.49725	0.0111831	-4.8513	2.45125e-06	4.26584e-05	4.39861
ENSG00000004864	SLC25A13	0.817212	2.44383	3.27341	0.00125049	0.00655313	-1.55935
ENSG00000004866	ST7	-1.19264	-0.490537	-5.22755	4.28105e-07	9.84643e-06	6.0972
ENSG00000004897	CDC27	0.0781328	1.75077	0.621042	0.535274	0.671583	-6.51535
ENSG00000004975	DVL2	-0.177172	1.08272	-1.09319	0.275617	0.419546	-6.05992
ENSG00000005001	PRSS22	-0.497479	0.133287	-1.62393	0.105954	0.206868	-5.22042
ENSG00000005007	UPF1	-0.242	2.35449	-2.00887	0.0458859	0.110494	-4.77547
ENSG00000005020	SKAP2	0.209529	3.37814	1.36847	0.172689	0.296094	-5.85794
ENSG00000005022	SLC25A5	-0.659567	2.26552	-4.11927	5.54663e-05	0.000526022	1.31457
ENSG00000005059	MCUB	-0.225044	1.06783	-1.17448	0.241588	0.381524	-5.96618
ENSG00000005075	POLR2J	-0.0265068	1.40793	-0.166263	0.868117	0.919392	-6.66584
ENSG00000005156	LIG3	-0.141733	0.956804	-0.79201	0.429286	0.574561	-6.31784
ENSG00000005175	RPAP3	-0.0373795	0.173082	-0.169008	0.86596	0.918111	-6.47111
ENSG00000005187	ACSM3	0.336828	0.811196	1.38034	0.169011	0.291522	-5.63265
ENSG00000005194	CIAPIN1	0.0240532	-0.115768	0.118931	0.905449	0.94292	-6.41213
ENSG00000005206	SPPL2B	-0.485912	0.897373	-2.46536	0.0145239	0.0465255	-3.68335
ENSG00000005238	FAM214B	-0.220536	1.7774	-1.34099	0.181435	0.307198	-5.82748
ENSG00000005302	MSL3	0.666991	2.77106	4.30373	2.61919e-05	0.000286163	2.02753
ENSG00000005339	CREBBP	0.233167	4.35977	1.17548	0.241191	0.381289	-6.11114
ENSG00000005379	TSPOAP1	0.127141	1.29693	0.521575	0.602539	0.726708	-6.51409
ENSG00000005448	WDR54	-0.926655	-0.853332	-3.81167	0.000183369	0.0013864	0.490126
ENSG00000005483	KMT2E	0.499931	3.7034	3.79575	0.0001947	0.0014476	0.116369
ENSG00000005486	RHBDD2	-0.439766	2.84676	-2.98717	0.00316528	0.0139351	-2.44564
ENSG00000005700	IBTK	-0.397157	0.0667088	-2.77168	0.00609923	0.0233986	-2.78716
ENSG00000005801	ZNF195	-0.240892	0.0337523	-1.05764	0.291487	0.436146	-5.93011
ENSG00000005810	MYCBP2	0.305797	1.90478	2.25438	0.0252487	0.0705301	-4.22489
ENSG00000005812	FBXL3	0.350738	1.40506	2.27556	0.0239243	0.0677339	-4.12918
ENSG00000005844	ITGAL	-0.0279637	3.0779	-0.187077	0.851788	0.908451	-6.75997
ENSG00000005884	ITGA3	-1.00927	-0.133687	-4.25682	3.17732e-05	0.000334567	2.01716
ENSG00000005889	ZFX	0.43435	2.23709	2.6922	0.00769537	0.0280256	-3.20528
ENSG00000005893	LAMP2	0.272932	3.29837	1.72971	0.0852143	0.176749	-5.30669
ENSG00000006007	GDE1	-0.356234	0.565427	-2.19865	0.029041	0.078152	-4.2207
ENSG00000006015	REX1BD	-0.693374	0.671946	-3.72457	0.000253965	0.00179859	0.00285791
ENSG00000006118	TMEM132A	0.169144	0.874547	0.881153	0.379285	0.527133	-6.21923
ENSG00000006125	AP2B1	0.359641	2.99913	2.71723	0.00715626	0.0265234	-3.17398
ENSG00000006194	ZNF263	0.0493726	-0.0131856	0.301676	0.76321	0.849507	-6.41043
ENSG00000006282	SPATA20	-0.454998	0.0728123	-2.81971	0.00528689	0.020826	-2.67146
ENSG00000006327	TNFRSF12A	-1.15521	0.702565	-4.84405	2.53282e-06	4.35894e-05	4.3176
ENSG00000006451	RALA	0.249762	1.64629	1.42264	0.156386	0.276461	-5.69251
ENSG00000006453	BAIAP2L1	0.0221197	0.751654	0.129889	0.896783	0.938144	-6.58131
ENSG00000006459	KDM7A	0.277685	0.996481	1.78563	0.0756642	0.16136	-5.03972
ENSG00000006530	AGK	0.149542	1.20771	0.957657	0.339383	0.486018	-6.19283
ENSG00000006534	ALDH3B1	-0.774964	1.61379	-4.65378	5.90033e-06	8.73426e-05	3.45976
ENSG00000006576	PHTF2	0.304841	-0.276816	1.61957	0.106889	0.208359	-5.08982
ENSG00000006607	FARP2	-0.840498	0.55887	-3.74676	0.000233873	0.00167915	0.0825119
ENSG00000006634	DBF4	0.642899	-0.356745	2.57925	0.0106136	0.0361775	-3.14852
ENSG00000006652	IFRD1	0.28905	4.06478	1.66557	0.0973525	0.194231	-5.42504
ENSG00000006712	PAF1	0.328903	2.50441	2.59555	0.010139	0.0348613	-3.46571
ENSG00000006715	VPS41	-0.132573	1.83009	-0.837256	0.403441	0.550599	-6.37222
ENSG00000006744	ELAC2	-0.343248	0.585076	-1.82969	0.0687747	0.150082	-4.94498
ENSG00000006747	SCIN	0.0219623	-0.0384507	0.090379	0.928076	0.958745	-6.43276
ENSG00000006756	ARSD	-0.590486	0.346831	-4.28576	2.82086e-05	0.000301832	2.0952
ENSG00000006831	ADIPOR2	0.075066	1.43676	0.505497	0.613762	0.7352	-6.55343
ENSG00000006837	CDKL3	0.268659	-0.233589	1.1271	0.26104	0.403466	-5.75197
ENSG00000007047	MARK4	-0.0952018	1.53238	-0.64642	0.518743	0.65687	-6.48467
ENSG00000007062	PROM1	-1.62759	-0.434654	-5.97005	1.055e-08	4.10489e-07	9.60035
ENSG00000007080	CCDC124	-0.646444	1.1288	-3.77198	0.000212857	0.00155212	0.123516
ENSG00000007129	CEACAM21	0.116384	-0.440768	0.493368	0.62229	0.741805	-6.22172
ENSG00000007168	PAFAH1B1	0.179377	3.41212	1.68703	0.0931453	0.188241	-5.38153
ENSG00000007174	DNAH9	-1.67753	-0.596071	-6.60459	3.47205e-10	2.33843e-08	12.8544
ENSG00000007202	KIAA0100	-0.190172	2.03424	-1.54681	0.123479	0.231971	-5.557
ENSG00000007237	AC005747.1	0.785172	3.64507	4.34567	2.20091e-05	0.000250395	2.16989
ENSG00000007264	MATK	-0.105883	-0.0634747	-0.402991	0.687382	0.792572	-6.36485
ENSG00000007341	ST7L	0.346392	0.860869	2.36319	0.0190703	0.0572341	-3.86618
ENSG00000007392	LUC7L	-0.256914	0.952905	-1.81308	0.0713077	0.154343	-5.02415
ENSG00000007516	BAIAP3	-1.34037	0.092303	-5.20195	4.83487e-07	1.07924e-05	5.93311
ENSG00000007520	TSR3	-0.165218	0.449325	-0.929869	0.353552	0.501298	-6.1259
ENSG00000007541	PIGQ	-0.866014	0.375158	-4.30285	2.62881e-05	0.000286625	2.14828
ENSG00000007545	CRAMP1	-0.0880529	-0.0770397	-0.354118	0.72362	0.819903	-6.38201
ENSG00000007923	DNAJC11	-0.306417	0.114021	-1.44865	0.14899	0.267295	-5.46801
ENSG00000007944	MYLIP	0.729736	0.9945	3.63872	0.000348144	0.00232586	-0.255685
ENSG00000008018	PSMB1	0.0848503	2.13349	0.48762	0.626349	0.74538	-6.61728
ENSG00000008083	JARID2	0.220383	1.69398	1.52183	0.129621	0.240616	-5.55497
ENSG00000008086	CDKL5	-0.0317718	0.605096	-0.13787	0.89048	0.934113	-6.55113
ENSG00000008128	CDK11A	0.257931	2.04456	1.66376	0.0977151	0.194758	-5.35974
ENSG00000008130	NADK	0.902468	5.44464	7.00476	3.62513e-11	3.64141e-09	14.9681
ENSG00000008226	DLEC1	-1.52283	-0.25096	-7.32436	5.65046e-12	8.66087e-10	16.8033
ENSG00000008256	CYTH3	-0.454891	-0.0933153	-2.22458	0.0272191	0.0746819	-4.06206
ENSG00000008282	SYPL1	-0.220987	0.978331	-1.40809	0.160646	0.281533	-5.65762
ENSG00000008283	CYB561	-1.06224	0.021617	-4.68726	5.09374e-06	7.71894e-05	3.72112
ENSG00000008294	SPAG9	0.375514	4.23358	2.45063	0.0151137	0.0479469	-3.85691
ENSG00000008323	PLEKHG6	-0.0939522	1.55239	-0.422846	0.672858	0.782471	-6.60177
ENSG00000008382	MPND	-0.64314	0.0777993	-3.10296	0.00219109	0.0103201	-1.89211
ENSG00000008394	MGST1	-0.738671	1.44939	-3.17385	0.00174007	0.00860333	-1.84164
ENSG00000008438	PGLYRP1	0.0828494	1.183	0.297533	0.766366	0.851768	-6.58845
ENSG00000008513	ST3GAL1	0.193237	3.17657	1.4238	0.156052	0.276043	-5.77737
ENSG00000008516	MMP25	0.436754	4.6692	1.8022	0.0730092	0.157334	-5.19647
ENSG00000008517	IL32	0.896608	1.80768	3.29971	0.00114448	0.00607672	-1.42997
ENSG00000008710	PKD1	-1.01322	1.23893	-4.88703	2.08525e-06	3.70963e-05	4.46454
ENSG00000008838	MED24	-0.183201	1.69518	-1.11393	0.266635	0.409479	-6.09894
ENSG00000008869	HEATR5B	0.10557	0.637175	0.534994	0.593244	0.719464	-6.41158
ENSG00000008952	SEC62	0.0246052	3.48001	0.172371	0.863319	0.916578	-6.77183
ENSG00000008988	RPS20	-0.555227	4.50352	-3.3362	0.00101122	0.0055076	-1.42117
ENSG00000009307	CSDE1	-0.109239	3.65986	-0.934639	0.351093	0.498446	-6.35729
ENSG00000009335	UBE3C	-0.183085	0.993977	-1.31643	0.189525	0.317509	-5.78171
ENSG00000009413	REV3L	0.0337821	1.21006	0.167652	0.867025	0.91863	-6.63714
ENSG00000009780	FAM76A	-0.1607	-0.161792	-0.761524	0.447235	0.59214	-6.13276
ENSG00000009790	TRAF3IP3	0.445927	2.79171	2.3528	0.0195966	0.0582278	-4.05235
ENSG00000009830	POMT2	-0.688489	0.000445488	-2.93478	0.00372531	0.0158533	-2.35822
ENSG00000009844	VTA1	0.420983	0.431905	2.08079	0.0387172	0.0969555	-4.39044
ENSG00000009954	BAZ1B	-0.167962	0.123732	-1.20306	0.230365	0.368692	-5.77643
ENSG00000010017	RANBP9	0.359886	1.112	2.20272	0.0287483	0.0775857	-4.25049
ENSG00000010030	ETV7	2.49839	0.359175	6.10772	5.12426e-09	2.13742e-07	10.2724
ENSG00000010219	DYRK4	-0.445307	-0.558116	-1.73416	0.0844201	0.17562	-4.91337
ENSG00000010244	ZNF207	0.359364	3.55541	2.56131	0.011159	0.0377229	-3.5818
ENSG00000010256	UQCRC1	-0.479141	2.5323	-3.38006	0.000870194	0.00491462	-1.25753
ENSG00000010270	STARD3NL	0.0719923	1.38274	0.587829	0.557305	0.68922	-6.50012
ENSG00000010278	CD9	-1.24301	2.59674	-5.14456	6.34088e-07	1.35695e-05	5.55095
ENSG00000010292	NCAPD2	-0.0237232	0.382129	-0.134598	0.893064	0.935845	-6.52237
ENSG00000010295	IFFO1	-0.000131754	0.0755212	-0.000931054	0.999258	1	-6.44779
ENSG00000010310	GIPR	-0.876514	-0.478411	-3.89721	0.000132426	0.00106243	0.750898
ENSG00000010322	NISCH	-0.133759	1.32924	-0.990277	0.323226	0.468952	-6.18785
ENSG00000010327	STAB1	0.262042	2.42333	1.32963	0.185143	0.312134	-5.86847
ENSG00000010361	FUZ	-0.818491	-0.0843333	-3.75111	0.000230111	0.00165707	0.184906
ENSG00000010404	IDS	-0.307352	3.23594	-2.91722	0.00393246	0.016515	-2.65004
ENSG00000010539	ZNF200	0.225312	1.23496	1.35209	0.177861	0.302343	-5.7424
ENSG00000010610	CD4	-0.565548	1.83029	-3.40677	0.000793545	0.00456022	-1.14026
ENSG00000010626	LRRC23	-1.24366	0.221397	-5.27935	3.34272e-07	7.9291e-06	6.27554
ENSG00000010671	BTK	0.312108	1.84812	1.98553	0.0484415	0.115239	-4.76791
ENSG00000010803	SCMH1	-0.354064	-0.340709	-1.8449	0.0665197	0.146394	-4.73772
ENSG00000010810	FYN	0.384186	1.99248	2.14917	0.0328137	0.0856358	-4.44902
ENSG00000010818	HIVEP2	0.838934	1.91068	4.85117	2.45273e-06	4.26584e-05	4.31617
ENSG00000011007	ELOA	-0.229	0.195788	-1.44078	0.151198	0.269979	-5.48681
ENSG00000011009	LYPLA2	-0.0874683	1.79767	-0.697832	0.486087	0.627958	-6.47323
ENSG00000011021	CLCN6	0.365627	1.08648	2.18041	0.0303857	0.080777	-4.29465
ENSG00000011114	BTBD7	-0.0998652	0.700079	-0.708029	0.479746	0.622134	-6.34007
ENSG00000011132	APBA3	-0.00148812	0.704886	-0.0086236	0.993128	0.996468	-6.58593
ENSG00000011198	ABHD5	-0.61592	2.27595	-3.45875	0.000662162	0.00395664	-0.998519
ENSG00000011243	AKAP8L	-0.0998054	1.92099	-0.796114	0.426903	0.572817	-6.41058
ENSG00000011260	UTP18	0.580233	1.29253	3.62551	0.000365284	0.00241982	-0.345612
ENSG00000011275	RNF216	-0.214404	0.757248	-1.4425	0.150714	0.269294	-5.57779
ENSG00000011295	TTC19	-0.242445	0.637502	-1.63737	0.103114	0.202882	-5.27138
ENSG00000011304	PTBP1	-0.290301	2.98143	-2.16122	0.0318578	0.0838417	-4.48839
ENSG00000011405	PIK3C2A	-0.138726	0.180085	-0.757934	0.449376	0.594418	-6.20529
ENSG00000011422	PLAUR	0.302287	7.427	1.83018	0.0687009	0.150007	-5.13008
ENSG00000011451	WIZ	-0.335543	0.106467	-2.15256	0.0325419	0.0851153	-4.23857
ENSG00000011454	RABGAP1	0.476542	1.38886	3.27015	0.00126427	0.00660586	-1.50117
ENSG00000011485	PPP5C	-0.577045	0.234152	-2.86735	0.0045794	0.0186323	-2.57465
ENSG00000011523	CEP68	0.391054	1.13542	2.59124	0.0102625	0.0352122	-3.35256
ENSG00000011566	MAP4K3	-0.642965	0.633411	-3.04679	0.00262266	0.0119692	-2.12487
ENSG00000011600	TYROBP	0.00354672	6.82269	0.031802	0.974661	0.986182	-6.78219
ENSG00000011638	TMEM159	-0.118274	0.157005	-0.717369	0.473978	0.61731	-6.23553
ENSG00000012048	BRCA1	-0.163542	0.26564	-0.793783	0.428256	0.573884	-6.19786
ENSG00000012061	ERCC1	-0.426056	1.71303	-2.81096	0.00542707	0.021293	-2.88138
ENSG00000012124	CD22	1.02539	2.4123	3.72462	0.000253921	0.00179859	-0.0790173
ENSG00000012171	SEMA3B	0.0753463	-0.061496	0.394731	0.693459	0.797395	-6.33337
ENSG00000012211	PRICKLE3	-0.230144	-0.140419	-1.17974	0.239495	0.379155	-5.75801
ENSG00000012223	LTF	0.229483	1.20601	0.954134	0.341159	0.488065	-6.194
ENSG00000012232	EXTL3	0.0512671	1.56471	0.320083	0.749237	0.839459	-6.63825
ENSG00000012660	ELOVL5	0.351649	3.03377	2.84011	0.00497248	0.0198496	-2.84951
ENSG00000012779	ALOX5	0.137233	5.45866	0.820501	0.412901	0.559553	-6.46179
ENSG00000012822	CALCOCO1	-0.251559	1.92652	-1.94046	0.0537188	0.124601	-4.8826
ENSG00000012983	MAP4K5	-0.845341	0.644651	-4.29336	2.73388e-05	0.000295836	2.08076
ENSG00000013275	PSMC4	-0.182389	1.60705	-1.44266	0.150669	0.269294	-5.67515
ENSG00000013288	MAN2B2	-0.3449	0.693535	-2.57786	0.0106552	0.036294	-3.37333
ENSG00000013306	SLC25A39	-0.506831	1.34663	-3.26451	0.00128839	0.00670697	-1.55413
ENSG00000013364	MVP	0.0559967	4.16053	0.591961	0.55454	0.687681	-6.62012
ENSG00000013374	NUB1	1.19953	2.57512	5.30382	2.97225e-07	7.17127e-06	6.30845
ENSG00000013375	PGM3	-0.827849	-0.0163667	-3.74287	0.000237287	0.00170004	0.147459
ENSG00000013441	CLK1	0.321283	3.39949	2.30746	0.0220451	0.0637707	-4.17466
ENSG00000013561	RNF14	-0.173976	0.533936	-1.14241	0.254641	0.396126	-5.91732
ENSG00000013563	DNASE1L1	-0.106981	1.34464	-0.655161	0.513111	0.652003	-6.45636
ENSG00000013573	DDX11	-0.810897	0.762987	-2.81401	0.00537779	0.0211333	-2.79867
ENSG00000013583	HEBP1	-0.445866	0.199269	-2.57977	0.0105983	0.0361448	-3.29583
ENSG00000013588	GPRC5A	-1.1262	0.76615	-4.12289	5.46689e-05	0.00051946	1.4175
ENSG00000013725	CD6	-0.189319	1.06846	-0.986375	0.325132	0.470677	-6.16601
ENSG00000013810	TACC3	0.145667	1.93778	1.01471	0.311463	0.456529	-6.20691
ENSG00000014164	ZC3H3	0.260108	1.76613	1.59014	0.113372	0.217635	-5.4525
ENSG00000014216	CAPN1	-0.304235	2.86074	-2.78701	0.00582844	0.022562	-2.99578
ENSG00000014257	ACPP	0.573222	0.470901	2.66182	0.00839913	0.0299461	-3.06296
ENSG00000014824	SLC30A9	-0.13922	0.412697	-0.943601	0.346504	0.493344	-6.10054
ENSG00000014919	COX15	-0.0497343	0.392461	-0.300067	0.764436	0.85039	-6.48954
ENSG00000015133	CCDC88C	-0.401236	1.15286	-2.34826	0.0198305	0.0587631	-3.96874
ENSG00000015153	YAF2	0.430933	0.877871	2.1929	0.0294594	0.0788377	-4.23282
ENSG00000015171	ZMYND11	-0.468232	-0.106947	-2.62106	0.00943417	0.0328743	-3.1433
ENSG00000015285	WAS	0.487519	4.03017	3.77537	0.000210177	0.00153713	0.0407728
ENSG00000015475	BID	0.667454	4.43932	4.0489	7.33704e-05	0.000654813	1.02462
ENSG00000015479	MATR3	-0.105285	2.22997	-0.807747	0.420189	0.566466	-6.42365
ENSG00000015568	RGPD5	-0.709434	2.15999	-2.97693	0.00326824	0.0142629	-2.45711
ENSG00000015676	NUDCD3	-0.504295	0.570619	-2.93964	0.00366979	0.0156862	-2.42155
ENSG00000016864	GLT8D1	-0.142087	-0.00993508	-0.689392	0.49137	0.632956	-6.21841
ENSG00000017260	ATP2C1	-0.062626	1.99238	-0.410905	0.681579	0.788513	-6.64502
ENSG00000017483	SLC38A5	0.885212	-0.793804	2.93685	0.00370153	0.015784	-2.12709
ENSG00000017797	RALBP1	-0.148385	1.54082	-1.31334	0.190563	0.318869	-5.84618
ENSG00000018189	RUFY3	-0.285317	1.40491	-1.68893	0.0927792	0.187847	-5.28985
ENSG00000018280	SLC11A1	-0.457555	6.3612	-2.83753	0.00501136	0.0199497	-2.8696
ENSG00000018510	AGPS	-0.343951	0.678529	-2.1304	0.0343511	0.0887772	-4.38758
ENSG00000019144	PHLDB1	-0.112737	0.378665	-0.493491	0.622203	0.741791	-6.41728
ENSG00000019169	MARCO	-1.79584	3.00667	-7.15577	1.515e-11	1.8878e-09	15.8197
ENSG00000019582	CD74	-0.921521	6.83289	-3.80717	0.000186505	0.00140364	0.162041
ENSG00000020577	SAMD4A	-0.299167	0.140782	-1.15943	0.247654	0.388263	-5.85137
ENSG00000020633	RUNX3	0.722444	1.53701	3.61166	0.000384096	0.0025207	-0.407303
ENSG00000020922	MRE11	-0.2224	0.0309421	-1.42934	0.154457	0.273959	-5.47235
ENSG00000021355	SERPINB1	0.592455	5.72173	4.79507	3.15617e-06	5.16961e-05	4.00393
ENSG00000021574	SPAST	0.245948	1.32046	2.10766	0.0362972	0.0924237	-4.48207
ENSG00000021762	OSBPL5	-0.196903	0.276209	-0.904026	0.367062	0.514576	-6.12391
ENSG00000022277	RTF2	0.291666	3.40831	2.21974	0.0275513	0.0752956	-4.36739
ENSG00000022556	NLRP2	-0.138382	0.127295	-0.57677	0.564739	0.696129	-6.31041
ENSG00000022567	SLC45A4	0.325486	2.53357	1.89298	0.0597946	0.13471	-4.99032
ENSG00000022840	RNF10	0.200069	4.40486	1.61718	0.107403	0.209073	-5.50566
ENSG00000023041	ZDHHC6	0.173877	0.878885	1.09864	0.273236	0.417078	-5.9985
ENSG00000023171	GRAMD1B	0.906003	0.657263	4.05337	7.20841e-05	0.000646262	1.25195
ENSG00000023191	RNH1	-0.757184	2.88305	-4.86392	2.3154e-06	4.06289e-05	4.3097
ENSG00000023228	NDUFS1	-0.369592	0.945728	-2.48516	0.0137637	0.04477	-3.63241
ENSG00000023287	RB1CC1	0.212447	1.55997	1.62904	0.104868	0.205249	-5.37753
ENSG00000023318	ERP44	0.372456	0.725186	2.385	0.0180065	0.0547251	-3.78897
ENSG00000023330	ALAS1	-0.451125	1.91458	-2.77844	0.00597843	0.0230249	-2.98335
ENSG00000023445	BIRC3	0.968758	1.85689	5.68782	4.48201e-08	1.45614e-06	8.14713
ENSG00000023608	SNAPC1	0.333268	0.183524	1.58942	0.113533	0.21786	-5.23509
ENSG00000023697	DERA	-0.115295	-0.0168145	-0.617275	0.537751	0.674174	-6.26059
ENSG00000023734	STRAP	-0.193794	1.41414	-1.43893	0.151723	0.270578	-5.66093
ENSG00000023892	DEF6	0.327067	1.67104	2.00134	0.0466977	0.112011	-4.71973
ENSG00000023902	PLEKHO1	0.683072	2.21173	4.00018	8.88568e-05	0.000766614	0.902387
ENSG00000023909	GCLM	0.28473	1.56332	1.36442	0.173956	0.297813	-5.76391
ENSG00000024048	UBR2	0.203483	1.38826	1.64123	0.102309	0.201672	-5.33927
ENSG00000024862	CCDC28A	0.426537	0.358365	2.26357	0.0246666	0.0693169	-3.9983
ENSG00000025039	RRAGD	0.334328	1.44769	2.08144	0.0386572	0.0969189	-4.54648
ENSG00000025293	PHF20	0.0541324	2.43446	0.37547	0.707706	0.807448	-6.68409
ENSG00000025434	NR1H3	0.0196558	2.16063	0.0884052	0.929642	0.959087	-6.73692
ENSG00000025708	TYMP	0.364578	6.22815	2.62355	0.00936786	0.0327011	-3.43255
ENSG00000025770	NCAPH2	-0.229241	0.751605	-1.51532	0.131258	0.243059	-5.47645
ENSG00000025796	SEC63	-0.14693	1.76161	-0.95626	0.340087	0.486955	-6.26409
ENSG00000025800	KPNA6	-0.0310629	0.574088	-0.211598	0.832634	0.895983	-6.53606
ENSG00000026025	VIM	-0.305827	7.41316	-2.12502	0.0348033	0.0897339	-4.56093
ENSG00000026103	FAS	1.45308	2.15323	6.8719	7.7417e-11	6.68503e-09	14.2748
ENSG00000026297	RNASET2	0.324502	3.81903	2.23422	0.0265677	0.0733406	-4.3426
ENSG00000026508	CD44	0.204497	7.48061	1.53177	0.127147	0.237187	-5.61991
ENSG00000026652	AGPAT4	0.155533	0.870672	0.862039	0.389691	0.538025	-6.2189
ENSG00000026751	SLAMF7	2.6243	3.99691	9.61794	2.91938e-18	4.78972e-15	30.8791
ENSG00000026950	BTN3A1	1.41869	1.51476	5.66865	4.93661e-08	1.57269e-06	8.08956
ENSG00000027075	PRKCH	0.114144	3.76903	0.54227	0.588232	0.715148	-6.64431
ENSG00000027697	IFNGR1	0.303581	4.05893	1.81579	0.0708885	0.153638	-5.16898
ENSG00000027847	B4GALT7	-1.19157	-0.470713	-5.2763	3.39194e-07	8.02651e-06	6.31822
ENSG00000027869	SH2D2A	0.816941	-0.547671	2.93654	0.0037051	0.015784	-2.15944
ENSG00000028116	VRK2	0.138589	1.00205	0.920572	0.358375	0.505952	-6.19578
ENSG00000028137	TNFRSF1B	0.58901	5.68574	3.22297	0.0014798	0.00753215	-1.76943
ENSG00000028203	VEZT	-0.0237859	1.02213	-0.158628	0.874121	0.923564	-6.61565
ENSG00000028277	POU2F2	0.239166	1.83802	1.13447	0.257945	0.400128	-6.07021
ENSG00000028310	BRD9	-0.360569	1.28323	-2.41572	0.0165962	0.0514723	-3.83076
ENSG00000028528	SNX1	0.246861	3.38024	1.47868	0.140789	0.256463	-5.70284
ENSG00000028839	TBPL1	1.33222	1.28492	4.76253	3.64974e-06	5.86102e-05	4.01914
ENSG00000029153	ARNTL2	0.877712	0.335337	3.91576	0.000123315	0.00100158	0.780015
ENSG00000029363	BCLAF1	0.223587	2.69063	1.94565	0.0530877	0.123574	-4.90185
ENSG00000029364	SLC39A9	0.00309972	0.650005	0.0267249	0.978706	0.987939	-6.56908
ENSG00000029725	RABEP1	0.0536096	1.34853	0.387526	0.698776	0.80059	-6.59043
ENSG00000029993	HMGB3	-0.302961	1.42162	-0.809868	0.418972	0.565213	-6.36888
ENSG00000030066	NUP160	0.0874214	1.12074	0.514534	0.607443	0.73053	-6.50513
ENSG00000030110	BAK1	0.514973	0.145412	2.82121	0.00526314	0.0207407	-2.62011
ENSG00000030582	GRN	-0.294266	5.8222	-1.672	0.0960764	0.192309	-5.41412
ENSG00000031003	FAM13B	0.265432	1.65252	2.19065	0.0296247	0.07916	-4.34276
ENSG00000031081	ARHGAP31	0.639506	0.832797	3.39068	0.000838935	0.00476818	-1.0558
ENSG00000031698	SARS1	-0.21889	1.07177	-1.68917	0.092734	0.187847	-5.24709
ENSG00000031823	RANBP3	-0.219007	1.94572	-1.48557	0.138955	0.254385	-5.64407
ENSG00000032219	ARID4A	0.48789	1.60136	3.11826	0.0020855	0.00995137	-1.97433
ENSG00000032389	EIPR1	0.136302	0.247631	0.736174	0.462481	0.606133	-6.2156
ENSG00000032444	PNPLA6	-0.718105	4.13164	-4.34374	2.21869e-05	0.000251913	2.15152
ENSG00000032742	IFT88	-0.36933	-0.44168	-1.95235	0.0522821	0.122277	-4.54
ENSG00000033030	ZCCHC8	0.016543	-0.0144432	0.113494	0.909752	0.94618	-6.43611
ENSG00000033050	ABCF2	-0.311285	-0.380588	-1.26755	0.206422	0.338669	-5.61097
ENSG00000033100	CHPF2	0.18101	0.87848	1.32072	0.188092	0.315754	-5.74653
ENSG00000033170	FUT8	-0.279408	0.0488699	-1.03196	0.303327	0.448139	-5.9707
ENSG00000033178	UBA6	0.466941	1.81776	2.71174	0.00727143	0.0268365	-3.12236
ENSG00000033327	GAB2	0.152268	3.32786	1.06313	0.288993	0.433534	-6.22315
ENSG00000033627	ATP6V0A1	-0.0764922	2.89331	-0.531337	0.595771	0.721374	-6.63429
ENSG00000033800	PIAS1	0.392875	2.61943	2.9492	0.00356278	0.0153019	-2.53372
ENSG00000033867	SLC4A7	-0.343734	-0.0418712	-1.93501	0.0543896	0.125833	-4.64201
ENSG00000034152	MAP2K3	0.0277058	4.83719	0.176027	0.860449	0.914392	-6.78136
ENSG00000034239	EFCAB1	-1.18222	-0.593271	-4.40428	1.7222e-05	0.000205598	2.63956
ENSG00000034510	TMSB10	0.0727046	6.65818	0.386841	0.699282	0.800993	-6.71087
ENSG00000034677	RNF19A	0.122367	2.55166	0.890653	0.374178	0.521861	-6.36475
ENSG00000034713	GABARAPL2	0.560035	3.7296	3.35953	0.00093376	0.00517855	-1.33856
ENSG00000035115	SH3YL1	-0.797063	0.0452418	-3.92355	0.00011967	0.000975189	0.774137
ENSG00000035403	VCL	-0.224893	0.791233	-1.36597	0.173472	0.297107	-5.68366
ENSG00000035664	DAPK2	-0.166135	0.834905	-0.823832	0.411009	0.557835	-6.27644
ENSG00000035681	NSMAF	0.83943	3.67275	4.62539	6.67976e-06	9.62746e-05	3.30025
ENSG00000035687	ADSS2	-0.0682563	0.924896	-0.5151	0.607048	0.730267	-6.48521
ENSG00000035862	TIMP2	-0.329913	2.95301	-2.12071	0.0351688	0.0904392	-4.57083
ENSG00000035928	RFC1	0.15732	1.34881	0.879842	0.379993	0.527735	-6.27829
ENSG00000036054	TBC1D23	0.489813	0.906198	3.03283	0.00274139	0.0124132	-2.14766
ENSG00000036257	CUL3	0.0784143	2.66739	0.552482	0.58123	0.710102	-6.6129
ENSG00000036549	AC118549.1	-0.360615	-0.23769	-1.55118	0.122428	0.230436	-5.25256
ENSG00000037241	RPL26L1	-0.474486	0.0827403	-1.99031	0.0479092	0.114221	-4.5763
ENSG00000037474	NSUN2	-0.150417	0.816141	-1.09622	0.274291	0.418364	-6.01875
ENSG00000037637	FBXO42	-0.335521	0.032599	-2.53554	0.0119864	0.0400524	-3.37078
ENSG00000037749	MFAP3	0.10736	0.93456	0.712653	0.476885	0.619567	-6.35778
ENSG00000037897	METTL1	-0.273131	-0.602589	-1.16476	0.245494	0.385861	-5.68861
ENSG00000038210	PI4K2B	1.14316	0.240864	4.51231	1.08886e-05	0.000141485	3.07119
ENSG00000038219	BOD1L1	0.279601	2.40151	1.91575	0.0568131	0.129972	-4.94139
ENSG00000038274	MAT2B	0.572439	1.81088	3.88318	0.000139741	0.00110936	0.502134
ENSG00000038358	EDC4	0.0897874	1.20988	0.600742	0.548687	0.683187	-6.4722
ENSG00000038382	TRIO	-0.434167	2.61334	-2.81591	0.00534737	0.0210306	-2.91255
ENSG00000038427	VCAN	0.242311	4.35867	0.947071	0.344737	0.49154	-6.34904
ENSG00000038532	CLEC16A	0.00681565	1.05916	0.0483648	0.961473	0.977561	-6.63063
ENSG00000038945	MSR1	-1.81544	2.69487	-6.70301	2.0063e-10	1.52393e-08	13.3165
ENSG00000039068	CDH1	-1.15717	0.560333	-4.55639	9.00953e-06	0.000122669	3.13192
ENSG00000039123	MTREX	-0.24047	0.760459	-1.42069	0.156952	0.277038	-5.60696
ENSG00000039319	ZFYVE16	0.535702	3.21146	2.93099	0.00376913	0.0159933	-2.60228
ENSG00000039523	RIPOR1	0.131255	2.48023	0.879755	0.38004	0.527735	-6.37238
ENSG00000039560	RAI14	-0.797354	-0.519598	-3.55757	0.000466651	0.00296369	-0.399099
ENSG00000039650	PNKP	-0.394398	2.52474	-1.97256	0.0499138	0.117915	-4.85311
ENSG00000040341	STAU2	0.165731	1.78058	1.06447	0.288391	0.432829	-6.14883
ENSG00000040487	SLC66A1	-0.165711	-0.123835	-1.0379	0.30056	0.445522	-5.90409
ENSG00000040531	CTNS	0.286294	1.18388	1.73491	0.0842859	0.175377	-5.15282
ENSG00000040633	PHF23	0.135547	1.94922	0.917197	0.360136	0.507542	-6.30578
ENSG00000040933	INPP4A	0.156788	1.88956	1.06033	0.290262	0.434708	-6.15859
ENSG00000041357	PSMA4	0.689691	2.87638	3.43581	0.000717422	0.00420876	-1.07008
ENSG00000041802	LSG1	-0.0776753	0.109134	-0.448023	0.654618	0.768337	-6.3884
ENSG00000042062	RIPOR3	0.640722	0.285991	3.3789	0.000873685	0.00493042	-1.00495
ENSG00000042088	TDP1	-0.0750008	-0.107883	-0.397925	0.691107	0.795703	-6.3607
ENSG00000042429	MED17	0.124006	1.17962	1.18275	0.238302	0.377752	-5.94929
ENSG00000042445	RETSAT	-0.285338	0.547791	-2.132	0.0342178	0.0885024	-4.35531
ENSG00000042493	CAPG	-0.474125	4.28477	-3.11435	0.00211201	0.0100428	-2.09551
ENSG00000042753	AP2S1	-0.583532	2.41091	-3.29816	0.00115048	0.00609545	-1.51098
ENSG00000042832	TG	0.0162391	1.08752	0.0630496	0.94979	0.970046	-6.63302
ENSG00000042980	ADAM28	0.471779	0.432169	2.08658	0.0381849	0.0961115	-4.36546
ENSG00000043093	DCUN1D1	0.0984952	0.99013	0.602547	0.547488	0.681952	-6.44098
ENSG00000043143	JADE2	0.0542495	0.468661	0.293008	0.769817	0.854157	-6.5004
ENSG00000043462	LCP2	0.574183	6.83314	4.51078	1.09599e-05	0.000142146	2.82702
ENSG00000044115	CTNNA1	-0.318783	3.98662	-2.64594	0.00878956	0.0310569	-3.37908
ENSG00000044446	PHKA2	0.0859979	1.09946	0.472289	0.637232	0.754318	-6.52359
ENSG00000044574	HSPA5	-0.353206	3.80859	-2.03653	0.0430055	0.104997	-4.75513
ENSG00000046651	OFD1	-0.290865	0.0607602	-1.58444	0.114663	0.219643	-5.25596
ENSG00000047056	WDR37	0.261919	1.31395	1.74629	0.0822845	0.172306	-5.15571
ENSG00000047188	YTHDC2	0.41316	0.483517	2.68776	0.00779491	0.0282939	-3.02545
ENSG00000047249	ATP6V1H	0.362054	2.47152	2.51961	0.0125249	0.0415093	-3.65017
ENSG00000047315	POLR2B	0.142953	1.16321	1.05918	0.290784	0.435305	-6.08408
ENSG00000047346	FAM214A	0.0928576	0.789549	0.616095	0.538527	0.674633	-6.40437
ENSG00000047365	ARAP2	0.88868	1.9578	4.84528	2.51882e-06	4.35005e-05	4.29166
ENSG00000047410	TPR	0.108949	2.03062	0.776825	0.438173	0.583047	-6.42873
ENSG00000047457	CP	-0.678846	0.47291	-2.40461	0.0170948	0.0526208	-3.76815
ENSG00000047578	KIAA0556	-0.448327	1.40947	-3.02837	0.00278035	0.012578	-2.2545
ENSG00000047579	DTNBP1	0.874493	1.46831	5.44493	1.49876e-07	4.0758e-06	7.01209
ENSG00000047621	C12orf4	-0.0447678	0.484044	-0.231006	0.817544	0.887017	-6.52117
ENSG00000047644	WWC3	0.0960166	0.595591	0.741806	0.459069	0.603428	-6.28191
ENSG00000047849	MAP4	-0.216024	1.60311	-1.77353	0.0776523	0.164472	-5.15479
ENSG00000048052	HDAC9	-0.534448	-0.167409	-2.34704	0.019894	0.0588628	-3.7936
ENSG00000048342	CC2D2A	0.392124	3.24226	2.04996	0.0416635	0.102631	-4.71356
ENSG00000048392	RRM2B	-0.160576	1.17609	-0.850628	0.395986	0.543719	-6.30251
ENSG00000048405	ZNF800	-0.0803016	0.743258	-0.62291	0.534048	0.670557	-6.40442
ENSG00000048471	SNX29	-0.134777	1.01232	-0.887492	0.375872	0.523355	-6.2455
ENSG00000048649	RSF1	0.41749	2.11158	3.35899	0.000935489	0.00518119	-1.2881
ENSG00000048707	VPS13D	0.282463	1.94111	1.60515	0.110028	0.212919	-5.44791
ENSG00000048740	CELF2	0.26648	2.64074	2.02074	0.0446305	0.107947	-4.75265
ENSG00000048828	FAM120A	-0.178356	2.43015	-1.42624	0.155346	0.275139	-5.75336
ENSG00000048991	R3HDM1	-0.110296	1.41757	-0.539786	0.589941	0.716518	-6.53811
ENSG00000049089	COL9A2	-0.612122	-0.00852187	-2.36024	0.0192184	0.0574859	-3.78974
ENSG00000049239	H6PD	-0.226574	0.483341	-1.89553	0.0594541	0.134235	-4.80275
ENSG00000049245	VAMP3	0.339127	3.26402	1.80117	0.0731713	0.157511	-5.18195
ENSG00000049540	ELN	-0.623757	0.711032	-2.32256	0.0212014	0.0618024	-3.98986
ENSG00000049541	RFC2	-0.335118	0.303282	-1.93888	0.0539133	0.124964	-4.69651
ENSG00000049618	ARID1B	-0.144679	1.9146	-1.14331	0.254267	0.39579	-6.0829
ENSG00000049656	CLPTM1L	-0.120561	2.9764	-0.87373	0.383306	0.531205	-6.39928
ENSG00000049759	NEDD4L	-1.03223	1.0699	-4.58664	7.90523e-06	0.000110225	3.2166
ENSG00000049860	HEXB	-0.54872	3.25467	-3.48642	0.000600823	0.00365544	-0.932135
ENSG00000050130	JKAMP	0.0127307	0.705335	0.0756039	0.939809	0.965104	-6.56984
ENSG00000050327	ARHGEF5	-1.29839	-0.520814	-6.5173	5.62372e-10	3.43939e-08	12.3949
ENSG00000050344	NFE2L3	0.730205	1.736	3.53184	0.000511546	0.00319725	-0.690112
ENSG00000050405	LIMA1	-0.576433	0.0677274	-2.91478	0.00396208	0.0166195	-2.41838
ENSG00000050426	LETMD1	-0.309694	0.52556	-1.85124	0.0655992	0.144756	-4.89623
ENSG00000050438	SLC4A8	-0.740817	-0.0383848	-3.41907	0.000760411	0.00441882	-0.913514
ENSG00000050730	TNIP3	1.14926	3.22453	3.3651	0.000916079	0.00510928	-1.29855
ENSG00000050748	MAPK9	-0.418845	0.376797	-2.26049	0.0248603	0.0697024	-4.07161
ENSG00000050820	BCAR1	-2.24786	-0.257286	-8.99141	1.80118e-16	1.61189e-13	26.7732
ENSG00000051009	FAM160A2	-0.0282279	1.62667	-0.164409	0.869574	0.920439	-6.68354
ENSG00000051108	HERPUD1	0.310779	3.05735	1.91632	0.0567402	0.129835	-4.96807
ENSG00000051128	HOMER3	0.0206911	1.29545	0.119738	0.90481	0.942634	-6.65461
ENSG00000051382	PIK3CB	0.1087	1.4636	0.726391	0.468442	0.612012	-6.41731
ENSG00000051523	CYBA	-0.0214718	6.45084	-0.157079	0.87534	0.924455	-6.7744
ENSG00000051596	THOC3	-0.181174	0.172208	-0.712216	0.477155	0.619753	-6.26245
ENSG00000051620	HEBP2	-0.0172388	1.32457	-0.103644	0.917555	0.951481	-6.66461
ENSG00000051825	MPHOSPH9	-0.351475	-0.0300193	-1.51964	0.130168	0.241359	-5.33922
ENSG00000052126	PLEKHA5	-0.627517	-0.256478	-2.85363	0.00477371	0.0191649	-2.53249
ENSG00000052344	PRSS8	-0.614611	-0.204329	-2.66496	0.00832376	0.0297744	-3.02775
ENSG00000052723	SIKE1	0.584038	0.11369	2.60003	0.0100118	0.034581	-3.17018
ENSG00000052749	RRP12	-0.260148	1.98451	-1.53465	0.12644	0.236136	-5.57129
ENSG00000052795	FNIP2	0.773456	2.87572	4.09669	6.06994e-05	0.000562641	1.23242
ENSG00000052802	MSMO1	-0.554441	0.00418948	-3.06021	0.00251296	0.011565	-1.98293
ENSG00000052841	TTC17	0.20115	1.30055	1.48485	0.139146	0.254538	-5.56914
ENSG00000053254	FOXN3	-0.126366	2.80207	-0.903754	0.367205	0.51467	-6.36802
ENSG00000053371	AKR7A2	-0.827861	-0.456415	-4.1713	4.49998e-05	0.000443712	1.73896
ENSG00000053501	USE1	-0.422091	0.641638	-2.54605	0.0116425	0.039116	-3.44834
ENSG00000053524	MCF2L2	0.122618	0.562255	0.540089	0.589732	0.716353	-6.39948
ENSG00000053770	AP5M1	0.170715	0.590139	1.11587	0.265806	0.408588	-5.93897
ENSG00000053900	ANAPC4	-0.0704912	0.340168	-0.402937	0.687422	0.792572	-6.44961
ENSG00000053918	KCNQ1	-0.156919	0.706642	-0.952601	0.341934	0.488675	-6.14237
ENSG00000054116	TRAPPC3	-0.0129349	1.34081	-0.0838473	0.933261	0.961107	-6.6663
ENSG00000054118	THRAP3	0.117781	2.42196	1.00988	0.313765	0.459082	-6.24682
ENSG00000054148	PHPT1	-0.758131	0.299287	-2.95577	0.00349087	0.0150459	-2.35743
ENSG00000054267	ARID4B	0.788716	3.09129	4.79658	3.13498e-06	5.14346e-05	4.0321
ENSG00000054277	OPN3	-1.1069	0.257571	-5.89385	1.56615e-08	5.81781e-07	9.19628
ENSG00000054282	SDCCAG8	-0.0386973	1.66789	-0.258644	0.796174	0.873157	-6.66988
ENSG00000054523	KIF1B	0.447796	2.3754	3.48717	0.000599231	0.00364801	-0.889329
ENSG00000054611	TBC1D22A	-0.108287	1.21891	-0.922763	0.357234	0.505116	-6.24026
ENSG00000054654	SYNE2	-0.443663	2.32396	-2.60129	0.00997654	0.0344835	-3.45877
ENSG00000054965	FAM168A	0.322081	1.56525	2.08862	0.0379981	0.0957229	-4.53917
ENSG00000054967	RELT	-0.192662	3.00447	-1.15565	0.249192	0.39	-6.11813
ENSG00000054983	GALC	0.528773	2.94345	3.67133	0.000309048	0.00210683	-0.297053
ENSG00000055044	NOP58	-0.0547504	0.967188	-0.328767	0.742674	0.83467	-6.57482
ENSG00000055070	SZRD1	0.132093	2.4471	1.0696	0.286077	0.430823	-6.18724
ENSG00000055130	CUL1	0.72523	1.18954	4.077	6.56442e-05	0.000599445	1.27225
ENSG00000055147	FAM114A2	0.427188	0.459444	2.30011	0.0224664	0.064761	-3.9438
ENSG00000055163	CYFIP2	-0.0803461	3.26024	-0.457255	0.64798	0.763005	-6.67991
ENSG00000055208	TAB2	0.584693	3.01271	4.24108	3.38886e-05	0.000352642	1.77328
ENSG00000055211	GINM1	-0.27271	-0.0361633	-1.46707	0.143915	0.260711	-5.40634
ENSG00000055332	EIF2AK2	1.73539	2.736	7.03624	3.02495e-11	3.31014e-09	15.1748
ENSG00000055483	AC022966.1	-0.223211	2.07462	-1.46152	0.14543	0.262873	-5.68848
ENSG00000055609	KMT2C	0.0501878	2.75293	0.427093	0.669768	0.780167	-6.67674
ENSG00000055917	PUM2	0.387995	2.12191	3.086	0.00231396	0.0107956	-2.1159
ENSG00000055950	MRPL43	-0.341891	0.0318942	-1.81765	0.0706035	0.153223	-4.87469
ENSG00000055955	ITIH4	0.44267	0.307004	1.83822	0.067502	0.148059	-4.82937
ENSG00000056097	ZFR	-0.0561902	1.45095	-0.505989	0.613418	0.734967	-6.5562
ENSG00000056558	TRAF1	1.41636	2.26747	5.34269	2.46447e-07	6.09553e-06	6.50728
ENSG00000056586	RC3H2	-0.18728	1.55944	-1.13942	0.255881	0.397678	-6.06144
ENSG00000056972	TRAF3IP2	-0.141291	1.12039	-0.818259	0.414176	0.560664	-6.31926
ENSG00000057019	DCBLD2	-0.464791	-0.412535	-1.71411	0.0880458	0.181215	-4.97874
ENSG00000057149	SERPINB3	-0.808897	0.511203	-2.22188	0.0274044	0.0749983	-4.1968
ENSG00000057252	SOAT1	-0.361365	1.79668	-1.93481	0.0544136	0.125857	-4.88576
ENSG00000057608	GDI2	0.134896	3.20063	1.13786	0.256529	0.398433	-6.1388
ENSG00000057657	PRDM1	1.06383	1.96186	5.64798	5.47681e-08	1.717e-06	7.95511
ENSG00000057663	ATG5	-0.0194015	0.351529	-0.111851	0.911053	0.946828	-6.50987
ENSG00000057704	TMCC3	-0.066871	1.9042	-0.308352	0.758133	0.846152	-6.67315
ENSG00000057757	PITHD1	-0.340011	0.138352	-2.47828	0.0140239	0.0453817	-3.52985
ENSG00000058063	ATP11B	0.712841	3.77653	4.38494	1.86784e-05	0.000220203	2.32221
ENSG00000058091	CDK14	0.272684	1.30818	1.50053	0.135043	0.248991	-5.54503
ENSG00000058262	SEC61A1	0.0151726	2.20268	0.109952	0.912557	0.947696	-6.73385
ENSG00000058272	PPP1R12A	0.435577	3.83719	3.36267	0.000923764	0.00513759	-1.33101
ENSG00000058453	CROCC	-0.856246	1.43217	-4.15417	4.82182e-05	0.000468569	1.4858
ENSG00000058600	POLR3E	-0.209417	0.450791	-1.22372	0.222487	0.358985	-5.82091
ENSG00000058668	ATP2B4	0.0110797	1.68781	0.0679972	0.945855	0.968483	-6.69735
ENSG00000058673	ZC3H11A	0.484751	2.31821	3.47857	0.000617657	0.00374619	-0.913927
ENSG00000058799	YIPF1	0.637893	1.21194	4.11044	5.7459e-05	0.00053972	1.39617
ENSG00000059122	FLYWCH1	-0.576177	0.376922	-2.87432	0.00448346	0.018382	-2.57316
ENSG00000059145	UNKL	0.148496	1.3239	0.789661	0.430654	0.575765	-6.3513
ENSG00000059377	TBXAS1	0.0944988	3.91113	0.616764	0.538087	0.674311	-6.60269
ENSG00000059378	PARP12	1.45425	3.12526	5.4595	1.39547e-07	3.86783e-06	7.01944
ENSG00000059728	MXD1	0.751423	6.25107	4.5981	7.52188e-06	0.00010593	3.18007
ENSG00000059758	CDK17	0.533119	2.08085	3.18746	0.00166403	0.00828642	-1.80776
ENSG00000059804	SLC2A3	0.265399	6.19687	1.60842	0.10931	0.211881	-5.51489
ENSG00000059915	PSD	0.467535	0.520041	2.07153	0.0395834	0.0986683	-4.4221
ENSG00000060069	CTDP1	0.319614	2.14275	2.14416	0.0332183	0.0864396	-4.4765
ENSG00000060138	YBX3	-0.416563	3.60515	-2.98062	0.00323082	0.0141543	-2.47715
ENSG00000060237	WNK1	-0.245327	3.73715	-2.36852	0.0188054	0.0566117	-4.04574
ENSG00000060339	CCAR1	-0.0351281	1.55653	-0.246279	0.805717	0.879651	-6.66301
ENSG00000060491	OGFR	0.627658	2.94343	3.77791	0.000208187	0.00152712	0.0724872
ENSG00000060558	GNA15	0.127262	2.49653	0.886115	0.376612	0.524043	-6.36566
ENSG00000060642	PIGV	0.489094	-0.233385	2.30102	0.0224137	0.0646472	-3.80492
ENSG00000060656	PTPRU	-0.690054	-0.566131	-2.64994	0.00868979	0.0307595	-3.02056
ENSG00000060688	SNRNP40	-0.632229	0.0196831	-3.36519	0.000915819	0.00510928	-1.08265
ENSG00000060762	MPC1	-0.309588	0.239322	-1.55995	0.12034	0.227638	-5.33251
ENSG00000060971	ACAA1	0.0354595	2.99954	0.258439	0.796332	0.873157	-6.74261
ENSG00000060982	BCAT1	-0.0693709	1.97083	-0.428423	0.668801	0.779502	-6.63665
ENSG00000061273	HDAC7	-0.183961	2.47783	-1.54634	0.123591	0.232049	-5.58152
ENSG00000061936	SFSWAP	-0.0283557	1.5123	-0.207802	0.835593	0.897994	-6.66329
ENSG00000061938	TNK2	0.402011	2.24581	2.19312	0.0294433	0.0788251	-4.37806
ENSG00000061987	MON2	0.0446288	1.39158	0.329279	0.742287	0.834331	-6.61556
ENSG00000062038	CDH3	-0.479927	-0.649902	-2.08636	0.0382051	0.0961133	-4.23396
ENSG00000062194	GPBP1	0.733718	2.89521	4.84756	2.49302e-06	4.32827e-05	4.25476
ENSG00000062282	DGAT2	0.128874	3.62264	0.628375	0.53047	0.667341	-6.59165
ENSG00000062485	CS	-0.506221	2.19373	-4.78056	3.36778e-06	5.48881e-05	3.9716
ENSG00000062582	MRPS24	-0.127517	0.963069	-0.623349	0.53376	0.670367	-6.43988
ENSG00000062598	ELMO2	0.496043	2.21041	2.89926	0.00415508	0.0172791	-2.64644
ENSG00000062650	WAPL	0.10308	1.29852	0.764459	0.445488	0.590704	-6.36862
ENSG00000062716	VMP1	0.222857	5.28944	1.56035	0.120247	0.227506	-5.5949
ENSG00000062725	APPBP2	0.0306842	0.59564	0.20314	0.83923	0.90038	-6.54457
ENSG00000062822	POLD1	-0.401994	-0.0858476	-2.14893	0.0328327	0.0856625	-4.22337
ENSG00000063015	SEZ6	0.394687	-0.310351	1.53319	0.126799	0.236717	-5.19255
ENSG00000063046	EIF4B	-0.394259	2.93909	-3.3865	0.000851097	0.0048206	-1.24785
ENSG00000063169	BICRA	-0.0635485	0.110542	-0.402053	0.688071	0.793135	-6.39208
ENSG00000063177	RPL18	-0.361796	4.19785	-2.16132	0.03185	0.0838417	-4.50383
ENSG00000063241	ISOC2	-0.570979	0.223513	-2.61962	0.00947273	0.0329854	-3.22138
ENSG00000063244	U2AF2	-0.449132	2.77145	-2.89901	0.00415828	0.0172791	-2.69068
ENSG00000063245	EPN1	-0.206308	2.10064	-1.45022	0.148551	0.266704	-5.70458
ENSG00000063322	MED29	0.0086099	1.42636	0.0660807	0.947379	0.969136	-6.6704
ENSG00000063601	MTMR1	0.21972	0.607326	1.35444	0.177113	0.30154	-5.65147
ENSG00000063854	HAGH	-0.658583	0.847193	-4.01351	8.43348e-05	0.000734683	1.00975
ENSG00000063978	RNF4	0.0330165	1.80632	0.225895	0.821512	0.889512	-6.68891
ENSG00000064012	CASP8	0.365917	2.43263	2.37431	0.0185213	0.055958	-3.98992
ENSG00000064115	TM7SF3	-0.0776676	1.28886	-0.392376	0.695195	0.798444	-6.59186
ENSG00000064225	ST3GAL6	0.437384	2.21609	2.31433	0.0216576	0.0628714	-4.11189
ENSG00000064270	ATP2C2	-1.11512	0.584259	-4.23055	3.53776e-05	0.000364148	1.84271
ENSG00000064313	TAF2	0.0993142	1.03821	0.678757	0.498071	0.63845	-6.40267
ENSG00000064393	HIPK2	-0.560786	1.46186	-3.63722	0.000350055	0.00233465	-0.357261
ENSG00000064419	TNPO3	0.31782	0.897361	2.34877	0.0198041	0.058738	-3.90539
ENSG00000064490	RFXANK	0.0499929	1.2096	0.285121	0.775844	0.858176	-6.61227
ENSG00000064547	LPAR2	0.139703	3.08413	0.674812	0.500569	0.64078	-6.55047
ENSG00000064601	CTSA	-0.0860576	4.02895	-0.600015	0.549171	0.683357	-6.61509
ENSG00000064607	SUGP2	-0.416229	0.688411	-3.15559	0.00184721	0.00903281	-1.80812
ENSG00000064666	CNN2	0.174162	5.21575	1.52236	0.129487	0.240495	-5.65266
ENSG00000064687	ABCA7	-0.323018	2.21012	-2.08998	0.0378747	0.0955752	-4.60891
ENSG00000064726	BTBD1	-0.377726	1.68453	-1.9217	0.0560548	0.128763	-4.90581
ENSG00000064763	FAR2	0.456895	1.97266	3.2897	0.00118382	0.00624184	-1.49411
ENSG00000064886	CHI3L2	0.533793	-0.153506	2.31192	0.0217927	0.0632079	-3.79614
ENSG00000064932	SBNO2	0.360203	5.07934	2.6873	0.00780516	0.0283207	-3.27579
ENSG00000064961	HMG20B	-0.657525	0.934013	-4.52653	1.02448e-05	0.000135092	2.98554
ENSG00000064995	TAF11	0.0934971	-0.00348432	0.703132	0.482785	0.625005	-6.19637
ENSG00000064999	ANKS1A	-0.22839	0.788387	-1.70508	0.0897208	0.183391	-5.17841
ENSG00000065000	AP3D1	-0.074021	2.67978	-0.717006	0.474201	0.617383	-6.51209
ENSG00000065029	ZNF76	-0.308406	0.163961	-1.96946	0.0502713	0.11856	-4.61967
ENSG00000065054	SLC9A3R2	-1.22704	0.0662506	-4.80348	3.03953e-06	5.02033e-05	4.20091
ENSG00000065135	GNAI3	0.417379	1.33117	3.13825	0.00195454	0.00945481	-1.89019
ENSG00000065150	IPO5	-0.544448	0.61136	-3.14859	0.00188986	0.00919613	-1.82471
ENSG00000065154	OAT	-0.302999	1.19248	-1.83937	0.0673318	0.147851	-5.00894
ENSG00000065243	PKN2	0.0921581	1.3431	0.600502	0.548847	0.683187	-6.48537
ENSG00000065268	WDR18	-0.593162	-0.0751262	-2.69356	0.00766515	0.0279466	-2.98575
ENSG00000065357	DGKA	0.216309	3.2216	1.23491	0.218303	0.353998	-6.02492
ENSG00000065361	ERBB3	-0.535236	1.14768	-1.78454	0.0758415	0.161633	-5.11292
ENSG00000065413	ANKRD44	0.405364	3.05799	2.2329	0.0266558	0.0735013	-4.32872
ENSG00000065427	KARS1	0.410132	1.83999	2.43176	0.0158999	0.0498944	-3.81561
ENSG00000065457	ADAT1	0.298067	1.86237	1.52558	0.128683	0.239454	-5.56154
ENSG00000065518	NDUFB4	-0.430784	1.79556	-2.16895	0.031258	0.0826331	-4.41896
ENSG00000065526	SPEN	-0.188516	1.49624	-1.54864	0.123037	0.231361	-5.50972
ENSG00000065548	ZC3H15	0.159522	1.63869	1.22435	0.222249	0.358777	-5.95561
ENSG00000065559	MAP2K4	0.115649	1.20031	0.670615	0.503234	0.643021	-6.42653
ENSG00000065600	PACC1	0.0869597	-0.417244	0.437525	0.6622	0.7741	-6.24576
ENSG00000065613	SLK	0.407182	2.05852	2.49085	0.0135518	0.0442175	-3.69177
ENSG00000065615	CYB5R4	0.632936	2.81969	3.68143	0.000297801	0.00204574	-0.256365
ENSG00000065621	GSTO2	-0.0151949	0.468687	-0.0830182	0.933919	0.961462	-6.53567
ENSG00000065665	SEC61A2	-0.0933675	-0.209588	-0.400092	0.689513	0.79465	-6.32887
ENSG00000065717	TLE2	-1.01614	-0.903543	-4.24753	3.3006e-05	0.000345283	2.06828
ENSG00000065802	ASB1	-0.100386	0.189301	-0.590541	0.55549	0.688106	-6.318
ENSG00000065809	FAM107B	0.0401929	4.07973	0.279824	0.779899	0.860687	-6.7547
ENSG00000065882	TBC1D1	-0.0317675	2.71008	-0.269366	0.787923	0.866628	-6.7313
ENSG00000065883	CDK13	0.0400328	1.84366	0.371948	0.710323	0.809589	-6.64856
ENSG00000065911	MTHFD2	0.731505	2.66901	4.52934	1.0122e-05	0.000134287	2.93031
ENSG00000065923	SLC9A7	-0.101914	-0.411833	-0.459604	0.646296	0.761568	-6.26109
ENSG00000065970	FOXJ2	-0.231573	-0.102178	-1.78577	0.0756403	0.161344	-4.88461
ENSG00000065978	YBX1	-1.03912	4.23212	-6.27045	2.15298e-09	1.05442e-07	11.0106
ENSG00000065989	PDE4A	0.165256	1.33929	1.12944	0.260054	0.402447	-6.03228
ENSG00000066027	PPP2R5A	0.338777	1.42604	2.21961	0.0275601	0.0752988	-4.25277
ENSG00000066044	ELAVL1	-0.254906	0.542695	-1.52008	0.130058	0.241259	-5.44014
ENSG00000066084	DIP2B	0.603465	1.99083	4.0922	6.17946e-05	0.000570643	1.25791
ENSG00000066117	SMARCD1	-0.069791	0.799399	-0.481849	0.630436	0.749247	-6.48345
ENSG00000066135	KDM4A	-0.0920385	0.00302581	-0.578677	0.563454	0.694806	-6.27826
ENSG00000066136	NFYC	0.297891	2.49632	2.67075	0.0081864	0.0293577	-3.27586
ENSG00000066294	CD84	0.844817	1.00707	3.38155	0.000865732	0.00489223	-1.08909
ENSG00000066322	ELOVL1	-0.0542654	1.91903	-0.410343	0.68199	0.788711	-6.63727
ENSG00000066336	SPI1	0.159396	6.2436	1.38805	0.166654	0.288929	-5.83813
ENSG00000066379	ZNRD1	0.327403	-0.193082	1.47367	0.14213	0.258476	-5.3364
ENSG00000066422	ZBTB11	-0.0810064	0.0686182	-0.558839	0.576892	0.707126	-6.3144
ENSG00000066427	ATXN3	-0.111525	1.34277	-0.645924	0.519064	0.657075	-6.46975
ENSG00000066455	GOLGA5	0.45638	0.269702	2.51989	0.0125152	0.0414953	-3.40743
ENSG00000066629	EML1	-1.00899	-0.241157	-4.23818	3.42918e-05	0.000355335	1.96287
ENSG00000066654	THUMPD1	-0.319749	0.309154	-2.01678	0.0450457	0.108817	-4.55153
ENSG00000066739	ATG2B	0.0377872	-0.0581211	0.188404	0.85075	0.907639	-6.40231
ENSG00000066777	ARFGEF1	0.174525	1.82952	1.39669	0.164045	0.285866	-5.75006
ENSG00000066827	ZFAT	0.221816	0.079969	1.16934	0.243649	0.383548	-5.78737
ENSG00000066855	MTFR1	0.0831135	0.835255	0.368682	0.712752	0.811605	-6.5334
ENSG00000066923	STAG3	-0.330413	1.01597	-1.90654	0.0580038	0.131807	-4.86861
ENSG00000066933	MYO9A	-0.421925	0.352733	-2.22459	0.0272184	0.0746819	-4.13672
ENSG00000067048	DDX3Y	0.282052	0.953042	1.32005	0.188315	0.315912	-5.73055
ENSG00000067057	PFKP	-0.0589842	1.61394	-0.323647	0.746541	0.837399	-6.65223
ENSG00000067064	IDI1	0.678052	2.46965	3.54859	0.000481883	0.00304471	-0.683989
ENSG00000067066	SP100	1.04704	4.81169	8.24588	2.09064e-14	9.35466e-12	22.2251
ENSG00000067082	KLF6	0.467679	5.58801	3.73316	0.000246004	0.00175128	-0.109862
ENSG00000067167	TRAM1	0.0406263	2.14026	0.259589	0.795446	0.872756	-6.70285
ENSG00000067182	TNFRSF1A	0.0773743	5.06849	0.588016	0.55718	0.68922	-6.62501
ENSG00000067208	EVI5	-0.735637	0.97408	-3.71988	0.000258425	0.00182492	-0.0425763
ENSG00000067225	PKM	-0.30633	5.54427	-2.28559	0.0233192	0.0666148	-4.23463
ENSG00000067334	DNTTIP2	0.165208	2.43564	1.04452	0.297496	0.442246	-6.21157
ENSG00000067365	METTL22	-0.22876	2.07829	-1.37629	0.17026	0.29322	-5.80654
ENSG00000067369	TP53BP1	-0.229343	1.1648	-1.456	0.146951	0.264857	-5.61509
ENSG00000067560	RHOA	0.136491	5.76064	1.03753	0.300733	0.445671	-6.26035
ENSG00000067596	DHX8	0.256049	1.54875	1.95269	0.0522411	0.12221	-4.8114
ENSG00000067606	PRKCZ	-1.05637	-0.0731434	-4.53001	1.00929e-05	0.000134082	3.08673
ENSG00000067704	IARS2	-0.635282	-0.146721	-3.68318	0.000295889	0.0020383	-0.0325092
ENSG00000067798	NAV3	-0.25015	-0.231957	-0.740735	0.459717	0.604118	-6.14475
ENSG00000067829	IDH3G	0.00994721	1.45346	0.0624024	0.950304	0.970201	-6.67351
ENSG00000067836	ROGDI	-0.575878	0.447424	-3.0862	0.00231248	0.0107938	-1.99076
ENSG00000067900	ROCK1	0.136927	2.74806	1.06448	0.288385	0.432829	-6.2043
ENSG00000067955	CBFB	-0.177884	2.18328	-1.30203	0.194393	0.323956	-5.90902
ENSG00000068024	HDAC4	0.314397	3.46282	2.37422	0.0185257	0.055958	-4.0252
ENSG00000068028	RASSF1	-0.14071	-0.311492	-0.874158	0.383073	0.531048	-6.02027
ENSG00000068079	IFI35	1.34342	2.78113	5.30697	2.9276e-07	7.09095e-06	6.31824
ENSG00000068097	HEATR6	-0.0477877	0.654973	-0.265283	0.791063	0.869209	-6.5382
ENSG00000068120	COASY	-0.12097	1.06103	-0.91811	0.359659	0.507087	-6.22406
ENSG00000068305	MEF2A	0.600963	2.44871	4.25737	3.17017e-05	0.000334482	1.85898
ENSG00000068308	OTUD5	0.588682	2.17127	4.75486	3.77646e-06	6.04479e-05	3.88496
ENSG00000068323	TFE3	0.263341	3.1966	1.8535	0.0652724	0.144229	-5.08771
ENSG00000068366	ACSL4	0.418715	3.04089	2.69532	0.00762628	0.0278461	-3.23104
ENSG00000068383	INPP5A	0.275159	1.42185	1.51622	0.13103	0.242683	-5.52915
ENSG00000068400	GRIPAP1	0.472855	3.04815	3.6449	0.000340399	0.00227952	-0.391191
ENSG00000068438	FTSJ1	-0.0625363	-0.0887933	-0.324737	0.745717	0.837245	-6.38754
ENSG00000068650	ATP11A	0.111869	3.4102	0.832443	0.406145	0.553445	-6.44068
ENSG00000068654	POLR1A	-0.431744	-0.19892	-2.06069	0.0406169	0.100535	-4.37816
ENSG00000068697	LAPTM4A	-0.119633	2.92933	-0.79234	0.429094	0.574533	-6.46343
ENSG00000068724	TTC7A	-0.294492	1.43202	-1.90538	0.0581551	0.13205	-4.90903
ENSG00000068745	IP6K2	0.257191	2.0218	2.23925	0.026233	0.0726092	-4.26928
ENSG00000068784	SRBD1	0.584515	0.564617	2.69056	0.00773197	0.0281381	-3.01072
ENSG00000068796	KIF2A	0.111964	0.573945	0.655546	0.512864	0.651773	-6.33881
ENSG00000068831	RASGRP2	0.147639	2.47432	0.975914	0.330278	0.476374	-6.28297
ENSG00000068878	PSME4	-0.522916	1.09954	-3.59276	0.000411237	0.00266405	-0.479377
ENSG00000068885	IFT80	-0.0904221	0.402424	-0.427425	0.669526	0.779978	-6.4452
ENSG00000068903	SIRT2	-0.197864	1.80965	-1.55791	0.120825	0.228292	-5.52566
ENSG00000068912	ERLEC1	0.190949	0.494937	1.11407	0.266578	0.409454	-5.92262
ENSG00000068971	PPP2R5B	-0.472307	0.0909621	-2.75726	0.00636438	0.0241244	-2.83588
ENSG00000068976	PYGM	-0.262424	-0.211254	-1.04358	0.29793	0.44282	-5.87602
ENSG00000069011	PITX1	-1.14505	-0.523833	-5.00417	1.21993e-06	2.37802e-05	5.115
ENSG00000069020	MAST4	-0.3831	0.349749	-1.63337	0.103954	0.20393	-5.23936
ENSG00000069248	NUP133	-0.174492	0.56351	-0.944406	0.346093	0.492831	-6.13109
ENSG00000069275	NUCKS1	-0.723569	0.310957	-3.29422	0.00116589	0.00616713	-1.35052
ENSG00000069329	VPS35	-0.0641793	2.33481	-0.520054	0.603597	0.727628	-6.61673
ENSG00000069345	DNAJA2	-0.104357	1.7869	-1.0719	0.285049	0.429909	-6.14952
ENSG00000069399	BCL3	0.474567	5.36651	3.21835	0.00150263	0.00763651	-1.78439
ENSG00000069424	KCNAB2	-0.370012	3.23339	-2.3872	0.017902	0.0545595	-3.99777
ENSG00000069493	CLEC2D	0.978168	1.00763	4.75398	3.79129e-06	6.05868e-05	3.98221
ENSG00000069667	RORA	-0.303763	-0.089195	-1.43902	0.151698	0.270578	-5.45155
ENSG00000069849	ATP1B3	-0.0764834	3.08196	-0.492976	0.622567	0.741955	-6.65704
ENSG00000069869	NEDD4	-0.321253	3.39001	-0.954381	0.341034	0.487957	-6.33719
ENSG00000069943	PIGB	0.361448	1.52855	1.89718	0.0592342	0.133985	-4.90804
ENSG00000069956	MAPK6	0.24857	2.33879	1.73803	0.0837341	0.174746	-5.25659
ENSG00000069974	RAB27A	0.58812	3.1068	3.43835	0.000711081	0.00417903	-1.07313
ENSG00000070010	UFD1	-0.0912664	1.58391	-0.651252	0.515626	0.653932	-6.48995
ENSG00000070047	PHRF1	0.191698	0.808379	1.38375	0.167965	0.290333	-5.64585
ENSG00000070081	NUCB2	-0.329135	2.07796	-1.89134	0.0600141	0.135128	-4.98681
ENSG00000070087	PFN2	-0.693772	0.374678	-3.3186	0.00107357	0.00578128	-1.28766
ENSG00000070190	DAPP1	1.52463	2.11593	6.94378	5.14053e-11	4.86571e-09	14.6718
ENSG00000070214	SLC44A1	-0.0031719	0.00684032	-0.0178929	0.985742	0.992361	-6.45525
ENSG00000070269	TMEM260	0.378795	1.32045	2.1907	0.0296207	0.07916	-4.29453
ENSG00000070366	SMG6	0.0565065	1.07329	0.318837	0.750181	0.840134	-6.58555
ENSG00000070367	EXOC5	-0.0562069	1.35159	-0.417785	0.676549	0.784714	-6.58527
ENSG00000070413	DGCR2	0.436287	1.48539	2.8991	0.00415722	0.0172791	-2.58792
ENSG00000070423	RNF126	-0.648357	0.26176	-4.08952	6.24584e-05	0.000576233	1.35927
ENSG00000070444	MNT	-0.254779	2.15473	-1.56461	0.119243	0.22591	-5.53962
ENSG00000070476	ZXDC	-0.124951	0.780375	-1.06486	0.288214	0.432829	-6.0416
ENSG00000070495	JMJD6	0.338207	2.85763	2.42575	0.0161579	0.0504148	-3.88955
ENSG00000070501	POLB	0.364865	1.40349	1.95123	0.0524163	0.122504	-4.78864
ENSG00000070526	ST6GALNAC1	-0.667583	0.168285	-2.46794	0.0144228	0.0463218	-3.56804
ENSG00000070540	WIPI1	-0.0713496	1.93948	-0.477254	0.633698	0.751581	-6.61301
ENSG00000070610	GBA2	-0.0108851	1.77978	-0.0935638	0.925549	0.957296	-6.70858
ENSG00000070614	NDST1	-0.235185	1.80893	-1.35684	0.17635	0.300679	-5.81595
ENSG00000070669	ASNS	-0.127014	-0.370804	-0.580028	0.562544	0.694119	-6.22448
ENSG00000070729	CNGB1	0.358637	0.0379222	1.18947	0.235657	0.37513	-5.73104
ENSG00000070731	ST6GALNAC2	-0.137757	1.3379	-0.811506	0.418033	0.564642	-6.34758
ENSG00000070756	PABPC1	-0.467287	4.97021	-3.9289	0.000117224	0.000958431	0.582697
ENSG00000070761	CFAP20	-0.0998639	-0.284665	-0.420237	0.67476	0.783572	-6.31233
ENSG00000070770	CSNK2A2	-0.126276	0.817405	-0.95773	0.339347	0.486018	-6.15492
ENSG00000070814	TCOF1	0.153702	0.364822	0.912243	0.362731	0.510395	-6.10544
ENSG00000070831	CDC42	0.0328287	4.63992	0.371718	0.710494	0.80969	-6.72796
ENSG00000070882	OSBPL3	-0.226096	1.13787	-1.45483	0.147272	0.26534	-5.61048
ENSG00000070961	ATP2B1	0.181225	3.8505	0.902158	0.36805	0.515522	-6.38756
ENSG00000071051	NCK2	-0.0191452	0.877587	-0.129085	0.897419	0.93831	-6.60115
ENSG00000071054	MAP4K4	0.461428	4.28071	3.09876	0.00222092	0.0104257	-2.13924
ENSG00000071073	MGAT4A	0.603233	1.31907	3.23049	0.00144329	0.00736917	-1.6078
ENSG00000071082	RPL31	-0.396857	4.41635	-2.05588	0.0410839	0.101412	-4.72054
ENSG00000071127	WDR1	-0.182638	5.25498	-2.05319	0.041346	0.101956	-4.72512
ENSG00000071189	SNX13	0.34501	1.81846	2.6937	0.00766214	0.0279466	-3.17302
ENSG00000071205	ARHGAP10	-0.223447	-0.347007	-1.19695	0.232731	0.371494	-5.70171
ENSG00000071243	ING3	0.666864	0.219253	3.7672	0.000216703	0.00157317	0.28563
ENSG00000071246	VASH1	0.169343	0.421744	0.732711	0.464586	0.608163	-6.24563
ENSG00000071462	BUD23	-0.431331	1.11229	-2.58214	0.0105281	0.0359481	-3.41988
ENSG00000071537	SEL1L	-0.111532	2.35191	-0.702471	0.483196	0.625233	-6.50798
ENSG00000071553	ATP6AP1	-0.0615404	3.70081	-0.379986	0.704356	0.804838	-6.71797
ENSG00000071564	TCF3	0.176148	1.13619	0.89427	0.372244	0.520414	-6.23775
ENSG00000071575	TRIB2	0.61845	-0.28711	2.28393	0.0234184	0.0668515	-3.82291
ENSG00000071626	DAZAP1	-0.337718	1.86681	-2.17427	0.03085	0.0817038	-4.41416
ENSG00000071655	MBD3	-0.779011	0.476921	-4.07721	6.55902e-05	0.000599445	1.28521
ENSG00000071859	FAM50A	0.220021	2.63719	1.4103	0.159994	0.280746	-5.77913
ENSG00000071889	FAM3A	-0.433011	0.29292	-2.66343	0.00836048	0.0298515	-3.11318
ENSG00000071894	CPSF1	-0.377152	1.10112	-2.45179	0.0150665	0.0478279	-3.72766
ENSG00000071994	PDCD2	-0.354735	0.198581	-2.14678	0.0330063	0.0860016	-4.27801
ENSG00000072042	RDH11	-0.378481	0.32897	-2.03935	0.0427205	0.104512	-4.51369
ENSG00000072062	PRKACA	-0.250663	2.53107	-2.22403	0.0272565	0.0747181	-4.34023
ENSG00000072071	ADGRL1	-0.437045	-0.122031	-2.33018	0.0207864	0.0609173	-3.82533
ENSG00000072080	SPP2	-0.464424	-0.541367	-1.21074	0.227415	0.36514	-5.65639
ENSG00000072110	ACTN1	-0.191051	4.80959	-1.90204	0.0585925	0.132839	-5.01713
ENSG00000072121	ZFYVE26	0.460859	1.57503	3.16266	0.00180505	0.00886673	-1.84661
ENSG00000072134	EPN2	-0.477623	0.484087	-2.05866	0.0408132	0.100895	-4.512
ENSG00000072135	PTPN18	-0.329687	1.98573	-2.42049	0.0163864	0.05095	-3.87695
ENSG00000072210	ALDH3A2	-0.996576	0.951845	-5.55058	8.90449e-08	2.66431e-06	7.49334
ENSG00000072274	TFRC	-0.780923	3.74815	-3.95899	0.000104333	0.000874834	0.69479
ENSG00000072310	SREBF1	-0.0804184	2.70826	-0.622242	0.534486	0.670851	-6.57561
ENSG00000072364	AFF4	0.0824297	2.74511	0.740415	0.45991	0.604292	-6.49492
ENSG00000072401	UBE2D1	0.664979	2.86613	4.33948	2.25838e-05	0.000255534	2.16271
ENSG00000072415	MPP5	0.238685	0.0532692	1.4292	0.154496	0.273979	-5.45288
ENSG00000072501	SMC1A	-0.0492704	1.14434	-0.307647	0.758669	0.846558	-6.60046
ENSG00000072506	HSD17B10	-0.410486	0.243536	-2.2137	0.0279711	0.0760931	-4.14266
ENSG00000072518	MARK2	0.248856	2.93504	2.32786	0.0209122	0.0611404	-4.11798
ENSG00000072609	CHFR	0.160119	2.89768	1.48082	0.140217	0.2558	-5.68904
ENSG00000072682	P4HA2	-0.769875	0.895348	-3.17018	0.00176111	0.00869008	-1.80657
ENSG00000072694	FCGR2B	0.668168	1.93694	3.49583	0.000581199	0.00357359	-0.825962
ENSG00000072736	NFATC3	0.377251	0.679897	3.01025	0.00294399	0.013161	-2.18559
ENSG00000072756	TRNT1	0.245883	0.569144	1.32692	0.186036	0.313062	-5.67671
ENSG00000072778	ACADVL	-0.69895	3.83	-4.8974	1.98937e-06	3.58669e-05	4.44489
ENSG00000072786	STK10	0.0422145	4.72823	0.289403	0.772571	0.855669	-6.7551
ENSG00000072803	FBXW11	0.224361	1.61191	1.4724	0.142474	0.258862	-5.62187
ENSG00000072818	ACAP1	0.268485	3.19828	1.53673	0.125929	0.235469	-5.61208
ENSG00000072849	DERL2	0.148174	1.4342	0.974086	0.331182	0.477189	-6.20292
ENSG00000072858	SIDT1	-0.179493	-0.354855	-0.713767	0.476197	0.618994	-6.15452
ENSG00000072864	NDE1	-0.105168	2.32217	-0.888047	0.375574	0.523157	-6.3626
ENSG00000072952	MRVI1	0.247499	0.651974	1.18062	0.239147	0.378666	-5.85151
ENSG00000072958	AP1M1	-0.223862	2.08031	-1.54035	0.125045	0.2341	-5.56888
ENSG00000073008	PVR	-1.08199	-0.12247	-6.41673	9.75506e-10	5.43944e-08	11.8688
ENSG00000073050	XRCC1	-0.474551	0.281718	-3.04342	0.00265089	0.0120868	-2.07564
ENSG00000073060	SCARB1	-1.10702	-0.00629094	-6.41588	9.80034e-10	5.43944e-08	11.8616
ENSG00000073169	SELENOO	0.154413	0.115179	0.929741	0.353618	0.501298	-6.03722
ENSG00000073331	ALPK1	0.218034	3.23904	1.30057	0.194893	0.324404	-5.94382
ENSG00000073350	LLGL2	-1.26337	0.666766	-5.44423	1.50391e-07	4.0758e-06	7.01257
ENSG00000073417	PDE8A	-0.66176	1.00677	-3.64969	0.000334496	0.00225225	-0.286951
ENSG00000073578	SDHA	-0.367883	1.81978	-2.90912	0.00403152	0.0168734	-2.62054
ENSG00000073584	SMARCE1	-0.0376362	1.50426	-0.294245	0.768873	0.853495	-6.64403
ENSG00000073614	KDM5A	0.384329	2.59252	3.10814	0.00215479	0.010198	-2.07578
ENSG00000073737	DHRS9	-0.0785112	1.14005	-0.346062	0.729657	0.824465	-6.58346
ENSG00000073756	PTGS2	0.144695	5.07635	0.440892	0.659764	0.772077	-6.70011
ENSG00000073792	IGF2BP2	-0.362865	0.79552	-1.4841	0.139345	0.254634	-5.53361
ENSG00000073803	MAP3K13	-0.0912221	1.14755	-0.549597	0.583204	0.711348	-6.50115
ENSG00000073849	ST6GAL1	0.0964033	1.15358	0.567817	0.570792	0.701745	-6.48227
ENSG00000073910	FRY	-0.463391	0.422888	-2.49238	0.0134955	0.044063	-3.54981
ENSG00000073921	PICALM	0.362574	5.42366	2.76082	0.00629809	0.0239376	-3.08317
ENSG00000073969	NSF	0.294551	1.40537	1.89647	0.0593282	0.134096	-4.89783
ENSG00000074054	CLASP1	0.211412	1.60296	1.5564	0.121182	0.228747	-5.49058
ENSG00000074071	MRPS34	-0.563869	-0.18672	-2.54834	0.011569	0.0389084	-3.31446
ENSG00000074201	CLNS1A	-0.132171	1.33151	-0.738205	0.461249	0.605345	-6.40451
ENSG00000074319	TSG101	0.379349	2.20059	2.87593	0.00446157	0.0183075	-2.71594
ENSG00000074356	NCBP3	-0.396858	0.935972	-2.64534	0.00880463	0.0310989	-3.23942
ENSG00000074370	ATP2A3	0.293014	2.67474	1.8522	0.0654599	0.144546	-5.07361
ENSG00000074416	MGLL	0.00896263	2.28936	0.0373532	0.97024	0.983225	-6.7489
ENSG00000074603	DPP8	0.386825	1.07262	2.68978	0.00774955	0.0281812	-3.10009
ENSG00000074621	SLC24A1	0.446503	0.115708	2.0757	0.0391909	0.0978432	-4.35082
ENSG00000074657	ZNF532	-0.518109	0.267514	-2.08407	0.0384149	0.0964438	-4.4235
ENSG00000074660	SCARF1	0.289039	2.72251	1.26147	0.208598	0.341614	-5.97623
ENSG00000074695	LMAN1	-0.925508	0.293386	-5.17391	5.52117e-07	1.21862e-05	5.80376
ENSG00000074696	HACD3	-0.444742	0.113987	-2.35923	0.0192697	0.0576217	-3.80901
ENSG00000074706	IPCEF1	0.599797	0.960182	2.82791	0.00515844	0.0204099	-2.71469
ENSG00000074755	ZZEF1	0.101892	1.89009	0.998264	0.319349	0.464971	-6.22344
ENSG00000074800	ENO1	-0.281103	5.08927	-2.24672	0.0257425	0.071625	-4.32192
ENSG00000074842	MYDGF	-0.513004	1.83256	-2.83106	0.00510974	0.0202578	-2.83937
ENSG00000074935	TUBE1	-0.161474	0.433023	-0.690454	0.490703	0.632534	-6.30903
ENSG00000074964	ARHGEF10L	-0.0616028	1.63426	-0.316595	0.751879	0.841461	-6.6447
ENSG00000075089	ACTR6	-0.26389	0.272737	-1.15909	0.24779	0.388385	-5.86306
ENSG00000075142	SRI	-0.154331	2.06026	-0.922323	0.357463	0.505294	-6.31668
ENSG00000075151	EIF4G3	0.724934	2.61457	5.42684	1.63741e-07	4.34465e-06	6.86728
ENSG00000075223	SEMA3C	-1.39455	0.890268	-7.55374	1.44767e-12	2.79428e-10	18.1244
ENSG00000075234	TTC38	-0.0212774	0.904444	-0.100764	0.919838	0.952745	-6.59954
ENSG00000075239	ACAT1	-0.558514	1.19039	-2.96453	0.00339709	0.0147317	-2.4192
ENSG00000075240	GRAMD4	-0.00834843	1.13753	-0.0405505	0.967694	0.981655	-6.63646
ENSG00000075275	CELSR1	-1.26937	-0.407995	-5.6309	5.96671e-08	1.85288e-06	7.95888
ENSG00000075292	ZNF638	0.545614	3.58761	3.59836	0.000403006	0.00261538	-0.559078
ENSG00000075303	SLC25A40	0.529351	0.942984	2.46285	0.0146228	0.0467817	-3.63963
ENSG00000075399	VPS9D1	0.168122	3.53732	0.855766	0.393144	0.541123	-6.4231
ENSG00000075407	ZNF37A	-0.238341	-0.112894	-1.31893	0.188688	0.31643	-5.59521
ENSG00000075413	MARK3	0.360492	3.33974	3.66739	0.00031354	0.00213302	-0.323318
ENSG00000075415	SLC25A3	-0.570027	3.19258	-4.89371	2.02299e-06	3.62738e-05	4.43483
ENSG00000075420	FNDC3B	0.477696	5.12954	3.44596	0.000692448	0.00410136	-1.07192
ENSG00000075426	FOSL2	0.250476	5.30492	1.80314	0.0728599	0.15708	-5.1953
ENSG00000075539	FRYL	0.195407	2.0826	1.55826	0.12074	0.228219	-5.53255
ENSG00000075568	TMEM131	0.140354	1.33404	0.980466	0.328032	0.47376	-6.18417
ENSG00000075624	ACTB	0.285068	10.0389	2.27644	0.0238709	0.0676039	-4.21576
ENSG00000075651	PLD1	0.157119	2.28323	0.816405	0.415233	0.561708	-6.41194
ENSG00000075711	DLG1	-0.278296	0.975216	-1.86212	0.0640417	0.142052	-4.93582
ENSG00000075785	RAB7A	0.209179	4.91969	2.07241	0.0394997	0.098539	-4.68764
ENSG00000075790	BCAP29	-0.0446764	0.392863	-0.243312	0.808012	0.88114	-6.49313
ENSG00000075856	SART3	-0.0852164	1.21709	-0.626126	0.531941	0.66885	-6.46862
ENSG00000075884	ARHGAP15	0.735178	3.53781	3.81238	0.000182874	0.00138371	0.180243
ENSG00000075914	EXOSC7	-0.56161	-0.437536	-2.78273	0.00590292	0.022802	-2.68289
ENSG00000076043	REXO2	-0.26451	-0.346856	-1.19903	0.231924	0.370398	-5.7046
ENSG00000076053	RBM7	0.825851	1.50898	5.03665	1.04976e-06	2.08765e-05	5.15388
ENSG00000076067	RBMS2	-0.355445	0.226342	-1.47437	0.141944	0.258185	-5.45474
ENSG00000076108	BAZ2A	0.299157	3.52545	2.65076	0.00866939	0.0306984	-3.3584
ENSG00000076201	PTPN23	-0.451023	1.13313	-2.75766	0.00635695	0.0241055	-2.97668
ENSG00000076242	MLH1	0.149284	1.17396	1.02287	0.307596	0.452532	-6.12337
ENSG00000076382	SPAG5	-0.426053	0.0964798	-2.11189	0.0359278	0.0917713	-4.33303
ENSG00000076513	ANKRD13A	0.424954	2.92258	3.67504	0.000304865	0.00208844	-0.286047
ENSG00000076554	TPD52	-0.768505	-0.00247616	-3.07215	0.00241894	0.0111951	-1.98159
ENSG00000076555	ACACB	-0.388777	1.15907	-1.91954	0.0563285	0.129193	-4.85994
ENSG00000076604	TRAF4	-0.700945	0.889623	-3.30594	0.00112061	0.00597579	-1.38535
ENSG00000076641	PAG1	0.32067	3.46135	1.64113	0.102331	0.201672	-5.45545
ENSG00000076662	ICAM3	0.540577	3.68013	2.92408	0.00385033	0.0162463	-2.6309
ENSG00000076685	NT5C2	0.453048	4.03785	3.41271	0.000777387	0.00449096	-1.17403
ENSG00000076924	XAB2	-0.00654896	0.652642	-0.0518133	0.958729	0.975677	-6.56796
ENSG00000076928	ARHGEF1	0.182411	4.18978	1.29365	0.197269	0.326921	-5.96673
ENSG00000076944	STXBP2	0.43659	6.57253	2.8679	0.00457182	0.0186125	-2.78891
ENSG00000076984	MAP2K7	-0.613737	0.499709	-3.68685	0.000291919	0.0020166	-0.0975921
ENSG00000077044	DGKD	-0.0902674	2.59243	-0.503005	0.61551	0.736773	-6.63627
ENSG00000077097	TOP2B	0.191891	1.02062	1.49775	0.135763	0.250038	-5.51383
ENSG00000077147	TM9SF3	0.159388	2.06662	1.14032	0.255508	0.397223	-6.08604
ENSG00000077150	NFKB2	0.635862	4.88315	4.24563	3.32625e-05	0.00034686	1.76801
ENSG00000077157	PPP1R12B	-1.01161	0.477923	-5.30188	3.00013e-07	7.22086e-06	6.3689
ENSG00000077232	DNAJC10	-0.105321	0.581239	-0.550858	0.582342	0.710842	-6.41439
ENSG00000077235	GTF3C1	-0.036005	0.782393	-0.234475	0.814855	0.8858	-6.5658
ENSG00000077238	IL4R	0.212423	5.55286	1.29176	0.19792	0.327669	-5.97039
ENSG00000077254	USP33	0.0169787	2.17663	0.110058	0.912473	0.947696	-6.73537
ENSG00000077312	SNRPA	-0.366843	0.805531	-2.09723	0.037221	0.0942639	-4.47117
ENSG00000077327	SPAG6	-1.17431	-0.764082	-4.47616	1.27057e-05	0.000160972	2.93814
ENSG00000077380	DYNC1I2	-0.00896239	1.96669	-0.0588085	0.953163	0.971922	-6.72426
ENSG00000077420	APBB1IP	0.55125	3.66345	3.43601	0.000716921	0.00420876	-1.09362
ENSG00000077454	LRCH4	-0.0939389	3.26281	-0.688092	0.492186	0.633584	-6.54875
ENSG00000077458	FAM76B	0.263129	1.27862	1.33957	0.181895	0.307711	-5.76228
ENSG00000077463	SIRT6	0.166311	1.10895	0.968789	0.333812	0.47991	-6.1675
ENSG00000077514	POLD3	0.209955	0.912975	1.34012	0.181717	0.307531	-5.71357
ENSG00000077549	CAPZB	0.254007	4.36635	2.48131	0.0139086	0.0451274	-3.7854
ENSG00000077585	GPR137B	0.0667182	2.60217	0.39372	0.694204	0.797944	-6.6825
ENSG00000077684	JADE1	0.0133507	-0.0541217	0.0732152	0.941708	0.966204	-6.43151
ENSG00000077721	UBE2A	-0.0880214	2.33372	-0.681575	0.496291	0.637293	-6.51938
ENSG00000077782	FGFR1	-0.83263	0.249604	-3.18412	0.00168238	0.00835588	-1.68991
ENSG00000077984	CST7	1.1619	4.34854	4.60885	7.17848e-06	0.000102413	3.2258
ENSG00000078043	PIAS2	-0.624517	-0.0577957	-3.05674	0.00254091	0.0116664	-1.99925
ENSG00000078061	ARAF	-0.0803295	1.73155	-0.690426	0.490721	0.632534	-6.47269
ENSG00000078070	MCCC1	-0.0161289	-0.334682	-0.0684732	0.945477	0.968242	-6.37152
ENSG00000078081	LAMP3	1.76922	0.945033	5.15492	6.039e-07	1.30943e-05	5.75582
ENSG00000078098	FAP	1.98974	-0.0846837	4.75012	3.85702e-06	6.13385e-05	4.08756
ENSG00000078114	NEBL	-1.28348	-0.271495	-5.34382	2.45106e-07	6.093e-06	6.60987
ENSG00000078124	ACER3	-0.210343	1.58225	-1.22184	0.223197	0.359835	-5.96368
ENSG00000078140	UBE2K	0.0304673	1.9106	0.200903	0.840977	0.901408	-6.6995
ENSG00000078142	PIK3C3	0.115165	1.53077	0.828891	0.408147	0.554868	-6.34209
ENSG00000078269	SYNJ2	0.15421	0.299723	0.880359	0.379714	0.527505	-6.12392
ENSG00000078304	PPP2R5C	0.395329	3.86213	3.68423	0.000294749	0.00203187	-0.273348
ENSG00000078369	GNB1	0.227856	4.82415	2.42087	0.0163697	0.0509303	-3.92984
ENSG00000078401	EDN1	0.439124	0.462029	1.47263	0.14241	0.258842	-5.4488
ENSG00000078403	MLLT10	-0.0999388	1.13802	-0.517816	0.605155	0.728881	-6.5145
ENSG00000078487	ZCWPW1	0.453158	1.3454	2.31704	0.0215063	0.0625431	-4.02494
ENSG00000078618	NRDC	0.34196	3.81656	2.97564	0.00328148	0.0142996	-2.48993
ENSG00000078668	VDAC3	-0.0593501	1.13774	-0.367097	0.713932	0.812573	-6.58394
ENSG00000078674	PCM1	-0.0273101	2.61811	-0.200178	0.841543	0.901529	-6.74443
ENSG00000078687	TNRC6C	0.116434	0.171289	0.651934	0.515187	0.653544	-6.2561
ENSG00000078699	CBFA2T2	-0.0942361	-0.0307092	-0.619973	0.535976	0.672292	-6.25799
ENSG00000078747	ITCH	0.0726381	2.37879	0.528356	0.597834	0.723086	-6.61207
ENSG00000078804	TP53INP2	-0.221771	1.77895	-1.26255	0.208209	0.34109	-5.93149
ENSG00000078808	SDF4	-0.0886191	3.00918	-0.713673	0.476255	0.618994	-6.52488
ENSG00000078814	MYH7B	-0.189877	-0.265902	-0.998456	0.319256	0.464904	-5.91613
ENSG00000078902	TOLLIP	0.0953534	2.43725	0.657283	0.511749	0.650692	-6.53941
ENSG00000078967	UBE2D4	-1.28519	0.438958	-4.15098	4.88412e-05	0.000472945	1.54952
ENSG00000079134	THOC1	-0.709012	0.160367	-3.81768	0.000179254	0.00136155	0.389932
ENSG00000079215	SLC1A3	0.508111	2.16412	2.48872	0.0136306	0.0444304	-3.70021
ENSG00000079246	XRCC5	-0.000680119	2.83084	-0.00567702	0.995476	0.997538	-6.77117
ENSG00000079263	SP140	1.69354	2.62118	6.63241	2.97485e-10	2.07691e-08	12.9643
ENSG00000079277	MKNK1	-0.0942944	4.35606	-0.606112	0.545123	0.679781	-6.61352
ENSG00000079308	TNS1	-0.116113	1.91872	-0.559969	0.576123	0.706358	-6.57038
ENSG00000079313	REXO1	-0.327634	1.50762	-1.48535	0.139015	0.254385	-5.61484
ENSG00000079332	SAR1A	0.189524	2.07129	1.4767	0.141318	0.257236	-5.65405
ENSG00000079335	CDC14A	0.116542	0.213642	0.728884	0.466919	0.610486	-6.22241
ENSG00000079385	CEACAM1	1.09165	3.3982	5.33719	2.53077e-07	6.24383e-06	6.43546
ENSG00000079387	SENP1	0.382235	0.631579	2.3768	0.0184	0.0556295	-3.79032
ENSG00000079432	CIC	-0.0966641	2.34735	-0.677966	0.498571	0.638855	-6.52412
ENSG00000079459	FDFT1	-0.276923	1.77132	-1.85181	0.0655158	0.144637	-5.03758
ENSG00000079739	PGM1	-0.194018	0.279401	-1.08807	0.277863	0.421917	-5.94316
ENSG00000079785	DDX1	0.141722	0.0121532	0.687284	0.492694	0.633832	-6.22276
ENSG00000079805	DNM2	-0.392166	4.52792	-3.36879	0.000904575	0.00506521	-1.31836
ENSG00000079819	EPB41L2	-0.410511	0.0879731	-2.00301	0.046516	0.111684	-4.5574
ENSG00000079950	STX7	0.322712	2.41429	2.32492	0.0210721	0.0615164	-4.10147
ENSG00000079974	RABL2B	-1.04813	0.626926	-5.43751	1.5542e-07	4.19167e-06	6.98536
ENSG00000079999	KEAP1	0.114073	1.13884	0.695907	0.487289	0.629143	-6.40377
ENSG00000080189	SLC35C2	0.0135958	1.08189	0.09524	0.924219	0.956276	-6.63203
ENSG00000080298	RFX3	-0.449365	0.540185	-2.32034	0.0213235	0.0621032	-3.96205
ENSG00000080345	RIF1	0.377662	0.673122	2.92556	0.0038328	0.0161932	-2.42069
ENSG00000080371	RAB21	0.33943	3.00168	2.1821	0.0302589	0.0805486	-4.43675
ENSG00000080503	SMARCA2	-0.509364	3.19725	-2.1973	0.0291388	0.0782228	-4.41885
ENSG00000080603	SRCAP	-0.199642	1.64535	-1.55705	0.121029	0.228545	-5.51263
ENSG00000080608	PUM3	-0.264289	-0.123448	-1.24926	0.213019	0.347237	-5.68115
ENSG00000080802	CNOT4	0.175182	0.825614	1.408	0.160672	0.281533	-5.61296
ENSG00000080815	PSEN1	0.324007	4.00895	2.67169	0.00816431	0.0293212	-3.31101
ENSG00000080822	CLDND1	0.352647	1.96143	2.10884	0.0361935	0.0922549	-4.53255
ENSG00000080823	MOK	-0.860975	0.934795	-3.44856	0.000686199	0.00407661	-0.946615
ENSG00000080824	HSP90AA1	-0.326434	5.01763	-2.02735	0.0439437	0.106784	-4.77677
ENSG00000080845	DLGAP4	0.0386098	2.14214	0.332084	0.740171	0.832428	-6.68295
ENSG00000081019	RSBN1	0.0811956	0.546208	0.458312	0.647222	0.762203	-6.43427
ENSG00000081041	CXCL2	-0.619658	4.60383	-2.2185	0.027637	0.0754468	-4.38299
ENSG00000081059	TCF7	0.332844	0.287934	1.61543	0.107783	0.209522	-5.19506
ENSG00000081087	OSTM1	0.116999	2.42003	0.819915	0.413233	0.55985	-6.41968
ENSG00000081154	PCNP	0.271404	1.98402	1.89671	0.0592973	0.134066	-4.95235
ENSG00000081189	MEF2C	-0.423076	1.67501	-1.44743	0.149332	0.267618	-5.68304
ENSG00000081237	PTPRC	0.579062	6.39523	3.62713	0.000363133	0.00240719	-0.467993
ENSG00000081307	UBA5	-0.713202	-0.216251	-3.40964	0.000785707	0.00452046	-0.919917
ENSG00000081320	STK17B	0.456808	3.7557	2.76757	0.0061739	0.0235749	-3.05746
ENSG00000081665	ZNF506	-0.473933	0.847286	-2.85409	0.00476711	0.0191462	-2.68759
ENSG00000081760	AACS	-0.516792	1.09883	-2.29513	0.0227557	0.0654992	-4.09538
ENSG00000081791	DELE1	0.0314267	1.19033	0.22404	0.822953	0.890041	-6.62425
ENSG00000081870	HSPB11	-0.298335	-0.368805	-1.30484	0.193436	0.322634	-5.56241
ENSG00000081913	PHLPP1	-0.0486513	0.811396	-0.253995	0.799759	0.875607	-6.56683
ENSG00000081923	ATP8B1	-0.0563119	-0.437673	-0.231135	0.817445	0.887007	-6.33162
ENSG00000082014	SMARCD3	0.802693	1.19874	3.39572	0.000824469	0.0046968	-1.06348
ENSG00000082068	WDR70	0.0228981	0.165584	0.131617	0.895418	0.937474	-6.47113
ENSG00000082074	FYB1	1.00866	4.79922	6.16986	3.6861e-09	1.62717e-07	10.4913
ENSG00000082153	BZW1	0.0879133	3.6416	0.739868	0.460242	0.604485	-6.5171
ENSG00000082212	ME2	-0.00593921	1.71376	-0.0513947	0.959062	0.975714	-6.7061
ENSG00000082213	C5orf22	0.097509	-0.0350966	0.521842	0.602354	0.726708	-6.3027
ENSG00000082258	CCNT2	0.432081	1.32157	2.70321	0.00745379	0.0273685	-3.09573
ENSG00000082397	EPB41L3	-0.138441	2.62203	-0.785481	0.433094	0.578164	-6.4605
ENSG00000082515	MRPL22	-0.245961	-0.246822	-1.16502	0.245389	0.385757	-5.741
ENSG00000082641	NFE2L1	-0.319764	2.43358	-1.97049	0.0501523	0.118336	-4.8536
ENSG00000082701	GSK3B	-0.0161507	1.60919	-0.126981	0.899082	0.939525	-6.68854
ENSG00000082781	ITGB5	-1.50547	0.203662	-6.50011	6.18132e-10	3.73306e-08	12.2938
ENSG00000082805	ERC1	-0.167959	1.66085	-1.06271	0.289184	0.433688	-6.15105
ENSG00000082898	XPO1	0.0851921	2.69774	0.621306	0.5351	0.67145	-6.57359
ENSG00000082996	RNF13	0.56819	4.55227	3.65067	0.000333304	0.00224729	-0.392314
ENSG00000083099	LYRM2	0.0822474	0.194595	0.471038	0.638123	0.754829	-6.36888
ENSG00000083168	KAT6A	0.393986	2.75566	3.19695	0.00161278	0.0081001	-1.81769
ENSG00000083223	TUT7	0.324828	3.16585	2.00406	0.0464029	0.111466	-4.80289
ENSG00000083290	ULK2	-0.639709	0.323518	-2.91923	0.00390822	0.0164483	-2.44277
ENSG00000083312	TNPO1	-0.0640422	2.35275	-0.548019	0.584286	0.712022	-6.60389
ENSG00000083444	PLOD1	-0.404153	1.39285	-2.73993	0.00669683	0.0251713	-3.04505
ENSG00000083457	ITGAE	-0.495477	0.714251	-2.91321	0.00398124	0.0166843	-2.51534
ENSG00000083520	DIS3	0.0159898	0.145664	0.122624	0.902527	0.941551	-6.472
ENSG00000083535	PIBF1	0.146325	-0.30738	0.734099	0.463742	0.607405	-6.10923
ENSG00000083642	PDS5B	0.200649	0.878459	1.64509	0.101511	0.200376	-5.2676
ENSG00000083799	CYLD	0.75743	2.86328	6.25394	2.35254e-09	1.11876e-07	10.9445
ENSG00000083828	ZNF586	-0.148948	0.827297	-1.0481	0.29585	0.440397	-6.06378
ENSG00000083844	ZNF264	-0.169057	0.617043	-1.01869	0.309571	0.454703	-6.06305
ENSG00000083845	RPS5	-0.614487	3.51472	-3.12485	0.00204145	0.00977045	-2.06007
ENSG00000083857	FAT1	-0.431366	-0.314864	-1.73526	0.0842234	0.175284	-4.94568
ENSG00000083896	YTHDC1	0.213038	2.65679	1.59231	0.112883	0.21695	-5.51078
ENSG00000083937	CHMP2B	0.990703	2.03461	6.4	1.06859e-09	5.84402e-08	11.7358
ENSG00000084070	SMAP2	0.47469	3.98935	2.35365	0.0195532	0.0582042	-4.0783
ENSG00000084072	PPIE	-0.48329	-0.29616	-2.64719	0.00875824	0.0309606	-3.05917
ENSG00000084073	ZMPSTE24	-0.0114541	0.949634	-0.0860081	0.931545	0.960324	-6.61908
ENSG00000084090	STARD7	-0.27377	1.21496	-1.68464	0.0936056	0.18889	-5.27205
ENSG00000084093	REST	-0.117008	0.779458	-0.9056	0.366229	0.513775	-6.19215
ENSG00000084110	HAL	-0.085902	1.29287	-0.3177	0.751041	0.840811	-6.60552
ENSG00000084112	SSH1	-0.417481	2.03195	-2.40985	0.0168578	0.0521031	-3.90395
ENSG00000084207	GSTP1	-1.20229	3.53202	-4.60605	7.26645e-06	0.000103368	3.21279
ENSG00000084234	APLP2	-0.460534	5.14152	-4.33893	2.26349e-05	0.000255819	2.1322
ENSG00000084463	WBP11	-0.175655	0.676445	-1.28988	0.198572	0.328527	-5.77342
ENSG00000084623	EIF3I	-0.53078	1.98818	-3.53893	0.000498783	0.00313139	-0.719371
ENSG00000084652	TXLNA	-0.205926	0.490673	-1.44513	0.149974	0.268377	-5.52858
ENSG00000084676	NCOA1	0.197327	2.37322	1.25137	0.21225	0.346212	-5.97352
ENSG00000084733	RAB10	-0.0128197	3.9164	-0.0998922	0.920529	0.95316	-6.78692
ENSG00000084754	HADHA	-0.288943	2.16954	-3.12434	0.00204481	0.00977616	-2.02314
ENSG00000084764	MAPRE3	-0.902322	-0.262482	-4.68712	5.09682e-06	7.71894e-05	3.75592
ENSG00000084774	CAD	-0.215212	-0.281508	-0.992838	0.32198	0.467695	-5.93712
ENSG00000085063	CD59	-0.128594	3.36864	-0.888999	0.375064	0.522672	-6.39414
ENSG00000085117	CD82	0.22126	5.05987	1.45769	0.146482	0.264194	-5.74751
ENSG00000085224	ATRX	0.214841	2.22627	1.39137	0.165647	0.287894	-5.78145
ENSG00000085231	AK6	0.0668612	0.356385	0.310434	0.756552	0.84477	-6.46696
ENSG00000085265	FCN1	0.529986	1.98097	3.02528	0.00280768	0.0126725	-2.27463
ENSG00000085276	MECOM	-0.332994	-0.373855	-1.2561	0.210535	0.344041	-5.63355
ENSG00000085365	SCAMP1	0.164909	0.192441	1.0262	0.30603	0.450982	-5.96359
ENSG00000085415	SEH1L	-0.399888	0.120929	-2.51952	0.0125279	0.0415093	-3.43527
ENSG00000085433	WDR47	-0.0508205	0.254748	-0.270422	0.787112	0.865942	-6.47289
ENSG00000085449	WDFY1	0.622015	2.51032	3.99751	8.97905e-05	0.000773991	0.876107
ENSG00000085491	SLC25A24	0.017422	0.992792	0.115957	0.907802	0.945051	-6.60841
ENSG00000085511	MAP3K4	-0.543418	-0.0899996	-2.63787	0.0089943	0.031678	-3.11036
ENSG00000085514	PILRA	0.297976	4.32402	1.78605	0.0755953	0.161318	-5.22372
ENSG00000085662	AKR1B1	-1.35799	0.937852	-6.24134	2.51693e-09	1.18549e-07	10.9142
ENSG00000085719	CPNE3	-0.130877	1.23523	-0.752348	0.45272	0.597156	-6.38716
ENSG00000085721	RRN3	-0.22835	0.102664	-1.34914	0.178807	0.303582	-5.59829
ENSG00000085733	CTTN	-0.837581	0.402051	-3.26876	0.00127017	0.00663319	-1.4563
ENSG00000085788	DDHD2	-0.348656	0.0384414	-1.73579	0.0841294	0.175185	-5.01452
ENSG00000085831	TTC39A	-0.334881	-0.389271	-1.47001	0.143119	0.259698	-5.33947
ENSG00000085832	EPS15	0.20399	1.90603	1.78274	0.0761336	0.162041	-5.14961
ENSG00000085871	MGST2	-0.360881	-0.103286	-1.79325	0.0744323	0.159424	-4.88982
ENSG00000085872	CHERP	-0.114426	0.809355	-0.945196	0.345691	0.492543	-6.16901
ENSG00000085978	ATG16L1	-0.496639	0.623656	-2.95878	0.00345841	0.0149339	-2.36672
ENSG00000085982	USP40	-0.504846	-0.0671425	-2.1719	0.031031	0.0821375	-4.17869
ENSG00000085998	POMGNT1	-1.14866	-0.300127	-5.45251	1.44415e-07	3.95995e-06	7.1168
ENSG00000086015	MAST2	-0.782611	0.243517	-4.87213	2.23095e-06	3.93574e-05	4.48579
ENSG00000086061	DNAJA1	0.602671	3.99621	4.3534	2.13111e-05	0.000244222	2.19409
ENSG00000086062	B4GALT1	0.166547	3.09293	1.18432	0.237683	0.377198	-6.08274
ENSG00000086065	CHMP5	0.847994	2.20889	5.21881	4.46275e-07	1.01693e-05	5.92623
ENSG00000086102	NFX1	-0.19536	0.817182	-1.40259	0.162277	0.283539	-5.64311
ENSG00000086200	IPO11	0.830282	1.58277	3.70412	0.000273927	0.00191788	-0.0864251
ENSG00000086232	EIF2AK1	-0.275492	1.02584	-1.92306	0.0558819	0.128468	-4.8298
ENSG00000086300	SNX10	0.64374	4.2871	3.65252	0.000331059	0.00223551	-0.384086
ENSG00000086504	MRPL28	-0.0320399	1.03663	-0.217222	0.828255	0.893028	-6.61179
ENSG00000086544	ITPKC	-0.0487285	0.69674	-0.235476	0.814079	0.885306	-6.55697
ENSG00000086548	CEACAM6	-0.506143	1.1575	-1.62875	0.104929	0.205311	-5.35917
ENSG00000086589	RBM22	0.334828	1.72656	2.72392	0.00701793	0.026109	-3.0883
ENSG00000086598	TMED2	-0.300796	2.56504	-1.92824	0.0552308	0.12742	-4.93839
ENSG00000086619	ERO1B	0.309904	-0.0824207	1.59762	0.111696	0.215299	-5.15108
ENSG00000086666	ZFAND6	0.303746	2.96313	2.18172	0.0302875	0.0806028	-4.43709
ENSG00000086730	LAT2	0.246597	3.66523	1.91998	0.0562733	0.129097	-4.97495
ENSG00000086758	HUWE1	-0.159174	2.24724	-1.46233	0.145209	0.262572	-5.69327
ENSG00000086848	ALG9	-0.688317	0.417732	-3.19269	0.00163561	0.00817721	-1.68014
ENSG00000087008	ACOX3	0.0581686	0.18691	0.357951	0.720755	0.817974	-6.41903
ENSG00000087074	PPP1R15A	0.549205	6.3242	3.12503	0.00204026	0.00977045	-2.05896
ENSG00000087077	TRIP6	-0.459097	0.295706	-2.6107	0.00971485	0.0336736	-3.24514
ENSG00000087086	FTL	-0.536109	9.56149	-3.46385	0.000650417	0.00390886	-0.976762
ENSG00000087087	SRRT	-0.24403	2.41157	-1.91809	0.0565131	0.129394	-4.95035
ENSG00000087088	BAX	-0.16495	2.44976	-0.979492	0.328511	0.474383	-6.28563
ENSG00000087111	PIGS	-0.0180102	0.8569	-0.122075	0.902961	0.941731	-6.59868
ENSG00000087152	ATXN7L3	0.216562	2.55574	1.70287	0.0901354	0.184055	-5.32836
ENSG00000087157	PGS1	0.0898194	4.31114	0.576534	0.564898	0.696239	-6.6302
ENSG00000087191	PSMC5	-0.16466	1.63521	-1.13628	0.257189	0.39927	-6.06748
ENSG00000087206	UIMC1	0.148105	1.92897	0.920569	0.358377	0.505952	-6.29888
ENSG00000087237	CETP	0.791951	-0.415666	3.88012	0.000141386	0.00111972	0.759869
ENSG00000087253	LPCAT2	0.791664	2.69135	4.3414	2.24033e-05	0.000253784	2.17917
ENSG00000087263	OGFOD1	-0.0152046	-0.104938	-0.0777023	0.938142	0.964195	-6.43199
ENSG00000087266	SH3BP2	0.00414916	4.92135	0.0322203	0.974328	0.986145	-6.79613
ENSG00000087274	ADD1	0.0490104	3.26906	0.40536	0.685643	0.791448	-6.70047
ENSG00000087302	RTRAF	-0.084973	1.69209	-0.55781	0.577593	0.707666	-6.55466
ENSG00000087338	GMCL1	0.187662	0.908778	1.08164	0.280706	0.425315	-6.02108
ENSG00000087365	SF3B2	-0.0650158	2.95382	-0.627338	0.531148	0.668109	-6.58023
ENSG00000087460	GNAS	-0.311608	5.00514	-2.93426	0.00373124	0.0158662	-2.61272
ENSG00000087470	DNM1L	-0.0457735	1.44532	-0.313556	0.754182	0.842985	-6.62878
ENSG00000087502	ERGIC2	-0.00637491	1.5338	-0.0328431	0.973832	0.985749	-6.68984
ENSG00000087589	CASS4	-0.40434	0.465274	-1.80149	0.0731211	0.157455	-4.97171
ENSG00000087884	AAMDC	-0.429409	0.37819	-1.73012	0.085141	0.176671	-5.09388
ENSG00000087903	RFX2	-0.314579	2.85314	-1.91819	0.0565004	0.129394	-4.96663
ENSG00000088038	CNOT3	0.0355575	1.89045	0.259217	0.795733	0.872974	-6.68372
ENSG00000088205	DDX18	-0.143217	1.17476	-1.06258	0.289246	0.433715	-6.09859
ENSG00000088247	KHSRP	-0.586874	2.51961	-3.95501	0.000105958	0.00088619	0.699675
ENSG00000088256	GNA11	-0.884951	0.447052	-3.51521	0.00054268	0.00337032	-0.680361
ENSG00000088280	ASAP3	-0.210974	0.319541	-0.788174	0.431521	0.576455	-6.22934
ENSG00000088298	EDEM2	0.268566	1.29813	1.63565	0.103474	0.203359	-5.33766
ENSG00000088367	EPB41L1	-1.91441	-0.579193	-8.13812	4.09234e-14	1.48387e-11	21.5153
ENSG00000088387	DOCK9	-0.445909	-0.145906	-1.96114	0.0512408	0.120271	-4.58938
ENSG00000088448	ANKRD10	0.258158	4.62592	1.23761	0.217299	0.352928	-6.03871
ENSG00000088682	COQ9	-0.191108	-0.110027	-0.92246	0.357392	0.505266	-6.02086
ENSG00000088727	KIF9	-0.826964	-0.712706	-4.0792	6.50729e-05	0.000595332	1.43734
ENSG00000088766	CRLS1	-0.370192	-0.066515	-1.78113	0.0763983	0.162503	-4.90435
ENSG00000088808	PPP1R13B	-0.973318	-0.101689	-4.65912	5.76397e-06	8.55815e-05	3.61563
ENSG00000088826	SMOX	-0.0948335	0.167455	-0.417221	0.676961	0.784924	-6.40769
ENSG00000088827	SIGLEC1	1.24118	1.20537	3.11034	0.00213957	0.0101405	-1.91713
ENSG00000088832	FKBP1A	0.0266191	4.6053	0.219369	0.826584	0.891813	-6.77244
ENSG00000088833	NSFL1C	0.0730334	2.42672	0.51527	0.606929	0.730243	-6.62035
ENSG00000088836	SLC4A11	-1.2467	-0.46829	-4.44999	1.41993e-05	0.000175579	2.80771
ENSG00000088930	XRN2	0.491969	1.84562	3.20279	0.00158202	0.00798226	-1.74183
ENSG00000088986	DYNLL1	-0.585811	3.13408	-2.91993	0.00389975	0.0164197	-2.64175
ENSG00000088992	TESC	0.830658	0.480888	3.12664	0.00202965	0.00973202	-1.77664
ENSG00000089006	SNX5	-0.176777	1.76535	-1.36344	0.174265	0.298083	-5.79973
ENSG00000089009	RPL6	-0.56814	4.02095	-3.58332	0.000425468	0.00273925	-0.619427
ENSG00000089022	MAPKAPK5	-0.316468	0.280915	-2.09873	0.037087	0.0940455	-4.38249
ENSG00000089041	P2RX7	0.56156	1.7012	2.59608	0.0101239	0.0348217	-3.39976
ENSG00000089053	ANAPC5	-0.0976372	1.74994	-0.757983	0.449347	0.594418	-6.42771
ENSG00000089057	SLC23A2	0.478563	0.345995	2.67613	0.00806069	0.0290445	-3.02984
ENSG00000089060	SLC8B1	-0.204682	1.967	-1.53495	0.126365	0.236041	-5.5703
ENSG00000089063	TMEM230	-0.487897	1.16221	-3.81416	0.000181652	0.00137764	0.271985
ENSG00000089094	KDM2B	-0.52822	0.634163	-3.38198	0.00086446	0.00488785	-1.11132
ENSG00000089101	CFAP61	-1.46605	-1.04236	-5.71159	3.97511e-08	1.32647e-06	8.35379
ENSG00000089127	OAS1	1.84485	3.24293	5.05384	9.69223e-07	1.95513e-05	5.17099
ENSG00000089154	GCN1	-0.76603	1.21443	-4.13249	5.26064e-05	0.000503263	1.425
ENSG00000089157	RPLP0	-0.809585	4.00904	-4.20769	3.88301e-05	0.000394065	1.62264
ENSG00000089159	PXN	-0.0272357	4.23146	-0.177316	0.859439	0.913838	-6.77892
ENSG00000089220	PEBP1	-0.981758	1.39939	-7.05248	2.75477e-11	3.08158e-09	15.2636
ENSG00000089248	ERP29	-0.165377	1.32513	-1.05744	0.291576	0.436146	-6.12242
ENSG00000089280	FUS	0.020142	3.98181	0.203968	0.838585	0.900025	-6.77205
ENSG00000089289	IGBP1	0.558625	0.558904	3.96848	0.000100556	0.000848221	0.936001
ENSG00000089327	FXYD5	-0.0933712	3.35826	-0.605923	0.545248	0.67985	-6.60277
ENSG00000089335	ZNF302	-0.644477	-0.3566	-2.86567	0.00460291	0.0186564	-2.49093
ENSG00000089351	GRAMD1A	0.487653	5.54763	2.48249	0.013864	0.0450261	-3.78299
ENSG00000089356	FXYD3	-1.03131	0.637253	-3.1963	0.00161626	0.00810765	-1.71189
ENSG00000089486	CDIP1	-0.133063	0.222712	-0.675721	0.499992	0.640209	-6.27944
ENSG00000089505	CMTM1	0.410831	1.09556	1.65498	0.0994861	0.197408	-5.25309
ENSG00000089597	GANAB	-0.491558	2.18023	-3.80696	0.000186655	0.00140369	0.184133
ENSG00000089639	GMIP	0.402199	3.7938	2.74403	0.00661695	0.02489	-3.12062
ENSG00000089692	LAG3	1.31908	-0.276707	3.76233	0.000220682	0.00159735	0.360425
ENSG00000089693	MLF2	-0.0881409	2.87162	-0.714434	0.475786	0.618874	-6.52094
ENSG00000089737	DDX24	-0.392513	1.67224	-2.68125	0.00794273	0.0286929	-3.21854
ENSG00000089775	ZBTB25	0.328496	-0.10013	1.96985	0.0502255	0.118481	-4.51845
ENSG00000089818	NECAP1	0.282289	2.44411	2.10689	0.036365	0.0925244	-4.57243
ENSG00000089820	ARHGAP4	0.381612	3.31573	2.86713	0.0045825	0.0186329	-2.78295
ENSG00000089876	DHX32	-0.463472	-0.469679	-2.15734	0.0321633	0.0844223	-4.14962
ENSG00000089902	RCOR1	-0.0592138	1.64652	-0.385002	0.700642	0.80184	-6.62587
ENSG00000089916	GPATCH2L	0.221249	2.01643	1.7272	0.0856651	0.177385	-5.25507
ENSG00000090006	LTBP4	-0.590414	0.858186	-2.4313	0.0159196	0.0499402	-3.76167
ENSG00000090013	BLVRB	-0.524287	2.06463	-3.10083	0.0022062	0.0103814	-2.09122
ENSG00000090020	SLC9A1	-0.126155	1.30092	-1.00657	0.315347	0.460711	-6.16685
ENSG00000090054	SPTLC1	-0.22855	2.09029	-1.5703	0.117914	0.224172	-5.52595
ENSG00000090060	PAPOLA	0.150786	3.68598	1.55741	0.120942	0.22847	-5.59232
ENSG00000090061	CCNK	0.445564	1.94404	3.64729	0.000337443	0.00226743	-0.333247
ENSG00000090104	RGS1	0.816008	2.27438	2.98501	0.00318674	0.0140081	-2.40149
ENSG00000090238	YPEL3	0.135483	3.60806	0.684874	0.494211	0.635362	-6.55523
ENSG00000090263	MRPS33	-0.750682	-0.479702	-3.21726	0.00150808	0.00765232	-1.46973
ENSG00000090266	NDUFB2	-0.598114	2.36466	-3.72944	0.000249428	0.001769	-0.095271
ENSG00000090273	NUDC	-0.662297	1.31835	-4.03255	7.82563e-05	0.000692416	1.04159
ENSG00000090316	MAEA	-0.156768	3.57231	-0.984328	0.326135	0.471504	-6.30933
ENSG00000090339	ICAM1	1.02846	4.92064	6.17054	3.67283e-09	1.62717e-07	10.4946
ENSG00000090372	STRN4	-0.186686	2.84688	-1.48304	0.139627	0.255102	-5.68928
ENSG00000090376	IRAK3	0.679557	4.25151	3.21808	0.00150397	0.00763934	-1.78169
ENSG00000090382	LYZ	-0.769853	6.11907	-4.3209	2.43946e-05	0.000270428	2.06797
ENSG00000090432	MUL1	0.231877	-0.201242	1.44856	0.149016	0.267295	-5.3736
ENSG00000090487	SPG21	-0.0893007	2.90743	-0.845728	0.398708	0.546564	-6.42082
ENSG00000090520	DNAJB11	-0.0670048	1.58384	-0.403245	0.687196	0.792572	-6.61012
ENSG00000090581	GNPTG	-0.190175	2.15916	-1.22685	0.221309	0.357634	-6.00151
ENSG00000090615	GOLGA3	-0.738075	1.22772	-4.5914	7.74376e-06	0.000108435	3.23061
ENSG00000090621	PABPC4	-0.616089	2.58066	-3.80197	0.000190194	0.00142162	0.150556
ENSG00000090661	CERS4	-0.594216	0.689345	-2.93671	0.00370314	0.015784	-2.44625
ENSG00000090674	MCOLN1	-0.270945	3.40379	-1.68791	0.0929764	0.187977	-5.38382
ENSG00000090686	USP48	-0.142051	1.40036	-1.04235	0.298497	0.443533	-6.14318
ENSG00000090857	PDPR	0.197981	0.509587	1.4114	0.15967	0.280376	-5.55706
ENSG00000090861	AARS1	-0.486532	0.69017	-2.73928	0.00670968	0.0251907	-2.96638
ENSG00000090863	GLG1	-0.0288075	1.95767	-0.25061	0.802371	0.877129	-6.69337
ENSG00000090905	TNRC6A	-0.213662	0.958899	-1.14252	0.254595	0.396117	-5.98615
ENSG00000090924	PLEKHG2	0.403687	3.52742	2.04664	0.041992	0.10311	-4.72581
ENSG00000090989	EXOC1	0.550232	0.989682	3.27343	0.00125042	0.00655313	-1.4367
ENSG00000091039	OSBPL8	0.248287	3.39929	1.77515	0.0773833	0.164067	-5.23149
ENSG00000091073	DTX2	-0.0375319	3.21871	-0.269772	0.787612	0.866382	-6.74574
ENSG00000091106	NLRC4	0.57834	1.56238	3.0791	0.00236571	0.0109849	-2.07538
ENSG00000091136	LAMB1	-0.671546	0.257125	-3.11632	0.00209858	0.00999923	-1.87699
ENSG00000091140	DLD	-0.393127	1.60481	-2.51448	0.0127029	0.0419298	-3.62714
ENSG00000091157	WDR7	-0.197777	0.72017	-1.0415	0.298891	0.443985	-6.05961
ENSG00000091164	TXNL1	0.122075	1.14944	0.88291	0.378337	0.526038	-6.2569
ENSG00000091317	CMTM6	0.383917	3.96327	2.78029	0.00594585	0.0229263	-3.02706
ENSG00000091409	ITGA6	-0.441187	-0.298582	-2.06762	0.0399537	0.099144	-4.34259
ENSG00000091436	MAP3K20	0.388769	1.62692	2.56097	0.0111698	0.0377465	-3.47986
ENSG00000091483	FH	-0.598553	-0.456257	-2.71351	0.00723415	0.0267316	-2.8577
ENSG00000091490	SEL1L3	-0.066266	1.51451	-0.421884	0.673559	0.783009	-6.6004
ENSG00000091527	CDV3	-0.171368	2.88654	-1.37076	0.171976	0.295451	-5.84706
ENSG00000091542	ALKBH5	-0.607101	1.01625	-4.22029	3.6889e-05	0.000376306	1.77507
ENSG00000091592	NLRP1	-0.221874	1.49639	-1.38481	0.167643	0.290064	-5.74305
ENSG00000091640	SPAG7	-0.0352451	2.17811	-0.247378	0.804867	0.878881	-6.71187
ENSG00000091651	ORC6	-0.50387	2.00331	-2.59232	0.0102314	0.0351179	-3.46816
ENSG00000092010	PSME1	0.647509	3.75797	4.31403	2.50999e-05	0.000276379	2.04248
ENSG00000092020	PPP2R3C	0.607533	2.00452	3.6154	0.000378919	0.0024917	-0.438371
ENSG00000092036	HAUS4	0.685731	1.9682	3.63863	0.000348265	0.00232586	-0.351919
ENSG00000092068	SLC7A8	-2.06456	-0.0698296	-9.58192	3.71024e-18	5.21766e-15	30.5405
ENSG00000092094	OSGEP	-0.310238	0.418746	-2.10944	0.036141	0.092169	-4.38294
ENSG00000092098	RNF31	0.601191	2.13482	4.21018	3.84384e-05	0.000390897	1.6914
ENSG00000092108	SCFD1	0.17358	1.94967	1.13014	0.259761	0.402114	-6.08838
ENSG00000092140	G2E3	0.136784	0.954154	0.580361	0.56232	0.69393	-6.44219
ENSG00000092148	HECTD1	-0.240315	1.99306	-1.80084	0.0732239	0.157555	-5.14058
ENSG00000092199	HNRNPC	0.360911	5.26924	3.45308	0.000675426	0.00402232	-1.04859
ENSG00000092201	SUPT16H	-0.266726	0.681319	-1.78266	0.0761479	0.162041	-5.03821
ENSG00000092203	TOX4	0.248268	2.19551	2.03875	0.0427811	0.104604	-4.69621
ENSG00000092208	GEMIN2	-0.188222	-0.47972	-0.714109	0.475986	0.618971	-6.11164
ENSG00000092330	TINF2	0.230411	2.37437	1.95997	0.051378	0.120506	-4.85927
ENSG00000092439	TRPM7	0.316932	1.13599	2.11181	0.0359346	0.0917713	-4.44628
ENSG00000092529	CAPN3	-0.104099	0.438607	-0.677091	0.499125	0.639431	-6.30852
ENSG00000092531	SNAP23	0.291033	3.15323	2.16136	0.031847	0.0838417	-4.48536
ENSG00000092621	PHGDH	-0.378244	-0.54302	-1.569	0.118218	0.224442	-5.18441
ENSG00000092820	EZR	-0.453185	3.78687	-2.82686	0.0051747	0.0204659	-2.90378
ENSG00000092841	MYL6	-0.221804	6.67937	-2.20731	0.0284213	0.0770105	-4.39509
ENSG00000092847	AGO1	-0.238846	-0.075398	-1.91146	0.0573652	0.130748	-4.66984
ENSG00000092871	RFFL	0.194527	2.56879	1.31499	0.190009	0.318103	-5.90325
ENSG00000092929	UNC13D	0.0821189	4.0526	0.60511	0.545787	0.680307	-6.61144
ENSG00000092931	MFSD11	0.245714	1.31095	1.8405	0.0671652	0.147551	-4.99509
ENSG00000092964	DPYSL2	-0.618636	1.54602	-3.60026	0.000400259	0.00260419	-0.487038
ENSG00000093000	NUP50	0.00808477	2.43923	0.0631689	0.949695	0.970046	-6.75341
ENSG00000093010	COMT	-0.780215	2.04363	-4.28182	2.86701e-05	0.000306105	1.9461
ENSG00000093072	ADA2	-0.0823933	2.42497	-0.500822	0.617043	0.737974	-6.62957
ENSG00000093134	VNN3	0.49254	2.94732	2.24459	0.0258817	0.071931	-4.2977
ENSG00000093144	ECHDC1	-0.276063	1.50589	-1.76618	0.0788805	0.166417	-5.16609
ENSG00000093167	LRRFIP2	0.124739	2.49687	0.91898	0.359205	0.506665	-6.33625
ENSG00000093183	SEC22C	-0.315292	0.766015	-1.87914	0.0616694	0.13816	-4.87936
ENSG00000094631	HDAC6	-0.0568213	1.93796	-0.336828	0.736597	0.830116	-6.66993
ENSG00000094755	GABRP	-0.870405	0.837815	-2.68139	0.00793959	0.0286921	-3.1614
ENSG00000094916	CBX5	-0.21988	0.0160652	-1.68577	0.0933883	0.188616	-5.08071
ENSG00000094975	SUCO	0.451081	1.13011	2.57591	0.0107134	0.0364166	-3.39527
ENSG00000095015	MAP3K1	0.683734	1.51312	4.11319	5.68315e-05	0.000534846	1.38
ENSG00000095059	DHPS	-0.375248	0.715668	-2.1668	0.0314234	0.08302	-4.31359
ENSG00000095066	HOOK2	-0.417686	1.47507	-1.94471	0.0532019	0.12378	-4.84719
ENSG00000095139	ARCN1	0.0280454	1.87764	0.233709	0.815448	0.885905	-6.69054
ENSG00000095209	TMEM38B	-0.292756	0.454553	-1.54521	0.123865	0.232474	-5.38611
ENSG00000095261	PSMD5	0.209311	0.211291	1.04852	0.295654	0.440171	-5.94379
ENSG00000095319	NUP188	-0.583014	0.920831	-3.11332	0.00211905	0.0100627	-1.97232
ENSG00000095370	SH2D3C	0.425114	2.19869	2.7938	0.00571191	0.0222158	-2.93434
ENSG00000095380	NANS	-0.13441	2.27913	-1.16855	0.243968	0.383853	-6.07441
ENSG00000095383	TBC1D2	0.380389	2.86865	1.91208	0.0572851	0.130692	-4.96907
ENSG00000095397	WHRN	0.109971	0.820785	0.49071	0.624165	0.743483	-6.47149
ENSG00000095485	CWF19L1	0.0545474	0.207209	0.32135	0.748278	0.838958	-6.42759
ENSG00000095564	BTAF1	0.201431	0.471688	1.42109	0.156835	0.276931	-5.53429
ENSG00000095787	WAC	0.623722	3.67135	4.7258	4.29642e-06	6.67098e-05	3.71783
ENSG00000095794	CREM	0.827028	4.52219	5.60468	6.80265e-08	2.08614e-06	7.68067
ENSG00000095906	NUBP2	-0.445397	0.231099	-2.63279	0.0091252	0.0320244	-3.17722
ENSG00000095951	HIVEP1	0.776365	3.22905	5.29172	3.15025e-07	7.50872e-06	6.22368
ENSG00000096060	FKBP5	0.174773	2.67713	0.664866	0.506896	0.646107	-6.5397
ENSG00000096063	SRPK1	0.43657	3.06358	2.47938	0.0139819	0.0452906	-3.76803
ENSG00000096070	BRPF3	-0.0229134	0.875771	-0.150259	0.880711	0.92754	-6.5992
ENSG00000096080	MRPS18A	0.0445748	-0.132038	0.228109	0.819793	0.888452	-6.40455
ENSG00000096093	EFHC1	-0.591801	2.26049	-2.31751	0.0214803	0.0625043	-4.13116
ENSG00000096384	HSP90AB1	-0.627378	3.94718	-3.38896	0.000843915	0.00479094	-1.25249
ENSG00000096696	DSP	-1.05777	-0.484838	-4.75297	3.80847e-06	6.06643e-05	4.04607
ENSG00000096717	SIRT1	0.575131	0.647018	3.36299	0.000922727	0.00513473	-1.11849
ENSG00000096746	HNRNPH3	0.229489	2.76881	1.59882	0.111428	0.21491	-5.50386
ENSG00000096872	IFT74	-0.00151671	-0.506821	-0.006541	0.994788	0.997195	-6.33521
ENSG00000096968	JAK2	0.982579	2.31548	5.85413	1.92185e-08	6.98107e-07	8.94129
ENSG00000096996	IL12RB1	0.257799	0.379351	1.4925	0.137132	0.252088	-5.41836
ENSG00000097033	SH3GLB1	0.836579	3.26907	4.69229	4.98212e-06	7.59633e-05	3.58716
ENSG00000099139	PCSK5	-1.42396	3.35076	-2.18684	0.0299056	0.0797807	-4.4459
ENSG00000099194	SCD	-2.91013	0.491743	-10.2402	4.42692e-20	8.71573e-17	34.8998
ENSG00000099203	TMED1	0.175492	0.586791	0.9996	0.318703	0.464306	-6.05883
ENSG00000099204	ABLIM1	-0.60834	0.165164	-2.79554	0.00568255	0.0221453	-2.75084
ENSG00000099246	RAB18	0.233598	2.33298	1.5698	0.118032	0.22422	-5.52983
ENSG00000099250	NRP1	-1.26524	0.913537	-5.69709	4.27721e-08	1.40349e-06	8.20139
ENSG00000099282	TSPAN15	-1.59045	-0.619322	-6.55333	4.61079e-10	2.9283e-08	12.5837
ENSG00000099290	WASHC2A	0.653946	1.83385	3.76795	0.000216092	0.00157074	0.0955845
ENSG00000099308	MAST3	-0.0835575	2.81087	-0.502252	0.616039	0.73721	-6.64632
ENSG00000099326	MZF1	-0.496043	-0.258495	-2.95679	0.00347983	0.0150112	-2.23713
ENSG00000099330	OCEL1	-0.481143	-0.272852	-2.19751	0.0291239	0.0782039	-4.09542
ENSG00000099331	MYO9B	-0.27607	4.51131	-2.24793	0.0256642	0.0714677	-4.31973
ENSG00000099337	KCNK6	0.212784	1.25838	0.952166	0.342154	0.488851	-6.19843
ENSG00000099338	CATSPERG	-0.174312	-0.221456	-0.771352	0.441402	0.586313	-6.13873
ENSG00000099341	PSMD8	-0.350981	2.5164	-2.63695	0.00901783	0.0317495	-3.37473
ENSG00000099364	FBXL19	0.110016	0.0405364	0.65702	0.511918	0.650823	-6.23585
ENSG00000099377	HSD3B7	0.0128482	0.847031	0.0673566	0.946365	0.96851	-6.61068
ENSG00000099622	CIRBP	-0.304864	3.05253	-2.04531	0.0421238	0.103382	-4.72727
ENSG00000099624	ATP5F1D	-0.407739	1.46113	-2.21454	0.0279128	0.0760275	-4.29938
ENSG00000099725	PRKY	0.115498	-0.703377	0.496033	0.620412	0.740714	-6.21059
ENSG00000099783	HNRNPM	0.0289334	3.82863	0.262031	0.793565	0.871275	-6.75675
ENSG00000099785	MARCHF2	-0.0967679	2.22346	-0.661941	0.508765	0.647651	-6.52623
ENSG00000099795	NDUFB7	-0.889237	1.36489	-3.85299	0.000156799	0.00122211	0.388511
ENSG00000099797	TECR	-0.738612	2.01199	-4.42712	1.56418e-05	0.000189628	2.51673
ENSG00000099800	TIMM13	-0.147495	-0.285814	-0.633502	0.527125	0.663929	-6.20373
ENSG00000099804	CDC34	-0.10186	1.62258	-0.661283	0.509186	0.647963	-6.48743
ENSG00000099810	MTAP	-0.292232	0.341034	-1.47964	0.140532	0.256236	-5.46243
ENSG00000099812	MISP	-0.612771	-0.540255	-2.45127	0.0150875	0.0478793	-3.49165
ENSG00000099817	POLR2E	-0.823377	2.11957	-5.22625	4.30758e-07	9.88435e-06	5.93446
ENSG00000099821	POLRMT	-0.47498	-0.188075	-2.38214	0.0181429	0.0550049	-3.70848
ENSG00000099860	GADD45B	0.277063	5.11759	1.74445	0.082606	0.172722	-5.29728
ENSG00000099875	MKNK2	-0.638738	3.70597	-3.35278	0.00095556	0.00525798	-1.36612
ENSG00000099899	TRMT2A	-0.305184	1.09389	-1.62528	0.105667	0.206427	-5.35609
ENSG00000099901	RANBP1	-0.254942	1.15796	-1.39747	0.163809	0.285657	-5.69802
ENSG00000099904	ZDHHC8	-1.20477	-0.037227	-6.20096	3.12336e-09	1.41038e-07	10.7535
ENSG00000099910	KLHL22	-0.0959454	0.675074	-0.585213	0.55906	0.690512	-6.41278
ENSG00000099917	MED15	-0.0462719	3.27969	-0.437145	0.662475	0.774318	-6.68852
ENSG00000099940	SNAP29	0.108785	0.877026	0.865324	0.38789	0.53599	-6.22289
ENSG00000099942	CRKL	0.0949796	1.21392	0.718596	0.473222	0.616749	-6.39391
ENSG00000099949	LZTR1	-0.336058	0.934091	-2.0768	0.0390885	0.0976617	-4.52299
ENSG00000099956	SMARCB1	-0.223591	1.81837	-1.92343	0.055836	0.128451	-4.90577
ENSG00000099968	BCL2L13	0.265408	1.29988	1.70836	0.0891102	0.182669	-5.21821
ENSG00000099977	DDT	0.247439	1.10365	1.26651	0.206793	0.339109	-5.84288
ENSG00000099985	OSM	0.311921	4.97964	1.17446	0.241599	0.381524	-6.11435
ENSG00000099991	CABIN1	-0.219414	1.24761	-1.33727	0.182641	0.308867	-5.78981
ENSG00000099992	TBC1D10A	-0.586924	0.34963	-3.54199	0.000493369	0.00310532	-0.57144
ENSG00000099995	SF3A1	-0.253927	3.24873	-1.89485	0.0595444	0.134347	-5.01922
ENSG00000099998	GGT5	0.706277	0.217497	2.86496	0.00461278	0.0186788	-2.49656
ENSG00000100014	SPECC1L	0.620149	1.02374	3.40711	0.000792609	0.0045575	-1.02389
ENSG00000100023	PPIL2	-0.58684	0.503821	-3.18727	0.00166503	0.00828642	-1.69033
ENSG00000100024	UPB1	0.7773	1.28488	2.66129	0.00841187	0.0299698	-3.17931
ENSG00000100028	SNRPD3	-0.209113	0.844871	-1.03594	0.301473	0.44627	-6.08448
ENSG00000100029	PES1	-0.281948	0.908022	-1.79017	0.0749285	0.160312	-5.05251
ENSG00000100030	MAPK1	0.00911226	2.96393	0.0633655	0.949538	0.970046	-6.77206
ENSG00000100031	GGT1	0.063974	1.71183	0.311465	0.755769	0.84428	-6.65563
ENSG00000100034	PPM1F	-0.217924	1.94128	-1.29778	0.195847	0.325223	-5.89864
ENSG00000100055	CYTH4	0.227556	5.07277	1.40081	0.16281	0.284319	-5.82745
ENSG00000100060	MFNG	-0.483561	0.769511	-2.26447	0.0246099	0.0692171	-4.12771
ENSG00000100075	SLC25A1	-0.81679	0.504994	-4.59896	7.49393e-06	0.00010593	3.31861
ENSG00000100077	GRK3	-0.0559684	0.368736	-0.321083	0.74848	0.838993	-6.4778
ENSG00000100083	GGA1	-0.0311785	3.19287	-0.227607	0.820182	0.888704	-6.75579
ENSG00000100084	HIRA	0.106127	-0.060233	0.550697	0.582451	0.710842	-6.27678
ENSG00000100092	SH3BP1	0.176578	2.04918	1.19901	0.231932	0.370398	-6.01822
ENSG00000100097	LGALS1	-0.481327	5.3669	-2.37511	0.0184824	0.0558614	-4.03351
ENSG00000100099	HPS4	-0.0533859	0.334086	-0.359582	0.719537	0.817107	-6.45318
ENSG00000100100	PIK3IP1	0.505215	1.81691	2.93984	0.00366749	0.0156832	-2.5038
ENSG00000100106	TRIOBP	-0.0260256	1.88882	-0.24521	0.806543	0.880223	-6.69028
ENSG00000100109	TFIP11	0.127814	1.85693	0.977039	0.329722	0.47599	-6.24266
ENSG00000100121	GGTLC2	0.362726	0.712114	1.21037	0.227553	0.365302	-5.82386
ENSG00000100124	ANKRD54	-0.419722	0.000299097	-2.30284	0.0223087	0.064363	-3.91196
ENSG00000100129	EIF3L	-0.470475	2.17981	-2.89217	0.00424621	0.0175703	-2.68995
ENSG00000100138	SNU13	-0.466363	1.20973	-2.57603	0.0107098	0.0364166	-3.44164
ENSG00000100139	MICALL1	-0.296368	0.960854	-2.00788	0.0459919	0.110695	-4.66346
ENSG00000100142	POLR2F	-0.230942	1.52012	-1.38945	0.166229	0.288541	-5.74456
ENSG00000100150	DEPDC5	0.0282152	1.20734	0.159688	0.873287	0.923178	-6.63662
ENSG00000100151	PICK1	-0.579804	-0.110693	-2.79044	0.00576938	0.0224127	-2.71706
ENSG00000100162	CENPM	-0.808063	-0.384585	-2.79005	0.00577608	0.0224233	-2.68593
ENSG00000100201	DDX17	-0.105262	4.61933	-1.09942	0.272898	0.41682	-6.19838
ENSG00000100207	TCF20	0.156976	0.540408	1.0386	0.300234	0.445105	-6.01843
ENSG00000100211	CBY1	-0.773744	-0.283377	-3.41532	0.000770378	0.00445832	-0.890847
ENSG00000100216	TOMM22	-0.400772	0.0782095	-2.68644	0.00782468	0.0283635	-3.00759
ENSG00000100219	XBP1	-0.0960026	3.53037	-0.560115	0.576023	0.706358	-6.63217
ENSG00000100220	RTCB	0.34414	1.05095	1.54382	0.124202	0.232919	-5.43531
ENSG00000100221	JOSD1	-0.14877	3.09371	-0.829956	0.407546	0.554664	-6.4392
ENSG00000100225	FBXO7	0.128782	1.45134	0.861148	0.39018	0.538398	-6.30833
ENSG00000100226	GTPBP1	0.552814	5.06843	3.12222	0.00205894	0.00983414	-2.07283
ENSG00000100227	POLDIP3	0.110011	1.33312	0.763032	0.446337	0.591351	-6.37645
ENSG00000100239	PPP6R2	-0.119919	1.47931	-1.07434	0.283957	0.428789	-6.11709
ENSG00000100241	SBF1	-0.303638	1.62615	-2.41288	0.0167225	0.0517498	-3.86739
ENSG00000100242	SUN2	0.298984	5.07258	2.07144	0.0395916	0.0986683	-4.68953
ENSG00000100243	CYB5R3	-0.551783	2.45162	-4.59377	7.66468e-06	0.000107672	3.18187
ENSG00000100258	LMF2	0.164026	1.44316	1.18668	0.236751	0.376504	-5.97658
ENSG00000100263	RHBDD3	-0.282983	-0.387924	-1.41212	0.159458	0.280105	-5.4101
ENSG00000100266	PACSIN2	0.0373373	3.9029	0.31442	0.753527	0.84262	-6.74274
ENSG00000100280	AP1B1	-0.144877	1.89495	-1.11413	0.266551	0.409454	-6.11033
ENSG00000100281	HMGXB4	0.178355	0.316993	1.29545	0.196646	0.326275	-5.67379
ENSG00000100284	TOM1	0.403112	5.30217	2.86637	0.00459311	0.0186411	-2.80014
ENSG00000100288	CHKB	0.0454574	2.04626	0.332522	0.739841	0.832152	-6.67438
ENSG00000100292	HMOX1	-0.744687	4.16575	-3.20349	0.00157837	0.00796792	-1.8294
ENSG00000100296	THOC5	0.335008	1.7128	2.19803	0.0290862	0.0781936	-4.32658
ENSG00000100297	MCM5	-0.139671	0.796661	-0.70921	0.479014	0.621732	-6.35721
ENSG00000100299	ARSA	-0.338558	1.36384	-2.47494	0.0141514	0.0457191	-3.7013
ENSG00000100300	TSPO	-0.43567	4.42102	-2.22899	0.0269191	0.0740086	-4.3605
ENSG00000100304	TTLL12	-0.357149	-0.169302	-2.5096	0.012874	0.042371	-3.39407
ENSG00000100307	CBX7	-0.361807	-0.424375	-1.98014	0.0490489	0.116318	-4.49667
ENSG00000100316	RPL3	-0.681883	4.54516	-3.94765	0.000109024	0.000900689	0.650439
ENSG00000100319	ZMAT5	0.289919	-0.228843	1.72237	0.0865374	0.17874	-4.94715
ENSG00000100325	ASCC2	-0.0471215	2.08682	-0.290761	0.771533	0.855192	-6.69475
ENSG00000100330	MTMR3	0.331251	3.11106	2.34803	0.0198424	0.0587682	-4.07672
ENSG00000100335	MIEF1	-0.51834	-0.142137	-2.92033	0.003895	0.0164137	-2.36607
ENSG00000100336	APOL4	0.756333	0.260762	2.86617	0.00459589	0.0186411	-2.51259
ENSG00000100342	APOL1	1.08637	2.3412	4.24603	3.3209e-05	0.00034667	1.83388
ENSG00000100345	MYH9	-0.183608	5.76377	-1.95661	0.0517747	0.121292	-4.91074
ENSG00000100348	TXN2	0.00628516	1.03411	0.0450103	0.964144	0.979669	-6.63348
ENSG00000100353	EIF3D	-0.118179	2.45152	-1.08111	0.28094	0.425539	-6.18059
ENSG00000100354	TNRC6B	0.163887	1.8149	1.03962	0.299761	0.44474	-6.17549
ENSG00000100359	SGSM3	-0.231962	1.16595	-1.20233	0.230647	0.369064	-5.94629
ENSG00000100360	IFT27	-1.03579	-0.587125	-4.58378	8.00382e-06	0.000111199	3.35834
ENSG00000100364	KIAA0930	-0.334511	2.49588	-2.15309	0.0325001	0.0850429	-4.48924
ENSG00000100365	NCF4	0.476911	4.04025	3.19372	0.00163003	0.00815348	-1.85448
ENSG00000100368	CSF2RB	0.923379	5.10973	6.13364	4.46747e-09	1.8956e-07	10.3047
ENSG00000100376	FAM118A	-0.00605725	1.0293	-0.0306092	0.975612	0.986535	-6.63085
ENSG00000100379	KCTD17	-0.356518	-0.11194	-1.76045	0.0798482	0.168062	-4.93968
ENSG00000100380	ST13	-0.389677	2.70891	-2.87977	0.00440982	0.0181103	-2.74292
ENSG00000100385	IL2RB	0.85964	0.254184	2.79332	0.00572008	0.0222387	-2.68026
ENSG00000100387	RBX1	-0.090209	0.591009	-0.456144	0.648777	0.763578	-6.46565
ENSG00000100393	EP300	0.425164	3.34612	3.01852	0.0028683	0.0128929	-2.35925
ENSG00000100401	RANGAP1	-0.124426	0.699198	-0.769766	0.44234	0.5874	-6.30574
ENSG00000100410	PHF5A	-0.156289	0.533731	-0.891089	0.373945	0.521699	-6.16286
ENSG00000100412	ACO2	-0.691449	1.31717	-4.72971	4.22278e-06	6.56902e-05	3.80131
ENSG00000100413	POLR3H	-0.595458	-0.378834	-3.14131	0.00193521	0.0093751	-1.70813
ENSG00000100416	TRMU	-0.398972	0.388889	-2.38512	0.0180004	0.0547251	-3.79128
ENSG00000100418	DESI1	0.0155413	0.692547	0.0889548	0.929206	0.959017	-6.5802
ENSG00000100422	CERK	-0.0429251	1.41756	-0.249009	0.803608	0.877993	-6.64607
ENSG00000100425	BRD1	0.0373055	0.920377	0.253854	0.799867	0.875607	-6.58092
ENSG00000100429	HDAC10	-0.400969	0.888319	-2.86874	0.00456019	0.0185805	-2.65123
ENSG00000100439	ABHD4	-0.170551	0.661266	-0.804253	0.422199	0.568087	-6.27529
ENSG00000100441	KHNYN	0.00705239	1.57201	0.0566582	0.954874	0.972659	-6.69038
ENSG00000100445	SDR39U1	-0.0392816	-0.349722	-0.158689	0.874073	0.923564	-6.3778
ENSG00000100453	GZMB	2.85015	1.52165	6.11995	4.80336e-09	2.0207e-07	10.3517
ENSG00000100461	RBM23	0.156676	3.69334	1.09318	0.27562	0.419546	-6.1975
ENSG00000100462	PRMT5	-0.0499189	1.33053	-0.271948	0.785941	0.864833	-6.63184
ENSG00000100478	AP4S1	-0.331045	0.455416	-1.96301	0.0510217	0.119813	-4.67806
ENSG00000100485	SOS2	0.416923	1.84063	2.79873	0.00562877	0.0219618	-2.89393
ENSG00000100490	CDKL1	-0.854361	0.580918	-2.37885	0.0183012	0.0553988	-3.86068
ENSG00000100503	NIN	0.215073	3.20651	1.68853	0.0928576	0.187891	-5.37417
ENSG00000100504	PYGL	0.0797651	3.70795	0.415988	0.677861	0.785533	-6.70291
ENSG00000100519	PSMC6	0.146191	1.99744	1.17441	0.241616	0.381524	-6.04186
ENSG00000100523	DDHD1	-0.00173744	0.22968	-0.00945937	0.992462	0.996003	-6.50955
ENSG00000100528	CNIH1	-0.0283002	0.965202	-0.149813	0.881062	0.927612	-6.61166
ENSG00000100554	ATP6V1D	0.111724	2.70601	0.890336	0.374348	0.521966	-6.37292
ENSG00000100564	PIGH	0.0390757	0.995765	0.258424	0.796344	0.873157	-6.58481
ENSG00000100567	PSMA3	0.398963	2.9152	2.99922	0.00304789	0.0135212	-2.40302
ENSG00000100568	VTI1B	-0.324833	0.922486	-2.12417	0.0348751	0.0898482	-4.42818
ENSG00000100578	KIAA0586	-0.0344155	0.168342	-0.173862	0.862148	0.915829	-6.45222
ENSG00000100591	AHSA1	-0.434724	2.48883	-2.47276	0.0142356	0.0458972	-3.7783
ENSG00000100592	DAAM1	-0.720527	-0.0404017	-3.46421	0.000649597	0.0039087	-0.771948
ENSG00000100596	SPTLC2	0.81949	2.28615	4.14184	5.06693e-05	0.000487098	1.43259
ENSG00000100599	AL159141.1	-0.0250157	3.166	-0.182728	0.855195	0.911098	-6.76348
ENSG00000100600	LGMN	0.434275	3.05104	1.94227	0.053499	0.124231	-4.9168
ENSG00000100603	SNW1	0.140416	1.74779	1.03045	0.304033	0.448778	-6.17926
ENSG00000100605	ITPK1	0.0715033	2.65507	0.515703	0.606627	0.730243	-6.63088
ENSG00000100612	DHRS7	0.232264	2.60003	1.60549	0.109951	0.212896	-5.48772
ENSG00000100614	PPM1A	0.265132	2.04134	1.83754	0.0676037	0.148249	-5.06544
ENSG00000100632	ERH	-0.00697265	1.91184	-0.0356865	0.971568	0.984266	-6.71779
ENSG00000100644	HIF1A	0.606655	5.81542	3.81296	0.000182477	0.00138283	0.170306
ENSG00000100647	SUSD6	0.632377	4.02983	4.32101	2.4384e-05	0.000270428	2.06633
ENSG00000100650	SRSF5	0.069149	4.01689	0.517973	0.605045	0.728838	-6.65956
ENSG00000100664	EIF5	-0.0602892	3.97164	-0.526024	0.59945	0.724477	-6.6559
ENSG00000100697	DICER1	0.331148	2.64395	2.40807	0.016938	0.0523346	-3.92194
ENSG00000100711	ZFYVE21	-0.85173	-0.0953333	-4.18206	4.30834e-05	0.000430134	1.74091
ENSG00000100714	MTHFD1	-0.600998	0.362596	-2.88666	0.00431818	0.0178381	-2.54225
ENSG00000100722	ZC3H14	-0.0146066	0.847295	-0.0782685	0.937692	0.964136	-6.60512
ENSG00000100726	TELO2	-0.48102	0.0595113	-2.7537	0.00643157	0.0243416	-2.84342
ENSG00000100731	PCNX1	0.187858	4.09589	1.37044	0.172076	0.295519	-5.8653
ENSG00000100744	GSKIP	0.331146	0.0660435	1.5905	0.113289	0.217519	-5.20456
ENSG00000100749	VRK1	0.34714	0.602311	1.6965	0.0913349	0.185801	-5.12855
ENSG00000100764	PSMC1	-0.14618	2.57926	-1.17758	0.240352	0.380268	-6.07865
ENSG00000100767	PAPLN	0.0406332	-0.225042	0.212347	0.832051	0.895632	-6.36684
ENSG00000100796	PPP4R3A	0.147781	2.13258	1.20872	0.228186	0.36602	-6.01002
ENSG00000100802	C14orf93	0.480347	-0.210732	1.94972	0.0525976	0.122795	-4.51031
ENSG00000100804	PSMB5	-0.135414	0.608088	-0.721784	0.471264	0.614861	-6.32178
ENSG00000100811	YY1	-0.0271606	1.68561	-0.207587	0.835761	0.897994	-6.68495
ENSG00000100813	ACIN1	0.097643	3.42137	0.889454	0.37482	0.52255	-6.39292
ENSG00000100815	TRIP11	0.597009	0.250725	3.64937	0.000334886	0.00225333	-0.133429
ENSG00000100823	APEX1	-0.716228	0.640257	-3.44743	0.000688904	0.00408774	-0.912938
ENSG00000100836	PABPN1	0.0426668	2.24716	0.362163	0.71761	0.815628	-6.67919
ENSG00000100852	ARHGAP5	-0.289486	0.0346087	-1.54757	0.123296	0.231715	-5.30733
ENSG00000100865	CINP	-0.17635	0.612517	-1.1724	0.242422	0.38228	-5.89792
ENSG00000100883	SRP54	0.584515	1.98525	4.01225	8.47539e-05	0.00073703	0.957873
ENSG00000100888	CHD8	0.176981	2.00707	1.8935	0.059725	0.134631	-4.96311
ENSG00000100889	PCK2	0.090138	0.709188	0.488051	0.626044	0.745287	-6.45999
ENSG00000100890	PRORP	-0.0285258	0.157143	-0.159483	0.873448	0.923249	-6.46271
ENSG00000100897	DCAF11	0.211542	1.99787	1.9311	0.0548737	0.126713	-4.89214
ENSG00000100902	PSMA6	0.155295	3.6589	1.14519	0.253489	0.395083	-6.13933
ENSG00000100906	NFKBIA	0.909044	7.87632	5.16399	5.78612e-07	1.26575e-05	5.63719
ENSG00000100908	EMC9	0.25152	-0.6208	1.07495	0.283681	0.428569	-5.72763
ENSG00000100911	PSME2	0.494299	3.43374	2.67705	0.0080394	0.0289996	-3.28729
ENSG00000100918	REC8	0.787153	2.67882	4.89982	1.96762e-06	3.55399e-05	4.48963
ENSG00000100926	TM9SF1	-0.22548	1.34352	-1.6472	0.101076	0.199797	-5.33882
ENSG00000100934	SEC23A	-0.555293	1.60439	-3.87699	0.000143087	0.00113136	0.463421
ENSG00000100938	GMPR2	0.330627	3.11416	2.45756	0.0148336	0.0472744	-3.82312
ENSG00000100941	PNN	0.052282	1.47084	0.324157	0.746156	0.837341	-6.62714
ENSG00000100949	RABGGTA	0.0960707	0.974293	0.652544	0.514794	0.653298	-6.4126
ENSG00000100979	PLTP	-0.365114	0.791101	-1.46836	0.143566	0.260318	-5.56216
ENSG00000100982	PCIF1	0.107331	1.0494	0.84385	0.399754	0.547389	-6.27212
ENSG00000100983	GSS	-0.75814	0.857533	-4.83596	2.62685e-06	4.48158e-05	4.27927
ENSG00000100985	MMP9	0.868928	3.38675	2.76455	0.00622904	0.0237393	-3.05216
ENSG00000100991	TRPC4AP	0.24572	2.06459	1.88868	0.0603708	0.135714	-4.97323
ENSG00000100994	PYGB	-0.371506	0.321867	-2.11178	0.0359378	0.0917713	-4.36195
ENSG00000100997	ABHD12	-0.471585	1.66001	-2.48238	0.0138683	0.0450261	-3.71159
ENSG00000101000	PROCR	-0.351974	-0.0857221	-1.25542	0.210782	0.344239	-5.69526
ENSG00000101017	CD40	0.323269	1.19514	1.6482	0.10087	0.199552	-5.30397
ENSG00000101019	UQCC1	-0.3619	0.111616	-1.88831	0.060422	0.135785	-4.76945
ENSG00000101040	ZMYND8	0.105795	0.326055	0.563891	0.573456	0.704317	-6.35449
ENSG00000101052	IFT52	0.550805	-0.427513	2.24125	0.026101	0.0723972	-3.91135
ENSG00000101084	RAB5IF	0.390969	3.65026	2.58374	0.0104809	0.0358492	-3.52776
ENSG00000101104	PABPC1L	-0.12162	1.21764	-0.828158	0.408561	0.555201	-6.31662
ENSG00000101109	STK4	0.380329	3.36106	2.86039	0.00467714	0.0188773	-2.80233
ENSG00000101126	ADNP	0.249534	0.721157	1.51872	0.130401	0.2417	-5.4335
ENSG00000101138	CSTF1	-0.0887264	0.419584	-0.525119	0.600078	0.724806	-6.39127
ENSG00000101146	RAE1	0.378597	-0.0515604	2.21413	0.027941	0.0760651	-4.03627
ENSG00000101150	TPD52L2	0.157861	3.5678	1.20756	0.228634	0.366559	-6.06587
ENSG00000101152	DNAJC5	0.147057	2.53767	1.07452	0.283875	0.42873	-6.18517
ENSG00000101158	NELFCD	-0.148276	1.40853	-1.40494	0.161578	0.282718	-5.70923
ENSG00000101160	CTSZ	-0.491531	4.93501	-2.54949	0.0115321	0.0387977	-3.62129
ENSG00000101161	PRPF6	-0.117218	0.836022	-0.951951	0.342263	0.488932	-6.16221
ENSG00000101166	PRELID3B	-0.0533527	1.11604	-0.342502	0.73233	0.826563	-6.58342
ENSG00000101181	MTG2	-0.144883	1.07694	-1.01757	0.310103	0.455076	-6.13685
ENSG00000101182	PSMA7	-0.337876	3.55821	-2.23077	0.026799	0.0737945	-4.35067
ENSG00000101187	SLCO4A1	0.991315	2.45479	3.93922	0.000112641	0.00092403	0.679169
ENSG00000101191	DIDO1	0.0457833	0.799766	0.406053	0.685134	0.791067	-6.51187
ENSG00000101193	GID8	-0.219529	-0.00489159	-1.16052	0.24721	0.387752	-5.8171
ENSG00000101199	ARFGAP1	-0.262075	1.81199	-1.99193	0.0477297	0.113903	-4.77622
ENSG00000101224	CDC25B	0.409199	-0.313365	1.93297	0.054642	0.126267	-4.54816
ENSG00000101236	RNF24	0.790783	2.62558	4.33076	2.3417e-05	0.000262249	2.14128
ENSG00000101246	ARFRP1	0.129422	1.10125	0.805705	0.421363	0.567348	-6.31094
ENSG00000101255	TRIB3	0.265729	0.611337	1.20897	0.228091	0.366002	-5.82729
ENSG00000101265	RASSF2	0.71495	3.53614	3.79641	0.000194218	0.00144511	0.123812
ENSG00000101266	CSNK2A1	-0.44435	1.64095	-3.39546	0.000825204	0.00469827	-1.16596
ENSG00000101290	CDS2	0.660247	1.94031	4.52023	1.05254e-05	0.000137912	2.92914
ENSG00000101294	HM13	0.412303	3.89872	3.01434	0.00290635	0.0130283	-2.3803
ENSG00000101307	SIRPB1	0.120242	3.85453	0.634565	0.526432	0.663384	-6.59129
ENSG00000101310	SEC23B	-0.14644	1.80865	-1.08677	0.278437	0.422526	-6.13466
ENSG00000101336	HCK	0.574372	5.3175	4.41997	1.61208e-05	0.000194477	2.45288
ENSG00000101337	TM9SF4	0.136695	2.02914	0.944639	0.345975	0.492805	-6.28599
ENSG00000101342	TLDC2	1.3173	-0.440096	3.96069	0.000103648	0.000871317	1.07175
ENSG00000101343	CRNKL1	0.544955	0.0178818	2.99901	0.00304989	0.0135239	-2.09175
ENSG00000101347	SAMHD1	0.296432	4.18285	1.53123	0.127282	0.237348	-5.63595
ENSG00000101350	KIF3B	0.0726312	0.249612	0.558725	0.57697	0.707133	-6.34104
ENSG00000101361	NOP56	0.00537461	1.5724	0.0303645	0.975806	0.986535	-6.69271
ENSG00000101363	MANBAL	-0.042964	-0.0181692	-0.270407	0.787124	0.865942	-6.41064
ENSG00000101365	IDH3B	0.0809114	0.92057	0.507649	0.612255	0.733841	-6.4863
ENSG00000101367	MAPRE1	-0.0403482	2.86455	-0.308921	0.757701	0.845766	-6.7249
ENSG00000101384	JAG1	0.335783	0.593636	2.05522	0.041148	0.101519	-4.48684
ENSG00000101413	RPRD1B	-0.0621848	1.03192	-0.417688	0.67662	0.784714	-6.54648
ENSG00000101421	CHMP4B	0.413201	3.84407	3.10355	0.00218696	0.0103106	-2.12126
ENSG00000101425	BPI	0.0866197	-0.24848	0.33426	0.738531	0.831249	-6.33753
ENSG00000101439	CST3	-0.577896	4.86999	-2.71238	0.0072579	0.0267993	-3.21016
ENSG00000101443	WFDC2	-0.886409	2.87024	-1.94967	0.0526032	0.122795	-4.91214
ENSG00000101444	AHCY	-0.538858	0.293095	-3.3537	0.00095258	0.00524745	-1.16561
ENSG00000101445	PPP1R16B	0.522574	-0.746283	1.91646	0.0567224	0.129825	-4.47403
ENSG00000101457	DNTTIP1	0.271319	2.15664	1.68482	0.0935718	0.18889	-5.33403
ENSG00000101460	MAP1LC3A	-0.0672163	1.66638	-0.303	0.762203	0.848798	-6.65578
ENSG00000101473	ACOT8	0.141412	-0.139368	0.7886	0.431273	0.576279	-6.12228
ENSG00000101474	APMAP	0.0204769	2.2294	0.113303	0.909903	0.946238	-6.73441
ENSG00000101493	ZNF516	0.0805957	1.89885	0.487095	0.626721	0.745732	-6.59767
ENSG00000101544	ADNP2	0.206994	1.16337	0.871187	0.384689	0.532613	-6.25414
ENSG00000101557	USP14	-0.196238	0.335825	-1.25231	0.211908	0.345769	-5.76055
ENSG00000101558	VAPA	-0.318184	4.00975	-2.52233	0.0124314	0.0413103	-3.68597
ENSG00000101577	LPIN2	0.123559	2.10982	0.729753	0.466389	0.609955	-6.46949
ENSG00000101596	SMCHD1	0.965756	4.75595	5.34776	2.40477e-07	5.99888e-06	6.4669
ENSG00000101608	MYL12A	0.598471	5.63601	5.0952	7.99289e-07	1.64952e-05	5.31529
ENSG00000101654	RNMT	0.29773	0.61273	1.62721	0.105255	0.205746	-5.25301
ENSG00000101665	SMAD7	-0.11384	0.808535	-0.713998	0.476055	0.618978	-6.3527
ENSG00000101745	ANKRD12	0.5841	3.54385	4.11981	5.53467e-05	0.000525393	1.29896
ENSG00000101751	POLI	0.231883	0.24256	1.1153	0.266053	0.408839	-5.86912
ENSG00000101773	RBBP8	0.226101	0.456803	1.11413	0.266551	0.409454	-5.90394
ENSG00000101782	RIOK3	-0.110879	2.49528	-0.8701	0.385281	0.533058	-6.38451
ENSG00000101843	PSMD10	-0.335301	0.68847	-1.83261	0.0683362	0.149423	-4.95766
ENSG00000101849	TBL1X	0.0105196	1.97493	0.0712508	0.943269	0.967008	-6.72524
ENSG00000101856	PGRMC1	-0.306801	-0.114225	-1.58377	0.114815	0.219829	-5.22273
ENSG00000101882	NKAP	0.110497	0.303487	0.66332	0.507884	0.646981	-6.27348
ENSG00000101901	ALG13	0.316371	1.54004	1.42171	0.156655	0.276712	-5.67641
ENSG00000101911	PRPS2	0.106278	0.0690982	0.513551	0.608129	0.730625	-6.32925
ENSG00000101916	TLR8	1.2662	2.16583	5.45872	1.40086e-07	3.86783e-06	7.05327
ENSG00000101940	WDR13	-0.409262	2.00606	-2.67298	0.00813415	0.0292449	-3.25985
ENSG00000101966	XIAP	0.609764	2.04241	3.42162	0.000753724	0.00438514	-1.07506
ENSG00000101972	STAG2	0.320204	3.18496	2.16965	0.0312038	0.0825283	-4.46847
ENSG00000101974	ATP11C	0.711274	0.202375	3.6312	0.0003578	0.00237825	-0.169688
ENSG00000101986	ABCD1	0.522377	0.978734	3.12907	0.00201368	0.0096649	-1.87485
ENSG00000102007	PLP2	0.357529	3.67861	2.03571	0.0430885	0.105152	-4.75074
ENSG00000102030	NAA10	0.0599428	1.71164	0.412582	0.680352	0.787464	-6.61765
ENSG00000102032	RENBP	0.423017	2.89947	2.49727	0.0133164	0.043652	-3.72036
ENSG00000102034	ELF4	0.723982	2.29735	5.07112	8.94354e-07	1.82656e-05	5.25429
ENSG00000102054	RBBP7	0.0978593	0.79552	0.614857	0.539343	0.675483	-6.40305
ENSG00000102081	FMR1	0.427471	2.87429	2.86525	0.00460869	0.01867	-2.77511
ENSG00000102096	PIM2	0.972321	2.96665	4.60752	7.22038e-06	0.000102862	3.24613
ENSG00000102100	SLC35A2	0.190047	0.754842	0.965993	0.335206	0.481296	-6.11991
ENSG00000102103	PQBP1	0.151976	1.26341	0.906461	0.365775	0.513442	-6.24925
ENSG00000102119	EMD	-0.244781	2.29827	-1.33474	0.183468	0.309788	-5.87547
ENSG00000102125	TAZ	-0.212054	0.871016	-1.45597	0.146957	0.264857	-5.57506
ENSG00000102144	PGK1	0.0176949	4.39616	0.141632	0.887512	0.932608	-6.78569
ENSG00000102158	MAGT1	-0.0964553	1.36548	-0.788928	0.431081	0.57618	-6.37036
ENSG00000102172	SMS	-0.231106	1.51279	-1.69369	0.0918704	0.186469	-5.28613
ENSG00000102181	CD99L2	-0.435096	0.369201	-2.85916	0.00469456	0.0189321	-2.59806
ENSG00000102189	EEA1	-0.124088	0.0526506	-0.747111	0.455868	0.599921	-6.20387
ENSG00000102218	RP2	0.685816	1.9103	4.66836	5.53487e-06	8.28044e-05	3.54276
ENSG00000102225	CDK16	-0.104055	1.81992	-0.761993	0.446955	0.591931	-6.43069
ENSG00000102226	USP11	-0.256999	0.977519	-1.6143	0.108026	0.209829	-5.35702
ENSG00000102265	TIMP1	-0.150505	6.78785	-0.752747	0.452481	0.59708	-6.50259
ENSG00000102316	MAGED2	-0.0327684	0.949026	-0.168993	0.865971	0.918111	-6.61046
ENSG00000102317	RBM3	-0.0893575	2.46973	-0.491316	0.623737	0.74308	-6.63931
ENSG00000102390	PBDC1	-0.167341	-0.138869	-0.800038	0.424631	0.570558	-6.12209
ENSG00000102393	GLA	0.563802	2.88608	2.86011	0.00468111	0.0188856	-2.78695
ENSG00000102401	ARMCX3	0.109675	1.51684	0.75758	0.449588	0.594458	-6.3982
ENSG00000102445	RUBCNL	-0.161245	2.80469	-0.687453	0.492588	0.633832	-6.5377
ENSG00000102524	TNFSF13B	1.66627	3.8307	6.87985	7.40007e-11	6.44658e-09	14.2861
ENSG00000102531	FNDC3A	0.353661	2.33561	2.5248	0.0123472	0.0410905	-3.62941
ENSG00000102543	CDADC1	0.792827	0.436933	3.58488	0.000423084	0.00273173	-0.348609
ENSG00000102547	CAB39L	0.0706643	-0.36705	0.28406	0.776656	0.858359	-6.32249
ENSG00000102554	KLF5	-0.563269	1.22233	-2.10816	0.0362537	0.092359	-4.50782
ENSG00000102572	STK24	-0.00486831	2.84551	-0.0367447	0.970725	0.983615	-6.76981
ENSG00000102575	ACP5	-1.62374	2.51428	-6.13024	4.54874e-09	1.9218e-07	10.3
ENSG00000102580	DNAJC3	0.0727664	2.11599	0.477793	0.633316	0.751218	-6.62135
ENSG00000102595	UGGT2	-0.328562	0.0145152	-1.40643	0.161138	0.282199	-5.51841
ENSG00000102606	ARHGEF7	-0.176878	1.47164	-1.45219	0.148004	0.265979	-5.65235
ENSG00000102699	PARP4	0.37593	2.30377	2.22073	0.027483	0.0751507	-4.31944
ENSG00000102710	SUPT20H	0.100248	1.6991	0.654295	0.513668	0.652373	-6.48732
ENSG00000102755	FLT1	0.260147	0.912299	1.43712	0.152236	0.270996	-5.58854
ENSG00000102760	RGCC	-0.7783	2.99237	-3.06719	0.00245759	0.0113473	-2.22102
ENSG00000102786	INTS6	-0.0547921	2.24209	-0.444538	0.657131	0.77007	-6.64756
ENSG00000102794	ACOD1	3.03761	1.7354	6.29065	1.9314e-09	9.60236e-08	11.2182
ENSG00000102796	DHRS12	-0.128285	0.769026	-0.587428	0.557574	0.68937	-6.42522
ENSG00000102804	TSC22D1	-0.455185	1.16521	-2.36072	0.0191946	0.0574809	-3.95263
ENSG00000102805	CLN5	-0.217855	1.76582	-1.06545	0.287947	0.43269	-6.15992
ENSG00000102854	MSLN	-1.20075	-0.198523	-4.21537	3.76363e-05	0.000383532	1.87187
ENSG00000102858	MGRN1	-0.128188	3.11044	-1.03919	0.299961	0.444902	-6.24605
ENSG00000102871	TRADD	-0.0500968	0.807517	-0.339395	0.734666	0.828603	-6.54795
ENSG00000102879	CORO1A	0.530285	5.22727	3.31707	0.00107916	0.00580506	-1.48101
ENSG00000102882	MAPK3	-0.076784	2.41529	-0.554437	0.579895	0.709128	-6.60354
ENSG00000102886	GDPD3	-0.527786	-0.506029	-2.44982	0.0151467	0.0480361	-3.47992
ENSG00000102893	PHKB	-0.0552809	1.54541	-0.396814	0.691925	0.796392	-6.61667
ENSG00000102897	LYRM1	0.628905	2.22004	4.19844	4.03168e-05	0.000406862	1.64534
ENSG00000102898	NUTF2	-0.612621	1.0126	-3.48786	0.000597781	0.00364143	-0.819424
ENSG00000102900	NUP93	-0.499236	0.939134	-3.05798	0.00253086	0.0116257	-2.12653
ENSG00000102901	CENPT	-0.405366	0.129169	-2.27437	0.0239974	0.0679018	-3.9858
ENSG00000102908	NFAT5	0.16025	2.11245	1.37753	0.169876	0.292712	-5.7958
ENSG00000102910	LONP2	-0.288506	0.330631	-2.25002	0.0255288	0.0712116	-4.07758
ENSG00000102921	N4BP1	0.941015	4.20678	5.29468	3.10569e-07	7.43854e-06	6.22461
ENSG00000102931	ARL2BP	-0.384287	0.24473	-1.5993	0.111321	0.214836	-5.27547
ENSG00000102974	CTCF	-0.0426797	0.730301	-0.403633	0.68691	0.792447	-6.50376
ENSG00000102978	POLR2C	-0.0125706	1.00414	-0.0912904	0.927353	0.95831	-6.62615
ENSG00000103005	USB1	0.282842	3.41124	2.28258	0.0234993	0.0669543	-4.23074
ENSG00000103018	CYB5B	-0.0380397	0.515785	-0.225295	0.821978	0.889512	-6.51944
ENSG00000103035	PSMD7	0.0444399	1.8928	0.355893	0.722293	0.819129	-6.65463
ENSG00000103042	SLC38A7	0.0790695	0.359087	0.407462	0.684101	0.79041	-6.43329
ENSG00000103043	VAC14	-0.255619	1.70978	-1.72411	0.0862213	0.178386	-5.2534
ENSG00000103047	TANGO6	-0.354151	0.225699	-1.5227	0.129403	0.240438	-5.39002
ENSG00000103051	COG4	0.171332	0.370525	1.05199	0.294064	0.438587	-5.97086
ENSG00000103056	SMPD3	-0.558148	-0.44773	-2.21981	0.0275466	0.0752956	-4.01707
ENSG00000103064	SLC7A6	-0.204309	0.507587	-1.09273	0.275818	0.419782	-5.96863
ENSG00000103066	PLA2G15	-1.14216	0.695235	-5.79897	2.54964e-08	8.86879e-07	8.70783
ENSG00000103091	WDR59	-0.290446	1.05407	-1.39626	0.164172	0.286038	-5.68938
ENSG00000103111	MON1B	-0.259828	1.97692	-2.01026	0.0457373	0.110217	-4.75234
ENSG00000103121	CMC2	0.413551	1.50716	1.97902	0.0491757	0.116563	-4.7518
ENSG00000103126	AXIN1	-0.0625519	0.546244	-0.480624	0.631305	0.749646	-6.44638
ENSG00000103145	HCFC1R1	-0.187784	0.135795	-0.971636	0.332397	0.478449	-6.02931
ENSG00000103152	MPG	-0.0608514	0.016225	-0.313647	0.754114	0.842985	-6.40292
ENSG00000103160	HSDL1	0.277383	0.599478	1.42549	0.155562	0.275424	-5.54011
ENSG00000103168	TAF1C	0.518924	1.75658	2.09101	0.0377813	0.0954374	-4.53786
ENSG00000103174	NAGPA	-0.641888	0.224216	-3.51438	0.000544266	0.0033739	-0.649568
ENSG00000103187	COTL1	0.0511804	5.33267	0.433717	0.664958	0.77631	-6.70239
ENSG00000103194	USP10	-0.0661768	3.27428	-0.422102	0.673401	0.782917	-6.69458
ENSG00000103196	CRISPLD2	0.351687	2.04534	2.07362	0.0393862	0.0982809	-4.61068
ENSG00000103197	TSC2	-0.237141	2.37707	-1.61245	0.10843	0.210483	-5.47692
ENSG00000103222	ABCC1	0.137449	1.53468	1.01291	0.312316	0.457437	-6.17601
ENSG00000103226	NOMO3	-0.547784	1.14226	-2.39479	0.0175461	0.0537077	-3.87403
ENSG00000103245	CIAO3	-0.570034	-0.107596	-2.98179	0.00321899	0.0141211	-2.1948
ENSG00000103248	MTHFSD	-0.210101	0.141473	-1.06416	0.288529	0.432969	-5.93453
ENSG00000103249	CLCN7	0.524656	3.8882	2.59027	0.0102908	0.0352846	-3.5142
ENSG00000103254	ANTKMT	-0.496133	-0.51928	-2.12667	0.0346641	0.0894452	-4.19995
ENSG00000103257	SLC7A5	0.852474	3.15914	4.80822	2.97564e-06	4.92305e-05	4.08112
ENSG00000103264	FBXO31	-1.10933	-0.474235	-5.13288	6.69878e-07	1.42198e-05	5.67826
ENSG00000103266	STUB1	-0.545603	1.05432	-2.60279	0.00993425	0.0343494	-3.36803
ENSG00000103274	NUBP1	-0.236869	0.553385	-1.2092	0.228004	0.365966	-5.85265
ENSG00000103275	UBE2I	0.168495	2.02679	1.24915	0.213059	0.347244	-5.95586
ENSG00000103313	MEFV	1.02792	3.82508	6.45572	7.88445e-10	4.51247e-08	11.9893
ENSG00000103326	CAPN15	-0.382662	1.40341	-2.23942	0.0262219	0.0726092	-4.23995
ENSG00000103335	PIEZO1	-0.176591	1.58976	-0.997224	0.319852	0.465458	-6.21251
ENSG00000103342	GSPT1	-0.317479	1.63051	-2.09838	0.0371177	0.0940506	-4.55272
ENSG00000103351	CLUAP1	-0.809492	-0.33353	-3.37863	0.000874494	0.00493042	-0.999037
ENSG00000103353	UBFD1	-0.363238	0.517762	-1.88324	0.0611086	0.137184	-4.83891
ENSG00000103363	ELOB	-0.257908	3.05179	-1.49134	0.137436	0.252393	-5.68337
ENSG00000103365	GGA2	-0.871941	1.86674	-5.02498	1.10807e-06	2.19474e-05	5.04141
ENSG00000103381	CPPED1	0.358447	2.20013	2.08119	0.0386809	0.0969189	-4.60566
ENSG00000103415	HMOX2	-0.848344	0.82969	-5.4959	1.16684e-07	3.30069e-06	7.24444
ENSG00000103423	DNAJA3	-0.502976	0.248443	-2.37896	0.0182956	0.0553988	-3.78811
ENSG00000103429	BFAR	0.144876	1.22747	1.17042	0.243216	0.383092	-5.97318
ENSG00000103479	RBL2	0.0139584	1.75023	0.124009	0.901432	0.940807	-6.70071
ENSG00000103490	PYCARD	-0.0296642	3.00843	-0.170741	0.864599	0.917541	-6.76186
ENSG00000103495	MAZ	-0.453841	2.01305	-2.70928	0.00732366	0.0269712	-3.16846
ENSG00000103496	STX4	0.183409	4.07024	1.23512	0.218223	0.353998	-6.0387
ENSG00000103502	CDIPT	0.23548	1.16213	1.5992	0.111343	0.214836	-5.37972
ENSG00000103507	BCKDK	-0.126602	1.97692	-0.96524	0.335582	0.481695	-6.27064
ENSG00000103510	KAT8	-0.281888	1.80154	-2.255	0.025209	0.0704391	-4.23588
ENSG00000103512	NOMO1	-0.177951	0.576121	-0.895414	0.371635	0.519655	-6.17562
ENSG00000103534	TMC5	-1.19108	0.252774	-4.32275	2.42083e-05	0.000269273	2.23006
ENSG00000103544	VPS35L	-0.229883	1.40569	-1.36378	0.174159	0.298005	-5.767
ENSG00000103549	RNF40	-0.146374	2.30033	-1.14673	0.252854	0.394405	-6.10131
ENSG00000103569	AQP9	0.721578	7.05679	4.53544	9.85988e-06	0.000131163	2.9285
ENSG00000103591	AAGAB	0.30703	0.757869	1.87524	0.0622071	0.139185	-4.85098
ENSG00000103642	LACTB	0.845332	2.52499	4.9382	1.65176e-06	3.08148e-05	4.66304
ENSG00000103653	CSK	0.334744	3.63874	2.37379	0.0185465	0.0560035	-4.02886
ENSG00000103657	HERC1	-0.0368008	1.98884	-0.286909	0.774477	0.857054	-6.68814
ENSG00000103671	TRIP4	0.349681	1.01784	2.3679	0.018836	0.0566732	-3.87694
ENSG00000103723	AP3B2	0.145721	0.60737	0.586705	0.558059	0.689765	-6.3744
ENSG00000103769	RAB11A	0.235248	3.2184	1.65472	0.0995373	0.197419	-5.4291
ENSG00000103811	CTSH	-0.278105	4.06375	-1.60088	0.110971	0.21449	-5.53012
ENSG00000103855	CD276	-1.57886	0.843412	-7.66006	7.64347e-13	1.74982e-10	18.7427
ENSG00000103876	FAH	-0.895432	-0.19846	-4.11845	5.56489e-05	0.000526894	1.50829
ENSG00000103888	CEMIP	0.765045	0.378011	2.49086	0.0135515	0.0442175	-3.4507
ENSG00000103932	RPAP1	-0.622278	-0.234108	-2.6851	0.00785487	0.0284486	-2.98187
ENSG00000103942	HOMER2	-0.960386	-0.587925	-4.45202	1.40777e-05	0.000174839	2.83257
ENSG00000103966	EHD4	-0.214834	1.03385	-1.56811	0.118424	0.224705	-5.43208
ENSG00000103978	TMEM87A	-0.00793249	1.19333	-0.0651339	0.948132	0.969302	-6.64767
ENSG00000103994	ZNF106	-0.209147	2.33638	-1.8045	0.0726462	0.156655	-5.15012
ENSG00000103995	CEP152	-0.053345	-0.430679	-0.225704	0.821661	0.889512	-6.345
ENSG00000104043	ATP8B4	0.763454	1.23469	3.73004	0.000248867	0.00176629	0.0316436
ENSG00000104047	DTWD1	7.60768e-05	0.88878	0.000385882	0.999692	1	-6.6045
ENSG00000104064	GABPB1	0.317759	1.07262	1.77617	0.0772148	0.163802	-5.07034
ENSG00000104067	TJP1	-0.898716	-0.31708	-4.66036	5.73273e-06	8.53772e-05	3.6479
ENSG00000104081	BMF	0.0877193	0.419749	0.440036	0.660383	0.772434	-6.43081
ENSG00000104093	DMXL2	0.768213	3.83331	4.36255	2.05128e-05	0.000237843	2.23335
ENSG00000104129	DNAJC17	-0.0743847	0.123514	-0.307219	0.758994	0.846633	-6.44123
ENSG00000104131	EIF3J	0.12946	1.82755	0.888995	0.375066	0.522672	-6.32236
ENSG00000104133	SPG11	0.226948	3.24936	1.85938	0.064431	0.142626	-5.07885
ENSG00000104142	VPS18	0.285835	1.44131	1.89743	0.0592015	0.133942	-4.90427
ENSG00000104154	SLC30A4	0.706964	0.681693	3.53652	0.000503087	0.00315238	-0.556343
ENSG00000104164	BLOC1S6	-0.0495905	3.44986	-0.19481	0.845738	0.904743	-6.76802
ENSG00000104177	MYEF2	-0.0897791	0.396119	-0.33729	0.73625	0.829914	-6.46685
ENSG00000104205	SGK3	0.284362	2.20666	1.64005	0.102556	0.201993	-5.41144
ENSG00000104219	ZDHHC2	0.34998	0.612037	1.49619	0.136169	0.250597	-5.4504
ENSG00000104228	TRIM35	-0.390178	-0.637893	-1.83483	0.0680054	0.148865	-4.73433
ENSG00000104267	CA2	-0.509207	-0.221169	-2.04259	0.0423952	0.103871	-4.40955
ENSG00000104299	INTS9	-0.2519	0.249416	-1.50674	0.133443	0.246411	-5.4043
ENSG00000104312	RIPK2	0.496409	3.05203	2.65558	0.00855059	0.0303541	-3.33169
ENSG00000104320	NBN	1.69549	4.41407	8.17218	3.31115e-14	1.25365e-11	21.7787
ENSG00000104324	CPQ	-0.129554	2.60282	-0.840181	0.401803	0.54943	-6.41556
ENSG00000104325	DECR1	0.229323	2.94758	1.41369	0.158997	0.279493	-5.7847
ENSG00000104331	IMPAD1	-0.355622	0.422712	-1.89579	0.0594189	0.134187	-4.80217
ENSG00000104343	UBE2W	0.361591	1.90517	2.67077	0.00818598	0.0293577	-3.23777
ENSG00000104365	IKBKB	0.2295	2.73409	1.8198	0.0702729	0.152674	-5.13385
ENSG00000104375	STK3	0.182206	1.82481	1.07271	0.284683	0.429622	-6.13816
ENSG00000104388	RAB2A	0.0829552	2.8123	0.59902	0.549833	0.683638	-6.59071
ENSG00000104408	EIF3E	-0.342247	2.33942	-2.05539	0.0411313	0.101503	-4.6846
ENSG00000104412	EMC2	0.325746	1.79304	1.78815	0.0752549	0.160836	-5.13084
ENSG00000104419	NDRG1	-0.0463049	4.47261	-0.286671	0.774659	0.857114	-6.75543
ENSG00000104432	IL7	0.379288	-0.0789482	1.40838	0.160559	0.281447	-5.43853
ENSG00000104447	TRPS1	0.210162	1.68358	1.46853	0.14352	0.260281	-5.6304
ENSG00000104450	SPAG1	-0.286488	-0.0100548	-1.30167	0.194515	0.323974	-5.64719
ENSG00000104472	CHRAC1	0.0893788	0.234135	0.515289	0.606916	0.730243	-6.36
ENSG00000104490	NCALD	-0.724035	-0.180717	-2.4415	0.0154893	0.0489022	-3.58633
ENSG00000104497	SNX16	0.452727	0.0582474	2.43521	0.0157533	0.0494817	-3.57381
ENSG00000104517	UBR5	-0.0865954	1.98258	-0.747069	0.455893	0.599921	-6.45275
ENSG00000104518	GSDMD	0.501729	2.7475	3.39831	0.000817108	0.00467209	-1.19157
ENSG00000104522	TSTA3	-0.180957	0.868552	-1.09962	0.272809	0.41675	-6.02645
ENSG00000104529	EEF1D	-0.140621	4.86745	-1.28724	0.199489	0.329712	-5.9776
ENSG00000104549	SQLE	-0.198001	0.33104	-1.02942	0.304515	0.449228	-5.99542
ENSG00000104611	SH2D4A	-0.421625	-0.186213	-1.83138	0.0685209	0.149694	-4.8147
ENSG00000104613	INTS10	-0.215186	1.52577	-1.34303	0.180772	0.306285	-5.80694
ENSG00000104626	ERI1	0.270632	1.75482	1.49128	0.137452	0.252393	-5.60119
ENSG00000104660	LEPROTL1	0.00133592	1.55105	0.00786211	0.993735	0.996657	-6.68928
ENSG00000104671	DCTN6	-0.299097	0.584972	-1.6971	0.0912211	0.185648	-5.16528
ENSG00000104687	GSR	-0.149374	1.78524	-1.06508	0.288115	0.432829	-6.16002
ENSG00000104689	TNFRSF10A	0.0151475	0.731368	0.0896138	0.928683	0.95898	-6.57411
ENSG00000104695	PPP2CB	-0.303115	1.89912	-2.17065	0.0311271	0.0823697	-4.42563
ENSG00000104714	ERICH1	0.105235	2.80054	0.600429	0.548895	0.683187	-6.58921
ENSG00000104731	KLHDC4	-0.487339	0.563496	-2.1749	0.0308025	0.0816205	-4.28552
ENSG00000104738	MCM4	-0.104043	0.60048	-0.412584	0.68035	0.787464	-6.48908
ENSG00000104756	KCTD9	0.0559738	0.794713	0.296638	0.767049	0.852334	-6.54803
ENSG00000104763	ASAH1	0.134338	5.10175	0.874209	0.383045	0.531048	-6.41787
ENSG00000104765	BNIP3L	0.432249	2.27157	2.57619	0.010705	0.0364133	-3.499
ENSG00000104774	MAN2B1	-0.239577	3.29497	-1.7798	0.0766156	0.162825	-5.22608
ENSG00000104783	KCNN4	0.326737	1.4216	1.68831	0.0928986	0.187898	-5.25955
ENSG00000104804	TULP2	1.01245	1.40047	2.52705	0.0122709	0.0408782	-3.49692
ENSG00000104805	NUCB1	-0.0288128	4.18833	-0.188809	0.850432	0.907537	-6.77662
ENSG00000104812	GYS1	0.0394498	1.35518	0.23966	0.810838	0.883497	-6.64336
ENSG00000104814	MAP4K1	-0.246203	0.232387	-0.909528	0.364159	0.512038	-6.1041
ENSG00000104823	ECH1	-0.651688	2.00477	-3.67145	0.000308909	0.00210683	-0.282617
ENSG00000104824	HNRNPL	-0.174389	3.2308	-1.61692	0.10746	0.209094	-5.49452
ENSG00000104825	NFKBIB	0.348957	1.67416	2.41522	0.0166184	0.0515249	-3.84459
ENSG00000104852	SNRNP70	-0.245017	2.5331	-1.55984	0.120367	0.227645	-5.56374
ENSG00000104853	CLPTM1	-0.265773	2.00317	-2.46405	0.0145754	0.0466603	-3.77181
ENSG00000104856	RELB	0.5751	3.16514	4.04125	7.5617e-05	0.000672424	1.01366
ENSG00000104859	CLASRP	0.155568	2.47185	1.21169	0.227049	0.36485	-6.02729
ENSG00000104866	PPP1R37	-0.445567	0.0495916	-2.28186	0.0235424	0.06698	-3.96923
ENSG00000104870	FCGRT	-0.499313	3.56675	-3.46014	0.00065893	0.00395037	-1.02098
ENSG00000104872	PIH1D1	-0.0626537	0.741427	-0.306422	0.7596	0.847021	-6.54875
ENSG00000104880	ARHGEF18	-0.0251767	0.617408	-0.158929	0.873884	0.923564	-6.55283
ENSG00000104885	DOT1L	-0.0147205	2.88738	-0.0868001	0.930917	0.959877	-6.7691
ENSG00000104886	PLEKHJ1	0.015896	1.32875	0.102883	0.918158	0.951906	-6.66359
ENSG00000104894	CD37	0.643609	4.85754	4.38008	1.90632e-05	0.000223669	2.29432
ENSG00000104897	SF3A2	-0.121425	1.21164	-0.851451	0.39553	0.543252	-6.30333
ENSG00000104903	LYL1	0.0796896	1.03998	0.470582	0.638449	0.755123	-6.5073
ENSG00000104904	OAZ1	-0.169785	6.45958	-1.70991	0.0888222	0.182311	-5.3456
ENSG00000104907	TRMT1	-0.406772	0.105977	-1.83412	0.0681119	0.149065	-4.86808
ENSG00000104915	STX10	0.135019	1.94292	0.861034	0.390243	0.538409	-6.34967
ENSG00000104918	RETN	-0.23904	2.54066	-0.732132	0.464939	0.608463	-6.48867
ENSG00000104936	DMPK	-0.994301	-0.424897	-4.17147	4.49691e-05	0.000443712	1.73663
ENSG00000104946	TBC1D17	0.719181	1.47879	4.74255	3.989e-06	6.303e-05	3.88477
ENSG00000104951	IL4I1	1.66317	2.16382	6.16381	3.80665e-09	1.65088e-07	10.52
ENSG00000104957	CCDC130	-0.0747027	1.1087	-0.525936	0.599511	0.724477	-6.50504
ENSG00000104960	PTOV1	-0.603756	1.94499	-4.38683	1.85315e-05	0.000218768	2.36302
ENSG00000104964	TLE5	-0.782022	3.06689	-4.1057	5.85585e-05	0.000546398	1.24423
ENSG00000104969	SGTA	-0.150199	1.5541	-1.20182	0.230845	0.369262	-5.98292
ENSG00000104972	LILRB1	0.824066	3.42037	3.7504	0.000230724	0.00166027	-0.0318469
ENSG00000104973	MED25	-0.106728	2.18755	-0.838545	0.402719	0.550071	-6.39553
ENSG00000104974	LILRA1	0.932016	1.35689	4.4777	1.26225e-05	0.00016033	2.82298
ENSG00000104976	SNAPC2	-0.353482	-0.122427	-1.67605	0.0952788	0.191012	-5.08101
ENSG00000104979	C19orf53	-0.227986	1.54702	-1.37432	0.170869	0.293908	-5.76996
ENSG00000104980	TIMM44	-0.513986	0.461776	-2.68233	0.00791801	0.0286457	-3.09072
ENSG00000104983	CCDC61	-0.935099	-0.609715	-3.71865	0.0002596	0.0018319	0.143932
ENSG00000104998	IL27RA	0.183501	-0.242995	1.21795	0.224667	0.361849	-5.64998
ENSG00000105053	VRK3	0.114511	2.20784	1.08685	0.2784	0.422526	-6.15606
ENSG00000105058	FAM32A	0.0359395	1.72357	0.274077	0.784306	0.863928	-6.66755
ENSG00000105063	PPP6R1	-0.0579521	2.54656	-0.503865	0.614907	0.736302	-6.6355
ENSG00000105085	MED26	-0.298829	-0.113055	-1.66089	0.0982904	0.195666	-5.09266
ENSG00000105122	RASAL3	0.470799	1.60049	2.47141	0.0142877	0.0460236	-3.698
ENSG00000105127	AKAP8	-0.216473	0.436099	-1.4519	0.148086	0.266014	-5.51637
ENSG00000105135	ILVBL	-0.579553	-0.15863	-2.75937	0.006325	0.0240213	-2.79826
ENSG00000105171	POP4	0.200485	0.967757	1.03498	0.301917	0.446727	-6.08023
ENSG00000105176	URI1	-0.0686726	0.614362	-0.366116	0.714662	0.813311	-6.51066
ENSG00000105185	PDCD5	-0.578934	0.638097	-2.62268	0.00939087	0.0327582	-3.26723
ENSG00000105186	ANKRD27	-0.0900616	0.459004	-0.600082	0.549126	0.683357	-6.36069
ENSG00000105193	RPS16	-0.263819	5.08559	-1.64463	0.101606	0.200485	-5.46258
ENSG00000105197	TIMM50	-0.846987	1.13348	-4.88702	2.08542e-06	3.70963e-05	4.47443
ENSG00000105202	FBL	-0.400999	1.30898	-2.29748	0.0226184	0.0651612	-4.10506
ENSG00000105220	GPI	-0.522862	2.80848	-3.34075	0.000995648	0.00543905	-1.39005
ENSG00000105221	AKT2	0.111699	2.79073	0.944853	0.345865	0.492721	-6.32545
ENSG00000105223	PLD3	-0.859187	2.74477	-5.02042	1.13167e-06	2.2351e-05	4.99464
ENSG00000105229	PIAS4	0.131522	1.19115	0.762306	0.446769	0.591764	-6.35345
ENSG00000105245	NUMBL	-0.82177	-0.334738	-3.85006	0.000158555	0.00122995	0.567937
ENSG00000105246	EBI3	1.37805	0.149544	4.0186	8.26686e-05	0.000724012	1.21379
ENSG00000105248	YJU2	0.385468	-0.273357	2.10409	0.0366109	0.0930778	-4.2181
ENSG00000105254	TBCB	-0.264165	2.02534	-2.02406	0.0442842	0.107452	-4.72898
ENSG00000105258	POLR2I	-1.00076	0.338572	-3.67208	0.000308194	0.00210393	-0.147469
ENSG00000105281	SLC1A5	-0.500624	0.674231	-2.87036	0.00453775	0.0185024	-2.61692
ENSG00000105287	PRKD2	0.558196	2.96611	3.36937	0.000902757	0.00505791	-1.28966
ENSG00000105289	TJP3	-0.828501	-0.0400782	-3.13257	0.00199099	0.00959339	-1.7974
ENSG00000105290	APLP1	-0.506014	-0.00599408	-1.55382	0.121797	0.229468	-5.30006
ENSG00000105321	CCDC9	0.390912	2.1185	2.65525	0.00855862	0.0303554	-3.29164
ENSG00000105323	HNRNPUL1	-0.445993	2.76779	-3.45113	0.000680056	0.00404255	-1.03654
ENSG00000105325	FZR1	-0.0603358	1.60465	-0.421437	0.673885	0.78309	-6.61351
ENSG00000105327	BBC3	0.226582	1.15013	1.0472	0.296261	0.440942	-6.09691
ENSG00000105329	TGFB1	0.237882	3.85276	1.79512	0.0741336	0.159076	-5.20356
ENSG00000105339	DENND3	0.298756	5.24601	1.72465	0.0861245	0.178224	-5.33094
ENSG00000105341	DMAC2	-0.136817	0.391226	-0.943376	0.346618	0.493436	-6.09984
ENSG00000105352	CEACAM4	0.500682	1.48882	2.13863	0.0336694	0.0873594	-4.41653
ENSG00000105355	PLIN3	0.0142865	3.00922	0.130968	0.895931	0.93765	-6.76656
ENSG00000105357	MYH14	-1.26017	0.515201	-4.34764	2.18295e-05	0.000249292	2.29786
ENSG00000105364	MRPL4	-0.694037	-0.184026	-3.45116	0.000679971	0.00404255	-0.788594
ENSG00000105372	RPS19	-0.37756	4.86057	-1.99294	0.0476174	0.113718	-4.84438
ENSG00000105373	NOP53	-0.555006	2.43344	-3.46063	0.000657802	0.00394601	-0.998692
ENSG00000105374	NKG7	1.50224	2.65663	4.96814	1.44003e-06	2.74191e-05	4.80457
ENSG00000105379	ETFB	-0.437401	1.19402	-2.72597	0.00697605	0.0260122	-3.06156
ENSG00000105383	CD33	-0.578207	0.0065597	-3.08665	0.00230913	0.0107833	-1.92149
ENSG00000105388	CEACAM5	-0.280813	1.0217	-0.766839	0.444075	0.589068	-6.34289
ENSG00000105393	BABAM1	-0.248233	1.15633	-1.3683	0.172741	0.296094	-5.74012
ENSG00000105397	TYK2	0.00208518	3.64842	0.0152384	0.987857	0.993712	-6.78925
ENSG00000105401	CDC37	-0.238241	3.30738	-1.70824	0.089132	0.182669	-5.34783
ENSG00000105402	NAPA	0.873543	4.37677	6.17927	3.50617e-09	1.56175e-07	10.5411
ENSG00000105404	RABAC1	-0.0981099	2.48826	-0.597	0.551178	0.68447	-6.58218
ENSG00000105438	KDELR1	-0.727798	1.71727	-4.83159	2.67902e-06	4.5515e-05	4.21005
ENSG00000105443	CYTH2	-0.651306	1.57197	-4.73114	4.19606e-06	6.5565e-05	3.79315
ENSG00000105483	CARD8	0.308612	3.44054	2.24309	0.0259796	0.0721419	-4.31719
ENSG00000105486	LIG1	-0.204144	-0.0630322	-0.83969	0.402077	0.549577	-6.10626
ENSG00000105499	PLA2G4C	0.330505	1.23243	1.33445	0.183563	0.309894	-5.75902
ENSG00000105501	SIGLEC5	1.20748	2.39141	4.69215	4.985e-06	7.59633e-05	3.63054
ENSG00000105514	RAB3D	0.200472	1.94607	1.02589	0.306172	0.450999	-6.19257
ENSG00000105518	TMEM205	-0.120594	0.546442	-0.690468	0.490695	0.632534	-6.33291
ENSG00000105519	CAPS	-1.66669	1.05084	-4.72964	4.22409e-06	6.56902e-05	3.7917
ENSG00000105520	PLPPR2	0.254407	1.86077	1.42052	0.157002	0.277076	-5.71016
ENSG00000105523	FAM83E	-0.684428	-0.543632	-2.52131	0.0124663	0.0413853	-3.32958
ENSG00000105556	MIER2	-0.620556	0.00106947	-3.16865	0.00177001	0.00872071	-1.6791
ENSG00000105559	PLEKHA4	-0.129162	0.0603299	-0.529022	0.597373	0.722957	-6.34349
ENSG00000105568	PPP2R1A	-0.415811	2.36064	-2.83578	0.00503782	0.0200292	-2.85071
ENSG00000105576	TNPO2	-0.0251036	1.19442	-0.171467	0.864028	0.917134	-6.63576
ENSG00000105583	WDR83OS	0.0315423	1.49717	0.124752	0.900844	0.940493	-6.67262
ENSG00000105607	GCDH	-0.401075	-0.171314	-1.81569	0.0709039	0.153638	-4.85273
ENSG00000105609	LILRB5	-0.0485041	-0.127024	-0.357474	0.721111	0.818066	-6.35291
ENSG00000105612	DNASE2	-0.0617934	1.11411	-0.316042	0.752298	0.841739	-6.5939
ENSG00000105618	PRPF31	-0.612863	0.144981	-3.81993	0.000177737	0.00135476	0.400608
ENSG00000105619	TFPT	-0.431133	-0.157754	-2.22238	0.0273698	0.0749554	-4.05733
ENSG00000105639	JAK3	0.936339	3.7022	5.48165	1.25166e-07	3.49047e-06	7.10302
ENSG00000105640	RPL18A	-0.660032	4.44464	-3.55591	0.000469445	0.00297951	-0.711843
ENSG00000105643	ARRDC2	0.18445	2.33251	1.15184	0.250752	0.392059	-6.09113
ENSG00000105647	PIK3R2	-0.590841	-0.0148882	-2.33965	0.0202808	0.0598635	-3.82689
ENSG00000105655	ISYNA1	-0.383468	-0.0304614	-1.86891	0.0630872	0.140679	-4.77048
ENSG00000105656	ELL	0.0387663	2.77477	0.259657	0.795393	0.872756	-6.73455
ENSG00000105669	COPE	-0.0165725	3.25463	-0.139255	0.889388	0.933582	-6.77272
ENSG00000105671	DDX49	0.0442293	0.819649	0.252687	0.800768	0.876349	-6.56551
ENSG00000105676	ARMC6	-0.0438363	-0.0584508	-0.239593	0.810889	0.883497	-6.39847
ENSG00000105677	TMEM147	-0.713498	0.419289	-3.84904	0.00015917	0.00123279	0.470656
ENSG00000105697	HAMP	2.0798	1.18902	5.24574	3.92559e-07	9.15723e-06	6.17709
ENSG00000105698	USF2	0.202052	3.70503	1.48599	0.138846	0.254335	-5.69887
ENSG00000105699	LSR	-0.314323	0.451616	-1.3541	0.177221	0.301619	-5.65784
ENSG00000105700	KXD1	-0.325943	2.08128	-2.44889	0.0151845	0.0481094	-3.81515
ENSG00000105701	FKBP8	-0.110108	3.51269	-0.874922	0.382658	0.530771	-6.40908
ENSG00000105705	SUGP1	0.252824	0.781963	1.48253	0.139763	0.255256	-5.50001
ENSG00000105707	HPN	0.61484	0.578349	2.12094	0.0351496	0.0904371	-4.31761
ENSG00000105711	SCN1B	0.710358	1.67019	2.72818	0.00693111	0.025874	-3.0482
ENSG00000105722	ERF	-0.5879	1.86027	-3.20095	0.00159167	0.00802275	-1.7869
ENSG00000105723	GSK3A	-0.0829477	1.78874	-0.67136	0.50276	0.64275	-6.4917
ENSG00000105726	ATP13A1	0.224148	1.52719	1.30715	0.192652	0.321653	-5.83576
ENSG00000105738	SIPA1L3	-0.279397	1.09232	-1.23639	0.217753	0.353431	-5.90317
ENSG00000105755	ETHE1	-0.682341	0.376387	-3.1951	0.00162267	0.00812902	-1.66869
ENSG00000105771	SMG9	-0.0145285	2.06859	-0.08587	0.931655	0.960336	-6.7304
ENSG00000105778	AVL9	0.305795	1.92319	2.51341	0.0127402	0.042015	-3.63168
ENSG00000105792	CFAP69	-0.512744	0.146594	-2.38499	0.0180067	0.0547251	-3.7583
ENSG00000105808	RASA4	-0.398946	1.00461	-1.82231	0.0698902	0.151943	-5.02743
ENSG00000105810	CDK6	-0.134878	-0.342265	-0.747369	0.455712	0.599897	-6.1084
ENSG00000105819	PMPCB	0.0557182	0.538608	0.429152	0.668271	0.77907	-6.44762
ENSG00000105821	DNAJC2	0.202949	0.347138	1.36835	0.172726	0.296094	-5.58686
ENSG00000105835	NAMPT	0.751678	8.87685	4.24912	3.27908e-05	0.000343397	1.80497
ENSG00000105851	PIK3CG	0.266636	1.55916	1.65878	0.0987164	0.196197	-5.32333
ENSG00000105854	PON2	-0.853481	-0.513835	-3.97251	9.89897e-05	0.000837161	1.01535
ENSG00000105855	ITGB8	-0.881815	1.47845	-4.54215	9.57948e-06	0.00012865	3.01024
ENSG00000105856	HBP1	0.617964	3.27809	4.74882	3.87928e-06	6.1593e-05	3.82157
ENSG00000105866	SP4	0.492651	-0.431842	1.93624	0.0542371	0.125596	-4.51385
ENSG00000105875	WDR91	0.145285	1.00268	0.700747	0.484269	0.62602	-6.3752
ENSG00000105877	DNAH11	-0.695562	1.46756	-2.44616	0.0152965	0.0483864	-3.79073
ENSG00000105879	CBLL1	0.483643	0.535729	2.87057	0.00453489	0.0185004	-2.54637
ENSG00000105887	MTPN	0.038065	3.28846	0.290754	0.771538	0.855192	-6.74054
ENSG00000105928	GSDME	0.26129	-0.32422	1.07455	0.283864	0.42873	-5.78739
ENSG00000105939	ZC3HAV1	1.40344	2.518	6.25716	2.31222e-09	1.11576e-07	10.9833
ENSG00000105953	OGDH	-0.236063	2.44185	-2.11654	0.035526	0.0911674	-4.56159
ENSG00000105963	ADAP1	-0.137691	2.83818	-0.76706	0.443944	0.588989	-6.4818
ENSG00000105967	TFEC	1.42084	2.3565	5.40239	1.8448e-07	4.7918e-06	6.78206
ENSG00000105968	H2AZ2	-0.340231	1.9205	-2.32808	0.0209	0.0611404	-4.08437
ENSG00000105976	MET	-0.325257	0.16651	-1.44743	0.149329	0.267618	-5.47859
ENSG00000105983	LMBR1	-0.179498	1.68419	-1.20432	0.229878	0.368194	-5.99713
ENSG00000105993	DNAJB6	0.234919	3.7665	2.3337	0.0205973	0.0605433	-4.12279
ENSG00000106003	LFNG	-0.34737	1.99455	-2.33806	0.0203651	0.0600402	-4.06555
ENSG00000106009	BRAT1	-0.338441	0.256503	-2.42806	0.0160584	0.0501996	-3.66329
ENSG00000106012	IQCE	-0.1971	1.19089	-1.30149	0.194577	0.323974	-5.82339
ENSG00000106028	SSBP1	-0.221973	1.36868	-1.3903	0.165972	0.288306	-5.72898
ENSG00000106052	TAX1BP1	0.0522773	2.59722	0.420046	0.6749	0.783641	-6.67347
ENSG00000106066	CPVL	-0.188909	1.50976	-1.05344	0.293403	0.437902	-6.14393
ENSG00000106069	CHN2	-0.482464	-0.155521	-1.94277	0.0534374	0.124153	-4.61563
ENSG00000106070	GRB10	0.159631	1.70698	0.701862	0.483575	0.625452	-6.44934
ENSG00000106077	ABHD11	-0.899747	-0.0293323	-4.38681	1.85326e-05	0.000218768	2.51616
ENSG00000106089	STX1A	-0.776421	0.472712	-3.33375	0.00101967	0.00553344	-1.24977
ENSG00000106100	NOD1	0.269071	-0.509522	1.17706	0.240558	0.380472	-5.62844
ENSG00000106105	GARS1	0.0283076	2.32664	0.173032	0.8628	0.916324	-6.73416
ENSG00000106144	CASP2	0.00539813	0.0389618	0.0334644	0.973337	0.98545	-6.43939
ENSG00000106153	CHCHD2	-0.0812173	3.26485	-0.519172	0.60421	0.728084	-6.64954
ENSG00000106211	HSPB1	-1.23715	3.5623	-4.26959	3.01498e-05	0.000319477	1.86378
ENSG00000106244	PDAP1	0.00489706	2.90497	0.0291797	0.97675	0.986929	-6.77283
ENSG00000106245	BUD31	0.4616	2.51852	3.06612	0.00246603	0.0113703	-2.19447
ENSG00000106258	CYP3A5	-0.568783	-0.200483	-2.46972	0.0143532	0.0461589	-3.51168
ENSG00000106261	ZKSCAN1	0.0342027	1.62179	0.273473	0.78477	0.863988	-6.65919
ENSG00000106263	EIF3B	-0.436445	1.45262	-3.30998	0.00110542	0.00591401	-1.41922
ENSG00000106266	SNX8	0.138388	2.39511	0.754919	0.451179	0.595842	-6.46826
ENSG00000106268	NUDT1	-0.476767	0.603885	-1.39997	0.163061	0.284705	-5.62346
ENSG00000106290	TAF6	-0.455245	0.420631	-2.26643	0.0244873	0.0689315	-4.05825
ENSG00000106330	MOSPD3	-0.239876	-0.331592	-1.30814	0.192317	0.321257	-5.56775
ENSG00000106344	RBM28	-0.465377	0.345456	-2.65602	0.00853992	0.0303469	-3.13118
ENSG00000106346	USP42	0.440617	0.0901965	2.67155	0.00816761	0.0293224	-2.99721
ENSG00000106348	IMPDH1	0.0773989	3.27795	0.546919	0.58504	0.712675	-6.63382
ENSG00000106367	AP1S1	-0.167465	-0.0330173	-0.862343	0.389524	0.538021	-6.09635
ENSG00000106392	C1GALT1	0.768665	1.84616	4.28733	2.80265e-05	0.000300732	2.0181
ENSG00000106397	PLOD3	-0.825596	1.72259	-5.11129	7.41306e-07	1.54719e-05	5.43118
ENSG00000106399	RPA3	0.0277941	-0.241706	0.11887	0.905497	0.94292	-6.39647
ENSG00000106400	ZNHIT1	-0.0421246	1.8133	-0.330322	0.7415	0.833569	-6.6635
ENSG00000106415	GLCCI1	-0.0549775	-0.159153	-0.263256	0.792623	0.870435	-6.39275
ENSG00000106459	NRF1	0.0118949	0.00889753	0.0730202	0.941862	0.966204	-6.44273
ENSG00000106460	TMEM106B	-0.0242266	0.485187	-0.140578	0.888344	0.932972	-6.53086
ENSG00000106462	EZH2	0.961414	0.14211	4.35168	2.14647e-05	0.000245696	2.43584
ENSG00000106541	AGR2	-0.653673	1.74037	-1.78054	0.0764938	0.162671	-5.1644
ENSG00000106546	AHR	0.0716537	2.045	0.433097	0.665407	0.776443	-6.63164
ENSG00000106554	CHCHD3	0.0540472	0.3734	0.30033	0.764235	0.85036	-6.47995
ENSG00000106560	GIMAP2	1.10914	0.988827	3.97586	9.77068e-05	0.00082916	0.9478
ENSG00000106565	TMEM176B	1.58986	1.65791	5.2689	3.5143e-07	8.27626e-06	6.21414
ENSG00000106588	PSMA2	0.289046	1.36425	1.49018	0.137742	0.252763	-5.55696
ENSG00000106591	MRPL32	0.024013	-0.30018	0.10946	0.912946	0.947901	-6.37816
ENSG00000106603	COA1	-0.168284	1.28477	-1.40463	0.161672	0.282833	-5.6993
ENSG00000106605	BLVRA	-0.0461269	1.72598	-0.237205	0.812739	0.884191	-6.6827
ENSG00000106608	URGCP	-0.157353	-0.153151	-0.804882	0.421837	0.567755	-6.11605
ENSG00000106609	TMEM248	0.075052	2.0563	0.596755	0.551341	0.68458	-6.55362
ENSG00000106615	RHEB	0.14607	2.28671	1.10534	0.270329	0.413602	-6.14071
ENSG00000106617	PRKAG2	0.257408	2.17716	1.82707	0.069169	0.150808	-5.09114
ENSG00000106628	POLD2	-0.800912	0.0954527	-3.82694	0.00017309	0.00132702	0.425627
ENSG00000106635	BCL7B	0.0526544	1.58539	0.4403	0.660192	0.772303	-6.59766
ENSG00000106636	YKT6	0.146827	1.60709	1.12873	0.260354	0.402792	-6.05931
ENSG00000106638	TBL2	-0.146655	1.30307	-0.980959	0.327789	0.473479	-6.19691
ENSG00000106665	CLIP2	-0.350673	0.441842	-2.14876	0.0328464	0.0856756	-4.30355
ENSG00000106682	EIF4H	-0.110489	3.0612	-0.934722	0.351051	0.498446	-6.34632
ENSG00000106683	LIMK1	-0.129494	1.34978	-0.971336	0.332546	0.478593	-6.21279
ENSG00000106714	CNTNAP3	-0.161726	0.803684	-0.555855	0.578927	0.708531	-6.44612
ENSG00000106723	SPIN1	-0.275959	0.249505	-1.52441	0.128974	0.239869	-5.3771
ENSG00000106733	NMRK1	0.479127	0.845236	2.71165	0.00727344	0.0268365	-3.00834
ENSG00000106780	MEGF9	0.146222	1.88558	0.778927	0.436937	0.581794	-6.41237
ENSG00000106785	TRIM14	0.247408	1.4045	1.16263	0.246357	0.386784	-5.99577
ENSG00000106799	TGFBR1	0.29679	2.10367	1.56096	0.120103	0.227364	-5.5258
ENSG00000106803	SEC61B	-0.214644	2.41012	-1.18694	0.236648	0.376403	-6.06179
ENSG00000106829	TLE4	0.5995	3.51361	4.99783	1.25614e-06	2.43894e-05	4.89278
ENSG00000106853	PTGR1	-0.422862	0.462773	-2.19601	0.0292324	0.0784123	-4.22121
ENSG00000106868	SUSD1	-0.0675335	1.05448	-0.442932	0.65829	0.771188	-6.53426
ENSG00000106948	AKNA	0.305051	3.41712	2.13636	0.0338563	0.0877057	-4.54319
ENSG00000106952	TNFSF8	-0.0408702	0.944683	-0.155176	0.876838	0.925342	-6.59473
ENSG00000106976	DNM1	-0.604289	-0.362643	-1.66969	0.096533	0.192948	-5.07191
ENSG00000106991	ENG	-0.483965	2.24443	-2.38203	0.018148	0.0550049	-3.97559
ENSG00000106992	AK1	-0.505564	-0.751975	-1.96747	0.050502	0.11899	-4.46811
ENSG00000107020	PLGRKT	0.479134	0.569712	2.44836	0.0152062	0.0481628	-3.61759
ENSG00000107036	RIC1	0.573053	0.349441	3.64514	0.000340094	0.00227902	-0.154827
ENSG00000107077	KDM4C	0.177744	1.23038	1.24033	0.216297	0.351531	-5.89205
ENSG00000107099	DOCK8	0.314682	3.88436	2.41325	0.0167059	0.0517311	-3.94105
ENSG00000107104	KANK1	-0.123239	-0.204467	-0.599149	0.549747	0.683638	-6.2229
ENSG00000107140	TESK1	-0.108372	0.734657	-0.680746	0.496814	0.637632	-6.36091
ENSG00000107164	FUBP3	-0.358013	0.582948	-2.11583	0.0355876	0.0912779	-4.39541
ENSG00000107175	CREB3	-0.148679	0.295015	-0.968352	0.334029	0.480027	-6.0521
ENSG00000107201	DDX58	2.67618	2.06762	7.50995	1.88071e-12	3.49315e-10	17.8693
ENSG00000107223	EDF1	-0.524163	2.72999	-2.76428	0.00623404	0.0237492	-3.05379
ENSG00000107242	PIP5K1B	-0.254814	-0.214213	-1.44398	0.150298	0.268714	-5.4059
ENSG00000107249	GLIS3	-1.27056	-0.373942	-5.69862	4.24448e-08	1.39741e-06	8.27638
ENSG00000107262	BAG1	0.251802	2.61399	1.43834	0.15189	0.270723	-5.73673
ENSG00000107263	RAPGEF1	-0.156428	3.73498	-1.06394	0.288631	0.433057	-6.23082
ENSG00000107281	NPDC1	-0.215863	-0.677003	-0.844767	0.399243	0.546893	-5.98075
ENSG00000107290	SETX	0.57205	2.2641	3.88872	0.000136809	0.0010907	0.494425
ENSG00000107331	ABCA2	0.151095	1.87122	0.821332	0.412428	0.559216	-6.37563
ENSG00000107341	UBE2R2	0.141213	2.10226	1.02411	0.307013	0.452032	-6.21363
ENSG00000107371	EXOSC3	-0.2373	0.60674	-1.31001	0.191683	0.32047	-5.73344
ENSG00000107372	ZFAND5	-0.0750715	3.60718	-0.48094	0.631081	0.749646	-6.67407
ENSG00000107404	DVL1	-0.472964	0.557065	-2.56984	0.0108967	0.036963	-3.38074
ENSG00000107438	PDLIM1	-1.67932	0.795958	-6.60393	3.48464e-10	2.33843e-08	12.8241
ENSG00000107521	HPS1	0.307928	2.71617	2.54604	0.0116431	0.039116	-3.5982
ENSG00000107551	RASSF4	0.593726	1.71387	3.13927	0.00194812	0.00942836	-1.92101
ENSG00000107566	ERLIN1	-0.127731	0.777741	-0.616719	0.538116	0.674311	-6.40508
ENSG00000107581	EIF3A	-0.13204	2.17655	-0.986955	0.324849	0.470612	-6.25998
ENSG00000107614	TRDMT1	0.029576	0.376752	0.138198	0.890222	0.93399	-6.51369
ENSG00000107625	DDX50	0.0608942	0.27042	0.404072	0.686588	0.792168	-6.4139
ENSG00000107643	MAPK8	-0.174731	0.770935	-1.02525	0.306474	0.451366	-6.08102
ENSG00000107651	SEC23IP	-0.0767365	1.04288	-0.453833	0.650438	0.764983	-6.53165
ENSG00000107669	ATE1	-0.0616105	-0.0553086	-0.250959	0.802102	0.876987	-6.425
ENSG00000107736	CDH23	0.400389	1.00088	2.56767	0.010963	0.0371462	-3.40117
ENSG00000107738	VSIR	0.399761	4.32666	2.40158	0.0172329	0.0530181	-3.97215
ENSG00000107742	SPOCK2	0.804447	0.192693	2.94769	0.00357941	0.01536	-2.26466
ENSG00000107745	MICU1	0.536122	1.87699	4.1092	5.77459e-05	0.000541669	1.32515
ENSG00000107758	PPP3CB	0.189456	0.77906	1.27544	0.203623	0.33497	-5.7712
ENSG00000107771	CCSER2	0.284001	1.07594	2.04258	0.0423969	0.103871	-4.58586
ENSG00000107796	ACTA2	-0.0578456	0.0374124	-0.231517	0.817148	0.887007	-6.41781
ENSG00000107798	LIPA	0.40284	2.88954	1.37361	0.17109	0.294144	-5.83268
ENSG00000107819	SFXN3	-0.347293	1.41471	-2.2268	0.0270677	0.0743455	-4.26144
ENSG00000107829	FBXW4	-0.00593304	0.753846	-0.0342248	0.972732	0.98521	-6.58844
ENSG00000107854	TNKS2	0.725799	1.09341	4.36208	2.05533e-05	0.000238032	2.37219
ENSG00000107862	GBF1	-0.109463	0.579551	-0.799685	0.424835	0.570698	-6.24746
ENSG00000107863	ARHGAP21	-0.229358	1.24053	-1.35842	0.175848	0.300086	-5.75625
ENSG00000107874	CUEDC2	0.161111	0.462885	0.993681	0.32157	0.467238	-6.0439
ENSG00000107897	ACBD5	0.279499	0.0512295	1.76088	0.0797759	0.167982	-4.92122
ENSG00000107902	LHPP	-0.83675	-0.217295	-4.00194	8.82485e-05	0.000762702	1.0873
ENSG00000107929	LARP4B	0.46019	2.74963	3.60946	0.000387165	0.00253745	-0.501127
ENSG00000107937	GTPBP4	-0.088209	0.257014	-0.462261	0.644393	0.760188	-6.40599
ENSG00000107938	EDRF1	0.0729811	-0.0626449	0.423221	0.672586	0.782246	-6.33373
ENSG00000107949	BCCIP	-0.295078	-0.0886705	-1.74	0.0833854	0.174203	-4.97847
ENSG00000107959	PITRM1	-0.404844	0.645805	-2.48814	0.0136523	0.0444717	-3.58919
ENSG00000107968	MAP3K8	0.311377	3.53962	1.94836	0.0527612	0.123068	-4.919
ENSG00000108010	GLRX3	-0.139329	2.05526	-0.813421	0.416937	0.563549	-6.41182
ENSG00000108021	TASOR2	0.141757	1.06536	0.839065	0.402427	0.549835	-6.27769
ENSG00000108039	XPNPEP1	-0.510553	1.58789	-3.3259	0.00104727	0.00566759	-1.3797
ENSG00000108061	SHOC2	0.50913	3.02636	3.72123	0.000257135	0.00181842	-0.128747
ENSG00000108064	TFAM	-0.021343	0.110436	-0.11527	0.908346	0.945495	-6.46187
ENSG00000108094	CUL2	0.590655	0.249973	3.09282	0.00226377	0.010614	-1.8784
ENSG00000108100	CCNY	0.0519	1.67232	0.335142	0.737866	0.830942	-6.6439
ENSG00000108106	UBE2S	0.214946	1.69479	0.973318	0.331562	0.477521	-6.23152
ENSG00000108107	RPL28	-0.0651595	5.45095	-0.375698	0.707537	0.807348	-6.72495
ENSG00000108175	ZMIZ1	0.228795	3.25658	1.40513	0.161522	0.28269	-5.80439
ENSG00000108179	PPIF	0.501058	5.64083	2.64975	0.00869443	0.0307649	-3.36969
ENSG00000108187	PBLD	0.199424	0.190879	1.122	0.2632	0.405785	-5.85768
ENSG00000108219	TSPAN14	0.273978	3.80764	1.92713	0.0553695	0.127582	-4.96294
ENSG00000108244	KRT23	0.0278763	2.23982	0.125171	0.900513	0.940409	-6.7294
ENSG00000108256	NUFIP2	0.193816	2.80763	1.14462	0.253724	0.395387	-6.11742
ENSG00000108262	GIT1	-0.234928	0.68184	-1.47035	0.143028	0.259629	-5.53158
ENSG00000108298	RPL19	-0.394885	4.57025	-2.15784	0.0321231	0.0843479	-4.5121
ENSG00000108312	UBTF	-0.251977	1.58953	-1.98143	0.0489035	0.116098	-4.78031
ENSG00000108342	CSF3	0.561041	0.147965	1.5557	0.121348	0.228973	-5.25383
ENSG00000108344	PSMD3	-0.16813	1.36891	-1.11704	0.265309	0.408334	-6.0607
ENSG00000108349	CASC3	-0.0381589	3.00756	-0.325631	0.745042	0.836663	-6.72438
ENSG00000108352	RAPGEFL1	-0.451445	0.475823	-2.64746	0.00875144	0.0309555	-3.16084
ENSG00000108387	SEPTIN4	-0.0533568	0.830082	-0.243684	0.807724	0.880989	-6.58049
ENSG00000108389	MTMR4	0.1679	0.97842	0.973247	0.331598	0.477521	-6.14726
ENSG00000108395	TRIM37	0.0871108	-0.233588	0.381462	0.703262	0.803868	-6.32576
ENSG00000108405	P2RX1	0.11987	1.6714	0.576856	0.564681	0.696129	-6.52953
ENSG00000108406	DHX40	0.147133	0.703649	0.861299	0.390097	0.538359	-6.2057
ENSG00000108423	TUBD1	-0.156262	-0.332839	-0.717778	0.473726	0.617254	-6.12898
ENSG00000108424	KPNB1	0.569527	4.01438	4.32216	2.4268e-05	0.000269633	2.07093
ENSG00000108433	GOSR2	-0.0510365	1.03676	-0.387432	0.698845	0.80059	-6.55508
ENSG00000108439	PNPO	-0.677088	-0.286103	-3.3827	0.000862308	0.00487848	-0.993159
ENSG00000108443	RPS6KB1	0.14255	1.09312	0.860315	0.390638	0.538664	-6.269
ENSG00000108465	CDK5RAP3	0.0777869	2.42749	0.608975	0.543227	0.678324	-6.56894
ENSG00000108468	CBX1	-0.0182699	0.273981	-0.121927	0.903079	0.941731	-6.49394
ENSG00000108469	RECQL5	-0.168814	0.7793	-0.892416	0.373235	0.521024	-6.21298
ENSG00000108474	PIGL	-0.692392	1.09283	-2.46996	0.0143439	0.0461442	-3.69996
ENSG00000108479	GALK1	0.0819752	0.636789	0.50729	0.612506	0.734053	-6.43366
ENSG00000108509	CAMTA2	-0.16492	2.42365	-1.09582	0.274465	0.4185	-6.16488
[truncated: 7,845 more rows]

## Sheet: C (viral LRTI v IPC)
ENSEMBL_ID	gene_symbol	logFC	AveExpr	t	P.Value	adj.P.Val	B
ENSG00000000419	DPM1	0.0346641	1.08533	0.261513	0.793934	0.882507	-6.2631
ENSG00000000938	FGR	0.222226	5.74597	1.64484	0.101388	0.236732	-5.11289
ENSG00000001036	FUCA2	-0.291023	0.947886	-2.54159	0.011702	0.057523	-3.20821
ENSG00000001084	GCLC	-0.263222	0.930105	-1.47806	0.140777	0.295187	-5.24198
ENSG00000001167	NFYA	0.212372	1.23546	1.58606	0.114118	0.258189	-5.08281
ENSG00000001626	CFTR	-0.284748	1.81792	-0.840409	0.401563	0.585408	-6.04128
ENSG00000001629	ANKIB1	0.358107	1.33349	2.35613	0.0193181	0.0796012	-3.63817
ENSG00000001630	CYP51A1	0.0940349	0.497528	0.617226	0.537705	0.701453	-6.00979
ENSG00000001631	KRIT1	-0.0624924	0.795153	-0.412652	0.680252	0.806503	-6.18172
ENSG00000002016	RAD52	-0.0745242	-0.403484	-0.405844	0.685239	0.810334	-5.93897
ENSG00000002330	BAD	-0.235262	0.594992	-1.18003	0.239226	0.418307	-5.57004
ENSG00000002549	LAP3	0.796299	4.17581	3.34879	0.000950246	0.0105104	-1.08813
ENSG00000002586	CD99	-0.286842	3.28555	-2.21545	0.0277225	0.101488	-4.06738
ENSG00000002587	HS3ST1	-0.0691928	0.0177386	-0.283099	0.777359	0.871987	-6.07636
ENSG00000002822	MAD1L1	-0.327679	1.94087	-2.14844	0.0327378	0.113716	-4.16816
ENSG00000002834	LASP1	0.00608642	3.79047	0.0691651	0.944919	0.970141	-6.44617
ENSG00000002919	SNX11	0.13255	1.74252	0.990773	0.322851	0.508748	-5.88264
ENSG00000002933	TMEM176A	0.424809	1.88809	2.20314	0.0285908	0.10353	-4.02419
ENSG00000003056	M6PR	0.207033	3.49846	1.63399	0.103647	0.24058	-5.14558
ENSG00000003147	ICA1	-0.485494	0.00443754	-2.49158	0.0134334	0.0631207	-3.2106
ENSG00000003393	ALS2	-0.267942	0.268079	-1.74326	0.0826424	0.208331	-4.73166
ENSG00000003400	CASP10	0.551308	1.79688	3.09202	0.00223697	0.0188534	-1.7857
ENSG00000003402	CFLAR	0.371145	6.44652	3.83591	0.000162149	0.003052	0.550556
ENSG00000003436	TFPI	-0.64503	0.252252	-4.11954	5.32079e-05	0.00134517	1.67028
ENSG00000003509	NDUFAF7	0.110942	-0.154116	0.689691	0.491093	0.663144	-5.82641
ENSG00000003756	RBM5	0.104913	3.77704	1.20382	0.229915	0.407358	-5.74054
ENSG00000004059	ARF5	0.0658549	2.83532	0.616566	0.538139	0.701741	-6.24764
ENSG00000004142	POLDIP2	0.109634	0.536417	0.820214	0.412955	0.595491	-5.8718
ENSG00000004399	PLXND1	-0.289501	2.6773	-1.98056	0.0488486	0.148163	-4.5311
ENSG00000004455	AK2	0.0210655	2.3495	0.179204	0.857937	0.921156	-6.39774
ENSG00000004468	CD38	0.970924	1.72553	4.16793	4.37301e-05	0.00116661	1.81781
ENSG00000004478	FKBP4	-0.165595	1.47482	-0.826963	0.409127	0.592328	-6.02925
ENSG00000004487	KDM1A	-0.279383	-0.165168	-2.02242	0.0443066	0.139213	-4.1655
ENSG00000004534	RBM6	-0.112708	1.92156	-1.14276	0.254343	0.435345	-5.75585
ENSG00000004660	CAMKK1	-0.0701072	-0.0464557	-0.419335	0.675368	0.803132	-6.01185
ENSG00000004700	RECQL	0.197729	0.373839	1.25054	0.212391	0.386537	-5.40165
ENSG00000004766	VPS50	-0.338997	0.149155	-1.96541	0.050586	0.151727	-4.32247
ENSG00000004779	NDUFAB1	-0.266274	0.634498	-1.25529	0.210666	0.384677	-5.49783
ENSG00000004838	ZMYND10	-0.742673	-0.00720954	-2.79349	0.00565968	0.0355318	-2.4949
ENSG00000004864	SLC25A13	0.248054	2.6363	1.17331	0.2419	0.421204	-5.75131
ENSG00000004866	ST7	-0.93115	-0.427438	-4.54108	9.0863e-06	0.00037269	3.30289
ENSG00000004897	CDC27	0.0281383	1.93869	0.252101	0.801191	0.886769	-6.35908
ENSG00000004975	DVL2	-0.0862725	1.19835	-0.59723	0.55095	0.711891	-6.15158
ENSG00000005001	PRSS22	0.136972	0.256313	0.477353	0.63357	0.775036	-6.04439
ENSG00000005007	UPF1	0.156005	2.44155	1.5462	0.123449	0.271136	-5.25359
ENSG00000005020	SKAP2	0.257429	3.41925	1.82309	0.0696057	0.186906	-4.82813
ENSG00000005022	SLC25A5	-0.257078	2.3791	-1.78084	0.0762763	0.197774	-4.88226
ENSG00000005059	MCUB	0.0665302	1.29663	0.374093	0.708685	0.825401	-6.25073
ENSG00000005075	POLR2J	0.0821652	1.48767	0.517285	0.605461	0.753783	-6.21579
ENSG00000005156	LIG3	-0.225874	1.15463	-1.56602	0.118736	0.2645	-5.13764
ENSG00000005175	RPAP3	0.208658	0.370853	1.08102	0.280837	0.465648	-5.59671
ENSG00000005187	ACSM3	0.218157	0.97903	1.04317	0.297981	0.483012	-5.73778
ENSG00000005194	CIAPIN1	-0.319452	0.0780531	-1.96378	0.0507762	0.152112	-4.32359
ENSG00000005206	SPPL2B	-0.358396	1.00067	-2.10854	0.0360806	0.121056	-4.17756
ENSG00000005238	FAM214B	-0.0491318	1.83303	-0.341709	0.732886	0.840561	-6.32618
ENSG00000005302	MSL3	0.528066	2.9742	3.73392	0.000238433	0.00393815	0.189642
ENSG00000005339	CREBBP	0.174094	4.56293	0.965354	0.335395	0.520742	-5.9912
ENSG00000005379	TSPOAP1	0.000602957	1.52722	0.00283718	0.997739	0.998753	-6.35366
ENSG00000005448	WDR54	-0.887449	-0.795739	-4.2517	3.10075e-05	0.000930604	2.19067
ENSG00000005483	KMT2E	0.265606	3.86328	2.69113	0.00765116	0.0439428	-2.95713
ENSG00000005486	RHBDD2	-0.0455988	2.88334	-0.348925	0.727469	0.837486	-6.37636
ENSG00000005700	IBTK	-0.135771	0.188723	-1.06321	0.288815	0.474007	-5.61562
ENSG00000005801	ZNF195	-0.502171	0.0938698	-2.849	0.00478877	0.031766	-2.34386
ENSG00000005810	MYCBP2	-0.00696109	2.16727	-0.0582685	0.953586	0.973867	-6.40321
ENSG00000005812	FBXL3	0.335265	1.5761	2.44847	0.0151048	0.0677721	-3.45705
ENSG00000005844	ITGAL	0.30673	3.17658	2.41921	0.0163422	0.0715306	-3.60944
ENSG00000005884	ITGA3	-0.217768	-0.240795	-0.979304	0.328473	0.51427	-5.63033
ENSG00000005889	ZFX	0.282307	2.34633	2.35646	0.0193012	0.0795936	-3.72413
ENSG00000005893	LAMP2	0.38817	3.43727	3.00352	0.00296797	0.022933	-2.1125
ENSG00000006007	GDE1	-0.215382	0.728025	-1.49135	0.137258	0.290324	-5.18756
ENSG00000006015	REX1BD	-0.364897	0.748314	-2.46592	0.0144074	0.0657014	-3.36866
ENSG00000006118	TMEM132A	-0.0827605	0.928253	-0.489239	0.625145	0.767912	-6.17419
ENSG00000006125	AP2B1	-0.0685829	3.26636	-0.621445	0.534931	0.699224	-6.25561
ENSG00000006194	ZNF263	-0.192747	0.0939896	-1.52475	0.128715	0.278845	-5.03837
ENSG00000006282	SPATA20	-0.416663	0.197946	-3.12596	0.00200374	0.0177249	-1.58606
ENSG00000006327	TNFRSF12A	-0.517796	0.760664	-2.13319	0.033983	0.116277	-4.10499
ENSG00000006451	RALA	0.0404929	1.912	0.272158	0.785748	0.877073	-6.34774
ENSG00000006453	BAIAP2L1	-0.0399516	0.769852	-0.273231	0.784924	0.876749	-6.22083
ENSG00000006459	KDM7A	0.450563	1.1723	3.17313	0.00171674	0.015958	-1.49731
ENSG00000006530	AGK	-0.0478459	1.32721	-0.388579	0.697952	0.818744	-6.25938
ENSG00000006534	ALDH3B1	-0.186969	1.6397	-1.32919	0.18512	0.35316	-5.51642
ENSG00000006576	PHTF2	-0.052685	-0.00461937	-0.340039	0.734142	0.84151	-6.04181
ENSG00000006607	FARP2	-0.357706	0.690781	-1.86684	0.0632139	0.175438	-4.60126
ENSG00000006634	DBF4	0.454097	-0.163094	2.21931	0.0274557	0.101037	-3.69863
ENSG00000006652	IFRD1	0.202147	4.23914	1.29445	0.196824	0.366889	-5.63062
ENSG00000006712	PAF1	0.313507	2.72494	2.65	0.00861537	0.0474593	-3.04239
ENSG00000006715	VPS41	-0.00772775	2.03448	-0.0599296	0.952264	0.973325	-6.3963
ENSG00000006744	ELAC2	-0.183103	0.70071	-1.21917	0.224046	0.400963	-5.54381
ENSG00000006747	SCIN	-0.158455	0.105945	-0.779557	0.436464	0.61564	-5.85485
ENSG00000006756	ARSD	-0.218623	0.34335	-1.75067	0.0813537	0.206062	-4.73211
ENSG00000006831	ADIPOR2	-0.109082	1.58362	-0.841757	0.40081	0.584789	-6.02177
ENSG00000006837	CDKL3	0.366987	-0.142608	1.79337	0.074246	0.194849	-4.52614
ENSG00000007047	MARK4	-0.178401	1.63069	-1.51834	0.130321	0.280963	-5.25133
ENSG00000007062	PROM1	-0.701914	-0.682008	-2.80501	0.00546794	0.0347016	-2.36928
ENSG00000007080	CCDC124	-0.350833	1.12648	-2.30549	0.0220423	0.0870878	-3.77462
ENSG00000007129	CEACAM21	-0.285617	-0.350491	-1.56056	0.120021	0.26628	-4.91442
ENSG00000007168	PAFAH1B1	0.199906	3.49986	2.34374	0.0199557	0.0812422	-3.78766
ENSG00000007174	DNAH9	-0.902642	-0.644125	-4.02754	7.68904e-05	0.00176025	1.37322
ENSG00000007202	KIAA0100	-0.16697	2.16586	-1.53076	0.12722	0.276642	-5.27002
ENSG00000007237	AC005747.1	0.528187	3.73614	3.27666	0.00121509	0.0125017	-1.31009
ENSG00000007264	MATK	-0.702374	0.0577646	-3.61696	0.000367348	0.00527909	-0.0732953
ENSG00000007341	ST7L	0.2108	0.984877	1.49855	0.135381	0.287999	-5.17543
ENSG00000007392	LUC7L	-0.19008	1.04128	-1.71436	0.0878286	0.216092	-4.88932
ENSG00000007516	BAIAP3	-0.552488	0.123086	-2.60863	0.0096944	0.0508679	-2.95356
ENSG00000007520	TSR3	-0.285613	0.605869	-1.8423	0.066736	0.181729	-4.62076
ENSG00000007541	PIGQ	-0.535713	0.40071	-3.06001	0.00247969	0.0201694	-1.80472
ENSG00000007545	CRAMP1	0.0317585	-0.0136912	0.149492	0.881298	0.936171	-6.07684
ENSG00000007923	DNAJC11	-0.3752	0.298458	-2.12816	0.0344022	0.117132	-4.04058
ENSG00000007944	MYLIP	0.669352	1.26338	4.00304	8.47164e-05	0.00189965	1.2246
ENSG00000008018	PSMB1	0.225851	2.37082	1.5881	0.113655	0.257496	-5.18387
ENSG00000008083	JARID2	0.0874731	1.79137	0.72541	0.468948	0.643749	-6.11488
ENSG00000008086	CDKL5	-0.359512	0.750469	-1.89105	0.0598919	0.169317	-4.55488
ENSG00000008128	CDK11A	0.0961682	2.2083	0.685854	0.493505	0.665443	-6.17378
ENSG00000008130	NADK	0.552261	5.73253	3.87176	0.000141323	0.00281048	0.666358
ENSG00000008226	DLEC1	-0.634809	-0.412058	-3.56643	0.000441304	0.00599199	-0.192519
ENSG00000008256	CYTH3	-0.261551	-0.0521907	-1.46085	0.145439	0.301665	-5.10696
ENSG00000008282	SYPL1	-0.0727275	1.10548	-0.577289	0.564316	0.722428	-6.14392
ENSG00000008283	CYB561	-0.605157	0.031007	-2.9147	0.00391674	0.0278386	-2.17132
ENSG00000008294	SPAG9	-0.0475126	4.37591	-0.392716	0.694898	0.816945	-6.3716
ENSG00000008323	PLEKHG6	0.0724341	1.83339	0.389649	0.697162	0.818176	-6.30394
ENSG00000008382	MPND	-0.181091	0.198982	-0.969387	0.333384	0.519011	-5.71806
ENSG00000008394	MGST1	-0.42411	1.51519	-2.1761	0.0305801	0.108519	-4.08744
ENSG00000008438	PGLYRP1	0.339429	1.02987	1.26342	0.207735	0.380526	-5.46758
ENSG00000008513	ST3GAL1	0.0113954	3.28832	0.093407	0.925663	0.959287	-6.43972
ENSG00000008516	MMP25	0.803923	4.70285	3.40549	0.000780946	0.00915195	-0.910107
ENSG00000008517	IL32	0.393861	2.26101	1.72753	0.0854332	0.212428	-4.94654
ENSG00000008710	PKD1	-0.532764	1.24318	-3.00356	0.00296762	0.022933	-2.04537
ENSG00000008838	MED24	-0.118574	1.78707	-0.869971	0.385235	0.569579	-6.01302
ENSG00000008869	HEATR5B	0.313206	0.998685	1.85918	0.0642963	0.177434	-4.59969
ENSG00000008952	SEC62	-0.119128	3.48411	-0.971703	0.332233	0.517976	-5.98558
ENSG00000008988	RPS20	-0.0939206	4.62315	-0.615901	0.538577	0.702126	-6.25876
ENSG00000009307	CSDE1	0.0479209	3.80064	0.451208	0.65227	0.788052	-6.34867
ENSG00000009335	UBE3C	-0.150783	1.09162	-1.36842	0.172534	0.337098	-5.40525
ENSG00000009413	REV3L	-0.0583523	1.36391	-0.347464	0.728565	0.838168	-6.27761
ENSG00000009780	FAM76A	-0.276579	-0.0160256	-1.57686	0.11622	0.261263	-4.94259
ENSG00000009790	TRAF3IP3	0.253879	2.91225	1.50381	0.134022	0.28637	-5.33118
ENSG00000009830	POMT2	-0.0473379	-0.0324217	-0.220304	0.825832	0.903007	-6.0871
ENSG00000009844	VTA1	0.397099	0.690301	2.3418	0.0200571	0.0815537	-3.58651
ENSG00000009954	BAZ1B	-0.0669548	0.286556	-0.54959	0.583141	0.736993	-6.02037
ENSG00000010017	RANBP9	0.158195	1.33034	1.30784	0.192252	0.36117	-5.48921
ENSG00000010030	ETV7	1.44038	1.19126	4.65407	5.53432e-06	0.000255774	3.75316
ENSG00000010219	DYRK4	-0.725242	-0.430316	-3.40234	0.000789572	0.00922011	-0.711323
ENSG00000010244	ZNF207	0.381264	3.77818	3.6082	0.000379275	0.00538757	-0.250305
ENSG00000010256	UQCRC1	-0.0361477	2.58611	-0.299541	0.764801	0.863086	-6.3831
ENSG00000010270	STARD3NL	-0.00622876	1.49949	-0.0616465	0.950899	0.973117	-6.34788
ENSG00000010278	CD9	-0.427361	2.62104	-1.98464	0.0483889	0.147356	-4.52272
ENSG00000010292	NCAPD2	-0.00707522	0.51478	-0.0515226	0.958954	0.975806	-6.20409
ENSG00000010295	IFFO1	-0.0607463	0.282971	-0.528939	0.597365	0.747389	-6.03314
ENSG00000010310	GIPR	-0.434515	-0.439809	-2.21849	0.027512	0.101131	-3.74068
ENSG00000010322	NISCH	0.0455191	1.40156	0.450554	0.652741	0.788415	-6.23832
ENSG00000010327	STAB1	0.236102	2.69263	1.41726	0.157779	0.318666	-5.44679
ENSG00000010361	FUZ	-0.419253	-0.0693941	-2.0249	0.0440492	0.138625	-4.17011
ENSG00000010404	IDS	-0.103999	3.30517	-1.03018	0.304021	0.490379	-5.92663
ENSG00000010539	ZNF200	0.425148	1.49725	2.74499	0.00653572	0.0393743	-2.71811
ENSG00000010610	CD4	-0.305439	2.0175	-2.34273	0.0200084	0.0814045	-3.75609
ENSG00000010626	LRRC23	-0.731597	0.198197	-3.39345	0.000814363	0.00937098	-0.799405
ENSG00000010671	BTK	0.318588	2.01271	2.4376	0.0155546	0.0691227	-3.51906
ENSG00000010803	SCMH1	-0.298188	-0.180538	-1.79548	0.0739076	0.194123	-4.57337
ENSG00000010810	FYN	0.245978	2.20529	1.49875	0.135327	0.287999	-5.30248
ENSG00000010818	HIVEP2	0.379706	2.1291	2.4039	0.0170245	0.0735038	-3.60261
ENSG00000011007	ELOA	-0.115252	0.334042	-0.838491	0.402637	0.586499	-5.84241
ENSG00000011009	LYPLA2	0.0662361	1.91355	0.572421	0.567603	0.725365	-6.22297
ENSG00000011021	CLCN6	0.135817	1.2434	0.886465	0.376305	0.560755	-5.93079
ENSG00000011114	BTBD7	0.0345367	0.80896	0.297833	0.766103	0.863628	-6.21325
ENSG00000011132	APBA3	0.0567427	0.882486	0.375504	0.707637	0.824523	-6.20142
ENSG00000011198	ABHD5	-0.11608	2.3443	-0.722435	0.470771	0.645261	-6.16255
ENSG00000011243	AKAP8L	-0.182332	2.05991	-1.73072	0.0848602	0.211217	-4.94993
ENSG00000011260	UTP18	0.302411	1.54876	2.25413	0.0251428	0.0956825	-3.89247
ENSG00000011275	RNF216	-0.217514	0.837003	-1.69219	0.0919814	0.222029	-4.89755
ENSG00000011295	TTC19	-0.257005	0.776902	-1.80905	0.0717672	0.190206	-4.70278
ENSG00000011304	PTBP1	-0.129341	3.12444	-1.07802	0.282168	0.466913	-5.87505
ENSG00000011405	PIK3C2A	-0.0476755	0.324897	-0.298874	0.76531	0.863462	-6.13263
ENSG00000011422	PLAUR	0.215103	7.39562	1.40902	0.160197	0.321576	-5.42732
ENSG00000011451	WIZ	-0.232033	0.164664	-1.80914	0.0717521	0.190206	-4.61018
ENSG00000011454	RABGAP1	0.0222421	1.54118	0.173155	0.862684	0.923474	-6.33644
ENSG00000011485	PPP5C	-0.294797	0.296129	-1.71025	0.0885867	0.217089	-4.79643
ENSG00000011523	CEP68	0.277072	1.35528	1.96885	0.0501877	0.151131	-4.44523
ENSG00000011566	MAP4K3	-0.367955	0.907168	-2.13083	0.0341792	0.116624	-4.11648
ENSG00000011600	TYROBP	0.201635	6.87012	1.99652	0.0470723	0.144909	-4.47331
ENSG00000011638	TMEM159	0.108442	0.324669	0.721448	0.471377	0.645553	-5.91486
ENSG00000012048	BRCA1	0.0116366	0.476278	0.0666928	0.946885	0.971356	-6.19283
ENSG00000012061	ERCC1	-0.435244	1.82679	-3.43064	0.000715288	0.00859743	-0.794702
ENSG00000012124	CD22	0.444947	2.58706	1.78068	0.0763031	0.197774	-4.87551
ENSG00000012171	SEMA3B	0.21866	0.027181	1.28084	0.201557	0.372676	-5.30502
ENSG00000012211	PRICKLE3	-0.0995217	-0.103488	-0.648452	0.517348	0.685614	-5.90342
ENSG00000012223	LTF	0.287759	1.16444	1.2923	0.197567	0.367785	-5.47313
ENSG00000012232	EXTL3	0.0834369	1.54215	0.571239	0.568403	0.725593	-6.18739
ENSG00000012660	ELOVL5	0.378948	3.25188	3.49799	0.000563947	0.00715127	-0.60789
ENSG00000012779	ALOX5	0.259262	5.53543	1.8107	0.0715095	0.189843	-4.8407
ENSG00000012822	CALCOCO1	-0.314712	2.0595	-2.95898	0.00341371	0.0251908	-2.21125
ENSG00000012983	MAP4K5	-0.568048	0.671004	-3.3235	0.00103626	0.0111137	-1.05303
ENSG00000013275	PSMC4	-0.0908232	1.81031	-0.83254	0.405979	0.589189	-6.04734
ENSG00000013288	MAN2B2	-0.165978	0.787798	-1.51012	0.132405	0.284026	-5.16926
ENSG00000013306	SLC25A39	-0.157822	1.47241	-1.14396	0.253846	0.435056	-5.72221
ENSG00000013364	MVP	0.0895153	4.31444	1.07066	0.285462	0.470401	-5.88807
ENSG00000013374	NUB1	0.696628	3.14874	3.43503	0.000704361	0.00850765	-0.80364
ENSG00000013375	PGM3	-0.188197	0.00628987	-0.861132	0.390074	0.574748	-5.77092
ENSG00000013441	CLK1	0.315703	3.56779	2.69999	0.00745657	0.0432543	-2.93221
ENSG00000013561	RNF14	-0.0244295	0.712784	-0.185949	0.852651	0.918024	-6.22593
ENSG00000013563	DNASE1L1	-0.000802306	1.38462	-0.00531116	0.995767	0.997591	-6.3285
ENSG00000013573	DDX11	-0.569396	0.893735	-2.39238	0.0175544	0.0749053	-3.55996
ENSG00000013583	HEBP1	-0.116698	0.349882	-0.765326	0.444872	0.623775	-5.91442
ENSG00000013588	GPRC5A	-0.140174	0.928792	-0.503286	0.615251	0.761828	-6.16781
ENSG00000013725	CD6	-0.193155	1.13115	-1.24588	0.214094	0.388502	-5.56968
ENSG00000013810	TACC3	0.14473	2.03729	1.11205	0.267294	0.450092	-5.78435
ENSG00000014164	ZC3H3	0.212801	1.95119	1.4886	0.13798	0.291413	-5.30451
ENSG00000014216	CAPN1	-0.121092	2.93401	-1.31625	0.189418	0.357895	-5.59319
ENSG00000014257	ACPP	0.580125	0.511838	2.91884	0.00386702	0.0276248	-2.12814
ENSG00000014824	SLC30A9	0.0400485	0.489281	0.298466	0.765621	0.863628	-6.14438
ENSG00000014919	COX15	0.0536913	0.485194	0.401379	0.688519	0.812294	-6.11621
ENSG00000015133	CCDC88C	-0.381153	1.35376	-2.52165	0.0123668	0.0597491	-3.29712
ENSG00000015153	YAF2	0.128161	1.02857	0.786297	0.432514	0.612401	-5.97789
ENSG00000015171	ZMYND11	-0.2813	-0.0150978	-1.83567	0.0677149	0.183632	-4.52907
ENSG00000015285	WAS	0.485993	4.1043	3.81621	0.000174793	0.00321019	0.461046
ENSG00000015475	BID	0.171609	4.45358	1.2308	0.219673	0.394887	-5.70798
ENSG00000015479	MATR3	-0.127928	2.38188	-1.11855	0.264516	0.446638	-5.81
ENSG00000015568	RGPD5	-0.545442	2.05255	-2.52401	0.0122865	0.0594749	-3.34383
ENSG00000015676	NUDCD3	-0.191045	0.663278	-1.42382	0.155872	0.316111	-5.27292
ENSG00000016864	GLT8D1	-0.20174	0.130023	-1.35363	0.177201	0.343109	-5.27332
ENSG00000017260	ATP2C1	0.0228916	2.16859	0.182198	0.85559	0.919642	-6.38795
ENSG00000017483	SLC38A5	0.530059	-0.313856	2.07026	0.0395599	0.128934	-3.99111
ENSG00000017797	RALBP1	-0.024067	1.6134	-0.261234	0.794149	0.882647	-6.32775
ENSG00000018189	RUFY3	-0.434034	1.58865	-3.24489	0.00135226	0.013453	-1.36016
ENSG00000018280	SLC11A1	-0.212229	6.301	-1.39065	0.165694	0.328187	-5.46983
ENSG00000018510	AGPS	-0.24589	0.825819	-1.88997	0.0600359	0.169582	-4.56523
ENSG00000019144	PHLDB1	-0.537129	0.385013	-2.86719	0.00453116	0.0306351	-2.33769
ENSG00000019169	MARCO	-1.28214	2.85925	-5.56907	7.21101e-08	1.07553e-05	7.77
ENSG00000019582	CD74	-0.22735	7.05752	-1.15498	0.249314	0.430118	-5.74418
ENSG00000020577	SAMD4A	-0.183593	0.519126	-0.854925	0.393494	0.577802	-5.87099
ENSG00000020633	RUNX3	0.559822	1.86948	3.34704	0.000955979	0.0105579	-1.02933
ENSG00000020922	MRE11	0.207881	0.124685	1.50867	0.132773	0.284568	-5.02188
ENSG00000021355	SERPINB1	0.322337	5.94078	2.83293	0.00502752	0.0327131	-2.56915
ENSG00000021574	SPAST	0.164403	1.41425	1.61544	0.107605	0.247683	-5.06644
ENSG00000021762	OSBPL5	0.31678	0.388823	1.5564	0.121006	0.268103	-5.00806
ENSG00000022277	RTF2	0.186266	3.49736	1.78828	0.0750641	0.196003	-4.89027
ENSG00000022556	NLRP2	0.128854	0.273886	0.615272	0.538991	0.702432	-5.96791
ENSG00000022567	SLC45A4	0.119171	2.67333	0.810721	0.418375	0.600275	-6.1054
ENSG00000022840	RNF10	0.132261	4.54876	1.27284	0.204376	0.375911	-5.65604
ENSG00000023041	ZDHHC6	0.1619	1.02882	1.19182	0.234576	0.412836	-5.58621
ENSG00000023171	GRAMD1B	0.353125	1.13332	1.98521	0.0483256	0.147356	-4.38342
ENSG00000023191	RNH1	-0.294648	2.97863	-2.11819	0.0352469	0.11907	-4.26624
ENSG00000023228	NDUFS1	-0.0229103	1.0077	-0.186204	0.852451	0.91791	-6.27088
ENSG00000023287	RB1CC1	-0.00279677	1.76843	-0.0255611	0.97963	0.988365	-6.37507
ENSG00000023318	ERP44	0.372088	1.0228	2.73392	0.00675221	0.0403374	-2.70141
ENSG00000023330	ALAS1	0.101687	1.98862	0.771037	0.441487	0.620768	-6.09996
ENSG00000023445	BIRC3	0.423262	2.15815	2.9782	0.00321427	0.0242091	-2.14015
ENSG00000023608	SNAPC1	0.19604	0.275922	1.13334	0.258268	0.439936	-5.52685
ENSG00000023697	DERA	0.00967653	0.214345	0.0615741	0.950956	0.973117	-6.13186
ENSG00000023734	STRAP	-0.0300506	1.49858	-0.257104	0.797331	0.884586	-6.31672
ENSG00000023892	DEF6	0.444569	1.85345	3.20845	0.00152727	0.0145824	-1.45164
ENSG00000023902	PLEKHO1	0.237624	2.59262	1.52176	0.129462	0.279787	-5.29439
ENSG00000023909	GCLM	0.344652	1.86635	2.12032	0.0350648	0.118863	-4.19817
ENSG00000024048	UBR2	0.340448	1.54126	3.06302	0.00245592	0.0200941	-1.85904
ENSG00000024862	CCDC28A	0.516105	0.443201	2.99392	0.00305925	0.0233814	-1.91184
ENSG00000025039	RRAGD	-0.0584536	1.57892	-0.454907	0.649611	0.786178	-6.25935
ENSG00000025293	PHF20	-0.138803	2.4952	-1.15705	0.248467	0.428957	-5.7726
ENSG00000025434	NR1H3	-0.100902	2.35134	-0.536996	0.591796	0.743078	-6.2789
ENSG00000025708	TYMP	0.284204	6.50228	2.42597	0.0160484	0.0707165	-3.57348
ENSG00000025770	NCAPH2	-0.409249	0.931797	-3.11223	0.00209521	0.0181327	-1.70505
ENSG00000025796	SEC63	-0.00276062	1.82786	-0.0202972	0.983824	0.99087	-6.3805
ENSG00000025800	KPNA6	0.12011	0.729462	0.966407	0.334869	0.520356	-5.77631
ENSG00000026025	VIM	-0.191751	7.44589	-1.36449	0.173764	0.338653	-5.48079
ENSG00000026103	FAS	0.800663	2.6133	4.45788	1.30129e-05	0.000490909	2.89626
ENSG00000026297	RNASET2	0.247408	3.89976	1.90669	0.0578241	0.165954	-4.68156
ENSG00000026508	CD44	0.0754004	7.49604	0.603496	0.546782	0.708692	-6.21042
ENSG00000026652	AGPAT4	-0.0556317	1.04925	-0.377533	0.706131	0.824006	-6.2303
ENSG00000026751	SLAMF7	1.25218	4.42267	5.32047	2.4791e-07	2.65264e-05	6.60073
ENSG00000026950	BTN3A1	1.0459	2.08122	5.10074	7.13833e-07	6.00596e-05	5.63149
ENSG00000027075	PRKCH	-0.206928	3.94795	-1.16949	0.243431	0.422933	-5.78079
ENSG00000027697	IFNGR1	0.279897	4.22111	2.08599	0.0380972	0.125428	-4.33767
ENSG00000027847	B4GALT7	-0.547474	-0.533545	-2.91115	0.00395988	0.0280439	-2.10471
ENSG00000027869	SH2D2A	0.112832	-0.135106	0.535511	0.592821	0.74369	-5.93786
ENSG00000028116	VRK2	0.190132	1.20141	1.49742	0.135673	0.288397	-5.21216
ENSG00000028137	TNFRSF1B	0.393735	5.72781	2.37585	0.0183401	0.0768254	-3.70337
ENSG00000028203	VEZT	-0.285743	1.22846	-2.40242	0.0170918	0.07373	-3.56492
ENSG00000028277	POU2F2	0.0158111	1.72212	0.0826118	0.934233	0.964003	-6.36612
ENSG00000028310	BRD9	-0.341301	1.39869	-2.73731	0.00668519	0.0400298	-2.76346
ENSG00000028528	SNX1	0.166953	3.59596	1.29104	0.198004	0.36834	-5.63289
ENSG00000028839	TBPL1	0.857707	1.88396	3.56536	0.000443014	0.00599608	-0.319416
ENSG00000029153	ARNTL2	0.380193	0.642754	2.20503	0.0284556	0.103247	-3.88007
ENSG00000029363	BCLAF1	0.0727134	2.89588	0.715267	0.47518	0.648415	-6.18488
ENSG00000029364	SLC39A9	0.207571	0.724736	1.88269	0.0610224	0.171287	-4.52393
ENSG00000029725	RABEP1	-0.249003	1.51565	-2.01375	0.0452168	0.140726	-4.40348
ENSG00000029993	HMGB3	-0.48269	1.45854	-1.46676	0.143827	0.299647	-5.32281
ENSG00000030066	NUP160	-0.23498	1.32817	-1.66281	0.0977319	0.230934	-5.01033
ENSG00000030110	BAK1	0.271705	0.491524	1.73614	0.0838971	0.209931	-4.74049
ENSG00000030582	GRN	-0.0284856	5.98998	-0.200889	0.840965	0.909921	-6.40095
ENSG00000031003	FAM13B	-0.0146686	1.78796	-0.141258	0.887792	0.939987	-6.3691
ENSG00000031081	ARHGAP31	0.275587	1.0529	1.8	0.0731895	0.192899	-4.719
ENSG00000031698	SARS1	-0.0417815	1.18389	-0.365291	0.715235	0.830196	-6.25032
ENSG00000031823	RANBP3	0.0656927	2.10795	0.497333	0.619436	0.764701	-6.27834
ENSG00000032219	ARID4A	0.351482	1.71463	2.94851	0.003527	0.0257756	-2.19405
ENSG00000032389	EIPR1	0.0344815	0.390594	0.231059	0.817477	0.898036	-6.16189
ENSG00000032444	PNPLA6	-0.173099	4.15195	-1.23666	0.217493	0.392321	-5.70146
ENSG00000032742	IFT88	-0.0820902	-0.414571	-0.493795	0.621929	0.766218	-5.89837
ENSG00000033030	ZCCHC8	-0.0488985	0.16957	-0.44407	0.657415	0.791536	-6.05523
ENSG00000033050	ABCF2	-0.457169	-0.34919	-2.49053	0.0134718	0.06317	-3.16207
ENSG00000033100	CHPF2	0.0703171	1.01585	0.604059	0.546408	0.708395	-6.10779
ENSG00000033170	FUT8	-0.420672	0.219813	-2.05873	0.040662	0.131619	-4.16236
ENSG00000033178	UBA6	0.0593281	2.01536	0.40456	0.686182	0.810692	-6.31074
ENSG00000033327	GAB2	-0.0691723	3.44323	-0.563759	0.573475	0.730119	-6.2911
ENSG00000033627	ATP6V0A1	-0.218261	3.04593	-1.75912	0.0799045	0.204147	-4.93771
ENSG00000033800	PIAS1	0.276066	2.79372	2.37352	0.0184533	0.0771355	-3.70521
ENSG00000033867	SLC4A7	-0.0218104	-0.0364752	-0.138896	0.889655	0.940583	-6.08102
ENSG00000034152	MAP2K3	-0.0415794	4.83849	-0.309815	0.756986	0.857906	-6.39494
ENSG00000034239	EFCAB1	-0.522885	-0.704341	-2.01723	0.0448492	0.14011	-4.09732
ENSG00000034510	TMSB10	0.0334685	7.03965	0.219311	0.826605	0.903319	-6.37467
ENSG00000034677	RNF19A	-0.123697	2.71982	-1.09588	0.274293	0.458195	-5.8467
ENSG00000034713	GABARAPL2	0.141685	3.87178	1.13072	0.259367	0.440551	-5.82389
ENSG00000035115	SH3YL1	-0.124881	0.110288	-0.65878	0.510705	0.680571	-5.93366
ENSG00000035403	VCL	0.105265	0.961995	0.757852	0.449326	0.626866	-5.98916
ENSG00000035664	DAPK2	-0.0694678	0.908908	-0.370836	0.711106	0.82734	-6.21431
ENSG00000035681	NSMAF	0.290639	3.80991	1.97838	0.0490956	0.148707	-4.54688
ENSG00000035687	ADSS2	0.0265147	1.01975	0.220982	0.825305	0.902865	-6.25674
ENSG00000035862	TIMP2	0.0494629	3.04111	0.382517	0.702436	0.821709	-6.36715
ENSG00000035928	RFC1	-0.0882757	1.54157	-0.598523	0.550088	0.711264	-6.17995
ENSG00000036054	TBC1D23	0.111263	1.10752	0.8213	0.412337	0.595256	-5.96522
ENSG00000036257	CUL3	-0.129127	2.85255	-1.23975	0.216347	0.39099	-5.68725
ENSG00000036549	AC118549.1	-0.199718	-0.102698	-1.05974	0.290391	0.475722	-5.56721
ENSG00000037241	RPL26L1	-0.462665	0.101016	-2.41354	0.0165917	0.0722541	-3.40795
ENSG00000037474	NSUN2	-0.202128	0.916629	-1.86882	0.0629356	0.174813	-4.60613
ENSG00000037637	FBXO42	0.0300704	0.0235535	0.244481	0.807079	0.890595	-6.07356
ENSG00000037749	MFAP3	0.061421	1.07327	0.496809	0.619805	0.764869	-6.17553
ENSG00000037897	METTL1	-0.513202	-0.579639	-2.71631	0.00710981	0.0417595	-2.59828
ENSG00000038210	PI4K2B	0.603769	0.685864	2.69579	0.00754818	0.0435746	-2.73768
ENSG00000038219	BOD1L1	0.313133	2.55116	2.42072	0.0162759	0.0713414	-3.58687
ENSG00000038274	MAT2B	0.52356	2.08425	3.89564	0.00012889	0.00261606	0.786363
ENSG00000038358	EDC4	-0.000712411	1.39041	-0.00545063	0.995656	0.997581	-6.33999
ENSG00000038382	TRIO	-0.211723	2.70847	-1.65127	0.100066	0.23448	-5.10763
ENSG00000038427	VCAN	0.244805	4.43925	1.09214	0.275929	0.459991	-5.86482
ENSG00000038532	CLEC16A	0.0666609	1.19157	0.567256	0.571101	0.728009	-6.15342
ENSG00000038945	MSR1	-0.871824	2.93675	-3.80495	0.000182439	0.00330742	0.424283
ENSG00000039068	CDH1	-0.0749746	0.605743	-0.293305	0.769557	0.865656	-6.19827
ENSG00000039123	MTREX	-0.0689357	0.873818	-0.485798	0.627579	0.770214	-6.15644
ENSG00000039319	ZFYVE16	0.227458	3.35518	1.50501	0.133711	0.285956	-5.33986
ENSG00000039523	RIPOR1	-0.211692	2.55581	-1.58724	0.11385	0.25776	-5.20403
ENSG00000039560	RAI14	-0.735162	-0.530256	-3.39859	0.000799939	0.00929704	-0.715673
ENSG00000039650	PNKP	-0.344103	2.60577	-2.15561	0.0321661	0.112296	-4.17927
ENSG00000040341	STAU2	0.0718696	1.8643	0.619157	0.536434	0.700446	-6.19361
ENSG00000040487	SLC66A1	-0.30992	0.058947	-2.43746	0.0155603	0.0691227	-3.33296
ENSG00000040531	CTNS	-0.0194043	1.50442	-0.13983	0.888918	0.940213	-6.34501
ENSG00000040633	PHF23	0.0338034	2.09506	0.267547	0.789291	0.879646	-6.36636
ENSG00000040933	INPP4A	0.144983	1.96631	1.05243	0.293724	0.478949	-5.846
ENSG00000041357	PSMA4	0.554445	3.35229	3.21928	0.00147316	0.0143111	-1.47929
ENSG00000041802	LSG1	-0.0221927	0.230605	-0.144836	0.884969	0.938148	-6.14267
ENSG00000042062	RIPOR3	0.366483	0.630044	2.29059	0.0229052	0.089228	-3.69242
ENSG00000042088	TDP1	-0.0455534	-0.0248312	-0.267413	0.789394	0.879646	-6.07603
ENSG00000042429	MED17	0.126325	1.33657	1.50906	0.132674	0.284416	-5.21998
ENSG00000042445	RETSAT	-0.051359	0.652768	-0.439682	0.660586	0.793509	-6.14068
ENSG00000042493	CAPG	-0.31267	4.35649	-2.44452	0.015267	0.068344	-3.55777
ENSG00000042753	AP2S1	-0.087794	2.58103	-0.585259	0.558955	0.718285	-6.26074
ENSG00000042832	TG	-0.169163	1.05951	-0.72441	0.46956	0.643871	-6.04716
ENSG00000042980	ADAM28	0.358149	0.714292	1.86906	0.0629025	0.174771	-4.52973
ENSG00000043093	DCUN1D1	0.168894	1.12601	1.16701	0.244433	0.423924	-5.62919
ENSG00000043143	JADE2	-0.0217683	0.680205	-0.146887	0.883352	0.937341	-6.22836
ENSG00000043462	LCP2	0.507703	7.02389	4.07234	6.43222e-05	0.0015406	1.41067
ENSG00000044115	CTNNA1	-0.285547	4.10376	-2.7838	0.0058257	0.0363193	-2.71669
ENSG00000044446	PHKA2	-0.0445782	1.11408	-0.277285	0.781814	0.874864	-6.26561
ENSG00000044574	HSPA5	-0.137507	3.94237	-0.948319	0.343976	0.528582	-6.00909
ENSG00000046651	OFD1	-0.111411	0.179376	-0.78901	0.43093	0.611419	-5.8591
ENSG00000047056	WDR37	0.110489	1.41624	0.86017	0.390603	0.575097	-5.97129
ENSG00000047188	YTHDC2	0.393334	0.591927	2.89613	0.00414718	0.0288923	-2.2097
ENSG00000047249	ATP6V1H	0.043403	2.62021	0.359714	0.719395	0.83244	-6.36288
ENSG00000047315	POLR2B	0.196065	1.2797	1.55551	0.121219	0.268394	-5.13381
ENSG00000047346	FAM214A	-0.162562	0.912016	-1.15963	0.247418	0.427746	-5.62884
ENSG00000047365	ARAP2	0.683419	2.31342	4.06204	6.70245e-05	0.00158603	1.38223
ENSG00000047410	TPR	0.223941	2.21912	1.97228	0.0497919	0.150169	-4.51407
ENSG00000047457	CP	0.430732	0.569594	1.60557	0.109759	0.251097	-4.93692
ENSG00000047578	KIAA0556	-0.00364455	1.50753	-0.0292076	0.976725	0.986079	-6.35214
ENSG00000047579	DTNBP1	0.630533	1.74059	4.56932	8.03399e-06	0.000336539	3.37213
ENSG00000047621	C12orf4	-0.155559	0.667547	-0.901173	0.368452	0.552818	-5.86332
ENSG00000047644	WWC3	0.159335	0.701281	1.32186	0.187545	0.355831	-5.38196
ENSG00000047849	MAP4	-0.154821	1.72845	-1.46393	0.144596	0.300804	-5.33562
ENSG00000048052	HDAC9	-0.412708	-0.027486	-2.09218	0.0375341	0.123988	-4.06156
ENSG00000048342	CC2D2A	0.324446	3.4301	2.04276	0.0422319	0.135096	-4.41876
ENSG00000048392	RRM2B	0.160684	1.21055	1.02684	0.305588	0.491698	-5.78629
ENSG00000048405	ZNF800	-0.0644352	0.885647	-0.559054	0.576676	0.733058	-6.1235
ENSG00000048471	SNX29	-0.24691	1.11876	-1.85626	0.0647121	0.177841	-4.6566
ENSG00000048649	RSF1	0.396978	2.21116	3.68915	0.000281691	0.00444386	0.0581162
ENSG00000048707	VPS13D	0.132299	2.02465	0.902489	0.367754	0.552407	-5.99368
ENSG00000048740	CELF2	0.321967	2.83882	2.89951	0.00410436	0.0287978	-2.39044
ENSG00000048828	FAM120A	0.0260424	2.58584	0.26382	0.792158	0.881329	-6.39184
ENSG00000048991	R3HDM1	-0.0494307	1.43766	-0.297075	0.766681	0.86392	-6.30091
ENSG00000049089	COL9A2	-0.266973	0.13598	-1.12858	0.260266	0.441886	-5.54723
ENSG00000049239	H6PD	0.137452	0.560275	1.35531	0.176667	0.342412	-5.31685
ENSG00000049245	VAMP3	0.301122	3.44176	1.88208	0.0611046	0.171408	-4.72241
ENSG00000049540	ELN	-0.497647	0.703164	-2.20486	0.0284681	0.103247	-3.94317
ENSG00000049541	RFC2	0.281667	0.40337	1.79772	0.0735512	0.193489	-4.62099
ENSG00000049618	ARID1B	-0.0783473	2.04884	-0.781246	0.435472	0.615022	-6.10032
ENSG00000049656	CLPTM1L	-0.233585	3.02742	-2.10294	0.0365729	0.121912	-4.2971
ENSG00000049759	NEDD4L	-0.495368	1.2329	-2.34478	0.0199013	0.0811215	-3.70255
ENSG00000049860	HEXB	-0.123707	3.35822	-0.904736	0.366565	0.551332	-6.04579
ENSG00000050130	JKAMP	0.0174204	0.894473	0.118548	0.905738	0.949533	-6.25291
ENSG00000050327	ARHGEF5	-0.961834	-0.615962	-5.11379	6.70981e-07	5.7436e-05	5.67889
ENSG00000050344	NFE2L3	0.607058	1.83183	3.42008	0.000742209	0.00880278	-0.795323
ENSG00000050405	LIMA1	-0.191166	0.060255	-1.0519	0.293965	0.479246	-5.60342
ENSG00000050426	LETMD1	-0.100391	0.618959	-0.655238	0.512978	0.682123	-6.02555
ENSG00000050438	SLC4A8	-0.645477	-0.166211	-3.62502	0.000356694	0.00521791	-0.0207936
ENSG00000050730	TNIP3	0.324556	3.27341	1.06397	0.288472	0.47384	-5.88625
ENSG00000050748	MAPK9	-0.393233	0.480813	-2.51127	0.0127263	0.0608734	-3.23758
ENSG00000050820	BCAR1	-1.00801	-0.344193	-3.97697	9.38779e-05	0.00204454	1.17934
ENSG00000051009	FAM160A2	0.00973573	1.64745	0.0639826	0.94904	0.972487	-6.3615
ENSG00000051108	HERPUD1	-0.0347842	3.29954	-0.249783	0.802981	0.887782	-6.41445
ENSG00000051128	HOMER3	0.0259791	1.35703	0.165724	0.868522	0.926922	-6.31908
ENSG00000051382	PIK3CB	0.107296	1.51341	0.812046	0.417616	0.599623	-6.01977
ENSG00000051523	CYBA	0.0813438	6.50394	0.602116	0.547698	0.709319	-6.23344
ENSG00000051596	THOC3	-0.472132	0.318552	-2.24733	0.0255809	0.0966816	-3.80364
ENSG00000051620	HEBP2	0.0807842	1.37953	0.492213	0.623045	0.76704	-6.21464
ENSG00000051825	MPHOSPH9	-0.121197	0.114192	-0.626928	0.531337	0.696678	-5.94589
ENSG00000052126	PLEKHA5	-0.536582	-0.203679	-2.78129	0.00586949	0.0364768	-2.48105
ENSG00000052344	PRSS8	-0.28148	-0.0835992	-1.38931	0.166099	0.328592	-5.20649
ENSG00000052723	SIKE1	0.155594	0.426051	0.85853	0.391506	0.575823	-5.81291
ENSG00000052749	RRP12	-0.378662	2.12026	-2.46562	0.0144191	0.0657014	-3.47944
ENSG00000052795	FNIP2	0.244157	3.21048	1.48926	0.137807	0.291173	-5.35958
ENSG00000052802	MSMO1	0.0601729	-0.00712656	0.343129	0.731819	0.840207	-6.04021
ENSG00000052841	TTC17	0.10394	1.46746	0.902431	0.367785	0.552407	-5.93949
ENSG00000053254	FOXN3	-0.298902	2.95418	-2.34102	0.0200979	0.0816523	-3.79038
ENSG00000053371	AKR7A2	-0.6992	-0.356775	-4.24636	3.17e-05	0.000943858	2.16776
ENSG00000053501	USE1	-0.0175359	0.667075	-0.115688	0.908002	0.950745	-6.22678
ENSG00000053524	MCF2L2	-0.112439	0.644286	-0.589581	0.556058	0.716096	-6.07799
ENSG00000053770	AP5M1	0.230942	0.698718	1.78962	0.0748489	0.195672	-4.67537
ENSG00000053900	ANAPC4	0.196223	0.383663	1.33819	0.182174	0.349806	-5.28786
ENSG00000053918	KCNQ1	-0.0109432	0.743942	-0.074988	0.94029	0.967785	-6.24388
ENSG00000054116	TRAPPC3	0.109349	1.45901	0.80214	0.423311	0.605136	-6.02483
ENSG00000054118	THRAP3	0.0908626	2.54247	0.913499	0.36195	0.546897	-6.01502
ENSG00000054148	PHPT1	-0.510985	0.488979	-2.2322	0.0265787	0.099144	-3.86992
ENSG00000054267	ARID4B	0.670522	3.43679	4.21227	3.64775e-05	0.00102889	1.91806
ENSG00000054277	OPN3	-0.819431	0.224789	-5.05501	8.85948e-07	6.97702e-05	5.44374
ENSG00000054282	SDCCAG8	-0.241955	1.80667	-1.90561	0.0579642	0.166162	-4.62979
ENSG00000054523	KIF1B	0.443753	2.54769	4.10985	5.53291e-05	0.00137888	1.54628
ENSG00000054611	TBC1D22A	-0.152006	1.35794	-1.52883	0.127699	0.277377	-5.21078
ENSG00000054654	SYNE2	-0.151347	2.36158	-1.04478	0.297238	0.482203	-5.88653
ENSG00000054965	FAM168A	0.315281	1.64665	2.30595	0.0220159	0.087038	-3.78484
ENSG00000054967	RELT	-0.153322	3.03362	-1.01088	0.313149	0.49986	-5.942
ENSG00000054983	GALC	0.177661	3.17484	1.41861	0.157383	0.318193	-5.4595
ENSG00000055044	NOP58	-0.186781	1.11693	-1.25681	0.210115	0.383957	-5.5538
ENSG00000055070	SZRD1	0.121175	2.63749	1.11742	0.264998	0.447298	-5.8172
ENSG00000055130	CUL1	0.460186	1.57965	3.04151	0.00263077	0.0211234	-1.9163
ENSG00000055147	FAM114A2	0.131318	0.596143	0.840167	0.401699	0.585408	-5.86107
ENSG00000055163	CYFIP2	0.0630773	3.16092	0.443473	0.657846	0.791958	-6.34493
ENSG00000055208	TAB2	0.273106	3.14218	2.52729	0.0121754	0.0590997	-3.35537
ENSG00000055211	GINM1	-0.0913211	0.0639056	-0.673385	0.501388	0.67225	-5.90307
ENSG00000055332	EIF2AK2	1.13868	3.46213	5.54179	8.27373e-08	1.18039e-05	7.6433
ENSG00000055483	AC022966.1	-0.111718	2.10839	-0.799851	0.424634	0.60613	-6.09298
ENSG00000055609	KMT2C	0.00803835	2.83554	0.0854876	0.931949	0.962252	-6.43107
ENSG00000055917	PUM2	0.350017	2.29465	3.3215	0.00104339	0.0111546	-1.1401
ENSG00000055950	MRPL43	-0.374425	0.196395	-2.3125	0.0216463	0.0860017	-3.64421
ENSG00000055955	ITIH4	0.0175174	0.628965	0.0907045	0.927807	0.960695	-6.22495
ENSG00000056097	ZFR	-0.0697341	1.61205	-0.750133	0.453952	0.631529	-6.09097
ENSG00000056558	TRAF1	0.610697	2.30644	2.72223	0.00698783	0.0412399	-2.82636
ENSG00000056586	RC3H2	-0.110808	1.60198	-0.867979	0.386323	0.570844	-5.99908
ENSG00000056972	TRAF3IP2	-0.154333	1.15089	-1.07357	0.284154	0.469095	-5.76186
ENSG00000057019	DCBLD2	-0.267337	-0.381146	-1.22021	0.22365	0.400511	-5.34696
ENSG00000057149	SERPINB3	0.669748	0.676989	1.9251	0.0554668	0.161476	-4.39583
ENSG00000057252	SOAT1	-0.181379	2.01513	-1.0452	0.297043	0.48218	-5.86969
ENSG00000057608	GDI2	0.24636	3.34131	2.17721	0.0304963	0.10848	-4.14534
ENSG00000057657	PRDM1	0.617644	2.43746	3.61805	0.000365894	0.00527909	-0.185064
ENSG00000057663	ATG5	0.0469955	0.538686	0.3706	0.711281	0.827446	-6.1357
ENSG00000057704	TMCC3	-0.166088	1.93934	-0.924515	0.3562	0.541283	-5.97639
ENSG00000057757	PITHD1	-0.362003	0.213853	-2.7979	0.00558558	0.0352187	-2.48439
ENSG00000058063	ATP11B	0.344282	3.924	2.56124	0.0110783	0.0553859	-3.2811
ENSG00000058091	CDK14	0.0482665	1.32455	0.328261	0.743017	0.847124	-6.27531
ENSG00000058262	SEC61A1	0.094193	2.39819	0.814449	0.416242	0.59845	-6.09175
ENSG00000058272	PPP1R12A	0.213554	3.96283	1.8908	0.0599249	0.169317	-4.7111
ENSG00000058453	CROCC	-0.315481	1.46056	-1.93504	0.0542275	0.159393	-4.55046
ENSG00000058600	POLR3E	-0.211426	0.563947	-1.37499	0.17049	0.334723	-5.32471
ENSG00000058668	ATP2B4	0.202154	1.73936	1.51868	0.130235	0.280843	-5.23787
ENSG00000058673	ZC3H11A	0.382377	2.51382	3.09751	0.00219767	0.0186499	-1.81949
ENSG00000058799	YIPF1	0.38838	1.46005	3.15402	0.00182809	0.0167692	-1.58583
ENSG00000059122	FLYWCH1	-0.50745	0.479057	-3.18743	0.00163752	0.0153961	-1.44334
ENSG00000059145	UNKL	-0.103018	1.4501	-0.646804	0.518412	0.68629	-6.14695
ENSG00000059377	TBXAS1	0.135277	3.99858	0.97851	0.328864	0.514408	-5.98066
ENSG00000059378	PARP12	1.06058	3.86868	4.79779	2.90722e-06	0.000176659	4.28252
ENSG00000059728	MXD1	0.483856	6.39024	3.70526	0.000265339	0.00426723	0.0959432
ENSG00000059758	CDK17	0.40477	2.40893	2.80864	0.00540882	0.0345294	-2.61679
ENSG00000059804	SLC2A3	0.294883	6.16049	1.87066	0.0626792	0.174423	-4.72277
ENSG00000059915	PSD	-0.241395	0.667167	-1.30587	0.192918	0.362186	-5.43615
ENSG00000060069	CTDP1	-0.202834	2.25996	-1.51623	0.130854	0.281804	-5.29465
ENSG00000060138	YBX3	-0.158924	3.76247	-1.20064	0.231142	0.408294	-5.74465
ENSG00000060237	WNK1	-0.0440547	3.75963	-0.49434	0.621544	0.766151	-6.3288
ENSG00000060339	CCAR1	-0.151706	1.69344	-1.19549	0.233144	0.411081	-5.68296
ENSG00000060491	OGFR	0.301173	3.23003	2.02067	0.0444886	0.139518	-4.45896
ENSG00000060558	GNA15	0.0784156	2.54988	0.620833	0.535332	0.699564	-6.23383
ENSG00000060642	PIGV	0.318219	-0.153345	1.61089	0.108595	0.249128	-4.79545
ENSG00000060656	PTPRU	-0.443095	-0.502435	-1.88128	0.0612139	0.171629	-4.39133
ENSG00000060688	SNRNP40	-0.0988824	0.139601	-0.57191	0.567949	0.725388	-5.98849
ENSG00000060762	MPC1	0.000587691	0.344303	0.00315758	0.997483	0.998665	-6.1754
ENSG00000060971	ACAA1	-0.269313	3.02353	-2.35436	0.0194079	0.0799042	-3.76132
ENSG00000060982	BCAT1	-0.189953	2.02922	-1.33492	0.18324	0.351073	-5.53543
ENSG00000061273	HDAC7	-0.095101	2.50098	-0.820771	0.412638	0.595341	-6.0937
ENSG00000061936	SFSWAP	0.0708881	1.58141	0.667625	0.505051	0.675506	-6.13592
ENSG00000061938	TNK2	0.415682	2.55119	2.66304	0.00829849	0.0464149	-3.00005
ENSG00000061987	MON2	0.043069	1.59999	0.381835	0.702941	0.821726	-6.28734
ENSG00000062038	CDH3	-0.180559	-0.636289	-0.889217	0.374828	0.559316	-5.62873
ENSG00000062194	GPBP1	0.545995	3.19464	4.22298	3.49066e-05	0.00100181	1.96091
ENSG00000062282	DGAT2	0.366763	3.57128	1.81206	0.0712992	0.189541	-4.84793
ENSG00000062485	CS	-0.186229	2.23047	-1.93791	0.0538752	0.158718	-4.59362
ENSG00000062582	MRPS24	-0.103287	1.05702	-0.605463	0.545477	0.707725	-6.12946
ENSG00000062598	ELMO2	0.372407	2.53173	2.64194	0.00881689	0.047889	-3.05291
ENSG00000062650	WAPL	0.220704	1.40021	2.0404	0.0424683	0.135469	-4.31466
ENSG00000062716	VMP1	0.21764	5.47625	1.89695	0.059105	0.167916	-4.68697
ENSG00000062725	APPBP2	0.149312	0.671335	1.19496	0.23335	0.411224	-5.53827
ENSG00000062822	POLD1	0.0223373	-0.0166571	0.139574	0.889121	0.94022	-6.09942
ENSG00000063015	SEZ6	-0.0725267	-0.20974	-0.331808	0.740341	0.84576	-6.01809
ENSG00000063046	EIF4B	-0.224228	2.94561	-2.18535	0.0298861	0.106943	-4.12686
ENSG00000063169	BICRA	-0.0257104	0.232256	-0.179196	0.857944	0.921156	-6.13629
ENSG00000063177	RPL18	-0.111435	4.3399	-0.800131	0.424471	0.606106	-6.13408
ENSG00000063241	ISOC2	-0.520268	0.259483	-2.83791	0.00495235	0.0324358	-2.39704
ENSG00000063244	U2AF2	-0.124313	2.91548	-0.926484	0.355179	0.540315	-6.01864
ENSG00000063245	EPN1	-0.186148	2.2284	-1.58753	0.113784	0.257699	-5.18887
ENSG00000063322	MED29	0.0645532	1.5604	0.559388	0.576449	0.732877	-6.19893
ENSG00000063601	MTMR1	0.0383033	0.773271	0.276037	0.782771	0.875599	-6.20925
ENSG00000063854	HAGH	-0.570798	0.955096	-4.19164	3.9696e-05	0.00108546	1.89922
ENSG00000063978	RNF4	-0.384331	1.93762	-3.26771	0.00125238	0.0127888	-1.30585
ENSG00000064012	CASP8	0.171224	2.71447	1.3115	0.191014	0.359804	-5.58825
ENSG00000064115	TM7SF3	-0.062337	1.42792	-0.372226	0.710072	0.826431	-6.27658
ENSG00000064225	ST3GAL6	0.474639	2.34495	2.96153	0.00338652	0.0251031	-2.19669
ENSG00000064270	ATP2C2	-0.581697	0.500089	-2.49041	0.0134763	0.06317	-3.29591
ENSG00000064313	TAF2	-0.16854	1.09241	-1.33352	0.183698	0.351677	-5.44722
ENSG00000064393	HIPK2	-0.062443	1.5715	-0.485246	0.62797	0.770598	-6.24766
ENSG00000064419	TNPO3	0.306266	1.03346	2.66982	0.00813786	0.0457505	-2.86463
ENSG00000064490	RFXANK	0.165696	1.35431	1.1484	0.252014	0.433191	-5.6831
ENSG00000064547	LPAR2	0.439776	3.10369	2.46552	0.0144231	0.0657014	-3.49913
ENSG00000064601	CTSA	0.253532	4.08238	1.73726	0.0836984	0.209926	-4.98013
ENSG00000064607	SUGP2	-0.0876838	0.739247	-0.744092	0.45759	0.63445	-5.98474
ENSG00000064666	CNN2	0.326488	5.24938	3.22454	0.00144756	0.0141789	-1.46432
ENSG00000064687	ABCA7	-0.0289775	2.18985	-0.207688	0.835659	0.907772	-6.38594
ENSG00000064726	BTBD1	-0.434149	1.70522	-2.65842	0.00840953	0.0467653	-2.98994
ENSG00000064763	FAR2	0.192111	2.08476	1.38946	0.166056	0.328573	-5.45369
ENSG00000064886	CHI3L2	0.0204874	-0.0956038	0.109945	0.91255	0.952714	-6.07682
ENSG00000064932	SBNO2	0.188128	5.22651	1.70084	0.0903431	0.219535	-5.03124
ENSG00000064961	HMG20B	-0.266125	1.03387	-2.02335	0.0442099	0.139012	-4.34056
ENSG00000064995	TAF11	-0.0278619	0.123007	-0.241932	0.809051	0.892058	-6.10116
ENSG00000064999	ANKS1A	-0.0177694	0.951408	-0.176145	0.860337	0.922164	-6.26738
ENSG00000065000	AP3D1	-0.122578	2.82533	-1.44902	0.148712	0.306301	-5.41341
ENSG00000065029	ZNF76	-0.192824	0.267288	-1.49299	0.136829	0.289789	-5.11808
ENSG00000065054	SLC9A3R2	-0.249369	0.123055	-1.04107	0.298949	0.484341	-5.64253
ENSG00000065135	GNAI3	0.35858	1.48647	3.14406	0.0018887	0.0170416	-1.61711
ENSG00000065150	IPO5	-0.435687	0.703857	-2.74679	0.00650121	0.039373	-2.67966
ENSG00000065154	OAT	-0.111376	1.26245	-0.771309	0.441326	0.620742	-6.03587
ENSG00000065243	PKN2	0.305434	1.55756	2.1074	0.0361805	0.121225	-4.19326
ENSG00000065268	WDR18	-0.00167899	-0.110187	-0.00881437	0.992975	0.996315	-6.10414
ENSG00000065357	DGKA	0.283487	3.34046	1.88644	0.0605126	0.170488	-4.71237
ENSG00000065361	ERBB3	-0.416395	1.28834	-1.61827	0.106994	0.246546	-5.08168
ENSG00000065413	ANKRD44	0.452121	3.24906	2.82679	0.00512142	0.0331897	-2.59479
ENSG00000065427	KARS1	0.335717	2.2232	2.21767	0.0275689	0.101245	-4.02098
ENSG00000065457	ADAT1	0.0136818	1.99004	0.0851495	0.932218	0.962428	-6.38963
ENSG00000065518	NDUFB4	0.0413754	2.00549	0.24301	0.808217	0.891439	-6.36115
ENSG00000065526	SPEN	0.00831106	1.61411	0.0803434	0.936035	0.965053	-6.35627
ENSG00000065548	ZC3H15	0.124424	1.76597	1.05369	0.293146	0.478325	-5.82514
ENSG00000065559	MAP2K4	0.00571965	1.22596	0.041433	0.966987	0.980732	-6.31193
ENSG00000065600	PACC1	-0.215546	-0.186002	-1.27998	0.20186	0.372819	-5.31049
ENSG00000065613	SLK	0.260776	2.26666	2.11858	0.035213	0.119037	-4.2284
ENSG00000065615	CYB5R4	0.307397	3.02616	2.44207	0.0153683	0.0686425	-3.55418
ENSG00000065621	GSTO2	-0.00770848	0.524325	-0.0475908	0.962084	0.97798	-6.20462
ENSG00000065665	SEC61A2	-0.0293457	-0.185581	-0.133657	0.893792	0.942931	-6.0408
ENSG00000065717	TLE2	-0.623816	-0.81376	-2.6255	0.00924068	0.0492236	-2.80191
ENSG00000065802	ASB1	-0.0263524	0.243197	-0.162543	0.871023	0.928562	-6.15798
ENSG00000065809	FAM107B	-0.013465	4.1145	-0.114727	0.908763	0.95108	-6.44222
ENSG00000065882	TBC1D1	-0.14963	2.94072	-1.50078	0.134802	0.287453	-5.34198
ENSG00000065883	CDK13	0.00859076	1.91746	0.0961865	0.923457	0.958304	-6.38176
ENSG00000065911	MTHFD2	0.636834	2.93926	4.70662	4.38086e-06	0.000216709	3.9042
ENSG00000065923	SLC9A7	-0.163162	-0.457402	-0.835079	0.404551	0.587869	-5.68725
ENSG00000065970	FOXJ2	-0.288589	0.0149448	-2.54134	0.0117103	0.057523	-3.08915
ENSG00000065978	YBX1	-0.471267	4.24181	-2.88744	0.00425921	0.0293611	-2.43727
ENSG00000065989	PDE4A	0.0202608	1.45641	0.155089	0.876889	0.932494	-6.33223
ENSG00000066027	PPP2R5A	0.144496	1.60705	1.14959	0.251524	0.432868	-5.70553
ENSG00000066044	ELAVL1	-0.451964	0.613838	-3.42344	0.000733524	0.00878445	-0.735719
ENSG00000066084	DIP2B	0.451984	2.26615	3.80956	0.000179269	0.00326197	0.471911
ENSG00000066117	SMARCD1	-0.105485	0.974816	-0.891315	0.373704	0.558232	-5.90515
ENSG00000066135	KDM4A	-0.191493	0.307421	-1.46649	0.143899	0.299733	-5.15256
ENSG00000066136	NFYC	0.250489	2.5753	2.51782	0.0124984	0.060175	-3.36108
ENSG00000066294	CD84	0.260072	1.41357	1.28045	0.201695	0.372791	-5.5281
ENSG00000066322	ELOVL1	0.0708767	2.09508	0.653153	0.514319	0.682799	-6.18957
ENSG00000066336	SPI1	0.296285	6.28882	2.68813	0.00771797	0.0442014	-2.94075
ENSG00000066379	ZNRD1	-0.0351632	-0.0418982	-0.202288	0.839873	0.909532	-6.07671
ENSG00000066422	ZBTB11	0.250985	0.143899	2.01137	0.0454688	0.141331	-4.18458
ENSG00000066427	ATXN3	-0.134841	1.40676	-0.91245	0.3625	0.547476	-5.94387
ENSG00000066455	GOLGA5	0.278838	0.436154	1.93309	0.0544693	0.159535	-4.37602
ENSG00000066629	EML1	-0.497032	-0.318292	-2.38023	0.0181292	0.076299	-3.42814
ENSG00000066654	THUMPD1	-0.0838296	0.404241	-0.666248	0.50593	0.67613	-5.97731
ENSG00000066739	ATG2B	-0.0785852	0.00844976	-0.480989	0.630988	0.773113	-5.99948
ENSG00000066777	ARFGEF1	0.293787	1.90732	2.89371	0.00417814	0.0290463	-2.36335
ENSG00000066827	ZFAT	-0.259924	0.17412	-1.63229	0.104005	0.241127	-4.89083
ENSG00000066855	MTFR1	-0.121139	0.861652	-0.674362	0.500768	0.671785	-6.05381
ENSG00000066923	STAG3	-0.200576	1.1782	-1.33266	0.183979	0.351735	-5.46471
ENSG00000066933	MYO9A	-0.239637	0.420121	-1.43798	0.151818	0.310586	-5.22816
ENSG00000067048	DDX3Y	0.196548	0.978476	1.12115	0.26341	0.445683	-5.59821
ENSG00000067057	PFKP	-0.238861	1.80868	-1.58645	0.11403	0.258048	-5.16789
ENSG00000067064	IDI1	0.62868	2.74373	3.83713	0.000161394	0.0030436	0.556644
ENSG00000067066	SP100	0.733223	5.18263	6.06543	5.45252e-09	1.64852e-06	10.2217
ENSG00000067082	KLF6	0.147518	5.88823	1.3165	0.189334	0.357891	-5.58076
ENSG00000067167	TRAM1	-0.109207	2.40174	-0.824653	0.410434	0.593565	-6.08844
ENSG00000067182	TNFRSF1A	0.311066	5.22459	2.94523	0.00356317	0.0259658	-2.27338
ENSG00000067208	EVI5	-0.503285	1.01636	-2.89171	0.00420389	0.0291924	-2.33118
ENSG00000067225	PKM	-0.154498	5.58111	-1.45094	0.148178	0.305804	-5.40219
ENSG00000067334	DNTTIP2	0.286842	2.57694	2.11634	0.0354049	0.119399	-4.24951
ENSG00000067365	METTL22	-0.0341659	2.11307	-0.219977	0.826087	0.903007	-6.37874
ENSG00000067369	TP53BP1	-0.158158	1.28026	-1.18316	0.237983	0.416777	-5.6532
ENSG00000067560	RHOA	-0.0193096	5.82637	-0.198243	0.843032	0.911622	-6.40484
ENSG00000067596	DHX8	0.0268138	1.72222	0.236084	0.813581	0.895448	-6.34626
ENSG00000067606	PRKCZ	-0.855348	0.0548673	-4.45466	1.3194e-05	0.000493848	2.95232
ENSG00000067704	IARS2	-0.199419	-0.0804669	-1.30791	0.192227	0.36117	-5.29425
ENSG00000067798	NAV3	-0.586526	-0.396252	-2.20747	0.0282827	0.10285	-3.77213
ENSG00000067829	IDH3G	0.0467934	1.57278	0.344406	0.73086	0.8399	-6.29647
ENSG00000067836	ROGDI	0.0609624	0.461899	0.360622	0.718718	0.832068	-6.13137
ENSG00000067900	ROCK1	-0.00663215	2.88791	-0.0609486	0.951454	0.973325	-6.43377
ENSG00000067955	CBFB	0.11378	2.34007	0.921294	0.357875	0.542878	-5.99686
ENSG00000068024	HDAC4	0.233587	3.6275	1.78067	0.0763047	0.197774	-4.90429
ENSG00000068028	RASSF1	-0.297996	-0.146936	-2.11323	0.0356736	0.120017	-3.99667
ENSG00000068079	IFI35	0.939084	3.39356	4.40768	1.61226e-05	0.000577552	2.68209
ENSG00000068097	HEATR6	0.053782	0.803927	0.352541	0.72476	0.835817	-6.19021
ENSG00000068120	COASY	-0.172684	1.19997	-1.42066	0.156787	0.317433	-5.34778
ENSG00000068305	MEF2A	0.326202	2.72293	2.67414	0.00803697	0.0453907	-2.97948
ENSG00000068308	OTUD5	0.343356	2.38037	3.05128	0.00254997	0.0205922	-1.94872
ENSG00000068323	TFE3	0.153111	3.30023	1.36819	0.172605	0.337128	-5.53044
ENSG00000068366	ACSL4	0.221511	3.18986	1.74539	0.0822705	0.207766	-4.95824
ENSG00000068383	INPP5A	-0.145579	1.55425	-0.905403	0.366212	0.550969	-5.96398
ENSG00000068400	GRIPAP1	0.236925	3.24514	2.00668	0.0459699	0.142528	-4.48654
ENSG00000068438	FTSJ1	-0.431173	0.0378333	-2.6215	0.00934658	0.0496534	-2.91615
ENSG00000068650	ATP11A	-0.0559503	3.54814	-0.498079	0.618911	0.764695	-6.32578
ENSG00000068654	POLR1A	-0.409152	-0.16014	-2.32027	0.0212145	0.0848581	-3.57558
ENSG00000068697	LAPTM4A	0.315065	3.11412	2.53895	0.0117882	0.0577904	-3.32644
ENSG00000068724	TTC7A	-0.136076	1.60999	-1.13811	0.256274	0.437295	-5.73709
ENSG00000068745	IP6K2	0.127536	2.18073	1.2207	0.223466	0.400254	-5.67493
ENSG00000068784	SRBD1	0.54908	0.923185	2.88496	0.00429175	0.0295028	-2.27039
ENSG00000068796	KIF2A	0.0430991	0.783618	0.28987	0.77218	0.867733	-6.20352
ENSG00000068831	RASGRP2	0.235429	2.44722	1.51267	0.131754	0.283184	-5.29955
ENSG00000068878	PSME4	-0.294931	1.18586	-2.3288	0.0207492	0.0834715	-3.72219
ENSG00000068885	IFT80	-0.375072	0.559115	-2.17134	0.0309421	0.109409	-3.98491
ENSG00000068903	SIRT2	-0.174181	1.89375	-1.59436	0.112247	0.255128	-5.15958
ENSG00000068912	ERLEC1	0.0834262	0.655723	0.576281	0.564996	0.723066	-6.06118
ENSG00000068971	PPP2R5B	-0.423507	0.202669	-2.96742	0.00332478	0.0248513	-2.0345
ENSG00000068976	PYGM	-0.124233	-0.207411	-0.543971	0.586996	0.739491	-5.93493
ENSG00000069011	PITX1	-0.0804784	-0.450091	-0.355839	0.722292	0.834731	-5.96988
ENSG00000069020	MAST4	-0.125275	0.342058	-0.627301	0.531093	0.696678	-5.99243
ENSG00000069248	NUP133	0.057863	0.640046	0.390628	0.696439	0.817815	-6.14556
ENSG00000069275	NUCKS1	-0.360393	0.425305	-1.88446	0.0607813	0.170952	-4.52514
ENSG00000069329	VPS35	0.33869	2.38686	3.22251	0.00145741	0.0142329	-1.44398
ENSG00000069345	DNAJA2	0.137923	1.81356	1.68567	0.0932333	0.223851	-4.9938
ENSG00000069399	BCL3	0.247464	5.45327	1.96434	0.0507114	0.151966	-4.56248
ENSG00000069424	KCNAB2	-0.300776	3.23385	-2.13244	0.0340446	0.116381	-4.241
ENSG00000069493	CLEC2D	0.399829	1.22119	2.19826	0.0289408	0.104433	-3.96031
ENSG00000069667	RORA	-0.637798	0.0532445	-3.632	0.000347698	0.00510857	-0.0171813
ENSG00000069849	ATP1B3	0.0162514	3.4223	0.114397	0.909024	0.951143	-6.43957
ENSG00000069869	NEDD4	-0.599196	3.38759	-2.38326	0.0179842	0.0759815	-3.70011
ENSG00000069943	PIGB	-0.0130646	1.7152	-0.0857497	0.931741	0.962252	-6.36929
ENSG00000069956	MAPK6	-0.141334	2.46074	-1.20926	0.227823	0.40489	-5.711
ENSG00000069974	RAB27A	0.36117	3.21206	2.45386	0.0148861	0.0670659	-3.52925
ENSG00000070010	UFD1	-0.0865304	1.74546	-0.764749	0.445216	0.623961	-6.09508
ENSG00000070047	PHRF1	0.233632	0.997782	1.87661	0.0618551	0.173032	-4.57179
ENSG00000070081	NUCB2	-0.159519	2.17844	-0.953232	0.341487	0.526318	-5.96732
ENSG00000070087	PFN2	-0.138797	0.376097	-0.724414	0.469558	0.643871	-5.93934
ENSG00000070190	DAPP1	0.96176	2.62548	4.77824	3.17599e-06	0.00018177	4.21769
ENSG00000070214	SLC44A1	-0.150805	0.22589	-0.978606	0.328817	0.514408	-5.70175
ENSG00000070269	TMEM260	0.284517	1.45974	2.10069	0.036772	0.122457	-4.19785
ENSG00000070366	SMG6	-0.312181	1.13858	-2.0598	0.0405587	0.13151	-4.28379
ENSG00000070367	EXOC5	-0.0803539	1.49555	-0.709453	0.478772	0.651827	-6.10987
ENSG00000070413	DGCR2	0.332278	1.64762	2.3639	0.0189273	0.0785709	-3.65549
ENSG00000070423	RNF126	-0.234976	0.346497	-1.72151	0.0865203	0.214151	-4.77987
ENSG00000070444	MNT	-0.381028	2.26779	-2.85294	0.00473195	0.0316177	-2.51067
ENSG00000070476	ZXDC	-0.0276973	0.878183	-0.286363	0.774862	0.870051	-6.2267
ENSG00000070495	JMJD6	0.204223	2.92238	1.54297	0.124232	0.272308	-5.27445
ENSG00000070501	POLB	0.0863941	1.64155	0.536262	0.592303	0.743513	-6.22113
ENSG00000070526	ST6GALNAC1	-0.0555206	0.258479	-0.250893	0.802124	0.887467	-6.13483
ENSG00000070540	WIPI1	-0.0861674	2.06523	-0.678839	0.497932	0.668801	-6.17416
ENSG00000070610	GBA2	0.0758324	1.91663	0.718631	0.473107	0.646704	-6.13323
ENSG00000070614	NDST1	-0.230448	1.92755	-1.61668	0.107337	0.247221	-5.12686
ENSG00000070669	ASNS	0.0241641	-0.304853	0.127467	0.898684	0.94576	-6.02221
ENSG00000070729	CNGB1	-0.281431	0.169186	-1.1408	0.255155	0.435991	-5.55586
ENSG00000070731	ST6GALNAC2	-0.00195631	1.39553	-0.0132441	0.989445	0.994496	-6.33544
ENSG00000070756	PABPC1	-0.178899	5.05293	-1.84891	0.0657719	0.179899	-4.77658
ENSG00000070761	CFAP20	-0.340207	-0.178599	-1.78729	0.0752245	0.196214	-4.57535
ENSG00000070770	CSNK2A2	-0.207962	0.997354	-1.78759	0.0751761	0.196139	-4.75917
ENSG00000070814	TCOF1	0.128852	0.545818	0.875482	0.382238	0.56708	-5.82784
ENSG00000070831	CDC42	0.0893121	4.7373	1.16841	0.243869	0.423244	-5.77793
ENSG00000070882	OSBPL3	0.0732209	1.28575	0.51901	0.60426	0.752763	-6.18546
ENSG00000070961	ATP2B1	-0.146191	3.83004	-0.847665	0.397518	0.58197	-6.09728
ENSG00000071051	NCK2	0.129396	1.00772	1.00088	0.317952	0.504094	-5.7901
ENSG00000071054	MAP4K4	-0.0159227	4.32199	-0.111888	0.911011	0.951823	-6.44156
ENSG00000071073	MGAT4A	0.501354	1.62829	3.11643	0.00206687	0.0179966	-1.70786
ENSG00000071082	RPL31	-0.282966	4.50839	-1.73639	0.0838519	0.209928	-4.9778
ENSG00000071127	WDR1	-0.155736	5.33455	-2.0012	0.0465618	0.143834	-4.48992
ENSG00000071189	SNX13	0.104862	1.93628	1.04689	0.296266	0.481499	-5.85017
ENSG00000071205	ARHGAP10	-0.638287	-0.145228	-4.37181	1.87695e-05	0.000651193	2.63849
ENSG00000071243	ING3	0.433905	0.486099	2.88567	0.00428247	0.0294595	-2.22024
ENSG00000071246	VASH1	0.162588	0.676545	0.935449	0.350551	0.535427	-5.79769
ENSG00000071462	BUD23	-0.332003	1.2741	-2.34607	0.0198346	0.0808896	-3.69789
ENSG00000071537	SEL1L	0.0568425	2.41295	0.436433	0.662937	0.795363	-6.3243
ENSG00000071553	ATP6AP1	0.0565879	3.81192	0.414888	0.678616	0.805243	-6.36415
ENSG00000071564	TCF3	-0.111653	1.39413	-0.685346	0.493825	0.665738	-6.11489
ENSG00000071575	TRIB2	0.503045	0.140861	2.17537	0.0306351	0.108586	-3.86183
ENSG00000071626	DAZAP1	-0.0417107	2.01594	-0.330509	0.74132	0.846346	-6.34276
ENSG00000071655	MBD3	-0.560035	0.617535	-3.60833	0.000379102	0.00538757	-0.14495
ENSG00000071859	FAM50A	-0.160993	2.72689	-1.30094	0.194597	0.364601	-5.60909
ENSG00000071889	FAM3A	-0.115955	0.328137	-0.772344	0.440714	0.620213	-5.9095
ENSG00000071894	CPSF1	-0.102445	1.24723	-0.748835	0.454732	0.632168	-6.05813
ENSG00000071994	PDCD2	-0.262112	0.306611	-1.73439	0.0842064	0.210441	-4.757
ENSG00000072042	RDH11	-0.0576383	0.333781	-0.382108	0.702739	0.821709	-6.09681
ENSG00000072062	PRKACA	-0.0130177	2.49869	-0.120529	0.904171	0.948808	-6.41353
ENSG00000072071	ADGRL1	-0.264361	-0.0147735	-1.59324	0.112498	0.25558	-4.92937
ENSG00000072080	SPP2	-0.652368	-0.385246	-2.17558	0.0306196	0.10858	-3.85843
ENSG00000072110	ACTN1	-0.00403163	4.84285	-0.0400348	0.968101	0.980984	-6.44174
ENSG00000072121	ZFYVE26	0.24798	1.83502	1.80848	0.0718562	0.190353	-4.78913
ENSG00000072134	EPN2	-0.437852	0.62241	-2.1279	0.0344241	0.117135	-4.08712
ENSG00000072135	PTPN18	-0.121984	2.06434	-1.11569	0.265735	0.448081	-5.79697
ENSG00000072210	ALDH3A2	-0.614726	0.942601	-4.16996	4.33686e-05	0.00116327	1.81783
ENSG00000072274	TFRC	-0.620862	3.84211	-3.69861	0.000271971	0.0043392	0.0542611
ENSG00000072310	SREBF1	0.134421	2.80472	1.31903	0.188489	0.356961	-5.58299
ENSG00000072364	AFF4	0.0471436	2.8707	0.556692	0.578287	0.734252	-6.28335
ENSG00000072401	UBE2D1	0.429206	3.0579	3.45734	0.000651229	0.00799742	-0.73499
ENSG00000072415	MPP5	0.11732	0.046011	0.770296	0.441925	0.621296	-5.81592
ENSG00000072501	SMC1A	0.248635	1.17311	1.63358	0.103734	0.240658	-5.00358
ENSG00000072506	HSD17B10	-0.262287	0.394473	-1.51457	0.131274	0.282337	-5.11524
ENSG00000072518	MARK2	0.140651	3.10985	1.61961	0.106704	0.246052	-5.16283
ENSG00000072609	CHFR	0.0105859	3.005	0.110865	0.911822	0.952459	-6.43196
ENSG00000072682	P4HA2	-0.754106	0.92802	-3.84697	0.000155429	0.00297096	0.641586
ENSG00000072694	FCGR2B	0.822566	2.33749	4.19577	3.90312e-05	0.00107625	1.88499
ENSG00000072736	NFATC3	0.243146	0.839817	2.21631	0.0276627	0.101445	-3.89054
ENSG00000072756	TRNT1	0.126762	0.680428	0.765005	0.445064	0.623926	-5.93776
ENSG00000072778	ACADVL	-0.306776	3.92569	-2.52145	0.0123736	0.0597491	-3.37803
ENSG00000072786	STK10	-0.0974239	4.72436	-0.787919	0.431566	0.6118	-6.13956
ENSG00000072803	FBXW11	-0.105493	1.79003	-0.837325	0.403291	0.586843	-6.039
ENSG00000072818	ACAP1	0.290462	3.29571	2.04163	0.0423453	0.135216	-4.4181
ENSG00000072849	DERL2	0.0156295	1.5803	0.115497	0.908153	0.950745	-6.34482
ENSG00000072858	SIDT1	-0.494987	-0.173936	-2.50227	0.0130451	0.0619355	-3.16991
ENSG00000072864	NDE1	0.0524459	2.36515	0.520694	0.603088	0.752092	-6.28116
ENSG00000072952	MRVI1	-0.0072665	0.707155	-0.0391378	0.968815	0.981376	-6.22867
ENSG00000072958	AP1M1	-0.0562658	2.20021	-0.459245	0.646498	0.784343	-6.30421
ENSG00000073008	PVR	-0.571409	-0.0915894	-3.84376	0.000157352	0.00299029	0.706877
ENSG00000073050	XRCC1	0.219834	0.345317	1.47564	0.141427	0.295962	-5.11599
ENSG00000073060	SCARB1	-0.674994	0.0564388	-4.31907	2.34283e-05	0.000751232	2.43006
ENSG00000073169	SELENOO	0.0433588	0.290374	0.298034	0.76595	0.863628	-6.12019
ENSG00000073331	ALPK1	0.123333	3.39542	0.780731	0.435775	0.615185	-6.14638
ENSG00000073350	LLGL2	-0.411396	0.724671	-1.98549	0.0482939	0.147356	-4.38624
ENSG00000073417	PDE8A	-0.471911	1.02448	-2.99986	0.00300246	0.0230547	-2.03087
ENSG00000073578	SDHA	-0.0831016	1.8963	-0.728952	0.466783	0.641489	-6.12996
ENSG00000073584	SMARCE1	0.220563	1.62934	1.99503	0.0472358	0.145264	-4.42439
ENSG00000073614	KDM5A	0.0131289	2.76756	0.128488	0.897877	0.945113	-6.42341
ENSG00000073737	DHRS9	0.386212	1.4236	1.82715	0.0689908	0.185813	-4.70356
ENSG00000073756	PTGS2	-0.123885	5.01283	-0.427112	0.669703	0.799776	-6.34932
ENSG00000073792	IGF2BP2	-0.493851	0.99952	-2.49816	0.0131932	0.0623791	-3.32978
ENSG00000073803	MAP3K13	-0.0342581	1.27995	-0.231434	0.817186	0.898036	-6.2968
ENSG00000073849	ST6GAL1	-0.123948	1.44986	-0.866825	0.386954	0.571519	-5.98928
ENSG00000073910	FRY	-0.326934	0.464177	-2.306	0.0220134	0.087038	-3.69056
ENSG00000073921	PICALM	0.247942	5.55785	2.45908	0.0146772	0.0664286	-3.51258
ENSG00000073969	NSF	0.136858	1.57263	1.10758	0.269215	0.452626	-5.75035
ENSG00000074054	CLASP1	0.21468	1.84306	1.81961	0.0701361	0.187563	-4.76834
ENSG00000074071	MRPS34	-0.205269	0.0240791	-1.06917	0.28613	0.471233	-5.59178
ENSG00000074201	CLNS1A	-0.0516563	1.54838	-0.361332	0.718187	0.831648	-6.29376
ENSG00000074319	TSG101	0.210747	2.36449	1.89901	0.0588315	0.167454	-4.66134
ENSG00000074356	NCBP3	-0.269065	0.938694	-2.00352	0.0463105	0.143269	-4.36397
ENSG00000074370	ATP2A3	0.280161	2.74487	1.80951	0.071695	0.190182	-4.83481
ENSG00000074416	MGLL	-0.394677	2.30326	-1.83476	0.0678499	0.183897	-4.78987
ENSG00000074603	DPP8	0.135561	1.2219	1.20817	0.22824	0.405286	-5.59935
ENSG00000074621	SLC24A1	0.0644469	0.320527	0.376485	0.706908	0.824024	-6.09975
ENSG00000074657	ZNF532	-0.51386	0.372394	-2.43226	0.0157796	0.0698761	-3.40648
ENSG00000074660	SCARF1	0.444678	2.80314	2.05391	0.0411302	0.132619	-4.37993
ENSG00000074695	LMAN1	-0.173877	0.26233	-1.06423	0.288354	0.473724	-5.63018
ENSG00000074696	HACD3	-0.51513	0.200606	-3.39585	0.000807585	0.00934179	-0.781223
ENSG00000074706	IPCEF1	0.118317	1.1275	0.715432	0.475077	0.648415	-6.04887
ENSG00000074755	ZZEF1	0.0510669	2.02169	0.625739	0.532115	0.697303	-6.20114
ENSG00000074800	ENO1	-0.160276	5.07233	-1.37573	0.170263	0.334443	-5.5147
ENSG00000074842	MYDGF	-0.194819	1.87722	-1.17337	0.241876	0.421204	-5.72471
ENSG00000074935	TUBE1	-0.347515	0.434415	-1.79248	0.0743874	0.195012	-4.69254
ENSG00000074964	ARHGEF10L	0.0205787	1.85854	0.131944	0.895146	0.94355	-6.37504
ENSG00000075089	ACTR6	-0.344344	0.496242	-1.96283	0.0508874	0.152361	-4.39381
ENSG00000075142	SRI	0.119802	2.14907	0.758208	0.449113	0.626761	-6.1166
ENSG00000075151	EIF4G3	0.511284	2.96987	4.26793	2.89921e-05	0.000878299	2.13705
ENSG00000075223	SEMA3C	-0.712598	0.986098	-4.21341	3.63073e-05	0.00102704	1.97529
ENSG00000075234	TTC38	0.235767	1.11805	1.23343	0.218691	0.393811	-5.54672
ENSG00000075239	ACAT1	-0.618449	1.28251	-4.13359	5.02713e-05	0.00129887	1.66088
ENSG00000075240	GRAMD4	0.0603909	1.45	0.329328	0.742211	0.846761	-6.28525
ENSG00000075275	CELSR1	-0.34758	-0.488039	-1.72206	0.0864217	0.214044	-4.63934
ENSG00000075292	ZNF638	0.200961	3.68822	1.77502	0.0772344	0.199378	-4.91448
ENSG00000075303	SLC25A40	0.290991	0.993021	1.67917	0.0944959	0.226197	-4.90726
ENSG00000075399	VPS9D1	0.225904	3.62043	1.34148	0.181104	0.348133	-5.56874
ENSG00000075407	ZNF37A	-0.0535586	0.00113577	-0.354882	0.723008	0.834929	-6.0539
ENSG00000075413	MARK3	0.156182	3.46988	1.79546	0.0739104	0.194123	-4.87788
ENSG00000075415	SLC25A3	-0.189193	3.24613	-1.64439	0.101481	0.236893	-5.12852
ENSG00000075420	FNDC3B	0.223234	5.30309	2.16135	0.031715	0.111342	-4.17393
ENSG00000075426	FOSL2	0.0547821	5.39821	0.46289	0.643887	0.782715	-6.32916
ENSG00000075539	FRYL	0.165445	2.22793	1.55134	0.122214	0.269627	-5.23294
ENSG00000075568	TMEM131	0.327338	1.55156	2.77774	0.00593182	0.0367713	-2.64255
ENSG00000075624	ACTB	0.379668	10.0969	3.04426	0.00260782	0.0210249	-1.91989
ENSG00000075651	PLD1	0.00999485	2.28285	0.0554466	0.955831	0.974456	-6.40837
ENSG00000075711	DLG1	-0.132352	1.17791	-1.03581	0.301395	0.487261	-5.79662
ENSG00000075785	RAB7A	0.23747	5.00236	2.74886	0.00646169	0.0392163	-2.80364
ENSG00000075790	BCAP29	-0.162003	0.586513	-0.940992	0.34771	0.532591	-5.798
ENSG00000075856	SART3	-0.106303	1.39004	-0.889588	0.374629	0.559187	-5.95914
ENSG00000075884	ARHGAP15	0.377208	3.63629	2.17936	0.0303342	0.108074	-4.14348
ENSG00000075914	EXOSC7	-0.433585	-0.364661	-2.35219	0.0195189	0.0802607	-3.46708
ENSG00000076043	REXO2	-0.501154	-0.206265	-2.6775	0.00795924	0.0450551	-2.74124
ENSG00000076053	RBM7	0.455012	1.81681	3.56557	0.000442686	0.00599608	-0.32747
ENSG00000076067	RBMS2	-0.172985	0.425764	-0.82631	0.409496	0.592632	-5.88051
ENSG00000076108	BAZ2A	0.19507	3.7134	1.89754	0.0590255	0.167787	-4.69785
ENSG00000076201	PTPN23	-0.172633	1.18344	-1.32888	0.185221	0.35316	-5.47255
ENSG00000076242	MLH1	0.0598352	1.25283	0.497916	0.619025	0.764695	-6.19412
ENSG00000076382	SPAG5	-0.317034	0.0602904	-1.78075	0.0762907	0.197774	-4.64534
ENSG00000076513	ANKRD13A	0.294377	2.99349	2.79752	0.00559191	0.0352187	-2.66882
ENSG00000076554	TPD52	-0.410445	0.0617849	-1.82845	0.0687954	0.185439	-4.57215
ENSG00000076555	ACACB	-0.418398	1.09898	-2.19547	0.0291429	0.105008	-4.0068
ENSG00000076604	TRAF4	-0.273583	1.06134	-1.42153	0.156536	0.317197	-5.33654
ENSG00000076641	PAG1	0.310057	3.58105	1.99282	0.0474796	0.145831	-4.51752
ENSG00000076662	ICAM3	0.793727	3.70419	4.45694	1.30657e-05	0.000490909	2.87387
ENSG00000076685	NT5C2	0.51546	4.27556	4.28369	2.7155e-05	0.000840608	2.18748
ENSG00000076924	XAB2	0.338541	0.811713	2.91927	0.00386181	0.0276248	-2.18653
ENSG00000076928	ARHGEF1	0.226522	4.27154	2.03555	0.0429575	0.136455	-4.43751
ENSG00000076944	STXBP2	0.543509	6.65558	3.81776	0.000173764	0.00319726	0.487805
ENSG00000076984	MAP2K7	-0.328613	0.587044	-2.46685	0.014371	0.065616	-3.34827
ENSG00000077044	DGKD	-0.100853	2.67772	-0.635037	0.526044	0.692204	-6.23348
ENSG00000077097	TOP2B	0.109922	1.15794	0.945701	0.345307	0.529883	-5.86509
ENSG00000077147	TM9SF3	0.181449	2.16738	1.64954	0.100421	0.235143	-5.07577
ENSG00000077150	NFKB2	0.123918	4.98254	0.88906	0.374912	0.559331	-6.0553
ENSG00000077157	PPP1R12B	-0.303486	0.509277	-1.71762	0.0872298	0.215404	-4.81636
ENSG00000077232	DNAJC10	-0.0175744	0.687067	-0.110207	0.912343	0.952599	-6.23824
ENSG00000077235	GTF3C1	-0.245706	0.961286	-1.88768	0.0603448	0.170285	-4.58179
ENSG00000077238	IL4R	0.0975701	5.61885	0.712472	0.476904	0.649958	-6.18207
ENSG00000077254	USP33	0.0333409	2.31769	0.268272	0.788734	0.879508	-6.37729
ENSG00000077312	SNRPA	-0.116238	1.03404	-0.765566	0.44473	0.623775	-6.02232
ENSG00000077327	SPAG6	-0.512872	-0.759145	-2.13956	0.0334581	0.115087	-3.84962
ENSG00000077380	DYNC1I2	0.0149916	2.04735	0.113129	0.910028	0.951482	-6.3891
ENSG00000077420	APBB1IP	0.500008	3.75936	3.26248	0.00127462	0.0129221	-1.35378
ENSG00000077454	LRCH4	0.157112	3.30344	1.2818	0.201221	0.372265	-5.64141
ENSG00000077458	FAM76B	0.158654	1.42323	0.967816	0.334166	0.519756	-5.86554
ENSG00000077463	SIRT6	-0.110977	1.26115	-0.804252	0.422093	0.603808	-6.01575
ENSG00000077514	POLD3	0.166402	1.13188	1.31477	0.189914	0.358626	-5.45164
ENSG00000077549	CAPZB	0.238513	4.47454	3.21467	0.001496	0.0144098	-1.50014
ENSG00000077585	GPR137B	0.0760715	2.83751	0.544461	0.586659	0.739491	-6.2881
ENSG00000077684	JADE1	-0.211831	0.042479	-1.43268	0.153325	0.312621	-5.15258
ENSG00000077721	UBE2A	0.172643	2.47491	1.58178	0.115092	0.259556	-5.20007
ENSG00000077782	FGFR1	-0.704877	0.128734	-2.98287	0.00316751	0.0239485	-1.99962
ENSG00000077984	CST7	0.885785	4.43163	3.79022	0.00019291	0.00344504	0.37067
ENSG00000078043	PIAS2	-0.610272	0.0967114	-3.42082	0.000740287	0.00880278	-0.701343
ENSG00000078061	ARAF	0.0164158	1.82548	0.151267	0.8799	0.934988	-6.36631
ENSG00000078070	MCCC1	-0.513014	-0.039276	-2.63194	0.00907248	0.0485906	-2.88267
ENSG00000078081	LAMP3	1.10402	1.65576	3.79524	0.000189277	0.00340008	0.47896
ENSG00000078098	FAP	1.27126	0.440692	3.46683	0.0006298	0.00779843	-0.491311
ENSG00000078114	NEBL	-0.296647	-0.351082	-1.19107	0.234869	0.413014	-5.38552
ENSG00000078124	ACER3	0.117001	1.65885	0.781154	0.435526	0.615022	-6.05868
ENSG00000078140	UBE2K	0.271874	2.03554	2.07147	0.0394458	0.128748	-4.30791
ENSG00000078142	PIK3C3	0.174016	1.72733	1.44234	0.150586	0.308826	-5.34945
ENSG00000078269	SYNJ2	-0.221994	0.430108	-1.6715	0.0960017	0.228271	-4.87474
ENSG00000078304	PPP2R5C	0.0724044	4.0507	0.76479	0.445191	0.623961	-6.16248
ENSG00000078369	GNB1	0.104823	4.93197	1.29977	0.194997	0.364831	-5.61802
ENSG00000078401	EDN1	-0.302593	0.608775	-1.25134	0.212101	0.386151	-5.49661
ENSG00000078403	MLLT10	-0.398182	1.33981	-2.67224	0.00808113	0.0455644	-2.92528
ENSG00000078487	ZCWPW1	0.150908	1.44075	0.901519	0.368268	0.552712	-5.94092
ENSG00000078618	NRDC	0.11653	4.01106	1.33348	0.183711	0.351677	-5.58117
ENSG00000078668	VDAC3	0.170298	1.27124	1.23383	0.218544	0.393659	-5.57129
ENSG00000078674	PCM1	-0.0545189	2.76974	-0.489845	0.624717	0.767851	-6.31639
ENSG00000078687	TNRC6C	0.342318	0.123377	2.23805	0.0261886	0.0981495	-3.72323
ENSG00000078699	CBFA2T2	-0.0857577	0.192484	-0.665336	0.506511	0.676723	-5.94704
ENSG00000078747	ITCH	0.16094	2.46425	1.49775	0.135588	0.288278	-5.32358
ENSG00000078804	TP53INP2	-0.0558305	1.91394	-0.377083	0.706464	0.824024	-6.32101
ENSG00000078808	SDF4	-0.0223248	3.14746	-0.217082	0.828339	0.903823	-6.41891
ENSG00000078814	MYH7B	-0.154291	-0.232114	-0.972004	0.332083	0.517907	-5.61705
ENSG00000078902	TOLLIP	-0.184652	2.52355	-1.55426	0.121516	0.26876	-5.25188
ENSG00000078967	UBE2D4	-0.706617	0.549785	-2.7065	0.0073165	0.0427694	-2.78484
ENSG00000079134	THOC1	-0.236296	0.203276	-1.32683	0.185899	0.354107	-5.31496
ENSG00000079215	SLC1A3	0.262364	2.4468	1.3856	0.167228	0.330098	-5.47713
ENSG00000079246	XRCC5	0.0756649	2.94261	0.783608	0.434087	0.613871	-6.13619
ENSG00000079263	SP140	0.624076	3.32914	2.96393	0.00336131	0.0249915	-2.21903
ENSG00000079277	MKNK1	-0.106256	4.41753	-0.815346	0.415729	0.597872	-6.12138
ENSG00000079308	TNS1	-0.425202	2.17375	-2.38869	0.0177273	0.0752101	-3.66222
ENSG00000079313	REXO1	-0.329568	1.57358	-1.7519	0.0811421	0.205851	-4.88409
ENSG00000079332	SAR1A	0.0593966	2.23944	0.587412	0.557511	0.717216	-6.24056
ENSG00000079335	CDC14A	-0.0510479	0.339158	-0.429559	0.667924	0.79888	-6.09625
ENSG00000079385	CEACAM1	0.936534	3.80726	5.21297	4.17598e-07	3.95273e-05	6.10973
ENSG00000079387	SENP1	0.284836	0.773043	2.06688	0.0398799	0.129692	-4.18012
ENSG00000079432	CIC	-0.244329	2.41836	-1.96601	0.0505171	0.151659	-4.54827
ENSG00000079459	FDFT1	-0.0183636	1.81474	-0.164946	0.869133	0.927338	-6.36556
ENSG00000079739	PGM1	-0.127381	0.253884	-0.78798	0.431531	0.6118	-5.87694
ENSG00000079785	DDX1	-0.466245	0.168418	-3.10199	0.00216597	0.0184925	-1.65047
ENSG00000079805	DNM2	-0.135027	4.54944	-1.35	0.178361	0.344756	-5.55614
ENSG00000079819	EPB41L2	-0.346421	0.305591	-2.10321	0.0365489	0.121912	-4.08739
ENSG00000079950	STX7	0.288768	2.61527	2.30892	0.0218476	0.0866859	-3.84337
ENSG00000079974	RABL2B	-0.541683	0.654442	-3.20585	0.00154054	0.0146538	-1.40671
ENSG00000079999	KEAP1	0.038368	1.38161	0.293128	0.769692	0.865656	-6.28905
ENSG00000080189	SLC35C2	0.220245	1.21228	1.91501	0.0567487	0.164093	-4.53645
ENSG00000080298	RFX3	-0.0699886	0.637537	-0.385154	0.700484	0.820083	-6.15481
ENSG00000080345	RIF1	0.281369	0.885845	2.38404	0.0179469	0.0758565	-3.53234
ENSG00000080371	RAB21	0.150793	3.08049	1.14578	0.253095	0.434356	-5.79755
ENSG00000080503	SMARCA2	-0.502108	3.20483	-2.6721	0.00808439	0.0455644	-3.00347
ENSG00000080603	SRCAP	-0.104155	1.75464	-0.968738	0.333707	0.519288	-5.92142
ENSG00000080608	PUM3	-0.209074	-0.0270313	-1.07993	0.281319	0.466231	-5.5522
ENSG00000080802	CNOT4	0.294305	0.993283	2.6369	0.00894486	0.0480922	-2.94233
ENSG00000080815	PSEN1	0.189962	4.12701	1.96802	0.0502839	0.151282	-4.56782
ENSG00000080822	CLDND1	0.354477	2.151	2.6434	0.00878003	0.0478045	-3.02638
ENSG00000080823	MOK	-0.599811	0.99265	-2.95241	0.0034844	0.0255369	-2.16782
ENSG00000080824	HSP90AA1	-0.14005	5.17754	-0.841774	0.400801	0.584789	-6.08876
ENSG00000080845	DLGAP4	-0.159033	2.35584	-1.47576	0.141393	0.295955	-5.36025
ENSG00000081019	RSBN1	0.181999	0.722341	1.06466	0.288162	0.473488	-5.67104
ENSG00000081041	CXCL2	-0.615967	4.55638	-2.49388	0.013349	0.0629045	-3.43711
ENSG00000081059	TCF7	0.349459	0.507472	1.98434	0.0484226	0.147356	-4.28408
ENSG00000081087	OSTM1	0.0634225	2.55627	0.556173	0.578641	0.734291	-6.27203
ENSG00000081154	PCNP	0.167868	2.17607	1.15588	0.248946	0.429557	-5.74871
ENSG00000081189	MEF2C	-0.104541	1.68071	-0.434352	0.664446	0.796462	-6.2763
ENSG00000081237	PTPRC	0.499267	6.56983	3.26298	0.0012725	0.0129139	-1.32972
ENSG00000081307	UBA5	-0.41325	-0.0516532	-2.31803	0.0213382	0.0851451	-3.58878
ENSG00000081320	STK17B	0.248838	3.9929	1.66986	0.0963265	0.228656	-5.09104
ENSG00000081665	ZNF506	-0.173286	0.875692	-1.24411	0.214741	0.389087	-5.53155
ENSG00000081760	AACS	-0.564672	1.14683	-3.11149	0.00210025	0.0181518	-1.72699
ENSG00000081791	DELE1	0.00235862	1.31585	0.0205256	0.983642	0.99087	-6.33114
ENSG00000081870	HSPB11	-0.191022	-0.202841	-0.979559	0.328347	0.51427	-5.61958
ENSG00000081913	PHLPP1	-0.233157	0.925123	-1.55311	0.121791	0.269056	-5.12801
ENSG00000081923	ATP8B1	-0.285762	-0.344885	-1.41671	0.15794	0.318925	-5.12256
ENSG00000082014	SMARCD3	0.56021	1.30266	2.64809	0.00866273	0.0475887	-2.92587
ENSG00000082068	WDR70	0.38952	0.286451	2.34895	0.0196853	0.0806652	-3.51134
ENSG00000082074	FYB1	0.858961	5.09315	5.57931	6.84767e-08	1.05326e-05	7.81877
ENSG00000082153	BZW1	-0.0336446	3.77999	-0.317939	0.750824	0.852785	-6.39907
ENSG00000082212	ME2	0.100924	1.8665	0.955986	0.340097	0.525327	-5.93417
ENSG00000082213	C5orf22	-0.0505013	0.124528	-0.334047	0.738653	0.844776	-6.0941
ENSG00000082258	CCNT2	0.159081	1.57516	1.27955	0.20201	0.372882	-5.55216
ENSG00000082397	EPB41L3	-0.139998	2.80954	-0.988245	0.324085	0.510039	-5.95931
ENSG00000082515	MRPL22	0.287447	-0.218724	1.41516	0.158394	0.319367	-5.07518
ENSG00000082641	NFE2L1	-0.0454825	2.53427	-0.336477	0.736822	0.8436	-6.36985
ENSG00000082701	GSK3B	0.29447	1.68802	2.64501	0.00873952	0.0477424	-2.996
ENSG00000082781	ITGB5	-0.954782	-0.00626965	-4.75029	3.60222e-06	0.000195913	4.1479
ENSG00000082805	ERC1	-0.0870055	1.69379	-0.628744	0.530149	0.696117	-6.18099
ENSG00000082898	XPO1	0.0677577	2.86712	0.594225	0.552954	0.713311	-6.26131
ENSG00000082996	RNF13	0.329351	4.75267	2.92289	0.00381891	0.0274004	-2.33986
ENSG00000083099	LYRM2	-0.0485659	0.35331	-0.334638	0.738207	0.844626	-6.11913
ENSG00000083168	KAT6A	0.271258	2.89298	2.73015	0.00682747	0.0406838	-2.84303
ENSG00000083223	TUT7	0.10652	3.40208	0.841837	0.400765	0.584789	-6.0983
ENSG00000083290	ULK2	-0.353137	0.361371	-1.80459	0.0724651	0.191577	-4.64872
ENSG00000083312	TNPO1	0.0689372	2.50743	0.738599	0.460914	0.636779	-6.15451
ENSG00000083444	PLOD1	-0.192086	1.40074	-1.47475	0.141665	0.296147	-5.29315
ENSG00000083457	ITGAE	-0.345158	0.760931	-2.27743	0.0236918	0.0915673	-3.79174
ENSG00000083520	DIS3	0.148378	0.295072	1.22836	0.220583	0.396069	-5.41974
ENSG00000083535	PIBF1	0.0809398	-0.194111	0.46212	0.644438	0.783191	-5.93737
ENSG00000083642	PDS5B	0.127618	0.981514	1.17378	0.241714	0.421138	-5.59692
ENSG00000083799	CYLD	0.354904	3.08209	3.15353	0.00183103	0.0167692	-1.67327
ENSG00000083828	ZNF586	-0.109471	0.864904	-0.906246	0.365767	0.550457	-5.87367
ENSG00000083844	ZNF264	-0.359834	0.731757	-2.5289	0.0121214	0.0588959	-3.2193
ENSG00000083845	RPS5	-0.1355	3.58512	-0.769317	0.442505	0.621845	-6.15835
ENSG00000083857	FAT1	-0.111847	-0.198129	-0.531537	0.595567	0.745992	-5.94663
ENSG00000083896	YTHDC1	0.1763	2.78196	1.67575	0.0951651	0.227186	-5.06319
ENSG00000083937	CHMP2B	0.413922	2.3094	3.89463	0.000129393	0.00261941	0.769327
ENSG00000084070	SMAP2	0.214483	4.31935	1.21845	0.224319	0.401161	-5.72323
ENSG00000084072	PPIE	-0.578529	-0.097081	-3.54677	0.000473703	0.00625924	-0.282767
ENSG00000084073	ZMPSTE24	0.105998	1.08509	0.845971	0.39846	0.582743	-5.94502
ENSG00000084090	STARD7	-0.269446	1.39189	-2.04802	0.0417096	0.133873	-4.33142
ENSG00000084093	REST	-0.00395884	0.912576	-0.0361861	0.971166	0.982746	-6.27624
ENSG00000084110	HAL	-0.108485	1.52846	-0.474092	0.63589	0.776719	-6.24831
ENSG00000084112	SSH1	-0.0717667	2.03105	-0.453729	0.650457	0.786598	-6.29712
ENSG00000084207	GSTP1	-0.200192	3.62903	-0.848466	0.397073	0.581491	-6.09605
ENSG00000084234	APLP2	-0.2594	5.09155	-2.61359	0.00955892	0.0504007	-3.14228
ENSG00000084463	WBP11	-0.281909	0.893724	-2.37768	0.0182516	0.0765853	-3.58132
ENSG00000084623	EIF3I	-0.254845	2.09931	-1.99847	0.0468587	0.14442	-4.47443
ENSG00000084652	TXLNA	0.202877	0.666996	1.62606	0.105325	0.2435	-4.94831
ENSG00000084676	NCOA1	0.245966	2.49588	1.90777	0.0576828	0.165744	-4.65005
ENSG00000084733	RAB10	0.0596282	4.03841	0.56058	0.575637	0.732123	-6.29497
ENSG00000084754	HADHA	0.00388833	2.21981	0.0440349	0.964915	0.979745	-6.40632
ENSG00000084764	MAPRE3	-0.583718	-0.175616	-3.31747	0.00105783	0.0112698	-0.989538
ENSG00000084774	CAD	-0.625456	-0.189401	-3.55303	0.000463144	0.00619455	-0.25677
ENSG00000085063	CD59	0.1393	3.51397	1.06854	0.286411	0.471476	-5.88805
ENSG00000085117	CD82	-0.0133765	5.0263	-0.0868021	0.930905	0.962174	-6.43601
ENSG00000085224	ATRX	0.135962	2.39845	1.00433	0.316288	0.502631	-5.92075
ENSG00000085231	AK6	-0.460913	0.621025	-2.64023	0.00886012	0.0479498	-2.93562
ENSG00000085265	FCN1	0.44968	2.04082	2.7466	0.00650485	0.039373	-2.75344
ENSG00000085276	MECOM	-0.259082	-0.320614	-1.11259	0.26706	0.449798	-5.49439
ENSG00000085365	SCAMP1	0.0789324	0.371382	0.597068	0.551057	0.711891	-5.99627
ENSG00000085415	SEH1L	-0.388373	0.17663	-2.82714	0.00511607	0.033177	-2.40102
ENSG00000085433	WDR47	-0.0528798	0.282621	-0.35032	0.726424	0.836658	-6.0995
ENSG00000085449	WDFY1	0.159266	2.79791	1.11495	0.266051	0.448459	-5.82397
ENSG00000085491	SLC25A24	0.117504	1.21285	0.893204	0.372694	0.557106	-5.92078
ENSG00000085511	MAP3K4	-0.354161	0.0577728	-2.00768	0.0458627	0.142241	-4.23342
ENSG00000085514	PILRA	0.155307	4.3721	1.10314	0.271133	0.454613	-5.85348
ENSG00000085662	AKR1B1	-0.887902	1.03428	-4.6434	5.80192e-06	0.000264417	3.67234
ENSG00000085719	CPNE3	0.0393453	1.37113	0.2353	0.814188	0.895916	-6.30241
ENSG00000085721	RRN3	0.0352018	0.258177	0.234409	0.814879	0.896376	-6.11962
ENSG00000085733	CTTN	-0.423258	0.499082	-1.75787	0.0801183	0.204375	-4.75784
ENSG00000085788	DDHD2	-0.308279	0.17585	-1.72396	0.0860772	0.213491	-4.7514
ENSG00000085831	TTC39A	0.0589784	-0.40475	0.280936	0.779016	0.872824	-5.96641
ENSG00000085832	EPS15	0.0899681	2.12065	0.943137	0.346614	0.531475	-5.96484
ENSG00000085871	MGST2	-0.257738	0.000831857	-1.44623	0.149491	0.307286	-5.1299
ENSG00000085872	CHERP	-0.142679	0.905975	-1.34878	0.178751	0.345161	-5.40693
ENSG00000085978	ATG16L1	-0.225098	0.744719	-1.47781	0.140846	0.295187	-5.20613
ENSG00000085982	USP40	-0.393487	0.0693993	-1.90265	0.0583516	0.166884	-4.44653
ENSG00000085998	POMGNT1	-0.367609	-0.334833	-1.85423	0.065004	0.178344	-4.45511
ENSG00000086015	MAST2	-0.445618	0.193062	-3.14814	0.00186364	0.0169554	-1.52132
ENSG00000086061	DNAJA1	0.423628	4.28378	3.45008	0.000668097	0.00815974	-0.768845
ENSG00000086062	B4GALT1	0.121422	3.21886	1.07628	0.282944	0.46778	-5.87623
ENSG00000086065	CHMP5	0.717765	2.62702	5.35169	2.12766e-07	2.45867e-05	6.75576
ENSG00000086102	NFX1	-0.258384	1.0212	-2.36793	0.0187276	0.0779512	-3.61754
ENSG00000086200	IPO11	0.494298	1.75828	2.49358	0.0133598	0.0629252	-3.35652
ENSG00000086232	EIF2AK1	0.135378	1.10305	1.05038	0.294661	0.479738	-5.75314
ENSG00000086300	SNX10	0.376644	4.44262	2.40571	0.0169426	0.0733435	-3.64941
ENSG00000086504	MRPL28	-0.0396689	1.1179	-0.315507	0.752666	0.854486	-6.25462
ENSG00000086544	ITPKC	-0.366844	0.968414	-2.1966	0.0290615	0.104753	-3.99008
ENSG00000086548	CEACAM6	0.315355	1.4229	1.09277	0.275654	0.459765	-5.7438
ENSG00000086589	RBM22	0.185691	1.89246	1.85939	0.0642656	0.177434	-4.70212
ENSG00000086598	TMED2	-0.011317	2.6634	-0.0816618	0.934988	0.964424	-6.4259
ENSG00000086619	ERO1B	0.242946	0.216132	1.64886	0.100559	0.235355	-4.83097
ENSG00000086666	ZFAND6	0.128917	3.16085	1.23689	0.217408	0.392321	-5.69473
ENSG00000086730	LAT2	0.375809	3.77996	3.10772	0.00212613	0.0182792	-1.81638
ENSG00000086758	HUWE1	-0.079639	2.37953	-0.790343	0.430153	0.610939	-6.11396
ENSG00000086848	ALG9	-0.734069	0.461889	-4.17709	4.21264e-05	0.0011424	1.86957
ENSG00000087008	ACOX3	0.131069	0.404673	0.91429	0.361535	0.546608	-5.77423
ENSG00000087074	PPP1R15A	0.145022	6.47652	0.952132	0.342043	0.527011	-5.96993
ENSG00000087077	TRIP6	-0.330701	0.445716	-2.18787	0.0296998	0.106431	-3.94338
ENSG00000087086	FTL	-0.23249	9.56394	-1.69818	0.090845	0.220272	-4.94587
ENSG00000087087	SRRT	-0.163874	2.49146	-1.53151	0.127037	0.276486	-5.28349
ENSG00000087088	BAX	-0.205657	2.61958	-1.44048	0.151111	0.309517	-5.4211
ENSG00000087111	PIGS	0.107591	1.00746	0.854785	0.393571	0.577802	-5.92827
ENSG00000087152	ATXN7L3	0.0454792	2.67167	0.452065	0.651654	0.787682	-6.32767
ENSG00000087157	PGS1	0.236866	4.41909	1.69549	0.0913533	0.221117	-5.04874
ENSG00000087191	PSMC5	-0.18702	1.88844	-1.50735	0.133112	0.285107	-5.28983
ENSG00000087206	UIMC1	-0.0246226	2.0553	-0.177211	0.859501	0.92177	-6.38267
ENSG00000087237	CETP	0.783606	-0.0390137	4.24421	3.19824e-05	0.000945449	2.16245
ENSG00000087253	LPCAT2	0.685941	2.98592	4.23385	3.33796e-05	0.000972031	2.00853
ENSG00000087263	OGFOD1	-0.1114	0.0556085	-0.686783	0.49292	0.664973	-5.89882
ENSG00000087266	SH3BP2	0.0581615	5.03315	0.423218	0.672537	0.800829	-6.35256
ENSG00000087274	ADD1	0.0571928	3.3856	0.671052	0.50287	0.673595	-6.22474
ENSG00000087302	RTRAF	-0.137004	1.84432	-0.984274	0.326029	0.512279	-5.91293
ENSG00000087338	GMCL1	0.250617	0.982666	1.70595	0.0893849	0.218176	-4.86001
ENSG00000087365	SF3B2	-0.0425708	3.06058	-0.492844	0.6226	0.76678	-6.32138
ENSG00000087460	GNAS	0.0149757	5.04937	0.1491	0.881607	0.936234	-6.42877
ENSG00000087470	DNM1L	0.000426357	1.5335	0.003398	0.997292	0.998611	-6.35395
ENSG00000087502	ERGIC2	0.138177	1.5772	0.865228	0.387827	0.572465	-5.98663
ENSG00000087589	CASS4	0.259638	0.51545	1.13858	0.256081	0.437042	-5.5569
ENSG00000087884	AAMDC	-0.18911	0.482393	-0.899986	0.369082	0.553679	-5.82423
ENSG00000087903	RFX2	-0.0478793	2.85886	-0.333538	0.739036	0.845054	-6.38082
ENSG00000088038	CNOT3	0.239419	2.03329	1.93451	0.0542933	0.159393	-4.5748
ENSG00000088205	DDX18	-0.0327629	1.26352	-0.292003	0.770551	0.866298	-6.28273
ENSG00000088247	KHSRP	-0.182485	2.59918	-1.39586	0.16412	0.32612	-5.47971
ENSG00000088256	GNA11	-0.475832	0.417887	-2.13009	0.0342403	0.11669	-4.06055
ENSG00000088280	ASAP3	-0.541443	0.425423	-2.72063	0.00702062	0.0413591	-2.72177
ENSG00000088298	EDEM2	0.159792	1.5573	1.25352	0.211306	0.385204	-5.58671
ENSG00000088367	EPB41L1	-1.00441	-0.699255	-4.25899	3.00863e-05	0.000908495	2.21819
ENSG00000088387	DOCK9	-0.288361	-0.152588	-1.38062	0.168755	0.332445	-5.19615
ENSG00000088448	ANKRD10	0.677978	4.83465	3.61047	0.000376156	0.00537428	-0.242483
ENSG00000088682	COQ9	-0.191535	0.0374383	-1.16354	0.245832	0.425751	-5.48196
ENSG00000088727	KIF9	-0.655742	-0.592164	-3.53398	0.000495947	0.00646636	-0.286443
ENSG00000088766	CRLS1	-0.631767	0.121734	-3.71518	0.000255714	0.00415387	0.257714
ENSG00000088808	PPP1R13B	-0.565598	-0.0863448	-2.98753	0.00312148	0.0237648	-1.95401
ENSG00000088826	SMOX	-0.466173	0.356045	-2.73109	0.00680858	0.0405958	-2.68544
ENSG00000088827	SIGLEC1	1.0044	1.97968	3.46705	0.000629313	0.00779843	-0.640155
ENSG00000088832	FKBP1A	0.145185	4.75129	1.49185	0.137127	0.290171	-5.36016
ENSG00000088833	NSFL1C	-0.108995	2.59115	-1.12496	0.261795	0.443834	-5.81109
ENSG00000088836	SLC4A11	-0.42098	-0.291474	-1.43384	0.152994	0.312204	-5.12832
ENSG00000088930	XRN2	0.465424	1.97643	3.58342	0.000415004	0.00573778	-0.278867
ENSG00000088986	DYNLL1	-0.178101	3.30253	-0.984145	0.326092	0.512297	-5.97226
ENSG00000088992	TESC	0.787869	0.495655	3.30251	0.00111314	0.011707	-1.02116
ENSG00000089006	SNX5	-0.319228	1.92502	-3.16893	0.00174064	0.0161497	-1.60142
ENSG00000089009	RPL6	-0.172559	4.0723	-1.20228	0.230508	0.407822	-5.7427
ENSG00000089022	MAPKAPK5	-0.20263	0.40532	-1.4633	0.144769	0.300972	-5.17542
ENSG00000089041	P2RX7	0.350446	1.98921	1.78956	0.0748579	0.195672	-4.83026
ENSG00000089053	ANAPC5	-0.120898	1.89109	-1.14226	0.254552	0.435414	-5.75512
ENSG00000089057	SLC23A2	0.384541	0.516575	2.49025	0.0134823	0.06317	-3.23304
ENSG00000089060	SLC8B1	-0.0935945	2.10144	-0.836418	0.403799	0.587323	-6.0625
ENSG00000089063	TMEM230	-0.256248	1.27395	-2.07038	0.0395486	0.128934	-4.27308
ENSG00000089094	KDM2B	-0.130079	0.786922	-0.991026	0.322728	0.508635	-5.79388
ENSG00000089101	CFAP61	-0.686638	-1.11971	-2.82333	0.00517515	0.033428	-2.28273
ENSG00000089127	OAS1	1.43729	4.20855	5.03628	9.67526e-07	7.41019e-05	5.31778
ENSG00000089154	GCN1	-0.291909	1.26392	-1.69844	0.0907949	0.220253	-4.94285
ENSG00000089157	RPLP0	-0.304493	4.05006	-1.74968	0.0815254	0.206414	-4.95877
ENSG00000089159	PXN	0.269085	4.2346	1.89107	0.0598892	0.169317	-4.7106
ENSG00000089220	PEBP1	-0.464672	1.42623	-3.58551	0.000411881	0.00570731	-0.273032
ENSG00000089248	ERP29	-0.0304718	1.53445	-0.236265	0.81344	0.895448	-6.32815
ENSG00000089280	FUS	-0.109944	4.11386	-1.41167	0.159416	0.320721	-5.47664
ENSG00000089289	IGBP1	0.322492	0.768762	2.60789	0.0097148	0.0508954	-2.98019
ENSG00000089327	FXYD5	0.0851701	3.46316	0.658342	0.510986	0.680846	-6.23392
ENSG00000089335	ZNF302	-0.438496	-0.314691	-2.25274	0.0252319	0.0959008	-3.69714
ENSG00000089351	GRAMD1A	0.171777	5.58365	0.967962	0.334094	0.519756	-5.97392
ENSG00000089356	FXYD3	-0.181678	0.676288	-0.583486	0.560146	0.719196	-6.08429
ENSG00000089486	CDIP1	-0.292831	0.386314	-1.78682	0.075302	0.196312	-4.68356
ENSG00000089505	CMTM1	0.547577	1.25088	2.50067	0.0131028	0.0620113	-3.28312
ENSG00000089597	GANAB	-0.130058	2.25967	-1.20787	0.228355	0.405398	-5.70304
ENSG00000089639	GMIP	0.218987	3.92376	1.69308	0.0918125	0.221683	-5.05315
ENSG00000089692	LAG3	0.759575	0.236096	2.54775	0.0115031	0.0568744	-3.01992
ENSG00000089693	MLF2	0.00152131	2.92134	0.0141132	0.988752	0.994265	-6.43675
ENSG00000089737	DDX24	-0.297946	1.73972	-2.49037	0.0134779	0.06317	-3.39962
ENSG00000089775	ZBTB25	-0.0122844	0.0693376	-0.0886914	0.929405	0.961541	-6.11755
ENSG00000089818	NECAP1	0.424235	2.52611	3.55568	0.00045875	0.00615926	-0.400407
ENSG00000089820	ARHGAP4	0.275842	3.31483	2.01739	0.0448324	0.14011	-4.46655
ENSG00000089876	DHX32	-0.589487	-0.417572	-2.9642	0.00335847	0.0249892	-1.96618
ENSG00000089902	RCOR1	0.143376	1.73888	1.15722	0.248397	0.428912	-5.71121
ENSG00000089916	GPATCH2L	0.0280267	2.14271	0.260522	0.794698	0.882958	-6.36835
ENSG00000090006	LTBP4	-0.546797	0.906447	-2.64758	0.00867535	0.0475887	-2.95516
ENSG00000090013	BLVRB	-0.0448525	2.18529	-0.27765	0.781534	0.874714	-6.37108
ENSG00000090020	SLC9A1	0.0890108	1.31192	0.764298	0.445483	0.624112	-6.03689
ENSG00000090054	SPTLC1	-0.138187	2.23337	-1.13067	0.25939	0.440551	-5.79015
ENSG00000090060	PAPOLA	0.0678609	3.83634	0.805367	0.421451	0.603281	-6.13117
ENSG00000090061	CCNK	0.161251	2.17193	1.69478	0.0914892	0.221282	-5.00512
ENSG00000090104	RGS1	0.116754	2.823	0.552838	0.580919	0.735589	-6.28218
ENSG00000090238	YPEL3	0.283497	3.65329	1.66338	0.0976169	0.230783	-5.09923
ENSG00000090263	MRPS33	-0.433941	-0.36471	-2.11983	0.0351066	0.11888	-3.9468
ENSG00000090266	NDUFB2	-0.449212	2.46368	-3.10884	0.0021184	0.0182446	-1.8
ENSG00000090273	NUDC	-0.503822	1.45126	-3.37644	0.000863814	0.00980612	-0.948583
ENSG00000090316	MAEA	-0.115896	3.51096	-0.834968	0.404614	0.587869	-6.10631
ENSG00000090339	ICAM1	0.332267	5.16013	2.55179	0.0113744	0.0564361	-3.29829
ENSG00000090372	STRN4	-0.209256	2.87884	-2.0171	0.0448625	0.14011	-4.46394
ENSG00000090376	IRAK3	0.22775	4.35583	1.23324	0.218763	0.393837	-5.70545
ENSG00000090382	LYZ	-0.0673821	6.12555	-0.411189	0.681322	0.807266	-6.33467
ENSG00000090432	MUL1	0.0820156	-0.0952402	0.579794	0.562628	0.721349	-5.90826
ENSG00000090487	SPG21	0.173898	2.92321	1.779	0.0765788	0.198327	-4.89634
ENSG00000090520	DNAJB11	-0.0201072	1.78349	-0.149193	0.881534	0.936234	-6.36923
ENSG00000090581	GNPTG	-0.1809	2.24434	-1.41364	0.158839	0.319999	-5.44285
ENSG00000090615	GOLGA3	-0.166815	1.27941	-1.20537	0.229314	0.40666	-5.63233
ENSG00000090621	PABPC4	-0.29971	2.68361	-2.27287	0.0239699	0.0922797	-3.93421
ENSG00000090661	CERS4	-0.435027	0.78457	-2.67919	0.00792049	0.0449391	-2.86125
ENSG00000090674	MCOLN1	-0.39189	3.41963	-3.10989	0.00211125	0.0182149	-1.81078
ENSG00000090686	USP48	-0.0163123	1.51049	-0.134427	0.893184	0.942731	-6.34046
ENSG00000090857	PDPR	-0.0794293	0.67411	-0.697539	0.486179	0.658677	-6.00868
ENSG00000090861	AARS1	-0.249315	0.852319	-1.69047	0.0923107	0.222428	-4.91442
ENSG00000090863	GLG1	0.0882853	2.05441	0.898218	0.370021	0.554666	-6.00176
ENSG00000090905	TNRC6A	0.0594887	1.07604	0.371029	0.710962	0.827271	-6.223
ENSG00000090924	PLEKHG2	0.144904	3.7174	0.795761	0.427002	0.608132	-6.13735
ENSG00000090989	EXOC1	0.325431	1.16966	2.52299	0.0123214	0.0596027	-3.23917
ENSG00000091039	OSBPL8	0.0732748	3.46655	0.644146	0.520131	0.687733	-6.24276
ENSG00000091073	DTX2	-0.124768	3.35101	-1.20111	0.230959	0.408294	-5.74168
ENSG00000091106	NLRC4	0.685594	1.64143	3.75868	0.000217289	0.00367878	0.343433
ENSG00000091136	LAMB1	-0.624629	0.342988	-3.39959	0.000797158	0.00928666	-0.790934
ENSG00000091140	DLD	-0.171628	1.72072	-1.26425	0.207438	0.380052	-5.60108
ENSG00000091157	WDR7	0.149401	0.892394	0.987435	0.324481	0.510313	-5.78681
ENSG00000091164	TXNL1	0.0890463	1.35176	0.780701	0.435792	0.615185	-6.0303
ENSG00000091317	CMTM6	0.362094	4.12614	3.21547	0.00149198	0.0143991	-1.49832
ENSG00000091409	ITGA6	-0.117902	-0.272489	-0.634491	0.526399	0.692486	-5.87736
[truncated: 8,724 more rows]

## Sheet: D (bacterial LRTI v IPC)
ENSEMBL_ID	gene_symbol	logFC	AveExpr	t	P.Value	adj.P.Val	B
[truncated: 9,844 more rows]

[truncated: 2 more sheets: E (viral IPC v CTRL), F (bacterial IPC v CTRL)]
