# Supplementary material for: Host–microbiome archetypes differentiate infection from pathogen carriage in the human lower airway
Source: Nat Commun. 2026 Apr 13;17:5149. doi: 10.1038/s41467-026-71863-5 (PMC13250161; doi:10.1038/s41467-026-71863-5)
Supplement: Supplementary file 9 — Supplementary Data 7 [file 41467_2026_71863_MOESM9_ESM.xlsx]

## Sheet: A (LRTI v CTRL)
ENSEMBL_ID	gene_symbol	logFC	AveExpr	t	P.Value	adj.P.Val	B
ENSG00000000419	DPM1	0.446348	0.92227	2.75088	0.00636377	0.0306482	-2.84194
ENSG00000000938	FGR	0.275715	5.67963	1.87971	0.061272	0.153593	-4.9544
ENSG00000001036	FUCA2	-0.107776	0.803225	-0.740261	0.459814	0.620336	-6.2535
ENSG00000001084	GCLC	-0.223467	0.87469	-1.05393	0.292898	0.455064	-5.99935
ENSG00000001167	NFYA	0.261138	1.13577	1.63572	0.103115	0.221098	-5.22952
ENSG00000001626	CFTR	0.760433	1.67127	1.86073	0.0639181	0.157894	-4.89763
ENSG00000001629	ANKIB1	0.267757	1.25019	1.45717	0.146284	0.281914	-5.51262
ENSG00000001630	CYP51A1	-0.230145	0.409642	-1.28657	0.199397	0.351075	-5.62966
ENSG00000001631	KRIT1	-0.602742	0.728921	-3.31114	0.00106167	0.00792138	-1.25351
ENSG00000002016	RAD52	0.198121	-0.459832	0.956383	0.339772	0.50588	-5.83842
ENSG00000002330	BAD	-0.153202	0.555911	-0.720224	0.472038	0.63058	-6.24232
ENSG00000002549	LAP3	0.907662	3.73893	3.32263	0.00102065	0.0076814	-1.34092
ENSG00000002586	CD99	-0.280964	3.15846	-1.8437	0.0663713	0.162124	-5.02145
ENSG00000002587	HS3ST1	-0.398163	-0.0332604	-1.44946	0.148423	0.284865	-5.34562
ENSG00000002822	MAD1L1	0.0181313	1.79603	0.0980769	0.921947	0.954628	-6.62191
ENSG00000002834	LASP1	0.0720582	3.71581	0.63307	0.527248	0.677752	-6.49855
ENSG00000002919	SNX11	0.158121	1.64503	0.953746	0.341103	0.506785	-6.15851
ENSG00000002933	TMEM176A	0.755109	1.67284	3.12473	0.00198261	0.0128654	-1.85231
ENSG00000003056	M6PR	0.0765832	3.41629	0.509415	0.610896	0.741055	-6.56419
ENSG00000003147	ICA1	-0.804581	-0.0802011	-3.41563	0.000738841	0.00596649	-0.81285
ENSG00000003393	ALS2	-0.0642803	0.132992	-0.35321	0.724219	0.827062	-6.3298
ENSG00000003400	CASP10	0.60609	1.54641	2.87458	0.0043823	0.0235734	-2.55088
ENSG00000003402	CFLAR	0.680269	6.2858	5.19642	4.12705e-07	1.57468e-05	5.99967
ENSG00000003436	TFPI	-0.573395	0.152863	-3.01539	0.00282213	0.0167659	-2.0732
ENSG00000003509	NDUFAF7	-0.0830478	-0.211108	-0.433354	0.665119	0.78403	-6.21553
ENSG00000003756	RBM5	0.107421	3.66518	0.975871	0.330041	0.494886	-6.2248
ENSG00000004059	ARF5	-0.0516919	2.72913	-0.407209	0.684191	0.798291	-6.59475
ENSG00000004142	POLDIP2	0.0894932	0.447183	0.587322	0.5575	0.700597	-6.27644
ENSG00000004399	PLXND1	-0.395487	2.55473	-2.18766	0.0295903	0.0927075	-4.33336
ENSG00000004455	AK2	0.2103	2.22666	1.43769	0.151732	0.289466	-5.63191
ENSG00000004468	CD38	0.956291	1.322	3.35421	0.000915307	0.00701189	-1.06578
ENSG00000004478	FKBP4	-0.199764	1.4508	-0.914016	0.36156	0.5268	-6.20361
ENSG00000004487	KDM1A	-0.916135	-0.135974	-5.96829	7.87236e-09	6.68064e-07	9.86676
ENSG00000004534	RBM6	0.0792698	1.78206	0.643874	0.520228	0.671711	-6.41446
ENSG00000004660	CAMKK1	0.0382026	-0.0905944	0.212109	0.832189	0.899466	-6.34584
ENSG00000004700	RECQL	-0.0708499	0.271144	-0.381031	0.703493	0.812061	-6.34968
ENSG00000004766	VPS50	-0.126036	0.00704994	-0.56974	0.569349	0.709003	-6.2198
ENSG00000004779	NDUFAB1	-0.684392	0.577956	-2.99373	0.003023	0.0176631	-2.18349
ENSG00000004838	ZMYND10	-1.23216	0.0838671	-3.92719	0.000110321	0.00145187	0.861034
ENSG00000004864	SLC25A13	0.872363	2.46718	3.41023	0.000752985	0.00605093	-1.03336
ENSG00000004866	ST7	-1.21764	-0.492937	-5.27148	2.8585e-07	1.17737e-05	6.48096
ENSG00000004897	CDC27	0.00112602	1.8069	0.00846508	0.993252	0.996695	-6.62082
ENSG00000004975	DVL2	0.0906143	1.16403	0.547564	0.584464	0.720858	-6.42422
ENSG00000005001	PRSS22	-0.155839	0.185288	-0.505017	0.613977	0.743327	-6.31473
ENSG00000005007	UPF1	-0.13032	2.41181	-1.07314	0.284207	0.446068	-6.10091
ENSG00000005020	SKAP2	0.122173	3.37811	0.756976	0.449754	0.610925	-6.40863
ENSG00000005022	SLC25A5	-0.589201	2.3454	-3.55676	0.000446475	0.00403244	-0.571014
ENSG00000005059	MCUB	-0.0911172	1.18212	-0.452633	0.651193	0.772889	-6.46686
ENSG00000005075	POLR2J	-0.00589168	1.42917	-0.0374554	0.970151	0.982046	-6.59628
ENSG00000005156	LIG3	-0.185917	1.01591	-1.0514	0.294056	0.456471	-6.00543
ENSG00000005175	RPAP3	-0.238763	0.247427	-1.08761	0.277779	0.438847	-5.82941
ENSG00000005187	ACSM3	0.16682	0.84785	0.671441	0.502539	0.657758	-6.2771
ENSG00000005194	CIAPIN1	-0.067412	-0.0571251	-0.331605	0.740457	0.839076	-6.29842
ENSG00000005206	SPPL2B	-0.378953	0.944742	-1.89873	0.0587133	0.148809	-4.80007
ENSG00000005238	FAM214B	-0.166951	1.77036	-1.01639	0.310396	0.474183	-6.12037
ENSG00000005302	MSL3	0.316765	2.79097	2.01237	0.045218	0.124267	-4.6793
ENSG00000005339	CREBBP	0.188752	4.38497	0.928989	0.353762	0.519611	-6.27211
ENSG00000005379	TSPOAP1	0.441671	1.30756	1.77333	0.0773513	0.180737	-5.0285
ENSG00000005448	WDR54	-1.12238	-0.80094	-4.56015	7.89873e-06	0.000173174	3.40321
ENSG00000005483	KMT2E	0.557244	3.73806	4.23062	3.23867e-05	0.000541281	1.85758
ENSG00000005486	RHBDD2	-0.410428	2.84795	-2.60934	0.00960053	0.0412337	-3.36349
ENSG00000005700	IBTK	-0.365323	0.120238	-2.53793	0.011739	0.0471091	-3.30385
ENSG00000005801	ZNF195	-0.359249	0.00678252	-1.58996	0.113066	0.23581	-5.17934
ENSG00000005810	MYCBP2	0.345214	1.99639	2.48812	0.0134726	0.0522966	-3.61108
ENSG00000005812	FBXL3	0.327514	1.45403	2.07076	0.0393737	0.113232	-4.4815
ENSG00000005844	ITGAL	-0.00709023	3.09563	-0.0462624	0.963137	0.978772	-6.68597
ENSG00000005884	ITGA3	-1.12958	-0.120804	-4.78038	2.93965e-06	7.94999e-05	4.2727
ENSG00000005889	ZFX	0.524811	2.25066	3.37225	0.000859773	0.00667477	-1.15875
ENSG00000005893	LAMP2	0.208182	3.35165	1.33056	0.184508	0.332067	-5.81735
ENSG00000006007	GDE1	-0.43613	0.611742	-2.43925	0.0153911	0.0578282	-3.60935
ENSG00000006015	REX1BD	-0.651984	0.713633	-3.50056	0.000546706	0.004725	-0.654673
ENSG00000006118	TMEM132A	0.202742	0.812159	1.04196	0.298403	0.461287	-5.99046
ENSG00000006125	AP2B1	0.321911	3.07221	2.41741	0.0163241	0.0603904	-3.82598
ENSG00000006194	ZNF263	0.0918557	0.0217649	0.577558	0.564065	0.705817	-6.22699
ENSG00000006282	SPATA20	-0.291277	0.172635	-1.8006	0.0729319	0.173668	-4.86217
ENSG00000006327	TNFRSF12A	-0.785127	0.781391	-3.18691	0.0016149	0.0109863	-1.66237
ENSG00000006451	RALA	0.217497	1.7523	1.21553	0.225274	0.382307	-5.88497
ENSG00000006453	BAIAP2L1	0.0975758	0.73869	0.57535	0.565555	0.707142	-6.34852
ENSG00000006459	KDM7A	0.167133	1.06305	1.06743	0.286775	0.448578	-5.96444
ENSG00000006530	AGK	0.009686	1.21024	0.0622455	0.950415	0.971839	-6.56195
ENSG00000006534	ALDH3B1	-0.653619	1.62712	-3.82777	0.00016228	0.00193659	0.394011
ENSG00000006576	PHTF2	0.241467	-0.146271	1.27405	0.203789	0.356382	-5.51737
ENSG00000006607	FARP2	-0.640597	0.649462	-2.83867	0.00489007	0.0252866	-2.63722
ENSG00000006634	DBF4	0.476542	-0.26107	1.92754	0.0550087	0.142314	-4.48369
ENSG00000006652	IFRD1	0.423604	4.15107	2.33886	0.0201051	0.0697099	-4.02133
ENSG00000006712	PAF1	0.431628	2.61015	3.15567	0.00179094	0.0119364	-1.83959
ENSG00000006715	VPS41	-0.190108	1.89033	-1.18309	0.237861	0.397876	-5.94625
ENSG00000006744	ELAC2	-0.454843	0.600894	-2.41493	0.016433	0.0607397	-3.67047
ENSG00000006747	SCIN	-0.393009	-0.0464314	-1.62856	0.104624	0.223071	-5.06946
ENSG00000006756	ARSD	-0.61557	0.331709	-4.39194	1.63998e-05	0.000310461	2.63679
ENSG00000006831	ADIPOR2	0.0367862	1.4693	0.240742	0.809946	0.886027	-6.56985
ENSG00000006837	CDKL3	0.216968	-0.23493	0.925505	0.355567	0.521406	-5.87865
ENSG00000007047	MARK4	-0.00763867	1.5497	-0.0527152	0.958	0.975913	-6.60789
ENSG00000007062	PROM1	-1.73356	-0.493768	-6.28712	1.36976e-09	1.70682e-07	11.5241
ENSG00000007080	CCDC124	-0.591029	1.13404	-3.49973	0.000548336	0.00473493	-0.697673
ENSG00000007129	CEACAM21	0.120895	-0.469157	0.523826	0.600848	0.732914	-6.13625
ENSG00000007168	PAFAH1B1	0.0274457	3.42084	0.255011	0.798918	0.878333	-6.65953
ENSG00000007174	DNAH9	-1.80235	-0.552473	-6.96987	2.63564e-11	7.01223e-09	15.2702
ENSG00000007202	KIAA0100	-0.215566	2.07727	-1.72159	0.0863411	0.195479	-5.1946
ENSG00000007237	AC005747.1	0.565051	3.60025	3.07303	0.00234574	0.0146892	-2.10656
ENSG00000007264	MATK	0.013132	-0.0445361	0.0519054	0.958644	0.976096	-6.37638
ENSG00000007341	ST7L	0.470739	0.902652	3.08312	0.00227036	0.0143082	-1.92676
ENSG00000007392	LUC7L	-0.226063	0.984694	-1.63816	0.102605	0.220437	-5.2439
ENSG00000007516	BAIAP3	-0.924202	0.185633	-3.6438	0.000324649	0.00319524	-0.14885
ENSG00000007520	TSR3	-0.0409663	0.49358	-0.232032	0.816697	0.889676	-6.44971
ENSG00000007541	PIGQ	-0.821694	0.367129	-3.98743	8.69869e-05	0.00120638	1.06795
ENSG00000007545	CRAMP1	-0.0613263	-0.0577264	-0.247353	0.804832	0.882169	-6.34385
ENSG00000007923	DNAJC11	-0.425266	0.171141	-1.9493	0.0523411	0.137656	-4.57901
ENSG00000007944	MYLIP	0.824557	1.14397	4.17078	4.14771e-05	0.000667157	1.75539
ENSG00000008018	PSMB1	0.213125	2.24814	1.25152	0.211875	0.366362	-5.87935
ENSG00000008083	JARID2	0.317237	1.72583	2.19551	0.029016	0.0911985	-4.25954
ENSG00000008086	CDKL5	-0.155406	0.621509	-0.6726	0.501803	0.657143	-6.26569
ENSG00000008128	CDK11A	0.29188	2.09503	1.82057	0.0698287	0.168108	-5.01243
ENSG00000008130	NADK	0.754694	5.52725	5.53136	7.77698e-08	4.0509e-06	7.58971
ENSG00000008226	DLEC1	-1.43545	-0.279589	-7.05254	1.60422e-11	4.6447e-09	15.7651
ENSG00000008256	CYTH3	-0.451607	-0.0998995	-2.11382	0.0354889	0.1058	-4.22505
ENSG00000008282	SYPL1	-0.222242	0.998149	-1.43348	0.152931	0.290739	-5.54261
ENSG00000008283	CYB561	-1.11657	0.0570597	-4.78064	2.93616e-06	7.94999e-05	4.26335
ENSG00000008294	SPAG9	0.407478	4.2645	2.63798	0.00884616	0.0389801	-3.30313
ENSG00000008323	PLEKHG6	0.175182	1.67588	0.756591	0.449984	0.611154	-6.32858
ENSG00000008382	MPND	-0.399058	0.171019	-1.92097	0.0558356	0.143249	-4.65904
ENSG00000008394	MGST1	-0.682094	1.44937	-2.91962	0.00381376	0.0211639	-2.48316
ENSG00000008438	PGLYRP1	-0.188271	1.01085	-0.642962	0.520819	0.672107	-6.33924
ENSG00000008513	ST3GAL1	0.233811	3.16942	1.61542	0.10744	0.227108	-5.4048
ENSG00000008516	MMP25	0.374528	4.635	1.47316	0.141924	0.275997	-5.62917
ENSG00000008517	IL32	0.714827	1.95894	2.53158	0.0119484	0.0476968	-3.47732
ENSG00000008710	PKD1	-0.855507	1.2597	-4.04606	6.88392e-05	0.00100437	1.20777
ENSG00000008838	MED24	-0.28687	1.72297	-1.7488	0.0815125	0.187173	-5.12614
ENSG00000008869	HEATR5B	0.0639153	0.78202	0.318251	0.750552	0.845842	-6.43376
ENSG00000008952	SEC62	-0.0608761	3.4331	-0.410991	0.681419	0.796199	-6.6108
ENSG00000008988	RPS20	-0.413899	4.59106	-2.39496	0.0173349	0.0630357	-3.89218
ENSG00000009307	CSDE1	-0.00411125	3.71715	-0.0339036	0.97298	0.983874	-6.6958
ENSG00000009335	UBE3C	-0.165755	1.01069	-1.18651	0.236512	0.396429	-5.8643
ENSG00000009413	REV3L	-0.253538	1.2545	-1.29083	0.197917	0.349095	-5.75322
ENSG00000009780	FAM76A	-0.269195	-0.147707	-1.2613	0.208337	0.362024	-5.57305
ENSG00000009790	TRAF3IP3	0.396696	2.80912	2.0185	0.0445722	0.123077	-4.67552
ENSG00000009830	POMT2	-0.471102	-0.0124118	-2.01491	0.0449499	0.1236	-4.45852
ENSG00000009844	VTA1	0.357936	0.529069	1.7807	0.0761354	0.178993	-4.88109
ENSG00000009954	BAZ1B	-0.143597	0.187551	-1.00151	0.317515	0.481532	-5.92125
ENSG00000010017	RANBP9	0.395319	1.1856	2.52964	0.012013	0.0478818	-3.43357
ENSG00000010030	ETV7	1.97004	0.677859	4.73481	3.61743e-06	9.37105e-05	4.13337
ENSG00000010219	DYRK4	-0.508743	-0.551191	-1.97866	0.0489165	0.131387	-4.41056
ENSG00000010244	ZNF207	0.23789	3.64097	1.74334	0.0824633	0.188915	-5.19871
ENSG00000010256	UQCRC1	-0.339123	2.56063	-2.38135	0.017974	0.0646226	-3.90629
ENSG00000010270	STARD3NL	0.0582579	1.418	0.471037	0.638011	0.762484	-6.48141
ENSG00000010278	CD9	-0.935219	2.6387	-3.73985	0.000226799	0.00246425	0.0446657
ENSG00000010292	NCAPD2	0.0634881	0.457849	0.36938	0.712147	0.818395	-6.40045
ENSG00000010295	IFFO1	0.0359422	0.131009	0.249291	0.803334	0.881312	-6.34627
ENSG00000010310	GIPR	-0.892445	-0.434608	-4.02811	7.39724e-05	0.00106304	1.31451
ENSG00000010322	NISCH	-0.19659	1.36433	-1.49797	0.135363	0.267448	-5.49326
ENSG00000010327	STAB1	0.389233	2.47968	1.93072	0.0546111	0.141621	-4.8266
ENSG00000010361	FUZ	-0.884924	-0.0569629	-4.015	7.79507e-05	0.00111049	1.22179
ENSG00000010404	IDS	-0.162954	3.26254	-1.52024	0.129672	0.259622	-5.55577
ENSG00000010539	ZNF200	0.45947	1.3901	2.58471	0.0102949	0.0432168	-3.32066
ENSG00000010610	CD4	-0.418023	1.89373	-2.51678	0.0124495	0.0492501	-3.55515
ENSG00000010626	LRRC23	-1.1648	0.284645	-4.76356	3.1742e-06	8.42746e-05	4.16334
ENSG00000010671	BTK	0.309351	1.86346	1.91987	0.0559751	0.143533	-4.8129
ENSG00000010803	SCMH1	-0.31975	-0.301307	-1.69538	0.0912081	0.202905	-4.93483
ENSG00000010810	FYN	0.115308	2.01406	0.585067	0.559013	0.701083	-6.45701
ENSG00000010818	HIVEP2	0.704902	1.99617	3.73921	0.000227348	0.00246749	0.100297
ENSG00000011007	ELOA	-0.301283	0.248462	-1.8782	0.0614796	0.153918	-4.71387
ENSG00000011009	LYPLA2	0.029009	1.82654	0.221754	0.82468	0.894365	-6.60529
ENSG00000011021	CLCN6	0.31256	1.11667	1.82643	0.0689386	0.166454	-4.9093
ENSG00000011114	BTBD7	0.0224587	0.748031	0.160787	0.872387	0.924322	-6.49885
ENSG00000011132	APBA3	0.264144	0.814312	1.54552	0.123443	0.250397	-5.34837
ENSG00000011198	ABHD5	-0.244692	2.34239	-1.32742	0.185541	0.333602	-5.80326
ENSG00000011243	AKAP8L	-0.126695	1.95553	-1.00783	0.31448	0.478477	-6.13891
ENSG00000011260	UTP18	0.547532	1.36164	3.38737	0.000815679	0.00639804	-1.03344
ENSG00000011275	RNF216	-0.321271	0.760377	-2.15197	0.0323261	0.0987028	-4.26177
ENSG00000011295	TTC19	-0.0927571	0.679474	-0.598272	0.550182	0.695071	-6.33514
ENSG00000011304	PTBP1	-0.212127	3.03898	-1.50213	0.134285	0.265976	-5.57789
ENSG00000011405	PIK3C2A	-0.160407	0.247032	-0.849722	0.396266	0.560466	-6.06306
ENSG00000011422	PLAUR	0.175096	7.36159	0.977047	0.32946	0.494616	-6.19317
ENSG00000011451	WIZ	-0.28902	0.0871418	-1.82679	0.0688849	0.166406	-4.79239
ENSG00000011454	RABGAP1	0.271981	1.40106	1.7754	0.0770088	0.180299	-5.02957
ENSG00000011485	PPP5C	-0.75187	0.281295	-3.68616	0.000277402	0.00282132	0.026105
ENSG00000011523	CEP68	0.468276	1.20596	2.8958	0.00410541	0.0224023	-2.48118
ENSG00000011566	MAP4K3	-0.38765	0.749399	-1.83281	0.0679816	0.164749	-4.88573
ENSG00000011600	TYROBP	-0.137864	6.82686	-1.1896	0.235296	0.394591	-5.97376
ENSG00000011638	TMEM159	-0.175043	0.222278	-1.05366	0.293024	0.455157	-5.87426
ENSG00000012048	BRCA1	-0.0737061	0.389784	-0.361996	0.717651	0.822417	-6.37823
ENSG00000012061	ERCC1	-0.438813	1.74041	-2.82499	0.00509713	0.0260619	-2.75677
ENSG00000012124	CD22	0.841867	2.45423	2.90834	0.00394945	0.0217319	-2.53402
ENSG00000012171	SEMA3B	0.082844	-0.0725027	0.429914	0.667616	0.785874	-6.25051
ENSG00000012211	PRICKLE3	-0.120443	-0.161537	-0.626198	0.531737	0.680617	-6.17778
ENSG00000012223	LTF	0.296667	1.15149	1.19859	0.231787	0.390126	-5.85809
ENSG00000012232	EXTL3	-0.162277	1.51959	-0.963414	0.33624	0.502193	-6.14724
ENSG00000012660	ELOVL5	0.250255	3.12446	1.95255	0.0519521	0.136815	-4.81253
ENSG00000012779	ALOX5	0.0505889	5.43291	0.290737	0.771486	0.859204	-6.65059
ENSG00000012822	CALCOCO1	-0.146165	1.95281	-1.14099	0.254929	0.414797	-6.00452
ENSG00000012983	MAP4K5	-0.719773	0.675146	-3.61565	0.00036013	0.00346203	-0.275949
ENSG00000013275	PSMC4	-0.140572	1.67275	-1.09512	0.274483	0.435425	-6.0269
ENSG00000013288	MAN2B2	-0.300652	0.698302	-2.25304	0.0250954	0.0819638	-4.04629
ENSG00000013306	SLC25A39	-0.312138	1.42146	-2.04413	0.0419545	0.118304	-4.56796
ENSG00000013364	MVP	-0.097593	4.19505	-1.00079	0.317862	0.481686	-6.20379
ENSG00000013374	NUB1	0.828133	2.7871	3.63321	0.000337596	0.00329365	-0.291458
ENSG00000013375	PGM3	-0.462752	-0.00357656	-2.10952	0.0358618	0.106502	-4.27513
ENSG00000013441	CLK1	0.42458	3.47603	3.05496	0.00248647	0.0153845	-2.15992
ENSG00000013561	RNF14	-0.0827759	0.600193	-0.537835	0.591154	0.725706	-6.3426
ENSG00000013563	DNASE1L1	-0.251527	1.31725	-1.50475	0.13361	0.265279	-5.47208
ENSG00000013573	DDX11	-0.901935	0.827867	-3.03867	0.00261988	0.0158708	-2.08862
ENSG00000013583	HEBP1	-0.378033	0.249758	-2.07252	0.0392083	0.112988	-4.35255
ENSG00000013588	GPRC5A	-0.569645	0.912796	-2.03298	0.0430765	0.120604	-4.5564
ENSG00000013725	CD6	-0.230101	1.07504	-1.18257	0.238068	0.398062	-5.87816
ENSG00000013810	TACC3	0.0380697	1.95548	0.255601	0.798463	0.878122	-6.59884
ENSG00000014164	ZC3H3	0.403938	1.82813	2.39468	0.0173477	0.0630384	-3.81766
ENSG00000014216	CAPN1	-0.309947	2.85694	-2.75622	0.00626387	0.0303566	-2.98474
ENSG00000014257	ACPP	0.134193	0.434647	0.595832	0.551809	0.696232	-6.23487
ENSG00000014824	SLC30A9	-0.151808	0.426098	-0.979237	0.328378	0.493445	-5.99159
ENSG00000014919	COX15	-0.125879	0.401892	-0.766281	0.444208	0.606237	-6.16746
ENSG00000015133	CCDC88C	-0.536909	1.21046	-2.86217	0.00455216	0.0241832	-2.60483
ENSG00000015153	YAF2	0.325147	0.914839	1.63945	0.102337	0.219909	-5.19342
ENSG00000015171	ZMYND11	-0.472389	-0.0806734	-2.66848	0.00810137	0.0365155	-2.95649
ENSG00000015285	WAS	0.381687	4.01678	2.72148	0.0069408	0.0326446	-3.08701
ENSG00000015475	BID	0.323821	4.39623	1.83876	0.0670984	0.163212	-5.03686
ENSG00000015479	MATR3	-0.139113	2.28175	-1.02874	0.304565	0.467875	-6.13695
ENSG00000015568	RGPD5	-0.505199	2.10547	-2.07356	0.0391113	0.112832	-4.56113
ENSG00000015676	NUDCD3	-0.3131	0.627264	-1.86679	0.0630629	0.156449	-4.81771
ENSG00000016864	GLT8D1	-0.205669	0.0338469	-1.02304	0.307248	0.470966	-5.86101
ENSG00000017260	ATP2C1	-0.053373	2.054	-0.347218	0.72871	0.830066	-6.58312
ENSG00000017483	SLC38A5	0.55182	-0.572721	1.78929	0.0747385	0.176687	-4.61482
ENSG00000017797	RALBP1	-0.201275	1.57014	-1.80094	0.0728779	0.173623	-5.02538
ENSG00000018189	RUFY3	-0.220156	1.44767	-1.31766	0.188783	0.337153	-5.75511
ENSG00000018280	SLC11A1	-0.4391	6.2931	-2.50282	0.0129389	0.0506442	-3.61887
ENSG00000018510	AGPS	-0.198076	0.72661	-1.25961	0.208945	0.362761	-5.749
ENSG00000019144	PHLDB1	-0.0612787	0.335183	-0.267483	0.78931	0.871418	-6.42491
ENSG00000019169	MARCO	-1.41576	2.87585	-5.22958	3.51068e-07	1.38792e-05	6.1498
ENSG00000019582	CD74	-0.584555	7.01002	-2.35444	0.0192992	0.0679137	-3.95589
ENSG00000020577	SAMD4A	-0.569621	0.281092	-2.18585	0.0297239	0.0930667	-4.11709
ENSG00000020633	RUNX3	0.573	1.66339	2.78011	0.00583366	0.0289594	-2.82798
ENSG00000020922	MRE11	-0.185826	0.0915114	-1.17529	0.24096	0.400813	-5.71561
ENSG00000021355	SERPINB1	0.41737	5.7586	3.13538	0.00191461	0.0125149	-1.92234
ENSG00000021574	SPAST	0.151122	1.33229	1.28082	0.201404	0.353468	-5.76869
ENSG00000021762	OSBPL5	-0.491136	0.327791	-2.19162	0.0292998	0.0918559	-4.11589
ENSG00000022277	RTF2	0.269122	3.43597	2.07793	0.038703	0.112132	-4.57486
ENSG00000022556	NLRP2	-0.247684	0.197193	-1.01868	0.309308	0.473093	-5.902
ENSG00000022567	SLC45A4	0.37168	2.61201	2.06628	0.0397988	0.114288	-4.57381
ENSG00000022840	RNF10	0.179948	4.4223	1.414	0.158566	0.29817	-5.71336
ENSG00000023041	ZDHHC6	0.149987	0.932739	0.938342	0.348945	0.514377	-6.0819
ENSG00000023171	GRAMD1B	0.718019	0.859405	3.15905	0.00177109	0.0118441	-1.65347
ENSG00000023191	RNH1	-0.595814	2.93276	-3.80489	0.00017715	0.0020711	0.271305
ENSG00000023228	NDUFS1	-0.377988	0.97726	-2.45387	0.0147932	0.0563682	-3.62625
ENSG00000023287	RB1CC1	0.312281	1.63036	2.33585	0.0202645	0.0700187	-3.93943
ENSG00000023318	ERP44	0.343716	0.828794	2.11125	0.0357116	0.106226	-4.30919
ENSG00000023330	ALAS1	-0.228346	1.97037	-1.37794	0.169414	0.312892	-5.71683
ENSG00000023445	BIRC3	1.07327	1.96334	5.80925	1.83847e-08	1.31144e-06	9.01521
ENSG00000023608	SNAPC1	0.490101	0.248465	2.31942	0.0211523	0.0723249	-3.80278
ENSG00000023697	DERA	-0.144269	0.10162	-0.768018	0.443177	0.605295	-6.088
ENSG00000023734	STRAP	-0.103654	1.44243	-0.752549	0.452406	0.613428	-6.3179
ENSG00000023892	DEF6	0.381285	1.71817	2.30764	0.0218095	0.0738538	-4.00393
ENSG00000023902	PLEKHO1	0.554898	2.36003	3.05261	0.00250531	0.0154398	-2.1238
ENSG00000023909	GCLM	0.623876	1.69873	3.02546	0.00273295	0.0163744	-2.16911
ENSG00000024048	UBR2	0.218128	1.4552	1.72032	0.086571	0.195729	-5.13375
ENSG00000024862	CCDC28A	0.319539	0.405925	1.69316	0.0916298	0.203315	-5.01408
ENSG00000025039	RRAGD	0.385794	1.47908	2.38714	0.0176995	0.0638688	-3.81019
ENSG00000025293	PHF20	0.120607	2.43615	0.814253	0.41625	0.579332	-6.34016
ENSG00000025434	NR1H3	-0.0453184	2.18263	-0.199737	0.841843	0.905363	-6.63291
ENSG00000025708	TYMP	0.311549	6.3122	2.28293	0.0232469	0.0775467	-4.13299
ENSG00000025770	NCAPH2	-0.133646	0.810235	-0.883575	0.377747	0.541982	-6.14559
ENSG00000025796	SEC63	-0.126774	1.79828	-0.788722	0.430998	0.593805	-6.32532
ENSG00000025800	KPNA6	-0.0418931	0.627902	-0.279709	0.779924	0.86565	-6.44354
ENSG00000026025	VIM	-0.258851	7.36088	-1.66869	0.0963891	0.211207	-5.29348
ENSG00000026103	FAS	1.18554	2.32465	5.45315	1.15625e-07	5.58988e-06	7.25861
ENSG00000026297	RNASET2	0.205725	3.80689	1.34407	0.180105	0.327101	-5.80602
ENSG00000026508	CD44	0.162579	7.44594	1.11713	0.264978	0.426216	-6.04737
ENSG00000026652	AGPAT4	0.124291	0.85378	0.681932	0.495893	0.65218	-6.27253
ENSG00000026751	SLAMF7	2.09145	4.05601	7.19293	6.8457e-12	2.66312e-09	16.5929
ENSG00000026950	BTN3A1	1.4614	1.77956	5.77798	2.16793e-08	1.50289e-06	8.87995
ENSG00000027075	PRKCH	0.0939662	3.85282	0.439982	0.660318	0.779958	-6.60116
ENSG00000027697	IFNGR1	0.260772	4.09816	1.53788	0.125301	0.253278	-5.53335
ENSG00000027847	B4GALT7	-0.949742	-0.482982	-4.27776	2.66015e-05	0.000465953	2.24603
ENSG00000027869	SH2D2A	0.636839	-0.40849	2.26077	0.0246059	0.0807133	-3.75163
ENSG00000028116	VRK2	-0.0298464	1.04706	-0.197581	0.843528	0.906219	-6.51092
ENSG00000028137	TNFRSF1B	0.504288	5.67743	2.7359	0.00665218	0.0316043	-3.04347
ENSG00000028203	VEZT	-0.0609209	1.08339	-0.406471	0.684733	0.798449	-6.47073
ENSG00000028277	POU2F2	0.134138	1.72611	0.59605	0.551663	0.696202	-6.44683
ENSG00000028310	BRD9	-0.319308	1.29045	-2.15956	0.0317266	0.0974468	-4.31627
ENSG00000028528	SNX1	0.21967	3.45058	1.31577	0.189416	0.338159	-5.83752
ENSG00000028839	TBPL1	0.862092	1.49849	3.02052	0.00277639	0.0165641	-2.09379
ENSG00000029153	ARNTL2	0.697963	0.427316	3.19738	0.00155956	0.0107284	-1.49862
ENSG00000029363	BCLAF1	0.154499	2.76055	1.30861	0.19183	0.341293	-5.8302
ENSG00000029364	SLC39A9	-0.134386	0.680097	-1.11174	0.267285	0.428736	-5.88414
ENSG00000029725	RABEP1	0.0189737	1.37079	0.13249	0.8947	0.938658	-6.57558
ENSG00000029993	HMGB3	0.0102556	1.37801	0.0275252	0.978062	0.986783	-6.60865
ENSG00000030066	NUP160	0.0742189	1.17117	0.429813	0.66769	0.785874	-6.46502
ENSG00000030110	BAK1	0.562324	0.298363	2.97538	0.0032034	0.0184411	-2.13615
ENSG00000030582	GRN	-0.310539	5.84922	-1.74418	0.0823175	0.188625	-5.19085
ENSG00000031003	FAM13B	0.320005	1.67369	2.60131	0.00982223	0.0420209	-3.31503
ENSG00000031081	ARHGAP31	0.628297	0.882362	3.16464	0.00173867	0.011667	-1.6688
ENSG00000031698	SARS1	-0.18749	1.13587	-1.42158	0.156354	0.29514	-5.57765
ENSG00000031823	RANBP3	-0.0300699	2.01852	-0.198629	0.842709	0.905792	-6.62827
ENSG00000032219	ARID4A	0.345896	1.62401	2.21238	0.0278149	0.0883426	-4.20086
ENSG00000032389	EIPR1	0.0823096	0.273468	0.444318	0.657185	0.777195	-6.31332
ENSG00000032444	PNPLA6	-0.51086	4.16331	-2.95205	0.00344694	0.0195911	-2.46115
ENSG00000032742	IFT88	-0.332608	-0.398561	-1.78795	0.0749562	0.177074	-4.77712
ENSG00000033030	ZCCHC8	-0.0543998	0.042678	-0.378384	0.705456	0.813841	-6.29899
ENSG00000033050	ABCF2	-0.410665	-0.396518	-1.71449	0.0876379	0.197506	-4.89627
ENSG00000033100	CHPF2	0.316598	0.936824	2.35604	0.0192179	0.0676911	-3.83152
ENSG00000033170	FUT8	-0.28209	0.131972	-1.05054	0.29445	0.456682	-5.88949
ENSG00000033178	UBA6	0.346334	1.85875	1.92272	0.055614	0.142949	-4.80566
ENSG00000033327	GAB2	0.238011	3.33886	1.59673	0.111548	0.233385	-5.43762
ENSG00000033627	ATP6V0A1	-0.0806444	2.93495	-0.52265	0.601666	0.733382	-6.54909
ENSG00000033800	PIAS1	0.418246	2.67677	3.02893	0.00270282	0.0162532	-2.2163
ENSG00000033867	SLC4A7	-0.30527	-0.0199817	-1.68382	0.0934247	0.206239	-5.01196
ENSG00000034152	MAP2K3	0.211711	4.79124	1.32104	0.187655	0.335625	-5.83608
ENSG00000034239	EFCAB1	-1.53842	-0.593679	-5.59554	5.59938e-08	3.15792e-06	8.016
ENSG00000034510	TMSB10	0.0535781	6.80211	0.279537	0.780056	0.86565	-6.63568
ENSG00000034677	RNF19A	0.118208	2.59508	0.832179	0.406076	0.57041	-6.32853
ENSG00000034713	GABARAPL2	0.560096	3.75723	3.4082	0.00075837	0.00607931	-1.07848
ENSG00000035115	SH3YL1	-0.795998	0.11091	-3.85849	0.000144154	0.0017716	0.641207
ENSG00000035403	VCL	-0.192529	0.859605	-1.13703	0.256579	0.416655	-5.88671
ENSG00000035664	DAPK2	-0.127078	0.863709	-0.641815	0.521562	0.672556	-6.33541
ENSG00000035681	NSMAF	0.846352	3.73118	4.71147	4.02047e-06	0.000101725	3.82997
ENSG00000035687	ADSS2	-0.108376	0.931153	-0.772964	0.44025	0.602506	-6.24269
ENSG00000035862	TIMP2	-0.28517	2.9487	-1.85327	0.0649837	0.159725	-4.99997
ENSG00000035928	RFC1	0.00777428	1.39464	0.04279	0.965902	0.980039	-6.5798
ENSG00000036054	TBC1D23	0.438222	0.967962	2.70659	0.00725073	0.0336521	-2.96126
ENSG00000036257	CUL3	0.0912923	2.72612	0.663097	0.50786	0.662432	-6.45904
ENSG00000036549	AC118549.1	-0.457038	-0.211091	-1.98234	0.0484999	0.13068	-4.45064
ENSG00000037241	RPL26L1	-0.598055	0.0875097	-2.47463	0.0139799	0.0539467	-3.46193
ENSG00000037474	NSUN2	-0.207586	0.833742	-1.53126	0.126927	0.255725	-5.38122
ENSG00000037637	FBXO42	-0.346514	0.0283784	-2.66819	0.00810836	0.0365303	-2.97146
ENSG00000037749	MFAP3	0.0134953	0.977643	0.0904282	0.928017	0.958457	-6.52668
ENSG00000037897	METTL1	-0.260899	-0.639117	-1.1491	0.251578	0.411727	-5.63512
ENSG00000038210	PI4K2B	0.719364	0.382898	2.82271	0.00513231	0.0262182	-2.51561
ENSG00000038219	BOD1L1	0.337029	2.44016	2.22848	0.0267094	0.0857355	-4.22993
ENSG00000038274	MAT2B	0.425549	1.93147	2.85267	0.00468611	0.0246364	-2.66158
ENSG00000038358	EDC4	0.190454	1.28885	1.24452	0.214437	0.36917	-5.81183
ENSG00000038382	TRIO	-0.155531	2.62803	-1.00121	0.317664	0.481683	-6.18555
ENSG00000038427	VCAN	0.134418	4.30426	0.492966	0.622455	0.749902	-6.57726
ENSG00000038532	CLEC16A	-0.127365	1.11962	-0.914368	0.361376	0.526707	-6.14152
ENSG00000038945	MSR1	-1.68029	2.81061	-6.05336	4.968e-09	4.61368e-07	10.2344
ENSG00000039068	CDH1	-1.15079	0.627402	-4.38053	1.72197e-05	0.000323493	2.55638
ENSG00000039123	MTREX	-0.297462	0.806997	-1.76885	0.0780977	0.181834	-4.98871
ENSG00000039319	ZFYVE16	0.590865	3.25424	3.20564	0.00151717	0.0105102	-1.70606
ENSG00000039523	RIPOR1	0.0716809	2.5057	0.455765	0.648942	0.770923	-6.56692
ENSG00000039560	RAI14	-1.09815	-0.556066	-4.80837	2.58603e-06	7.17095e-05	4.42831
ENSG00000039650	PNKP	-0.248871	2.50676	-1.25016	0.212372	0.366898	-5.90474
ENSG00000040341	STAU2	0.0282752	1.80515	0.181881	0.855818	0.913938	-6.60954
ENSG00000040487	SLC66A1	0.0362752	-0.0689369	0.231163	0.817371	0.890165	-6.33648
ENSG00000040531	CTNS	0.399512	1.29816	2.34489	0.0197898	0.068935	-3.876
ENSG00000040633	PHF23	0.0535047	2.00722	0.352321	0.724885	0.827363	-6.57659
ENSG00000040933	INPP4A	0.115223	1.89734	0.733644	0.463831	0.624077	-6.36316
ENSG00000041357	PSMA4	0.436344	3.04148	2.1263	0.0344262	0.103573	-4.45401
ENSG00000041802	LSG1	-0.138441	0.177499	-0.793849	0.428012	0.591264	-6.1062
ENSG00000042062	RIPOR3	0.902065	0.416434	4.43191	1.38128e-05	0.000271404	2.84668
ENSG00000042088	TDP1	-0.00216817	-0.0676504	-0.0112707	0.991016	0.995197	-6.36563
ENSG00000042429	MED17	-0.00610233	1.22448	-0.0599624	0.952232	0.972888	-6.55749
ENSG00000042445	RETSAT	-0.124531	0.586851	-0.914762	0.361169	0.526621	-6.08462
ENSG00000042493	CAPG	-0.334782	4.27151	-2.14899	0.0325644	0.0992855	-4.43507
ENSG00000042753	AP2S1	-0.471872	2.50498	-2.60066	0.00984027	0.0420745	-3.37548
ENSG00000042832	TG	0.169654	1.04128	0.662502	0.50824	0.662752	-6.33924
ENSG00000042980	ADAM28	0.382927	0.558418	1.67257	0.0956223	0.209976	-5.05507
ENSG00000043093	DCUN1D1	0.0130014	1.05504	0.0792635	0.936884	0.964515	-6.54
ENSG00000043143	JADE2	-0.0574865	0.553562	-0.299172	0.765049	0.855387	-6.42091
ENSG00000043462	LCP2	0.612712	6.91294	4.46709	1.18639e-05	0.000242802	2.81765
ENSG00000044115	CTNNA1	-0.404306	4.00433	-3.4002	0.000779916	0.00620153	-1.10741
ENSG00000044446	PHKA2	-0.119189	1.02849	-0.626167	0.531758	0.680617	-6.35632
ENSG00000044574	HSPA5	-0.192616	3.87048	-1.10058	0.272104	0.433429	-6.1002
ENSG00000046651	OFD1	-0.198659	0.101828	-1.09734	0.273513	0.434553	-5.82515
ENSG00000047056	WDR37	0.184847	1.31457	1.17261	0.242033	0.401783	-5.89796
ENSG00000047188	YTHDC2	0.366929	0.538852	2.3611	0.0189635	0.0672701	-3.74051
ENSG00000047249	ATP6V1H	0.352502	2.49568	2.44665	0.0150859	0.0570516	-3.73891
ENSG00000047315	POLR2B	-0.0150854	1.21258	-0.111822	0.911051	0.94772	-6.55288
ENSG00000047346	FAM214A	0.209591	0.832099	1.28413	0.200245	0.352191	-5.70959
ENSG00000047365	ARAP2	0.949917	2.10209	4.70781	4.08756e-06	0.00010291	3.86631
ENSG00000047410	TPR	0.153785	2.11879	1.09523	0.274437	0.435425	-6.05296
ENSG00000047457	CP	-0.513065	0.584048	-1.78403	0.0755913	0.17819	-4.94846
ENSG00000047578	KIAA0556	-0.321721	1.47477	-2.09804	0.0368728	0.108545	-4.45885
ENSG00000047579	DTNBP1	0.637475	1.54885	3.99405	8.4731e-05	0.00118817	1.05385
ENSG00000047621	C12orf4	-0.108704	0.560782	-0.54507	0.586176	0.72174	-6.33419
ENSG00000047644	WWC3	0.0654117	0.641042	0.470396	0.638469	0.762754	-6.37185
ENSG00000047849	MAP4	-0.299209	1.61217	-2.45095	0.0149112	0.0566739	-3.68554
ENSG00000048052	HDAC9	-0.560923	-0.0899802	-2.41437	0.0164579	0.0607922	-3.57922
ENSG00000048342	CC2D2A	0.341974	3.29208	1.74528	0.0821242	0.188314	-5.18985
ENSG00000048392	RRM2B	-0.302045	1.19544	-1.62373	0.105652	0.224781	-5.28645
ENSG00000048405	ZNF800	-0.0302171	0.803834	-0.223565	0.823272	0.893367	-6.49501
ENSG00000048471	SNX29	-0.147813	1.02369	-0.925172	0.355739	0.521582	-6.13216
ENSG00000048649	RSF1	0.16128	2.14972	1.28275	0.20073	0.352728	-5.83055
ENSG00000048707	VPS13D	0.47017	1.95904	2.63151	0.00901157	0.0395144	-3.25965
ENSG00000048740	CELF2	0.269108	2.70507	2.04067	0.0423002	0.119116	-4.62886
ENSG00000048828	FAM120A	-0.113765	2.48202	-0.919979	0.358442	0.523922	-6.25166
ENSG00000048991	R3HDM1	-0.166757	1.41659	-0.845304	0.398723	0.563132	-6.24729
ENSG00000049089	COL9A2	-0.458233	0.0568748	-1.75137	0.0810677	0.186325	-4.92414
ENSG00000049239	H6PD	-0.13255	0.516116	-1.12067	0.263467	0.424451	-5.86302
ENSG00000049245	VAMP3	0.202032	3.364	1.02679	0.30548	0.468988	-6.16824
ENSG00000049540	ELN	-0.684308	0.707078	-2.56897	0.0107621	0.044439	-3.3344
ENSG00000049541	RFC2	-0.182878	0.388692	-1.03254	0.302785	0.466013	-5.93374
ENSG00000049618	ARID1B	-0.247873	1.95462	-1.94712	0.052603	0.138078	-4.78487
ENSG00000049656	CLPTM1L	-0.223352	2.95889	-1.55092	0.122144	0.248787	-5.50285
ENSG00000049759	NEDD4L	-0.809319	1.14803	-3.47199	0.000605394	0.00510668	-0.790337
ENSG00000049860	HEXB	-0.379986	3.29768	-2.37487	0.0182856	0.0654557	-3.93601
ENSG00000050130	JKAMP	-0.118968	0.78033	-0.683719	0.494765	0.651481	-6.2711
ENSG00000050327	ARHGEF5	-1.21056	-0.564999	-6.30664	1.22813e-09	1.59076e-07	11.6248
ENSG00000050344	NFE2L3	0.636483	1.77102	3.00827	0.00288673	0.0170492	-2.21402
ENSG00000050405	LIMA1	-0.724503	0.0541496	-3.65158	0.000315444	0.00311457	-0.0716253
ENSG00000050426	LETMD1	-0.364888	0.565313	-2.08139	0.0383823	0.111654	-4.38436
ENSG00000050438	SLC4A8	-0.931744	-0.106305	-4.33664	2.0755e-05	0.000379762	2.4525
ENSG00000050730	TNIP3	0.955874	3.06683	2.56191	0.0109777	0.0450269	-3.46989
ENSG00000050748	MAPK9	-0.184288	0.411398	-0.980849	0.327585	0.492628	-6.01349
ENSG00000050820	BCAR1	-2.11149	-0.215721	-8.38354	3.34707e-15	4.44865e-12	23.8932
ENSG00000051009	FAM160A2	0.0646972	1.59155	0.370219	0.711522	0.818109	-6.54363
ENSG00000051108	HERPUD1	0.450844	3.16809	2.70795	0.00722196	0.0335507	-3.11108
ENSG00000051128	HOMER3	0.0687795	1.31327	0.389572	0.697174	0.808473	-6.5095
ENSG00000051382	PIK3CB	0.0821822	1.47726	0.544277	0.58672	0.72223	-6.45204
ENSG00000051523	CYBA	0.0428769	6.43494	0.296511	0.767078	0.85701	-6.63353
ENSG00000051596	THOC3	-0.326276	0.240806	-1.24154	0.215533	0.37041	-5.68819
ENSG00000051620	HEBP2	-0.00200187	1.3348	-0.011226	0.991052	0.995197	-6.58822
ENSG00000051825	MPHOSPH9	-0.65295	0.0601139	-2.79784	0.00553181	0.0277408	-2.62699
ENSG00000052126	PLEKHA5	-0.830051	-0.237944	-3.73186	0.000233735	0.0025229	0.240923
ENSG00000052344	PRSS8	-0.341191	-0.159607	-1.48549	0.138632	0.271744	-5.30747
ENSG00000052723	SIKE1	0.525353	0.230486	2.26571	0.0242969	0.0799862	-3.88419
ENSG00000052749	RRP12	-0.242456	1.95747	-1.37604	0.170001	0.313683	-5.71457
ENSG00000052795	FNIP2	0.750224	2.96141	3.94732	0.000101931	0.00136148	0.801158
ENSG00000052802	MSMO1	-0.907042	-0.022496	-4.84949	2.13999e-06	6.15966e-05	4.58433
ENSG00000052841	TTC17	0.19114	1.3608	1.39134	0.16532	0.307246	-5.62481
ENSG00000053254	FOXN3	-0.158381	2.85011	-1.05348	0.293105	0.455171	-6.13487
ENSG00000053371	AKR7A2	-0.913799	-0.400221	-4.495	1.05082e-05	0.000221504	3.11336
ENSG00000053501	USE1	-0.278398	0.642126	-1.66848	0.0964316	0.211231	-5.15419
ENSG00000053524	MCF2L2	0.152971	0.594754	0.664546	0.506933	0.661749	-6.25945
ENSG00000053770	AP5M1	0.0357737	0.620888	0.233587	0.815491	0.889495	-6.44814
ENSG00000053900	ANAPC4	-0.359799	0.366954	-2.11973	0.0349819	0.104797	-4.26921
ENSG00000053918	KCNQ1	-0.265489	0.681185	-1.57023	0.117584	0.242357	-5.30195
ENSG00000054116	TRAPPC3	0.0931047	1.39384	0.597811	0.55049	0.69537	-6.41453
ENSG00000054118	THRAP3	0.0984357	2.44875	0.830464	0.407043	0.571258	-6.32299
ENSG00000054148	PHPT1	-0.293082	0.418339	-1.1298	0.259609	0.420052	-5.88144
ENSG00000054267	ARID4B	0.76191	3.24864	4.29519	2.47242e-05	0.000440118	2.12295
ENSG00000054277	OPN3	-0.99654	0.233247	-5.41389	1.40873e-07	6.60358e-06	7.11343
ENSG00000054282	SDCCAG8	-0.173837	1.69869	-1.12981	0.259605	0.420052	-5.99113
ENSG00000054523	KIF1B	0.35793	2.40113	2.67935	0.00785009	0.0356934	-3.15689
ENSG00000054611	TBC1D22A	0.0795353	1.27825	0.68325	0.495061	0.651783	-6.35263
ENSG00000054654	SYNE2	-0.470731	2.35355	-2.71886	0.00699438	0.0327714	-3.06892
ENSG00000054965	FAM168A	0.434885	1.59241	2.76918	0.00602701	0.029591	-2.87006
ENSG00000054967	RELT	-0.0481253	2.9961	-0.278796	0.780624	0.866143	-6.64999
ENSG00000054983	GALC	0.510339	3.008	3.5197	0.000510406	0.00445824	-0.701026
ENSG00000055044	NOP58	0.0103569	0.984837	0.0571935	0.954435	0.974196	-6.54246
ENSG00000055070	SZRD1	0.151743	2.52378	1.17707	0.240251	0.400175	-5.98391
ENSG00000055130	CUL1	0.554302	1.31661	3.02566	0.00273121	0.016374	-2.10866
ENSG00000055147	FAM114A2	0.31967	0.502031	1.66634	0.0968569	0.211912	-5.09032
ENSG00000055163	CYFIP2	-0.198187	3.22005	-1.11519	0.265806	0.427059	-6.07866
ENSG00000055208	TAB2	0.567772	3.03391	4.10988	5.31985e-05	0.00081954	1.40242
ENSG00000055211	GINM1	-0.30898	0.00296791	-1.75406	0.0806048	0.185608	-4.88724
ENSG00000055332	EIF2AK2	1.45317	2.95935	5.97705	7.50936e-09	6.60647e-07	9.86232
ENSG00000055483	AC022966.1	-0.00902424	2.11309	-0.0582375	0.953604	0.973692	-6.65413
ENSG00000055609	KMT2C	0.18022	2.76668	1.52629	0.12816	0.257628	-5.53221
ENSG00000055917	PUM2	0.41398	2.19312	3.31126	0.00106124	0.00792138	-1.3424
ENSG00000055950	MRPL43	-0.364348	0.105063	-1.8938	0.059368	0.150077	-4.66944
ENSG00000055955	ITIH4	0.219846	0.396	0.898238	0.369895	0.534534	-6.00786
ENSG00000056097	ZFR	0.00127876	1.48868	0.0115628	0.990783	0.995197	-6.60051
ENSG00000056558	TRAF1	1.31152	2.19554	4.61846	6.10114e-06	0.000140079	3.48725
ENSG00000056586	RC3H2	-0.322416	1.57032	-1.97668	0.0491404	0.131802	-4.70428
ENSG00000056972	TRAF3IP2	-0.209136	1.08268	-1.19819	0.231941	0.390295	-5.8607
ENSG00000057019	DCBLD2	-0.546212	-0.399694	-2.09161	0.0374493	0.109718	-4.22264
ENSG00000057149	SERPINB3	-0.808988	0.711896	-2.08085	0.0384325	0.111733	-4.41001
ENSG00000057252	SOAT1	-0.281348	1.91439	-1.47789	0.140655	0.274519	-5.56513
ENSG00000057608	GDI2	0.0595563	3.24601	0.494283	0.621526	0.749491	-6.56757
ENSG00000057657	PRDM1	0.944724	2.15032	4.67396	4.76062e-06	0.000115144	3.72756
ENSG00000057663	ATG5	0.0954126	0.431491	0.55417	0.579941	0.717294	-6.29254
ENSG00000057704	TMCC3	-0.0104299	1.88496	-0.0473211	0.962294	0.978294	-6.63383
ENSG00000057757	PITHD1	-0.326256	0.153184	-2.33356	0.0203862	0.0703406	-3.78895
ENSG00000058063	ATP11B	0.615242	3.76478	3.74474	0.000222651	0.00242453	0.0552576
ENSG00000058091	CDK14	0.201977	1.26619	1.08364	0.279536	0.441057	-5.99691
ENSG00000058262	SEC61A1	0.040917	2.27093	0.302187	0.762753	0.854408	-6.60864
ENSG00000058272	PPP1R12A	0.292743	3.82988	2.11432	0.0354461	0.105705	-4.50441
ENSG00000058453	CROCC	-0.757669	1.45073	-3.68306	0.000280627	0.00284207	-0.104867
ENSG00000058600	POLR3E	-0.354556	0.500746	-1.97047	0.0498514	0.132919	-4.59359
ENSG00000058668	ATP2B4	-0.100943	1.68428	-0.62141	0.534877	0.683188	-6.42313
ENSG00000058673	ZC3H11A	0.514415	2.39919	3.71435	0.000249642	0.00264814	-0.0174646
ENSG00000058799	YIPF1	0.434072	1.2704	2.84706	0.00476677	0.0248668	-2.60793
ENSG00000059122	FLYWCH1	-0.506487	0.409397	-2.57421	0.0106046	0.0440284	-3.27753
ENSG00000059145	UNKL	0.212987	1.37109	1.11665	0.265183	0.426406	-5.97083
ENSG00000059377	TBXAS1	0.175152	3.90569	1.01652	0.310332	0.474183	-6.18728
ENSG00000059378	PARP12	1.28458	3.37125	4.78193	2.919e-06	7.94999e-05	4.15231
ENSG00000059728	MXD1	0.59554	6.29014	3.68869	0.000274795	0.00280901	-0.132432
ENSG00000059758	CDK17	0.539796	2.20822	3.1275	0.00196471	0.0127641	-1.89608
ENSG00000059804	SLC2A3	0.169013	6.16021	0.936374	0.349955	0.51548	-6.2498
ENSG00000059915	PSD	0.586502	0.520068	2.54456	0.011524	0.046665	-3.31124
ENSG00000060069	CTDP1	0.264012	2.13507	1.66153	0.09782	0.213109	-5.28849
ENSG00000060138	YBX3	-0.318845	3.66914	-2.17813	0.030301	0.0942442	-4.3725
ENSG00000060237	WNK1	-0.265121	3.71137	-2.41483	0.0164375	0.0607397	-3.84618
ENSG00000060339	CCAR1	0.0150669	1.58218	0.0993925	0.920904	0.953848	-6.60344
ENSG00000060491	OGFR	0.498921	3.02372	3.08643	0.00224616	0.0141738	-2.05518
ENSG00000060558	GNA15	0.164832	2.48141	1.14406	0.253655	0.413638	-6.02149
ENSG00000060642	PIGV	0.39304	-0.229218	1.83797	0.0672153	0.163375	-4.65639
ENSG00000060656	PTPRU	-0.918986	-0.516333	-3.42208	0.000722293	0.00587624	-0.752619
ENSG00000060688	SNRNP40	-0.634441	0.0969027	-3.30498	0.00108433	0.0080681	-1.18992
ENSG00000060762	MPC1	-0.242422	0.264281	-1.19094	0.234772	0.393981	-5.74842
ENSG00000060971	ACAA1	-0.00660852	2.94605	-0.0462449	0.963151	0.978772	-6.68476
ENSG00000060982	BCAT1	-0.00469811	1.93188	-0.0282186	0.97751	0.986529	-6.64048
ENSG00000061273	HDAC7	-0.203445	2.45959	-1.58845	0.113408	0.236222	-5.43111
ENSG00000061936	SFSWAP	-0.0733959	1.51131	-0.535887	0.592498	0.726888	-6.46122
ENSG00000061938	TNK2	0.366045	2.34632	1.9947	0.0471263	0.128011	-4.69925
ENSG00000061987	MON2	0.172395	1.45626	1.27374	0.2039	0.35639	-5.7931
ENSG00000062038	CDH3	-0.852622	-0.655467	-3.67466	0.00028954	0.00291733	0.107717
ENSG00000062194	GPBP1	0.664824	3.03066	4.20179	3.64995e-05	0.000603868	1.76088
ENSG00000062282	DGAT2	0.104818	3.57428	0.468146	0.640075	0.763838	-6.58676
ENSG00000062485	CS	-0.421328	2.20011	-4.06106	6.4812e-05	0.000962307	1.22831
ENSG00000062582	MRPS24	-0.104832	0.991253	-0.517437	0.605294	0.736255	-6.42507
ENSG00000062598	ELMO2	0.292798	2.28726	1.7032	0.0897329	0.200757	-5.2154
ENSG00000062650	WAPL	0.127808	1.33342	0.916185	0.360424	0.525966	-6.16174
ENSG00000062716	VMP1	0.246772	5.36151	1.70781	0.088872	0.199424	-5.25933
ENSG00000062725	APPBP2	0.0371787	0.633185	0.251055	0.801971	0.880505	-6.4613
ENSG00000062822	POLD1	-0.361741	-0.0373822	-1.91785	0.0562323	0.144004	-4.61258
ENSG00000063015	SEZ6	0.663619	-0.329197	2.53345	0.0118863	0.0475451	-3.1981
ENSG00000063046	EIF4B	-0.365554	2.93575	-2.97868	0.00317026	0.0182717	-2.37719
ENSG00000063169	BICRA	-0.137123	0.152113	-0.80445	0.421877	0.58517	-6.08678
ENSG00000063177	RPL18	-0.228114	4.2829	-1.33042	0.184553	0.332067	-5.82608
ENSG00000063241	ISOC2	-0.542234	0.239832	-2.4174	0.0163245	0.0603904	-3.63737
ENSG00000063244	U2AF2	-0.206784	2.84829	-1.33795	0.182089	0.329139	-5.8033
ENSG00000063245	EPN1	-0.00946661	2.14083	-0.0673562	0.94635	0.969293	-6.65278
ENSG00000063322	MED29	0.056988	1.46283	0.425049	0.671155	0.788689	-6.50242
ENSG00000063601	MTMR1	0.0896158	0.64863	0.53771	0.59124	0.725706	-6.33945
ENSG00000063854	HAGH	-0.637898	0.87668	-3.91417	0.000116091	0.00150208	0.757987
ENSG00000063978	RNF4	-0.0988593	1.79669	-0.691257	0.490024	0.646882	-6.39244
ENSG00000064012	CASP8	0.31037	2.52275	1.99989	0.0465589	0.127136	-4.69919
ENSG00000064115	TM7SF3	-0.049597	1.35509	-0.241433	0.809411	0.885709	-6.56164
ENSG00000064225	ST3GAL6	0.391373	2.2448	1.99914	0.0466401	0.127255	-4.68883
ENSG00000064270	ATP2C2	-1.05266	0.582341	-3.97893	8.99701e-05	0.00123696	1.01536
ENSG00000064313	TAF2	0.0684667	1.01441	0.446437	0.655655	0.776127	-6.45121
ENSG00000064393	HIPK2	-0.388931	1.50451	-2.54052	0.0116545	0.0469529	-3.47018
ENSG00000064419	TNPO3	0.299554	0.929382	2.18161	0.0300397	0.0936981	-4.19506
ENSG00000064490	RFXANK	-0.0471499	1.24485	-0.26923	0.787968	0.871016	-6.53442
ENSG00000064547	LPAR2	0.158208	3.09581	0.753754	0.451683	0.612954	-6.40555
ENSG00000064601	CTSA	-0.00956688	4.04473	-0.0608544	0.951522	0.972465	-6.69626
ENSG00000064607	SUGP2	-0.35377	0.711526	-2.71846	0.00700262	0.0327788	-2.94344
ENSG00000064666	CNN2	0.131902	5.19318	1.13295	0.258284	0.418596	-6.06104
ENSG00000064687	ABCA7	-0.0992779	2.21498	-0.650179	0.516154	0.66838	-6.45439
ENSG00000064726	BTBD1	-0.429189	1.66329	-2.26047	0.0246242	0.0807257	-4.13575
ENSG00000064763	FAR2	0.166341	1.97083	1.10448	0.27041	0.431919	-6.02684
ENSG00000064886	CHI3L2	0.389946	-0.152895	1.67268	0.0955995	0.209976	-4.94629
ENSG00000064932	SBNO2	0.380527	5.11082	2.74798	0.00641865	0.0308522	-3.01616
ENSG00000064961	HMG20B	-0.515962	0.993198	-3.43303	0.000694956	0.00570571	-0.903208
ENSG00000064995	TAF11	0.0447854	0.0173255	0.339903	0.734205	0.834586	-6.30701
ENSG00000064999	ANKS1A	-0.272859	0.826357	-2.07342	0.0391244	0.112832	-4.42685
ENSG00000065000	AP3D1	-0.0569365	2.72457	-0.555971	0.578712	0.716674	-6.5251
ENSG00000065029	ZNF76	-0.280661	0.209724	-1.82108	0.0697504	0.167961	-4.82167
ENSG00000065054	SLC9A3R2	-1.13775	0.118628	-4.34925	1.96738e-05	0.000362675	2.47301
ENSG00000065135	GNAI3	0.36426	1.37211	2.67506	0.00794844	0.0360407	-3.08777
ENSG00000065150	IPO5	-0.700516	0.628471	-3.94393	0.000103299	0.00137602	0.900827
ENSG00000065154	OAT	-0.136732	1.23205	-0.825278	0.409975	0.574082	-6.25218
ENSG00000065243	PKN2	0.0489614	1.44993	0.297393	0.766405	0.85655	-6.53954
ENSG00000065268	WDR18	-0.545093	-0.0638956	-2.48785	0.0134829	0.0523159	-3.42491
ENSG00000065357	DGKA	0.02031	3.25155	0.119798	0.904736	0.944345	-6.68101
ENSG00000065361	ERBB3	-0.533849	1.21459	-1.79735	0.073448	0.174601	-5.0122
ENSG00000065413	ANKRD44	0.273329	3.13223	1.43047	0.15379	0.291698	-5.67508
ENSG00000065427	KARS1	0.398124	2.00326	2.2182	0.027411	0.087523	-4.21595
ENSG00000065457	ADAT1	0.295184	1.91022	1.49509	0.136111	0.268405	-5.52573
ENSG00000065518	NDUFB4	-0.307706	1.90637	-1.53585	0.125799	0.254128	-5.48008
ENSG00000065526	SPEN	-0.0561666	1.52431	-0.467374	0.640626	0.76431	-6.49886
ENSG00000065548	ZC3H15	0.118719	1.66393	0.891348	0.373571	0.53803	-6.21983
ENSG00000065559	MAP2K4	-0.00217368	1.22927	-0.0125688	0.989981	0.994934	-6.56852
ENSG00000065600	PACC1	0.21275	-0.374206	1.03836	0.300072	0.463212	-5.75146
ENSG00000065613	SLK	0.323303	2.10294	1.96567	0.0504069	0.133965	-4.74106
ENSG00000065615	CYB5R4	0.423274	2.86176	2.57004	0.0107297	0.0443858	-3.44906
ENSG00000065621	GSTO2	0.0442224	0.462372	0.240925	0.809805	0.886027	-6.43833
ENSG00000065665	SEC61A2	-0.182397	-0.200247	-0.748901	0.454598	0.615636	-6.06531
ENSG00000065717	TLE2	-1.01308	-0.817724	-4.09092	5.74509e-05	0.000872757	1.57081
ENSG00000065802	ASB1	-0.170792	0.135401	-0.958507	0.338703	0.504972	-5.95718
ENSG00000065809	FAM107B	0.0861283	4.04595	0.601543	0.548006	0.693448	-6.51924
ENSG00000065882	TBC1D1	0.0284887	2.79279	0.236826	0.81298	0.887247	-6.65154
ENSG00000065883	CDK13	-0.0373022	1.8616	-0.349465	0.727025	0.828768	-6.57205
ENSG00000065911	MTHFD2	0.542793	2.75071	3.36741	0.000874369	0.00675082	-1.18323
ENSG00000065923	SLC9A7	-0.0923593	-0.47853	-0.424245	0.67174	0.788836	-6.20359
ENSG00000065970	FOXJ2	-0.191499	-0.0794336	-1.48834	0.137879	0.270699	-5.29238
ENSG00000065978	YBX1	-0.726551	4.24699	-4.25475	2.92902e-05	0.000501447	1.94974
ENSG00000065989	PDE4A	0.118221	1.35698	0.788499	0.431127	0.593839	-6.27583
ENSG00000066027	PPP2R5A	0.372232	1.45161	2.44731	0.0150591	0.0570109	-3.66316
ENSG00000066044	ELAVL1	-0.294793	0.539201	-1.75366	0.0806735	0.185679	-4.99443
ENSG00000066084	DIP2B	0.498552	2.08703	3.417	0.000735301	0.00594277	-0.989499
ENSG00000066117	SMARCD1	-0.0712802	0.852503	-0.489258	0.625074	0.752013	-6.40517
ENSG00000066135	KDM4A	-0.221211	0.106224	-1.39387	0.164554	0.306511	-5.42604
ENSG00000066136	NFYC	0.179075	2.50117	1.50498	0.133551	0.265216	-5.54903
ENSG00000066294	CD84	0.750724	1.15013	3.00915	0.00287868	0.0170197	-2.13175
ENSG00000066322	ELOVL1	0.043812	1.97517	0.340628	0.73366	0.83416	-6.57937
ENSG00000066336	SPI1	0.129395	6.2287	1.09495	0.274559	0.435437	-6.09029
ENSG00000066379	ZNRD1	0.306604	-0.135944	1.38368	0.16765	0.310335	-5.40224
ENSG00000066422	ZBTB11	-0.032818	0.109924	-0.23257	0.81628	0.889676	-6.36927
ENSG00000066427	ATXN3	-0.270994	1.34513	-1.57266	0.117021	0.241499	-5.3801
ENSG00000066455	GOLGA5	0.414369	0.346021	2.24395	0.0256828	0.0834945	-3.97154
ENSG00000066629	EML1	-1.08298	-0.268747	-4.50905	9.8837e-06	0.000210596	3.15606
ENSG00000066654	THUMPD1	-0.530749	0.34219	-3.46963	0.000610499	0.00514286	-0.692934
ENSG00000066739	ATG2B	-0.131929	-0.0902425	-0.658838	0.510586	0.663724	-6.13254
ENSG00000066777	ARFGEF1	0.213887	1.85473	1.77062	0.0778034	0.181368	-5.09015
ENSG00000066827	ZFAT	0.167587	0.0668432	0.879534	0.379929	0.543845	-6.00214
ENSG00000066855	MTFR1	0.0156979	0.800414	0.0693143	0.944793	0.968881	-6.51621
ENSG00000066923	STAG3	-0.107809	1.12335	-0.601193	0.548238	0.693594	-6.39421
ENSG00000066933	MYO9A	-0.207765	0.379501	-1.10759	0.26907	0.430518	-5.86965
ENSG00000067048	DDX3Y	0.218315	0.98519	0.956332	0.339798	0.50588	-5.96584
ENSG00000067057	PFKP	0.0738433	1.71128	0.406611	0.68463	0.798449	-6.54216
ENSG00000067064	IDI1	0.667854	2.54304	3.3514	0.000924245	0.00706387	-1.22324
ENSG00000067066	SP100	0.861296	4.92591	6.65886	1.6485e-10	3.00516e-08	13.5114
ENSG00000067082	KLF6	0.485853	5.65407	3.70451	0.000259016	0.00270647	-0.0839249
ENSG00000067167	TRAM1	0.0129353	2.22234	0.0819618	0.934741	0.963013	-6.64635
ENSG00000067182	TNFRSF1A	0.178793	5.14478	1.33609	0.182695	0.329748	-5.8154
ENSG00000067208	EVI5	-0.655977	0.950519	-3.18692	0.00161483	0.0109863	-1.6677
ENSG00000067225	PKM	-0.162088	5.53125	-1.20381	0.229765	0.387828	-5.97421
ENSG00000067334	DNTTIP2	0.364442	2.5099	2.26561	0.024303	0.0799862	-4.15484
ENSG00000067365	METTL22	-0.224395	2.077	-1.26334	0.207604	0.36107	-5.86833
ENSG00000067369	TP53BP1	-0.176657	1.22159	-1.14403	0.253671	0.413638	-5.93681
ENSG00000067560	RHOA	-0.051987	5.76384	-0.403381	0.687002	0.800431	-6.60681
ENSG00000067596	DHX8	0.0784407	1.59883	0.595	0.552364	0.696754	-6.42504
ENSG00000067606	PRKCZ	-0.903806	0.00602775	-3.82742	0.000162497	0.00193659	0.525821
ENSG00000067704	IARS2	-0.72732	-0.129933	-4.07034	6.2434e-05	0.000931213	1.44223
ENSG00000067798	NAV3	-0.493164	-0.393352	-1.51394	0.131264	0.261784	-5.21721
ENSG00000067829	IDH3G	-0.0873886	1.47965	-0.542192	0.588153	0.723451	-6.44967
ENSG00000067836	ROGDI	-0.635391	0.480453	-3.42476	0.000715518	0.00584018	-0.869678
ENSG00000067900	ROCK1	0.125416	2.76131	0.964088	0.335903	0.501841	-6.21772
ENSG00000067955	CBFB	0.0485694	2.26395	0.348042	0.728092	0.829553	-6.60037
ENSG00000068024	HDAC4	0.33196	3.5101	2.30453	0.0219863	0.0742737	-4.09378
ENSG00000068028	RASSF1	0.01976	-0.251782	0.12259	0.902527	0.943652	-6.32429
ENSG00000068079	IFI35	0.971482	2.9899	3.90399	0.0001208	0.00154837	0.657642
ENSG00000068097	HEATR6	-0.12451	0.710152	-0.661573	0.508834	0.663133	-6.27827
ENSG00000068120	COASY	-0.1967	1.11161	-1.42829	0.154417	0.292435	-5.56147
ENSG00000068305	MEF2A	0.428887	2.50488	3.05219	0.00250866	0.0154442	-2.13408
ENSG00000068308	OTUD5	0.51958	2.23548	4.20097	3.66235e-05	0.000604902	1.78156
ENSG00000068323	TFE3	0.298818	3.22584	2.07269	0.0391928	0.112976	-4.58213
ENSG00000068366	ACSL4	0.31749	3.04498	1.99839	0.0467217	0.127369	-4.72295
ENSG00000068383	INPP5A	0.2573	1.44146	1.36615	0.17308	0.317225	-5.66247
ENSG00000068400	GRIPAP1	0.296713	3.11289	2.11509	0.0353791	0.105569	-4.49046
ENSG00000068438	FTSJ1	-0.131072	-0.0658689	-0.659782	0.509982	0.663648	-6.16047
ENSG00000068650	ATP11A	0.118469	3.40147	0.85653	0.392498	0.556736	-6.33019
ENSG00000068654	POLR1A	-0.419685	-0.210761	-2.03939	0.0424285	0.119333	-4.3518
ENSG00000068697	LAPTM4A	-0.139746	3.00767	-0.954794	0.340574	0.506513	-6.23392
ENSG00000068724	TTC7A	-0.219554	1.50581	-1.43363	0.152885	0.29071	-5.59733
ENSG00000068745	IP6K2	0.306499	2.08916	2.42754	0.0158854	0.0590815	-3.76415
ENSG00000068784	SRBD1	0.64191	0.761109	2.81424	0.00526532	0.0267036	-2.62207
ENSG00000068796	KIF2A	-0.0279535	0.655354	-0.159282	0.873571	0.925201	-6.46525
ENSG00000068831	RASGRP2	0.092781	2.40752	0.559974	0.575982	0.714732	-6.51193
ENSG00000068878	PSME4	-0.438206	1.12605	-2.99472	0.00301355	0.0176475	-2.24137
ENSG00000068885	IFT80	-0.331961	0.450504	-1.58758	0.113605	0.236483	-5.23079
ENSG00000068903	SIRT2	-0.248162	1.81446	-1.887	0.0602816	0.151497	-4.89033
ENSG00000068912	ERLEC1	0.0406538	0.563316	0.235195	0.814244	0.888233	-6.43213
ENSG00000068971	PPP2R5B	-0.294121	0.109252	-1.78978	0.0746593	0.176543	-4.87735
ENSG00000068976	PYGM	0.0665025	-0.234843	0.268088	0.788845	0.871244	-6.30025
ENSG00000069011	PITX1	-0.998593	-0.438403	-4.26021	2.86294e-05	0.000494341	2.17904
ENSG00000069020	MAST4	-0.553919	0.321403	-2.39577	0.0172975	0.0629952	-3.67813
ENSG00000069248	NUP133	-0.194417	0.586179	-1.06884	0.286141	0.448031	-5.93313
ENSG00000069275	NUCKS1	-0.630257	0.338958	-2.82211	0.00514167	0.0262388	-2.62916
ENSG00000069329	VPS35	-0.0830965	2.3655	-0.659353	0.510256	0.663648	-6.44807
ENSG00000069345	DNAJA2	-0.177911	1.78483	-1.75352	0.0806983	0.185693	-5.12383
ENSG00000069399	BCL3	0.469139	5.3763	3.10122	0.00214082	0.0137113	-2.02589
ENSG00000069424	KCNAB2	-0.220565	3.2369	-1.35908	0.175306	0.320169	-5.78376
ENSG00000069493	CLEC2D	0.782155	1.08673	3.68752	0.000275996	0.00281837	0.00526704
ENSG00000069667	RORA	-0.563675	-0.047141	-2.59956	0.00987124	0.0421168	-3.13523
ENSG00000069849	ATP1B3	0.229072	3.23299	1.36713	0.172774	0.316896	-5.76798
ENSG00000069869	NEDD4	-0.502681	3.33536	-1.52022	0.129679	0.259622	-5.5567
ENSG00000069943	PIGB	0.268019	1.54298	1.40827	0.160252	0.300595	-5.62046
ENSG00000069956	MAPK6	0.349394	2.33575	2.36215	0.0189113	0.0671824	-3.9294
ENSG00000069974	RAB27A	0.399628	3.10509	2.20154	0.0285817	0.090208	-4.30778
ENSG00000070010	UFD1	-0.0260243	1.638	-0.188923	0.850301	0.910317	-6.5995
ENSG00000070047	PHRF1	0.214718	0.877208	1.50986	0.132302	0.26332	-5.39772
ENSG00000070081	NUCB2	-0.367994	2.13851	-1.97245	0.0496248	0.132638	-4.74876
ENSG00000070087	PFN2	-0.637872	0.426602	-2.9196	0.00381398	0.0211639	-2.37902
ENSG00000070190	DAPP1	1.21983	2.3158	5.30712	2.39777e-07	1.01303e-05	6.56548
ENSG00000070214	SLC44A1	0.0775228	0.135713	0.403742	0.686736	0.800217	-6.30957
ENSG00000070269	TMEM260	0.236114	1.33901	1.35908	0.175306	0.320169	-5.6559
ENSG00000070366	SMG6	-0.0403655	1.03222	-0.214425	0.830385	0.898078	-6.53071
ENSG00000070367	EXOC5	-0.0917546	1.36453	-0.670981	0.502832	0.657966	-6.36645
ENSG00000070413	DGCR2	0.27098	1.50973	1.79512	0.0738033	0.175107	-4.99819
ENSG00000070423	RNF126	-0.580032	0.292717	-3.53933	0.000475556	0.00421745	-0.475214
ENSG00000070444	MNT	-0.158051	2.16462	-0.960509	0.337697	0.503916	-6.20457
ENSG00000070476	ZXDC	-0.0978247	0.806082	-0.858139	0.391611	0.555878	-6.15994
ENSG00000070495	JMJD6	0.32093	2.84969	2.22862	0.0266998	0.0857355	-4.24656
ENSG00000070501	POLB	0.195828	1.50529	1.03783	0.300319	0.463332	-6.0481
ENSG00000070526	ST6GALNAC1	-0.528358	0.180298	-1.98374	0.0483431	0.130416	-4.52437
ENSG00000070540	WIPI1	-0.189683	1.97427	-1.27107	0.204846	0.35741	-5.84299
ENSG00000070610	GBA2	0.141283	1.82013	1.13875	0.255861	0.415832	-5.99168
ENSG00000070614	NDST1	-0.129193	1.80654	-0.720896	0.471625	0.630114	-6.38229
ENSG00000070669	ASNS	-0.0502341	-0.297642	-0.233329	0.815691	0.889516	-6.29674
ENSG00000070729	CNGB1	0.227504	0.0725476	0.759254	0.448393	0.610087	-6.08599
ENSG00000070731	ST6GALNAC2	-0.190276	1.31788	-1.0773	0.28235	0.444215	-6.0214
ENSG00000070756	PABPC1	-0.285226	5.01676	-2.35394	0.0193249	0.067941	-3.98351
ENSG00000070761	CFAP20	-0.304326	-0.225464	-1.29689	0.195824	0.34652	-5.5092
ENSG00000070770	CSNK2A2	-0.223146	0.876709	-1.67212	0.0957111	0.210121	-5.16238
ENSG00000070814	TCOF1	0.1555	0.447697	0.892491	0.37296	0.537622	-6.04827
ENSG00000070831	CDC42	-0.0104443	4.65808	-0.116494	0.907352	0.945446	-6.6908
ENSG00000070882	OSBPL3	-0.0959288	1.20449	-0.605674	0.545263	0.691418	-6.3906
ENSG00000070961	ATP2B1	0.150721	3.76716	0.697674	0.486008	0.643219	-6.45647
ENSG00000071051	NCK2	-0.0203887	0.932654	-0.133066	0.894245	0.938281	-6.52432
ENSG00000071054	MAP4K4	0.384858	4.23447	2.36632	0.0187041	0.0666387	-3.95913
ENSG00000071073	MGAT4A	0.404364	1.43666	2.18115	0.0300738	0.093764	-4.23348
ENSG00000071082	RPL31	-0.415786	4.4647	-2.153	0.0322445	0.0985759	-4.4261
ENSG00000071127	WDR1	-0.0604461	5.24776	-0.656527	0.51207	0.665015	-6.4794
ENSG00000071189	SNX13	0.238553	1.83606	1.87012	0.0625973	0.155687	-4.90559
ENSG00000071205	ARHGAP10	0.00115135	-0.267629	0.00648853	0.994828	0.997249	-6.34173
ENSG00000071243	ING3	0.453617	0.312493	2.6004	0.00984775	0.0420745	-3.10626
ENSG00000071246	VASH1	0.115736	0.512307	0.512966	0.608414	0.738662	-6.30994
ENSG00000071462	BUD23	-0.272578	1.17345	-1.6175	0.10699	0.226642	-5.30189
ENSG00000071537	SEL1L	-0.0115136	2.35457	-0.0738531	0.941184	0.966919	-6.66171
ENSG00000071553	ATP6AP1	-0.0519413	3.72307	-0.323561	0.746532	0.843533	-6.64436
ENSG00000071564	TCF3	0.207594	1.20258	1.02049	0.308452	0.472371	-6.04289
ENSG00000071575	TRIB2	0.0931773	-0.152708	0.340918	0.733442	0.834008	-6.19323
ENSG00000071626	DAZAP1	-0.105183	1.94374	-0.681593	0.496107	0.6522	-6.41526
ENSG00000071655	MBD3	-0.513531	0.546922	-2.66595	0.00816092	0.0366999	-3.07259
ENSG00000071859	FAM50A	0.304671	2.66364	1.89142	0.059686	0.150646	-4.91849
ENSG00000071889	FAM3A	-0.39141	0.311312	-2.40212	0.0170066	0.0622691	-3.67473
ENSG00000071894	CPSF1	-0.254861	1.17289	-1.61617	0.107277	0.226901	-5.29683
ENSG00000071994	PDCD2	-0.370024	0.235595	-2.17759	0.0303416	0.0943407	-4.14296
ENSG00000072042	RDH11	-0.427068	0.352025	-2.32882	0.0206399	0.0709469	-3.83004
ENSG00000072062	PRKACA	-0.304545	2.47	-2.55444	0.01121	0.0457321	-3.48999
ENSG00000072071	ADGRL1	-0.403499	-0.0939573	-2.09382	0.0372509	0.109234	-4.25948
ENSG00000072080	SPP2	-0.571379	-0.491209	-1.50461	0.133645	0.265296	-5.20328
ENSG00000072110	ACTN1	-0.201156	4.80668	-1.75175	0.0810029	0.186263	-5.18798
ENSG00000072121	ZFYVE26	0.350959	1.66862	2.26678	0.0242306	0.0798548	-4.08644
ENSG00000072134	EPN2	-0.774491	0.56663	-3.171	0.00170242	0.0114707	-1.65806
ENSG00000072135	PTPN18	-0.292436	2.01458	-2.10513	0.0362456	0.107277	-4.4815
ENSG00000072210	ALDH3A2	-0.865719	0.977334	-4.76343	3.17614e-06	8.42746e-05	4.11934
ENSG00000072274	TFRC	-0.711981	3.73219	-3.46069	0.000630182	0.00527509	-0.910595
ENSG00000072310	SREBF1	0.0236117	2.76073	0.183071	0.854886	0.913731	-6.6621
ENSG00000072364	AFF4	0.0591303	2.78318	0.545775	0.585692	0.721426	-6.53031
ENSG00000072401	UBE2D1	0.483861	2.89877	3.06768	0.00238658	0.0148599	-2.10603
ENSG00000072415	MPP5	0.239106	0.0445666	1.41173	0.159234	0.299198	-5.41171
ENSG00000072501	SMC1A	-0.146914	1.13955	-0.869302	0.385489	0.549327	-6.19396
ENSG00000072506	HSD17B10	-0.361885	0.285096	-1.91713	0.0563238	0.144201	-4.66777
ENSG00000072518	MARK2	0.358357	2.98318	3.3168	0.00104128	0.00780679	-1.35879
ENSG00000072609	CHFR	0.196414	2.92415	1.75723	0.0800626	0.185052	-5.16521
ENSG00000072682	P4HA2	-0.98421	0.882967	-4.11301	5.25256e-05	0.000812991	1.49648
ENSG00000072694	FCGR2B	0.809988	2.17585	3.71058	0.000253191	0.00267133	-0.00702212
ENSG00000072736	NFATC3	0.281177	0.718643	2.28859	0.0229103	0.076625	-3.93154
ENSG00000072756	TRNT1	0.147524	0.618274	0.773477	0.439947	0.60231	-6.17563
ENSG00000072778	ACADVL	-0.511224	3.881	-3.49766	0.000552403	0.00475753	-0.789939
ENSG00000072786	STK10	0.0299829	4.69555	0.19966	0.841903	0.905363	-6.67727
ENSG00000072803	FBXW11	0.172175	1.65772	1.13969	0.255473	0.415544	-5.96928
ENSG00000072818	ACAP1	0.0679771	3.18641	0.381534	0.70312	0.812003	-6.614
ENSG00000072849	DERL2	0.201345	1.49856	1.30882	0.191759	0.341229	-5.75123
ENSG00000072858	SIDT1	-0.525319	-0.298852	-2.14751	0.0326829	0.0995763	-4.10877
ENSG00000072864	NDE1	-0.0747632	2.3308	-0.603765	0.546529	0.692411	-6.48521
ENSG00000072952	MRVI1	0.252862	0.596684	1.16867	0.243613	0.403233	-5.79126
ENSG00000072958	AP1M1	-0.0814335	2.10528	-0.560762	0.575446	0.714517	-6.49858
ENSG00000073008	PVR	-0.896935	-0.111169	-5.45866	1.12458e-07	5.50766e-06	7.34788
ENSG00000073050	XRCC1	-0.475822	0.312547	-2.97126	0.00324526	0.0186168	-2.20358
ENSG00000073060	SCARB1	-1.01001	0.0263771	-5.62548	4.79922e-08	2.79548e-06	8.14775
ENSG00000073169	SELENOO	0.0197838	0.163037	0.116571	0.90729	0.945446	-6.37549
ENSG00000073331	ALPK1	0.121603	3.28469	0.721144	0.471473	0.63005	-6.43234
ENSG00000073350	LLGL2	-1.236	0.703976	-5.15187	5.12266e-07	1.88162e-05	5.86778
ENSG00000073417	PDE8A	-0.532174	0.989437	-2.88811	0.00420391	0.0228404	-2.53499
ENSG00000073578	SDHA	-0.462436	1.84626	-3.53699	0.000479591	0.00424911	-0.612947
ENSG00000073584	SMARCE1	-0.0686393	1.55323	-0.526833	0.598762	0.731487	-6.46879
ENSG00000073614	KDM5A	0.13475	2.59933	1.07538	0.283209	0.445111	-6.09417
ENSG00000073737	DHRS9	0.00636266	1.26271	0.0270446	0.978445	0.986862	-6.56182
ENSG00000073756	PTGS2	0.274491	4.94688	0.797994	0.425607	0.588934	-6.38006
ENSG00000073792	IGF2BP2	-0.354544	0.849048	-1.449	0.148549	0.284996	-5.51243
ENSG00000073803	MAP3K13	-0.104086	1.20548	-0.618897	0.536529	0.684765	-6.38207
ENSG00000073849	ST6GAL1	0.0417248	1.28306	0.230732	0.817706	0.890382	-6.54092
ENSG00000073910	FRY	-0.517193	0.447056	-2.85798	0.00461079	0.0244122	-2.54252
ENSG00000073921	PICALM	0.272225	5.47112	2.07961	0.0385472	0.111853	-4.5719
ENSG00000073969	NSF	0.180758	1.46388	1.18674	0.23642	0.396341	-5.88748
ENSG00000074054	CLASP1	0.205546	1.68262	1.4836	0.139135	0.2725	-5.52176
ENSG00000074071	MRPS34	-0.459943	-0.0934566	-2.05122	0.0412534	0.116897	-4.34703
ENSG00000074201	CLNS1A	-0.185697	1.41792	-1.04197	0.298401	0.461287	-6.0583
ENSG00000074319	TSG101	0.321633	2.25673	2.44407	0.0151915	0.0573191	-3.73277
ENSG00000074356	NCBP3	-0.495446	0.896758	-3.22101	0.00144106	0.0101111	-1.55089
ENSG00000074370	ATP2A3	0.278169	2.71258	1.64014	0.102193	0.219804	-5.35338
ENSG00000074416	MGLL	0.112022	2.2607	0.444927	0.656745	0.777137	-6.56561
ENSG00000074603	DPP8	0.345554	1.09727	2.42638	0.0159351	0.0591945	-3.66749
ENSG00000074621	SLC24A1	0.415391	0.18281	1.93007	0.0546923	0.141682	-4.56722
ENSG00000074657	ZNF532	-0.564097	0.28859	-2.26334	0.0244449	0.0803993	-3.97671
ENSG00000074660	SCARF1	0.482778	2.83532	1.9713	0.0497562	0.132835	-4.77157
ENSG00000074695	LMAN1	-0.827243	0.312404	-4.68221	4.58747e-06	0.000111229	3.827
ENSG00000074696	HACD3	-0.499873	0.133399	-2.69912	0.00741074	0.0342334	-2.91865
ENSG00000074706	IPCEF1	0.427016	0.97845	1.97405	0.0494409	0.13229	-4.6061
ENSG00000074755	ZZEF1	0.177471	1.92173	1.71681	0.0872126	0.196818	-5.18572
ENSG00000074800	ENO1	-0.235287	5.06957	-1.82912	0.0685332	0.165759	-5.05005
ENSG00000074842	MYDGF	-0.360263	1.84901	-2.0088	0.0455986	0.125041	-4.6695
ENSG00000074935	TUBE1	-0.462455	0.35477	-1.98647	0.0480375	0.129805	-4.5434
ENSG00000074964	ARHGEF10L	-0.00226902	1.70557	-0.0116844	0.990686	0.995197	-6.60931
ENSG00000075089	ACTR6	-0.22237	0.335471	-0.988624	0.323772	0.488404	-5.97499
ENSG00000075142	SRI	-0.356194	2.07659	-2.08427	0.0381174	0.111179	-4.52015
ENSG00000075151	EIF4G3	0.631262	2.74665	4.65239	5.24391e-06	0.000123932	3.59905
ENSG00000075223	SEMA3C	-1.13433	0.917272	-5.96953	7.81999e-09	6.68064e-07	9.83674
ENSG00000075234	TTC38	-0.25428	0.946668	-1.16593	0.244717	0.404194	-5.85316
ENSG00000075239	ACAT1	-0.470214	1.18508	-2.47505	0.0139636	0.0539261	-3.60411
ENSG00000075240	GRAMD4	0.224192	1.28997	1.01626	0.310454	0.474183	-6.0571
ENSG00000075275	CELSR1	-1.35825	-0.422608	-5.97331	7.66212e-09	6.61631e-07	9.89221
ENSG00000075292	ZNF638	0.413028	3.58239	2.65939	0.00831721	0.0372496	-3.24341
ENSG00000075303	SLC25A40	0.377512	0.917153	1.75601	0.080271	0.185316	-5.0018
ENSG00000075399	VPS9D1	0.120933	3.55946	0.592357	0.554129	0.698176	-6.52067
ENSG00000075407	ZNF37A	-0.302189	-0.0782806	-1.73606	0.0837446	0.191006	-4.91041
ENSG00000075413	MARK3	0.30917	3.35399	3.045	0.00256731	0.0156405	-2.18813
ENSG00000075415	SLC25A3	-0.436385	3.21685	-3.46626	0.000617844	0.00518504	-0.888875
ENSG00000075420	FNDC3B	0.476365	5.17694	3.48889	0.000569996	0.00487493	-0.81638
ENSG00000075426	FOSL2	0.289827	5.31747	1.97537	0.0492904	0.131967	-4.77853
ENSG00000075539	FRYL	0.0834576	2.1256	0.642336	0.521224	0.672468	-6.44018
ENSG00000075568	TMEM131	0.0444589	1.4071	0.308613	0.757864	0.851367	-6.5294
ENSG00000075624	ACTB	0.0661819	10.0213	0.483852	0.6289	0.755462	-6.5097
ENSG00000075651	PLD1	0.187602	2.21061	0.919201	0.358848	0.524335	-6.23657
ENSG00000075711	DLG1	-0.281977	1.04021	-1.85095	0.0653173	0.160225	-4.8801
ENSG00000075785	RAB7A	0.0939172	4.93375	0.928542	0.353993	0.519872	-6.2707
ENSG00000075790	BCAP29	-0.114588	0.445509	-0.598954	0.549728	0.69465	-6.27303
ENSG00000075856	SART3	-0.0214901	1.29401	-0.150466	0.880514	0.92992	-6.57281
ENSG00000075884	ARHGAP15	0.453036	3.53931	2.22413	0.0270042	0.0864203	-4.26693
ENSG00000075914	EXOSC7	-0.493758	-0.394005	-2.42801	0.0158653	0.0590464	-3.49219
ENSG00000076043	REXO2	-0.0793488	-0.291089	-0.355327	0.722634	0.825916	-6.2817
ENSG00000076053	RBM7	0.667554	1.61284	4.20214	3.64465e-05	0.000603868	1.83604
ENSG00000076067	RBMS2	-0.665384	0.295067	-2.78681	0.00571783	0.028485	-2.6965
ENSG00000076108	BAZ2A	0.258963	3.58102	2.2425	0.0257775	0.0836627	-4.23137
ENSG00000076201	PTPN23	-0.294122	1.15719	-1.77126	0.0776967	0.181266	-5.05052
ENSG00000076242	MLH1	0.0287829	1.19452	0.19892	0.842482	0.905787	-6.54027
ENSG00000076382	SPAG5	-0.446607	0.0735166	-2.22938	0.0266487	0.0856447	-4.01237
ENSG00000076513	ANKRD13A	0.335452	2.90356	2.6001	0.00985615	0.0420745	-3.38184
ENSG00000076554	TPD52	-0.614783	0.0373518	-2.4566	0.0146841	0.0560274	-3.52758
ENSG00000076555	ACACB	-0.41531	1.07247	-1.89843	0.0587532	0.148872	-4.81474
ENSG00000076604	TRAF4	-0.563578	0.989986	-2.57801	0.0104917	0.0437442	-3.33781
ENSG00000076641	PAG1	0.374075	3.48794	1.87454	0.0619844	0.154592	-4.96636
ENSG00000076662	ICAM3	0.276328	3.67792	1.42895	0.154227	0.292249	-5.68785
ENSG00000076685	NT5C2	0.405979	4.15063	3.01217	0.0028512	0.0168978	-2.28862
ENSG00000076924	XAB2	-0.0456377	0.727307	-0.364738	0.715605	0.820997	-6.42774
ENSG00000076928	ARHGEF1	0.235118	4.2093	1.70611	0.0891896	0.199859	-5.26698
ENSG00000076944	STXBP2	0.245145	6.50561	1.49789	0.135381	0.267448	-5.57592
ENSG00000076984	MAP2K7	-0.441069	0.536284	-2.76133	0.00616936	0.0300591	-2.8163
ENSG00000077044	DGKD	-0.00477418	2.58814	-0.0256058	0.979592	0.987618	-6.6732
ENSG00000077097	TOP2B	0.125568	1.06834	0.934157	0.351095	0.516588	-6.10972
ENSG00000077147	TM9SF3	0.193909	2.10887	1.42074	0.156599	0.295431	-5.65063
ENSG00000077150	NFKB2	0.613	4.86661	3.71988	0.000244509	0.00260492	-0.0344822
ENSG00000077157	PPP1R12B	-0.953611	0.497281	-4.99448	1.087e-06	3.50833e-05	5.17005
ENSG00000077232	DNAJC10	-0.176545	0.609798	-0.927845	0.354354	0.520092	-6.06407
ENSG00000077235	GTF3C1	-0.0479134	0.825997	-0.301342	0.763396	0.854545	-6.46585
ENSG00000077238	IL4R	0.0949239	5.52526	0.531756	0.595352	0.728664	-6.55157
ENSG00000077254	USP33	-0.126976	2.2268	-0.816966	0.4147	0.578067	-6.32466
ENSG00000077312	SNRPA	-0.317614	0.938186	-1.78738	0.0750474	0.177205	-4.98237
ENSG00000077327	SPAG6	-1.55748	-0.69787	-5.81505	1.78303e-08	1.28118e-06	9.0899
ENSG00000077380	DYNC1I2	-0.21067	1.94648	-1.38813	0.166294	0.308614	-5.68915
ENSG00000077420	APBB1IP	0.396024	3.66754	2.42233	0.0161098	0.0597532	-3.82511
ENSG00000077454	LRCH4	0.0126762	3.27568	0.0916182	0.927072	0.958213	-6.68813
ENSG00000077458	FAM76B	-0.150611	1.29882	-0.771443	0.441149	0.603233	-6.27161
ENSG00000077463	SIRT6	0.203971	1.12307	1.15691	0.248375	0.40825	-5.89413
ENSG00000077514	POLD3	0.0707357	0.986005	0.452334	0.651408	0.773051	-6.41682
ENSG00000077549	CAPZB	0.207918	4.38022	2.10035	0.0366677	0.108168	-4.53565
ENSG00000077585	GPR137B	0.0652717	2.64923	0.383399	0.701739	0.810951	-6.59903
ENSG00000077684	JADE1	0.00305696	-0.0240988	0.0168887	0.986538	0.992735	-6.3684
ENSG00000077721	UBE2A	-0.0877464	2.3891	-0.675997	0.499647	0.655541	-6.43619
ENSG00000077782	FGFR1	-0.746981	0.200386	-2.85395	0.00466787	0.0245801	-2.55372
ENSG00000077984	CST7	0.599869	4.30027	2.34647	0.0197079	0.0687472	-4.00231
ENSG00000078043	PIAS2	-0.518171	-0.0130179	-2.59615	0.00996713	0.0424012	-3.16116
ENSG00000078061	ARAF	-0.176032	1.73895	-1.51607	0.130725	0.261078	-5.49508
ENSG00000078070	MCCC1	-0.0466669	-0.204557	-0.193994	0.846333	0.908242	-6.29584
ENSG00000078081	LAMP3	1.33653	1.23454	3.80137	0.000179554	0.00208928	0.445697
ENSG00000078098	FAP	1.59847	0.0848877	3.60131	0.000379578	0.00359978	-0.0963456
ENSG00000078114	NEBL	-1.4774	-0.27151	-5.831	1.63874e-08	1.2082e-06	9.17275
ENSG00000078124	ACER3	-0.195026	1.59414	-1.13405	0.257826	0.41806	-5.98258
ENSG00000078140	UBE2K	0.0514225	1.95684	0.341684	0.732866	0.833659	-6.57702
ENSG00000078142	PIK3C3	0.00947568	1.5985	0.0655496	0.947787	0.970058	-6.59647
ENSG00000078269	SYNJ2	0.231762	0.34696	1.37337	0.170829	0.314665	-5.51304
ENSG00000078304	PPP2R5C	0.245563	3.90793	2.19167	0.029296	0.0918559	-4.3431
ENSG00000078369	GNB1	0.170072	4.83725	1.81321	0.0709596	0.170031	-5.08171
ENSG00000078401	EDN1	0.6887	0.427976	2.34034	0.0200275	0.0694925	-3.77736
ENSG00000078403	MLLT10	-0.0911843	1.20633	-0.472081	0.637267	0.76215	-6.4606
ENSG00000078487	ZCWPW1	0.508014	1.35182	2.50301	0.012932	0.0506373	-3.51827
ENSG00000078618	NRDC	0.324812	3.87105	2.76026	0.00618904	0.030131	-2.98406
ENSG00000078668	VDAC3	-0.0191371	1.24065	-0.11568	0.907996	0.945954	-6.56734
ENSG00000078674	PCM1	0.0798957	2.68109	0.537299	0.591524	0.725964	-6.53286
ENSG00000078687	TNRC6C	0.0410328	0.141094	0.232081	0.816659	0.889676	-6.36235
ENSG00000078699	CBFA2T2	-0.0893193	0.0735615	-0.586016	0.558376	0.700836	-6.21532
ENSG00000078747	ITCH	-0.0894827	2.41326	-0.654814	0.51317	0.665829	-6.45076
ENSG00000078804	TP53INP2	0.109616	1.84968	0.636664	0.524907	0.675714	-6.43291
ENSG00000078808	SDF4	-0.0780785	3.0602	-0.62727	0.531036	0.680223	-6.49259
ENSG00000078814	MYH7B	-0.0766861	-0.265875	-0.41314	0.679846	0.795295	-6.24803
ENSG00000078902	TOLLIP	0.111374	2.42748	0.73446	0.463334	0.623692	-6.39971
ENSG00000078967	UBE2D4	-1.16729	0.503453	-3.76204	0.000208547	0.00232495	0.244479
ENSG00000079134	THOC1	-0.788846	0.189656	-4.18443	3.921e-05	0.000640237	1.84456
ENSG00000079215	SLC1A3	0.281423	2.22558	1.34606	0.179462	0.326366	-5.74394
ENSG00000079246	XRCC5	-0.0461499	2.85559	-0.375327	0.707725	0.815026	-6.6119
ENSG00000079263	SP140	1.51793	2.85851	5.90842	1.08544e-08	8.83063e-07	9.50709
ENSG00000079277	MKNK1	-0.0030712	4.34614	-0.0183458	0.985377	0.991825	-6.6981
ENSG00000079308	TNS1	-0.174171	1.98199	-0.833982	0.405061	0.569388	-6.29736
ENSG00000079313	REXO1	-0.349082	1.52852	-1.60115	0.110564	0.231948	-5.36033
ENSG00000079332	SAR1A	0.297002	2.13288	2.3167	0.0213022	0.0727112	-4.02208
ENSG00000079335	CDC14A	0.136016	0.247731	0.880487	0.379414	0.543325	-6.03519
ENSG00000079385	CEACAM1	0.758338	3.53921	3.61218	0.000364752	0.00349282	-0.39126
ENSG00000079387	SENP1	0.253536	0.645496	1.52297	0.12899	0.258768	-5.32933
ENSG00000079432	CIC	-0.0701984	2.31269	-0.468305	0.639961	0.763838	-6.55558
ENSG00000079459	FDFT1	-0.355701	1.80165	-2.3885	0.0176354	0.0637075	-3.85198
ENSG00000079739	PGM1	-0.214197	0.223376	-1.17061	0.242834	0.402429	-5.77022
ENSG00000079785	DDX1	0.0261693	0.0632389	0.127534	0.898617	0.941311	-6.37548
ENSG00000079805	DNM2	-0.400101	4.51751	-3.23153	0.00139108	0.00981986	-1.63711
ENSG00000079819	EPB41L2	-0.495217	0.190948	-2.41029	0.0166386	0.0613677	-3.62575
ENSG00000079950	STX7	0.371187	2.47698	2.57896	0.0104635	0.0437325	-3.41557
ENSG00000079974	RABL2B	-0.93452	0.6613	-4.57044	7.54828e-06	0.000167732	3.32886
ENSG00000079999	KEAP1	0.121781	1.25007	0.732783	0.464355	0.624469	-6.30499
ENSG00000080189	SLC35C2	0.181282	1.13878	1.26736	0.206168	0.359207	-5.77081
ENSG00000080298	RFX3	-0.552748	0.601432	-2.69628	0.00747253	0.0344541	-2.98064
ENSG00000080345	RIF1	0.333184	0.754075	2.4351	0.0155646	0.0582798	-3.59781
ENSG00000080371	RAB21	0.219253	3.02242	1.37138	0.171445	0.315282	-5.75634
ENSG00000080503	SMARCA2	-0.542203	3.16416	-2.32455	0.0208716	0.0715887	-4.04932
ENSG00000080603	SRCAP	-0.243836	1.66339	-1.87589	0.061797	0.154246	-4.89677
ENSG00000080608	PUM3	-0.624168	-0.118691	-2.89627	0.00409957	0.0223828	-2.33742
ENSG00000080802	CNOT4	0.15885	0.89108	1.22641	0.221162	0.377644	-5.77025
ENSG00000080815	PSEN1	0.372581	4.01392	3.03465	0.00265387	0.0160274	-2.22421
ENSG00000080822	CLDND1	0.222662	2.04695	1.35171	0.177651	0.323672	-5.72999
ENSG00000080823	MOK	-0.821079	0.939749	-3.29242	0.00113185	0.00835225	-1.34431
ENSG00000080824	HSP90AA1	-0.120305	5.12254	-0.644998	0.519501	0.671299	-6.48735
ENSG00000080845	DLGAP4	0.00300812	2.22997	0.0252043	0.979911	0.987738	-6.65076
ENSG00000081019	RSBN1	0.113233	0.623072	0.586632	0.557963	0.700731	-6.29478
ENSG00000081041	CXCL2	-0.00295296	4.52113	-0.0105202	0.991614	0.99566	-6.69441
ENSG00000081059	TCF7	0.149208	0.379391	0.721078	0.471513	0.63005	-6.15046
ENSG00000081087	OSTM1	0.238912	2.49141	1.69009	0.0922161	0.20404	-5.2637
ENSG00000081154	PCNP	0.294601	2.03935	1.97123	0.0497645	0.132835	-4.73178
ENSG00000081189	MEF2C	-0.399778	1.64726	-1.35701	0.175964	0.321132	-5.72284
ENSG00000081237	PTPRC	0.438657	6.4371	2.65447	0.0084362	0.0376154	-3.24669
ENSG00000081307	UBA5	-0.6923	-0.143992	-3.24992	0.00130748	0.00935269	-1.33683
ENSG00000081320	STK17B	0.453462	3.81468	2.62853	0.00908882	0.0397457	-3.32433
ENSG00000081665	ZNF506	-0.349958	0.873153	-2.13659	0.0335708	0.101683	-4.32661
ENSG00000081760	AACS	-0.505792	1.10502	-2.30046	0.0222192	0.0749575	-4.00503
ENSG00000081791	DELE1	-0.0186227	1.23047	-0.134939	0.892765	0.937228	-6.56232
ENSG00000081870	HSPB11	-0.335565	-0.279364	-1.48774	0.138039	0.270904	-5.25396
ENSG00000081913	PHLPP1	-0.0172155	0.832077	-0.0913898	0.927254	0.958213	-6.51863
ENSG00000081923	ATP8B1	-0.172278	-0.428956	-0.718835	0.472892	0.631104	-6.03106
ENSG00000082014	SMARCD3	0.502724	1.20492	2.0644	0.0399781	0.114546	-4.44261
ENSG00000082068	WDR70	0.00684873	0.226304	0.0368369	0.970643	0.982319	-6.40484
ENSG00000082074	FYB1	0.846883	4.90695	5.04174	8.68834e-07	2.98007e-05	5.28237
ENSG00000082153	BZW1	0.20213	3.69194	1.71394	0.0877393	0.197644	-5.25159
ENSG00000082212	ME2	-0.0804852	1.75856	-0.683124	0.49514	0.6518	-6.39335
ENSG00000082213	C5orf22	0.00376728	-0.0142025	0.0208656	0.983369	0.990209	-6.36399
ENSG00000082258	CCNT2	0.50416	1.3866	3.16274	0.00174962	0.0117245	-1.73524
ENSG00000082397	EPB41L3	0.0740851	2.67188	0.406537	0.684684	0.798449	-6.59588
ENSG00000082515	MRPL22	-0.322285	-0.216043	-1.48041	0.139981	0.273733	-5.26766
ENSG00000082641	NFE2L1	-0.272406	2.4684	-1.69177	0.0918945	0.203543	-5.26547
ENSG00000082701	GSK3B	0.0265524	1.64295	0.213399	0.831184	0.898646	-6.59066
ENSG00000082781	ITGB5	-1.38346	0.150138	-6.0073	6.37795e-09	5.76005e-07	10.054
ENSG00000082805	ERC1	-0.0917812	1.66016	-0.5499	0.582863	0.719631	-6.47346
ENSG00000082898	XPO1	-0.0238963	2.75569	-0.168332	0.866454	0.920602	-6.66087
ENSG00000082996	RNF13	0.445824	4.6298	2.94116	0.00356631	0.0200955	-2.49126
ENSG00000083099	LYRM2	-0.0435099	0.243321	-0.246442	0.805536	0.882713	-6.36958
ENSG00000083168	KAT6A	0.273174	2.78547	2.21667	0.0275166	0.0877221	-4.26785
ENSG00000083223	TUT7	0.347166	3.26098	2.16878	0.0310115	0.0956683	-4.3828
ENSG00000083290	ULK2	-0.579212	0.322551	-2.50857	0.0127353	0.0500066	-3.4236
ENSG00000083312	TNPO1	-0.000856114	2.41286	-0.00735211	0.99414	0.99698	-6.66515
ENSG00000083444	PLOD1	-0.414851	1.36752	-2.68375	0.00775027	0.0353402	-3.10556
ENSG00000083457	ITGAE	-0.435268	0.728013	-2.52226	0.0122618	0.0486714	-3.45114
ENSG00000083520	DIS3	0.0650996	0.218909	0.490304	0.624335	0.751523	-6.29495
ENSG00000083535	PIBF1	0.158085	-0.256568	0.74787	0.455219	0.616223	-6.02172
ENSG00000083642	PDS5B	0.0497214	0.896759	0.397623	0.691236	0.803938	-6.43745
ENSG00000083799	CYLD	0.62135	2.92189	4.60731	6.41118e-06	0.000145754	3.40111
ENSG00000083828	ZNF586	-0.114377	0.84201	-0.796229	0.42663	0.589935	-6.21671
ENSG00000083844	ZNF264	-0.212451	0.630759	-1.2711	0.204835	0.35741	-5.70468
ENSG00000083845	RPS5	-0.524322	3.60402	-2.64123	0.00876384	0.0386693	-3.29371
ENSG00000083857	FAT1	-0.229555	-0.256631	-0.944783	0.345652	0.510901	-5.90536
ENSG00000083896	YTHDC1	0.263374	2.70838	1.97273	0.0495917	0.132622	-4.76532
ENSG00000083937	CHMP2B	0.875713	2.1199	5.87114	1.32421e-08	1.01051e-06	9.32521
ENSG00000084070	SMAP2	0.361462	4.0826	1.74128	0.0828239	0.189653	-5.2058
ENSG00000084072	PPIE	-0.567657	-0.206931	-2.98518	0.0031059	0.0180235	-2.09951
ENSG00000084073	ZMPSTE24	-0.098123	0.985859	-0.731268	0.465278	0.625454	-6.2772
ENSG00000084090	STARD7	-0.106678	1.25398	-0.65871	0.510668	0.663724	-6.37241
ENSG00000084093	REST	-0.0207838	0.82427	-0.167418	0.867172	0.92081	-6.50746
ENSG00000084110	HAL	0.238484	1.40507	0.876669	0.381481	0.545669	-6.19999
ENSG00000084112	SSH1	-0.268957	1.99385	-1.49855	0.135211	0.267272	-5.54877
ENSG00000084207	GSTP1	-0.843382	3.63132	-3.12735	0.0019657	0.0127641	-1.95179
ENSG00000084234	APLP2	-0.507568	5.07626	-4.3619	1.86432e-05	0.00034627	2.37847
ENSG00000084463	WBP11	-0.0361548	0.75035	-0.255309	0.798687	0.87827	-6.48134
ENSG00000084623	EIF3I	-0.410401	2.03535	-2.66904	0.00808837	0.0364882	-3.1837
ENSG00000084652	TXLNA	-0.0620539	0.577664	-0.437919	0.661811	0.781253	-6.38324
ENSG00000084676	NCOA1	0.124048	2.40275	0.769311	0.442411	0.604371	-6.36794
ENSG00000084733	RAB10	-0.0907549	3.93125	-0.726022	0.468482	0.627935	-6.43689
ENSG00000084754	HADHA	-0.293231	2.18642	-3.01907	0.00278922	0.0166105	-2.23547
ENSG00000084764	MAPRE3	-1.01205	-0.20377	-5.11746	6.04751e-07	2.15695e-05	5.77019
ENSG00000084774	CAD	-0.404744	-0.286978	-1.89661	0.0589945	0.149368	-4.60615
ENSG00000085063	CD59	-0.179505	3.44526	-1.20022	0.231151	0.389632	-5.98234
ENSG00000085117	CD82	0.180256	4.96864	1.06357	0.288518	0.45022	-6.13724
ENSG00000085224	ATRX	0.299702	2.27921	1.85224	0.0651318	0.159969	-4.96827
ENSG00000085231	AK6	0.0627331	0.426479	0.28481	0.776018	0.86269	-6.39754
ENSG00000085265	FCN1	0.26154	1.92666	1.40948	0.159895	0.300097	-5.64348
ENSG00000085276	MECOM	-0.702757	-0.343133	-2.65215	0.00849277	0.037778	-2.9618
ENSG00000085365	SCAMP1	0.134852	0.229952	0.813594	0.416627	0.579521	-6.07991
ENSG00000085415	SEH1L	-0.360508	0.125466	-2.26739	0.0241925	0.0798234	-3.94207
ENSG00000085433	WDR47	0.0478088	0.278401	0.257163	0.797258	0.877724	-6.40205
ENSG00000085449	WDFY1	0.390715	2.59431	2.36185	0.0189259	0.0672101	-3.93258
ENSG00000085491	SLC25A24	0.00335147	1.03178	0.0219045	0.982541	0.989494	-6.53599
ENSG00000085511	MAP3K4	-0.431762	-0.0403836	-2.12652	0.0344078	0.103549	-4.21227
ENSG00000085514	PILRA	0.124476	4.2876	0.719533	0.472463	0.630867	-6.44247
ENSG00000085662	AKR1B1	-1.00823	0.997495	-4.48217	1.11118e-05	0.000231747	2.92798
ENSG00000085719	CPNE3	-0.342667	1.30949	-1.81614	0.0705079	0.169164	-4.96773
ENSG00000085721	RRN3	-0.0272131	0.194475	-0.159173	0.873657	0.925201	-6.40622
ENSG00000085733	CTTN	-0.845892	0.490616	-3.18842	0.0016068	0.0109539	-1.61427
ENSG00000085788	DDHD2	-0.257684	0.0982313	-1.28025	0.201607	0.353563	-5.61345
ENSG00000085831	TTC39A	-0.44537	-0.378312	-1.97754	0.0490435	0.131621	-4.4318
ENSG00000085832	EPS15	0.204848	1.95262	1.75371	0.0806648	0.185679	-5.11808
ENSG00000085871	MGST2	-0.375361	-0.0813051	-1.84241	0.066561	0.162386	-4.73536
ENSG00000085872	CHERP	-0.0793656	0.852904	-0.637448	0.524398	0.675323	-6.33149
ENSG00000085978	ATG16L1	-0.467193	0.693316	-2.7141	0.00709292	0.0330818	-2.94945
ENSG00000085982	USP40	-0.358326	-0.043674	-1.5442	0.123763	0.250891	-5.23821
ENSG00000085998	POMGNT1	-1.27514	-0.321425	-5.94256	9.04013e-09	7.41592e-07	9.73617
ENSG00000086015	MAST2	-0.729597	0.226958	-4.49712	1.04118e-05	0.000220416	3.06104
ENSG00000086061	DNAJA1	0.504196	4.08839	3.3945	0.00079562	0.00628578	-1.12379
ENSG00000086062	B4GALT1	0.234167	3.10498	1.67269	0.0955993	0.209976	-5.31117
ENSG00000086065	CHMP5	0.74448	2.38236	4.5399	8.63432e-06	0.000186395	3.14628
ENSG00000086102	NFX1	-0.158568	0.896094	-1.16941	0.243317	0.40303	-5.86426
ENSG00000086200	IPO11	0.699262	1.58894	2.85135	0.00470499	0.0246886	-2.62206
ENSG00000086232	EIF2AK1	-0.288938	1.04506	-2.02261	0.0441429	0.122341	-4.56129
ENSG00000086300	SNX10	0.376253	4.28916	2.0329	0.0430851	0.120604	-4.67026
ENSG00000086504	MRPL28	-0.206257	1.05194	-1.39483	0.164265	0.306138	-5.59774
ENSG00000086544	ITPKC	0.178335	0.762724	0.886583	0.376128	0.540684	-6.12354
ENSG00000086548	CEACAM6	-0.292207	1.2995	-0.903889	0.366896	0.531918	-6.18228
ENSG00000086589	RBM22	0.279231	1.76682	2.23594	0.02621	0.0846492	-4.17119
ENSG00000086598	TMED2	-0.252172	2.61676	-1.62127	0.106179	0.22541	-5.38387
ENSG00000086619	ERO1B	0.282591	0.0215075	1.44968	0.148361	0.284802	-5.30245
ENSG00000086666	ZFAND6	0.286988	3.03505	2.06776	0.0396578	0.113916	-4.58623
ENSG00000086730	LAT2	0.255286	3.70671	1.92713	0.0550598	0.142318	-4.87215
ENSG00000086758	HUWE1	-0.117906	2.2869	-1.01006	0.313413	0.477222	-6.15786
ENSG00000086848	ALG9	-0.86185	0.38673	-4.03536	7.18568e-05	0.00104023	1.2505
ENSG00000087008	ACOX3	0.215105	0.283329	1.25737	0.209754	0.36346	-5.64223
ENSG00000087074	PPP1R15A	0.647987	6.31582	3.53012	0.000491614	0.0043277	-0.669405
ENSG00000087077	TRIP6	-0.450698	0.362235	-2.45843	0.0146111	0.0558787	-3.54457
ENSG00000087086	FTL	-0.388016	9.57879	-2.34879	0.019588	0.0685065	-3.93344
ENSG00000087087	SRRT	-0.21443	2.44082	-1.6284	0.104659	0.223075	-5.36647
ENSG00000087088	BAX	-0.0946416	2.50386	-0.555038	0.579349	0.716923	-6.52007
ENSG00000087111	PIGS	-0.0704001	0.912065	-0.475434	0.634879	0.760496	-6.4217
ENSG00000087152	ATXN7L3	0.164295	2.58225	1.28761	0.199032	0.350558	-5.85265
ENSG00000087157	PGS1	0.230902	4.36879	1.41931	0.157014	0.295931	-5.70602
ENSG00000087191	PSMC5	0.024637	1.74367	0.165972	0.868309	0.921677	-6.60844
ENSG00000087206	UIMC1	0.0430408	1.94716	0.260215	0.794905	0.876339	-6.59882
ENSG00000087237	CETP	0.745972	-0.248733	3.58203	0.000407285	0.00378952	-0.180688
ENSG00000087253	LPCAT2	0.655974	2.78979	3.37984	0.000837367	0.00653691	-1.14301
ENSG00000087263	OGFOD1	-0.0246063	-0.0709582	-0.12402	0.901396	0.942586	-6.35411
ENSG00000087266	SH3BP2	0.0558157	4.95125	0.416686	0.677254	0.793768	-6.60999
ENSG00000087274	ADD1	0.0017192	3.29408	0.0142593	0.988634	0.994075	-6.69036
ENSG00000087302	RTRAF	0.00696066	1.72116	0.0421616	0.966402	0.980345	-6.62227
ENSG00000087338	GMCL1	0.178253	0.923253	1.03486	0.301701	0.464561	-5.99302
ENSG00000087365	SF3B2	-0.202561	2.9884	-1.90773	0.0575345	0.14651	-4.89791
ENSG00000087460	GNAS	-0.316119	5.02728	-2.84207	0.00483971	0.0251421	-2.76266
ENSG00000087470	DNM1L	-0.201831	1.4246	-1.32512	0.186302	0.33448	-5.7284
ENSG00000087502	ERGIC2	-0.0243795	1.52234	-0.12419	0.901262	0.942586	-6.59774
ENSG00000087589	CASS4	-0.193901	0.576833	-0.781157	0.435425	0.597814	-6.19476
ENSG00000087884	AAMDC	-0.301884	0.389749	-1.21957	0.223741	0.380623	-5.74608
ENSG00000087903	RFX2	-0.271777	2.84088	-1.55325	0.121588	0.247962	-5.49772
ENSG00000088038	CNOT3	0.184106	1.96649	1.28505	0.199925	0.351816	-5.8214
ENSG00000088205	DDX18	-0.0794094	1.20225	-0.593632	0.553278	0.69746	-6.39941
ENSG00000088247	KHSRP	-0.394879	2.57175	-2.63048	0.00903823	0.039596	-3.30592
ENSG00000088256	GNA11	-1.03639	0.43648	-3.99756	8.35588e-05	0.0011734	1.10218
ENSG00000088280	ASAP3	-0.178712	0.330433	-0.678798	0.497873	0.654121	-6.22543
ENSG00000088298	EDEM2	0.321005	1.38218	1.9418	0.0532474	0.139256	-4.72926
ENSG00000088367	EPB41L1	-1.98825	-0.563108	-8.20838	1.07157e-14	1.05485e-11	22.7244
ENSG00000088387	DOCK9	-0.634088	-0.153917	-2.79022	0.00565976	0.0282529	-2.6345
ENSG00000088448	ANKRD10	0.205975	4.71404	0.948673	0.343673	0.509067	-6.25363
ENSG00000088682	COQ9	-0.229482	-0.0596119	-1.11324	0.26664	0.427911	-5.76568
ENSG00000088727	KIF9	-0.7652	-0.67259	-3.6021	0.000378476	0.00359278	-0.144093
ENSG00000088766	CRLS1	-0.276443	-0.0280545	-1.34379	0.180196	0.327158	-5.49893
ENSG00000088808	PPP1R13B	-0.916555	-0.0724431	-4.30137	2.40888e-05	0.000431146	2.30403
ENSG00000088826	SMOX	0.0870156	0.201296	0.390845	0.696234	0.807746	-6.34612
ENSG00000088827	SIGLEC1	1.072	1.42883	2.71746	0.00702321	0.0328587	-2.92093
ENSG00000088832	FKBP1A	0.0404058	4.63348	0.333452	0.739063	0.837883	-6.64278
ENSG00000088833	NSFL1C	0.0753137	2.43944	0.545762	0.5857	0.721426	-6.51672
ENSG00000088836	SLC4A11	-1.1945	-0.335579	-3.92856	0.000109728	0.00144794	0.928881
ENSG00000088930	XRN2	0.34377	1.85624	2.21862	0.027382	0.0874872	-4.20526
ENSG00000088986	DYNLL1	-0.514422	3.22743	-2.40628	0.0168182	0.0617526	-3.86057
ENSG00000088992	TESC	0.514371	0.383104	1.81656	0.0704427	0.169128	-4.76977
ENSG00000089006	SNX5	-0.111087	1.82066	-0.857924	0.391729	0.555966	-6.27082
ENSG00000089009	RPL6	-0.450219	4.06624	-2.72651	0.00683886	0.0322731	-3.07516
ENSG00000089022	MAPKAPK5	-0.406238	0.317458	-2.46779	0.0142434	0.0547064	-3.50216
ENSG00000089041	P2RX7	0.395256	1.76985	1.78269	0.0758105	0.178536	-5.03954
ENSG00000089053	ANAPC5	-0.138728	1.79542	-1.04622	0.296438	0.458826	-6.08822
ENSG00000089057	SLC23A2	0.426312	0.412234	2.32484	0.0208556	0.071559	-3.80187
ENSG00000089060	SLC8B1	-0.2108	2.00217	-1.60932	0.108767	0.229271	-5.37197
ENSG00000089063	TMEM230	-0.329217	1.21858	-2.50577	0.0128341	0.050314	-3.53565
ENSG00000089094	KDM2B	-0.49876	0.703178	-3.14603	0.00184876	0.0122306	-1.74915
ENSG00000089101	CFAP61	-1.63116	-1.04034	-6.2832	1.40009e-09	1.72281e-07	11.4639
ENSG00000089127	OAS1	1.56861	3.55499	4.41904	1.45997e-05	0.000284592	2.63675
ENSG00000089154	GCN1	-0.721341	1.24087	-3.78091	0.000194126	0.00221434	0.256406
ENSG00000089157	RPLP0	-0.577853	4.07979	-2.90093	0.00404096	0.0221488	-2.60428
ENSG00000089159	PXN	-0.0537451	4.20332	-0.335688	0.737379	0.836744	-6.64258
ENSG00000089220	PEBP1	-0.923776	1.43247	-6.56072	2.90613e-10	4.61419e-08	12.9867
ENSG00000089248	ERP29	-0.217055	1.3921	-1.34059	0.181229	0.328247	-5.70917
ENSG00000089280	FUS	0.0775324	4.0106	0.774698	0.439226	0.601774	-6.40142
ENSG00000089289	IGBP1	0.426046	0.645495	2.89361	0.00413325	0.0225417	-2.41356
ENSG00000089327	FXYD5	-0.0511971	3.38856	-0.334752	0.738084	0.837218	-6.63743
ENSG00000089335	ZNF302	-0.697039	-0.348256	-3.07355	0.00234176	0.014683	-1.84789
ENSG00000089351	GRAMD1A	0.437624	5.50037	2.08791	0.0377856	0.110393	-4.55475
ENSG00000089356	FXYD3	-0.991855	0.757869	-2.93096	0.00368155	0.0205799	-2.39759
ENSG00000089486	CDIP1	-0.0183037	0.281066	-0.0941457	0.925066	0.956904	-6.42997
ENSG00000089505	CMTM1	0.559393	1.14294	2.2839	0.023189	0.0773805	-3.98407
ENSG00000089597	GANAB	-0.376675	2.21744	-2.86223	0.00455126	0.0241832	-2.68059
ENSG00000089639	GMIP	0.352981	3.80071	2.38218	0.0179343	0.0645269	-3.92063
ENSG00000089692	LAG3	0.933172	-0.0776899	2.51274	0.0125893	0.0496708	-3.19941
ENSG00000089693	MLF2	-0.0398106	2.88926	-0.312057	0.755249	0.849289	-6.63657
ENSG00000089737	DDX24	-0.307819	1.68457	-2.06533	0.0398886	0.114446	-4.54378
ENSG00000089775	ZBTB25	0.382162	-0.0704184	2.3284	0.0206626	0.0709958	-3.72373
ENSG00000089818	NECAP1	0.271311	2.48542	1.88762	0.0601976	0.151344	-4.91504
ENSG00000089820	ARHGAP4	0.263225	3.24889	1.78061	0.0761502	0.178993	-5.13159
ENSG00000089876	DHX32	-0.702217	-0.415058	-3.10564	0.00211017	0.0135502	-1.72836
ENSG00000089902	RCOR1	-0.0616983	1.67558	-0.399357	0.68996	0.802927	-6.53865
ENSG00000089916	GPATCH2L	0.244513	2.04915	1.92257	0.0556337	0.142949	-4.82692
ENSG00000090006	LTBP4	-0.518625	0.894583	-2.07961	0.038547	0.111853	-4.45084
ENSG00000090013	BLVRB	-0.468064	2.11557	-2.58485	0.010291	0.0432168	-3.40015
ENSG00000090020	SLC9A1	-0.140987	1.26072	-1.08366	0.279524	0.441057	-6.00611
ENSG00000090054	SPTLC1	-0.189545	2.13484	-1.3389	0.181779	0.328759	-5.77164
ENSG00000090060	PAPOLA	0.148056	3.73629	1.46264	0.14478	0.280114	-5.64208
ENSG00000090061	CCNK	0.431072	2.00339	3.61373	0.000362676	0.00347687	-0.344779
ENSG00000090104	RGS1	0.784937	2.47593	2.82502	0.00509657	0.0260619	-2.76076
ENSG00000090238	YPEL3	0.179308	3.65426	0.885853	0.37652	0.54109	-6.30813
ENSG00000090263	MRPS33	-0.978181	-0.436984	-4.07418	6.14719e-05	0.00092105	1.49449
ENSG00000090266	NDUFB2	-0.544008	2.39609	-3.232	0.00138886	0.00981986	-1.61458
ENSG00000090273	NUDC	-0.521725	1.40976	-3.05049	0.00252245	0.0154807	-2.10634
ENSG00000090316	MAEA	-0.106889	3.49904	-0.644894	0.519568	0.671299	-6.49033
ENSG00000090339	ICAM1	1.01429	4.96708	5.78953	2.0401e-08	1.42431e-06	8.87148
ENSG00000090372	STRN4	-0.159366	2.84483	-1.26009	0.208774	0.362527	-5.90199
ENSG00000090376	IRAK3	0.720299	4.22018	3.27835	0.00118742	0.00866492	-1.49185
ENSG00000090382	LYZ	-0.827911	6.13185	-4.55162	8.20103e-06	0.000177821	3.16366
ENSG00000090432	MUL1	0.11878	-0.18044	0.748603	0.454778	0.615795	-6.05238
ENSG00000090487	SPG21	-0.125421	2.90689	-1.1292	0.259863	0.420392	-6.05602
ENSG00000090520	DNAJB11	0.0956644	1.65	0.575414	0.565512	0.707142	-6.44752
ENSG00000090581	GNPTG	-0.110807	2.17543	-0.689604	0.491062	0.647904	-6.42274
ENSG00000090615	GOLGA3	-0.342809	1.27281	-2.15564	0.0320355	0.09809	-4.33279
ENSG00000090621	PABPC4	-0.431996	2.62007	-2.6049	0.00972246	0.0416846	-3.37203
ENSG00000090661	CERS4	-0.34293	0.745603	-1.71909	0.0867963	0.196101	-5.09604
ENSG00000090674	MCOLN1	-0.188727	3.39829	-1.13268	0.258397	0.41864	-6.06187
ENSG00000090686	USP48	-0.175002	1.43132	-1.26988	0.205268	0.357959	-5.80498
ENSG00000090857	PDPR	0.0962449	0.560503	0.677771	0.498523	0.654765	-6.23571
ENSG00000090861	AARS1	-0.480137	0.746432	-2.69392	0.00752415	0.0345949	-3.00865
ENSG00000090863	GLG1	-0.0318481	1.99423	-0.276451	0.782422	0.867459	-6.60127
ENSG00000090905	TNRC6A	-0.315017	0.988938	-1.67011	0.0961076	0.210756	-5.18334
ENSG00000090924	PLEKHG2	0.483215	3.53553	2.37519	0.0182703	0.0654247	-3.93303
ENSG00000090989	EXOC1	0.455558	1.02576	2.76767	0.00605413	0.0296558	-2.80079
ENSG00000091039	OSBPL8	0.289603	3.39761	2.05412	0.0409698	0.116371	-4.62303
ENSG00000091073	DTX2	-0.0883186	3.24514	-0.629819	0.529369	0.678972	-6.49412
ENSG00000091106	NLRC4	0.43753	1.52918	2.1754	0.0305065	0.0946441	-4.26213
ENSG00000091136	LAMB1	-0.543369	0.259957	-2.51131	0.0126391	0.0497485	-3.41106
ENSG00000091140	DLD	-0.324002	1.64705	-2.02102	0.0443088	0.122626	-4.62724
ENSG00000091157	WDR7	-0.116836	0.808151	-0.62286	0.533926	0.682682	-6.32861
ENSG00000091164	TXNL1	0.158144	1.2231	1.16927	0.243373	0.403056	-5.89329
ENSG00000091317	CMTM6	0.275261	4.01455	1.95461	0.0517071	0.136389	-4.82164
ENSG00000091409	ITGA6	-0.565743	-0.291957	-2.68373	0.00775087	0.0353402	-2.8812
ENSG00000091436	MAP3K20	0.396846	1.61518	2.38398	0.017849	0.0643133	-3.82109
ENSG00000091483	FH	-0.713152	-0.459859	-3.25076	0.0013038	0.00934105	-1.28254
ENSG00000091490	SEL1L3	-0.0507165	1.5539	-0.321914	0.747778	0.84425	-6.5559
ENSG00000091527	CDV3	-0.14602	2.9329	-1.19353	0.233758	0.392615	-5.98232
ENSG00000091542	ALKBH5	-0.429165	1.07183	-2.93065	0.00368511	0.0205881	-2.41725
ENSG00000091592	NLRP1	-0.237608	1.53428	-1.44901	0.148548	0.284996	-5.5746
ENSG00000091640	SPAG7	-0.0773165	2.17611	-0.554854	0.579475	0.716987	-6.50349
ENSG00000091651	ORC6	-0.502708	1.97822	-2.56477	0.0108899	0.0447788	-3.44875
ENSG00000092010	PSME1	0.525124	3.90975	3.45266	0.000648395	0.00539088	-0.933777
ENSG00000092020	PPP2R3C	0.633973	2.06947	3.72232	0.000242273	0.00258951	0.0309224
ENSG00000092036	HAUS4	0.453231	2.03524	2.37712	0.0181771	0.0651859	-3.85841
ENSG00000092068	SLC7A8	-1.81778	-0.0069227	-8.17146	1.36703e-14	1.12142e-11	22.5581
ENSG00000092094	OSGEP	-0.270879	0.473777	-1.84662	0.0659453	0.161364	-4.81716
ENSG00000092098	RNF31	0.55654	2.23632	3.85534	0.000145919	0.00178568	0.491838
ENSG00000092108	SCFD1	0.0988468	1.94396	0.6172	0.537646	0.685568	-6.44365
ENSG00000092140	G2E3	0.0200905	0.93131	0.0828931	0.934001	0.962452	-6.52373
ENSG00000092148	HECTD1	-0.0947887	2.05869	-0.652943	0.514373	0.666951	-6.43901
ENSG00000092199	HNRNPC	0.370722	5.29361	3.58456	0.000403541	0.00376173	-0.496334
ENSG00000092201	SUPT16H	-0.235304	0.742234	-1.65597	0.0989421	0.214771	-5.18016
ENSG00000092203	TOX4	0.171315	2.23421	1.38773	0.166415	0.308681	-5.70208
ENSG00000092208	GEMIN2	-0.303298	-0.496758	-1.18328	0.237784	0.397818	-5.61221
ENSG00000092330	TINF2	0.253908	2.4122	2.17832	0.030286	0.0942273	-4.33711
ENSG00000092439	TRPM7	0.337937	1.22239	2.17497	0.0305394	0.0946867	-4.24412
ENSG00000092529	CAPN3	-0.261339	0.4201	-1.63391	0.103495	0.221383	-5.15093
ENSG00000092531	SNAP23	0.320856	3.17955	2.34676	0.0196929	0.068724	-3.9934
ENSG00000092621	PHGDH	-0.500048	-0.505774	-2.03639	0.0427303	0.119942	-4.31774
ENSG00000092820	EZR	-0.274765	3.85569	-1.66203	0.0977186	0.213059	-5.33905
ENSG00000092841	MYL6	-0.260698	6.66965	-2.42914	0.0158169	0.058933	-3.79011
ENSG00000092847	AGO1	-0.149269	-0.0322528	-1.07637	0.282767	0.444677	-5.80873
ENSG00000092871	RFFL	0.22566	2.5643	1.49763	0.135449	0.267528	-5.56627
ENSG00000092929	UNC13D	0.0593042	4.01489	0.377661	0.705993	0.81412	-6.62739
ENSG00000092931	MFSD11	0.212693	1.33686	1.63978	0.102267	0.219817	-5.25819
ENSG00000092964	DPYSL2	-0.529508	1.57429	-3.05335	0.00249934	0.0154157	-2.10305
ENSG00000093000	NUP50	-0.130578	2.47256	-1.06137	0.289512	0.451085	-6.11141
ENSG00000093010	COMT	-0.772619	2.08034	-4.24196	3.08942e-05	0.000521651	1.92785
ENSG00000093072	ADA2	-0.223081	2.49785	-1.32323	0.186929	0.334934	-5.80305
ENSG00000093134	VNN3	0.398049	2.98005	1.77847	0.0765024	0.179521	-5.12475
ENSG00000093144	ECHDC1	-0.113852	1.57055	-0.69555	0.487336	0.644283	-6.37704
ENSG00000093167	LRRFIP2	-0.0701845	2.51657	-0.529125	0.597173	0.730199	-6.52736
ENSG00000093183	SEC22C	-0.252787	0.765111	-1.5486	0.122702	0.249511	-5.35378
ENSG00000094631	HDAC6	-0.131975	1.97593	-0.790087	0.430201	0.593124	-6.33311
ENSG00000094755	GABRP	-0.843725	0.886812	-2.58749	0.0102145	0.0431008	-3.31772
ENSG00000094916	CBX5	-0.218365	0.0246843	-1.66952	0.096225	0.210966	-5.03702
ENSG00000094975	SUCO	0.459763	1.21174	2.63057	0.00903591	0.039596	-3.18613
ENSG00000095015	MAP3K1	0.479649	1.53894	2.84987	0.00472628	0.024739	-2.62695
ENSG00000095059	DHPS	-0.288249	0.787442	-1.7142	0.0876914	0.197582	-5.09115
ENSG00000095066	HOOK2	-0.265793	1.51592	-1.22416	0.222008	0.378717	-5.8831
ENSG00000095139	ARCN1	0.00537961	1.94527	0.044224	0.96476	0.979688	-6.63206
ENSG00000095209	TMEM38B	-0.214296	0.501775	-1.10901	0.268458	0.429917	-5.88065
ENSG00000095261	PSMD5	0.237426	0.233942	1.18526	0.237004	0.397117	-5.7277
ENSG00000095319	NUP188	-0.643535	0.926204	-3.38917	0.00081056	0.00636804	-1.03708
ENSG00000095370	SH2D3C	0.30027	2.15441	1.78373	0.0756412	0.178238	-5.08185
ENSG00000095380	NANS	-0.149029	2.32734	-1.28377	0.200372	0.352269	-5.84991
ENSG00000095383	TBC1D2	0.475076	2.8749	2.3913	0.0175047	0.0634682	-3.8833
ENSG00000095397	WHRN	0.146291	0.90229	0.646625	0.518448	0.670204	-6.31391
ENSG00000095485	CWF19L1	0.134683	0.305331	0.788025	0.431404	0.594033	-6.10473
ENSG00000095564	BTAF1	0.130855	0.559312	0.880529	0.379391	0.543325	-6.07141
ENSG00000095787	WAC	0.480799	3.72227	3.7525	0.000216216	0.00237813	0.0831238
ENSG00000095794	CREM	0.626304	4.606	4.04711	6.85491e-05	0.00100267	1.15116
ENSG00000095906	NUBP2	-0.352313	0.235426	-2.10774	0.0360163	0.106791	-4.29369
ENSG00000095951	HIVEP1	0.695298	3.23966	4.46316	1.20676e-05	0.000244934	2.79571
ENSG00000096060	FKBP5	0.308004	2.75751	1.16418	0.245423	0.40502	-6.00266
ENSG00000096063	SRPK1	0.266335	3.04557	1.48209	0.139535	0.273133	-5.60188
ENSG00000096070	BRPF3	0.102676	0.882947	0.655108	0.512981	0.665672	-6.32256
ENSG00000096080	MRPS18A	0.211081	-0.0164238	1.05922	0.290489	0.452178	-5.81876
ENSG00000096093	EFHC1	-0.456517	2.24497	-1.77566	0.0769653	0.180299	-5.12069
ENSG00000096384	HSP90AB1	-0.31648	4.06541	-1.62078	0.106284	0.225535	-5.40604
ENSG00000096696	DSP	-1.14295	-0.435686	-5.11601	6.08999e-07	2.16426e-05	5.7744
ENSG00000096717	SIRT1	0.800398	0.74063	4.76524	3.14995e-06	8.40329e-05	4.1933
ENSG00000096746	HNRNPH3	0.394453	2.84427	2.74654	0.00644615	0.030939	-3.00185
ENSG00000096872	IFT74	0.0391428	-0.401639	0.169211	0.865763	0.920292	-6.25221
ENSG00000096968	JAK2	0.768972	2.43764	4.47036	1.1697e-05	0.000240526	2.85944
ENSG00000096996	IL12RB1	0.337227	0.473356	1.97078	0.0498165	0.132898	-4.55255
ENSG00000097033	SH3GLB1	0.535978	3.28792	3.10593	0.0021082	0.0135464	-2.00252
ENSG00000099139	PCSK5	-1.5936	3.23956	-2.40471	0.0168894	0.0619446	-3.86641
ENSG00000099194	SCD	-2.58341	0.460085	-9.31118	5.70475e-18	1.12315e-14	30.1139
ENSG00000099203	TMED1	0.292807	0.666878	1.72933	0.0849446	0.193072	-5.02251
ENSG00000099204	ABLIM1	-0.614303	0.2178	-2.66273	0.00823731	0.0369758	-3.02131
ENSG00000099246	RAB18	0.264715	2.40782	1.77292	0.0774194	0.180854	-5.11558
ENSG00000099250	NRP1	-1.04978	0.941878	-4.66083	5.04943e-06	0.000120355	3.68518
ENSG00000099282	TSPAN15	-1.4005	-0.565271	-5.73293	2.74597e-08	1.80209e-06	8.68598
ENSG00000099290	WASHC2A	0.624391	1.91376	3.50965	0.000529182	0.00460997	-0.678952
ENSG00000099308	MAST3	0.086228	2.78221	0.502398	0.615815	0.744636	-6.55727
ENSG00000099326	MZF1	-0.325718	-0.26457	-2.02471	0.0439259	0.121908	-4.37431
ENSG00000099330	OCEL1	-0.60998	-0.267906	-2.71096	0.00715852	0.03335	-2.82476
ENSG00000099331	MYO9B	-0.216675	4.48302	-1.65979	0.0981704	0.2134	-5.3427
ENSG00000099337	KCNK6	0.169524	1.26002	0.769841	0.442097	0.60411	-6.27346
ENSG00000099338	CATSPERG	-0.301123	-0.197203	-1.32339	0.186876	0.3349	-5.50773
ENSG00000099341	PSMD8	-0.409748	2.5435	-3.09247	0.00220255	0.0139793	-2.0356
ENSG00000099364	FBXL19	0.0389966	0.0580614	0.229942	0.818318	0.890606	-6.35083
ENSG00000099377	HSD3B7	0.0536249	0.893215	0.280103	0.779623	0.865524	-6.49962
ENSG00000099622	CIRBP	-0.206025	3.07068	-1.31221	0.190614	0.339867	-5.84194
ENSG00000099624	ATP5F1D	-0.368935	1.51504	-1.96745	0.0502011	0.133519	-4.71957
ENSG00000099725	PRKY	-0.0898081	-0.699334	-0.364551	0.715745	0.820997	-6.13993
ENSG00000099783	HNRNPM	0.149037	3.86296	1.36132	0.174599	0.319353	-5.78402
ENSG00000099785	MARCHF2	-0.0816653	2.24039	-0.561431	0.57499	0.714131	-6.50098
ENSG00000099795	NDUFB7	-0.671361	1.47171	-2.85961	0.00458791	0.0243206	-2.64836
ENSG00000099797	TECR	-0.405883	2.09627	-2.22274	0.0270987	0.0866946	-4.24488
ENSG00000099800	TIMM13	-0.0131125	-0.233801	-0.0553462	0.955905	0.97482	-6.32125
ENSG00000099804	CDC34	-0.0904942	1.63753	-0.589396	0.556111	0.699662	-6.44921
ENSG00000099810	MTAP	-0.190678	0.365195	-0.981504	0.327262	0.492369	-5.98757
ENSG00000099812	MISP	-0.538534	-0.431116	-2.0779	0.0387062	0.112132	-4.23167
ENSG00000099817	POLR2E	-0.543482	2.17717	-3.3029	0.00109207	0.00811956	-1.39087
ENSG00000099821	POLRMT	-0.478978	-0.135537	-2.33799	0.0201511	0.0697601	-3.74383
ENSG00000099860	GADD45B	0.204253	5.20193	1.25003	0.21242	0.366917	-5.92428
ENSG00000099875	MKNK2	-0.154322	3.73965	-0.833766	0.405183	0.569477	-6.35433
ENSG00000099899	TRMT2A	-0.391063	1.12107	-2.05262	0.041116	0.116608	-4.51598
ENSG00000099901	RANBP1	-0.334495	1.17766	-1.75465	0.0805037	0.185505	-5.06809
ENSG00000099904	ZDHHC8	-0.988166	-0.0489122	-5.24496	3.25597e-07	1.30824e-05	6.3379
ENSG00000099910	KLHL22	-0.113821	0.689393	-0.700152	0.484462	0.642357	-6.26434
ENSG00000099917	MED15	-0.0345063	3.33335	-0.325244	0.74526	0.842773	-6.63942
ENSG00000099940	SNAP29	-0.0245606	0.916593	-0.195408	0.845227	0.907649	-6.49206
ENSG00000099942	CRKL	0.101673	1.23667	0.790831	0.429768	0.592691	-6.26284
ENSG00000099949	LZTR1	-0.276287	0.971776	-1.69408	0.0914546	0.203306	-5.14657
ENSG00000099956	SMARCB1	-0.165395	1.86833	-1.3914	0.165301	0.307246	-5.68536
ENSG00000099968	BCL2L13	0.0927128	1.38495	0.589751	0.555873	0.699567	-6.39537
ENSG00000099977	DDT	0.322114	1.16971	1.61882	0.106705	0.226185	-5.27175
ENSG00000099985	OSM	0.351919	4.99449	1.28189	0.201031	0.352943	-5.88581
ENSG00000099991	CABIN1	-0.0759871	1.32014	-0.447756	0.654704	0.775431	-6.49308
ENSG00000099992	TBC1D10A	-0.470301	0.401444	-2.81887	0.0051922	0.0264555	-2.65518
ENSG00000099995	SF3A1	-0.164019	3.26512	-1.21357	0.22602	0.383179	-5.96723
ENSG00000099998	GGT5	0.516789	0.287249	1.97526	0.0493026	0.131967	-4.48063
ENSG00000100014	SPECC1L	0.617458	1.05655	3.29476	0.00112285	0.00830451	-1.29292
ENSG00000100023	PPIL2	-0.547079	0.584446	-2.81273	0.00528931	0.0268115	-2.67084
ENSG00000100024	UPB1	0.818003	1.1838	2.6587	0.00833386	0.0372902	-3.10413
ENSG00000100028	SNRPD3	-0.266166	0.877907	-1.33736	0.182281	0.329261	-5.65166
ENSG00000100029	PES1	-0.486932	0.918882	-3.03248	0.00267237	0.0161095	-2.09387
ENSG00000100030	MAPK1	-0.03383	2.95275	-0.232318	0.816475	0.889676	-6.65722
ENSG00000100031	GGT1	0.0469054	1.6362	0.214209	0.830553	0.898161	-6.59712
ENSG00000100034	PPM1F	-0.0530633	1.91379	-0.304422	0.761051	0.853684	-6.59719
ENSG00000100055	CYTH4	0.148495	5.08947	0.87565	0.382033	0.546142	-6.3167
ENSG00000100060	MFNG	-0.421764	0.834018	-1.97946	0.0488256	0.131237	-4.63804
ENSG00000100075	SLC25A1	-0.723056	0.501821	-4.23927	3.12429e-05	0.000526276	2.01555
ENSG00000100077	GRK3	-0.0453782	0.436217	-0.256742	0.797582	0.877724	-6.42135
ENSG00000100083	GGA1	0.0566886	3.18944	0.40744	0.684022	0.798283	-6.60895
ENSG00000100084	HIRA	-0.0251168	0.0121571	-0.130232	0.896484	0.93991	-6.34519
ENSG00000100092	SH3BP1	0.0692657	2.04727	0.477264	0.633577	0.759491	-6.53027
ENSG00000100097	LGALS1	-0.506982	5.38053	-2.54883	0.0113872	0.0462053	-3.51918
ENSG00000100099	HPS4	-0.180813	0.347198	-1.23836	0.216706	0.371776	-5.69053
ENSG00000100100	PIK3IP1	0.599125	1.93072	3.50781	0.000532689	0.00462824	-0.687259
ENSG00000100106	TRIOBP	-0.0194453	1.91545	-0.176485	0.860051	0.917017	-6.62058
ENSG00000100109	TFIP11	0.0378385	1.84522	0.275029	0.783514	0.867898	-6.59128
ENSG00000100121	GGTLC2	0.262174	0.736086	0.865816	0.387394	0.551499	-6.09909
ENSG00000100124	ANKRD54	-0.529229	0.0234753	-2.74296	0.00651488	0.0311625	-2.78746
ENSG00000100129	EIF3L	-0.391466	2.21233	-2.37564	0.0182483	0.0653697	-3.9069
ENSG00000100138	SNU13	-0.418582	1.2866	-2.29347	0.0226239	0.0759982	-4.02562
ENSG00000100139	MICALL1	-0.127725	1.00174	-0.872325	0.383841	0.548089	-6.18187
ENSG00000100142	POLR2F	-0.255461	1.52775	-1.42495	0.155379	0.294087	-5.61467
ENSG00000100150	DEPDC5	-0.113295	1.25196	-0.658706	0.510671	0.663724	-6.36065
ENSG00000100151	PICK1	-0.610652	-0.11353	-2.93382	0.00364891	0.0204322	-2.25811
ENSG00000100162	CENPM	-1.10546	-0.359722	-3.80082	0.000179928	0.00209116	0.489922
ENSG00000100201	DDX17	-0.00369792	4.66494	-0.0375331	0.970089	0.982046	-6.6967
ENSG00000100207	TCF20	0.156179	0.569119	1.04454	0.297213	0.459664	-5.94091
ENSG00000100211	CBY1	-0.655478	-0.249358	-2.83553	0.00493691	0.0254578	-2.52151
ENSG00000100216	TOMM22	-0.365124	0.129658	-2.34235	0.019922	0.0692242	-3.76
ENSG00000100219	XBP1	0.0594103	3.60225	0.341664	0.732882	0.833659	-6.6376
ENSG00000100220	RTCB	0.111143	1.20769	0.497642	0.619159	0.74748	-6.39962
ENSG00000100221	JOSD1	0.0336893	3.09885	0.187787	0.851191	0.910674	-6.6727
ENSG00000100225	FBXO7	-0.0215752	1.52031	-0.144017	0.885599	0.932739	-6.58357
ENSG00000100226	GTPBP1	0.509021	5.15488	2.84954	0.00473096	0.0247458	-2.74392
ENSG00000100227	POLDIP3	0.10373	1.38417	0.719809	0.472293	0.630834	-6.33032
ENSG00000100239	PPP6R2	-0.0074592	1.50133	-0.067676	0.946096	0.969293	-6.60132
ENSG00000100241	SBF1	-0.258627	1.66535	-1.98071	0.0486839	0.131003	-4.70502
ENSG00000100242	SUN2	0.37599	5.12074	2.5156	0.0124901	0.049321	-3.60495
ENSG00000100243	CYB5R3	-0.571984	2.42466	-4.55434	8.10341e-06	0.000176874	3.17803
ENSG00000100258	LMF2	0.170737	1.50376	1.22906	0.220168	0.376572	-5.84969
ENSG00000100263	RHBDD3	-0.0292595	-0.327851	-0.143956	0.885648	0.932739	-6.29902
ENSG00000100266	PACSIN2	-0.0254944	3.89617	-0.21085	0.83317	0.899904	-6.67535
ENSG00000100280	AP1B1	-0.132745	1.95317	-1.00628	0.315221	0.479159	-6.13903
ENSG00000100281	HMGXB4	0.0189411	0.330258	0.131045	0.895842	0.939655	-6.41285
ENSG00000100284	TOM1	0.347769	5.3162	2.43634	0.0155126	0.0581841	-3.7925
ENSG00000100288	CHKB	0.0847671	2.0972	0.614235	0.5396	0.687081	-6.45828
ENSG00000100292	HMOX1	-0.563429	4.20437	-2.40603	0.0168297	0.0617716	-3.8673
ENSG00000100296	THOC5	0.11717	1.70704	0.758397	0.448904	0.61056	-6.32457
ENSG00000100297	MCM5	-0.184607	0.836377	-0.935975	0.35016	0.515705	-6.09277
ENSG00000100299	ARSA	-0.228948	1.37796	-1.67305	0.0955282	0.209976	-5.23197
ENSG00000100300	TSPO	-0.465767	4.35259	-2.3101	0.0216709	0.0735362	-4.08631
ENSG00000100304	TTLL12	-0.299631	-0.134157	-2.05465	0.040918	0.116314	-4.31676
ENSG00000100307	CBX7	-0.418167	-0.367012	-2.25168	0.0251826	0.0821669	-3.88916
ENSG00000100316	RPL3	-0.555203	4.58951	-3.16494	0.0017369	0.0116631	-1.83851
ENSG00000100319	ZMAT5	0.317162	-0.203063	1.92247	0.0556462	0.142949	-4.53376
ENSG00000100325	ASCC2	0.0750607	2.1403	0.45576	0.648945	0.770923	-6.54846
ENSG00000100330	MTMR3	0.362707	3.12637	2.57101	0.0107006	0.0443166	-3.45971
ENSG00000100335	MIEF1	-0.522285	-0.150993	-2.90062	0.00404484	0.0221577	-2.34864
ENSG00000100336	APOL4	0.584585	0.532991	2.03219	0.0431569	0.120617	-4.4026
ENSG00000100342	APOL1	0.803275	2.61482	2.99224	0.00303726	0.0177021	-2.2909
ENSG00000100345	MYH9	-0.177708	5.71354	-1.71351	0.0878185	0.197778	-5.24354
ENSG00000100348	TXN2	-0.0819328	1.06896	-0.552612	0.581007	0.718074	-6.40451
ENSG00000100353	EIF3D	-0.153702	2.50289	-1.36449	0.173602	0.317941	-5.75466
ENSG00000100354	TNRC6B	0.0603371	1.85673	0.386521	0.699429	0.809749	-6.55276
ENSG00000100359	SGSM3	-0.269697	1.19226	-1.41416	0.15852	0.29817	-5.59538
ENSG00000100360	IFT27	-1.06702	-0.546533	-4.73556	3.60503e-06	9.36358e-05	4.11428
ENSG00000100364	KIAA0930	-0.383495	2.53671	-2.43554	0.0155464	0.0582613	-3.77503
ENSG00000100365	NCF4	0.361215	4.04703	2.36596	0.0187217	0.0666774	-3.95903
ENSG00000100368	CSF2RB	0.778389	5.20043	4.869	1.95525e-06	5.76273e-05	4.5109
ENSG00000100376	FAM118A	0.162685	1.14458	0.80752	0.42011	0.583327	-6.23623
ENSG00000100379	KCTD17	-0.370534	-0.0152737	-1.74734	0.0817663	0.187605	-4.89757
ENSG00000100380	ST13	-0.229072	2.76833	-1.63484	0.1033	0.221254	-5.36904
ENSG00000100385	IL2RB	0.528619	0.400572	1.69719	0.0908652	0.202325	-4.97123
ENSG00000100387	RBX1	0.123832	0.680223	0.622237	0.534334	0.682938	-6.30431
ENSG00000100393	EP300	0.258175	3.37149	1.85495	0.064742	0.159356	-4.99919
ENSG00000100401	RANGAP1	-0.10146	0.820152	-0.613526	0.540068	0.687499	-6.33672
ENSG00000100410	PHF5A	-0.19151	0.616653	-1.08136	0.280544	0.442302	-5.90437
ENSG00000100412	ACO2	-0.568931	1.36277	-3.62443	0.00034869	0.00338511	-0.290431
ENSG00000100413	POLR3H	-0.468607	-0.319562	-2.40796	0.0167428	0.0615918	-3.56389
ENSG00000100416	TRMU	-0.486601	0.389574	-2.86063	0.00457358	0.0242713	-2.52977
ENSG00000100418	DESI1	0.00285187	0.770447	0.016326	0.986987	0.992923	-6.50742
ENSG00000100422	CERK	0.045565	1.40924	0.262895	0.792841	0.874676	-6.56104
ENSG00000100425	BRD1	0.111968	0.949286	0.778524	0.436972	0.599436	-6.24087
ENSG00000100429	HDAC10	-0.263893	0.960295	-1.89092	0.059753	0.150739	-4.81193
ENSG00000100439	ABHD4	0.0521681	0.742401	0.245686	0.80612	0.882992	-6.49504
ENSG00000100441	KHNYN	0.0360033	1.61828	0.299506	0.764795	0.855236	-6.56508
ENSG00000100445	SDR39U1	-0.0576501	-0.319794	-0.228214	0.819661	0.891179	-6.29511
ENSG00000100453	GZMB	2.47668	1.82308	5.13881	5.45647e-07	1.96035e-05	5.86249
ENSG00000100461	RBM23	-0.00919226	3.74374	-0.0627029	0.950052	0.971769	-6.69334
ENSG00000100462	PRMT5	-0.176911	1.37454	-0.965579	0.335158	0.501184	-6.12646
ENSG00000100478	AP4S1	-0.181167	0.504647	-1.09176	0.275954	0.437086	-5.90253
ENSG00000100485	SOS2	0.334099	1.84457	2.18504	0.0297841	0.0931663	-4.28114
ENSG00000100490	CDKL1	-1.33908	0.613853	-3.69496	0.000268435	0.00276794	0.00773611
ENSG00000100503	NIN	0.127599	3.17673	0.957282	0.339319	0.50564	-6.23596
ENSG00000100504	PYGL	-0.100622	3.61197	-0.4937	0.621937	0.749737	-6.57476
ENSG00000100519	PSMC6	0.0141441	2.01784	0.111368	0.911411	0.947901	-6.62983
ENSG00000100523	DDHD1	-0.13026	0.295698	-0.690657	0.490401	0.647292	-6.20754
ENSG00000100528	CNIH1	0.0432826	1.02253	0.22453	0.822523	0.893367	-6.51968
ENSG00000100554	ATP6V1D	0.17249	2.75013	1.40795	0.160348	0.300718	-5.70184
ENSG00000100564	PIGH	0.0192976	1.01891	0.127129	0.898937	0.941498	-6.53169
ENSG00000100567	PSMA3	0.329413	3.04555	2.47083	0.0141256	0.0543598	-3.69696
ENSG00000100568	VTI1B	-0.217202	0.967133	-1.39054	0.165561	0.307564	-5.60604
ENSG00000100578	KIAA0586	-0.163085	0.157805	-0.823166	0.411173	0.575268	-6.05574
ENSG00000100591	AHSA1	-0.287785	2.56147	-1.56038	0.119893	0.24537	-5.47842
ENSG00000100592	DAAM1	-0.786046	-0.00399473	-3.65606	0.000310251	0.00308351	-0.0533421
ENSG00000100596	SPTLC2	0.702438	2.37502	3.37427	0.000853773	0.00664391	-1.13607
ENSG00000100599	AL159141.1	0.0587528	3.13093	0.388591	0.697898	0.808926	-6.61459
ENSG00000100600	LGMN	0.321407	3.21482	1.37687	0.169744	0.313325	-5.74825
ENSG00000100603	SNW1	0.029334	1.79056	0.219025	0.826804	0.895768	-6.59516
ENSG00000100605	ITPK1	0.144397	2.75286	1.02351	0.307026	0.470699	-6.15842
ENSG00000100612	DHRS7	0.10342	2.60721	0.713201	0.476365	0.634208	-6.42047
ENSG00000100614	PPM1A	0.227984	2.0809	1.61336	0.107886	0.227807	-5.36204
ENSG00000100632	ERH	0.0370759	1.99496	0.189258	0.850039	0.910234	-6.61591
ENSG00000100644	HIF1A	0.430417	5.84655	2.6185	0.00935323	0.0404962	-3.34403
ENSG00000100647	SUSD6	0.64959	4.07525	4.36937	1.80589e-05	0.000337969	2.40577
ENSG00000100650	SRSF5	0.244963	4.06602	1.86	0.0640219	0.158111	-4.9986
ENSG00000100664	EIF5	0.0766236	4.02504	0.674892	0.500348	0.655936	-6.47291
ENSG00000100697	DICER1	0.225859	2.65068	1.63135	0.104036	0.221956	-5.35959
ENSG00000100711	ZFYVE21	-0.735254	-0.021852	-3.60299	0.00037725	0.00358461	-0.228656
ENSG00000100714	MTHFD1	-0.710492	0.417505	-3.46379	0.000623302	0.00522639	-0.735934
ENSG00000100722	ZC3H14	-0.00179288	0.901153	-0.00973247	0.992242	0.995986	-6.53357
ENSG00000100726	TELO2	-0.403131	0.102247	-2.29288	0.0226586	0.0760749	-3.8808
ENSG00000100731	PCNX1	0.088548	4.08853	0.624581	0.532797	0.681681	-6.50505
ENSG00000100744	GSKIP	0.385485	0.117808	1.92423	0.0554238	0.142683	-4.57573
ENSG00000100749	VRK1	-0.132799	0.554997	-0.657099	0.511702	0.664625	-6.24546
ENSG00000100764	PSMC1	-0.117722	2.61707	-0.922038	0.357369	0.523113	-6.25537
ENSG00000100767	PAPLN	0.293683	-0.206027	1.59718	0.111448	0.233276	-5.08814
ENSG00000100796	PPP4R3A	0.205281	2.20854	1.65306	0.0995337	0.215627	-5.30479
ENSG00000100802	C14orf93	0.439059	-0.116333	1.80875	0.0716517	0.171241	-4.70625
ENSG00000100804	PSMB5	-0.0774232	0.70424	-0.411421	0.681105	0.796105	-6.41862
ENSG00000100811	YY1	-0.105535	1.74588	-0.787247	0.431859	0.594326	-6.31656
ENSG00000100813	ACIN1	0.158661	3.45717	1.43049	0.153786	0.291698	-5.68545
ENSG00000100815	TRIP11	0.424906	0.328866	2.61264	0.00951071	0.0409894	-3.1008
ENSG00000100823	APEX1	-0.430751	0.733819	-2.10959	0.0358555	0.106502	-4.36835
ENSG00000100836	PABPN1	-0.0123831	2.29921	-0.104063	0.9172	0.951514	-6.65275
ENSG00000100852	ARHGAP5	-0.361842	0.109655	-1.85449	0.0648083	0.159453	-4.73438
ENSG00000100865	CINP	-0.190051	0.648012	-1.27147	0.204705	0.35729	-5.70556
ENSG00000100883	SRP54	0.55309	2.08789	3.72732	0.000237767	0.00255243	0.0475153
ENSG00000100888	CHD8	0.131277	2.01399	1.33391	0.183408	0.330792	-5.76165
ENSG00000100889	PCK2	0.162181	0.803258	0.886015	0.376433	0.541043	-6.12183
ENSG00000100890	PRORP	-0.15109	0.161258	-0.837501	0.403085	0.567302	-6.04618
ENSG00000100897	DCAF11	0.28712	2.0733	2.5183	0.012397	0.0490892	-3.54772
ENSG00000100902	PSMA6	0.0837329	3.70805	0.601473	0.548052	0.693448	-6.51623
ENSG00000100906	NFKBIA	0.795532	7.84805	4.24729	3.02159e-05	0.000512217	1.94685
ENSG00000100908	EMC9	0.511328	-0.472703	2.13241	0.0339162	0.102383	-4.0505
ENSG00000100911	PSME2	0.459272	3.63222	2.40042	0.0170841	0.0624493	-3.87339
ENSG00000100918	REC8	0.894073	2.80037	5.3636	1.81152e-07	8.05384e-06	6.79899
ENSG00000100926	TM9SF1	-0.163206	1.36843	-1.14679	0.25253	0.412736	-5.94452
ENSG00000100934	SEC23A	-0.56063	1.59512	-3.86306	0.000141631	0.00175202	0.527877
ENSG00000100938	GMPR2	0.244363	3.16499	1.8125	0.0710689	0.170162	-5.07232
ENSG00000100941	PNN	0.0494118	1.50728	0.306407	0.759541	0.852426	-6.55142
ENSG00000100949	RABGGTA	-0.00675324	1.03164	-0.0429433	0.96578	0.980016	-6.54799
ENSG00000100979	PLTP	-0.304716	0.856332	-1.1637	0.24562	0.405055	-5.88153
ENSG00000100982	PCIF1	0.0117394	1.05051	0.087515	0.93033	0.960177	-6.53877
ENSG00000100983	GSS	-0.869604	0.903065	-5.45323	1.15581e-07	5.58988e-06	7.2771
ENSG00000100985	MMP9	0.627783	3.17122	1.87394	0.0620672	0.154759	-4.95963
ENSG00000100991	TRPC4AP	0.288097	2.14567	2.28154	0.0233304	0.0776945	-4.09745
ENSG00000100994	PYGB	-0.384943	0.342974	-2.15057	0.0324379	0.0989829	-4.20998
ENSG00000100997	ABHD12	-0.296643	1.75793	-1.58242	0.114778	0.238427	-5.40414
ENSG00000101000	PROCR	-0.42157	-0.0326373	-1.49254	0.136776	0.269447	-5.31041
ENSG00000101017	CD40	0.186435	1.31024	0.91325	0.361962	0.527016	-6.15022
ENSG00000101019	UQCC1	-0.320398	0.179585	-1.59075	0.112889	0.23554	-5.19866
ENSG00000101040	ZMYND8	0.250464	0.394973	1.32362	0.1868	0.334831	-5.58695
ENSG00000101052	IFT52	0.0919188	-0.448613	0.368551	0.712765	0.818914	-6.18373
ENSG00000101084	RAB5IF	0.413277	3.73993	2.80382	0.00543323	0.0273719	-2.86627
ENSG00000101104	PABPC1L	0.0176447	1.24123	0.119107	0.905283	0.944526	-6.56861
ENSG00000101109	STK4	0.402939	3.36829	2.83637	0.00492424	0.0254191	-2.77484
ENSG00000101126	ADNP	0.191846	0.779649	1.16199	0.246311	0.40567	-5.8283
ENSG00000101138	CSTF1	0.0142757	0.511224	0.0815339	0.93508	0.963162	-6.45206
ENSG00000101146	RAE1	0.527586	0.00112795	3.2011	0.00154032	0.0106331	-1.45104
ENSG00000101150	TPD52L2	0.198417	3.5972	1.55078	0.122177	0.248803	-5.51121
ENSG00000101152	DNAJC5	0.198589	2.53723	1.49528	0.136061	0.268405	-5.56857
ENSG00000101158	NELFCD	-0.147938	1.45059	-1.32163	0.187461	0.335568	-5.74188
ENSG00000101160	CTSZ	-0.377602	5.00045	-1.94877	0.0524044	0.13775	-4.83067
ENSG00000101161	PRPF6	-0.0811626	0.902098	-0.649334	0.516699	0.668978	-6.32463
ENSG00000101166	PRELID3B	-0.0631182	1.15279	-0.422702	0.672865	0.789755	-6.4741
ENSG00000101181	MTG2	-0.117418	1.07276	-0.791213	0.429546	0.592468	-6.25815
ENSG00000101182	PSMA7	-0.319485	3.58858	-2.15256	0.0322791	0.0986131	-4.42571
ENSG00000101187	SLCO4A1	0.982572	2.45934	3.82379	0.000164775	0.00195427	0.378457
ENSG00000101191	DIDO1	0.0528252	0.838563	0.474194	0.635762	0.761012	-6.40591
ENSG00000101193	GID8	-0.154558	0.0518915	-0.823185	0.411162	0.575268	-6.0703
ENSG00000101199	ARFGAP1	-0.16884	1.8525	-1.3002	0.19469	0.345161	-5.80621
ENSG00000101224	CDC25B	0.243831	-0.207766	1.0779	0.282082	0.443935	-5.72464
ENSG00000101236	RNF24	0.766239	2.74269	4.14504	4.60928e-05	0.000728311	1.55253
ENSG00000101246	ARFRP1	0.0997244	1.13665	0.627437	0.530927	0.680172	-6.35839
ENSG00000101255	TRIB3	0.23066	0.563067	1.0612	0.289588	0.451132	-5.91375
ENSG00000101265	RASSF2	0.712595	3.53587	3.70931	0.000254398	0.00267553	-0.0653602
ENSG00000101266	CSNK2A1	-0.499463	1.66419	-3.69184	0.000271582	0.00279528	-0.0808467
ENSG00000101290	CDS2	0.418726	2.05598	2.69935	0.00740577	0.0342334	-3.07397
ENSG00000101294	HM13	0.293802	3.98837	2.14291	0.0330548	0.100404	-4.44566
ENSG00000101307	SIRPB1	0.0676069	3.86607	0.331458	0.740567	0.839105	-6.64242
ENSG00000101310	SEC23B	-0.0050503	1.88083	-0.0382979	0.96948	0.982046	-6.63398
ENSG00000101336	HCK	0.404288	5.28271	2.86382	0.00452915	0.0241391	-2.70364
ENSG00000101337	TM9SF4	0.0278863	1.95535	0.182688	0.855186	0.913857	-6.62428
ENSG00000101342	TLDC2	1.26017	-0.192583	3.47894	0.000590595	0.0050076	-0.480435
ENSG00000101343	CRNKL1	0.457251	0.119391	2.49158	0.0133452	0.0518915	-3.34196
ENSG00000101347	SAMHD1	0.142009	4.31882	0.712777	0.476627	0.634385	-6.44649
ENSG00000101350	KIF3B	0.00514373	0.235652	0.0376288	0.970013	0.982046	-6.41904
ENSG00000101361	NOP56	-0.102096	1.62869	-0.586565	0.558008	0.700731	-6.4386
ENSG00000101363	MANBAL	-0.0294168	0.0555203	-0.180995	0.856513	0.914283	-6.36207
ENSG00000101365	IDH3B	0.0519458	0.973187	0.329173	0.742291	0.840575	-6.48351
ENSG00000101367	MAPRE1	-0.026214	2.88636	-0.206034	0.836927	0.902278	-6.66161
ENSG00000101384	JAG1	0.401416	0.631149	2.34757	0.0196512	0.0686466	-3.80221
ENSG00000101413	RPRD1B	0.0993527	1.11737	0.659383	0.510237	0.663648	-6.34608
ENSG00000101421	CHMP4B	0.396019	3.84146	3.01054	0.00286597	0.0169547	-2.29288
ENSG00000101425	BPI	0.126713	-0.260107	0.501793	0.616241	0.744968	-6.19583
ENSG00000101439	CST3	-0.500817	4.96611	-2.36576	0.0187318	0.0666893	-3.95733
ENSG00000101443	WFDC2	-0.260722	3.09206	-0.562328	0.57438	0.713643	-6.53468
ENSG00000101444	AHCY	-0.408711	0.399359	-2.47475	0.0139753	0.0539467	-3.51394
ENSG00000101445	PPP1R16B	0.293575	-0.556914	1.02166	0.307895	0.471592	-5.69082
ENSG00000101457	DNTTIP1	0.257214	2.17453	1.56523	0.118753	0.243796	-5.44196
ENSG00000101460	MAP1LC3A	0.0554564	1.62387	0.253456	0.800117	0.879254	-6.58605
ENSG00000101473	ACOT8	0.120404	-0.0789743	0.668118	0.504655	0.659912	-6.13691
ENSG00000101474	APMAP	-0.0516502	2.19523	-0.284307	0.776403	0.86302	-6.61317
ENSG00000101493	ZNF516	0.17152	1.93492	1.00367	0.316478	0.480476	-6.13503
ENSG00000101544	ADNP2	0.462611	1.23511	1.92618	0.0551785	0.142365	-4.74356
ENSG00000101557	USP14	-0.328308	0.373144	-2.10829	0.0359687	0.106746	-4.29098
ENSG00000101558	VAPA	-0.297271	4.00442	-2.30726	0.0218309	0.0738958	-4.0931
ENSG00000101577	LPIN2	0.121989	2.22866	0.708433	0.479315	0.636869	-6.40221
ENSG00000101596	SMCHD1	0.839771	4.88701	4.41539	1.48308e-05	0.000286826	2.59108
ENSG00000101608	MYL12A	0.319196	5.671	2.6668	0.0081409	0.0366266	-3.22394
ENSG00000101654	RNMT	0.245099	0.621811	1.29916	0.195046	0.345454	-5.64938
ENSG00000101665	SMAD7	0.107881	0.908934	0.665688	0.506204	0.661148	-6.31294
ENSG00000101745	ANKRD12	0.618906	3.59573	4.40246	1.56767e-05	0.000297918	2.54256
ENSG00000101751	POLI	0.182425	0.251873	0.858887	0.391199	0.555685	-6.04472
ENSG00000101773	RBBP8	0.0830911	0.548639	0.415023	0.67847	0.794282	-6.36104
ENSG00000101782	RIOK3	-0.0983151	2.51683	-0.760977	0.447365	0.609362	-6.38498
ENSG00000101843	PSMD10	-0.374464	0.743264	-1.95555	0.0515958	0.136205	-4.65618
ENSG00000101849	TBL1X	-0.00320039	1.93683	-0.0207337	0.983474	0.990214	-6.64052
ENSG00000101856	PGRMC1	-0.33794	-0.0216504	-1.72281	0.0861198	0.195157	-4.93285
ENSG00000101882	NKAP	0.0863439	0.307162	0.520727	0.603003	0.734285	-6.28204
ENSG00000101901	ALG13	0.351206	1.58569	1.58653	0.113842	0.236876	-5.35672
ENSG00000101911	PRPS2	-0.0673145	0.171256	-0.315568	0.752585	0.847648	-6.34337
ENSG00000101916	TLR8	0.868556	2.20807	3.60915	0.000368821	0.00352492	-0.33942
ENSG00000101940	WDR13	-0.268696	2.03721	-1.68023	0.0941206	0.207415	-5.26599
ENSG00000101966	XIAP	0.507657	2.09923	2.7697	0.00601773	0.0295749	-2.89655
ENSG00000101972	STAG2	0.409122	3.19435	2.77615	0.00590292	0.0291562	-2.93374
ENSG00000101974	ATP11C	0.602524	0.264588	3.01148	0.00285747	0.0169247	-2.00907
ENSG00000101986	ABCD1	0.449865	1.06973	2.72213	0.00692754	0.0326134	-2.92611
ENSG00000102007	PLP2	0.133266	3.62486	0.721955	0.470975	0.629672	-6.43565
ENSG00000102030	NAA10	0.0753322	1.73781	0.51192	0.609144	0.739294	-6.48964
ENSG00000102032	RENBP	0.45228	2.88982	2.49855	0.0130921	0.0510814	-3.63018
ENSG00000102034	ELF4	0.542081	2.35436	3.78099	0.000194067	0.00221434	0.223061
ENSG00000102054	RBBP7	0.00789038	0.869502	0.0469269	0.962608	0.978512	-6.5177
ENSG00000102081	FMR1	0.268256	2.9432	1.77564	0.0769685	0.180299	-5.12894
ENSG00000102096	PIM2	0.9046	3.06435	4.28123	2.62173e-05	0.000460041	2.07266
ENSG00000102100	SLC35A2	0.242476	0.797566	1.21752	0.224517	0.381519	-5.77713
ENSG00000102103	PQBP1	0.106161	1.29926	0.647665	0.517777	0.669688	-6.36718
ENSG00000102119	EMD	-0.0281238	2.30557	-0.156285	0.875931	0.926405	-6.65597
ENSG00000102125	TAZ	-0.243679	0.855611	-1.66577	0.0969704	0.211987	-5.17778
ENSG00000102144	PGK1	0.0426913	4.39266	0.336084	0.73708	0.836502	-6.6424
ENSG00000102158	MAGT1	-0.0932031	1.42591	-0.727633	0.467497	0.627152	-6.33714
ENSG00000102172	SMS	-0.336346	1.50268	-2.32949	0.0206038	0.070868	-3.96391
ENSG00000102181	CD99L2	-0.327463	0.321265	-2.27471	0.023743	0.0786445	-3.95472
ENSG00000102189	EEA1	-0.137566	0.101053	-0.831616	0.406394	0.570609	-6.06789
ENSG00000102218	RP2	0.508249	1.95367	3.37048	0.000865098	0.00670059	-1.12955
ENSG00000102225	CDK16	-0.0428143	1.85793	-0.30032	0.764174	0.854828	-6.59018
ENSG00000102226	USP11	-0.161861	1.03945	-1.0313	0.303363	0.466633	-6.04117
ENSG00000102265	TIMP1	-0.213201	6.78251	-1.00095	0.317786	0.481686	-6.17778
ENSG00000102316	MAGED2	-0.24457	1.00753	-1.24314	0.214941	0.369847	-5.78659
ENSG00000102317	RBM3	-0.0129066	2.53999	-0.0724591	0.942293	0.967553	-6.66932
ENSG00000102390	PBDC1	-0.278237	-0.0768286	-1.32986	0.184738	0.33228	-5.49624
ENSG00000102393	GLA	0.635564	2.98966	3.26315	0.00125027	0.00901664	-1.52192
ENSG00000102401	ARMCX3	0.0682149	1.53526	0.476929	0.633816	0.759591	-6.48747
ENSG00000102445	RUBCNL	-0.425778	2.6847	-1.64906	0.10035	0.216917	-5.34322
ENSG00000102524	TNFSF13B	1.14163	3.96662	4.68966	4.43617e-06	0.000108759	3.74196
ENSG00000102531	FNDC3A	0.435084	2.38996	3.14549	0.00185203	0.0122441	-1.86068
ENSG00000102543	CDADC1	0.790086	0.555788	3.50511	0.000537854	0.00466488	-0.533447
ENSG00000102547	CAB39L	-0.156588	-0.290825	-0.631347	0.528372	0.678431	-6.09727
ENSG00000102554	KLF5	-0.311639	1.4351	-1.10774	0.269004	0.430518	-6.00196
ENSG00000102572	STK24	-0.046291	2.93135	-0.350238	0.726446	0.828348	-6.62058
ENSG00000102575	ACP5	-1.18353	2.64385	-4.4124	1.50222e-05	0.000288826	2.58711
ENSG00000102580	DNAJC3	0.175134	2.12754	1.15731	0.248213	0.408161	-5.98811
ENSG00000102595	UGGT2	-0.440185	0.0354669	-1.92255	0.0556357	0.142949	-4.61791
ENSG00000102606	ARHGEF7	-0.146125	1.4995	-1.13714	0.256532	0.416651	-5.9711
ENSG00000102699	PARP4	0.269904	2.36262	1.60594	0.109509	0.230295	-5.37969
ENSG00000102710	SUPT20H	-0.00154523	1.74678	-0.0102123	0.99186	0.995805	-6.616
ENSG00000102755	FLT1	0.253138	0.907426	1.34008	0.181396	0.328427	-5.64953
ENSG00000102760	RGCC	-0.450819	3.03408	-1.72103	0.0864418	0.195617	-5.23524
ENSG00000102786	INTS6	0.0941044	2.30214	0.728441	0.467003	0.626735	-6.39768
ENSG00000102794	ACOD1	2.39989	1.76954	4.64239	5.48376e-06	0.00012792	3.69269
ENSG00000102796	DHRS12	0.0413579	0.832092	0.187277	0.85159	0.910805	-6.50414
ENSG00000102804	TSC22D1	-0.31859	1.25384	-1.60423	0.109884	0.230886	-5.33073
ENSG00000102805	CLN5	-0.274623	1.76351	-1.39593	0.163933	0.305636	-5.67693
ENSG00000102854	MSLN	-1.04883	-0.146513	-3.57117	0.000423717	0.00388176	-0.330348
ENSG00000102858	MGRN1	-0.145325	3.1273	-1.16651	0.244483	0.403875	-6.01853
ENSG00000102871	TRADD	0.0190344	0.882041	0.127476	0.898663	0.941311	-6.52055
ENSG00000102879	CORO1A	0.366304	5.21994	2.32678	0.0207503	0.071272	-4.04647
ENSG00000102882	MAPK3	-0.149594	2.38565	-1.05525	0.292295	0.454342	-6.11854
ENSG00000102886	GDPD3	-0.339322	-0.482045	-1.54456	0.123677	0.250767	-5.14535
ENSG00000102893	PHKB	-0.0331352	1.62102	-0.244661	0.806913	0.883664	-6.58442
ENSG00000102897	LYRM1	0.777579	2.32807	4.97586	1.18683e-06	3.75664e-05	5.02215
ENSG00000102898	NUTF2	-0.398594	1.09639	-2.22686	0.0268186	0.0859662	-4.1626
ENSG00000102900	NUP93	-0.566142	1.02064	-3.47623	0.000596331	0.00504754	-0.7504
ENSG00000102901	CENPT	-0.28828	0.177541	-1.62203	0.106016	0.225308	-5.14653
ENSG00000102908	NFAT5	0.154836	2.14701	1.32148	0.187509	0.335568	-5.78713
ENSG00000102910	LONP2	-0.233178	0.386509	-1.74788	0.0816716	0.187451	-4.97581
ENSG00000102921	N4BP1	0.717187	4.25309	3.86369	0.000141286	0.00175166	0.476349
ENSG00000102931	ARL2BP	-0.434908	0.186891	-1.77097	0.0777447	0.181312	-4.92001
ENSG00000102974	CTCF	-0.116589	0.767999	-1.09001	0.276724	0.437884	-5.92644
ENSG00000102978	POLR2C	-0.131823	1.02877	-0.949138	0.343437	0.509067	-6.10683
ENSG00000103005	USB1	0.209048	3.39644	1.62331	0.105743	0.224872	-5.3956
ENSG00000103018	CYB5B	-0.0509596	0.581839	-0.296269	0.767262	0.857119	-6.42731
ENSG00000103035	PSMD7	0.00932877	1.96056	0.0755922	0.939802	0.966407	-6.63016
ENSG00000103042	SLC38A7	0.18332	0.436252	0.967536	0.334181	0.500027	-5.9893
ENSG00000103043	VAC14	-0.102949	1.72346	-0.668978	0.504106	0.659371	-6.40928
ENSG00000103047	TANGO6	-0.704949	0.233971	-2.96917	0.0032666	0.0187065	-2.20123
ENSG00000103051	COG4	0.0846191	0.41645	0.5021	0.616025	0.744799	-6.31411
ENSG00000103056	SMPD3	-0.67562	-0.403788	-2.70794	0.00722206	0.0335507	-2.80702
ENSG00000103064	SLC7A6	-0.334657	0.532323	-1.72455	0.0858034	0.19453	-5.03254
ENSG00000103066	PLA2G15	-1.08155	0.679689	-5.53032	7.81868e-08	4.0509e-06	7.65039
ENSG00000103091	WDR59	-0.21742	1.09671	-1.06715	0.2869	0.448578	-6.01492
ENSG00000103111	MON1B	-0.0318267	2.00953	-0.251648	0.801513	0.880401	-6.61802
ENSG00000103121	CMC2	0.326471	1.65703	1.6278	0.104785	0.22327	-5.29283
ENSG00000103126	AXIN1	-0.0527208	0.572385	-0.408597	0.683174	0.797494	-6.40383
ENSG00000103145	HCFC1R1	-0.185572	0.170282	-0.92255	0.357102	0.522801	-6.00457
ENSG00000103152	MPG	-0.134324	0.0548333	-0.691931	0.489602	0.646584	-6.14627
ENSG00000103160	HSDL1	0.177366	0.614208	0.879429	0.379986	0.543847	-6.07732
ENSG00000103168	TAF1C	0.0986137	1.64985	0.372591	0.709759	0.816604	-6.51918
ENSG00000103174	NAGPA	-0.581447	0.25695	-3.08812	0.00223391	0.0141146	-1.87826
ENSG00000103187	COTL1	-0.0719643	5.2998	-0.568183	0.570404	0.709778	-6.53317
ENSG00000103194	USP10	-0.0886685	3.26478	-0.551452	0.5818	0.718871	-6.54124
ENSG00000103196	CRISPLD2	0.372118	2.10653	2.09835	0.0368455	0.108533	-4.48154
ENSG00000103197	TSC2	-0.226674	2.40785	-1.49938	0.134996	0.2669	-5.56403
ENSG00000103222	ABCC1	0.177624	1.59958	1.26385	0.207422	0.360918	-5.81656
ENSG00000103226	NOMO3	-0.396771	1.19623	-1.68909	0.0924088	0.204375	-5.19157
ENSG00000103245	CIAO3	-0.425887	-0.075276	-2.1919	0.0292792	0.0918559	-4.06481
ENSG00000103248	MTHFSD	-0.354799	0.131966	-1.783	0.0757604	0.17846	-4.87072
ENSG00000103249	CLCN7	0.583961	3.97719	2.73644	0.00664161	0.0315845	-3.04666
ENSG00000103254	ANTKMT	-0.602839	-0.481541	-2.59228	0.0100769	0.0426852	-3.09961
ENSG00000103257	SLC7A5	0.795049	3.17497	4.25518	2.92368e-05	0.000501447	1.9651
ENSG00000103264	FBXO31	-1.01027	-0.423027	-4.55262	8.16492e-06	0.000177429	3.34415
ENSG00000103266	STUB1	-0.401826	1.09801	-1.95413	0.0517646	0.136468	-4.71706
ENSG00000103274	NUBP1	-0.111657	0.601377	-0.570213	0.569028	0.708908	-6.33291
ENSG00000103275	UBE2I	0.152241	2.07339	1.09734	0.273512	0.434553	-6.04978
ENSG00000103313	MEFV	0.863106	3.90323	5.01795	9.72736e-07	3.25701e-05	5.17822
ENSG00000103326	CAPN15	-0.20698	1.44533	-1.22551	0.221499	0.378088	-5.87205
ENSG00000103335	PIEZO1	-0.152489	1.58419	-0.867337	0.386562	0.550538	-6.24718
ENSG00000103342	GSPT1	-0.216757	1.68448	-1.43317	0.153017	0.290771	-5.61676
ENSG00000103351	CLUAP1	-0.986699	-0.323864	-4.0042	8.13779e-05	0.00115012	1.2185
ENSG00000103353	UBFD1	-0.275911	0.658681	-1.37286	0.170985	0.314671	-5.57383
ENSG00000103363	ELOB	-0.491405	3.04387	-2.77914	0.00585048	0.0290137	-2.92683
ENSG00000103365	GGA2	-0.616265	1.94706	-3.52791	0.000495556	0.0043517	-0.654265
ENSG00000103381	CPPED1	0.177162	2.20136	0.986131	0.324991	0.489561	-6.16467
ENSG00000103415	HMOX2	-0.819072	0.848603	-5.24842	3.20117e-07	1.29149e-05	6.30377
ENSG00000103423	DNAJA3	-0.575255	0.232912	-2.75399	0.00630532	0.0304956	-2.79582
ENSG00000103429	BFAR	0.168293	1.29059	1.3119	0.190719	0.339931	-5.72559
ENSG00000103479	RBL2	-0.0256299	1.75305	-0.217615	0.827901	0.896011	-6.60054
ENSG00000103490	PYCARD	-0.17207	3.02606	-0.976025	0.329965	0.494847	-6.21557
ENSG00000103495	MAZ	-0.293364	2.08137	-1.74035	0.0829873	0.189851	-5.16818
ENSG00000103496	STX4	0.30968	4.11216	2.06057	0.0403446	0.115305	-4.61559
ENSG00000103502	CDIPT	0.164263	1.24062	1.13429	0.257725	0.418034	-5.92544
ENSG00000103507	BCKDK	0.0334288	1.97442	0.248174	0.804197	0.88167	-6.61481
ENSG00000103510	KAT8	-0.194385	1.80753	-1.49539	0.136033	0.268405	-5.53905
ENSG00000103512	NOMO1	-0.262531	0.631055	-1.34328	0.180361	0.327336	-5.60476
ENSG00000103534	TMC5	-1.30726	0.298284	-4.48794	1.08363e-05	0.000227932	3.02116
ENSG00000103544	VPS35L	-0.327391	1.45978	-2.00878	0.0456009	0.125041	-4.62467
ENSG00000103549	RNF40	-0.0696673	2.3175	-0.549789	0.582939	0.719631	-6.51469
ENSG00000103569	AQP9	0.523958	7.04387	3.13577	0.00191216	0.0125072	-1.90555
ENSG00000103591	AAGAB	0.237496	0.802206	1.41997	0.156822	0.295682	-5.50672
ENSG00000103642	LACTB	0.665253	2.61464	3.86263	0.000141863	0.00175202	0.507392
ENSG00000103653	CSK	0.250805	3.64122	1.83155	0.0681691	0.164984	-5.04644
ENSG00000103657	HERC1	-0.0880071	2.03948	-0.682857	0.495309	0.65181	-6.41245
ENSG00000103671	TRIP4	0.160291	1.02268	1.06854	0.286276	0.448072	-5.96291
ENSG00000103723	AP3B2	-0.293663	0.535955	-1.17154	0.242461	0.402352	-5.79725
ENSG00000103769	RAB11A	0.123099	3.29448	0.882015	0.378588	0.542715	-6.30298
ENSG00000103811	CTSH	-0.23261	4.12687	-1.34346	0.180301	0.327287	-5.80883
ENSG00000103855	CD276	-1.29577	0.894112	-6.29325	1.32368e-09	1.67535e-07	11.538
ENSG00000103876	FAH	-0.709614	-0.153256	-3.18583	0.00162069	0.0110028	-1.54657
ENSG00000103888	CEMIP	0.790679	0.441349	2.53913	0.0117	0.0470482	-3.26887
ENSG00000103932	RPAP1	-0.542749	-0.158537	-2.42085	0.016174	0.0599461	-3.55894
ENSG00000103942	HOMER2	-1.00277	-0.567169	-4.54823	8.32421e-06	0.000180096	3.34056
ENSG00000103966	EHD4	-0.239511	1.05288	-1.70507	0.0893822	0.2002	-5.13502
ENSG00000103978	TMEM87A	0.00475571	1.27336	0.0374873	0.970125	0.982046	-6.57251
ENSG00000103994	ZNF106	-0.146778	2.32983	-1.1453	0.253144	0.412985	-6.01728
ENSG00000103995	CEP152	-0.272929	-0.379463	-1.13138	0.258944	0.41932	-5.6876
ENSG00000104043	ATP8B4	0.619417	1.29087	2.9979	0.00298333	0.0174896	-2.19161
ENSG00000104047	DTWD1	0.120935	0.917404	0.596528	0.551345	0.696004	-6.35267
ENSG00000104064	GABPB1	0.329879	1.09678	1.88017	0.0612101	0.153477	-4.81317
ENSG00000104067	TJP1	-1.03848	-0.289178	-5.03133	9.12875e-07	3.10946e-05	5.38841
ENSG00000104081	BMF	0.0393659	0.485836	0.188589	0.850563	0.910498	-6.44347
ENSG00000104093	DMXL2	0.74619	3.84163	4.03057	7.32493e-05	0.00105573	1.09224
ENSG00000104129	DNAJC17	-0.0157637	0.202089	-0.0665981	0.946953	0.969406	-6.4173
ENSG00000104131	EIF3J	0.151612	1.85447	1.00927	0.313788	0.477645	-6.12698
ENSG00000104133	SPG11	0.10957	3.30944	0.899025	0.369476	0.534164	-6.28901
ENSG00000104142	VPS18	0.29785	1.44311	1.95035	0.0522159	0.1374	-4.72869
ENSG00000104154	SLC30A4	0.684104	0.682488	3.34096	0.000958211	0.00726755	-1.10107
ENSG00000104164	BLOC1S6	-0.139233	3.4399	-0.560951	0.575317	0.714447	-6.5386
ENSG00000104177	MYEF2	-0.28757	0.480991	-1.06663	0.287133	0.448866	-5.89318
ENSG00000104205	SGK3	0.171673	2.23441	1.00702	0.314866	0.478915	-6.14866
ENSG00000104219	ZDHHC2	0.18125	0.647968	0.802543	0.422977	0.586283	-6.16261
ENSG00000104228	TRIM35	-0.247132	-0.559464	-1.17082	0.24275	0.402429	-5.64104
ENSG00000104267	CA2	-0.28764	-0.207682	-1.1617	0.24643	0.405798	-5.70621
ENSG00000104299	INTS9	-0.217622	0.288784	-1.18504	0.237091	0.397196	-5.75507
ENSG00000104312	RIPK2	0.566053	3.1986	2.8879	0.00420659	0.0228404	-2.6263
ENSG00000104320	NBN	1.51299	4.53673	7.14091	9.39738e-12	3.42622e-09	16.2818
ENSG00000104324	CPQ	-0.186051	2.57432	-1.14331	0.25397	0.413852	-6.03087
ENSG00000104325	DECR1	0.0915193	2.97192	0.568891	0.569924	0.709548	-6.52155
ENSG00000104331	IMPAD1	-0.155657	0.447642	-0.815021	0.415811	0.579105	-6.15698
ENSG00000104343	UBE2W	0.302251	1.9548	2.01425	0.0450192	0.123756	-4.639
ENSG00000104365	IKBKB	0.265034	2.77356	2.15247	0.0322867	0.0986131	-4.4058
ENSG00000104375	STK3	-0.00657161	1.86572	-0.0381609	0.969589	0.982046	-6.62042
ENSG00000104388	RAB2A	0.104875	2.84322	0.755028	0.45092	0.61223	-6.39776
ENSG00000104408	EIF3E	-0.251915	2.41622	-1.44878	0.148613	0.285063	-5.6364
ENSG00000104412	EMC2	0.215374	1.86284	1.13336	0.258112	0.418386	-5.98782
ENSG00000104419	NDRG1	0.0261984	4.44095	0.156734	0.875577	0.926295	-6.68553
ENSG00000104432	IL7	0.320566	-0.0305191	1.18026	0.238981	0.399072	-5.65918
ENSG00000104447	TRPS1	0.189773	1.67066	1.25863	0.209301	0.362974	-5.83081
ENSG00000104450	SPAG1	-0.339061	0.0604942	-1.52527	0.128415	0.257901	-5.26855
ENSG00000104472	CHRAC1	0.0681826	0.347339	0.381022	0.7035	0.812061	-6.34534
ENSG00000104490	NCALD	-1.01616	-0.153753	-3.432	0.000697486	0.00572171	-0.770924
ENSG00000104497	SNX16	0.515591	0.103059	2.78754	0.00570532	0.028437	-2.63471
ENSG00000104517	UBR5	0.0356417	2.042	0.29862	0.76547	0.855602	-6.60044
ENSG00000104518	GSDMD	0.295299	2.82814	2.05657	0.040732	0.116036	-4.59873
ENSG00000104522	TSTA3	-0.0793824	0.93578	-0.465769	0.641773	0.76503	-6.43977
ENSG00000104529	EEF1D	-0.0376884	4.89507	-0.339309	0.734653	0.834902	-6.63859
ENSG00000104549	SQLE	-0.319479	0.274998	-1.6553	0.0990769	0.214969	-5.09796
ENSG00000104611	SH2D4A	-0.42944	-0.121907	-1.87858	0.061428	0.153828	-4.66484
ENSG00000104613	INTS10	-0.23991	1.60806	-1.49023	0.137382	0.270235	-5.5249
ENSG00000104626	ERI1	0.222091	1.87841	1.10361	0.270789	0.432173	-6.01835
ENSG00000104660	LEPROTL1	-0.0709282	1.66652	-0.414172	0.679092	0.794695	-6.52306
ENSG00000104671	DCTN6	-0.289199	0.630346	-1.66148	0.0978299	0.213109	-5.14778
ENSG00000104687	GSR	-0.0639993	1.84313	-0.44214	0.658758	0.778758	-6.5402
ENSG00000104689	TNFRSF10A	0.084607	0.833763	0.478353	0.632803	0.758739	-6.391
ENSG00000104695	PPP2CB	-0.234847	1.95245	-1.6319	0.103918	0.221927	-5.33892
ENSG00000104714	ERICH1	0.0401319	2.78688	0.223999	0.822935	0.893367	-6.65399
ENSG00000104731	KLHDC4	-0.480015	0.622128	-2.17856	0.030268	0.0942106	-4.2072
ENSG00000104738	MCM4	-0.393575	0.637418	-1.53555	0.125873	0.254174	-5.34285
ENSG00000104756	KCTD9	-0.0691146	0.800262	-0.35831	0.720404	0.824419	-6.45208
ENSG00000104763	ASAH1	0.0762345	5.13449	0.490351	0.624302	0.751523	-6.57599
ENSG00000104765	BNIP3L	0.196598	2.30512	1.19893	0.231652	0.39001	-5.9421
ENSG00000104774	MAN2B1	-0.263329	3.26968	-1.85905	0.0641563	0.158364	-4.99615
ENSG00000104783	KCNN4	0.387398	1.41698	2.00216	0.0463123	0.126533	-4.62149
ENSG00000104804	TULP2	1.32233	1.40717	3.17955	0.00165485	0.0112115	-1.64994
ENSG00000104805	NUCB1	-0.0680112	4.26772	-0.441784	0.659015	0.778886	-6.60175
ENSG00000104812	GYS1	0.143402	1.34764	0.886787	0.376018	0.540684	-6.20103
ENSG00000104814	MAP4K1	-0.476699	0.307153	-1.71195	0.0881055	0.198146	-5.01052
ENSG00000104823	ECH1	-0.690098	2.02367	-3.85162	0.000148035	0.00179961	0.461731
ENSG00000104824	HNRNPL	-0.104758	3.27789	-0.947439	0.3443	0.509515	-6.24888
ENSG00000104825	NFKBIB	0.413896	1.69054	2.89257	0.00414657	0.0225893	-2.54966
ENSG00000104852	SNRNP70	-0.0808422	2.58879	-0.515184	0.606865	0.737772	-6.54391
ENSG00000104853	CLPTM1	-0.31553	2.00809	-2.85701	0.00462439	0.024435	-2.68184
ENSG00000104856	RELB	0.602581	3.17785	4.03744	7.12621e-05	0.0010362	1.12533
ENSG00000104859	CLASRP	0.109064	2.52671	0.818825	0.413641	0.576917	-6.33415
ENSG00000104866	PPP1R37	-0.323085	0.103185	-1.55605	0.12092	0.246906	-5.24516
ENSG00000104870	FCGRT	-0.464121	3.59175	-3.18399	0.00163064	0.0110628	-1.78117
ENSG00000104872	PIH1D1	-0.0457846	0.828064	-0.223653	0.823204	0.893367	-6.49898
ENSG00000104880	ARHGEF18	-0.0297284	0.622965	-0.191262	0.848471	0.909247	-6.47093
ENSG00000104885	DOT1L	0.0116395	2.8615	0.0687801	0.945218	0.968913	-6.68127
ENSG00000104886	PLEKHJ1	0.25928	1.34691	1.79515	0.0737974	0.175107	-5.01079
ENSG00000104894	CD37	0.41953	4.868	2.825	0.00509686	0.0260619	-2.81205
ENSG00000104897	SF3A2	-0.013798	1.23482	-0.0919399	0.926817	0.958152	-6.57747
ENSG00000104903	LYL1	0.0747363	1.07303	0.442044	0.658827	0.778758	-6.44409
ENSG00000104904	OAZ1	-0.148998	6.47555	-1.47056	0.142627	0.276962	-5.61169
ENSG00000104907	TRMT1	-0.360558	0.122283	-1.64153	0.101903	0.219517	-5.12741
ENSG00000104915	STX10	0.171653	2.00654	1.09126	0.276173	0.437362	-6.04772
ENSG00000104918	RETN	0.031822	2.37989	0.0911242	0.927464	0.958213	-6.65905
ENSG00000104936	DMPK	-0.866519	-0.411389	-3.67313	0.000291196	0.00292803	0.0423937
ENSG00000104946	TBC1D17	0.533633	1.54021	3.29381	0.00112652	0.00832543	-1.33597
ENSG00000104951	IL4I1	1.34425	2.27981	4.99455	1.08667e-06	3.50833e-05	5.13029
ENSG00000104957	CCDC130	0.00592741	1.10386	0.0436566	0.965212	0.979987	-6.56334
ENSG00000104960	PTOV1	-0.542023	1.9257	-3.89831	0.000123504	0.00156672	0.635145
ENSG00000104964	TLE5	-0.739794	3.17717	-3.65668	0.000309538	0.00308098	-0.248707
ENSG00000104969	SGTA	-0.0491473	1.60375	-0.385626	0.700091	0.809987	-6.53969
ENSG00000104972	LILRB1	0.578773	3.45202	2.58814	0.0101957	0.0430757	-3.41589
ENSG00000104973	MED25	-0.080595	2.2461	-0.623675	0.533391	0.682264	-6.46542
ENSG00000104974	LILRA1	0.63336	1.33866	2.7857	0.00573692	0.0285656	-2.76336
ENSG00000104976	SNAPC2	-0.105533	-0.103238	-0.518866	0.604298	0.735498	-6.25042
ENSG00000104979	C19orf53	-0.305778	1.55302	-1.81985	0.0699384	0.16829	-4.99258
ENSG00000104980	TIMM44	-0.521626	0.458461	-2.71403	0.00709424	0.0330818	-2.93151
ENSG00000104983	CCDC61	-0.674035	-0.624975	-2.83249	0.00498256	0.0256261	-2.48129
ENSG00000104998	IL27RA	0.327955	-0.190571	2.15818	0.0318348	0.0976554	-4.06065
ENSG00000105053	VRK3	0.0886851	2.25873	0.832605	0.405836	0.570314	-6.31146
ENSG00000105058	FAM32A	0.0299739	1.80493	0.220994	0.825272	0.894711	-6.59739
ENSG00000105063	PPP6R1	-0.100785	2.56357	-0.85221	0.394887	0.559077	-6.31427
ENSG00000105085	MED26	-0.169961	-0.10401	-0.926365	0.355121	0.520985	-5.94255
ENSG00000105122	RASAL3	0.53806	1.61948	2.77034	0.00600609	0.0295325	-2.86799
ENSG00000105127	AKAP8	-0.0276183	0.477384	-0.189332	0.849981	0.910234	-6.45908
ENSG00000105135	ILVBL	-0.517152	-0.144793	-2.4405	0.0153394	0.0576999	-3.51194
ENSG00000105171	POP4	0.135518	1.00863	0.718526	0.473082	0.631118	-6.27564
ENSG00000105176	URI1	-0.11833	0.665619	-0.62263	0.534077	0.682786	-6.31154
ENSG00000105185	PDCD5	-0.51252	0.714645	-2.20386	0.028416	0.0897423	-4.15615
ENSG00000105186	ANKRD27	-0.161069	0.484208	-1.06351	0.288545	0.45022	-5.91054
ENSG00000105193	RPS16	-0.289019	5.14311	-1.75541	0.0803736	0.185379	-5.17918
ENSG00000105197	TIMM50	-0.959132	1.14153	-5.61037	5.18809e-08	2.98664e-06	8.02549
ENSG00000105202	FBL	-0.393835	1.33441	-2.07692	0.0387973	0.112346	-4.4918
ENSG00000105220	GPI	-0.47446	2.81813	-2.98394	0.00311805	0.018066	-2.36048
ENSG00000105221	AKT2	0.0173974	2.84784	0.147604	0.88277	0.931603	-6.66786
ENSG00000105223	PLD3	-0.791971	2.78122	-4.42464	1.4252e-05	0.000279476	2.63679
ENSG00000105229	PIAS4	0.184544	1.19981	1.03775	0.300355	0.463332	-6.037
ENSG00000105245	NUMBL	-0.769194	-0.319464	-3.59764	0.000384712	0.00363446	-0.208411
ENSG00000105246	EBI3	1.38574	0.14666	4.05235	6.71233e-05	0.000989165	1.42636
ENSG00000105248	YJU2	0.291349	-0.23178	1.56112	0.119719	0.245197	-5.1022
ENSG00000105254	TBCB	-0.219591	2.05373	-1.63395	0.103487	0.221383	-5.34001
ENSG00000105258	POLR2I	-0.808344	0.489136	-2.77155	0.00598464	0.0294564	-2.78717
ENSG00000105281	SLC1A5	-0.372878	0.713854	-2.10932	0.0358791	0.106512	-4.3543
ENSG00000105287	PRKD2	0.474226	3.08995	2.77726	0.00588338	0.0291181	-2.92415
ENSG00000105289	TJP3	-0.821638	0.0183759	-3.06006	0.00244594	0.0151737	-1.93392
ENSG00000105290	APLP1	0.18215	-0.0425716	0.582458	0.560766	0.702671	-6.24341
ENSG00000105321	CCDC9	0.297919	2.19463	1.93221	0.0544267	0.141217	-4.81176
ENSG00000105323	HNRNPUL1	-0.330677	2.81593	-2.50254	0.0129487	0.0506627	-3.62669
ENSG00000105325	FZR1	0.0136948	1.65731	0.0950867	0.92432	0.956518	-6.61353
ENSG00000105327	BBC3	0.400601	1.18866	1.85111	0.0652943	0.160209	-4.88677
ENSG00000105329	TGFB1	0.18428	3.90568	1.41436	0.158459	0.29817	-5.7112
ENSG00000105339	DENND3	0.36525	5.27184	1.97886	0.0488927	0.131359	-4.77257
ENSG00000105341	DMAC2	-0.227465	0.404934	-1.5152	0.130944	0.261317	-5.34154
ENSG00000105352	CEACAM4	0.467065	1.46454	1.88889	0.0600262	0.151125	-4.82338
ENSG00000105355	PLIN3	-0.0328601	3.02235	-0.303222	0.761964	0.854011	-6.63927
ENSG00000105357	MYH14	-1.09994	0.63407	-3.71211	0.000251744	0.0026647	0.0576342
ENSG00000105364	MRPL4	-0.683028	-0.117551	-3.45978	0.000632223	0.00528319	-0.685815
ENSG00000105372	RPS19	-0.282134	4.93682	-1.46116	0.145186	0.280688	-5.64356
ENSG00000105373	NOP53	-0.439609	2.46962	-2.741	0.00655261	0.0312822	-3.01849
ENSG00000105374	NKG7	1.23974	2.70737	4.06673	6.33483e-05	0.000941995	1.27063
ENSG00000105379	ETFB	-0.534247	1.20262	-3.16704	0.00172491	0.0115904	-1.74004
ENSG00000105383	CD33	-0.559319	-0.00456142	-2.87025	0.0044409	0.0237742	-2.44695
ENSG00000105388	CEACAM5	0.205494	1.16298	0.541196	0.588839	0.723948	-6.41193
ENSG00000105393	BABAM1	0.0092612	1.21106	0.0523801	0.958266	0.975913	-6.58238
ENSG00000105397	TYK2	0.127904	3.64032	0.910699	0.363302	0.528401	-6.28693
ENSG00000105401	CDC37	-0.202746	3.32409	-1.46385	0.144449	0.279638	-5.63827
ENSG00000105402	NAPA	0.818189	4.51471	5.72355	2.88406e-08	1.87013e-06	8.539
ENSG00000105404	RABAC1	-0.0376863	2.50075	-0.232353	0.816448	0.889676	-6.64417
ENSG00000105438	KDELR1	-0.574358	1.7794	-3.72456	0.000240247	0.00257407	0.0261325
ENSG00000105443	CYTH2	-0.500674	1.58933	-3.48478	0.000578423	0.0049256	-0.773069
ENSG00000105483	CARD8	0.310782	3.47642	2.21665	0.0275179	0.0877221	-4.2855
ENSG00000105486	LIG1	-0.336367	0.0199389	-1.34045	0.181276	0.328272	-5.51204
ENSG00000105499	PLA2G4C	0.324336	1.26836	1.30353	0.193554	0.343676	-5.72102
ENSG00000105501	SIGLEC5	0.961093	2.36464	3.54977	0.000457932	0.00410873	-0.559266
ENSG00000105514	RAB3D	0.206475	1.93736	1.05093	0.294271	0.456549	-6.08467
ENSG00000105518	TMEM205	-0.0135851	0.611975	-0.0759071	0.939552	0.96638	-6.48832
ENSG00000105519	CAPS	-1.53238	1.1451	-4.17458	4.08336e-05	0.00065896	1.69397
ENSG00000105520	PLPPR2	0.319215	1.85567	1.72255	0.0861661	0.195217	-5.16574
ENSG00000105523	FAM83E	-0.851928	-0.47258	-3.09352	0.00219507	0.0139408	-1.75378
ENSG00000105556	MIER2	-0.579122	0.0376912	-2.90356	0.00400824	0.0220185	-2.36118
ENSG00000105559	PLEKHA4	-0.287245	0.0755409	-1.17961	0.23924	0.399304	-5.72459
ENSG00000105568	PPP2R1A	-0.434569	2.40193	-3.04884	0.00253583	0.015524	-2.16004
ENSG00000105576	TNPO2	-0.194969	1.17911	-1.28016	0.201636	0.353563	-5.76753
ENSG00000105583	WDR83OS	0.0319769	1.60123	0.13031	0.896423	0.93991	-6.59115
ENSG00000105607	GCDH	-0.49969	-0.159695	-2.29633	0.0224578	0.0756328	-3.83144
ENSG00000105609	LILRB5	-0.122178	-0.110039	-0.843067	0.399971	0.564246	-5.99702
ENSG00000105612	DNASE2	-0.0155583	1.22221	-0.0804244	0.935962	0.963867	-6.55932
ENSG00000105618	PRPF31	-0.590964	0.205607	-3.63785	0.000331862	0.00324414	-0.135735
ENSG00000105619	TFPT	-0.238478	-0.0587104	-1.22386	0.222121	0.378741	-5.65318
ENSG00000105639	JAK3	0.730913	3.72399	4.09702	5.60493e-05	0.000855426	1.34562
ENSG00000105640	RPL18A	-0.42654	4.50715	-2.2169	0.0275008	0.0877221	-4.28974
ENSG00000105643	ARRDC2	0.1985	2.3484	1.17756	0.240057	0.400051	-5.97827
ENSG00000105647	PIK3R2	-0.430462	-0.0252621	-1.71186	0.088123	0.198146	-4.97634
ENSG00000105655	ISYNA1	0.11706	0.0979419	0.571094	0.568432	0.708669	-6.24948
ENSG00000105656	ELL	0.187979	2.77801	1.17835	0.239743	0.399937	-5.99498
ENSG00000105669	COPE	0.0222586	3.32024	0.182956	0.854976	0.913731	-6.67442
ENSG00000105671	DDX49	0.16908	0.925826	0.953719	0.341117	0.506785	-6.07796
ENSG00000105676	ARMC6	-0.0688097	-0.0393725	-0.370162	0.711565	0.818109	-6.28725
ENSG00000105677	TMEM147	-0.562867	0.495609	-2.94597	0.00351314	0.0198755	-2.30626
ENSG00000105697	HAMP	1.49874	1.23296	3.69089	0.000272549	0.00279686	0.0955047
ENSG00000105698	USF2	-0.00219947	3.702	-0.0162185	0.987073	0.992923	-6.69511
ENSG00000105699	LSR	-0.0770779	0.525897	-0.322342	0.747454	0.84425	-6.43067
ENSG00000105700	KXD1	-0.388652	2.10104	-3.01382	0.00283622	0.0168292	-2.24898
ENSG00000105701	FKBP8	-0.127249	3.51005	-1.01182	0.312571	0.476309	-6.19037
ENSG00000105705	SUGP1	-0.0604888	0.780501	-0.352883	0.724464	0.827238	-6.43605
ENSG00000105707	HPN	0.809565	0.545564	2.71715	0.0070297	0.0328587	-2.86573
ENSG00000105711	SCN1B	0.822442	1.62574	3.05181	0.00251175	0.015447	-2.07343
ENSG00000105722	ERF	-0.449324	1.90533	-2.38094	0.0179935	0.0646688	-3.88455
ENSG00000105723	GSK3A	-0.0364331	1.78512	-0.295683	0.767709	0.857483	-6.58711
ENSG00000105726	ATP13A1	0.128423	1.62647	0.752816	0.452246	0.613379	-6.31753
ENSG00000105738	SIPA1L3	-0.255689	1.09407	-1.11985	0.263819	0.424837	-5.95482
ENSG00000105755	ETHE1	-0.70697	0.403923	-3.42099	0.000725068	0.00589187	-0.881806
ENSG00000105771	SMG9	0.0148929	2.0342	0.0855563	0.931885	0.961013	-6.64335
ENSG00000105778	AVL9	0.281477	1.94643	2.21444	0.0276714	0.0880406	-4.2316
ENSG00000105792	CFAP69	-0.649203	0.211856	-3.00106	0.00295364	0.0173586	-2.10052
ENSG00000105808	RASA4	-0.301212	1.06785	-1.33723	0.182324	0.329261	-5.69787
ENSG00000105810	CDK6	-0.132363	-0.274612	-0.723023	0.47032	0.629188	-6.05798
ENSG00000105819	PMPCB	0.0581234	0.606562	0.452178	0.65152	0.773091	-6.36443
ENSG00000105821	DNAJC2	0.240812	0.374331	1.59556	0.11181	0.233635	-5.19198
ENSG00000105835	NAMPT	0.599844	8.86677	3.21218	0.00148436	0.0103558	-1.65199
ENSG00000105851	PIK3CG	0.189827	1.54619	1.13936	0.255609	0.415658	-5.95516
ENSG00000105854	PON2	-0.839021	-0.434234	-3.82421	0.000164509	0.00195347	0.577907
ENSG00000105855	ITGB8	-0.462563	1.47861	-2.42963	0.0157961	0.0589267	-3.74811
ENSG00000105856	HBP1	0.465709	3.32511	3.59162	0.000393277	0.00369463	-0.466465
ENSG00000105866	SP4	0.351437	-0.395033	1.39328	0.164732	0.306719	-5.32536
ENSG00000105875	WDR91	0.0566253	1.04761	0.269046	0.788109	0.871016	-6.51031
ENSG00000105877	DNAH11	-0.567136	1.44612	-1.98228	0.0485071	0.13068	-4.6996
ENSG00000105879	CBLL1	0.34889	0.598988	2.00049	0.046493	0.126991	-4.50114
ENSG00000105887	MTPN	0.0186624	3.31323	0.144353	0.885334	0.932709	-6.68073
ENSG00000105928	GSDME	0.234014	-0.323711	0.960398	0.337753	0.503916	-5.84151
ENSG00000105939	ZC3HAV1	1.17083	2.758	4.9798	1.16498e-06	3.71136e-05	5.04349
ENSG00000105953	OGDH	-0.122796	2.47114	-1.10751	0.269102	0.430518	-6.06564
ENSG00000105963	ADAP1	-0.0972739	2.80197	-0.535995	0.592423	0.726887	-6.54107
ENSG00000105967	TFEC	1.28692	2.52551	4.66152	5.03387e-06	0.000120275	3.66772
ENSG00000105968	H2AZ2	-0.311498	1.94399	-2.09117	0.0374895	0.109802	-4.50768
ENSG00000105976	MET	0.0445029	0.236007	0.192421	0.847563	0.908968	-6.41283
ENSG00000105983	LMBR1	-0.174717	1.75627	-1.18009	0.23905	0.399119	-5.94511
ENSG00000105993	DNAJB6	0.334117	3.82825	3.25138	0.00130108	0.00932838	-1.57467
ENSG00000106003	LFNG	-0.185163	1.96977	-1.24228	0.215259	0.370133	-5.89197
ENSG00000106009	BRAT1	-0.277945	0.297316	-1.96403	0.0505983	0.134328	-4.57206
ENSG00000106012	IQCE	-0.0617313	1.18379	-0.408582	0.683185	0.797494	-6.49643
ENSG00000106028	SSBP1	-0.214059	1.41659	-1.28569	0.199702	0.351487	-5.78445
ENSG00000106052	TAX1BP1	0.0375164	2.67067	0.293033	0.769732	0.858222	-6.62998
ENSG00000106066	CPVL	-0.230925	1.56339	-1.24923	0.21271	0.367354	-5.83971
ENSG00000106069	CHN2	-0.547427	-0.10103	-2.20644	0.0282332	0.0892797	-4.01804
ENSG00000106070	GRB10	0.158123	1.70864	0.659782	0.509981	0.663648	-6.39361
ENSG00000106077	ABHD11	-0.999891	0.0774802	-4.70333	4.17114e-06	0.00010448	3.93731
ENSG00000106089	STX1A	-0.539515	0.369018	-2.35916	0.0190608	0.067446	-3.80159
ENSG00000106100	NOD1	0.0640601	-0.374738	0.275016	0.783524	0.867898	-6.19229
ENSG00000106105	GARS1	0.00468764	2.338	0.0293776	0.976586	0.986168	-6.66063
ENSG00000106144	CASP2	-0.0141901	0.130075	-0.0885574	0.929502	0.959625	-6.37614
ENSG00000106153	CHCHD2	0.00953318	3.34826	0.0616069	0.950924	0.972055	-6.69027
ENSG00000106211	HSPB1	-0.801129	3.69353	-2.72858	0.00679728	0.0321385	-3.06906
ENSG00000106244	PDAP1	0.0901293	2.93681	0.547501	0.584507	0.720858	-6.53564
ENSG00000106245	BUD31	0.385791	2.60006	2.51644	0.0124609	0.0492501	-3.57324
ENSG00000106258	CYP3A5	-0.584547	-0.190401	-2.54046	0.0116566	0.0469529	-3.27669
ENSG00000106261	ZKSCAN1	0.0596589	1.65011	0.467044	0.640862	0.764406	-6.50623
ENSG00000106263	EIF3B	-0.433911	1.47478	-3.17415	0.00168477	0.0113673	-1.74211
ENSG00000106266	SNX8	0.206898	2.47961	1.0806	0.280884	0.442474	-6.08948
ENSG00000106268	NUDT1	-0.0466462	0.622132	-0.138955	0.889594	0.93526	-6.49419
ENSG00000106290	TAF6	-0.531256	0.476631	-2.62832	0.00909426	0.0397457	-3.1341
ENSG00000106330	MOSPD3	-0.329757	-0.347697	-1.76272	0.0791292	0.183714	-4.82517
ENSG00000106344	RBM28	-0.348626	0.40022	-1.94391	0.0529917	0.138835	-4.62867
ENSG00000106346	USP42	0.303046	0.200668	1.8174	0.0703145	0.168988	-4.76711
ENSG00000106348	IMPDH1	-0.0111098	3.20559	-0.0754533	0.939912	0.966419	-6.68811
ENSG00000106367	AP1S1	-0.129736	0.0116955	-0.682692	0.495413	0.65181	-6.15889
ENSG00000106392	C1GALT1	0.648686	1.96381	3.56668	0.000430688	0.00393292	-0.479727
ENSG00000106397	PLOD3	-0.680908	1.73585	-4.18885	3.85031e-05	0.000633327	1.73204
ENSG00000106399	RPA3	-0.120162	-0.176952	-0.506289	0.613085	0.742704	-6.21267
ENSG00000106400	ZNHIT1	-0.156136	1.90472	-1.17453	0.241265	0.400974	-5.95614
ENSG00000106415	GLCCI1	-0.208424	-0.0714391	-0.978148	0.328916	0.493875	-5.89366
ENSG00000106459	NRF1	0.0425157	0.0318511	0.258479	0.796243	0.877052	-6.33592
ENSG00000106460	TMEM106B	-0.109773	0.555723	-0.635321	0.525781	0.676486	-6.26993
ENSG00000106462	EZH2	0.81282	0.289756	3.43737	0.000684401	0.00562844	-0.722884
ENSG00000106541	AGR2	-0.463888	1.85959	-1.21942	0.223796	0.380623	-5.90644
ENSG00000106546	AHR	0.262016	2.13744	1.5486	0.122701	0.249511	-5.46263
ENSG00000106554	CHCHD3	-0.163072	0.398664	-0.887983	0.375376	0.539984	-6.06206
ENSG00000106560	GIMAP2	0.732985	1.15787	2.70877	0.00720449	0.0335166	-2.92437
ENSG00000106565	TMEM176B	1.54563	1.88873	4.99961	1.06099e-06	3.45841e-05	5.18323
ENSG00000106588	PSMA2	0.192453	1.51449	0.956582	0.339672	0.50588	-6.11788
ENSG00000106591	MRPL32	-0.0258324	-0.198469	-0.115336	0.908268	0.946137	-6.31207
ENSG00000106603	COA1	-0.109258	1.32545	-0.882247	0.378463	0.542615	-6.20716
ENSG00000106605	BLVRA	-0.261723	1.80353	-1.32462	0.186468	0.334601	-5.76128
ENSG00000106608	URGCP	-0.436428	-0.195825	-2.2658	0.0242912	0.0799862	-3.88389
ENSG00000106609	TMEM248	0.088544	2.10812	0.706951	0.480234	0.637979	-6.39786
ENSG00000106615	RHEB	0.259042	2.35033	1.98874	0.047784	0.129334	-4.72115
ENSG00000106617	PRKAG2	0.158787	2.26998	1.17671	0.240394	0.400283	-5.96434
ENSG00000106628	POLD2	-0.771969	0.144097	-3.62959	0.000342132	0.0033313	-0.158723
ENSG00000106635	BCL7B	-0.0146407	1.62076	-0.116864	0.907059	0.945377	-6.60532
ENSG00000106636	YKT6	0.211501	1.65298	1.65451	0.0992371	0.215174	-5.26441
ENSG00000106638	TBL2	-0.0953276	1.32176	-0.626644	0.531445	0.680394	-6.39952
ENSG00000106665	CLIP2	-0.326987	0.43617	-2.01723	0.044705	0.123271	-4.49272
ENSG00000106682	EIF4H	-0.0406	3.08576	-0.34819	0.727981	0.829522	-6.62841
ENSG00000106683	LIMK1	-0.146562	1.40054	-1.08927	0.277051	0.438048	-6.01628
ENSG00000106714	CNTNAP3	-0.404226	0.723971	-1.39723	0.163542	0.305253	-5.56071
ENSG00000106723	SPIN1	-0.271868	0.359086	-1.45832	0.145967	0.281653	-5.40348
ENSG00000106733	NMRK1	0.43648	0.845434	2.46094	0.0145118	0.0555854	-3.55622
ENSG00000106780	MEGF9	0.139702	1.86648	0.72916	0.466564	0.626507	-6.36479
ENSG00000106785	TRIM14	0.127787	1.52509	0.60094	0.548407	0.693719	-6.40164
ENSG00000106799	TGFBR1	0.353891	2.10424	1.82531	0.0691086	0.166742	-5.00682
ENSG00000106803	SEC61B	-0.0835429	2.47171	-0.470885	0.63812	0.762521	-6.5615
ENSG00000106829	TLE4	0.501216	3.57565	4.10105	5.51412e-05	0.000845499	1.3602
ENSG00000106853	PTGR1	-0.428905	0.457654	-2.30618	0.0218926	0.0740078	-3.90632
ENSG00000106868	SUSD1	0.0222006	1.09618	0.148378	0.88216	0.931059	-6.54132
ENSG00000106948	AKNA	0.246436	3.4717	1.63499	0.103269	0.221237	-5.37658
ENSG00000106952	TNFSF8	-0.0241877	0.826857	-0.0887352	0.929361	0.959579	-6.51768
ENSG00000106976	DNM1	-0.669613	-0.381135	-1.90267	0.0581947	0.147761	-4.60355
ENSG00000106991	ENG	-0.258306	2.30109	-1.27825	0.202308	0.354362	-5.85904
ENSG00000106992	AK1	-0.794998	-0.739508	-2.99833	0.00297932	0.0174782	-1.9792
ENSG00000107020	PLGRKT	0.424584	0.646135	2.09392	0.0372418	0.109234	-4.31983
ENSG00000107036	RIC1	0.402073	0.455571	2.51639	0.0124626	0.0492501	-3.33899
ENSG00000107077	KDM4C	0.111363	1.28803	0.75716	0.449644	0.610925	-6.2888
ENSG00000107099	DOCK8	0.276649	3.96375	2.03679	0.0426899	0.119863	-4.6616
ENSG00000107104	KANK1	-0.140498	-0.232257	-0.659377	0.510241	0.663648	-6.114
ENSG00000107140	TESK1	-0.0892661	0.776582	-0.541178	0.588851	0.723948	-6.36518
ENSG00000107164	FUBP3	-0.264642	0.652008	-1.51901	0.129983	0.259936	-5.37492
ENSG00000107175	CREB3	-0.195367	0.34424	-1.27489	0.203494	0.355934	-5.64177
ENSG00000107201	DDX58	2.2236	2.35643	6.433	6.02668e-10	8.35586e-08	12.3083
ENSG00000107223	EDF1	-0.319654	2.79457	-1.63401	0.103475	0.221383	-5.37113
ENSG00000107242	PIP5K1B	-0.4321	-0.181448	-2.39688	0.017246	0.0628544	-3.58235
ENSG00000107249	GLIS3	-1.34604	-0.430892	-5.95091	8.64361e-09	7.21082e-07	9.77853
ENSG00000107262	BAG1	0.0615524	2.71077	0.353202	0.724225	0.827062	-6.60777
ENSG00000107263	RAPGEF1	-0.0647631	3.75441	-0.440033	0.660281	0.779958	-6.60149
ENSG00000107281	NPDC1	-0.370917	-0.555304	-1.38763	0.166444	0.308681	-5.34064
ENSG00000107290	SETX	0.479271	2.3787	2.97478	0.00320945	0.0184543	-2.34833
ENSG00000107331	ABCA2	0.140742	1.88022	0.757743	0.449295	0.610808	-6.34277
ENSG00000107341	UBE2R2	0.141778	2.10784	1.04855	0.295366	0.457671	-6.10515
ENSG00000107371	EXOSC3	-0.234054	0.681222	-1.25121	0.211989	0.36645	-5.73576
ENSG00000107372	ZFAND5	0.0799552	3.67558	0.534437	0.593498	0.727481	-6.55479
ENSG00000107404	DVL1	-0.372922	0.552649	-2.07177	0.0392794	0.11316	-4.4243
ENSG00000107438	PDLIM1	-1.56242	0.905514	-5.87469	1.29941e-08	9.99326e-07	9.35094
ENSG00000107521	HPS1	0.316994	2.75834	2.59082	0.0101188	0.0428132	-3.40007
ENSG00000107551	RASSF4	0.401297	1.72659	2.05365	0.0410156	0.116424	-4.53401
ENSG00000107566	ERLIN1	0.19793	0.942527	0.890017	0.374284	0.538742	-6.12927
ENSG00000107581	EIF3A	-0.0398739	2.2319	-0.2991	0.765104	0.855387	-6.61142
ENSG00000107614	TRDMT1	-0.0607034	0.33569	-0.275767	0.782947	0.867828	-6.40382
ENSG00000107625	DDX50	0.0901726	0.325235	0.579218	0.562946	0.704954	-6.25989
ENSG00000107643	MAPK8	-0.169269	0.83723	-1.00983	0.313519	0.47731	-6.01861
ENSG00000107651	SEC23IP	-0.0348794	1.14988	-0.205661	0.837218	0.902494	-6.5372
ENSG00000107669	ATE1	-0.054117	-0.0465046	-0.224338	0.822671	0.893367	-6.3598
ENSG00000107736	CDH23	0.315339	0.975448	1.86718	0.0630089	0.156355	-4.81804
ENSG00000107738	VSIR	0.328048	4.34334	1.87617	0.0617592	0.154246	-4.96943
ENSG00000107742	SPOCK2	0.439121	0.20747	1.56662	0.118427	0.24328	-5.16958
ENSG00000107745	MICU1	0.4929	1.94398	3.70156	0.000261897	0.0027224	-0.0342046
ENSG00000107758	PPP3CB	0.175121	0.788156	1.12608	0.261178	0.421957	-5.86764
ENSG00000107771	CCSER2	0.220036	1.12623	1.49997	0.134842	0.26665	-5.44704
ENSG00000107796	ACTA2	-0.224568	0.16644	-0.902327	0.367723	0.532623	-5.98448
ENSG00000107798	LIPA	0.219083	3.12558	0.735207	0.46288	0.623485	-6.40794
ENSG00000107819	SFXN3	-0.341111	1.42943	-2.17516	0.0305248	0.0946712	-4.28974
ENSG00000107829	FBXW4	-0.19202	0.790778	-1.11337	0.266582	0.427887	-5.89954
ENSG00000107854	TNKS2	0.581468	1.23519	3.47318	0.000602844	0.00508953	-0.725307
ENSG00000107862	GBF1	0.0344528	0.667948	0.251914	0.801308	0.880365	-6.45473
ENSG00000107863	ARHGAP21	-0.177794	1.31291	-1.01083	0.313042	0.476877	-6.08331
ENSG00000107874	CUEDC2	0.0320916	0.463464	0.196126	0.844666	0.907145	-6.42877
ENSG00000107897	ACBD5	0.295336	0.127111	1.87194	0.0623447	0.155137	-4.66473
ENSG00000107902	LHPP	-0.770878	-0.220976	-3.70579	0.00025778	0.00269956	0.132201
ENSG00000107929	LARP4B	0.33936	2.78845	2.70634	0.00725599	0.0336607	-3.10392
ENSG00000107937	GTPBP4	0.0192251	0.339703	0.10112	0.919533	0.95301	-6.4355
ENSG00000107938	EDRF1	0.0250122	-0.0249562	0.148389	0.882151	0.931059	-6.34164
ENSG00000107949	BCCIP	-0.349064	-0.03354	-1.98726	0.0479489	0.129637	-4.46776
ENSG00000107959	PITRM1	-0.186518	0.762391	-1.14602	0.252846	0.41284	-5.87961
ENSG00000107968	MAP3K8	0.389868	3.59759	2.47237	0.0140663	0.0542163	-3.70746
ENSG00000108010	GLRX3	-0.245896	2.03777	-1.41875	0.157178	0.296183	-5.66157
ENSG00000108021	TASOR2	0.0126471	1.17925	0.0742061	0.940904	0.966919	-6.54616
ENSG00000108039	XPNPEP1	-0.341994	1.66028	-2.16189	0.0315448	0.09707	-4.3423
ENSG00000108061	SHOC2	0.338429	3.03999	2.40388	0.0169267	0.0620582	-3.85566
ENSG00000108064	TFAM	0.105497	0.189879	0.555233	0.579216	0.716923	-6.24834
ENSG00000108094	CUL2	0.586658	0.309288	3.04357	0.00257906	0.0157008	-1.95027
ENSG00000108100	CCNY	0.00499829	1.65944	0.0309894	0.975302	0.98521	-6.61379
ENSG00000108106	UBE2S	0.318786	1.8182	1.39257	0.164948	0.306889	-5.66307
ENSG00000108107	RPL28	-0.105619	5.53747	-0.607938	0.543763	0.690207	-6.50837
ENSG00000108175	ZMIZ1	0.24293	3.2834	1.40685	0.160673	0.301098	-5.71454
ENSG00000108179	PPIF	0.599612	5.67899	3.0577	0.00246465	0.0152688	-2.1504
ENSG00000108187	PBLD	0.303099	0.22675	1.69823	0.0906688	0.202039	-5.00573
ENSG00000108219	TSPAN14	0.305154	3.84198	2.15519	0.0320709	0.0981293	-4.41999
ENSG00000108244	KRT23	0.0382135	2.25743	0.173654	0.862273	0.918241	-6.63539
ENSG00000108256	NUFIP2	0.109003	2.83814	0.638697	0.523586	0.674543	-6.47439
ENSG00000108262	GIT1	-0.288749	0.763977	-1.80602	0.0720784	0.172051	-4.92464
ENSG00000108298	RPL19	-0.39848	4.63561	-2.14562	0.0328352	0.0999475	-4.44092
ENSG00000108312	UBTF	-0.277922	1.59609	-2.18247	0.0299757	0.093617	-4.29246
ENSG00000108342	CSF3	0.645688	0.0535444	1.8581	0.0642925	0.158581	-4.675
ENSG00000108344	PSMD3	0.0218765	1.4568	0.146751	0.883443	0.932013	-6.58604
ENSG00000108349	CASC3	0.0494685	3.02529	0.41098	0.681428	0.796199	-6.60377
ENSG00000108352	RAPGEFL1	-0.479359	0.444385	-2.66987	0.00806888	0.0364191	-3.03002
ENSG00000108387	SEPTIN4	-0.070161	0.931615	-0.310569	0.756378	0.850073	-6.48627
ENSG00000108389	MTMR4	0.117226	1.04096	0.669036	0.50407	0.659371	-6.32331
ENSG00000108395	TRIM37	-0.0724052	-0.194857	-0.318885	0.750071	0.845494	-6.27723
ENSG00000108405	P2RX1	0.152214	1.61624	0.694052	0.488273	0.645349	-6.37326
ENSG00000108406	DHX40	0.223825	0.733259	1.32288	0.187044	0.335019	-5.64274
ENSG00000108423	TUBD1	-0.246723	-0.333748	-1.13931	0.255627	0.415658	-5.67044
ENSG00000108424	KPNB1	0.427554	4.09898	3.26878	0.00122664	0.00889181	-1.52103
ENSG00000108433	GOSR2	-0.225873	1.05674	-1.7327	0.0843428	0.192103	-5.07949
ENSG00000108439	PNPO	-0.687593	-0.240139	-3.4828	0.000582516	0.00495617	-0.593037
ENSG00000108443	RPS6KB1	0.0715281	1.1047	0.424679	0.671424	0.788817	-6.46628
ENSG00000108465	CDK5RAP3	-0.011593	2.49126	-0.0954109	0.924062	0.956416	-6.65946
ENSG00000108468	CBX1	-0.120114	0.313159	-0.80304	0.42269	0.586133	-6.11249
ENSG00000108469	RECQL5	-0.0732811	0.818132	-0.38635	0.699556	0.809787	-6.45736
ENSG00000108474	PIGL	-0.649444	0.99889	-2.22044	0.0272568	0.0871156	-4.1801
ENSG00000108479	GALK1	0.147485	0.688097	0.900793	0.368537	0.533403	-6.0891
ENSG00000108509	CAMTA2	-0.249348	2.39935	-1.64551	0.101081	0.218162	-5.33931
[truncated: 7,845 more rows]

## Sheet: B (LRTI v IPC)
ENSEMBL_ID	gene_symbol	logFC	AveExpr	t	P.Value	adj.P.Val	B
ENSG00000000419	DPM1	0.0382852	1.07824	0.3139	0.753831	0.85739	-6.2719
ENSG00000000938	FGR	0.256524	5.77303	2.21156	0.0278046	0.106834	-4.08406
ENSG00000001036	FUCA2	-0.332833	0.914216	-3.255	0.0012732	0.0147033	-1.26222
ENSG00000001084	GCLC	-0.325569	1.00521	-2.05477	0.0408294	0.13765	-4.29418
ENSG00000001167	NFYA	0.183713	1.2256	1.47398	0.141609	0.306411	-5.27387
ENSG00000001626	CFTR	0.219231	1.78605	0.700356	0.484287	0.660678	-6.14853
ENSG00000001629	ANKIB1	0.211112	1.30408	1.59351	0.112173	0.2648	-5.10166
ENSG00000001630	CYP51A1	0.0644795	0.477262	0.448411	0.654204	0.792497	-6.12018
ENSG00000001631	KRIT1	-0.145959	0.749377	-1.04309	0.297806	0.488275	-5.75162
ENSG00000002016	RAD52	-0.0039123	-0.369314	-0.0244459	0.980514	0.989764	-6.06444
ENSG00000002330	BAD	0.0554052	0.632203	0.328665	0.742655	0.850712	-6.20782
ENSG00000002549	LAP3	0.559559	3.85789	2.63047	0.00899876	0.0511453	-3.11959
ENSG00000002586	CD99	-0.230676	3.24764	-1.88609	0.0603182	0.177298	-4.73461
ENSG00000002587	HS3ST1	-0.0548765	0.075178	-0.252418	0.800904	0.885236	-6.12868
ENSG00000002822	MAD1L1	-0.165685	1.91514	-1.12799	0.26029	0.44732	-5.79028
ENSG00000002834	LASP1	0.0943102	3.80897	1.22019	0.223419	0.405258	-5.74563
ENSG00000002919	SNX11	0.0270545	1.73099	0.220836	0.825381	0.899784	-6.36413
ENSG00000002933	TMEM176A	0.387688	1.81734	2.13897	0.0333034	0.121172	-4.17199
ENSG00000003056	M6PR	0.167944	3.48283	1.37799	0.169308	0.34174	-5.54221
ENSG00000003147	ICA1	-0.634768	0.0509167	-3.61656	0.000354013	0.00632469	-0.0403721
ENSG00000003393	ALS2	-0.25126	0.267817	-1.88669	0.0602369	0.177267	-4.50136
ENSG00000003400	CASP10	0.301288	1.66682	1.97417	0.0493447	0.156395	-4.47978
ENSG00000003402	CFLAR	0.303832	6.4474	3.41256	0.000738561	0.010416	-0.86466
ENSG00000003436	TFPI	-0.571132	0.282693	-3.98542	8.59808e-05	0.00253412	1.2194
ENSG00000003509	NDUFAF7	0.0834798	-0.147781	0.583195	0.560231	0.725409	-5.92601
ENSG00000003756	RBM5	0.0776878	3.77088	0.975916	0.329948	0.52168	-6.00724
ENSG00000004059	ARF5	0.0418631	2.82694	0.410839	0.681505	0.813181	-6.37145
ENSG00000004142	POLDIP2	0.159851	0.506391	1.31879	0.188316	0.365133	-5.37902
ENSG00000004399	PLXND1	-0.292303	2.63361	-2.08708	0.0377854	0.131709	-4.33351
ENSG00000004455	AK2	0.0250572	2.35002	0.227661	0.820076	0.89718	-6.40957
ENSG00000004468	CD38	0.5692	1.45437	2.72202	0.00689528	0.0432263	-2.76271
ENSG00000004478	FKBP4	-0.174971	1.54827	-1.02282	0.307275	0.498733	-5.87955
ENSG00000004487	KDM1A	-0.346916	-0.116787	-2.72959	0.006743	0.0427905	-2.61794
ENSG00000004534	RBM6	0.000545846	1.90987	0.00616209	0.995088	0.99752	-6.40542
ENSG00000004660	CAMKK1	0.233764	-0.0460097	1.55372	0.121382	0.278268	-4.97168
ENSG00000004700	RECQL	0.145096	0.289938	1.04863	0.295253	0.485545	-5.64345
ENSG00000004766	VPS50	-0.357257	0.125096	-2.17848	0.0302046	0.112969	-3.91998
ENSG00000004779	NDUFAB1	-0.203455	0.616793	-1.05301	0.293246	0.483082	-5.73104
ENSG00000004838	ZMYND10	-0.761345	0.154483	-3.14379	0.00184702	0.0183657	-1.54439
ENSG00000004864	SLC25A13	0.172812	2.688	0.8984	0.369744	0.56074	-6.05479
ENSG00000004866	ST7	-1.04822	-0.417974	-5.72143	2.71143e-08	8.61012e-06	8.63269
ENSG00000004897	CDC27	-0.136568	1.9258	-1.39084	0.165378	0.337336	-5.46825
ENSG00000004975	DVL2	0.131819	1.24429	1.03642	0.300899	0.492034	-5.82385
ENSG00000005001	PRSS22	0.143766	0.26716	0.577166	0.564291	0.728318	-6.03927
ENSG00000005007	UPF1	0.0956328	2.44454	1.06627	0.287218	0.475702	-5.88252
ENSG00000005020	SKAP2	0.227462	3.43946	1.80504	0.0721424	0.199039	-4.88134
ENSG00000005022	SLC25A5	-0.215177	2.40555	-1.66332	0.0973672	0.241759	-5.0947
ENSG00000005059	MCUB	0.0927828	1.20374	0.574176	0.56631	0.730127	-6.16426
ENSG00000005075	POLR2J	0.231509	1.47566	1.62703	0.104856	0.254175	-5.07695
ENSG00000005156	LIG3	-0.257423	1.15471	-1.93198	0.0543708	0.165653	-4.54001
ENSG00000005175	RPAP3	0.00171854	0.300805	0.0104228	0.991691	0.995655	-6.18662
ENSG00000005187	ACSM3	-0.0116042	0.976123	-0.0627891	0.949979	0.971311	-6.304
ENSG00000005194	CIAPIN1	-0.157341	0.0525137	-1.023	0.307189	0.498733	-5.6527
ENSG00000005206	SPPL2B	-0.198374	1.02279	-1.26026	0.208624	0.390139	-5.55876
ENSG00000005238	FAM214B	0.0472344	1.83519	0.353739	0.7238	0.840978	-6.33648
ENSG00000005302	MSL3	0.41117	2.87542	3.27266	0.00119901	0.0140848	-1.30359
ENSG00000005339	CREBBP	-0.0112553	4.54049	-0.067538	0.946202	0.969645	-6.47151
ENSG00000005379	TSPOAP1	0.457369	1.38784	2.32816	0.020616	0.0875279	-3.7268
ENSG00000005448	WDR54	-0.872051	-0.687194	-4.50079	9.93853e-06	0.000559057	3.21149
ENSG00000005483	KMT2E	0.235253	3.8906	2.48164	0.0136647	0.0677999	-3.48885
ENSG00000005486	RHBDD2	-0.00308574	2.90589	-0.026677	0.978736	0.989198	-6.45699
ENSG00000005700	IBTK	-0.206137	0.184738	-1.85401	0.0647895	0.185727	-4.53928
ENSG00000005801	ZNF195	-0.378974	0.104364	-2.30716	0.0217755	0.0903447	-3.65145
ENSG00000005810	MYCBP2	0.0395842	2.10196	0.359929	0.719172	0.838277	-6.35239
ENSG00000005812	FBXL3	0.272099	1.52143	2.1963	0.0288904	0.109806	-4.03
ENSG00000005844	ITGAL	0.348014	3.10404	2.95048	0.00344108	0.0275174	-2.25944
ENSG00000005884	ITGA3	-0.405351	-0.114763	-2.01066	0.0453203	0.147482	-4.22579
ENSG00000005889	ZFX	0.154864	2.3305	1.32633	0.185812	0.361488	-5.56952
ENSG00000005893	LAMP2	0.178782	3.43312	1.51471	0.130973	0.291564	-5.34856
ENSG00000006007	GDE1	-0.292321	0.699227	-2.24071	0.0258289	0.101334	-3.86458
ENSG00000006015	REX1BD	-0.260241	0.724463	-1.86591	0.0630999	0.182547	-4.60343
ENSG00000006118	TMEM132A	-0.0118091	0.941961	-0.0784256	0.937546	0.964389	-6.30769
ENSG00000006125	AP2B1	0.0360556	3.23832	0.354836	0.722979	0.840757	-6.40393
ENSG00000006194	ZNF263	-0.0635796	0.103797	-0.522433	0.601782	0.756956	-6.03476
ENSG00000006282	SPATA20	-0.428405	0.265684	-3.42403	0.000709293	0.0101465	-0.683421
ENSG00000006327	TNFRSF12A	-0.123919	0.799955	-0.567162	0.571059	0.733954	-6.1425
ENSG00000006451	RALA	-0.0146679	1.87294	-0.109201	0.913121	0.951357	-6.39541
ENSG00000006453	BAIAP2L1	0.0321142	0.847417	0.247269	0.804882	0.887561	-6.26675
ENSG00000006459	KDM7A	0.373727	1.11929	2.89281	0.00411797	0.030951	-2.2999
ENSG00000006530	AGK	-0.0555339	1.29591	-0.482833	0.629592	0.775585	-6.2345
ENSG00000006534	ALDH3B1	-0.165035	1.64536	-1.22538	0.221463	0.40357	-5.66164
ENSG00000006576	PHTF2	-0.0709145	-0.0260621	-0.510147	0.610351	0.762667	-6.00176
ENSG00000006607	FARP2	-0.510957	0.705639	-2.89229	0.00412459	0.0309706	-2.29859
ENSG00000006634	DBF4	0.305213	-0.199378	1.73205	0.0843653	0.221287	-4.64562
ENSG00000006652	IFRD1	0.095739	4.28867	0.646294	0.518618	0.691304	-6.27005
ENSG00000006712	PAF1	0.241542	2.7213	2.30967	0.0216338	0.0901242	-3.86205
ENSG00000006715	VPS41	-0.130826	1.98982	-1.1016	0.27158	0.458959	-5.82171
ENSG00000006744	ELAC2	-0.307178	0.678174	-2.21279	0.027719	0.106588	-3.92247
ENSG00000006747	SCIN	-0.542593	0.0973832	-3.14088	0.00186478	0.0184492	-1.52451
ENSG00000006756	ARSD	-0.175435	0.368146	-1.62092	0.106161	0.256265	-4.9608
ENSG00000006831	ADIPOR2	-0.14405	1.58402	-1.28003	0.201595	0.381709	-5.58739
ENSG00000006837	CDKL3	0.104002	-0.137009	0.588613	0.556595	0.722326	-5.93542
ENSG00000007047	MARK4	-0.092935	1.65438	-0.855085	0.393235	0.582388	-6.03238
ENSG00000007062	PROM1	-0.982562	-0.450082	-4.18592	3.80669e-05	0.00143027	1.99245
ENSG00000007080	CCDC124	-0.170635	1.1781	-1.23355	0.218406	0.40122	-5.60821
ENSG00000007129	CEACAM21	-0.100807	-0.351632	-0.59313	0.553573	0.719674	-5.90614
ENSG00000007168	PAFAH1B1	0.139804	3.50359	1.76376	0.0788631	0.211188	-4.95409
ENSG00000007174	DNAH9	-1.03125	-0.500912	-4.97778	1.12549e-06	0.000120427	5.20395
ENSG00000007202	KIAA0100	-0.064023	2.16576	-0.662426	0.508243	0.682461	-6.20885
ENSG00000007237	AC005747.1	0.407049	3.71903	2.8937	0.00410664	0.0309066	-2.42903
ENSG00000007264	MATK	-0.421805	0.153213	-2.336	0.0201972	0.0863315	-3.60387
ENSG00000007341	ST7L	0.228506	0.981589	1.87865	0.0613312	0.179046	-4.59273
ENSG00000007392	LUC7L	-0.120741	1.0478	-1.18438	0.237268	0.421068	-5.64258
ENSG00000007516	BAIAP3	-0.538152	0.190872	-2.73839	0.00656986	0.0419959	-2.649
ENSG00000007520	TSR3	-0.0407415	0.580995	-0.275325	0.783269	0.874541	-6.21613
ENSG00000007541	PIGQ	-0.475494	0.395701	-2.88833	0.00417531	0.031219	-2.26889
ENSG00000007545	CRAMP1	-0.0197344	-0.0346407	-0.107032	0.91484	0.951817	-6.11618
ENSG00000007923	DNAJC11	-0.546462	0.309874	-3.55335	0.000446227	0.00748324	-0.2693
ENSG00000007944	MYLIP	0.566845	1.24428	3.72684	0.000234556	0.00483125	0.266284
ENSG00000008018	PSMB1	0.164785	2.33006	1.2081	0.228029	0.410895	-5.71632
ENSG00000008083	JARID2	0.24059	1.82867	2.10074	0.0365583	0.128712	-4.25657
ENSG00000008086	CDKL5	-0.421198	0.785861	-2.47069	0.0140808	0.0690639	-3.37115
ENSG00000008128	CDK11A	0.138815	2.20905	1.12598	0.261138	0.447837	-5.80521
ENSG00000008130	NADK	0.541071	5.63676	4.33325	2.05023e-05	0.000925803	2.43176
ENSG00000008226	DLEC1	-0.505636	-0.295628	-3.06233	0.00240979	0.0216047	-1.71551
ENSG00000008256	CYTH3	-0.146351	-0.0465169	-0.910185	0.363508	0.554614	-5.74465
ENSG00000008282	SYPL1	-0.175705	1.09402	-1.46393	0.144334	0.309826	-5.29116
ENSG00000008283	CYB561	-0.553679	0.119114	-2.91481	0.00384649	0.0296244	-2.17602
ENSG00000008294	SPAG9	-0.107831	4.46957	-0.969608	0.333079	0.524605	-6.01357
ENSG00000008323	PLEKHG6	0.183562	1.76165	1.05759	0.291154	0.480571	-5.8426
ENSG00000008382	MPND	0.101961	0.137452	0.601622	0.547913	0.716003	-5.98432
ENSG00000008394	MGST1	-0.476571	1.53666	-2.59919	0.00983975	0.0542647	-3.13482
ENSG00000008438	PGLYRP1	0.446589	0.987456	1.82806	0.0686051	0.192356	-4.6628
ENSG00000008513	ST3GAL1	0.111002	3.28286	0.994716	0.320733	0.512299	-5.98229
ENSG00000008516	MMP25	0.76487	4.66206	3.48919	0.000562539	0.00876374	-0.635031
ENSG00000008517	IL32	0.361211	2.10362	1.72753	0.0851748	0.222605	-4.95572
ENSG00000008710	PKD1	-0.440209	1.29605	-2.68732	0.00763372	0.0460456	-2.89719
ENSG00000008838	MED24	-0.259838	1.82673	-2.04513	0.0417763	0.139737	-4.38026
ENSG00000008869	HEATR5B	0.0269471	0.872123	0.175924	0.860481	0.922218	-6.26017
ENSG00000008952	SEC62	-0.08325	3.53371	-0.748172	0.454984	0.635716	-6.19777
ENSG00000008988	RPS20	-0.152136	4.63141	-1.10606	0.269651	0.45719	-5.87436
ENSG00000009307	CSDE1	-0.0232142	3.8003	-0.244144	0.807298	0.888992	-6.44468
ENSG00000009335	UBE3C	-0.177374	1.1164	-1.74995	0.0812224	0.215629	-4.85527
ENSG00000009413	REV3L	-0.224328	1.33568	-1.48243	0.139349	0.303352	-5.28672
ENSG00000009780	FAM76A	-0.375294	-0.0168128	-2.36924	0.0185029	0.0815095	-3.49154
ENSG00000009790	TRAF3IP3	0.339015	2.91298	2.19252	0.0291648	0.110262	-4.12018
ENSG00000009830	POMT2	-0.064839	0.00338938	-0.330412	0.741336	0.850169	-6.1041
ENSG00000009844	VTA1	0.280344	0.600976	1.82161	0.0695812	0.194259	-4.62791
ENSG00000009954	BAZ1B	-0.0987613	0.266415	-0.882604	0.378208	0.568495	-5.81564
ENSG00000010017	RANBP9	0.170696	1.31707	1.54517	0.123435	0.280559	-5.18743
ENSG00000010030	ETV7	1.21933	0.822021	4.38834	1.61968e-05	0.000789313	2.76178
ENSG00000010219	DYRK4	-0.799651	-0.424299	-4.05061	6.62029e-05	0.00208211	1.49575
ENSG00000010244	ZNF207	0.228735	3.73828	2.41474	0.0163876	0.0752104	-3.64462
ENSG00000010256	UQCRC1	-0.0147396	2.58408	-0.136636	0.891417	0.940325	-6.43621
ENSG00000010270	STARD3NL	-0.0667067	1.52476	-0.743719	0.45767	0.637616	-6.10625
ENSG00000010278	CD9	-0.426627	2.67546	-2.16555	0.03119	0.115426	-4.17761
ENSG00000010292	NCAPD2	0.0893377	0.514749	0.712415	0.476801	0.653527	-5.98625
ENSG00000010295	IFFO1	0.110747	0.19919	0.991476	0.322309	0.513982	-5.68824
ENSG00000010310	GIPR	-0.479291	-0.3554	-2.81142	0.00528067	0.0365819	-2.38463
ENSG00000010322	NISCH	0.0262063	1.42359	0.279533	0.780042	0.872958	-6.32451
ENSG00000010327	STAB1	0.228139	2.61387	1.44418	0.149806	0.316936	-5.4232
ENSG00000010361	FUZ	-0.494785	-0.0125132	-2.78947	0.00564167	0.0383138	-2.47993
ENSG00000010404	IDS	-0.0477927	3.33502	-0.543517	0.587207	0.745767	-6.32357
ENSG00000010539	ZNF200	0.372155	1.44646	2.7705	0.00597145	0.0396112	-2.66075
ENSG00000010610	CD4	-0.347543	1.98933	-2.82571	0.00505705	0.0356602	-2.57169
ENSG00000010626	LRRC23	-0.706149	0.342524	-3.48958	0.00056176	0.00876374	-0.49272
ENSG00000010671	BTK	0.260536	1.93386	2.07334	0.0390552	0.134145	-4.31215
ENSG00000010803	SCMH1	-0.225084	-0.175312	-1.53193	0.126668	0.285597	-5.00537
ENSG00000010810	FYN	0.152845	2.10493	1.00215	0.317134	0.508613	-5.91759
ENSG00000010818	HIVEP2	0.186912	2.1545	1.35027	0.178021	0.351754	-5.52965
ENSG00000011007	ELOA	-0.101564	0.299853	-0.772475	0.440485	0.624713	-5.90737
ENSG00000011009	LYPLA2	0.142462	1.89635	1.39997	0.16263	0.333736	-5.44604
ENSG00000011021	CLCN6	0.149028	1.22505	1.1273	0.26058	0.447347	-5.71586
ENSG00000011114	BTBD7	0.0549208	0.816407	0.520471	0.603146	0.758018	-6.15112
ENSG00000011132	APBA3	0.273642	0.883223	2.06804	0.0395549	0.135152	-4.2295
ENSG00000011198	ABHD5	-0.0622685	2.38735	-0.42452	0.671513	0.80575	-6.35108
ENSG00000011243	AKAP8L	-0.0992876	2.06243	-1.0184	0.309367	0.50128	-5.91241
ENSG00000011260	UTP18	0.158916	1.51057	1.35364	0.176942	0.3504	-5.47626
ENSG00000011275	RNF216	-0.134683	0.833268	-1.15902	0.247437	0.434128	-5.64039
ENSG00000011295	TTC19	-0.0703964	0.79119	-0.567383	0.570909	0.733954	-6.13545
ENSG00000011304	PTBP1	-0.0380832	3.10325	-0.346592	0.729158	0.843348	-6.40408
ENSG00000011405	PIK3C2A	-0.0935295	0.354245	-0.644239	0.519948	0.692692	-6.01183
ENSG00000011422	PLAUR	0.0967334	7.47071	0.684075	0.494493	0.669511	-6.19388
ENSG00000011451	WIZ	-0.034915	0.162344	-0.291609	0.770801	0.867425	-6.13736
ENSG00000011454	RABGAP1	-0.108647	1.55304	-0.969918	0.332924	0.524453	-5.9199
ENSG00000011485	PPP5C	-0.403681	0.35688	-2.62551	0.00912753	0.0515499	-2.94393
ENSG00000011523	CEP68	0.227814	1.33224	1.82233	0.0694709	0.194116	-4.73523
ENSG00000011566	MAP4K3	-0.337051	0.846333	-2.08044	0.038394	0.132811	-4.21797
ENSG00000011600	TYROBP	0.156755	6.85528	1.77913	0.0763038	0.206898	-4.89714
ENSG00000011638	TMEM159	0.0665801	0.288524	0.487638	0.626188	0.772649	-6.07562
ENSG00000012048	BRCA1	-0.0543653	0.478409	-0.346952	0.728888	0.843348	-6.17118
ENSG00000012061	ERCC1	-0.407981	1.87993	-3.62202	0.000346954	0.00625266	-0.153838
ENSG00000012124	CD22	0.334817	2.58082	1.47345	0.141753	0.30655	-5.38194
ENSG00000012171	SEMA3B	0.344925	-0.0117831	2.15323	0.0321543	0.117975	-3.91656
ENSG00000012211	PRICKLE3	0.170088	-0.12501	1.18989	0.235098	0.418879	-5.43621
ENSG00000012223	LTF	0.480772	1.15748	2.45238	0.0148018	0.0709735	-3.41814
ENSG00000012232	EXTL3	0.0701243	1.57963	0.530651	0.596081	0.753541	-6.23739
ENSG00000012660	ELOVL5	0.170293	3.21872	1.72661	0.0853411	0.222838	-5.01101
ENSG00000012779	ALOX5	0.324311	5.48555	2.56714	0.0107738	0.0577967	-3.27447
ENSG00000012822	CALCOCO1	-0.101011	2.06088	-1.06866	0.286144	0.474528	-5.86288
ENSG00000012983	MAP4K5	-0.543956	0.731981	-3.53737	0.000472883	0.00779741	-0.363721
ENSG00000013275	PSMC4	-0.0638748	1.77202	-0.636073	0.525248	0.697309	-6.19922
ENSG00000013288	MAN2B2	-0.122185	0.743272	-1.23182	0.219048	0.401631	-5.53991
ENSG00000013306	SLC25A39	-0.101612	1.47128	-0.81706	0.414589	0.601417	-6.04879
ENSG00000013364	MVP	0.0706042	4.27522	0.971265	0.332255	0.523779	-6.01342
ENSG00000013374	NUB1	0.323961	2.92987	1.86419	0.0633407	0.183067	-4.75494
ENSG00000013375	PGM3	-0.245728	0.0373768	-1.29961	0.194802	0.372173	-5.36169
ENSG00000013441	CLK1	0.246288	3.57953	2.30315	0.0220035	0.0910313	-3.896
ENSG00000013561	RNF14	-0.0412342	0.67171	-0.328697	0.74263	0.850712	-6.20503
ENSG00000013563	DNASE1L1	0.111606	1.35842	0.810186	0.418522	0.605575	-6.02365
ENSG00000013573	DDX11	-0.413321	0.858829	-1.80954	0.0714393	0.197597	-4.72441
ENSG00000013583	HEBP1	-0.0992709	0.326131	-0.723264	0.470121	0.647345	-5.9601
ENSG00000013588	GPRC5A	0.0318141	0.936696	0.130336	0.896394	0.943218	-6.29848
ENSG00000013725	CD6	-0.215429	1.16157	-1.46289	0.14462	0.309892	-5.30452
ENSG00000013810	TACC3	0.0849383	2.03023	0.707429	0.479889	0.65657	-6.16409
ENSG00000014164	ZC3H3	0.295017	1.93644	2.23391	0.0262786	0.102369	-3.98444
ENSG00000014216	CAPN1	-0.0358331	2.90904	-0.410438	0.681799	0.813181	-6.37469
ENSG00000014257	ACPP	0.283036	0.500572	1.66552	0.0969272	0.240826	-4.86984
ENSG00000014824	SLC30A9	-0.132398	0.509241	-1.08394	0.279323	0.46769	-5.67139
ENSG00000014919	COX15	0.00848405	0.450849	0.0698836	0.944336	0.968843	-6.21465
ENSG00000015133	CCDC88C	-0.379639	1.33149	-2.63628	0.0088497	0.0507618	-3.01851
ENSG00000015153	YAF2	0.130719	1.05467	0.919673	0.358535	0.549669	-5.90552
ENSG00000015171	ZMYND11	-0.304166	0.0178075	-2.22905	0.0266042	0.103332	-3.79904
ENSG00000015285	WAS	0.531405	4.05497	4.6196	5.87007e-06	0.000393095	3.59691
ENSG00000015475	BID	0.203353	4.52211	1.58738	0.113554	0.266848	-5.24442
ENSG00000015479	MATR3	-0.186039	2.40576	-1.74652	0.0818165	0.216793	-4.95625
ENSG00000015568	RGPD5	-0.547435	2.23433	-2.78465	0.00572383	0.0386722	-2.70092
ENSG00000015676	NUDCD3	-0.121563	0.655161	-1.00532	0.31561	0.50749	-5.77534
ENSG00000016864	GLT8D1	-0.173916	0.134935	-1.16766	0.243936	0.429549	-5.51927
ENSG00000017260	ATP2C1	-0.0368224	2.15928	-0.312961	0.754544	0.857666	-6.37537
ENSG00000017483	SLC38A5	0.199623	-0.450245	0.903511	0.367031	0.558793	-5.62329
ENSG00000017797	RALBP1	-0.081625	1.64906	-0.941657	0.34718	0.539315	-5.95615
ENSG00000018189	RUFY3	-0.409811	1.55681	-3.32675	0.000996068	0.0124275	-1.09594
ENSG00000018280	SLC11A1	-0.15654	6.37133	-1.1825	0.23801	0.421853	-5.76075
ENSG00000018510	AGPS	-0.284754	0.83104	-2.32158	0.0209736	0.0882701	-3.71437
ENSG00000019144	PHLDB1	-0.326318	0.470982	-1.88564	0.060379	0.177339	-4.54668
ENSG00000019169	MARCO	-1.04562	2.94622	-4.92551	1.44075e-06	0.000140423	4.92034
ENSG00000019582	CD74	-0.204909	7.02792	-1.14404	0.253584	0.439881	-5.79147
ENSG00000020577	SAMD4A	-0.37821	0.325836	-1.91598	0.0563855	0.169277	-4.45222
ENSG00000020633	RUNX3	0.528129	1.7453	3.28164	0.00116286	0.0138588	-1.21953
ENSG00000020922	MRE11	0.0101048	0.144424	0.08504	0.93229	0.961193	-6.16104
ENSG00000021355	SERPINB1	0.285337	5.88438	2.78048	0.0057958	0.0388915	-2.72425
ENSG00000021574	SPAST	0.114367	1.41287	1.23072	0.219461	0.401631	-5.62032
ENSG00000021762	OSBPL5	0.0615754	0.318971	0.345397	0.730055	0.843902	-6.12928
ENSG00000022277	RTF2	0.183988	3.53812	1.91371	0.056677	0.169841	-4.68753
ENSG00000022556	NLRP2	-0.0945531	0.258674	-0.529674	0.596758	0.753815	-6.04999
ENSG00000022567	SLC45A4	0.197941	2.73025	1.4477	0.148819	0.315533	-5.42769
ENSG00000022840	RNF10	0.172453	4.50551	1.85933	0.0640297	0.184463	-4.79059
ENSG00000023041	ZDHHC6	0.235241	1.01992	1.85227	0.0650389	0.185912	-4.64511
ENSG00000023171	GRAMD1B	0.14271	0.994155	0.87586	0.381857	0.572233	-5.91246
ENSG00000023191	RNH1	-0.196885	2.9523	-1.56087	0.119684	0.275596	-5.27122
ENSG00000023228	NDUFS1	-0.135667	1.03553	-1.24848	0.212898	0.394386	-5.56672
ENSG00000023287	RB1CC1	0.0259047	1.78442	0.260464	0.794697	0.882323	-6.36534
ENSG00000023318	ERP44	0.178742	0.937127	1.45829	0.145882	0.311885	-5.25584
ENSG00000023330	ALAS1	0.146205	1.9597	1.1947	0.233214	0.416804	-5.71004
ENSG00000023445	BIRC3	0.432804	2.12885	3.28721	0.00114094	0.0137472	-1.23278
ENSG00000023608	SNAPC1	0.163331	0.369082	1.03364	0.302196	0.4935	-5.69582
ENSG00000023697	DERA	-0.200965	0.198795	-1.47392	0.141627	0.306411	-5.13414
ENSG00000023734	STRAP	-0.112688	1.55893	-1.0549	0.292379	0.482161	-5.83929
ENSG00000023892	DEF6	0.509558	1.76608	3.96283	9.40619e-05	0.0026839	1.07082
ENSG00000023902	PLEKHO1	0.234305	2.49692	1.6886	0.0924086	0.234451	-5.04702
ENSG00000023909	GCLM	0.285407	1.81669	1.83427	0.067675	0.190941	-4.75847
ENSG00000024048	UBR2	0.248764	1.50515	2.4896	0.0133692	0.0667927	-3.3709
ENSG00000024862	CCDC28A	0.311025	0.454493	2.08871	0.0376372	0.131383	-4.10502
ENSG00000025039	RRAGD	-0.0186232	1.62566	-0.154558	0.877281	0.931804	-6.37488
ENSG00000025293	PHF20	-0.125361	2.58599	-1.16481	0.245088	0.430984	-5.78745
ENSG00000025434	NR1H3	-0.148174	2.26405	-0.842333	0.40032	0.588336	-6.08449
ENSG00000025708	TYMP	0.327046	6.38739	3.08378	0.00224801	0.020701	-1.87311
ENSG00000025770	NCAPH2	-0.182833	0.918855	-1.51662	0.130492	0.290625	-5.1989
ENSG00000025796	SEC63	-0.045394	1.88842	-0.381449	0.703159	0.828307	-6.33672
ENSG00000025800	KPNA6	0.00451101	0.707967	0.0400218	0.968104	0.982577	-6.26035
ENSG00000026025	VIM	-0.0636203	7.42964	-0.513212	0.608208	0.76173	-6.29394
ENSG00000026103	FAS	0.548348	2.50805	3.48892	0.000563088	0.00876374	-0.604018
ENSG00000026297	RNASET2	0.281036	3.8677	2.46759	0.0142008	0.0694346	-3.52145
ENSG00000026508	CD44	0.0994412	7.55334	0.86616	0.387144	0.57641	-6.0543
ENSG00000026652	AGPAT4	-0.0707796	1.00752	-0.526488	0.598966	0.754958	-6.17337
ENSG00000026751	SLAMF7	1.07633	4.27423	4.90973	1.5517e-06	0.000142756	4.84865
ENSG00000026950	BTN3A1	0.790573	1.90149	4.18706	3.78881e-05	0.00142901	1.91236
ENSG00000027075	PRKCH	-0.26467	4.04021	-1.63827	0.102488	0.250532	-5.16599
ENSG00000027697	IFNGR1	0.143964	4.22906	1.14228	0.254313	0.440826	-5.83693
ENSG00000027847	B4GALT7	-0.365095	-0.484927	-2.11154	0.0356114	0.127152	-3.96467
ENSG00000027869	SH2D2A	0.13903	-0.23556	0.719299	0.472557	0.649189	-5.82512
ENSG00000028116	VRK2	0.0920159	1.10782	0.798822	0.425071	0.61152	-5.99991
ENSG00000028137	TNFRSF1B	0.441663	5.79793	2.95649	0.00337671	0.0271571	-2.24507
ENSG00000028203	VEZT	-0.140057	1.21156	-1.20892	0.227713	0.41055	-5.6362
ENSG00000028277	POU2F2	0.158351	1.79571	0.890439	0.373995	0.564923	-6.00741
ENSG00000028310	BRD9	-0.30824	1.39074	-2.66331	0.00818577	0.0481654	-2.95582
ENSG00000028528	SNX1	0.063039	3.57271	0.529025	0.597207	0.754069	-6.33389
ENSG00000028839	TBPL1	0.492299	1.64049	2.35393	0.0192674	0.0838126	-3.67268
ENSG00000029153	ARNTL2	0.380986	0.532267	2.3774	0.0181071	0.0807275	-3.51369
ENSG00000029363	BCLAF1	-0.000663366	2.87586	-0.00713992	0.994308	0.997145	-6.45557
ENSG00000029364	SLC39A9	0.136471	0.712647	1.42629	0.154899	0.323329	-5.27206
ENSG00000029725	RABEP1	-0.0761309	1.46978	-0.673572	0.501139	0.675876	-6.14661
ENSG00000029993	HMGB3	-0.219914	1.509	-0.761901	0.44676	0.629441	-6.10095
ENSG00000030066	NUP160	-0.112506	1.31579	-0.889872	0.374299	0.565159	-5.97267
ENSG00000030110	BAK1	0.264392	0.395144	1.84694	0.0658108	0.187508	-4.55933
ENSG00000030582	GRN	0.026794	5.90755	0.201228	0.840666	0.910298	-6.43508
ENSG00000031003	FAM13B	-0.0297952	1.81347	-0.309951	0.756829	0.859509	-6.3555
ENSG00000031081	ARHGAP31	0.334675	0.983322	2.32928	0.0205554	0.0874071	-3.67963
ENSG00000031698	SARS1	-0.0272883	1.19344	-0.263464	0.792387	0.881303	-6.30224
ENSG00000031823	RANBP3	0.085458	2.06282	0.719612	0.472364	0.649189	-6.16113
ENSG00000032219	ARID4A	0.215695	1.7146	2.0524	0.0410605	0.138154	-4.34167
ENSG00000032389	EIPR1	0.129645	0.368687	0.93608	0.350039	0.542521	-5.78184
ENSG00000032444	PNPLA6	0.0140393	4.19766	0.113749	0.909518	0.94985	-6.46802
ENSG00000032742	IFT88	-0.101337	-0.350903	-0.692861	0.488971	0.664233	-5.84596
ENSG00000033030	ZCCHC8	-0.103006	0.145141	-1.06652	0.287107	0.475645	-5.62678
ENSG00000033050	ABCF2	-0.31878	-0.304081	-1.89346	0.0593269	0.17512	-4.40064
ENSG00000033100	CHPF2	0.126681	1.021	1.22679	0.220932	0.403127	-5.58095
ENSG00000033170	FUT8	-0.346995	0.188067	-1.86587	0.0631053	0.182547	-4.52612
ENSG00000033178	UBA6	0.15969	1.97713	1.21073	0.227021	0.409603	-5.69091
ENSG00000033327	GAB2	0.010019	3.47296	0.089539	0.928718	0.959217	-6.46664
ENSG00000033627	ATP6V0A1	-0.0926214	3.04071	-0.768999	0.442542	0.626007	-6.17369
ENSG00000033800	PIAS1	0.170955	2.79541	1.63861	0.102417	0.250483	-5.1438
ENSG00000033867	SLC4A7	-0.081616	0.0284398	-0.594727	0.552506	0.719142	-5.97514
ENSG00000034152	MAP2K3	0.0394672	4.92931	0.327423	0.743593	0.851254	-6.41598
ENSG00000034239	EFCAB1	-0.876484	-0.549144	-3.72807	0.00023347	0.00483125	0.369531
ENSG00000034510	TMSB10	0.0448213	6.89997	0.30106	0.763592	0.863483	-6.39146
ENSG00000034677	RNF19A	-0.0973741	2.72838	-0.952721	0.341553	0.53386	-6.00841
ENSG00000034713	GABARAPL2	0.17223	3.9246	1.43548	0.152267	0.320247	-5.46756
ENSG00000035115	SH3YL1	-0.24849	0.155701	-1.53674	0.125486	0.28352	-5.05759
ENSG00000035403	VCL	0.0269177	0.928565	0.207873	0.835479	0.90579	-6.27129
ENSG00000035664	DAPK2	0.105196	0.92989	0.608575	0.543299	0.712908	-6.12131
ENSG00000035681	NSMAF	0.239076	3.90395	1.70873	0.0886093	0.22846	-5.04975
ENSG00000035687	ADSS2	-0.06578	1.01618	-0.604087	0.546275	0.714747	-6.13407
ENSG00000035862	TIMP2	0.056085	2.99098	0.472023	0.637278	0.780367	-6.34859
ENSG00000035928	RFC1	-0.189976	1.52817	-1.4038	0.161486	0.332149	-5.41979
ENSG00000036054	TBC1D23	0.173666	1.08123	1.43069	0.153635	0.321578	-5.3191
ENSG00000036257	CUL3	-0.0287245	2.82704	-0.293823	0.769111	0.866468	-6.41347
ENSG00000036549	AC118549.1	-0.307292	-0.142869	-1.83194	0.0680229	0.19126	-4.52756
ENSG00000037241	RPL26L1	-0.270958	0.14472	-1.52262	0.128981	0.288894	-5.07339
ENSG00000037474	NSUN2	-0.141846	0.922557	-1.40942	0.15982	0.329825	-5.34499
ENSG00000037637	FBXO42	0.087964	0.0375031	0.792485	0.428749	0.614889	-5.83511
ENSG00000037749	MFAP3	0.0281304	1.07407	0.255701	0.79837	0.883547	-6.28741
ENSG00000037897	METTL1	-0.340032	-0.531937	-1.98557	0.0480568	0.153559	-4.1993
ENSG00000038210	PI4K2B	0.315834	0.526986	1.6473	0.100618	0.247249	-4.89786
ENSG00000038219	BOD1L1	0.273138	2.54767	2.32984	0.0205254	0.0873238	-3.80831
ENSG00000038274	MAT2B	0.370752	2.01214	3.13117	0.00192537	0.0187471	-1.69689
ENSG00000038358	EDC4	0.0691721	1.38738	0.596565	0.55128	0.718652	-6.18296
ENSG00000038382	TRIO	-0.223498	2.7265	-1.9093	0.0572458	0.171077	-4.68181
ENSG00000038427	VCAN	0.248572	4.3984	1.22993	0.219754	0.401944	-5.73466
ENSG00000038532	CLEC16A	-0.000743868	1.20014	-0.00728003	0.994197	0.997134	-6.33455
ENSG00000038945	MSR1	-1.06353	2.82079	-4.84978	2.05329e-06	0.000174246	4.59122
ENSG00000039068	CDH1	-0.380503	0.669619	-1.67161	0.0957179	0.239088	-4.93888
ENSG00000039123	MTREX	-0.0947986	0.887229	-0.747066	0.455651	0.63614	-6.0222
ENSG00000039319	ZFYVE16	0.168644	3.40673	1.18572	0.23674	0.420481	-5.78119
ENSG00000039523	RIPOR1	-0.118466	2.62266	-0.989718	0.323167	0.514849	-5.97229
ENSG00000039560	RAI14	-0.743356	-0.443293	-3.81341	0.00016863	0.00396834	0.654703
ENSG00000039650	PNKP	-0.173814	2.60889	-1.2115	0.226725	0.409218	-5.73112
ENSG00000040341	STAU2	-0.0537172	1.88762	-0.512306	0.608841	0.761985	-6.27845
ENSG00000040487	SLC66A1	-0.0570946	0.032855	-0.460418	0.645574	0.786426	-6.04951
ENSG00000040531	CTNS	0.0463055	1.4545	0.375011	0.707936	0.831578	-6.29379
ENSG00000040633	PHF23	0.0449679	2.1143	0.402044	0.687958	0.817533	-6.34381
ENSG00000040933	INPP4A	0.124463	1.97169	0.995619	0.320295	0.511841	-5.9228
ENSG00000041357	PSMA4	0.249057	3.17279	1.63864	0.102412	0.250483	-5.1483
ENSG00000041802	LSG1	-0.0836972	0.234953	-0.626729	0.531347	0.703319	-5.997
ENSG00000042062	RIPOR3	0.576651	0.517594	3.87955	0.000130516	0.00335456	0.855426
ENSG00000042088	TDP1	-0.0644834	0.0426248	-0.441536	0.659166	0.796566	-6.06545
ENSG00000042429	MED17	0.0537598	1.33547	0.699304	0.484943	0.661096	-6.11235
ENSG00000042445	RETSAT	0.0337298	0.63505	0.328507	0.742774	0.850712	-6.19972
ENSG00000042493	CAPG	-0.111937	4.31706	-0.903493	0.367041	0.558793	-6.07505
ENSG00000042753	AP2S1	-0.0232085	2.52069	-0.166505	0.867879	0.926716	-6.42883
ENSG00000042832	TG	-0.0212597	1.14292	-0.10566	0.915928	0.952101	-6.3295
ENSG00000042980	ADAM28	0.272393	0.67643	1.60705	0.10917	0.260589	-4.99318
ENSG00000043093	DCUN1D1	0.109411	1.12024	0.849619	0.396263	0.584216	-5.96789
ENSG00000043143	JADE2	-0.116818	0.628203	-0.822033	0.411758	0.599075	-5.92686
ENSG00000043462	LCP2	0.390863	7.0266	3.38303	0.000819199	0.0111538	-0.95073
ENSG00000044115	CTNNA1	-0.285511	4.10403	-3.07921	0.00228164	0.0208935	-1.90688
ENSG00000044446	PHKA2	0.00768146	1.08661	0.0523858	0.958259	0.97643	-6.3169
ENSG00000044574	HSPA5	-0.123579	3.97322	-0.940038	0.348008	0.54026	-6.0424
ENSG00000046651	OFD1	-0.0966041	0.177679	-0.758772	0.448627	0.630898	-5.90319
ENSG00000047056	WDR37	0.127401	1.40436	1.10212	0.271355	0.458738	-5.76499
ENSG00000047188	YTHDC2	0.248452	0.598141	2.132	0.0338773	0.122606	-4.04583
ENSG00000047249	ATP6V1H	0.021427	2.62297	0.190395	0.849137	0.915069	-6.42923
ENSG00000047315	POLR2B	0.0117315	1.3045	0.104201	0.917084	0.952196	-6.33913
ENSG00000047346	FAM214A	-0.0928671	0.952206	-0.759072	0.448448	0.630898	-6.03224
ENSG00000047365	ARAP2	0.496605	2.23102	3.30031	0.00109091	0.013258	-1.19458
ENSG00000047410	TPR	0.0471554	2.21111	0.452809	0.651037	0.789891	-6.32265
ENSG00000047457	CP	0.119952	0.584511	0.511228	0.609594	0.762373	-6.11206
ENSG00000047578	KIAA0556	-0.0711267	1.54455	-0.613526	0.540027	0.710224	-6.1963
ENSG00000047579	DTNBP1	0.432427	1.66601	3.47441	0.00059308	0.0090939	-0.611248
ENSG00000047621	C12orf4	-0.121039	0.640148	-0.7834	0.434054	0.619337	-5.96492
ENSG00000047644	WWC3	0.140668	0.70331	1.27653	0.202827	0.383229	-5.46738
ENSG00000047849	MAP4	-0.248931	1.71548	-2.53855	0.0116733	0.0607677	-3.28395
ENSG00000048052	HDAC9	-0.420326	-0.0120286	-2.35022	0.0194562	0.0842001	-3.53704
ENSG00000048342	CC2D2A	0.234181	3.41969	1.65928	0.0981783	0.242953	-5.12553
ENSG00000048392	RRM2B	0.130817	1.17494	0.959914	0.337927	0.530155	-5.87317
ENSG00000048405	ZNF800	0.0676745	0.84681	0.61844	0.536788	0.708142	-6.09686
ENSG00000048471	SNX29	-0.147244	1.09164	-1.16992	0.243026	0.428583	-5.66073
ENSG00000048649	RSF1	0.16334	2.21791	1.77385	0.0771752	0.208027	-4.8917
ENSG00000048707	VPS13D	0.0486079	2.09274	0.368533	0.712754	0.834628	-6.35459
ENSG00000048740	CELF2	0.321592	2.78792	3.19407	0.00156301	0.0164383	-1.54501
ENSG00000048828	FAM120A	0.00599643	2.57126	0.0611259	0.951303	0.971837	-6.44217
ENSG00000048991	R3HDM1	-0.100435	1.49246	-0.647278	0.517982	0.691017	-6.17089
ENSG00000049089	COL9A2	-0.282408	0.10512	-1.29945	0.194859	0.372175	-5.36036
ENSG00000049239	H6PD	0.188465	0.5363	2.08072	0.0383686	0.132811	-4.15229
ENSG00000049245	VAMP3	0.221901	3.4278	1.53256	0.126514	0.285382	-5.32181
ENSG00000049540	ELN	-0.645947	0.805289	-3.13574	0.00189667	0.0185965	-1.62208
ENSG00000049541	RFC2	0.159245	0.421408	1.15355	0.24967	0.435772	-5.56916
ENSG00000049618	ARID1B	-0.143397	2.03387	-1.56619	0.118433	0.27406	-5.22469
ENSG00000049656	CLPTM1L	-0.213954	3.05697	-2.06139	0.0401893	0.13614	-4.39781
ENSG00000049759	NEDD4L	-0.609523	1.27641	-3.19743	0.00154558	0.0163599	-1.48094
ENSG00000049860	HEXB	-0.158539	3.34131	-1.24176	0.215363	0.397266	-5.71569
ENSG00000050130	JKAMP	-0.0438643	0.857379	-0.332407	0.73983	0.849515	-6.22772
ENSG00000050327	ARHGEF5	-0.800689	-0.522597	-4.63551	5.46601e-06	0.000376276	3.75743
ENSG00000050344	NFE2L3	0.362667	1.8548	2.3007	0.0221438	0.091321	-3.83087
ENSG00000050405	LIMA1	-0.205791	0.0746059	-1.28148	0.201086	0.380891	-5.37765
ENSG00000050426	LETMD1	-0.253355	0.652022	-1.93292	0.0542546	0.165433	-4.47541
ENSG00000050438	SLC4A8	-0.44033	-0.0472869	-2.66956	0.0080387	0.0476131	-2.78733
ENSG00000050730	TNIP3	0.233386	3.26743	0.855403	0.393059	0.582388	-6.10487
ENSG00000050748	MAPK9	-0.288525	0.484463	-2.03275	0.0430214	0.142738	-4.26772
ENSG00000050820	BCAR1	-1.03842	-0.23991	-4.56236	7.57526e-06	0.000463173	3.45886
ENSG00000051009	FAM160A2	0.102811	1.69813	0.765073	0.444872	0.6275	-6.10341
ENSG00000051108	HERPUD1	0.0653472	3.33638	0.530316	0.596313	0.753662	-6.33054
ENSG00000051128	HOMER3	0.0728029	1.40547	0.523465	0.601065	0.756802	-6.22669
ENSG00000051382	PIK3CB	0.195731	1.53026	1.6708	0.095878	0.239364	-5.01252
ENSG00000051523	CYBA	0.161766	6.49389	1.40081	0.162379	0.333429	-5.48683
ENSG00000051596	THOC3	-0.388087	0.336392	-1.97308	0.0494703	0.156638	-4.35939
ENSG00000051620	HEBP2	0.117658	1.40869	0.798245	0.425405	0.611698	-6.04962
ENSG00000051825	MPHOSPH9	-0.271332	0.121695	-1.58177	0.114831	0.268951	-4.97292
ENSG00000052126	PLEKHA5	-0.611511	-0.131995	-3.52039	0.000502818	0.00813185	-0.343173
ENSG00000052344	PRSS8	-0.227099	-0.0573969	-1.2574	0.209658	0.39133	-5.39609
ENSG00000052723	SIKE1	0.188478	0.370162	1.1458	0.252856	0.439046	-5.56275
ENSG00000052749	RRP12	-0.21468	2.07922	-1.54842	0.12265	0.27988	-5.25387
ENSG00000052795	FNIP2	0.199855	3.12051	1.3128	0.190324	0.367146	-5.61854
ENSG00000052802	MSMO1	-0.0453673	0.00375346	-0.286233	0.774911	0.868719	-6.09947
ENSG00000052841	TTC17	0.0128879	1.45983	0.125762	0.900011	0.945338	-6.35301
ENSG00000053254	FOXN3	-0.269732	2.97911	-2.40712	0.0167261	0.0763999	-3.65456
ENSG00000053371	AKR7A2	-0.671555	-0.314055	-4.33798	2.00933e-05	0.000911512	2.57261
ENSG00000053501	USE1	-0.0120492	0.66495	-0.0870745	0.930675	0.960231	-6.25535
ENSG00000053524	MCF2L2	-0.160793	0.754596	-0.94226	0.346872	0.539015	-5.85998
ENSG00000053770	AP5M1	0.108469	0.691824	0.92007	0.358328	0.549522	-5.84635
ENSG00000053900	ANAPC4	-0.0562006	0.370293	-0.440518	0.659902	0.79706	-6.10447
ENSG00000053918	KCNQ1	0.0113732	0.709779	0.0809513	0.935538	0.96323	-6.25445
ENSG00000054116	TRAPPC3	0.137566	1.46641	1.13512	0.257297	0.443966	-5.73566
ENSG00000054118	THRAP3	0.057843	2.5547	0.635768	0.525447	0.697384	-6.24575
ENSG00000054148	PHPT1	-0.40713	0.479012	-1.94109	0.0532511	0.16407	-4.4471
ENSG00000054267	ARID4B	0.417943	3.36471	3.08066	0.00227088	0.0208337	-1.89375
ENSG00000054277	OPN3	-0.728293	0.268576	-4.57726	7.09054e-06	0.000447432	3.50917
ENSG00000054282	SDCCAG8	-0.263583	1.84259	-2.27184	0.0238546	0.0959088	-3.91235
ENSG00000054523	KIF1B	0.318621	2.48512	3.3252	0.0010014	0.0124625	-1.13164
ENSG00000054611	TBC1D22A	-0.0653901	1.38547	-0.709345	0.478701	0.655309	-6.1189
ENSG00000054654	SYNE2	-0.377679	2.44375	-2.84694	0.00474084	0.0341146	-2.53612
ENSG00000054965	FAM168A	0.40669	1.64822	3.22255	0.0014207	0.0156266	-1.39984
ENSG00000054967	RELT	0.159186	3.05773	1.1144	0.266062	0.453212	-5.85371
ENSG00000054983	GALC	0.142666	3.17756	1.2362	0.217419	0.40005	-5.71703
ENSG00000055044	NOP58	-0.15221	1.10504	-1.12731	0.260576	0.447347	-5.71719
ENSG00000055070	SZRD1	0.189878	2.5972	1.94396	0.0529023	0.163507	-4.60646
ENSG00000055130	CUL1	0.225282	1.44548	1.63624	0.102913	0.251177	-5.04387
ENSG00000055147	FAM114A2	0.134202	0.602943	0.975713	0.330049	0.52168	-5.78088
ENSG00000055163	CYFIP2	0.0457972	3.28001	0.32783	0.743285	0.8511	-6.41471
ENSG00000055208	TAB2	0.237849	3.17325	2.34264	0.0198483	0.0854002	-3.8015
ENSG00000055211	GINM1	-0.220596	0.0810137	-1.71633	0.0872085	0.226273	-4.75516
ENSG00000055332	EIF2AK2	0.723361	3.15917	3.82194	0.000163181	0.00392849	0.518763
ENSG00000055483	AC022966.1	0.0186941	2.20985	0.14671	0.883467	0.935802	-6.41857
ENSG00000055609	KMT2C	0.0988043	2.8623	1.11573	0.265493	0.452602	-5.8473
ENSG00000055917	PUM2	0.228475	2.30818	2.40203	0.0169559	0.0768317	-3.63519
ENSG00000055950	MRPL43	-0.204229	0.188432	-1.33116	0.184219	0.359806	-5.33838
ENSG00000055955	ITIH4	0.117435	0.502417	0.646716	0.518346	0.691128	-6.01346
ENSG00000056097	ZFR	-0.076462	1.59772	-0.871437	0.384262	0.574351	-6.01286
ENSG00000056558	TRAF1	0.511709	2.3875	2.45458	0.0147136	0.0708287	-3.51035
ENSG00000056586	RC3H2	-0.101268	1.61357	-0.85409	0.393785	0.582412	-6.02984
ENSG00000056972	TRAF3IP2	-0.212411	1.20018	-1.61835	0.106713	0.257031	-5.07967
ENSG00000057019	DCBLD2	-0.45148	-0.329089	-2.31827	0.0211551	0.0886549	-3.56434
ENSG00000057149	SERPINB3	0.287684	0.610904	0.917372	0.359737	0.550825	-5.82124
ENSG00000057252	SOAT1	-0.334973	2.0342	-2.17717	0.0303028	0.113164	-4.12419
ENSG00000057608	GDI2	0.0999463	3.32823	0.975842	0.329985	0.52168	-6.00039
ENSG00000057657	PRDM1	0.383673	2.31595	2.55718	0.0110799	0.0587662	-3.2581
ENSG00000057663	ATG5	0.0208523	0.512177	0.172105	0.86348	0.923923	-6.21348
ENSG00000057704	TMCC3	-0.120306	2.03589	-0.708029	0.479516	0.656152	-6.17342
ENSG00000057757	PITHD1	-0.251037	0.24327	-2.11114	0.0356463	0.127185	-4.0745
ENSG00000058063	ATP11B	0.31711	3.89654	2.62204	0.00921877	0.051869	-3.14549
ENSG00000058091	CDK14	0.139603	1.33207	1.013	0.311935	0.503474	-5.85219
ENSG00000058262	SEC61A1	0.0342353	2.37559	0.309669	0.757043	0.859653	-6.38693
ENSG00000058272	PPP1R12A	0.159357	3.94774	1.53113	0.126865	0.285781	-5.33008
ENSG00000058453	CROCC	-0.294011	1.47323	-1.92147	0.0556871	0.167794	-4.58937
ENSG00000058600	POLR3E	-0.178087	0.575657	-1.23149	0.219173	0.401631	-5.52214
ENSG00000058668	ATP2B4	0.0927778	1.75274	0.784318	0.433516	0.618729	-6.0875
ENSG00000058673	ZC3H11A	0.29344	2.52055	2.67459	0.00792215	0.0472419	-2.98313
ENSG00000058799	YIPF1	0.175786	1.42104	1.60114	0.110473	0.262301	-5.10518
ENSG00000059122	FLYWCH1	-0.31146	0.492285	-2.08041	0.038397	0.132811	-4.17743
ENSG00000059145	UNKL	0.0664786	1.45345	0.458541	0.646919	0.787373	-6.26263
ENSG00000059377	TBXAS1	0.195652	4.00709	1.56426	0.118885	0.274713	-5.28005
ENSG00000059378	PARP12	0.706452	3.4834	3.43638	0.000678982	0.00993149	-0.793434
ENSG00000059728	MXD1	0.437814	6.4013	3.47139	0.000599507	0.0091639	-0.676189
ENSG00000059758	CDK17	0.239613	2.31243	1.90757	0.0574701	0.171383	-4.65574
ENSG00000059804	SLC2A3	0.290044	6.23434	1.98023	0.0486563	0.154943	-4.54394
ENSG00000059915	PSD	-0.00976362	0.704633	-0.0581314	0.953685	0.973564	-6.27089
ENSG00000060069	CTDP1	-0.0968091	2.29538	-0.797584	0.425788	0.611981	-6.12236
ENSG00000060138	YBX3	-0.144662	3.74197	-1.19665	0.232453	0.416095	-5.77344
ENSG00000060237	WNK1	-0.0173498	3.77207	-0.216493	0.828761	0.901871	-6.45046
ENSG00000060339	CCAR1	-0.0440785	1.69152	-0.388587	0.697877	0.824025	-6.31818
ENSG00000060491	OGFR	0.336015	3.13014	2.54306	0.0115268	0.0601961	-3.32883
ENSG00000060558	GNA15	0.216131	2.56741	1.91439	0.0565888	0.169732	-4.6597
ENSG00000060642	PIGV	0.245797	-0.1562	1.48081	0.139781	0.304023	-5.03557
ENSG00000060656	PTPRU	-0.522681	-0.435025	-2.46125	0.0144486	0.0702035	-3.23741
ENSG00000060688	SNRNP40	-0.119346	0.135298	-0.770637	0.441572	0.625663	-5.88415
ENSG00000060762	MPC1	-0.272285	0.360028	-1.68162	0.0937581	0.236352	-4.86589
ENSG00000060971	ACAA1	-0.0336252	3.06438	-0.321862	0.747798	0.85408	-6.41276
ENSG00000060982	BCAT1	-0.074285	2.04223	-0.562465	0.57425	0.735673	-6.26207
ENSG00000061273	HDAC7	-0.00384358	2.52781	-0.0355661	0.971654	0.984709	-6.44245
ENSG00000061936	SFSWAP	0.0249047	1.57842	0.250928	0.802054	0.885732	-6.34426
ENSG00000061938	TNK2	0.39728	2.3758	2.718	0.00697748	0.0434448	-2.85907
ENSG00000061987	MON2	0.0323436	1.5775	0.306973	0.759092	0.860889	-6.3303
ENSG00000062038	CDH3	-0.274201	-0.564428	-1.47703	0.14079	0.305415	-5.01347
ENSG00000062194	GPBP1	0.263878	3.17591	2.28791	0.0228882	0.0932157	-3.92202
ENSG00000062282	DGAT2	0.293668	3.64213	1.57305	0.116837	0.272031	-5.26295
ENSG00000062485	CS	-0.228176	2.25999	-2.51932	0.012315	0.0630715	-3.36483
ENSG00000062582	MRPS24	-0.0207165	1.0794	-0.137257	0.890926	0.940179	-6.31995
ENSG00000062598	ELMO2	0.242629	2.36968	1.90079	0.058356	0.173326	-4.66894
ENSG00000062650	WAPL	0.143164	1.39386	1.44356	0.14998	0.317165	-5.3375
ENSG00000062716	VMP1	0.127402	5.47822	1.18048	0.238809	0.423002	-5.78207
ENSG00000062725	APPBP2	0.132274	0.680711	1.14766	0.252088	0.438204	-5.62195
ENSG00000062822	POLD1	0.017683	-0.042311	0.115995	0.90774	0.949	-6.11925
ENSG00000063015	SEZ6	0.202202	-0.162989	1.05166	0.293864	0.483826	-5.58112
ENSG00000063046	EIF4B	-0.177699	2.99418	-1.90528	0.0577684	0.172168	-4.69603
ENSG00000063169	BICRA	0.0829118	0.208557	0.642248	0.521238	0.693839	-5.97328
ENSG00000063177	RPL18	-0.0635426	4.35094	-0.504637	0.614211	0.764797	-6.34968
ENSG00000063241	ISOC2	-0.351631	0.286334	-2.03541	0.0427509	0.141984	-4.23652
ENSG00000063244	U2AF2	-0.089974	2.91482	-0.756995	0.44969	0.632031	-6.1779
ENSG00000063245	EPN1	0.0509095	2.21214	0.460868	0.645251	0.786426	-6.32195
ENSG00000063322	MED29	0.100764	1.56942	0.96742	0.334169	0.525909	-5.91814
ENSG00000063601	MTMR1	-0.00804768	0.732191	-0.0659317	0.947479	0.970232	-6.26311
ENSG00000063854	HAGH	-0.406199	0.952352	-3.20128	0.00152577	0.0162417	-1.43723
ENSG00000063978	RNF4	-0.243566	1.91616	-2.25029	0.0252065	0.0994521	-3.96034
ENSG00000064012	CASP8	0.115843	2.63091	1.00713	0.314743	0.506511	-5.94722
ENSG00000064115	TM7SF3	-0.0467091	1.45966	-0.310839	0.756154	0.85904	-6.32532
ENSG00000064225	ST3GAL6	0.275288	2.30282	1.89401	0.0592544	0.175008	-4.68263
ENSG00000064270	ATP2C2	-0.714821	0.722215	-3.34611	0.000931577	0.0120263	-0.985918
ENSG00000064313	TAF2	0.0316162	1.08171	0.282886	0.777473	0.870804	-6.27838
ENSG00000064393	HIPK2	-0.013336	1.54728	-0.113915	0.909387	0.94985	-6.3682
ENSG00000064419	TNPO3	0.297764	0.994447	2.86128	0.00453737	0.0331842	-2.37871
ENSG00000064490	RFXANK	0.274923	1.26444	1.93467	0.0540375	0.164924	-4.52361
ENSG00000064547	LPAR2	0.455398	3.10633	2.77106	0.00596157	0.0396112	-2.74908
ENSG00000064601	CTSA	0.26977	4.05495	2.063	0.0400349	0.13581	-4.40456
ENSG00000064607	SUGP2	0.013319	0.717782	0.121231	0.903595	0.947182	-6.25471
ENSG00000064666	CNN2	0.302018	5.24694	3.242	0.00133048	0.0150203	-1.41455
ENSG00000064687	ABCA7	0.130573	2.23531	1.03748	0.300406	0.491392	-5.9013
ENSG00000064726	BTBD1	-0.352913	1.73958	-2.26563	0.0242381	0.0971893	-3.91977
ENSG00000064763	FAR2	0.187491	2.01976	1.52143	0.12928	0.289095	-5.28028
ENSG00000064886	CHI3L2	-0.0294411	-0.00622531	-0.17987	0.857385	0.920202	-6.11834
ENSG00000064932	SBNO2	0.332517	5.20358	3.24433	0.00132004	0.0149534	-1.40789
ENSG00000064961	HMG20B	-0.0965107	0.998548	-0.791443	0.429355	0.615323	-6.01091
ENSG00000064995	TAF11	-0.124161	0.129922	-1.30529	0.192864	0.369896	-5.35235
ENSG00000064999	ANKS1A	-0.111896	0.907058	-1.24265	0.215037	0.396992	-5.55126
ENSG00000065000	AP3D1	-0.0183459	2.81747	-0.236597	0.813143	0.89277	-6.42754
ENSG00000065029	ZNF76	-0.260648	0.313455	-2.26174	0.0244802	0.0978137	-3.77607
ENSG00000065054	SLC9A3R2	-0.293229	0.115709	-1.38576	0.166922	0.338869	-5.26693
ENSG00000065135	GNAI3	0.2676	1.47276	2.5405	0.0116098	0.0605653	-3.24551
ENSG00000065150	IPO5	-0.498635	0.744269	-3.65894	0.000302568	0.00568068	0.0412392
ENSG00000065154	OAT	0.00011656	1.28798	0.000942548	0.999249	0.99935	-6.34658
ENSG00000065243	PKN2	0.0266666	1.52454	0.216184	0.829002	0.902033	-6.34277
ENSG00000065268	WDR18	-0.185796	-0.0466788	-1.07778	0.282061	0.469657	-5.59133
ENSG00000065357	DGKA	0.18624	3.31401	1.31687	0.188959	0.365865	-5.61842
ENSG00000065361	ERBB3	-0.411952	1.3255	-1.7331	0.0841791	0.221153	-4.9174
ENSG00000065413	ANKRD44	0.22575	3.21323	1.62194	0.105941	0.255923	-5.17966
ENSG00000065427	KARS1	0.283076	2.08495	2.0518	0.0411185	0.138241	-4.36493
ENSG00000065457	ADAT1	-0.00384448	2.06246	-0.0263251	0.979017	0.989369	-6.42
ENSG00000065518	NDUFB4	-0.0770737	1.97607	-0.498888	0.61825	0.7673	-6.2883
ENSG00000065526	SPEN	0.0631961	1.59214	0.667287	0.505139	0.679315	-6.15799
ENSG00000065548	ZC3H15	0.124514	1.73189	1.16101	0.246625	0.433113	-5.72795
ENSG00000065559	MAP2K4	0.0579787	1.28006	0.447553	0.654822	0.792972	-6.24248
ENSG00000065600	PACC1	-0.199817	-0.207247	-1.28555	0.199661	0.379067	-5.32209
ENSG00000065613	SLK	0.226864	2.21499	1.90057	0.0583856	0.173326	-4.66524
ENSG00000065615	CYB5R4	0.214909	3.01104	1.81624	0.0704031	0.195555	-4.85278
ENSG00000065621	GSTO2	0.054786	0.53628	0.366826	0.714026	0.835279	-6.17493
ENSG00000065665	SEC61A2	0.0430103	-0.158356	0.223232	0.823518	0.899247	-6.07463
ENSG00000065717	TLE2	-0.544821	-0.74969	-2.58009	0.0103873	0.0564308	-2.92113
ENSG00000065802	ASB1	0.0597685	0.199595	0.410762	0.681561	0.813181	-6.09644
ENSG00000065809	FAM107B	-0.058821	4.17239	-0.539302	0.590107	0.748391	-6.33221
ENSG00000065882	TBC1D1	-0.181001	2.90575	-2.06442	0.0398985	0.135669	-4.38772
ENSG00000065883	CDK13	-0.0194931	1.93583	-0.242645	0.808458	0.88981	-6.37981
ENSG00000065911	MTHFD2	0.450538	2.83561	3.5817	0.000402382	0.00692491	-0.309792
ENSG00000065923	SLC9A7	0.00294493	-0.429538	0.0172965	0.986212	0.992384	-6.04518
ENSG00000065970	FOXJ2	-0.123562	0.0236159	-1.19248	0.234084	0.417561	-5.47466
ENSG00000065978	YBX1	-0.24373	4.25367	-1.65467	0.0991126	0.244527	-5.13903
ENSG00000065989	PDE4A	0.12315	1.44889	1.0457	0.2966	0.487108	-5.82697
ENSG00000066027	PPP2R5A	0.161056	1.56941	1.40845	0.160108	0.330213	-5.40594
ENSG00000066044	ELAVL1	-0.31077	0.654827	-2.61432	0.00942434	0.0526385	-3.00932
ENSG00000066084	DIP2B	0.291386	2.20983	2.78369	0.00574043	0.0386784	-2.68181
ENSG00000066117	SMARCD1	-0.0742236	0.95915	-0.663771	0.507383	0.681588	-6.09404
ENSG00000066135	KDM4A	-0.310512	0.237262	-2.721	0.00691603	0.0432263	-2.67657
ENSG00000066136	NFYC	0.219778	2.5868	2.52525	0.0121137	0.0624331	-3.35663
ENSG00000066294	CD84	0.20371	1.29188	1.09558	0.274205	0.461572	-5.74408
ENSG00000066322	ELOVL1	0.210182	2.04824	1.9995	0.0465203	0.150294	-4.47019
ENSG00000066336	SPI1	0.310525	6.28399	3.25465	0.00127469	0.0147033	-1.36237
ENSG00000066379	ZNRD1	-0.0248216	-0.013505	-0.1593	0.873547	0.929442	-6.12587
ENSG00000066422	ZBTB11	0.150846	0.139923	1.44865	0.148554	0.315343	-5.14825
ENSG00000066427	ATXN3	-0.198901	1.41289	-1.50707	0.13292	0.294632	-5.26614
ENSG00000066455	GOLGA5	0.153848	0.42671	1.24755	0.213238	0.394718	-5.45278
ENSG00000066629	EML1	-0.357808	-0.235023	-1.91745	0.0561982	0.168921	-4.38186
ENSG00000066654	THUMPD1	-0.203548	0.394353	-1.82503	0.0690619	0.193468	-4.62388
ENSG00000066739	ATG2B	-0.140127	0.00340856	-0.935028	0.350579	0.542882	-5.71963
ENSG00000066777	ARFGEF1	0.197104	1.91631	2.08782	0.0377176	0.131545	-4.28954
ENSG00000066827	ZFAT	-0.207898	0.193366	-1.48498	0.138674	0.302886	-5.13098
ENSG00000066855	MTFR1	-0.284811	0.960221	-1.81767	0.0701835	0.195196	-4.72554
ENSG00000066923	STAG3	-0.0736224	1.21263	-0.545127	0.5861	0.744941	-6.20223
ENSG00000066933	MYO9A	-0.299044	0.498566	-1.96243	0.0507029	0.159135	-4.40489
ENSG00000067048	DDX3Y	0.150182	1.11367	0.919298	0.358731	0.549842	-5.86076
ENSG00000067057	PFKP	-0.174261	1.82744	-1.25666	0.209923	0.391531	-5.63765
ENSG00000067064	IDI1	0.489145	2.65178	3.33198	0.000978261	0.0122832	-1.1123
ENSG00000067066	SP100	0.552699	5.03203	5.11395	5.8594e-07	7.31188e-05	5.76666
ENSG00000067082	KLF6	0.168005	5.80545	1.63374	0.103438	0.252103	-5.15756
ENSG00000067167	TRAM1	-0.0164853	2.33772	-0.132776	0.894466	0.942125	-6.42409
ENSG00000067182	TNFRSF1A	0.372943	5.19605	3.81163	0.00016979	0.00396834	0.466938
ENSG00000067208	EVI5	-0.569362	1.05132	-3.61575	0.00035507	0.00633209	-0.129733
ENSG00000067225	PKM	0.00584479	5.59541	0.0596422	0.952483	0.972694	-6.45795
ENSG00000067334	DNTTIP2	0.17058	2.61966	1.35729	0.175783	0.349192	-5.54636
ENSG00000067365	METTL22	0.00381683	2.12323	0.0269724	0.978501	0.989152	-6.41991
ENSG00000067369	TP53BP1	-0.30027	1.35822	-2.5636	0.0108818	0.0582174	-3.20453
ENSG00000067560	RHOA	0.0343226	5.87214	0.392885	0.694703	0.821757	-6.37906
ENSG00000067596	DHX8	0.0108076	1.71264	0.103531	0.917616	0.952447	-6.38524
ENSG00000067606	PRKCZ	-0.676545	0.106897	-3.76018	0.000206713	0.00446361	0.430941
ENSG00000067704	IARS2	-0.366552	-0.0977188	-2.62609	0.00911252	0.0515499	-2.87588
ENSG00000067798	NAV3	-0.439153	-0.3111	-1.80333	0.0724112	0.199556	-4.56161
ENSG00000067829	IDH3G	0.0457946	1.55705	0.37262	0.709714	0.832708	-6.30118
ENSG00000067836	ROGDI	0.10872	0.451067	0.731576	0.465039	0.643629	-5.95791
ENSG00000067900	ROCK1	-0.0558291	2.8948	-0.585734	0.558526	0.723729	-6.28927
ENSG00000067955	CBFB	0.142109	2.31308	1.26629	0.206462	0.38794	-5.64784
ENSG00000068024	HDAC4	0.25239	3.60133	2.1591	0.0316917	0.116888	-4.20526
ENSG00000068028	RASSF1	-0.126659	-0.153674	-0.976017	0.329899	0.52168	-5.66333
ENSG00000068079	IFI35	0.802192	3.04628	4.051	6.60976e-05	0.00208211	1.35833
ENSG00000068097	HEATR6	-0.174367	0.806229	-1.32836	0.185142	0.360737	-5.43436
ENSG00000068120	COASY	-0.0680113	1.16871	-0.618438	0.536789	0.708142	-6.14357
ENSG00000068305	MEF2A	0.237061	2.6241	2.18122	0.0299992	0.112457	-4.13191
ENSG00000068308	OTUD5	0.316791	2.35383	3.10139	0.00212274	0.0199202	-1.8055
ENSG00000068323	TFE3	0.260503	3.33669	2.47709	0.0138362	0.06817	-3.4935
ENSG00000068366	ACSL4	0.0958489	3.18258	0.824368	0.410432	0.598167	-6.13092
ENSG00000068383	INPP5A	-0.0929055	1.64362	-0.608135	0.543591	0.712981	-6.21081
ENSG00000068400	GRIPAP1	0.229218	3.18401	2.13134	0.0339323	0.122715	-4.255
ENSG00000068438	FTSJ1	-0.238718	0.0570747	-1.56728	0.118178	0.273728	-4.99578
ENSG00000068650	ATP11A	0.10088	3.51764	0.988437	0.323792	0.515254	-5.99181
ENSG00000068654	POLR1A	-0.317949	-0.117237	-1.92334	0.055451	0.16739	-4.38014
ENSG00000068697	LAPTM4A	0.168773	3.05232	1.40001	0.162616	0.333736	-5.50202
ENSG00000068724	TTC7A	-0.0777346	1.54486	-0.687916	0.492075	0.667033	-6.14086
ENSG00000068745	IP6K2	0.0630562	2.20578	0.680676	0.496639	0.671554	-6.19871
ENSG00000068784	SRBD1	0.301437	0.881748	1.85327	0.0648961	0.18587	-4.61206
ENSG00000068796	KIF2A	-0.177068	0.801978	-1.30388	0.193347	0.370365	-5.46824
ENSG00000068831	RASGRP2	0.37934	2.4049	2.7522	0.00630617	0.0408408	-2.77504
ENSG00000068878	PSME4	-0.39255	1.22285	-3.44577	0.000656761	0.00966392	-0.696066
ENSG00000068885	IFT80	-0.577527	0.601054	-3.81653	0.000166616	0.00396834	0.596404
ENSG00000068903	SIRT2	-0.0310522	1.89301	-0.30652	0.759437	0.860889	-6.36164
ENSG00000068912	ERLEC1	-0.050976	0.67934	-0.385931	0.699841	0.825552	-6.18993
ENSG00000068971	PPP2R5B	-0.231682	0.193712	-1.70704	0.0889229	0.228792	-4.80324
ENSG00000068976	PYGM	0.102518	-0.157379	0.504609	0.61423	0.764797	-5.98671
ENSG00000069011	PITX1	-0.158175	-0.430236	-0.781842	0.434968	0.619746	-5.78229
ENSG00000069020	MAST4	-0.189858	0.38572	-1.05342	0.293056	0.482899	-5.68778
ENSG00000069248	NUP133	-0.209056	0.670892	-1.60018	0.110686	0.262616	-5.03826
ENSG00000069275	NUCKS1	-0.35267	0.418736	-2.03725	0.0425651	0.141739	-4.24827
ENSG00000069329	VPS35	0.135096	2.38654	1.44418	0.149807	0.316936	-5.41461
ENSG00000069345	DNAJA2	0.0188091	1.8329	0.253124	0.800358	0.884853	-6.36778
ENSG00000069399	BCL3	0.331332	5.4853	2.78846	0.0056589	0.0383652	-2.708
ENSG00000069424	KCNAB2	-0.0918509	3.30973	-0.730298	0.465819	0.644168	-6.20793
ENSG00000069493	CLEC2D	0.234003	1.22321	1.47607	0.141047	0.305669	-5.26828
ENSG00000069667	RORA	-0.573165	0.0869831	-3.49175	0.000557402	0.00874007	-0.453642
ENSG00000069849	ATP1B3	0.0800612	3.35722	0.597533	0.550634	0.717975	-6.29191
ENSG00000069869	NEDD4	-0.470985	3.43392	-1.96183	0.0507723	0.159223	-4.59914
ENSG00000069943	PIGB	0.108554	1.64961	0.754851	0.450973	0.633111	-6.10385
ENSG00000069956	MAPK6	-0.0820239	2.52948	-0.758982	0.448502	0.630898	-6.16526
ENSG00000069974	RAB27A	0.399986	3.18664	3.02157	0.00274716	0.0237428	-2.06178
ENSG00000070010	UFD1	0.0176837	1.73821	0.174359	0.86171	0.923133	-6.37916
ENSG00000070047	PHRF1	0.261835	0.923343	2.36074	0.0189237	0.082867	-3.60605
ENSG00000070081	NUCB2	-0.273914	2.24554	-1.8265	0.0688395	0.192954	-4.81391
ENSG00000070087	PFN2	-0.281315	0.466363	-1.59932	0.110878	0.262875	-5.0129
ENSG00000070190	DAPP1	0.647234	2.47035	3.77453	0.000195712	0.00431473	0.368667
ENSG00000070214	SLC44A1	-0.0424877	0.225311	-0.308132	0.758211	0.860582	-6.13233
ENSG00000070269	TMEM260	0.200849	1.43128	1.69964	0.0903097	0.231091	-4.95119
ENSG00000070366	SMG6	-0.192044	1.15538	-1.37532	0.170132	0.342982	-5.42679
ENSG00000070367	EXOC5	-0.136299	1.46192	-1.27067	0.204899	0.38596	-5.58373
ENSG00000070413	DGCR2	0.411788	1.57726	3.31545	0.00103563	0.0128397	-1.10856
ENSG00000070423	RNF126	-0.0448206	0.313702	-0.361098	0.718299	0.837987	-6.14313
ENSG00000070444	MNT	-0.0616777	2.24631	-0.482623	0.62974	0.775599	-6.31601
ENSG00000070476	ZXDC	0.0241678	0.863378	0.275236	0.783338	0.874541	-6.25085
ENSG00000070495	JMJD6	0.226304	2.96126	1.8945	0.0591893	0.174882	-4.71072
ENSG00000070501	POLB	-0.0718542	1.6739	-0.510878	0.609839	0.762427	-6.26246
ENSG00000070526	ST6GALNAC1	-0.171703	0.25936	-0.879654	0.379801	0.57002	-5.83239
ENSG00000070540	WIPI1	-0.10489	2.04851	-0.910872	0.363146	0.554492	-6.0108
ENSG00000070610	GBA2	0.119267	1.90559	1.26296	0.207655	0.388826	-5.62703
ENSG00000070614	NDST1	-0.0629758	1.87605	-0.50324	0.615191	0.765219	-6.28206
ENSG00000070669	ASNS	0.0868131	-0.279136	0.521685	0.602302	0.757321	-5.94188
ENSG00000070729	CNGB1	-0.241366	0.276746	-1.07502	0.283292	0.471377	-5.66361
ENSG00000070731	ST6GALNAC2	-0.0844816	1.38101	-0.605049	0.545636	0.71426	-6.17619
ENSG00000070756	PABPC1	-0.121719	5.07802	-1.35485	0.176558	0.350128	-5.57087
ENSG00000070761	CFAP20	-0.275753	-0.133512	-1.5288	0.127442	0.286489	-5.00701
ENSG00000070770	CSNK2A2	-0.14911	0.968918	-1.33618	0.182576	0.35781	-5.44673
ENSG00000070814	TCOF1	0.289877	0.495637	2.14785	0.0325837	0.119107	-4.00581
ENSG00000070831	CDC42	0.0311005	4.75046	0.445073	0.656611	0.794943	-6.37503
ENSG00000070882	OSBPL3	-0.00939332	1.27896	-0.0713243	0.943191	0.968171	-6.33934
ENSG00000070961	ATP2B1	-0.110587	3.92771	-0.68404	0.494516	0.669511	-6.24482
ENSG00000071051	NCK2	0.0752298	1.00723	0.642158	0.521296	0.693839	-6.10458
ENSG00000071054	MAP4K4	0.000466509	4.42467	0.00362185	0.997113	0.998262	-6.47355
ENSG00000071073	MGAT4A	0.309952	1.52525	2.14583	0.0327464	0.119657	-4.12799
ENSG00000071082	RPL31	-0.226145	4.54208	-1.56208	0.119399	0.275337	-5.2823
ENSG00000071127	WDR1	-0.0792375	5.35198	-1.15403	0.249474	0.43566	-5.81247
ENSG00000071189	SNX13	0.106033	1.93016	1.13535	0.257199	0.443876	-5.77677
ENSG00000071205	ARHGAP10	-0.356492	-0.141474	-2.53633	0.0117456	0.0610473	-3.09267
ENSG00000071243	ING3	0.143414	0.436485	1.10503	0.270095	0.457538	-5.60461
ENSG00000071246	VASH1	0.083677	0.595754	0.498623	0.618437	0.7673	-6.10641
ENSG00000071462	BUD23	-0.208645	1.26362	-1.61848	0.106685	0.257031	-5.08614
ENSG00000071537	SEL1L	-0.0128364	2.42314	-0.110362	0.912201	0.951139	-6.43063
ENSG00000071553	ATP6AP1	0.0447713	3.82002	0.362007	0.71762	0.837394	-6.40964
ENSG00000071564	TCF3	-0.0441108	1.33782	-0.29808	0.765863	0.864649	-6.31058
ENSG00000071575	TRIB2	0.142876	0.0175364	0.720139	0.47204	0.648899	-5.8823
ENSG00000071626	DAZAP1	0.00899041	1.98578	0.0743979	0.940747	0.966625	-6.40675
ENSG00000071655	MBD3	-0.271135	0.615406	-1.88238	0.0608213	0.178033	-4.56534
ENSG00000071859	FAM50A	0.012964	2.80469	0.109035	0.913253	0.951357	-6.45062
ENSG00000071889	FAM3A	-0.0724167	0.363185	-0.550141	0.582661	0.742104	-6.07813
ENSG00000071894	CPSF1	-0.0203622	1.24625	-0.168415	0.866378	0.925917	-6.3309
ENSG00000071994	PDCD2	-0.110897	0.298347	-0.80112	0.423741	0.610287	-5.89609
ENSG00000072042	RDH11	-0.0473847	0.366055	-0.346491	0.729234	0.843348	-6.14465
ENSG00000072062	PRKACA	0.06621	2.50013	0.671129	0.502691	0.677118	-6.21868
ENSG00000072071	ADGRL1	-0.242439	-0.00115456	-1.66133	0.0977658	0.242246	-4.84179
ENSG00000072080	SPP2	-0.688605	-0.373501	-2.43112	0.0156801	0.0730846	-3.31421
ENSG00000072110	ACTN1	0.0370757	4.86637	0.402007	0.687986	0.817533	-6.39163
ENSG00000072121	ZFYVE26	0.0125696	1.80151	0.10881	0.913431	0.951357	-6.38937
ENSG00000072134	EPN2	-0.604044	0.693101	-3.27007	0.00120965	0.0141692	-1.20629
ENSG00000072135	PTPN18	-0.0200546	2.04835	-0.181882	0.855807	0.919311	-6.40165
ENSG00000072210	ALDH3A2	-0.530474	1.0107	-3.90185	0.000119622	0.00316548	0.867993
ENSG00000072274	TFRC	-0.604829	3.86046	-4.04763	6.70026e-05	0.00209545	1.32355
ENSG00000072310	SREBF1	0.20404	2.80615	2.12653	0.0343334	0.123835	-4.25585
ENSG00000072364	AFF4	-0.0598494	2.92116	-0.745693	0.456478	0.636812	-6.18774
ENSG00000072401	UBE2D1	0.382063	3.01005	3.27753	0.00117926	0.0139527	-1.29612
ENSG00000072415	MPP5	0.133881	0.125043	1.03539	0.301378	0.492573	-5.64598
ENSG00000072501	SMC1A	0.151092	1.14833	1.12805	0.260262	0.44732	-5.69756
ENSG00000072506	HSD17B10	-0.0248827	0.338054	-0.153091	0.878437	0.932628	-6.19473
ENSG00000072518	MARK2	0.244957	3.10191	3.27581	0.00118622	0.0140182	-1.30553
ENSG00000072609	CHFR	0.147833	2.99017	1.66722	0.0965893	0.24035	-5.10304
ENSG00000072682	P4HA2	-0.892766	1.01145	-4.85786	1.97746e-06	0.000170756	4.66556
ENSG00000072694	FCGR2B	0.782547	2.22258	4.50486	9.76264e-06	0.000552318	3.15607
ENSG00000072736	NFATC3	0.230278	0.798456	2.31844	0.0211457	0.0886534	-3.68679
ENSG00000072756	TRNT1	0.0954025	0.698294	0.655675	0.512571	0.685471	-6.04983
ENSG00000072778	ACADVL	-0.158815	3.94174	-1.46383	0.144363	0.309826	-5.42836
ENSG00000072786	STK10	-0.000942166	4.79895	-0.00835045	0.993343	0.996685	-6.47094
ENSG00000072803	FBXW11	-0.0199658	1.77539	-0.170738	0.864553	0.924648	-6.38192
ENSG00000072818	ACAP1	0.247193	3.26025	1.93463	0.0540428	0.164924	-4.6416
ENSG00000072849	DERL2	0.056519	1.58431	0.463915	0.643069	0.78453	-6.26826
ENSG00000072858	SIDT1	-0.592435	-0.20676	-3.25342	0.00128004	0.0147033	-1.16254
ENSG00000072864	NDE1	0.0425267	2.37635	0.446814	0.655355	0.79352	-6.33714
ENSG00000072952	MRVI1	0.120473	0.716494	0.715983	0.474598	0.651415	-6.00869
ENSG00000072958	AP1M1	0.0542696	2.17931	0.47928	0.632114	0.777136	-6.30987
ENSG00000073008	PVR	-0.509951	-0.033532	-3.79518	0.000180852	0.0041021	0.568266
ENSG00000073050	XRCC1	0.15063	0.320081	1.11256	0.266852	0.453929	-5.59457
ENSG00000073060	SCARB1	-0.619775	0.0763545	-4.28083	2.56015e-05	0.00107701	2.33923
ENSG00000073169	SELENOO	0.0589565	0.237471	0.46508	0.642236	0.784172	-6.0676
ENSG00000073331	ALPK1	0.0430874	3.38552	0.298562	0.765496	0.864366	-6.4248
ENSG00000073350	LLGL2	-0.491733	0.76263	-2.53516	0.0117841	0.0611831	-3.22189
ENSG00000073417	PDE8A	-0.526652	1.07642	-3.81178	0.000169691	0.00396834	0.542993
ENSG00000073578	SDHA	-0.139322	1.89185	-1.3421	0.18065	0.355167	-5.52982
ENSG00000073584	SMARCE1	0.0399836	1.60614	0.387599	0.698607	0.824251	-6.30124
ENSG00000073614	KDM5A	-0.0710204	2.75959	-0.767827	0.443237	0.62627	-6.16403
ENSG00000073737	DHRS9	0.378665	1.31927	1.88398	0.0606037	0.17766	-4.61522
ENSG00000073756	PTGS2	-0.169261	5.12619	-0.611709	0.541226	0.711136	-6.28209
ENSG00000073792	IGF2BP2	-0.509645	0.962328	-2.85868	0.00457375	0.0333017	-2.40946
ENSG00000073803	MAP3K13	-0.227973	1.33753	-1.74306	0.0824206	0.217812	-4.89136
ENSG00000073849	ST6GAL1	-0.00597032	1.41286	-0.0430885	0.965662	0.980907	-6.36216
ENSG00000073910	FRY	-0.460185	0.535518	-3.52104	0.000501648	0.00813185	-0.395903
ENSG00000073921	PICALM	0.219362	5.58177	2.43264	0.0156159	0.0728889	-3.59396
ENSG00000073969	NSF	0.0916205	1.58554	0.803416	0.422416	0.609091	-6.05922
ENSG00000074054	CLASP1	0.129854	1.80085	1.16862	0.24355	0.429199	-5.72517
ENSG00000074071	MRPS34	-0.196528	-0.0187053	-1.0811	0.280582	0.468382	-5.58966
ENSG00000074201	CLNS1A	-0.259782	1.53498	-1.97485	0.0492674	0.156246	-4.49176
ENSG00000074319	TSG101	0.169787	2.37577	1.69074	0.0919999	0.233771	-5.04188
ENSG00000074356	NCBP3	-0.213179	0.944537	-1.8085	0.0716017	0.19788	-4.73126
ENSG00000074370	ATP2A3	0.280738	2.77853	2.01256	0.0451187	0.147069	-4.48167
ENSG00000074416	MGLL	-0.22733	2.37006	-1.19456	0.233268	0.416825	-5.747
ENSG00000074603	DPP8	0.161725	1.20019	1.49221	0.13677	0.30038	-5.24799
ENSG00000074621	SLC24A1	0.0489937	0.314797	0.316919	0.751541	0.856468	-6.14697
ENSG00000074657	ZNF532	-0.544394	0.420312	-2.89274	0.00411883	0.030951	-2.26831
ENSG00000074660	SCARF1	0.537359	2.86853	2.68482	0.00768964	0.0462196	-2.96677
ENSG00000074695	LMAN1	-0.370831	0.33699	-2.586	0.0102149	0.0558444	-3.03684
ENSG00000074696	HACD3	-0.583022	0.263765	-4.11302	5.13805e-05	0.00178505	1.69098
ENSG00000074706	IPCEF1	0.166679	1.11354	1.07744	0.282211	0.469826	-5.75489
ENSG00000074755	ZZEF1	0.0827367	2.01675	1.10613	0.26962	0.45719	-5.81419
ENSG00000074800	ENO1	0.00377451	5.11823	0.0358005	0.971467	0.984709	-6.46661
ENSG00000074842	MYDGF	-0.137869	1.90279	-0.913565	0.361731	0.55319	-6.00486
ENSG00000074935	TUBE1	-0.311713	0.491014	-1.7707	0.0776992	0.208981	-4.75295
ENSG00000074964	ARHGEF10L	-0.119188	1.81945	-0.843122	0.39988	0.587964	-6.0503
ENSG00000075089	ACTR6	-0.361203	0.468742	-2.22467	0.0269005	0.104091	-3.88091
ENSG00000075142	SRI	-0.113202	2.15762	-0.771529	0.441044	0.625145	-6.13443
ENSG00000075151	EIF4G3	0.345605	2.89359	3.176	0.00166008	0.0171119	-1.60243
ENSG00000075223	SEMA3C	-0.885486	0.988578	-5.64372	4.0753e-08	1.08425e-05	8.31034
ENSG00000075234	TTC38	-0.00913948	1.00744	-0.0527185	0.957994	0.97643	-6.29819
ENSG00000075239	ACAT1	-0.589234	1.33889	-4.34954	1.91268e-05	0.000888134	2.54071
ENSG00000075240	GRAMD4	0.0748667	1.40985	0.440172	0.660152	0.79706	-6.26047
ENSG00000075275	CELSR1	-0.556578	-0.393866	-3.00281	0.00291659	0.0247508	-1.86636
ENSG00000075292	ZNF638	0.154058	3.69646	1.47489	0.141367	0.306088	-5.41053
ENSG00000075303	SLC25A40	0.387656	0.964104	2.44056	0.0152845	0.0721636	-3.42882
ENSG00000075399	VPS9D1	0.294857	3.61178	1.93258	0.0542965	0.165478	-4.65226
ENSG00000075407	ZNF37A	-0.126691	-0.0193309	-0.938323	0.348887	0.541113	-5.71983
ENSG00000075413	MARK3	0.0669485	3.4787	0.839984	0.401634	0.589574	-6.12476
ENSG00000075415	SLC25A3	-0.0766226	3.26865	-0.747177	0.455584	0.636137	-6.19373
ENSG00000075420	FNDC3B	0.162179	5.34001	1.71115	0.0881613	0.227964	-5.03805
ENSG00000075426	FOSL2	0.146344	5.45064	1.31885	0.188296	0.365133	-5.61346
ENSG00000075539	FRYL	0.034049	2.21789	0.349231	0.727179	0.842765	-6.36524
ENSG00000075568	TMEM131	0.160513	1.4571	1.54571	0.123303	0.280323	-5.19135
ENSG00000075624	ACTB	0.338223	10.0733	3.03734	0.00261184	0.0229562	-1.95185
ENSG00000075651	PLD1	-0.113506	2.36713	-0.682998	0.495173	0.670032	-6.21153
ENSG00000075711	DLG1	-0.203476	1.12939	-1.75659	0.0800809	0.213462	-4.84174
ENSG00000075785	RAB7A	0.109467	5.02648	1.39852	0.163064	0.334314	-5.51458
ENSG00000075790	BCAP29	-0.2422	0.546966	-1.57714	0.115892	0.270663	-5.04445
ENSG00000075856	SART3	-0.0848647	1.38029	-0.784588	0.433359	0.618729	-6.06047
ENSG00000075884	ARHGAP15	0.131812	3.69681	0.837298	0.403139	0.590737	-6.12906
ENSG00000075914	EXOSC7	-0.302548	-0.308352	-1.84381	0.0662673	0.188319	-4.48898
ENSG00000076043	REXO2	-0.519392	-0.135014	-3.1431	0.00185118	0.0183861	-1.49925
ENSG00000076053	RBM7	0.32923	1.74541	2.81886	0.00516321	0.0359731	-2.55626
ENSG00000076067	RBMS2	-0.43582	0.394799	-2.36846	0.0185415	0.0815421	-3.55
ENSG00000076108	BAZ2A	0.113351	3.67985	1.24173	0.215374	0.397266	-5.7186
ENSG00000076201	PTPN23	-0.00819782	1.1994	-0.0692363	0.944851	0.969169	-6.34208
ENSG00000076242	MLH1	-0.0233337	1.30735	-0.212558	0.831827	0.903492	-6.32812
ENSG00000076382	SPAG5	-0.27049	0.131647	-1.6501	0.100044	0.246207	-4.87943
ENSG00000076513	ANKRD13A	0.286595	2.99192	2.98051	0.00313037	0.0257869	-2.17578
ENSG00000076554	TPD52	-0.285317	0.0788735	-1.41567	0.157982	0.327761	-5.22336
ENSG00000076555	ACACB	-0.325165	1.16967	-1.9388	0.0535307	0.164373	-4.53416
ENSG00000076604	TRAF4	-0.124421	1.04383	-0.698409	0.485501	0.661308	-6.08652
ENSG00000076641	PAG1	0.300611	3.58005	2.13635	0.0335176	0.12167	-4.25205
ENSG00000076662	ICAM3	0.645047	3.67579	3.96177	9.4456e-05	0.00268548	1.00972
ENSG00000076685	NT5C2	0.349955	4.23313	3.25865	0.00125752	0.0145979	-1.36891
ENSG00000076924	XAB2	0.269758	0.764015	2.66596	0.00812314	0.0479115	-2.86223
ENSG00000076928	ARHGEF1	0.316716	4.25276	3.03589	0.00262398	0.0229808	-2.03196
ENSG00000076944	STXBP2	0.463286	6.56082	3.76535	0.000202685	0.00440447	0.318492
ENSG00000076984	MAP2K7	-0.230722	0.614144	-1.92176	0.0556513	0.167789	-4.49305
ENSG00000077044	DGKD	0.0492917	2.70239	0.353228	0.724183	0.841091	-6.38923
ENSG00000077097	TOP2B	0.0222187	1.18188	0.213806	0.830854	0.902951	-6.30981
ENSG00000077147	TM9SF3	0.182817	2.20163	1.78169	0.0758835	0.205955	-4.87925
ENSG00000077150	NFKB2	0.192605	5.03217	1.47947	0.140139	0.304465	-5.401
ENSG00000077157	PPP1R12B	-0.457628	0.510778	-2.82599	0.00505283	0.035656	-2.44772
ENSG00000077232	DNAJC10	-0.167593	0.736427	-1.16125	0.24653	0.433055	-5.63103
ENSG00000077235	GTF3C1	-0.188322	0.961168	-1.55182	0.121836	0.278789	-5.14893
ENSG00000077238	IL4R	0.0617519	5.65206	0.488026	0.625913	0.772504	-6.34302
ENSG00000077254	USP33	-0.108652	2.32304	-0.965786	0.334985	0.526855	-5.98023
ENSG00000077312	SNRPA	-0.109518	1.01116	-0.805117	0.421435	0.608379	-6.00199
ENSG00000077327	SPAG6	-0.820268	-0.64575	-3.80482	0.000174286	0.00400873	0.636902
ENSG00000077380	DYNC1I2	-0.214628	2.05553	-1.80412	0.072287	0.199326	-4.83704
ENSG00000077420	APBB1IP	0.431819	3.73358	3.21701	0.00144741	0.0157266	-1.49294
ENSG00000077454	LRCH4	0.168791	3.32735	1.5509	0.122055	0.279032	-5.29355
ENSG00000077458	FAM76B	0.0313046	1.36027	0.215366	0.829639	0.902159	-6.31907
ENSG00000077463	SIRT6	-0.0428273	1.26963	-0.338641	0.735134	0.846531	-6.29366
ENSG00000077514	POLD3	3.04641e-05	1.09417	0.000274001	0.999782	0.999782	-6.31544
ENSG00000077549	CAPZB	0.228573	4.4638	3.25422	0.00127654	0.0147033	-1.38238
ENSG00000077585	GPR137B	-0.0116211	2.75598	-0.0894071	0.928822	0.959224	-6.44531
ENSG00000077684	JADE1	-0.104692	0.0626829	-0.787692	0.431543	0.617279	-5.85668
ENSG00000077721	UBE2A	0.135568	2.46991	1.32741	0.185456	0.36101	-5.57892
ENSG00000077782	FGFR1	-0.555004	0.279225	-2.69595	0.00744368	0.0454	-2.77318
ENSG00000077984	CST7	0.752919	4.3499	3.50866	0.000524546	0.00838252	-0.572169
ENSG00000078043	PIAS2	-0.523615	0.0993551	-3.13651	0.00189182	0.0185965	-1.54396
ENSG00000078061	ARAF	0.148422	1.78386	1.45847	0.145833	0.311885	-5.35377
ENSG00000078070	MCCC1	-0.387576	-0.0474751	-2.20944	0.0279534	0.107113	-3.82966
ENSG00000078081	LAMP3	0.623405	1.41107	2.57513	0.0105337	0.0570684	-3.12961
ENSG00000078098	FAP	0.808405	0.203946	2.71392	0.00706159	0.0438576	-2.6218
ENSG00000078114	NEBL	-0.65944	-0.271879	-2.9179	0.00380974	0.0294142	-2.11294
ENSG00000078124	ACER3	0.0855426	1.62014	0.622791	0.533929	0.705408	-6.18533
ENSG00000078140	UBE2K	0.150082	2.01569	1.2105	0.227108	0.409686	-5.69209
ENSG00000078142	PIK3C3	-0.0180383	1.70495	-0.167513	0.867087	0.926264	-6.37333
ENSG00000078269	SYNJ2	-0.171903	0.518477	-1.35922	0.175169	0.348522	-5.36788
ENSG00000078304	PPP2R5C	-0.0283631	4.03951	-0.333341	0.739126	0.849102	-6.42055
ENSG00000078369	GNB1	0.1377	4.94843	1.91796	0.0561326	0.168775	-4.67971
ENSG00000078401	EDN1	0.00392773	0.665465	0.01733	0.986186	0.992384	-6.27334
ENSG00000078403	MLLT10	-0.26555	1.34262	-1.86262	0.0635628	0.183493	-4.68269
ENSG00000078487	ZCWPW1	0.226264	1.47861	1.43631	0.15203	0.319923	-5.36142
ENSG00000078618	NRDC	0.0390155	4.02768	0.498848	0.618278	0.7673	-6.35286
ENSG00000078668	VDAC3	0.229916	1.25739	1.79315	0.0740273	0.202423	-4.77603
ENSG00000078674	PCM1	-0.0722954	2.79017	-0.657167	0.511614	0.684748	-6.24469
ENSG00000078687	TNRC6C	0.26475	0.165545	1.90417	0.0579129	0.172494	-4.41789
ENSG00000078699	CBFA2T2	-0.0513376	0.156568	-0.437624	0.661996	0.798375	-6.07865
ENSG00000078747	ITCH	0.0738532	2.48382	0.753948	0.451514	0.633224	-6.16075
ENSG00000078804	TP53INP2	0.00228261	1.97082	0.0164804	0.986863	0.992712	-6.41137
ENSG00000078808	SDF4	-0.0337732	3.15211	-0.359428	0.719545	0.838315	-6.40094
ENSG00000078814	MYH7B	-0.00187595	-0.21582	-0.0130169	0.989624	0.99427	-6.0917
ENSG00000078902	TOLLIP	-0.0395817	2.55013	-0.357225	0.721193	0.83987	-6.38423
ENSG00000078967	UBE2D4	-0.726006	0.54756	-2.88521	0.00421572	0.0313678	-2.30662
ENSG00000079134	THOC1	-0.294165	0.203775	-1.91202	0.0568938	0.170387	-4.43852
ENSG00000079215	SLC1A3	-0.152146	2.38065	-0.945185	0.345379	0.537706	-5.99497
ENSG00000079246	XRCC5	-0.0360876	2.93759	-0.397522	0.691285	0.819646	-6.38109
ENSG00000079263	SP140	0.392389	3.11876	2.06091	0.0402348	0.136201	-4.39157
ENSG00000079277	MKNK1	-0.127116	4.4686	-1.07944	0.281321	0.469059	-5.90382
ENSG00000079308	TNS1	-0.381372	2.14154	-2.34101	0.0199333	0.0856397	-3.77559
ENSG00000079313	REXO1	-0.16141	1.5955	-0.930381	0.352975	0.545101	-5.966
ENSG00000079332	SAR1A	0.0371777	2.2625	0.408921	0.682911	0.813871	-6.34856
ENSG00000079335	CDC14A	-0.0235152	0.354807	-0.212118	0.832169	0.903582	-6.18963
ENSG00000079385	CEACAM1	0.73768	3.63209	4.53103	8.70093e-06	0.000514183	3.23333
ENSG00000079387	SENP1	0.123869	0.762518	1.02908	0.30433	0.495697	-5.75406
ENSG00000079432	CIC	-0.0588162	2.4175	-0.514971	0.606979	0.760772	-6.30856
ENSG00000079459	FDFT1	-0.0147848	1.84607	-0.137891	0.890426	0.940179	-6.39225
ENSG00000079739	PGM1	-0.212505	0.30048	-1.49171	0.136902	0.30042	-5.14365
ENSG00000079785	DDX1	-0.389503	0.197398	-2.71173	0.00710727	0.0440579	-2.70279
ENSG00000079805	DNM2	-0.123677	4.59978	-1.37546	0.170087	0.342961	-5.54866
ENSG00000079819	EPB41L2	-0.53241	0.267634	-3.42564	0.000705259	0.0101174	-0.675904
ENSG00000079950	STX7	0.151374	2.58527	1.35954	0.175068	0.348437	-5.54082
ENSG00000079974	RABL2B	-0.529421	0.747414	-3.35774	0.000894715	0.0117851	-0.944231
ENSG00000079999	KEAP1	0.0325778	1.34723	0.266568	0.789998	0.879622	-6.31743
ENSG00000080189	SLC35C2	0.181155	1.21712	1.76448	0.0787421	0.211163	-4.82788
ENSG00000080298	RFX3	-0.244538	0.65454	-1.54336	0.123874	0.2811	-5.11671
ENSG00000080345	RIF1	0.155739	0.862293	1.49539	0.135938	0.299101	-5.19819
ENSG00000080371	RAB21	0.0494242	3.144	0.407209	0.684166	0.814667	-6.38287
ENSG00000080503	SMARCA2	-0.410952	3.21649	-2.3836	0.0178109	0.0796955	-3.71296
ENSG00000080603	SRCAP	-0.0683109	1.73955	-0.684326	0.494335	0.66945	-6.16521
ENSG00000080608	PUM3	-0.450289	-0.051749	-2.80497	0.00538461	0.0370155	-2.42549
ENSG00000080802	CNOT4	0.159666	0.946974	1.71172	0.0880554	0.227773	-4.87321
ENSG00000080815	PSEN1	0.202453	4.12425	2.26448	0.0243092	0.097395	-3.98472
ENSG00000080822	CLDND1	0.242741	2.1443	2.00377	0.0460576	0.149289	-4.46483
ENSG00000080823	MOK	-0.779157	1.07774	-4.18148	3.87742e-05	0.0014513	1.89572
ENSG00000080824	HSP90AA1	-0.21967	5.24402	-1.44915	0.148414	0.315225	-5.43861
ENSG00000080845	DLGAP4	-0.0602837	2.35026	-0.615845	0.538497	0.709085	-6.25031
ENSG00000081019	RSBN1	0.10271	0.684575	0.695434	0.48736	0.663106	-6.00865
ENSG00000081041	CXCL2	-0.361952	4.69321	-1.71988	0.08656	0.225184	-5.02654
ENSG00000081059	TCF7	0.295956	0.446857	1.93691	0.0537626	0.164684	-4.40003
ENSG00000081087	OSTM1	0.0393414	2.57953	0.373318	0.709194	0.832396	-6.37697
ENSG00000081154	PCNP	0.149491	2.13327	1.1919	0.23431	0.417691	-5.72328
ENSG00000081189	MEF2C	-0.147015	1.68353	-0.66856	0.504327	0.678501	-6.16931
ENSG00000081237	PTPRC	0.329459	6.5504	2.37037	0.0184476	0.0814346	-3.72308
ENSG00000081307	UBA5	-0.508137	-0.074445	-3.11579	0.00202509	0.0193473	-1.57995
ENSG00000081320	STK17B	0.276889	3.94848	2.07993	0.0384416	0.132833	-4.36981
ENSG00000081665	ZNF506	-0.120307	0.913514	-0.948639	0.343622	0.536242	-5.86906
ENSG00000081760	AACS	-0.529026	1.20414	-3.16672	0.00171201	0.0174102	-1.56355
ENSG00000081791	DELE1	-0.00653171	1.33372	-0.0638933	0.949101	0.970875	-6.35041
ENSG00000081870	HSPB11	-0.397738	-0.159883	-2.32981	0.0205269	0.0873238	-3.55737
ENSG00000081913	PHLPP1	-0.184913	0.957067	-1.31644	0.189104	0.365868	-5.47478
ENSG00000081923	ATP8B1	-0.348118	-0.272838	-1.89979	0.0584885	0.173579	-4.39971
ENSG00000082014	SMARCD3	0.548249	1.25743	2.97171	0.00321865	0.0261855	-2.08896
ENSG00000082068	WDR70	0.174161	0.281236	1.23712	0.217078	0.399819	-5.44336
ENSG00000082074	FYB1	0.629442	5.00051	4.56608	7.45119e-06	0.000458434	3.37371
ENSG00000082153	BZW1	0.092039	3.80962	0.962133	0.336813	0.529038	-6.02007
ENSG00000082212	ME2	0.0362407	1.81036	0.377463	0.706115	0.830642	-6.32512
ENSG00000082213	C5orf22	-0.115693	0.094357	-0.83707	0.403267	0.590826	-5.82823
ENSG00000082258	CCNT2	0.0610756	1.53565	0.529868	0.596623	0.753803	-6.23317
ENSG00000082397	EPB41L3	-0.191903	2.77718	-1.50379	0.133763	0.29605	-5.35243
ENSG00000082515	MRPL22	0.251092	-0.217794	1.42778	0.154471	0.322864	-5.09892
ENSG00000082641	NFE2L1	-0.0482871	2.50684	-0.398518	0.690552	0.819411	-6.36399
ENSG00000082701	GSK3B	0.145133	1.6811	1.46743	0.143382	0.309055	-5.3341
ENSG00000082781	ITGB5	-0.794879	0.138356	-4.3288	2.0895e-05	0.000934954	2.51864
ENSG00000082805	ERC1	-0.00731454	1.70815	-0.0571166	0.954493	0.97399	-6.39006
ENSG00000082898	XPO1	-0.0174097	2.85533	-0.169701	0.865368	0.925285	-6.44265
ENSG00000082996	RNF13	0.245377	4.74725	2.3932	0.0173607	0.0782502	-3.69498
ENSG00000083099	LYRM2	-0.222545	0.370075	-1.71409	0.0876193	0.22704	-4.80779
ENSG00000083168	KAT6A	0.169424	2.89624	1.87032	0.0624831	0.18147	-4.75255
ENSG00000083223	TUT7	0.0456915	3.41625	0.389284	0.697362	0.823615	-6.39458
ENSG00000083290	ULK2	-0.332729	0.360724	-1.8335	0.0677898	0.19121	-4.60884
ENSG00000083312	TNPO1	0.0305568	2.48708	0.339283	0.734651	0.846411	-6.38371
ENSG00000083444	PLOD1	-0.179014	1.40349	-1.48405	0.138919	0.303018	-5.29723
ENSG00000083457	ITGAE	-0.33196	0.792922	-2.47	0.0141076	0.069161	-3.37425
ENSG00000083520	DIS3	0.0857264	0.267043	0.790992	0.429618	0.615419	-5.8761
ENSG00000083535	PIBF1	0.0565949	-0.176342	0.361683	0.717862	0.837577	-6.02679
ENSG00000083642	PDS5B	0.112505	0.949026	1.14749	0.252158	0.438248	-5.6511
ENSG00000083799	CYLD	0.351393	3.03741	3.39575	0.000783494	0.0108173	-0.926426
ENSG00000083828	ZNF586	-0.109372	0.93553	-0.99921	0.318556	0.510311	-5.82485
ENSG00000083844	ZNF264	-0.158295	0.748276	-1.22771	0.220587	0.40276	-5.55299
ENSG00000083845	RPS5	-0.157226	3.63722	-1.01365	0.311625	0.503222	-5.97055
ENSG00000083857	FAT1	-0.158255	-0.148955	-0.877183	0.381139	0.571331	-5.76142
ENSG00000083896	YTHDC1	0.102149	2.82493	1.03554	0.301311	0.492544	-5.92959
ENSG00000083937	CHMP2B	0.379914	2.29709	3.69694	0.000262511	0.00519951	0.0965923
ENSG00000084070	SMAP2	0.0836078	4.23856	0.540165	0.589513	0.74783	-6.33211
ENSG00000084072	PPIE	-0.577854	-0.077359	-3.84243	0.000150763	0.00370772	0.734579
ENSG00000084073	ZMPSTE24	0.0344495	1.04993	0.30524	0.76041	0.861687	-6.26756
ENSG00000084090	STARD7	-0.246606	1.38158	-2.04314	0.0419742	0.140187	-4.3506
ENSG00000084093	REST	0.0491799	0.891193	0.474326	0.635637	0.779482	-6.18298
ENSG00000084110	HAL	-0.0689942	1.5964	-0.332807	0.739529	0.849367	-6.33033
ENSG00000084112	SSH1	0.17563	2.00495	1.30137	0.1942	0.371278	-5.58429
ENSG00000084207	GSTP1	-0.133062	3.63277	-0.595857	0.551752	0.718921	-6.29789
ENSG00000084234	APLP2	-0.247434	5.14951	-2.66125	0.00823467	0.0483376	-3.03998
ENSG00000084463	WBP11	-0.173258	0.846009	-1.55345	0.121446	0.278351	-5.1294
ENSG00000084623	EIF3I	-0.136744	2.11506	-1.17319	0.241716	0.427004	-5.75223
ENSG00000084652	TXLNA	0.23085	0.616776	1.956	0.0514593	0.160519	-4.40116
ENSG00000084676	NCOA1	0.148821	2.48132	1.22555	0.221398	0.40357	-5.70526
ENSG00000084733	RAB10	0.0514713	4.02023	0.532587	0.594742	0.752235	-6.33582
ENSG00000084754	HADHA	-0.0568464	2.22952	-0.700538	0.484173	0.660678	-6.18772
ENSG00000084764	MAPRE3	-0.746919	-0.0965864	-4.60177	6.35716e-06	0.000417199	3.61882
ENSG00000084774	CAD	-0.615692	-0.143725	-3.80989	0.000170924	0.00396834	0.625592
ENSG00000085063	CD59	-0.0326043	3.52023	-0.256851	0.797482	0.882989	-6.43868
ENSG00000085117	CD82	0.0404958	5.10305	0.303569	0.761682	0.862433	-6.42178
ENSG00000085224	ATRX	0.0467482	2.40382	0.384245	0.701089	0.826628	-6.3634
ENSG00000085231	AK6	-0.441881	0.640003	-2.85225	0.00466447	0.0337626	-2.39696
ENSG00000085265	FCN1	0.511703	1.97566	3.38087	0.0008254	0.0112072	-0.927147
ENSG00000085276	MECOM	-0.335058	-0.259909	-1.56042	0.119791	0.275683	-4.95617
ENSG00000085365	SCAMP1	-0.0992298	0.33669	-0.838495	0.402468	0.590359	-5.86419
ENSG00000085415	SEH1L	-0.297344	0.200776	-2.41991	0.0161613	0.0745638	-3.4082
ENSG00000085433	WDR47	0.024823	0.336536	0.18467	0.853621	0.917683	-6.18504
ENSG00000085449	WDFY1	0.122845	2.7139	0.981338	0.327273	0.518955	-5.97695
ENSG00000085491	SLC25A24	-0.00826691	1.12108	-0.0678962	0.945917	0.969632	-6.31581
ENSG00000085511	MAP3K4	-0.372768	0.0536143	-2.45556	0.0146745	0.0708088	-3.30773
ENSG00000085514	PILRA	0.0876748	4.42165	0.691887	0.489582	0.664751	-6.23971
ENSG00000085662	AKR1B1	-0.772553	1.05026	-4.48594	1.06067e-05	0.000586586	3.09873
ENSG00000085719	CPNE3	-0.166649	1.37151	-1.14151	0.254632	0.441147	-5.7266
ENSG00000085721	RRN3	-0.0468008	0.24442	-0.349029	0.72733	0.84283	-6.12677
ENSG00000085733	CTTN	-0.333525	0.530615	-1.55511	0.121049	0.277699	-5.09631
ENSG00000085788	DDHD2	-0.206662	0.188951	-1.26657	0.206362	0.387899	-5.42065
ENSG00000085831	TTC39A	-0.0249712	-0.347709	-0.137089	0.891059	0.940179	-6.05841
ENSG00000085832	EPS15	0.100399	2.08211	1.14945	0.251351	0.437549	-5.77159
ENSG00000085871	MGST2	-0.359746	0.0305151	-2.18544	0.0296851	0.111538	-3.89401
ENSG00000085872	CHERP	-0.0706113	0.937407	-0.767851	0.443223	0.62627	-6.02318
ENSG00000085978	ATG16L1	-0.121271	0.735329	-0.86756	0.386378	0.576027	-5.90697
ENSG00000085982	USP40	-0.299199	0.0536742	-1.55719	0.120554	0.276886	-5.01269
ENSG00000085998	POMGNT1	-0.517151	-0.299583	-2.99667	0.00297408	0.0250016	-1.89282
ENSG00000086015	MAST2	-0.365428	0.241048	-2.77709	0.00585493	0.0391017	-2.54247
ENSG00000086061	DNAJA1	0.252115	4.22025	2.31263	0.0214682	0.0894722	-3.87903
ENSG00000086062	B4GALT1	0.200943	3.19901	1.91635	0.0563384	0.169239	-4.67629
ENSG00000086065	CHMP5	0.435704	2.49296	3.52787	0.000489423	0.00800312	-0.477337
ENSG00000086102	NFX1	-0.19114	1.00513	-1.91009	0.0571435	0.170823	-4.56167
ENSG00000086200	IPO11	0.276701	1.75651	1.52459	0.128489	0.288121	-5.25414
ENSG00000086232	EIF2AK1	-0.0163014	1.07799	-0.142368	0.886892	0.93798	-6.30571
ENSG00000086300	SNX10	0.142171	4.41115	1.02767	0.304991	0.4965	-5.95801
ENSG00000086504	MRPL28	0.0203357	1.10803	0.178497	0.858462	0.921057	-6.30547
ENSG00000086544	ITPKC	-0.237798	0.949976	-1.56427	0.118883	0.274713	-5.13435
ENSG00000086548	CEACAM6	0.159795	1.36482	0.626482	0.531509	0.703344	-6.15824
ENSG00000086589	RBM22	0.136914	1.88587	1.49177	0.136886	0.30042	-5.31757
ENSG00000086598	TMED2	0.0161217	2.67665	0.124749	0.900812	0.945675	-6.44126
ENSG00000086619	ERO1B	0.12731	0.148989	0.928071	0.35417	0.546245	-5.74019
ENSG00000086666	ZFAND6	0.14404	3.17466	1.49551	0.135908	0.299101	-5.37317
ENSG00000086730	LAT2	0.431093	3.75407	3.93211	0.000106209	0.00289618	0.898832
ENSG00000086758	HUWE1	-0.0548724	2.39329	-0.59519	0.552197	0.719025	-6.26408
ENSG00000086848	ALG9	-0.777847	0.499241	-4.8629	1.9316e-06	0.000169774	4.70523
ENSG00000087008	ACOX3	0.0764474	0.392752	0.624014	0.533127	0.704632	-6.02365
ENSG00000087074	PPP1R15A	0.163542	6.49393	1.19552	0.232894	0.416535	-5.74556
ENSG00000087077	TRIP6	-0.156357	0.392987	-1.08921	0.276998	0.465011	-5.64971
ENSG00000087086	FTL	-0.170815	9.61954	-1.35918	0.175182	0.348522	-5.47885
ENSG00000087087	SRRT	-0.0780802	2.52781	-0.770931	0.441398	0.625557	-6.15316
ENSG00000087088	BAX	-0.0235026	2.56966	-0.180869	0.856601	0.919662	-6.43022
ENSG00000087111	PIGS	0.123716	0.957437	1.07035	0.285383	0.473746	-5.74028
ENSG00000087152	ATXN7L3	0.0919483	2.68982	1.0137	0.311602	0.503222	-5.94676
ENSG00000087157	PGS1	0.345408	4.42446	2.64071	0.00873782	0.0503897	-3.0994
ENSG00000087191	PSMC5	-0.103995	1.87526	-0.949567	0.343151	0.535847	-5.96744
ENSG00000087206	UIMC1	-0.0905522	2.06252	-0.758026	0.449073	0.631434	-6.13861
ENSG00000087237	CETP	0.558825	-0.151455	3.5135	0.00051547	0.0082778	-0.326301
ENSG00000087253	LPCAT2	0.514873	2.85763	3.5198	0.000503904	0.00813185	-0.51491
ENSG00000087263	OGFOD1	-0.243966	0.0212816	-1.72042	0.0864617	0.224988	-4.74119
ENSG00000087266	SH3BP2	0.172048	5.02346	1.41334	0.158665	0.328269	-5.49443
ENSG00000087274	ADD1	0.0328482	3.39346	0.42243	0.673036	0.806643	-6.38142
ENSG00000087302	RTRAF	-0.114725	1.81864	-0.922753	0.35693	0.548575	-5.98634
ENSG00000087338	GMCL1	0.158976	1.00528	1.2138	0.225846	0.408307	-5.58845
ENSG00000087365	SF3B2	-0.0665003	3.07688	-0.851983	0.394952	0.583049	-6.10737
ENSG00000087460	GNAS	0.00232767	5.05694	0.025331	0.979809	0.989458	-6.46833
ENSG00000087470	DNM1L	-0.138083	1.5287	-1.22263	0.222496	0.404546	-5.64757
ENSG00000087502	ERGIC2	0.115689	1.56528	0.797923	0.425591	0.611787	-6.06046
ENSG00000087589	CASS4	0.0835171	0.605563	0.403064	0.687209	0.81729	-6.16021
ENSG00000087884	AAMDC	-0.26786	0.438559	-1.39613	0.163781	0.33519	-5.29589
ENSG00000087903	RFX2	-0.130493	2.92029	-1.00122	0.317584	0.509252	-5.96949
ENSG00000088038	CNOT3	0.29237	2.04256	2.60064	0.00979926	0.0541628	-3.14457
ENSG00000088205	DDX18	-0.125008	1.32005	-1.24379	0.214615	0.3963	-5.60775
ENSG00000088247	KHSRP	-0.0568965	2.59531	-0.459192	0.646453	0.78701	-6.34316
ENSG00000088256	GNA11	-0.445361	0.455705	-2.21334	0.0276807	0.106483	-3.89904
ENSG00000088280	ASAP3	-0.475372	0.468163	-2.52175	0.0122323	0.062847	-3.21814
ENSG00000088298	EDEM2	0.155108	1.48309	1.26371	0.207386	0.388489	-5.58497
ENSG00000088367	EPB41L1	-1.14827	-0.543116	-5.40628	1.37922e-07	2.82855e-05	7.1323
ENSG00000088387	DOCK9	-0.360417	-0.0849414	-1.91225	0.056865	0.170353	-4.40374
ENSG00000088448	ANKRD10	0.322445	4.75773	1.84008	0.0668153	0.189275	-4.82439
ENSG00000088682	COQ9	-0.100804	0.0146224	-0.650597	0.51584	0.688921	-5.94167
ENSG00000088727	KIF9	-0.534557	-0.525903	-3.15633	0.00177202	0.0178544	-1.42285
ENSG00000088766	CRLS1	-0.473773	0.125449	-3.07516	0.00231175	0.0210712	-1.71776
ENSG00000088808	PPP1R13B	-0.554218	-0.0245151	-3.34348	0.000940108	0.0120657	-0.912107
ENSG00000088826	SMOX	-0.107813	0.334768	-0.666128	0.505878	0.680216	-6.00425
ENSG00000088827	SIGLEC1	0.618429	1.49155	2.06163	0.0401657	0.13614	-4.25778
ENSG00000088832	FKBP1A	0.168721	4.70513	1.88478	0.0604957	0.177608	-4.7432
ENSG00000088833	NSFL1C	-0.110847	2.57823	-1.2217	0.222848	0.405044	-5.71836
ENSG00000088836	SLC4A11	-0.406276	-0.292393	-1.54669	0.123068	0.280176	-4.97825
ENSG00000088930	XRN2	0.31767	1.94129	2.68916	0.00759285	0.0459398	-2.90903
ENSG00000088986	DYNLL1	-0.290774	3.31237	-1.70772	0.088796	0.228585	-5.04787
ENSG00000088992	TESC	0.742419	0.434364	3.62164	0.000347441	0.00625266	-0.0131154
ENSG00000089006	SNX5	-0.233611	1.95324	-2.43138	0.0156689	0.073067	-3.5577
ENSG00000089009	RPL6	-0.143719	4.10125	-1.10422	0.270445	0.457971	-5.87873
ENSG00000089022	MAPKAPK5	-0.241626	0.380632	-1.97933	0.0487579	0.15518	-4.34171
ENSG00000089041	P2RX7	0.246062	1.88468	1.39825	0.163144	0.334373	-5.44229
ENSG00000089053	ANAPC5	-0.136466	1.9104	-1.4312	0.153488	0.321408	-5.41352
ENSG00000089057	SLC23A2	0.242924	0.481068	1.7898	0.0745667	0.20294	-4.67254
ENSG00000089060	SLC8B1	-0.173762	2.08448	-1.75012	0.0811924	0.215629	-4.93003
ENSG00000089063	TMEM230	-0.232425	1.28702	-2.11292	0.0354925	0.126866	-4.20055
ENSG00000089094	KDM2B	-0.162125	0.744155	-1.30999	0.191274	0.368402	-5.44695
ENSG00000089101	CFAP61	-0.856583	-0.966273	-3.81388	0.000168321	0.00396834	0.674852
ENSG00000089127	OAS1	0.971937	3.68864	3.46597	0.000611226	0.00928535	-0.694442
ENSG00000089154	GCN1	-0.193653	1.27726	-1.25317	0.21119	0.392478	-5.58843
ENSG00000089157	RPLP0	-0.216183	4.12269	-1.40978	0.159714	0.329677	-5.50411
ENSG00000089159	PXN	0.243462	4.255	1.91946	0.0559427	0.168358	-4.68066
ENSG00000089220	PEBP1	-0.475931	1.46285	-3.84518	0.00014917	0.00368951	0.639396
ENSG00000089248	ERP29	-0.0883625	1.45627	-0.711886	0.477128	0.653884	-6.1164
ENSG00000089280	FUS	-0.0359052	4.12389	-0.462662	0.643966	0.785331	-6.3701
ENSG00000089289	IGBP1	0.28329	0.71455	2.45543	0.0146797	0.0708088	-3.35842
ENSG00000089327	FXYD5	0.184979	3.42955	1.4637	0.144398	0.309826	-5.42205
ENSG00000089335	ZNF302	-0.274036	-0.321728	-1.55753	0.120473	0.276765	-4.94402
ENSG00000089351	GRAMD1A	0.137943	5.66154	0.852414	0.394713	0.582979	-6.10363
ENSG00000089356	FXYD3	-0.322212	0.776545	-1.16759	0.243967	0.429549	-5.64088
ENSG00000089486	CDIP1	-0.280336	0.405034	-1.78608	0.0751682	0.204351	-4.70171
ENSG00000089505	CMTM1	0.670617	1.20388	3.48059	0.000580135	0.00895117	-0.548595
ENSG00000089597	GANAB	-0.154808	2.28121	-1.57714	0.115892	0.270663	-5.22163
ENSG00000089639	GMIP	0.328288	3.88921	2.84929	0.00470684	0.0340192	-2.55204
ENSG00000089692	LAG3	0.771937	0.00885746	2.90284	0.00399212	0.0302995	-2.11956
ENSG00000089693	MLF2	0.116809	2.95882	1.23782	0.216822	0.399624	-5.71013
ENSG00000089737	DDX24	-0.255996	1.7701	-2.32533	0.0207691	0.0876718	-3.78912
ENSG00000089775	ZBTB25	-0.0193226	0.0775096	-0.159308	0.873541	0.929442	-6.14467
ENSG00000089818	NECAP1	0.272926	2.55779	2.5551	0.0111446	0.0589193	-3.28366
ENSG00000089820	ARHGAP4	0.384556	3.29592	3.16972	0.00169507	0.0173205	-1.63
ENSG00000089876	DHX32	-0.496749	-0.355621	-2.74054	0.00652826	0.0417943	-2.5618
ENSG00000089902	RCOR1	0.052812	1.7414	0.457358	0.647768	0.787862	-6.28503
ENSG00000089916	GPATCH2L	0.0689563	2.17097	0.682149	0.495709	0.670573	-6.1959
ENSG00000090006	LTBP4	-0.194601	0.922092	-0.99459	0.320795	0.512314	-5.82808
ENSG00000090013	BLVRB	-0.156142	2.15812	-1.05766	0.29112	0.480571	-5.88077
ENSG00000090020	SLC9A1	0.191254	1.30393	1.84982	0.0653932	0.186859	-4.68604
ENSG00000090054	SPTLC1	-0.178714	2.23642	-1.6061	0.109379	0.260926	-5.17593
ENSG00000090060	PAPOLA	0.00968898	3.85023	0.126641	0.899315	0.945112	-6.46624
ENSG00000090061	CCNK	0.130621	2.13623	1.42609	0.154957	0.323366	-5.42701
ENSG00000090104	RGS1	0.0455055	2.71876	0.234509	0.814761	0.893748	-6.42042
ENSG00000090238	YPEL3	0.340956	3.69605	2.25825	0.0246999	0.0983028	-3.99484
ENSG00000090263	MRPS33	-0.516272	-0.381902	-2.85376	0.00464308	0.0336572	-2.26398
ENSG00000090266	NDUFB2	-0.305521	2.46781	-2.27287	0.0237917	0.095868	-3.93989
ENSG00000090273	NUDC	-0.474199	1.52393	-3.44973	0.000647574	0.00960048	-0.706672
ENSG00000090316	MAEA	-0.0315347	3.59425	-0.254209	0.799521	0.88437	-6.44003
ENSG00000090339	ICAM1	0.401127	5.1541	3.30768	0.00106366	0.0130709	-1.21288
ENSG00000090372	STRN4	-0.0916042	2.9229	-0.948034	0.34393	0.536552	-6.01974
ENSG00000090376	IRAK3	0.22625	4.4109	1.33546	0.182811	0.358127	-5.60247
ENSG00000090382	LYZ	-0.195533	6.12108	-1.3557	0.176286	0.349729	-5.55293
ENSG00000090432	MUL1	0.0532608	-0.117681	0.42357	0.672205	0.806384	-6.01567
ENSG00000090487	SPG21	0.126574	2.94329	1.4516	0.147731	0.3143	-5.42998
ENSG00000090520	DNAJB11	-0.0417231	1.79354	-0.335431	0.737551	0.847899	-6.34333
ENSG00000090581	GNPTG	0.00188767	2.2609	0.0159939	0.987251	0.992898	-6.43142
ENSG00000090615	GOLGA3	-0.210696	1.3536	-1.70135	0.089987	0.230685	-4.96432
ENSG00000090621	PABPC4	-0.269879	2.69005	-2.17001	0.030847	0.114545	-4.16751
ENSG00000090661	CERS4	-0.399086	0.86753	-2.68984	0.00757783	0.0458771	-2.84891
ENSG00000090674	MCOLN1	-0.207724	3.51822	-1.85837	0.0641661	0.184639	-4.79048
ENSG00000090686	USP48	-0.103404	1.51879	-0.946877	0.344518	0.537044	-5.93788
ENSG00000090857	PDPR	-0.0462152	0.672883	-0.434514	0.66425	0.800059	-6.17162
ENSG00000090861	AARS1	-0.294508	0.858803	-2.20002	0.0286226	0.109125	-3.97826
ENSG00000090863	GLG1	0.0872492	2.07264	0.958753	0.33851	0.530705	-5.96593
ENSG00000090905	TNRC6A	-0.03033	1.04092	-0.210552	0.83339	0.904435	-6.2933
ENSG00000090924	PLEKHG2	0.444663	3.63677	2.66418	0.00816507	0.0480723	-3.03324
ENSG00000090989	EXOC1	0.211093	1.13766	1.83697	0.0672745	0.190083	-4.68297
ENSG00000091039	OSBPL8	0.160579	3.51327	1.53834	0.125094	0.282995	-5.31545
ENSG00000091073	DTX2	-0.053019	3.36676	-0.58201	0.561028	0.72582	-6.30347
ENSG00000091106	NLRC4	0.597869	1.58182	3.73912	0.000223919	0.00470996	0.290286
ENSG00000091136	LAMB1	-0.62025	0.381691	-3.69264	0.000266775	0.00522095	0.181224
ENSG00000091140	DLD	-0.214277	1.72221	-1.79747	0.0733382	0.200986	-4.82881
ENSG00000091157	WDR7	0.114583	0.815936	0.822762	0.411343	0.598763	-5.93938
ENSG00000091164	TXNL1	0.0427533	1.33001	0.396517	0.692026	0.819983	-6.27434
ENSG00000091317	CMTM6	0.196222	4.13045	1.91698	0.0562583	0.16905	-4.68567
ENSG00000091409	ITGA6	-0.191769	-0.221156	-1.14934	0.251396	0.437549	-5.47816
ENSG00000091436	MAP3K20	0.305937	1.73609	2.40509	0.0168174	0.0764722	-3.58743
ENSG00000091483	FH	-0.483975	-0.379862	-2.9281	0.00369066	0.0288111	-2.06499
ENSG00000091490	SEL1L3	-0.000492244	1.63333	-0.00404301	0.996777	0.998262	-6.38145
ENSG00000091527	CDV3	-0.0797828	3.0237	-0.770202	0.44183	0.625719	-6.17083
ENSG00000091542	ALKBH5	-0.16443	1.1261	-1.33654	0.182458	0.35765	-5.47124
ENSG00000091592	NLRP1	-0.134178	1.62688	-1.0089	0.313892	0.505803	-5.88638
ENSG00000091640	SPAG7	-0.182574	2.30933	-1.77456	0.0770564	0.207934	-4.90567
ENSG00000091651	ORC6	-0.437071	2.07789	-2.90854	0.00392218	0.0299671	-2.35516
ENSG00000092010	PSME1	0.436975	4.00271	3.77807	0.000193091	0.00429072	0.345433
ENSG00000092020	PPP2R3C	0.225381	2.21132	1.93516	0.053978	0.164924	-4.60221
ENSG00000092036	HAUS4	0.366901	2.12104	2.55411	0.0111758	0.0590522	-3.25717
ENSG00000092068	SLC7A8	-1.1058	-0.0111431	-5.83364	1.49465e-08	7.04311e-06	9.22592
ENSG00000092094	OSGEP	-0.355236	0.597058	-3.4353	0.00068159	0.00994011	-0.676609
ENSG00000092098	RNF31	0.340239	2.34196	3.03936	0.00259489	0.0228276	-1.98434
ENSG00000092108	SCFD1	-0.0420238	2.05901	-0.377375	0.706181	0.830642	-6.34804
ENSG00000092140	G2E3	-0.138516	1.0253	-0.756668	0.449885	0.632177	-6.04082
ENSG00000092148	HECTD1	-0.112452	2.17764	-1.06075	0.28972	0.479086	-5.87909
ENSG00000092199	HNRNPC	0.0632666	5.43965	0.821326	0.412159	0.599388	-6.13281
ENSG00000092201	SUPT16H	-0.153918	0.819191	-1.50385	0.133747	0.29605	-5.20028
ENSG00000092203	TOX4	0.0582264	2.33977	0.615879	0.538475	0.709085	-6.24623
ENSG00000092208	GEMIN2	-0.337875	-0.416273	-1.77184	0.0775085	0.208639	-4.58841
ENSG00000092330	TINF2	0.16685	2.52778	1.83771	0.0671644	0.189881	-4.79828
ENSG00000092439	TRPM7	-0.0347958	1.37194	-0.304684	0.760834	0.861969	-6.31288
ENSG00000092529	CAPN3	0.148836	0.453998	1.23357	0.218396	0.40122	-5.47712
ENSG00000092531	SNAP23	0.226242	3.28605	2.45571	0.0146685	0.0708088	-3.54336
ENSG00000092621	PHGDH	-0.305247	-0.442936	-1.5329	0.126431	0.285258	-4.96337
ENSG00000092820	EZR	-0.019589	3.93976	-0.135366	0.89242	0.940778	-6.46497
ENSG00000092841	MYL6	-0.0965568	6.75163	-1.04427	0.297262	0.487951	-5.90363
ENSG00000092847	AGO1	0.0905255	0.0114464	0.843389	0.399731	0.587832	-5.78996
ENSG00000092871	RFFL	0.166153	2.65797	1.5221	0.129113	0.288992	-5.31797
ENSG00000092929	UNC13D	0.137362	4.09582	1.07226	0.284526	0.472913	-5.91214
ENSG00000092931	MFSD11	-0.0701297	1.47686	-0.730007	0.465996	0.644233	-6.11388
ENSG00000092964	DPYSL2	-0.439036	1.67907	-3.6445	0.000319254	0.00589631	-0.064933
ENSG00000093000	NUP50	0.0758038	2.5389	0.888838	0.374853	0.565291	-6.05634
ENSG00000093010	COMT	-0.314332	2.13113	-2.15395	0.0320975	0.117855	-4.17762
ENSG00000093072	ADA2	-0.0943311	2.56622	-0.727263	0.467673	0.645328	-6.18094
ENSG00000093134	VNN3	0.0114612	3.17288	0.0636369	0.949305	0.970904	-6.46338
ENSG00000093144	ECHDC1	-0.252434	1.69399	-2.0334	0.042955	0.142565	-4.3959
ENSG00000093167	LRRFIP2	-0.032057	2.63246	-0.338974	0.734884	0.846429	-6.39092
ENSG00000093183	SEC22C	-0.14831	0.832429	-1.16654	0.244389	0.430216	-5.6337
ENSG00000094631	HDAC6	-0.273669	2.10856	-2.32689	0.0206843	0.0875732	-3.80431
ENSG00000094755	GABRP	-0.234468	0.903415	-0.887356	0.375649	0.565848	-5.93432
ENSG00000094916	CBX5	-0.197538	0.123743	-1.96235	0.0507119	0.159135	-4.33869
ENSG00000094975	SUCO	0.24421	1.32048	1.94053	0.0533189	0.164125	-4.52187
ENSG00000095015	MAP3K1	0.511967	1.62587	3.93134	0.000106534	0.00289703	0.966731
ENSG00000095059	DHPS	-0.126481	0.875665	-1.00406	0.316216	0.507886	-5.81374
ENSG00000095066	HOOK2	-0.122491	1.58393	-0.708067	0.479492	0.656152	-6.14352
ENSG00000095139	ARCN1	0.0947061	2.03496	0.959658	0.338055	0.530166	-5.96233
ENSG00000095209	TMEM38B	-0.0227552	0.569877	-0.144931	0.88487	0.936831	-6.23833
ENSG00000095261	PSMD5	-0.182407	0.366744	-1.18664	0.236376	0.420358	-5.5444
ENSG00000095319	NUP188	-0.422723	1.00549	-3.06966	0.00235332	0.0212533	-1.82931
ENSG00000095370	SH2D3C	0.517565	2.19542	3.50485	0.000531773	0.00847051	-0.541514
ENSG00000095380	NANS	-0.179483	2.43671	-2.00982	0.0454094	0.147604	-4.47867
ENSG00000095383	TBC1D2	0.300771	2.98641	1.93917	0.0534845	0.164373	-4.62896
ENSG00000095397	WHRN	-0.0752828	1.06105	-0.455488	0.649111	0.788881	-6.22601
ENSG00000095485	CWF19L1	-0.269741	0.480608	-2.34414	0.0197704	0.0852233	-3.61381
ENSG00000095564	BTAF1	-0.00768918	0.673638	-0.0670188	0.946615	0.9699	-6.25158
ENSG00000095787	WAC	0.254379	3.85564	2.76758	0.00602391	0.0397265	-2.77108
ENSG00000095794	CREM	0.32204	4.74939	2.63525	0.00887601	0.0507618	-3.11244
ENSG00000095906	NUBP2	-0.146555	0.299478	-1.17665	0.240334	0.425282	-5.54684
ENSG00000095951	HIVEP1	0.121102	3.43163	1.04327	0.297723	0.488275	-5.93632
ENSG00000096060	FKBP5	0.0431685	2.90444	0.212883	0.831573	0.90335	-6.43277
ENSG00000096063	SRPK1	0.128121	3.16333	0.964634	0.335561	0.527593	-6.00896
ENSG00000096070	BRPF3	0.00382498	0.989149	0.0314266	0.974952	0.986523	-6.31428
ENSG00000096080	MRPS18A	0.232271	0.0412879	1.54645	0.123125	0.280176	-4.99338
ENSG00000096093	EFHC1	-0.50529	2.34917	-2.4652	0.0142936	0.0697256	-3.50328
ENSG00000096384	HSP90AB1	-0.180111	4.1562	-1.19365	0.233625	0.417235	-5.77843
ENSG00000096696	DSP	-0.417327	-0.406434	-2.14421	0.0328771	0.119912	-3.90929
ENSG00000096717	SIRT1	0.504811	0.841153	3.72823	0.000233336	0.00483125	0.296788
ENSG00000096746	HNRNPH3	0.232942	2.95098	2.18601	0.0296432	0.111538	-4.13666
ENSG00000096872	IFT74	-0.244171	-0.233785	-1.45189	0.147653	0.314217	-5.10785
ENSG00000096968	JAK2	0.518895	2.56815	3.78109	0.000190875	0.00427445	0.382959
ENSG00000096996	IL12RB1	0.0712115	0.562857	0.567256	0.570995	0.733954	-6.07655
ENSG00000097033	SH3GLB1	0.314394	3.41353	2.41751	0.016266	0.074719	-3.63358
ENSG00000099139	PCSK5	-1.25345	3.27942	-2.38378	0.0178025	0.0796943	-3.71349
ENSG00000099194	SCD	-1.78574	0.478431	-7.2964	3.05526e-12	1.01482e-08	17.2788
ENSG00000099203	TMED1	0.126794	0.791602	0.981931	0.326982	0.51866	-5.813
ENSG00000099204	ABLIM1	-0.266614	0.31152	-1.41719	0.157539	0.327529	-5.25321
ENSG00000099246	RAB18	0.0541415	2.52157	0.494916	0.621048	0.768716	-6.32212
ENSG00000099250	NRP1	-0.632066	0.993089	-3.77872	0.000192612	0.00429072	0.435012
ENSG00000099282	TSPAN15	-0.689867	-0.586907	-3.39399	0.000788341	0.010869	-0.70751
ENSG00000099290	WASHC2A	0.229204	2.04658	1.68187	0.0937094	0.236352	-5.03604
ENSG00000099308	MAST3	0.13526	2.87316	1.00292	0.316766	0.508603	-5.96438
ENSG00000099326	MZF1	-0.228152	-0.183019	-1.97277	0.0495048	0.156646	-4.27352
ENSG00000099330	OCEL1	-0.376416	-0.186168	-2.1882	0.0294813	0.111151	-3.85917
ENSG00000099331	MYO9B	0.0486133	4.52168	0.457312	0.647801	0.787862	-6.3711
ENSG00000099337	KCNK6	-0.213882	1.42757	-1.3799	0.168719	0.341041	-5.44798
ENSG00000099338	CATSPERG	-0.294514	-0.123615	-1.64801	0.100471	0.247013	-4.83801
ENSG00000099341	PSMD8	-0.0420464	2.59258	-0.397915	0.690996	0.819538	-6.36881
ENSG00000099364	FBXL19	0.198088	0.0933172	1.44798	0.148742	0.315514	-5.13535
ENSG00000099377	HSD3B7	0.130356	0.922642	0.906591	0.365402	0.556898	-5.8958
ENSG00000099622	CIRBP	-0.0927021	3.14547	-0.827092	0.408889	0.596843	-6.13089
ENSG00000099624	ATP5F1D	0.0156459	1.56818	0.105072	0.916394	0.952196	-6.37037
ENSG00000099725	PRKY	0.0242369	-0.630566	0.124564	0.900958	0.945727	-6.01758
ENSG00000099783	HNRNPM	0.11613	3.96456	1.43176	0.153328	0.321397	-5.47333
ENSG00000099785	MARCHF2	-0.0259155	2.34988	-0.222959	0.82373	0.899357	-6.40944
ENSG00000099795	NDUFB7	-0.128726	1.48257	-0.672476	0.501835	0.676492	-6.15019
ENSG00000099797	TECR	-0.23058	2.16138	-1.57606	0.11614	0.270898	-5.22354
ENSG00000099800	TIMM13	-0.00819254	-0.144868	-0.044682	0.964393	0.980124	-6.10777
ENSG00000099804	CDC34	0.0277487	1.71598	0.228335	0.819552	0.896906	-6.36712
ENSG00000099810	MTAP	-0.426434	0.519696	-2.93411	0.003622	0.0284362	-2.16207
ENSG00000099812	MISP	-0.10415	-0.366099	-0.467349	0.640614	0.782893	-5.97237
ENSG00000099817	POLR2E	-0.0498845	2.18774	-0.374717	0.708155	0.831672	-6.35813
ENSG00000099821	POLRMT	-0.222238	-0.0830193	-1.43905	0.151253	0.318792	-5.15066
ENSG00000099860	GADD45B	0.110512	5.32248	0.846935	0.397755	0.585802	-6.11416
ENSG00000099875	MKNK2	-0.00830656	3.78475	-0.0565666	0.954931	0.974098	-6.47069
ENSG00000099899	TRMT2A	-0.257581	1.1937	-1.82508	0.0690547	0.193468	-4.73198
ENSG00000099901	RANBP1	-0.188876	1.24909	-1.29956	0.19482	0.372173	-5.52841
ENSG00000099904	ZDHHC8	-0.489371	-0.0285875	-3.1156	0.00202631	0.0193473	-1.58781
ENSG00000099910	KLHL22	-0.157433	0.793669	-1.35413	0.176786	0.350337	-5.4053
ENSG00000099917	MED15	0.0630637	3.40558	0.794769	0.427421	0.61388	-6.15984
ENSG00000099940	SNAP29	-0.0170341	1.02885	-0.173494	0.862389	0.923552	-6.29357
ENSG00000099942	CRKL	0.251897	1.29249	2.36901	0.0185143	0.0815095	-3.63538
ENSG00000099949	LZTR1	-0.0468281	1.02145	-0.378313	0.705485	0.830232	-6.24381
ENSG00000099956	SMARCB1	-0.0391565	1.94727	-0.44791	0.654564	0.792757	-6.31217
ENSG00000099968	BCL2L13	-0.0346895	1.49094	-0.288818	0.772935	0.868088	-6.32276
ENSG00000099977	DDT	0.159623	1.26784	1.09463	0.274618	0.46211	-5.75759
ENSG00000099985	OSM	0.2145	5.11116	0.998648	0.318827	0.510663	-5.98047
ENSG00000099991	CABIN1	-0.20067	1.41021	-1.53041	0.127045	0.285859	-5.23066
ENSG00000099992	TBC1D10A	-0.268715	0.480257	-2.06563	0.0397836	0.135418	-4.20854
ENSG00000099995	SF3A1	0.0849669	3.30686	0.81453	0.416034	0.60289	-6.14258
ENSG00000099998	GGT5	0.486192	0.332426	2.55349	0.0111952	0.0590914	-3.06229
ENSG00000100014	SPECC1L	0.356244	1.13468	2.38407	0.0177887	0.0796686	-3.57059
ENSG00000100023	PPIL2	-0.445409	0.705813	-2.85578	0.00461447	0.0335239	-2.38858
ENSG00000100024	UPB1	0.327251	1.32889	1.41684	0.157642	0.327598	-5.3672
ENSG00000100028	SNRPD3	-0.13401	0.97388	-0.920152	0.358285	0.549522	-5.90246
ENSG00000100029	PES1	-0.295652	1.03865	-2.4039	0.0168713	0.0764998	-3.54818
ENSG00000100030	MAPK1	0.0881163	3.04889	0.809961	0.418651	0.605575	-6.13917
ENSG00000100031	GGT1	0.1608	1.6964	0.878008	0.380692	0.570748	-6.0103
ENSG00000100034	PPM1F	0.207241	1.94973	1.47855	0.140385	0.30473	-5.34047
ENSG00000100055	CYTH4	0.246956	5.14767	1.75601	0.0801796	0.213668	-4.9665
ENSG00000100060	MFNG	-0.216304	0.890199	-1.34689	0.179105	0.352934	-5.43423
ENSG00000100075	SLC25A1	-0.30408	0.544515	-2.25523	0.0248914	0.0987628	-3.82178
ENSG00000100077	GRK3	-0.0847946	0.502058	-0.636396	0.525038	0.697309	-6.032
ENSG00000100083	GGA1	-0.0476072	3.29926	-0.455038	0.649434	0.78899	-6.36639
ENSG00000100084	HIRA	0.0955271	0.0483307	0.665538	0.506254	0.680536	-5.91067
ENSG00000100092	SH3BP1	0.146893	2.10714	1.25513	0.210477	0.392088	-5.64793
ENSG00000100097	LGALS1	-0.142572	5.43907	-0.937013	0.349559	0.54207	-6.03297
ENSG00000100099	HPS4	-0.126164	0.431977	-1.12979	0.259532	0.446547	-5.61162
ENSG00000100100	PIK3IP1	0.27225	2.07808	2.17171	0.0307167	0.114363	-4.12685
ENSG00000100106	TRIOBP	0.235072	1.96816	2.71258	0.0070896	0.0439761	-2.85736
ENSG00000100109	TFIP11	0.0170158	1.94469	0.164967	0.869089	0.926927	-6.39344
ENSG00000100121	GGTLC2	0.253518	0.846745	1.11962	0.263837	0.450826	-5.66569
ENSG00000100124	ANKRD54	-0.103513	0.0719685	-0.643763	0.520256	0.692924	-5.96553
ENSG00000100129	EIF3L	-0.076946	2.23975	-0.588546	0.55664	0.722326	-6.25985
ENSG00000100138	SNU13	-0.0466277	1.31666	-0.322196	0.747544	0.854071	-6.29652
ENSG00000100139	MICALL1	-0.043469	1.06433	-0.378902	0.705048	0.830079	-6.25161
ENSG00000100142	POLR2F	-0.260589	1.64426	-1.93016	0.0545975	0.166001	-4.58842
ENSG00000100150	DEPDC5	-0.0231242	1.29028	-0.17631	0.860178	0.922123	-6.32403
ENSG00000100151	PICK1	-0.465996	-0.0285292	-2.87331	0.00437295	0.032221	-2.25909
ENSG00000100162	CENPM	-0.581556	-0.319151	-2.48425	0.0135674	0.0674873	-3.19208
ENSG00000100201	DDX17	0.148231	4.7361	2.06701	0.0396523	0.135252	-4.39487
ENSG00000100207	TCF20	0.0241469	0.654408	0.210885	0.83313	0.904326	-6.23444
ENSG00000100211	CBY1	-0.705654	-0.13181	-3.85671	0.000142646	0.00356398	0.785907
ENSG00000100216	TOMM22	-0.370162	0.258331	-3.0286	0.00268608	0.0233738	-1.86379
ENSG00000100219	XBP1	0.0381445	3.72083	0.298811	0.765306	0.86425	-6.42889
ENSG00000100220	RTCB	0.000176059	1.3222	0.00106136	0.999154	0.99935	-6.33201
ENSG00000100221	JOSD1	-0.00946899	3.22002	-0.0707196	0.943671	0.968368	-6.46379
ENSG00000100225	FBXO7	-0.0960249	1.61934	-0.780459	0.43578	0.620542	-6.08315
ENSG00000100226	GTPBP1	0.221899	5.30911	1.60463	0.109703	0.26129	-5.21087
ENSG00000100227	POLDIP3	0.049598	1.48496	0.455016	0.64945	0.78899	-6.26465
ENSG00000100239	PPP6R2	0.0652051	1.5769	0.737666	0.461335	0.640685	-6.10924
ENSG00000100241	SBF1	-0.183495	1.76158	-1.82016	0.0698016	0.194559	-4.79318
ENSG00000100242	SUN2	0.244693	5.24289	2.3279	0.0206297	0.0875279	-3.83819
ENSG00000100243	CYB5R3	-0.178415	2.46815	-1.68735	0.0926493	0.234982	-5.05582
ENSG00000100258	LMF2	0.221231	1.56843	1.89679	0.0588842	0.174341	-4.62387
ENSG00000100263	RHBDD3	-0.12868	-0.222339	-0.881996	0.378535	0.568728	-5.73352
ENSG00000100266	PACSIN2	-0.0516472	4.0122	-0.56362	0.573464	0.735241	-6.31933
ENSG00000100280	AP1B1	0.0326902	2.01532	0.318943	0.750008	0.855513	-6.35852
ENSG00000100281	HMGXB4	-0.0477666	0.443592	-0.434059	0.66458	0.800267	-6.13433
ENSG00000100284	TOM1	0.110794	5.46613	1.04356	0.297591	0.488248	-5.92997
ENSG00000100288	CHKB	0.300872	2.13912	2.5784	0.0104371	0.05667	-3.20196
ENSG00000100292	HMOX1	-0.278077	4.25289	-1.60309	0.110041	0.261527	-5.22036
ENSG00000100296	THOC5	0.214506	1.7816	1.90325	0.0580328	0.172643	-4.63027
ENSG00000100297	MCM5	0.0503398	0.886083	0.345577	0.72992	0.843844	-6.23123
ENSG00000100299	ARSA	0.0346071	1.39745	0.329323	0.742158	0.8506	-6.30418
ENSG00000100300	TSPO	0.071759	4.36062	0.467449	0.640542	0.782893	-6.36703
ENSG00000100304	TTLL12	0.1025	-0.083129	0.846413	0.398045	0.586142	-5.77445
ENSG00000100307	CBX7	-0.300894	-0.292182	-2.03407	0.0428874	0.142389	-4.14112
ENSG00000100316	RPL3	-0.24285	4.64443	-1.91886	0.0560187	0.168535	-4.67939
ENSG00000100319	ZMAT5	-0.0314135	-0.0812998	-0.262385	0.793217	0.881662	-6.09491
ENSG00000100325	ASCC2	-0.128142	2.27589	-1.01756	0.309766	0.501701	-5.92942
ENSG00000100330	MTMR3	0.243392	3.23077	2.13918	0.0332858	0.121172	-4.24144
ENSG00000100335	MIEF1	-0.432387	-0.0536106	-3.12842	0.00194285	0.0188614	-1.54813
ENSG00000100336	APOL4	0.259168	0.620662	1.23212	0.218939	0.401631	-5.49249
ENSG00000100342	APOL1	0.560659	2.74135	2.68824	0.00761326	0.0459785	-2.94542
ENSG00000100345	MYH9	0.134407	5.76102	1.702	0.0898648	0.230552	-5.04652
ENSG00000100348	TXN2	-0.0320089	1.17545	-0.278199	0.781065	0.873432	-6.30194
ENSG00000100353	EIF3D	-0.0527487	2.58391	-0.573607	0.566694	0.730366	-6.28534
ENSG00000100354	TNRC6B	-0.0706325	1.97723	-0.613826	0.539829	0.710122	-6.22875
ENSG00000100359	SGSM3	0.0873521	1.21676	0.603599	0.546599	0.715046	-6.15422
ENSG00000100360	IFT27	-0.400043	-0.54201	-2.20921	0.0279695	0.107133	-3.75458
ENSG00000100364	KIAA0930	-0.00503638	2.5656	-0.0413524	0.967044	0.981907	-6.43848
ENSG00000100365	NCF4	0.386376	4.1351	3.21303	0.00146686	0.0158331	-1.50783
ENSG00000100368	CSF2RB	0.704898	5.28236	5.07307	7.1378e-07	8.4656e-05	5.58137
ENSG00000100376	FAM118A	-0.0184581	1.26063	-0.119784	0.90474	0.947777	-6.34071
ENSG00000100379	KCTD17	-0.193293	0.0529487	-1.1203	0.263548	0.450489	-5.55447
ENSG00000100380	ST13	-0.224932	2.85787	-2.03585	0.0427066	0.141932	-4.44499
ENSG00000100385	IL2RB	0.507432	0.490569	2.20971	0.0279346	0.107104	-3.85976
ENSG00000100387	RBX1	0.0541207	0.758707	0.385318	0.700295	0.825791	-6.19537
ENSG00000100393	EP300	0.330175	3.46255	3.28105	0.0011652	0.0138634	-1.29445
ENSG00000100401	RANGAP1	-0.140829	0.915384	-1.15269	0.250021	0.436151	-5.66339
ENSG00000100410	PHF5A	-0.137436	0.724989	-1.01962	0.30879	0.500614	-5.77015
ENSG00000100412	ACO2	-0.391807	1.45317	-3.28976	0.00113103	0.0136611	-1.20304
ENSG00000100413	POLR3H	-0.384376	-0.252199	-2.4772	0.0138321	0.06817	-3.21676
ENSG00000100416	TRMU	-0.478181	0.491138	-3.75872	0.000207866	0.00447544	0.404803
ENSG00000100418	DESI1	-0.180074	0.900572	-1.30338	0.193516	0.370473	-5.48254
ENSG00000100422	CERK	-0.0773949	1.54169	-0.592027	0.55431	0.719992	-6.20964
ENSG00000100425	BRD1	-0.0895999	1.07841	-0.802804	0.422769	0.609332	-6.01416
ENSG00000100429	HDAC10	0.108261	0.948741	0.892364	0.372964	0.563713	-5.90843
ENSG00000100439	ABHD4	-0.197312	0.873995	-1.20405	0.229587	0.41272	-5.60976
ENSG00000100441	KHNYN	0.0500414	1.71871	0.527171	0.598492	0.754772	-6.25262
ENSG00000100445	SDR39U1	-0.111732	-0.231486	-0.588584	0.556615	0.722326	-5.93895
ENSG00000100453	GZMB	1.4419	1.99255	4.47759	1.10009e-05	0.000601628	3.07615
ENSG00000100461	RBM23	-0.0279513	3.84461	-0.25811	0.796512	0.882989	-6.4415
ENSG00000100462	PRMT5	-0.00154246	1.45659	-0.0111141	0.99114	0.995489	-6.36305
ENSG00000100478	AP4S1	-0.202205	0.575731	-1.57415	0.116582	0.271564	-5.0608
ENSG00000100485	SOS2	0.229188	1.96186	1.99391	0.0471314	0.151671	-4.47491
ENSG00000100490	CDKL1	-1.25182	0.776904	-4.48641	1.05847e-05	0.000586586	3.11174
ENSG00000100503	NIN	0.26109	3.22651	2.37638	0.0181559	0.080872	-3.72528
ENSG00000100504	PYGL	0.156752	3.67459	1.01687	0.310093	0.501804	-5.9654
ENSG00000100519	PSMC6	-0.00306851	2.13774	-0.0318752	0.974594	0.986317	-6.42105
ENSG00000100523	DDHD1	-0.20012	0.342194	-1.3561	0.17616	0.349622	-5.32493
ENSG00000100528	CNIH1	0.0213079	1.1186	0.135734	0.892129	0.940572	-6.31682
ENSG00000100554	ATP6V1D	-0.0281972	2.88785	-0.30447	0.760996	0.861985	-6.41374
ENSG00000100564	PIGH	-0.139767	1.15194	-1.25447	0.210717	0.392138	-5.57422
ENSG00000100567	PSMA3	0.237793	3.1447	2.23663	0.0260979	0.101992	-4.03239
ENSG00000100568	VTI1B	-0.226785	1.06593	-1.79766	0.0733081	0.200986	-4.76834
ENSG00000100578	KIAA0586	-0.173894	0.292267	-1.18629	0.236512	0.42039	-5.52487
ENSG00000100591	AHSA1	-0.125473	2.63808	-0.888126	0.375235	0.565669	-6.0654
ENSG00000100592	DAAM1	-0.52099	0.0635841	-3.15385	0.00178659	0.0179096	-1.48448
ENSG00000100596	SPTLC2	0.45144	2.46401	2.72936	0.00674768	0.0427905	-2.82998
ENSG00000100599	AL159141.1	0.155638	3.19894	1.37557	0.170053	0.342961	-5.53937
ENSG00000100600	LGMN	-0.0302088	3.35465	-0.15884	0.87391	0.929633	-6.45289
ENSG00000100603	SNW1	0.130557	1.86953	1.27569	0.203123	0.383495	-5.60649
ENSG00000100605	ITPK1	0.0174414	2.84328	0.160007	0.872991	0.929353	-6.44124
ENSG00000100612	DHRS7	0.168873	2.66094	1.4638	0.144369	0.309826	-5.40033
ENSG00000100614	PPM1A	0.302175	2.13031	2.8992	0.00403741	0.0305288	-2.36748
ENSG00000100632	ERH	-0.00155476	2.10462	-0.0103847	0.991722	0.995655	-6.41635
ENSG00000100644	HIF1A	0.204176	5.9809	1.70585	0.0891456	0.229185	-5.03711
ENSG00000100647	SUSD6	0.26788	4.23069	2.31346	0.0214219	0.089317	-3.87687
ENSG00000100650	SRSF5	0.0282398	4.19926	0.297378	0.766399	0.86479	-6.43106
ENSG00000100664	EIF5	-0.0835124	4.14778	-1.01745	0.309818	0.501702	-5.96831
ENSG00000100697	DICER1	0.308253	2.72722	2.91761	0.00381323	0.029418	-2.34289
ENSG00000100711	ZFYVE21	-0.49994	0.0562151	-3.27432	0.00119224	0.0140424	-1.12716
ENSG00000100714	MTHFD1	-0.354766	0.455948	-2.22449	0.0269127	0.104098	-3.8719
ENSG00000100722	ZC3H14	-0.0472619	0.985274	-0.339773	0.734282	0.846303	-6.25422
ENSG00000100726	TELO2	-0.0862652	0.152877	-0.611469	0.541385	0.71125	-6.00125
ENSG00000100731	PCNX1	0.0469398	4.19103	0.443266	0.657916	0.795641	-6.37872
ENSG00000100744	GSKIP	0.285694	0.185031	1.94849	0.0523557	0.162267	-4.34113
ENSG00000100749	VRK1	-0.0176741	0.63816	-0.118529	0.905734	0.948212	-6.2443
ENSG00000100764	PSMC1	-0.0295889	2.69691	-0.289791	0.772191	0.867943	-6.40874
ENSG00000100767	PAPLN	-0.20874	-0.0590625	-1.46678	0.143558	0.309199	-5.11296
ENSG00000100796	PPP4R3A	0.205326	2.29648	2.11196	0.0355752	0.127069	-4.2621
ENSG00000100802	C14orf93	0.409367	-0.0285041	2.27207	0.0238408	0.0959088	-3.65766
ENSG00000100804	PSMB5	0.0188432	0.771543	0.117024	0.906925	0.948529	-6.26914
ENSG00000100811	YY1	-0.00911276	1.80582	-0.0877521	0.930136	0.959776	-6.39391
ENSG00000100813	ACIN1	0.171153	3.52219	2.10677	0.0360271	0.127961	-4.31243
ENSG00000100815	TRIP11	0.210046	0.438259	1.64655	0.100773	0.247569	-4.8995
ENSG00000100823	APEX1	-0.117272	0.755045	-0.76914	0.442459	0.626001	-5.99279
ENSG00000100836	PABPN1	-0.0281345	2.40124	-0.32016	0.749085	0.854857	-6.38712
ENSG00000100852	ARHGAP5	-0.36343	0.217256	-2.37585	0.0181816	0.0809498	-3.50916
ENSG00000100865	CINP	-0.0919868	0.734432	-0.823051	0.411179	0.598676	-5.94729
ENSG00000100883	SRP54	0.211691	2.232	2.01288	0.0450842	0.147005	-4.4571
ENSG00000100888	CHD8	0.0304847	2.114	0.39922	0.690035	0.819386	-6.34196
ENSG00000100889	PCK2	-0.100999	0.964455	-0.699181	0.485019	0.661109	-6.07461
ENSG00000100890	PRORP	-0.147894	0.281443	-1.14603	0.25276	0.438986	-5.56676
ENSG00000100897	DCAF11	0.273606	2.15513	3.0079	0.00286972	0.0244373	-2.06704
ENSG00000100902	PSMA6	0.0894291	3.80467	0.867398	0.386467	0.576072	-6.10524
ENSG00000100906	NFKBIA	0.264274	8.02306	1.87429	0.0619316	0.180211	-4.70662
ENSG00000100908	EMC9	0.00975213	-0.332333	0.05778	0.953965	0.973749	-6.06469
ENSG00000100911	PSME2	0.275925	3.71019	1.85622	0.0644722	0.185087	-4.79256
ENSG00000100918	REC8	0.49603	2.95214	3.71294	0.000247181	0.00499911	0.133153
ENSG00000100926	TM9SF1	0.0596886	1.42909	0.525109	0.599923	0.755777	-6.22228
ENSG00000100934	SEC23A	-0.258982	1.65705	-2.32683	0.0206877	0.0875732	-3.77684
ENSG00000100938	GMPR2	0.242561	3.2537	2.51174	0.0125767	0.0639822	-3.40872
ENSG00000100941	PNN	-0.0875722	1.6451	-0.7358	0.462468	0.641293	-6.12598
ENSG00000100949	RABGGTA	-0.152951	1.14948	-1.2829	0.200588	0.380021	-5.5419
ENSG00000100979	PLTP	-0.265422	0.914526	-1.33388	0.183326	0.358923	-5.44454
ENSG00000100982	PCIF1	0.196887	1.1198	1.93722	0.0537242	0.164652	-4.50481
ENSG00000100983	GSS	-0.250331	0.896308	-2.05196	0.041103	0.138237	-4.27491
ENSG00000100985	MMP9	0.838865	3.21855	3.20481	0.00150787	0.0161517	-1.51564
ENSG00000100991	TRPC4AP	0.197011	2.24053	2.0137	0.0449978	0.146773	-4.45474
ENSG00000100994	PYGB	-0.288204	0.435839	-2.13787	0.0333932	0.121428	-4.04554
ENSG00000100997	ABHD12	-0.397194	1.86172	-2.9249	0.00372757	0.0289159	-2.29656
ENSG00000101000	PROCR	-0.650101	0.0966707	-3.1951	0.00155764	0.0164281	-1.37329
ENSG00000101017	CD40	0.113482	1.40181	0.740018	0.459909	0.639455	-6.08379
ENSG00000101019	UQCC1	-0.319838	0.269068	-1.99982	0.0464854	0.150238	-4.29817
ENSG00000101040	ZMYND8	-0.161176	0.515082	-1.15785	0.247913	0.434417	-5.59273
ENSG00000101052	IFT52	-0.292495	-0.270853	-1.63388	0.103407	0.252089	-4.83784
ENSG00000101084	RAB5IF	0.344738	3.83823	3.28271	0.00115864	0.0138554	-1.29305
ENSG00000101104	PABPC1L	0.20308	1.29444	1.70924	0.0885145	0.22846	-4.9247
ENSG00000101109	STK4	0.351518	3.45455	3.17056	0.00169034	0.017297	-1.63102
ENSG00000101126	ADNP	0.262084	0.843006	2.10332	0.0363302	0.128513	-4.14237
ENSG00000101138	CSTF1	0.0650886	0.610442	0.483348	0.629226	0.775329	-6.1359
ENSG00000101146	RAE1	0.32325	0.103968	2.59521	0.00995166	0.0547591	-2.95429
ENSG00000101150	TPD52L2	0.175458	3.70488	1.82258	0.0694327	0.194116	-4.85415
ENSG00000101152	DNAJC5	0.221682	2.62722	2.10811	0.0359101	0.127801	-4.28738
ENSG00000101158	NELFCD	-0.0400318	1.51669	-0.436933	0.662497	0.798691	-6.27841
ENSG00000101160	CTSZ	-0.155414	5.06686	-1.11361	0.266403	0.453637	-5.86168
ENSG00000101161	PRPF6	-0.0671936	0.984229	-0.674333	0.500656	0.675409	-6.0883
ENSG00000101166	PRELID3B	-0.221886	1.28972	-1.88567	0.0603748	0.177339	-4.63563
ENSG00000101181	MTG2	-0.0288427	1.14797	-0.26221	0.793352	0.881662	-6.30351
ENSG00000101182	PSMA7	-0.148102	3.67265	-1.39797	0.163228	0.334413	-5.51898
ENSG00000101187	SLCO4A1	0.464427	2.65015	2.27116	0.0238964	0.0959756	-3.94114
ENSG00000101191	DIDO1	0.102241	0.895817	1.17921	0.239315	0.423708	-5.6139
ENSG00000101193	GID8	-0.0434173	0.0990895	-0.312716	0.75473	0.857718	-6.1145
ENSG00000101199	ARFGAP1	-0.0673161	1.91862	-0.691686	0.489708	0.664824	-6.17404
ENSG00000101224	CDC25B	-0.0390906	-0.0965087	-0.234394	0.81485	0.893748	-6.08532
ENSG00000101236	RNF24	0.525866	2.86015	3.66675	0.000293898	0.00556692	-0.0233894
ENSG00000101246	ARFRP1	0.229971	1.20408	1.9162	0.0563573	0.169244	-4.55352
ENSG00000101255	TRIB3	0.577095	0.578903	3.21861	0.00143963	0.0156941	-1.31084
ENSG00000101265	RASSF2	0.604757	3.64172	4.08826	5.68369e-05	0.00192221	1.48026
ENSG00000101266	CSNK2A1	-0.353622	1.73017	-3.31306	0.00104417	0.0128576	-1.14673
ENSG00000101290	CDS2	0.184765	2.1771	1.53449	0.126039	0.28444	-5.27008
ENSG00000101294	HM13	0.180076	4.12201	1.79104	0.0743676	0.202734	-4.9118
ENSG00000101307	SIRPB1	0.243906	3.92908	1.61945	0.106476	0.256774	-5.1945
ENSG00000101310	SEC23B	0.0865356	1.94826	0.856758	0.392311	0.582051	-6.04712
ENSG00000101336	HCK	0.2785	5.38993	2.55562	0.0111283	0.058873	-3.30377
ENSG00000101337	TM9SF4	-0.0170224	2.06282	-0.150063	0.880823	0.934054	-6.40835
ENSG00000101342	TLDC2	0.67918	-0.0803606	2.67479	0.00791754	0.0472419	-2.6929
ENSG00000101343	CRNKL1	0.271698	0.241501	2.09165	0.0373705	0.13087	-4.07135
ENSG00000101347	SAMHD1	0.109551	4.40086	0.732262	0.464621	0.643281	-6.21161
ENSG00000101350	KIF3B	0.00922384	0.321951	0.0805196	0.935882	0.963382	-6.19903
ENSG00000101361	NOP56	-0.0820944	1.74238	-0.632649	0.527479	0.699446	-6.20098
ENSG00000101363	MANBAL	-0.16179	0.166526	-1.3223	0.187148	0.363513	-5.33855
ENSG00000101365	IDH3B	0.0147528	1.04209	0.132267	0.894868	0.942249	-6.29993
ENSG00000101367	MAPRE1	0.143842	2.94747	1.42715	0.154651	0.323018	-5.46298
ENSG00000101384	JAG1	0.180742	0.725545	1.41063	0.159465	0.329369	-5.30346
ENSG00000101413	RPRD1B	-0.166123	1.25817	-1.44748	0.148882	0.315574	-5.33593
ENSG00000101421	CHMP4B	0.142795	3.9773	1.45202	0.147616	0.314217	-5.44488
ENSG00000101425	BPI	0.21231	-0.190544	1.06623	0.287238	0.475702	-5.55072
ENSG00000101439	CST3	-0.0427296	4.96522	-0.256367	0.797855	0.883176	-6.43783
ENSG00000101443	WFDC2	0.401607	3.09772	1.12399	0.261981	0.448981	-5.83924
ENSG00000101444	AHCY	-0.367724	0.472687	-2.90482	0.00396765	0.0302069	-2.23189
ENSG00000101445	PPP1R16B	0.244811	-0.446478	1.10494	0.270135	0.457538	-5.44347
ENSG00000101457	DNTTIP1	0.247103	2.27194	2.01369	0.0449982	0.146773	-4.45597
ENSG00000101460	MAP1LC3A	-0.0789241	1.77906	-0.464008	0.643003	0.78453	-6.29614
ENSG00000101473	ACOT8	0.276492	-0.075052	1.98652	0.0479497	0.153419	-4.22727
ENSG00000101474	APMAP	0.0683638	2.28506	0.499314	0.61795	0.7673	-6.3059
ENSG00000101493	ZNF516	0.268661	2.01654	2.12113	0.0347898	0.125035	-4.22673
ENSG00000101544	ADNP2	0.468892	1.31585	2.70644	0.00721858	0.0446075	-2.81741
ENSG00000101557	USP14	-0.214059	0.472156	-1.7778	0.0765227	0.207075	-4.72025
ENSG00000101558	VAPA	-0.0244541	4.05149	-0.253329	0.8002	0.884777	-6.44347
ENSG00000101577	LPIN2	0.204157	2.29508	1.57693	0.11594	0.270704	-5.21435
ENSG00000101596	SMCHD1	0.42121	5.03044	2.78133	0.00578107	0.0388456	-2.73327
ENSG00000101608	MYL12A	0.391749	5.74162	4.11946	5.00469e-05	0.00176042	1.60225
ENSG00000101654	RNMT	-0.0867204	0.739907	-0.631536	0.528205	0.700001	-6.08264
ENSG00000101665	SMAD7	0.0548918	1.01506	0.410274	0.681919	0.813181	-6.23295
ENSG00000101745	ANKRD12	0.215554	3.73427	2.07445	0.0389512	0.133928	-4.37974
ENSG00000101751	POLI	-0.0916572	0.339841	-0.606509	0.544668	0.713469	-6.02026
ENSG00000101773	RBBP8	-0.129859	0.693817	-0.887212	0.375726	0.565848	-5.88226
ENSG00000101782	RIOK3	0.0219891	2.60966	0.217541	0.827945	0.901274	-6.42412
ENSG00000101843	PSMD10	-0.237271	0.822248	-1.72978	0.0847714	0.222116	-4.85145
ENSG00000101849	TBL1X	0.0931944	2.0061	0.800064	0.424352	0.610809	-6.1
ENSG00000101856	PGRMC1	0.0468757	0.0109245	0.287648	0.773829	0.868595	-6.08939
ENSG00000101882	NKAP	0.0653937	0.397659	0.544513	0.586522	0.745263	-6.06301
ENSG00000101901	ALG13	0.207298	1.71671	1.23243	0.218821	0.401631	-5.64172
ENSG00000101911	PRPS2	-0.137452	0.2755	-0.885761	0.376506	0.566544	-5.81341
ENSG00000101916	TLR8	0.682575	2.3188	3.84191	0.000151068	0.00370772	0.615169
ENSG00000101940	WDR13	0.0124068	2.0932	0.103316	0.917786	0.952453	-6.41418
ENSG00000101966	XIAP	0.387174	2.21288	2.63903	0.00878001	0.0505441	-3.05538
ENSG00000101972	STAG2	0.105242	3.32028	1.02108	0.308097	0.49982	-5.95754
ENSG00000101974	ATP11C	0.436546	0.383064	2.95403	0.00340285	0.0273005	-2.0479
ENSG00000101986	ABCD1	0.209188	1.15995	1.66315	0.097401	0.241759	-4.97382
ENSG00000102007	PLP2	0.329939	3.7107	2.40855	0.0166621	0.0761828	-3.65751
ENSG00000102030	NAA10	0.188956	1.80494	1.62461	0.10537	0.255106	-5.10995
ENSG00000102032	RENBP	0.224896	2.98251	1.60335	0.109984	0.261454	-5.20516
ENSG00000102034	ELF4	0.534485	2.42321	4.7861	2.75659e-06	0.000218776	4.32884
ENSG00000102054	RBBP7	-0.0643198	0.996279	-0.52783	0.598035	0.754461	-6.17685
ENSG00000102081	FMR1	0.187114	3.04237	1.56866	0.117858	0.273341	-5.25961
ENSG00000102096	PIM2	0.347033	3.24892	2.20618	0.0281834	0.107784	-4.10035
ENSG00000102100	SLC35A2	0.13671	0.909806	0.921821	0.357416	0.548807	-5.88378
ENSG00000102103	PQBP1	0.0232058	1.39622	0.193679	0.846568	0.913773	-6.3419
ENSG00000102119	EMD	-0.088808	2.42952	-0.641728	0.521575	0.693929	-6.24089
ENSG00000102125	TAZ	0.05152	0.904122	0.422037	0.673322	0.806643	-6.20708
ENSG00000102144	PGK1	0.00168053	4.50218	0.0174722	0.986072	0.992384	-6.47351
ENSG00000102158	MAGT1	-0.114224	1.52341	-1.14119	0.254768	0.44125	-5.74391
ENSG00000102172	SMS	-0.25273	1.62453	-2.09043	0.0374807	0.131081	-4.27616
ENSG00000102181	CD99L2	-0.119831	0.39178	-1.03258	0.30269	0.493966	-5.7103
ENSG00000102189	EEA1	-0.229354	0.177785	-1.90367	0.0579786	0.172534	-4.4508
ENSG00000102218	RP2	0.297544	2.08462	2.61422	0.00942722	0.0526385	-3.11016
ENSG00000102225	CDK16	-0.0337941	1.95349	-0.287863	0.773665	0.868516	-6.36914
ENSG00000102226	USP11	0.00832272	1.08619	0.0652165	0.948048	0.970325	-6.31616
ENSG00000102265	TIMP1	0.0980406	6.84526	0.565668	0.572072	0.734327	-6.28015
ENSG00000102316	MAGED2	0.0104393	1.05834	0.0705329	0.94382	0.968414	-6.31251
ENSG00000102317	RBM3	-0.0249408	2.61952	-0.185754	0.852772	0.917072	-6.4296
ENSG00000102390	PBDC1	-0.355879	0.0551146	-2.12751	0.0342515	0.123597	-4.01462
ENSG00000102393	GLA	0.194721	3.15659	1.31371	0.19002	0.36692	-5.62078
ENSG00000102401	ARMCX3	0.0578181	1.63398	0.51299	0.608362	0.761822	-6.25365
ENSG00000102445	RUBCNL	-0.252671	2.79039	-1.22498	0.221611	0.403765	-5.72424
ENSG00000102524	TNFSF13B	0.866975	4.06875	4.58469	6.86006e-06	0.000444279	3.45296
ENSG00000102531	FNDC3A	0.349438	2.49324	3.30418	0.00107654	0.0131482	-1.19882
ENSG00000102543	CDADC1	0.19639	0.744712	1.19234	0.234139	0.417561	-5.5673
ENSG00000102547	CAB39L	-0.0638105	-0.238486	-0.340049	0.734075	0.846262	-6.02299
ENSG00000102554	KLF5	0.0789016	1.48166	0.35456	0.723186	0.840898	-6.30766
ENSG00000102572	STK24	0.158307	2.98525	1.65524	0.0989961	0.244301	-5.12095
ENSG00000102575	ACP5	-0.56348	2.63747	-2.68516	0.00768191	0.0462196	-2.96854
ENSG00000102580	DNAJC3	0.0885321	2.22913	0.762369	0.446482	0.629227	-6.14345
ENSG00000102595	UGGT2	-0.436222	0.147744	-2.55159	0.0112549	0.0593427	-3.10346
ENSG00000102606	ARHGEF7	0.0680791	1.537	0.67104	0.502749	0.677118	-6.1499
ENSG00000102699	PARP4	0.196471	2.46863	1.59781	0.111213	0.26322	-5.18901
ENSG00000102710	SUPT20H	0.0978892	1.83761	0.866278	0.387079	0.57641	-6.03112
ENSG00000102755	FLT1	-0.0823659	1.05707	-0.554162	0.57991	0.740324	-6.17767
ENSG00000102760	RGCC	-0.250822	3.111	-1.2169	0.224666	0.40677	-5.73927
ENSG00000102786	INTS6	0.267043	2.33853	2.4364	0.0154575	0.0725359	-3.55635
ENSG00000102794	ACOD1	1.21006	1.95595	3.52416	0.000496031	0.00807096	-0.426693
ENSG00000102796	DHRS12	0.0965995	0.90134	0.557498	0.577633	0.738596	-6.14162
ENSG00000102804	TSC22D1	-0.407059	1.3906	-2.57054	0.010671	0.0575591	-3.19438
ENSG00000102805	CLN5	-0.35094	1.86073	-2.31651	0.0212523	0.0888903	-3.81612
ENSG00000102854	MSLN	0.205801	-0.209838	0.826063	0.409472	0.597516	-5.76773
ENSG00000102858	MGRN1	-0.0498902	3.22739	-0.567578	0.570776	0.733954	-6.30889
ENSG00000102871	TRADD	0.0554841	0.94621	0.443995	0.657389	0.79535	-6.20392
ENSG00000102879	CORO1A	0.73616	5.22446	5.77528	2.03958e-08	7.72791e-06	8.9493
ENSG00000102882	MAPK3	0.253008	2.38613	2.38331	0.0178246	0.0797206	-3.68053
ENSG00000102886	GDPD3	-0.0167723	-0.441755	-0.0881624	0.929811	0.959776	-6.04349
ENSG00000102893	PHKB	-0.0733223	1.71405	-0.738045	0.461105	0.640486	-6.12816
ENSG00000102897	LYRM1	0.280286	2.47838	2.44699	0.0150202	0.0714714	-3.53677
ENSG00000102898	NUTF2	-0.129343	1.16148	-0.842028	0.400491	0.588336	-5.99559
ENSG00000102900	NUP93	-0.172206	1.06183	-1.31069	0.191037	0.368089	-5.4894
ENSG00000102901	CENPT	-0.224519	0.265382	-1.61542	0.107346	0.257687	-4.94921
ENSG00000102908	NFAT5	0.122829	2.25035	1.36988	0.171823	0.345335	-5.51243
ENSG00000102910	LONP2	-0.0466409	0.44052	-0.422174	0.673222	0.806643	-6.13676
ENSG00000102921	N4BP1	0.378137	4.38944	2.55735	0.0110745	0.0587662	-3.30713
ENSG00000102931	ARL2BP	-0.198554	0.234698	-1.03285	0.302568	0.493943	-5.68171
ENSG00000102974	CTCF	-0.113754	0.868707	-1.34841	0.178617	0.352437	-5.41799
ENSG00000102978	POLR2C	-0.328643	1.17078	-3.31796	0.00102672	0.0127454	-1.09492
ENSG00000103005	USB1	0.331437	3.44027	3.33712	0.000961004	0.0121648	-1.11925
ENSG00000103018	CYB5B	0.0908495	0.642074	0.685816	0.493396	0.668547	-6.01364
ENSG00000103035	PSMD7	0.119404	2.03431	1.1287	0.25999	0.447125	-5.7877
ENSG00000103042	SLC38A7	-0.0573041	0.556759	-0.394663	0.693392	0.821003	-6.17421
ENSG00000103043	VAC14	-0.172185	1.82737	-1.3698	0.171848	0.345335	-5.49104
ENSG00000103047	TANGO6	-0.354633	0.266091	-1.91397	0.0566432	0.169841	-4.44886
ENSG00000103051	COG4	0.0893241	0.480472	0.706431	0.480508	0.657235	-5.97876
ENSG00000103056	SMPD3	-0.30017	-0.329817	-1.61602	0.107216	0.257653	-4.85657
ENSG00000103064	SLC7A6	-0.0552691	0.604334	-0.360175	0.718988	0.838277	-6.18935
ENSG00000103066	PLA2G15	-0.810928	0.744562	-5.26918	2.73884e-07	4.18973e-05	6.52334
ENSG00000103091	WDR59	-0.263363	1.23221	-1.69888	0.0904524	0.231336	-4.95918
ENSG00000103111	MON1B	0.177188	2.04335	1.81032	0.0713182	0.197318	-4.82085
ENSG00000103121	CMC2	0.0938152	1.80221	0.606945	0.54438	0.713469	-6.21796
ENSG00000103126	AXIN1	0.0845025	0.61872	0.823295	0.411041	0.598597	-5.91794
ENSG00000103145	HCFC1R1	-0.0346789	0.224972	-0.208883	0.834691	0.905222	-6.1601
ENSG00000103152	MPG	-0.067032	0.13916	-0.444033	0.657361	0.79535	-6.07098
ENSG00000103160	HSDL1	0.132224	0.729622	0.869449	0.385346	0.575481	-5.892
ENSG00000103168	TAF1C	0.437474	1.70663	2.18606	0.029639	0.111538	-4.05472
ENSG00000103174	NAGPA	-0.313442	0.282241	-2.11506	0.0353085	0.126483	-4.0742
ENSG00000103187	COTL1	0.294328	5.32085	2.93931	0.00356359	0.0282106	-2.29953
ENSG00000103194	USP10	0.183002	3.31723	1.44099	0.150706	0.318084	-5.45172
ENSG00000103196	CRISPLD2	0.442003	2.19438	3.18976	0.00158568	0.0165993	-1.53429
ENSG00000103197	TSC2	-0.0573291	2.48481	-0.508182	0.611726	0.763615	-6.31777
ENSG00000103222	ABCC1	-0.0148886	1.71393	-0.139555	0.889112	0.939403	-6.37849
ENSG00000103226	NOMO3	-0.245668	1.26193	-1.32984	0.184655	0.360162	-5.4984
ENSG00000103245	CIAO3	0.0614862	-0.0667136	0.388625	0.697849	0.824025	-6.04863
ENSG00000103248	MTHFSD	-0.149722	0.209642	-0.973578	0.331107	0.522998	-5.73843
ENSG00000103249	CLCN7	0.220501	4.11889	1.30581	0.19269	0.369827	-5.64116
ENSG00000103254	ANTKMT	-0.119895	-0.504833	-0.663454	0.507586	0.681767	-5.82374
ENSG00000103257	SLC7A5	0.501898	3.31833	3.44743	0.000652888	0.00964711	-0.763396
ENSG00000103264	FBXO31	-0.556403	-0.383547	-2.95232	0.00342119	0.0274004	-2.0048
ENSG00000103266	STUB1	-0.100976	1.11453	-0.654598	0.513264	0.686211	-6.12114
ENSG00000103274	NUBP1	-0.23883	0.701303	-1.6573	0.0985792	0.2437	-4.95143
ENSG00000103275	UBE2I	0.061803	2.17454	0.602738	0.547171	0.715473	-6.24474
ENSG00000103313	MEFV	0.632933	4.02763	4.15218	4.37596e-05	0.00160137	1.72056
ENSG00000103326	CAPN15	0.050717	1.46593	0.425665	0.670679	0.805142	-6.27423
ENSG00000103335	PIEZO1	-0.0682064	1.63483	-0.520312	0.603258	0.758018	-6.25157
ENSG00000103342	GSPT1	-0.184869	1.78715	-1.53977	0.124745	0.282362	-5.24886
ENSG00000103351	CLUAP1	-0.494584	-0.257819	-2.54959	0.0113181	0.0595488	-3.04832
ENSG00000103353	UBFD1	-0.0974533	0.728129	-0.617682	0.537287	0.708523	-6.0878
ENSG00000103363	ELOB	-0.0574614	3.0785	-0.438499	0.661362	0.798033	-6.36854
ENSG00000103365	GGA2	-0.421878	2.01382	-3.24067	0.0013365	0.0150352	-1.38492
ENSG00000103381	CPPED1	0.408679	2.24016	2.934	0.00362324	0.0284362	-2.27209
ENSG00000103415	HMOX2	-0.494866	0.902305	-3.97268	9.04522e-05	0.00261886	1.13227
ENSG00000103423	DNAJA3	-0.34175	0.327048	-2.14839	0.0325401	0.119036	-4.02132
ENSG00000103429	BFAR	0.0103801	1.42048	0.106127	0.915558	0.951817	-6.35819
ENSG00000103479	RBL2	-0.0130302	1.85148	-0.144124	0.885507	0.937002	-6.39178
ENSG00000103490	PYCARD	0.376345	3.00087	2.76818	0.00601306	0.0397265	-2.75311
ENSG00000103495	MAZ	0.0479459	2.10966	0.345602	0.729901	0.843844	-6.36024
ENSG00000103496	STX4	0.10718	4.23388	0.949093	0.343392	0.536091	-6.03367
ENSG00000103502	CDIPT	0.3223	1.2834	2.68477	0.00769075	0.0462196	-2.86749
ENSG00000103507	BCKDK	0.0583413	2.0655	0.528181	0.597792	0.754332	-6.28034
ENSG00000103510	KAT8	-0.210774	1.92349	-2.10673	0.0360302	0.127961	-4.26355
ENSG00000103512	NOMO1	-0.0484292	0.70663	-0.318494	0.750348	0.855686	-6.21757
ENSG00000103534	TMC5	-0.488488	0.332172	-1.98688	0.0479104	0.153376	-4.33969
ENSG00000103544	VPS35L	-0.312053	1.58147	-2.66469	0.00815293	0.0480584	-2.9673
ENSG00000103549	RNF40	0.0349791	2.37529	0.353178	0.72422	0.841091	-6.37271
ENSG00000103569	AQP9	0.284429	7.18252	2.0891	0.0376018	0.131306	-4.31285
ENSG00000103591	AAGAB	0.11358	0.905982	0.94676	0.344577	0.537052	-5.85322
ENSG00000103642	LACTB	0.419092	2.70846	3.21087	0.00147752	0.0158958	-1.48785
ENSG00000103653	CSK	0.277763	3.71361	2.78533	0.00571215	0.0386198	-2.72263
ENSG00000103657	HERC1	0.107578	2.09166	1.03011	0.303846	0.49529	-5.89841
ENSG00000103671	TRIP4	-0.0159731	1.11719	-0.136171	0.891784	0.940505	-6.30921
ENSG00000103723	AP3B2	0.0637348	0.589221	0.333556	0.738964	0.849076	-6.18362
ENSG00000103769	RAB11A	0.113921	3.40758	0.997831	0.319223	0.511213	-5.9812
ENSG00000103811	CTSH	-0.0421196	4.20376	-0.319974	0.749226	0.854919	-6.42481
ENSG00000103855	CD276	-0.767116	0.937953	-4.55479	7.8336e-06	0.000476012	3.38703
ENSG00000103876	FAH	-0.353079	-0.110543	-1.93459	0.0540476	0.164924	-4.36672
ENSG00000103888	CEMIP	0.58808	0.545761	2.53832	0.0116806	0.0607736	-3.13088
ENSG00000103932	RPAP1	-0.240354	-0.120438	-1.38412	0.167423	0.339397	-5.2204
ENSG00000103942	HOMER2	-0.34901	-0.531232	-1.92262	0.0555425	0.167564	-4.31591
ENSG00000103966	EHD4	-0.113392	1.13819	-0.950661	0.342596	0.535151	-5.89426
ENSG00000103978	TMEM87A	-0.0341766	1.3677	-0.32727	0.743708	0.851264	-6.30191
ENSG00000103994	ZNF106	0.0254041	2.39487	0.250485	0.802396	0.885812	-6.40435
ENSG00000103995	CEP152	-0.350121	-0.274588	-1.86918	0.0626417	0.181527	-4.4463
ENSG00000104043	ATP8B4	0.286273	1.43469	1.69824	0.0905741	0.231527	-4.95301
ENSG00000104047	DTWD1	-0.162447	1.07052	-1.0082	0.314228	0.506057	-5.83874
ENSG00000104064	GABPB1	-0.00407211	1.24245	-0.0313685	0.974998	0.986523	-6.34127
ENSG00000104067	TJP1	-0.536541	-0.230895	-2.92943	0.00367528	0.0287139	-2.08517
ENSG00000104081	BMF	0.100988	0.590876	0.604053	0.546298	0.714747	-6.07347
ENSG00000104093	DMXL2	0.353166	3.99617	2.44938	0.0149232	0.0713126	-3.56511
ENSG00000104129	DNAJC17	0.0121871	0.269943	0.0716431	0.942937	0.968061	-6.18791
ENSG00000104131	EIF3J	-0.152997	1.98976	-1.29881	0.195077	0.372448	-5.59549
ENSG00000104133	SPG11	0.127115	3.40182	1.43889	0.1513	0.318792	-5.45728
ENSG00000104142	VPS18	0.0768677	1.57053	0.647916	0.51757	0.690655	-6.17596
ENSG00000104154	SLC30A4	0.206421	0.831032	1.30459	0.193104	0.370188	-5.45435
ENSG00000104164	BLOC1S6	-0.316257	3.5605	-1.76283	0.0790202	0.211379	-4.95858
ENSG00000104177	MYEF2	-0.51198	0.637792	-2.52424	0.0121478	0.0625108	-3.2195
ENSG00000104205	SGK3	-0.0449237	2.33749	-0.347198	0.728703	0.843348	-6.37492
ENSG00000104219	ZDHHC2	-0.0597772	0.761551	-0.349217	0.727189	0.842765	-6.2205
ENSG00000104228	TRIM35	-0.231423	-0.497402	-1.38144	0.168244	0.340431	-5.16235
ENSG00000104267	CA2	-0.349631	-0.0964692	-1.83649	0.0673457	0.190175	-4.53833
ENSG00000104299	INTS9	-0.0604325	0.348953	-0.402644	0.687518	0.817382	-6.13054
ENSG00000104312	RIPK2	0.383544	3.30335	2.67103	0.00800431	0.0475238	-3.01333
ENSG00000104320	NBN	0.563311	4.77274	3.57053	0.000419151	0.007114	-0.367023
ENSG00000104324	CPQ	-0.0989658	2.63615	-0.742206	0.458585	0.638439	-6.17954
ENSG00000104325	DECR1	-0.0660763	3.06534	-0.523347	0.601147	0.756802	-6.32751
ENSG00000104331	IMPAD1	-0.253382	0.542149	-1.69254	0.0916547	0.233199	-4.87806
ENSG00000104343	UBE2W	0.193443	2.06742	1.70848	0.0886546	0.22846	-4.99476
ENSG00000104365	IKBKB	0.0270351	2.9271	0.338019	0.735602	0.846637	-6.4029
ENSG00000104375	STK3	0.033519	1.95101	0.259731	0.795262	0.882323	-6.37253
ENSG00000104388	RAB2A	-0.0186778	2.97024	-0.176156	0.860299	0.922123	-6.44479
ENSG00000104408	EIF3E	-0.107651	2.48486	-0.795724	0.426866	0.613217	-6.13356
ENSG00000104412	EMC2	0.182935	1.94469	1.27025	0.205049	0.386169	-5.61736
ENSG00000104419	NDRG1	0.0507733	4.53731	0.407521	0.683937	0.814667	-6.39091
ENSG00000104432	IL7	0.0242507	0.104474	0.119548	0.904927	0.947872	-6.14936
ENSG00000104447	TRPS1	0.1178	1.76745	0.973037	0.331375	0.522998	-5.92753
ENSG00000104450	SPAG1	-0.0484647	0.0932748	-0.289008	0.772789	0.868088	-6.11404
ENSG00000104472	CHRAC1	-0.081161	0.464927	-0.612656	0.540601	0.710694	-6.04666
ENSG00000104490	NCALD	-0.524926	-0.101796	-2.15737	0.0318278	0.117143	-3.93924
ENSG00000104497	SNX16	0.348819	0.199415	2.50472	0.0128235	0.0647687	-3.18691
ENSG00000104517	UBR5	0.11607	2.11123	1.30429	0.193206	0.37024	-5.58781
ENSG00000104518	GSDMD	0.382648	2.88227	3.43364	0.000685594	0.00996736	-0.798414
ENSG00000104522	TSTA3	0.0790187	0.986127	0.597561	0.550616	0.717975	-6.13388
ENSG00000104529	EEF1D	-0.0271578	4.9853	-0.335574	0.737443	0.847899	-6.41369
ENSG00000104549	SQLE	-0.155411	0.389779	-1.02062	0.308317	0.500095	-5.72012
ENSG00000104611	SH2D4A	-0.323541	-0.0414795	-1.8775	0.0614895	0.179349	-4.4696
ENSG00000104613	INTS10	-0.221394	1.70826	-1.75966	0.0795574	0.212412	-4.89271
ENSG00000104626	ERI1	0.0835202	1.98773	0.57913	0.562967	0.727479	-6.24391
ENSG00000104660	LEPROTL1	-0.100411	1.76669	-0.773287	0.440005	0.624342	-6.1047
ENSG00000104671	DCTN6	-0.267777	0.74596	-2.10431	0.0362425	0.128335	-4.15579
ENSG00000104687	GSR	0.112499	1.88622	0.96858	0.333591	0.525167	-5.94422
ENSG00000104689	TNFRSF10A	0.0470077	0.94674	0.337982	0.73563	0.846637	-6.24391
ENSG00000104695	PPP2CB	-0.249644	2.04668	-2.37785	0.0180851	0.0807024	-3.68762
ENSG00000104714	ERICH1	0.157788	2.85131	1.22047	0.223312	0.405258	-5.72623
ENSG00000104731	KLHDC4	-0.143269	0.64789	-0.874336	0.382685	0.573125	-5.89455
ENSG00000104738	MCM4	-0.0246798	0.673649	-0.124923	0.900674	0.945631	-6.24526
ENSG00000104756	KCTD9	-0.150214	0.905675	-1.05944	0.290311	0.479661	-5.75902
ENSG00000104763	ASAH1	-0.0139235	5.27505	-0.128388	0.897934	0.944325	-6.45689
ENSG00000104765	BNIP3L	0.0109591	2.44137	0.0856077	0.931839	0.960929	-6.43686
ENSG00000104774	MAN2B1	-0.0431724	3.31832	-0.406843	0.684434	0.814798	-6.38696
ENSG00000104783	KCNN4	0.275754	1.5172	1.82805	0.0686066	0.192356	-4.7409
ENSG00000104804	TULP2	0.45539	1.65362	1.54721	0.122943	0.280095	-5.21303
ENSG00000104805	NUCB1	0.137882	4.32322	1.2678	0.205922	0.387294	-5.68956
ENSG00000104812	GYS1	0.0440106	1.46055	0.344536	0.730702	0.84416	-6.31418
ENSG00000104814	MAP4K1	-0.172657	0.361204	-0.832271	0.405965	0.593543	-5.87461
ENSG00000104823	ECH1	-0.419015	2.09563	-3.34045	0.000950018	0.012133	-1.0822
ENSG00000104824	HNRNPL	0.0626938	3.34449	0.679859	0.497156	0.671883	-6.24143
ENSG00000104825	NFKBIB	0.171586	1.79769	1.6184	0.106701	0.257031	-5.12081
ENSG00000104852	SNRNP70	-0.112739	2.70497	-1.02912	0.304311	0.495697	-5.93513
ENSG00000104853	CLPTM1	-0.135598	2.0937	-1.49612	0.135748	0.298815	-5.33129
ENSG00000104856	RELB	0.223254	3.31905	1.92697	0.0549955	0.166526	-4.65908
ENSG00000104859	CLASRP	0.225344	2.5811	2.26159	0.02449	0.0978137	-3.96107
ENSG00000104866	PPP1R37	-0.137627	0.173184	-0.8519	0.394998	0.583049	-5.83935
ENSG00000104870	FCGRT	-0.172069	3.64023	-1.51348	0.131285	0.291881	-5.35506
ENSG00000104872	PIH1D1	-0.029859	0.931747	-0.195365	0.845249	0.913251	-6.29007
ENSG00000104880	ARHGEF18	0.0440117	0.715898	0.349542	0.726945	0.842765	-6.21098
ENSG00000104885	DOT1L	-0.016785	2.99349	-0.128315	0.897992	0.944325	-6.45263
ENSG00000104886	PLEKHJ1	0.213486	1.4314	1.80657	0.0719034	0.198516	-4.77879
ENSG00000104894	CD37	0.51368	4.93732	4.69593	4.16185e-06	0.000301018	3.92005
ENSG00000104897	SF3A2	-0.0931254	1.31884	-0.803504	0.422365	0.609091	-6.0401
ENSG00000104903	LYL1	0.246482	1.14378	1.82439	0.0691589	0.193574	-4.70751
ENSG00000104904	OAZ1	0.109311	6.53092	1.44164	0.15052	0.317967	-5.42912
ENSG00000104907	TRMT1	-0.202958	0.190652	-1.20327	0.22989	0.412963	-5.50242
ENSG00000104915	STX10	0.441072	2.03044	3.50137	0.000538478	0.00850846	-0.542952
ENSG00000104918	RETN	0.476729	2.37649	1.79891	0.0731089	0.200861	-4.84064
ENSG00000104936	DMPK	-0.455258	-0.346545	-2.42419	0.0159761	0.0740785	-3.33379
ENSG00000104946	TBC1D17	0.238621	1.66863	1.93748	0.0536925	0.164645	-4.5526
ENSG00000104951	IL4I1	0.680554	2.42266	3.51756	0.000507989	0.00818436	-0.498971
ENSG00000104957	CCDC130	0.0191724	1.19749	0.192297	0.847649	0.914439	-6.32071
ENSG00000104960	PTOV1	0.0386166	1.90883	0.347791	0.728259	0.843093	-6.3457
ENSG00000104964	TLE5	-0.228178	3.21899	-1.39067	0.165429	0.33737	-5.52192
ENSG00000104969	SGTA	0.0888963	1.67361	0.934152	0.35103	0.543111	-5.9587
ENSG00000104972	LILRB1	0.406132	3.563	2.30904	0.0216694	0.0902341	-3.87877
ENSG00000104973	MED25	0.0596287	2.30993	0.61236	0.540796	0.710856	-6.2467
ENSG00000104974	LILRA1	0.692757	1.42116	3.88291	0.000128815	0.00333402	0.810831
ENSG00000104976	SNAPC2	0.21696	-0.0547725	1.38353	0.167604	0.33964	-5.21805
ENSG00000104979	C19orf53	-0.203234	1.62721	-1.5531	0.12153	0.278409	-5.21533
ENSG00000104980	TIMM44	-0.253476	0.517154	-1.70536	0.0892358	0.229357	-4.85185
ENSG00000104983	CCDC61	-0.0932001	-0.626013	-0.536684	0.591912	0.749908	-5.88912
ENSG00000104998	IL27RA	0.190258	-0.0790014	1.58982	0.113004	0.265873	-4.90858
ENSG00000105053	VRK3	-0.0789071	2.38475	-0.9723	0.331741	0.523342	-5.97634
ENSG00000105058	FAM32A	0.323772	1.84408	2.74159	0.00650783	0.041747	-2.7707
ENSG00000105063	PPP6R1	0.0440804	2.62476	0.496285	0.620083	0.768004	-6.32522
ENSG00000105085	MED26	-0.0696553	0.00864889	-0.468134	0.640053	0.782499	-6.04725
ENSG00000105122	RASAL3	0.498722	1.6885	3.28853	0.00113582	0.0137022	-1.19972
ENSG00000105127	AKAP8	0.144746	0.524342	1.31688	0.188956	0.365865	-5.39798
ENSG00000105135	ILVBL	-0.160313	-0.11409	-0.996972	0.319639	0.511355	-5.6537
ENSG00000105171	POP4	0.0308943	1.10689	0.2254	0.821832	0.898347	-6.29501
ENSG00000105176	URI1	0.0345363	0.712806	0.209443	0.834255	0.905121	-6.24413
ENSG00000105185	PDCD5	-0.338958	0.82051	-1.84098	0.0666816	0.188951	-4.67004
ENSG00000105186	ANKRD27	0.0393891	0.545864	0.336551	0.736707	0.847313	-6.18115
ENSG00000105193	RPS16	0.0455971	5.19529	0.350871	0.725949	0.842255	-6.40653
ENSG00000105197	TIMM50	-0.538133	1.19689	-3.76973	0.000199331	0.00436047	0.387086
ENSG00000105202	FBL	-0.167055	1.42144	-1.13604	0.25691	0.443764	-5.74351
ENSG00000105220	GPI	-0.303018	2.90554	-2.51337	0.0125199	0.0637261	-3.40226
ENSG00000105221	AKT2	0.111803	2.93806	1.30044	0.194521	0.371818	-5.63082
ENSG00000105223	PLD3	-0.437219	2.82491	-3.23836	0.00134693	0.0151016	-1.41881
ENSG00000105229	PIAS4	0.106591	1.32899	0.748727	0.45465	0.635645	-6.07939
ENSG00000105245	NUMBL	-0.457311	-0.244093	-2.74925	0.00636174	0.0411195	-2.55764
ENSG00000105246	EBI3	0.781993	0.279094	3.11084	0.00205817	0.0195755	-1.58412
ENSG00000105248	YJU2	0.192815	-0.124336	1.45041	0.148063	0.314862	-5.09253
ENSG00000105254	TBCB	-0.0391907	2.09462	-0.394653	0.693399	0.821003	-6.34313
ENSG00000105258	POLR2I	-0.163556	0.518198	-0.704593	0.481649	0.658426	-6.01193
ENSG00000105281	SLC1A5	-0.0365895	0.777248	-0.262235	0.793333	0.881662	-6.24883
ENSG00000105287	PRKD2	0.182593	3.22341	1.43029	0.153748	0.321609	-5.46522
ENSG00000105289	TJP3	-0.101005	0.0339976	-0.437055	0.662408	0.798691	-6.07334
ENSG00000105290	APLP1	0.061357	0.0350821	0.251294	0.801771	0.88552	-6.13489
ENSG00000105321	CCDC9	0.0561666	2.32284	0.471658	0.637538	0.780491	-6.3223
ENSG00000105323	HNRNPUL1	-0.0514167	2.85095	-0.531372	0.595582	0.753104	-6.31728
ENSG00000105325	FZR1	0.012247	1.73364	0.12095	0.903818	0.947315	-6.3858
ENSG00000105327	BBC3	-0.0568564	1.35692	-0.350518	0.726214	0.842329	-6.30682
ENSG00000105329	TGFB1	0.297358	3.98637	2.7288	0.00675887	0.0428035	-2.87328
ENSG00000105339	DENND3	0.362253	5.36272	2.43335	0.0155857	0.0727869	-3.59583
ENSG00000105341	DMAC2	-0.1351	0.480412	-1.13723	0.256413	0.443141	-5.61157
ENSG00000105352	CEACAM4	0.449629	1.55285	2.32306	0.0208925	0.0880375	-3.74943
ENSG00000105355	PLIN3	0.0609358	3.12603	0.660967	0.509177	0.682782	-6.24827
ENSG00000105357	MYH14	-0.466648	0.699049	-1.93103	0.0544882	0.165936	-4.50223
ENSG00000105364	MRPL4	-0.421934	-0.0488486	-2.94187	0.00353517	0.0280873	-2.06945
ENSG00000105372	RPS19	-0.00987786	4.97595	-0.0687645	0.945226	0.969251	-6.46699
ENSG00000105373	NOP53	-0.220782	2.5086	-1.83269	0.0679105	0.19126	-4.81293
ENSG00000105374	NKG7	0.985979	2.77324	4.25341	2.8732e-05	0.00116875	2.13908
ENSG00000105379	ETFB	-0.0064069	1.21712	-0.045926	0.963402	0.979319	-6.33671
ENSG00000105383	CD33	-0.262813	0.0373438	-1.83038	0.0682558	0.191701	-4.56113
ENSG00000105388	CEACAM5	0.782843	1.16576	2.50317	0.0128784	0.0649793	-3.28774
ENSG00000105393	BABAM1	-0.0134157	1.27168	-0.10408	0.917181	0.952196	-6.34231
ENSG00000105397	TYK2	0.107152	3.70396	0.983467	0.326226	0.517713	-5.9991
ENSG00000105401	CDC37	-0.141609	3.43854	-1.40495	0.161143	0.331653	-5.50662
ENSG00000105402	NAPA	0.344955	4.65805	3.12295	0.00197809	0.0190752	-1.77769
ENSG00000105404	RABAC1	0.108861	2.57437	0.845607	0.398494	0.586615	-6.09446
ENSG00000105438	KDELR1	-0.0852282	1.81047	-0.701732	0.483429	0.660222	-6.15898
ENSG00000105443	CYTH2	-0.149679	1.64694	-1.43162	0.153369	0.321397	-5.39316
ENSG00000105483	CARD8	0.268412	3.57675	2.5629	0.0109032	0.0583005	-3.28919
ENSG00000105486	LIG1	-0.15192	0.0898769	-0.776074	0.43836	0.62258	-5.87337
ENSG00000105499	PLA2G4C	-0.181552	1.43939	-0.997603	0.319333	0.511235	-5.88375
ENSG00000105501	SIGLEC5	0.848372	2.45794	4.06447	6.25955e-05	0.00203388	1.42053
ENSG00000105514	RAB3D	0.587304	1.97462	3.71466	0.00024559	0.00499911	0.178004
ENSG00000105518	TMEM205	-0.0358483	0.706903	-0.259989	0.795063	0.882323	-6.24234
ENSG00000105519	CAPS	-0.889801	1.19738	-3.11424	0.00203537	0.0194	-1.73274
ENSG00000105520	PLPPR2	0.369865	1.9601	2.59367	0.00999516	0.0549065	-3.15506
ENSG00000105523	FAM83E	-0.172006	-0.413408	-0.795671	0.426897	0.613217	-5.77681
ENSG00000105556	MIER2	-0.120303	0.0741403	-0.768312	0.442949	0.62627	-5.87939
ENSG00000105559	PLEKHA4	-0.52408	0.206789	-3.05889	0.0024367	0.0217469	-1.778
ENSG00000105568	PPP2R1A	-0.142203	2.47199	-1.5167	0.130471	0.290625	-5.32267
ENSG00000105576	TNPO2	-0.187129	1.30327	-1.67766	0.0945303	0.237411	-4.99466
ENSG00000105583	WDR83OS	0.122015	1.66818	0.659539	0.510092	0.683455	-6.16426
ENSG00000105607	GCDH	-0.350881	-0.10486	-2.10315	0.0363452	0.128513	-4.03712
ENSG00000105609	LILRB5	-0.124659	-0.0299337	-1.05296	0.293265	0.483082	-5.60045
ENSG00000105612	DNASE2	0.0893939	1.27224	0.591998	0.55433	0.719992	-6.1648
ENSG00000105618	PRPF31	-0.131937	0.213272	-1.05445	0.292588	0.482209	-5.65008
ENSG00000105619	TFPT	0.0340835	-0.0436818	0.218354	0.827312	0.901091	-6.09835
ENSG00000105639	JAK3	0.609058	3.8413	4.2151	3.37223e-05	0.00130181	1.9643
ENSG00000105640	RPL18A	-0.115984	4.54094	-0.762267	0.446542	0.629227	-6.18823
ENSG00000105643	ARRDC2	0.159706	2.44023	1.19303	0.233867	0.417561	-5.74341
ENSG00000105647	PIK3R2	0.00129956	0.0243243	0.00677294	0.994601	0.997235	-6.15228
ENSG00000105655	ISYNA1	0.329167	0.128223	1.90832	0.0573726	0.171232	-4.41789
ENSG00000105656	ELL	0.179146	2.87112	1.43375	0.152759	0.320837	-5.45254
ENSG00000105669	COPE	0.113596	3.39906	1.23131	0.21924	0.401631	-5.72765
ENSG00000105671	DDX49	0.0151649	1.04702	0.113433	0.909768	0.94985	-6.31359
ENSG00000105676	ARMC6	0.00272137	0.0553404	0.0199652	0.984085	0.991699	-6.14651
ENSG00000105677	TMEM147	-0.0998968	0.53146	-0.619304	0.53622	0.70758	-6.05748
ENSG00000105697	HAMP	0.567367	1.51779	2.14932	0.0324661	0.118853	-4.10129
ENSG00000105698	USF2	0.231639	3.7414	2.05473	0.0408325	0.13765	-4.41918
ENSG00000105699	LSR	-0.168432	0.675767	-0.912457	0.362313	0.553822	-5.87559
ENSG00000105700	KXD1	-0.184331	2.19312	-1.94898	0.0522962	0.162194	-4.58568
ENSG00000105701	FKBP8	0.116885	3.5409	1.15578	0.248755	0.435023	-5.8175
ENSG00000105705	SUGP1	-0.029011	0.873121	-0.227962	0.819842	0.897024	-6.26189
ENSG00000105707	HPN	0.378449	0.700997	1.74394	0.0822676	0.217466	-4.79125
ENSG00000105711	SCN1B	0.3009	1.80876	1.50129	0.134407	0.297126	-5.29562
ENSG00000105722	ERF	0.0157599	1.90158	0.107967	0.9141	0.951506	-6.40203
ENSG00000105723	GSK3A	0.156493	1.84508	1.47464	0.141432	0.306124	-5.33878
ENSG00000105726	ATP13A1	0.0224648	1.72569	0.180903	0.856574	0.919662	-6.36817
ENSG00000105738	SIPA1L3	-0.117983	1.12733	-0.700827	0.483993	0.660533	-6.09366
ENSG00000105755	ETHE1	-0.330902	0.425476	-2.08333	0.0381281	0.132568	-4.15697
ENSG00000105771	SMG9	-0.388178	2.2272	-3.07872	0.00228522	0.0209068	-1.87935
ENSG00000105778	AVL9	0.266785	2.04218	2.70614	0.00722479	0.0446178	-2.8785
ENSG00000105792	CFAP69	-0.20945	0.242821	-1.21488	0.225435	0.407787	-5.48277
ENSG00000105808	RASA4	-0.454475	1.15902	-2.55783	0.0110596	0.058722	-3.20575
ENSG00000105810	CDK6	-0.0847064	-0.174444	-0.588883	0.556414	0.722319	-5.94307
ENSG00000105819	PMPCB	0.0128047	0.725212	0.138075	0.89028	0.940133	-6.25584
ENSG00000105821	DNAJC2	-0.0686328	0.504741	-0.597575	0.550607	0.717975	-6.06842
ENSG00000105835	NAMPT	0.169177	9.03191	1.18539	0.236869	0.420511	-5.70574
ENSG00000105851	PIK3CG	0.416706	1.59847	3.04303	0.00256448	0.022641	-1.92479
ENSG00000105854	PON2	-0.294019	-0.409493	-1.58103	0.115001	0.26922	-4.8933
ENSG00000105855	ITGB8	-0.367458	1.5726	-2.3278	0.0206354	0.0875279	-3.77408
ENSG00000105856	HBP1	0.288976	3.42244	2.90812	0.00392727	0.029969	-2.38662
ENSG00000105866	SP4	-0.190317	-0.244048	-1.06035	0.289901	0.479225	-5.56426
ENSG00000105875	WDR91	-0.0961497	1.15046	-0.594002	0.55299	0.719392	-6.16261
ENSG00000105877	DNAH11	-0.307851	1.48446	-1.30951	0.191435	0.368402	-5.54952
ENSG00000105879	CBLL1	0.408548	0.646249	2.72736	0.0067875	0.0428583	-2.6845
ENSG00000105887	MTPN	0.116906	3.38259	1.16295	0.245841	0.432154	-5.8067
ENSG00000105928	GSDME	-0.124061	-0.154518	-0.680036	0.497044	0.671825	-5.90167
ENSG00000105939	ZC3HAV1	0.707992	2.89566	3.86965	0.00013565	0.00344532	0.694872
ENSG00000105953	OGDH	0.078264	2.54109	0.898172	0.369865	0.560837	-6.04776
ENSG00000105963	ADAP1	-0.258207	2.90759	-1.76387	0.0788448	0.211188	-4.94531
ENSG00000105967	TFEC	0.394435	2.71132	1.94228	0.0531058	0.163879	-4.60208
ENSG00000105968	H2AZ2	-0.0349603	1.99237	-0.290106	0.77195	0.867835	-6.37306
ENSG00000105976	MET	0.155096	0.307854	0.853501	0.394111	0.582439	-5.84512
ENSG00000105983	LMBR1	-0.0155309	1.82164	-0.139162	0.889422	0.939529	-6.39348
ENSG00000105993	DNAJB6	0.0716719	3.9583	0.95965	0.338059	0.530166	-6.02391
ENSG00000106003	LFNG	0.081461	1.99979	0.649928	0.516272	0.68939	-6.2024
ENSG00000106009	BRAT1	0.0860116	0.333361	0.699713	0.484687	0.660839	-5.96189
ENSG00000106012	IQCE	-0.0546065	1.28388	-0.455476	0.64912	0.788881	-6.25169
ENSG00000106028	SSBP1	-0.104699	1.49618	-0.839146	0.402103	0.589999	-6.02864
ENSG00000106052	TAX1BP1	0.00464697	2.77262	0.0464139	0.963013	0.979212	-6.45187
ENSG00000106066	CPVL	-0.2916	1.66638	-2.19265	0.0291556	0.110262	-4.06217
ENSG00000106069	CHN2	-0.321591	-0.0356376	-1.7759	0.0768345	0.207563	-4.64109
ENSG00000106070	GRB10	0.127661	1.81396	0.65919	0.510315	0.683662	-6.18259
ENSG00000106077	ABHD11	-0.273492	0.0706342	-1.54615	0.123197	0.28021	-5.0235
ENSG00000106089	STX1A	0.0547906	0.388929	0.290944	0.77131	0.867782	-6.185
ENSG00000106100	NOD1	-0.129725	-0.255958	-0.766253	0.444171	0.62696	-5.79667
ENSG00000106105	GARS1	0.0425434	2.42524	0.357867	0.720713	0.83941	-6.37542
ENSG00000106144	CASP2	0.0655741	0.207645	0.539041	0.590287	0.748523	-6.02375
ENSG00000106153	CHCHD2	0.0342081	3.45938	0.294668	0.768466	0.866294	-6.4272
ENSG00000106211	HSPB1	-0.0854217	3.67469	-0.36352	0.716491	0.836465	-6.40819
ENSG00000106244	PDAP1	0.156999	3.01206	1.26459	0.20707	0.388329	-5.67833
ENSG00000106245	BUD31	0.0885346	2.74976	0.750231	0.453746	0.63513	-6.17592
ENSG00000106258	CYP3A5	-0.781835	-0.0183115	-4.68258	4.42123e-06	0.000315381	3.95019
ENSG00000106261	ZKSCAN1	0.0704811	1.74357	0.728596	0.466858	0.644747	-6.13361
ENSG00000106263	EIF3B	-0.249883	1.55724	-2.17118	0.0307571	0.114383	-4.10593
ENSG00000106266	SNX8	0.0569676	2.57633	0.389915	0.696896	0.823436	-6.3701
ENSG00000106268	NUDT1	0.0598715	0.731829	0.236076	0.813546	0.893014	-6.25758
ENSG00000106290	TAF6	-0.0295235	0.489304	-0.195791	0.844915	0.913139	-6.20296
ENSG00000106330	MOSPD3	0.0683525	-0.339988	0.436706	0.662661	0.798691	-5.96886
ENSG00000106344	RBM28	-0.317554	0.510606	-2.43581	0.0154825	0.0725359	-3.4145
ENSG00000106346	USP42	0.220587	0.267902	1.85256	0.0649982	0.185893	-4.52542
ENSG00000106348	IMPDH1	0.0310917	3.2916	0.26459	0.79152	0.880918	-6.43296
ENSG00000106367	AP1S1	-0.178123	0.0882901	-1.1844	0.237258	0.421068	-5.49357
ENSG00000106392	C1GALT1	0.253721	2.13598	1.81844	0.0700655	0.194948	-4.80554
ENSG00000106397	PLOD3	-0.380715	1.78703	-2.96627	0.00327436	0.0265509	-2.17808
ENSG00000106399	RPA3	0.0660056	-0.150705	0.356148	0.721998	0.840112	-6.0309
ENSG00000106400	ZNHIT1	0.0513704	1.96916	0.508056	0.611814	0.763624	-6.28216
ENSG00000106415	GLCCI1	-0.211149	0.0133393	-1.34692	0.179096	0.352934	-5.28279
ENSG00000106459	NRF1	0.266043	0.0861707	2.08114	0.03833	0.132811	-4.08055
ENSG00000106460	TMEM106B	-0.28128	0.699081	-2.29664	0.0223776	0.0919927	-3.74774
ENSG00000106462	EZH2	0.414096	0.384608	2.46358	0.0143573	0.06993	-3.28389
ENSG00000106541	AGR2	0.198309	1.86054	0.649608	0.516478	0.689571	-6.18961
ENSG00000106546	AHR	-0.0864277	2.31851	-0.603016	0.546986	0.715458	-6.2546
ENSG00000106554	CHCHD3	-0.263536	0.502281	-2.09361	0.0371938	0.1305	-4.14014
ENSG00000106560	GIMAP2	0.29762	1.30643	1.54774	0.122815	0.280053	-5.15744
ENSG00000106565	TMEM176B	0.417051	2.15408	1.96352	0.0505747	0.158806	-4.53591
ENSG00000106588	PSMA2	0.122049	1.64476	0.767388	0.443497	0.626545	-6.08685
ENSG00000106591	MRPL32	-0.202828	-0.0979658	-1.22756	0.220642	0.40276	-5.40379
ENSG00000106603	COA1	-0.147852	1.4246	-1.43542	0.152283	0.320247	-5.36856
ENSG00000106605	BLVRA	-0.258384	1.8988	-1.67761	0.0945399	0.237411	-5.03866
ENSG00000106608	URGCP	-0.0936177	-0.149844	-0.623454	0.533493	0.705022	-5.92906
ENSG00000106609	TMEM248	0.106811	2.20059	1.13535	0.257198	0.443876	-5.79427
ENSG00000106615	RHEB	0.00406467	2.48348	0.0415059	0.966922	0.981884	-6.44108
ENSG00000106617	PRKAG2	-0.0557141	2.41618	-0.55139	0.581806	0.741391	-6.28781
ENSG00000106628	POLD2	-0.388265	0.224114	-2.20258	0.0284396	0.108553	-3.89452
ENSG00000106635	BCL7B	-0.0176562	1.72008	-0.17304	0.862745	0.92364	-6.37603
ENSG00000106636	YKT6	0.140126	1.75182	1.40172	0.162107	0.333009	-5.4319
ENSG00000106638	TBL2	0.10472	1.35807	0.880722	0.379224	0.569468	-5.97372
ENSG00000106665	CLIP2	-0.192665	0.527816	-1.52469	0.128465	0.288121	-5.12805
ENSG00000106682	EIF4H	0.0505595	3.16258	0.550812	0.582202	0.74171	-6.31497
ENSG00000106683	LIMK1	0.104519	1.43387	1.02727	0.30518	0.496726	-5.84628
ENSG00000106714	CNTNAP3	-0.205303	0.782947	-0.897368	0.370293	0.561313	-5.88838
ENSG00000106723	SPIN1	-0.193105	0.47329	-1.36931	0.172001	0.345335	-5.33305
ENSG00000106733	NMRK1	0.323256	0.936432	2.56138	0.0109498	0.0584012	-3.1427
ENSG00000106780	MEGF9	0.320928	1.92027	2.19075	0.0292941	0.110614	-4.07322
ENSG00000106785	TRIM14	0.0979964	1.58668	0.617852	0.537175	0.708523	-6.1745
ENSG00000106799	TGFBR1	0.251121	2.20987	1.76902	0.0779796	0.209678	-4.9007
ENSG00000106803	SEC61B	-0.0821537	2.57076	-0.590695	0.555201	0.721029	-6.27601
ENSG00000106829	TLE4	0.160929	3.70982	1.72173	0.0862237	0.224665	-5.02733
ENSG00000106853	PTGR1	-0.403913	0.551622	-2.76798	0.0060166	0.0397265	-2.61112
ENSG00000106868	SUSD1	-0.15716	1.22601	-1.37212	0.171123	0.344388	-5.42965
ENSG00000106948	AKNA	0.23474	3.58936	2.07185	0.0391947	0.13439	-4.38322
ENSG00000106952	TNFSF8	-0.256402	1.03973	-1.26447	0.207113	0.388329	-5.55935
ENSG00000106976	DNM1	-0.2269	-0.355017	-0.83057	0.406924	0.594768	-5.76495
ENSG00000106991	ENG	0.024308	2.33984	0.148271	0.882236	0.934949	-6.41919
ENSG00000106992	AK1	-0.768595	-0.61446	-3.79784	0.000179018	0.00407394	0.611892
ENSG00000107020	PLGRKT	0.262086	0.734734	1.7597	0.0795507	0.212412	-4.75996
ENSG00000107036	RIC1	0.30239	0.542285	2.42277	0.0160371	0.0742567	-3.40682
ENSG00000107077	KDM4C	0.188601	1.34298	1.63216	0.103769	0.252526	-5.05191
ENSG00000107099	DOCK8	0.34086	4.02242	3.33362	0.000972726	0.0122449	-1.13507
ENSG00000107104	KANK1	-0.0799912	-0.101613	-0.499296	0.617963	0.7673	-6.00962
ENSG00000107140	TESK1	-0.180624	0.888338	-1.41672	0.157676	0.327598	-5.32985
ENSG00000107164	FUBP3	-0.156846	0.754882	-1.16573	0.244715	0.430559	-5.62622
ENSG00000107175	CREB3	-0.171434	0.473206	-1.38958	0.16576	0.337519	-5.30755
ENSG00000107201	DDX58	1.19116	2.53559	4.75926	3.1182e-06	0.000241697	4.22743
ENSG00000107223	EDF1	0.0346342	2.83935	0.21246	0.831903	0.903492	-6.43241
ENSG00000107242	PIP5K1B	-0.159961	-0.11932	-1.0991	0.27267	0.460066	-5.54336
ENSG00000107249	GLIS3	-0.405985	-0.497519	-2.13928	0.033278	0.121172	-3.90808
ENSG00000107262	BAG1	-0.0445177	2.81756	-0.321958	0.747725	0.85408	-6.40118
ENSG00000107263	RAPGEF1	0.0118833	3.84157	0.106422	0.915323	0.951817	-6.46804
ENSG00000107281	NPDC1	0.23313	-0.589922	1.10713	0.269188	0.456877	-5.40872
ENSG00000107290	SETX	0.430176	2.46858	3.5022	0.00053687	0.00850846	-0.561483
ENSG00000107331	ABCA2	0.438916	1.92645	2.97207	0.00321498	0.0261855	-2.14937
ENSG00000107341	UBE2R2	0.160156	2.19259	1.52167	0.129221	0.289047	-5.29609
ENSG00000107371	EXOSC3	-0.129459	0.778383	-0.935729	0.350219	0.54258	-5.86064
ENSG00000107372	ZFAND5	-0.0986552	3.82127	-0.927316	0.354561	0.546384	-6.05337
ENSG00000107404	DVL1	-0.0385932	0.597532	-0.268933	0.788179	0.878094	-6.22112
ENSG00000107438	PDLIM1	-0.794559	0.931664	-3.48561	0.000569796	0.00881929	-0.55668
ENSG00000107521	HPS1	0.279098	2.83543	3.11646	0.00202062	0.0193473	-1.77984
ENSG00000107551	RASSF4	0.0341368	1.84902	0.236134	0.813501	0.893014	-6.3635
ENSG00000107566	ERLIN1	0.0104681	1.06873	0.0644714	0.948641	0.970629	-6.31418
ENSG00000107581	EIF3A	0.00378771	2.32509	0.0345985	0.972425	0.985235	-6.43073
ENSG00000107614	TRDMT1	0.0825129	0.375164	0.488198	0.625792	0.772451	-6.0879
ENSG00000107625	DDX50	-0.0165189	0.405155	-0.144351	0.885327	0.937002	-6.19863
ENSG00000107643	MAPK8	-0.197727	0.948666	-1.57683	0.115965	0.270704	-5.10685
ENSG00000107651	SEC23IP	-0.113962	1.26408	-0.862484	0.389159	0.578858	-5.98456
ENSG00000107669	ATE1	-0.15653	0.0351614	-0.820896	0.412404	0.599395	-5.83754
ENSG00000107736	CDH23	0.202548	1.06387	1.55118	0.121989	0.278946	-5.14644
ENSG00000107738	VSIR	0.493921	4.40029	3.41072	0.000743359	0.0104451	-0.890903
ENSG00000107742	SPOCK2	0.217328	0.330904	1.05892	0.290549	0.479974	-5.64692
ENSG00000107745	MICU1	0.296066	2.07146	3.09661	0.00215604	0.0201367	-1.80578
ENSG00000107758	PPP3CB	0.149351	0.889324	1.25082	0.212045	0.393367	-5.52418
ENSG00000107771	CCSER2	0.11066	1.18889	1.00982	0.313454	0.505193	-5.83028
ENSG00000107796	ACTA2	0.171967	0.181434	0.961907	0.336926	0.529061	-5.69675
ENSG00000107798	LIPA	0.278827	3.18045	1.19181	0.234346	0.417691	-5.75949
ENSG00000107819	SFXN3	-0.261389	1.52611	-2.27199	0.0238454	0.0959088	-3.88424
ENSG00000107829	FBXW4	-0.330379	0.930787	-2.64334	0.00867168	0.0500669	-2.96228
ENSG00000107854	TNKS2	0.36712	1.34306	2.79925	0.00547824	0.0375019	-2.57007
ENSG00000107862	GBF1	0.0568797	0.738489	0.561724	0.574754	0.736187	-6.10893
ENSG00000107863	ARHGAP21	-0.268085	1.43998	-2.06653	0.0396979	0.135314	-4.30774
ENSG00000107874	CUEDC2	-0.00686509	0.572132	-0.0570969	0.954509	0.97399	-6.24351
ENSG00000107897	ACBD5	0.319379	0.191656	2.61274	0.00946705	0.052801	-2.91503
ENSG00000107902	LHPP	-0.349679	-0.204717	-1.98881	0.0476957	0.152914	-4.24379
ENSG00000107929	LARP4B	0.220503	2.88571	2.28487	0.0230686	0.0938267	-3.92072
ENSG00000107937	GTPBP4	-0.123215	0.464315	-0.895841	0.371107	0.562114	-5.85018
ENSG00000107938	EDRF1	0.106287	0.0327154	0.845173	0.398736	0.586808	-5.78673
ENSG00000107949	BCCIP	-0.32689	0.0816015	-2.34314	0.0198219	0.0853574	-3.56253
ENSG00000107959	PITRM1	-0.217448	0.85265	-1.73283	0.084227	0.221182	-4.84925
ENSG00000107968	MAP3K8	-0.0172518	3.76525	-0.148149	0.882332	0.934949	-6.46284
ENSG00000108010	GLRX3	-0.305341	2.15671	-2.17388	0.0305522	0.113923	-4.14147
ENSG00000108021	TASOR2	0.0317939	1.27269	0.230798	0.81764	0.895373	-6.31391
ENSG00000108039	XPNPEP1	-0.0325672	1.69161	-0.256207	0.797979	0.883214	-6.35652
ENSG00000108061	SHOC2	0.14782	3.16885	1.4859	0.138429	0.302851	-5.38581
ENSG00000108064	TFAM	0.124523	0.251166	0.888897	0.374821	0.565291	-5.79664
ENSG00000108094	CUL2	0.0334908	0.435448	0.233797	0.815313	0.894156	-6.18324
ENSG00000108100	CCNY	-0.0444948	1.75204	-0.363538	0.716478	0.836465	-6.32939
ENSG00000108106	UBE2S	0.288901	1.87441	1.61562	0.107302	0.257687	-5.12687
ENSG00000108107	RPL28	0.128848	5.59941	1.00275	0.316846	0.508613	-5.97008
ENSG00000108175	ZMIZ1	-0.034028	3.45964	-0.248684	0.803787	0.886945	-6.43984
ENSG00000108179	PPIF	0.391574	5.77607	2.49302	0.0132439	0.0664152	-3.44894
ENSG00000108187	PBLD	-0.0392848	0.340668	-0.308427	0.757987	0.860526	-6.16328
ENSG00000108219	TSPAN14	0.28415	3.9329	2.67303	0.00795798	0.0473343	-3.01701
ENSG00000108244	KRT23	0.088053	2.38478	0.515339	0.606723	0.760652	-6.30023
ENSG00000108256	NUFIP2	0.261636	2.90205	2.13774	0.0334038	0.121428	-4.23232
ENSG00000108262	GIT1	-0.0230598	0.801667	-0.177116	0.859545	0.921818	-6.26233
ENSG00000108298	RPL19	-0.158051	4.7044	-1.20215	0.230322	0.413436	-5.76546
ENSG00000108312	UBTF	-0.137486	1.67126	-1.34911	0.178393	0.352206	-5.50703
ENSG00000108342	CSF3	-0.149133	0.312875	-0.564066	0.573161	0.73496	-6.06972
ENSG00000108344	PSMD3	0.154931	1.50346	1.25369	0.211001	0.392348	-5.59865
ENSG00000108349	CASC3	-0.0316516	3.1434	-0.364507	0.715755	0.836208	-6.40022
ENSG00000108352	RAPGEFL1	0.0177092	0.486881	0.122867	0.902301	0.946229	-6.21969
ENSG00000108387	SEPTIN4	-0.139082	1.02161	-0.825015	0.410066	0.597932	-5.98939
ENSG00000108389	MTMR4	-0.207798	1.18356	-1.561	0.119653	0.275596	-5.16626
ENSG00000108395	TRIM37	-0.152838	-0.0747432	-0.900534	0.36861	0.559709	-5.74739
ENSG00000108405	P2RX1	0.504221	1.66549	2.78715	0.00568108	0.038489	-2.63553
ENSG00000108406	DHX40	-0.133661	0.8582	-1.08272	0.279863	0.467981	-5.72952
ENSG00000108423	TUBD1	-0.0316849	-0.228606	-0.198147	0.843074	0.912002	-6.08319
ENSG00000108424	KPNB1	0.23611	4.2166	2.41984	0.0161641	0.0745638	-3.63515
ENSG00000108433	GOSR2	-0.0390368	1.14429	-0.378433	0.705396	0.830232	-6.25799
ENSG00000108439	PNPO	-0.294589	-0.215737	-2.06349	0.0399877	0.13581	-4.09349
ENSG00000108443	RPS6KB1	-0.217561	1.25543	-1.77348	0.0772365	0.208135	-4.83567
ENSG00000108465	CDK5RAP3	0.0964511	2.57083	1.00074	0.317819	0.509545	-5.95405
ENSG00000108468	CBX1	-0.102178	0.407346	-0.873988	0.382874	0.57332	-5.84847
ENSG00000108469	RECQL5	0.0148298	0.866776	0.100548	0.919981	0.953896	-6.28518
ENSG00000108474	PIGL	-0.332886	1.04924	-1.52928	0.127323	0.286343	-5.20624
ENSG00000108479	GALK1	0.0807488	0.766687	0.60469	0.545875	0.714383	-6.0923
ENSG00000108509	CAMTA2	-0.0574777	2.48486	-0.492734	0.622587	0.770201	-6.32498
[truncated: 7,845 more rows]

## Sheet: C (IPC v CTRL)
ENSEMBL_ID	gene_symbol	logFC	AveExpr	t	P.Value	adj.P.Val	B
ENSG00000000419	DPM1	0.366035	1.11361	1.9463	0.0539182	0.559155	-3.94171
ENSG00000000938	FGR	0.0924059	5.78146	0.512051	0.609541	0.917375	-5.52143
ENSG00000001036	FUCA2	0.0657829	1.20057	0.37498	0.708326	0.94593	-5.48122
ENSG00000001084	GCLC	0.177713	1.46933	0.680352	0.497571	0.877007	-5.36511
ENSG00000001167	NFYA	0.103835	1.1787	0.547382	0.585117	0.911817	-5.41033
ENSG00000001626	CFTR	0.09845	1.89711	0.232524	0.816521	0.967131	-5.56683
ENSG00000001629	ANKIB1	0.0586997	1.23506	0.302126	0.763071	0.957328	-5.50598
ENSG00000001630	CYP51A1	-0.0799012	0.586696	-0.373258	0.709604	0.94593	-5.41824
ENSG00000001631	KRIT1	-0.402881	1.14427	-2.44341	0.0159807	0.425172	-3.05504
ENSG00000002016	RAD52	0.0276105	-0.0676963	0.132132	0.895097	0.98203	-5.38009
ENSG00000002330	BAD	-0.137533	0.997579	-0.6287	0.530721	0.891226	-5.35598
ENSG00000002549	LAP3	0.244268	3.03733	0.944753	0.346652	0.813646	-5.24364
ENSG00000002586	CD99	-0.198978	3.52446	-1.10689	0.270517	0.778125	-5.10406
ENSG00000002587	HS3ST1	-0.0547175	0.34097	-0.190355	0.849347	0.972528	-5.43114
ENSG00000002822	MAD1L1	0.0181969	2.14751	0.0845236	0.932779	0.988617	-5.60478
ENSG00000002834	LASP1	0.0116393	3.98687	0.0837839	0.933366	0.988707	-5.6437
ENSG00000002919	SNX11	0.0547554	1.8101	0.32506	0.745693	0.953176	-5.5432
ENSG00000002933	TMEM176A	0.387275	1.50825	1.30663	0.193795	0.722441	-4.82921
ENSG00000003056	M6PR	-0.212112	3.55088	-1.01072	0.314151	0.797055	-5.19411
ENSG00000003147	ICA1	0.201419	0.516028	0.784842	0.434068	0.853398	-5.20454
ENSG00000003393	ALS2	0.32017	0.53868	1.75916	0.0810582	0.598473	-4.19558
ENSG00000003400	CASP10	0.272096	1.27571	1.34027	0.182649	0.715313	-4.77908
ENSG00000003402	CFLAR	0.374121	6.18288	2.23438	0.0272788	0.479669	-3.48162
ENSG00000003436	TFPI	0.0374652	0.910923	0.173122	0.862842	0.974509	-5.49759
ENSG00000003509	NDUFAF7	-0.138634	-0.0728041	-0.846235	0.399079	0.840982	-5.10544
ENSG00000003756	RBM5	0.0393106	3.80766	0.306047	0.76009	0.955354	-5.60464
ENSG00000004059	ARF5	0.0406042	2.96424	0.233115	0.816063	0.967131	-5.61377
ENSG00000004142	POLDIP2	0.0135517	0.579089	0.0633809	0.949567	0.991761	-5.47403
ENSG00000004399	PLXND1	-0.331242	2.97418	-1.63234	0.105186	0.643952	-4.47387
ENSG00000004455	AK2	0.177285	2.44626	1.07742	0.283419	0.781534	-5.11429
ENSG00000004468	CD38	0.424605	0.609306	1.75683	0.0814552	0.598473	-4.19997
ENSG00000004478	FKBP4	0.10522	2.08174	0.484367	0.628994	0.92443	-5.50126
ENSG00000004487	KDM1A	-0.464997	0.50204	-2.51067	0.0133585	0.408333	-2.9212
ENSG00000004534	RBM6	0.0702903	2.00546	0.528445	0.598151	0.916243	-5.47875
ENSG00000004660	CAMKK1	-0.288114	0.227866	-1.50505	0.134895	0.679931	-4.51475
ENSG00000004700	RECQL	-0.159807	0.396656	-0.70129	0.484458	0.872352	-5.255
ENSG00000004766	VPS50	0.130916	0.455977	0.602699	0.547828	0.899841	-5.3054
ENSG00000004779	NDUFAB1	-0.383301	1.13212	-1.49139	0.13844	0.683453	-4.59861
ENSG00000004838	ZMYND10	-0.338693	1.21895	-0.892673	0.37379	0.828174	-5.20726
ENSG00000004864	SLC25A13	0.717819	2.56538	2.52667	0.0127948	0.405602	-2.8961
ENSG00000004866	ST7	-0.417161	0.530393	-1.51771	0.131674	0.675304	-4.52448
ENSG00000004897	CDC27	0.0364418	2.07284	0.242122	0.809092	0.965803	-5.57844
ENSG00000004975	DVL2	-0.0796062	1.52997	-0.489354	0.625469	0.92283	-5.46748
ENSG00000005001	PRSS22	0.0822777	0.684825	0.230496	0.818092	0.967768	-5.46466
ENSG00000005007	UPF1	-0.322019	2.68116	-2.27644	0.0245627	0.474508	-3.40088
ENSG00000005020	SKAP2	-0.168229	3.4868	-0.848756	0.39768	0.840618	-5.3264
ENSG00000005022	SLC25A5	-0.229739	2.90328	-1.17385	0.24274	0.763353	-5.0323
ENSG00000005059	MCUB	-0.393183	1.32507	-1.68642	0.0942712	0.624499	-4.34851
ENSG00000005075	POLR2J	-0.160809	1.65796	-0.731373	0.465954	0.866716	-5.3505
ENSG00000005156	LIG3	0.243768	1.46137	1.3716	0.172706	0.711894	-4.75746
ENSG00000005175	RPAP3	-0.12648	0.433728	-0.595005	0.552942	0.901633	-5.31135
ENSG00000005187	ACSM3	0.286287	1.07147	1.0781	0.283118	0.781534	-5.02796
ENSG00000005194	CIAPIN1	-0.0743807	0.288294	-0.317139	0.751681	0.953583	-5.39472
ENSG00000005206	SPPL2B	-0.271842	1.52869	-1.12686	0.262013	0.773996	-5.02637
ENSG00000005238	FAM214B	-0.229944	2.03634	-1.20086	0.232133	0.751684	-4.97789
ENSG00000005302	MSL3	-0.0937878	2.4878	-0.498722	0.618873	0.919309	-5.51194
ENSG00000005339	CREBBP	0.159478	4.53682	0.642557	0.521718	0.886646	-5.46332
ENSG00000005379	TSPOAP1	-0.0620468	1.37755	-0.250577	0.802563	0.965015	-5.53094
ENSG00000005448	WDR54	0.0271461	0.180629	0.0906937	0.927885	0.988617	-5.42201
ENSG00000005483	KMT2E	0.37922	3.78287	2.08516	0.03914	0.522208	-3.75979
ENSG00000005486	RHBDD2	-0.259297	3.21747	-1.46756	0.144797	0.687238	-4.69852
ENSG00000005700	IBTK	-0.15289	0.515131	-0.846331	0.399025	0.840982	-5.17303
ENSG00000005801	ZNF195	-0.130442	0.640057	-0.49838	0.619114	0.919309	-5.37643
ENSG00000005810	MYCBP2	0.0351404	2.07613	0.221891	0.824769	0.968739	-5.58223
ENSG00000005812	FBXL3	-0.0544114	1.4533	-0.271759	0.786267	0.961317	-5.53267
ENSG00000005844	ITGAL	-0.534304	3.07233	-3.20243	0.00173829	0.335208	-1.31365
ENSG00000005884	ITGA3	-0.397001	0.679996	-1.31739	0.190176	0.721103	-4.76975
ENSG00000005889	ZFX	0.0716768	2.38881	0.386451	0.699836	0.944022	-5.555
ENSG00000005893	LAMP2	-0.0481041	3.38486	-0.236665	0.813314	0.966823	-5.61876
ENSG00000006007	GDE1	-0.12645	1.02101	-0.710376	0.478827	0.870787	-5.3119
ENSG00000006015	REX1BD	-0.565503	1.22902	-2.66833	0.00865918	0.382982	-2.59096
ENSG00000006118	TMEM132A	0.275216	1.23264	1.35985	0.176385	0.713658	-4.75432
ENSG00000006125	AP2B1	0.435813	3.22866	2.48095	0.0144658	0.412865	-2.99591
ENSG00000006194	ZNF263	0.0163975	0.428662	0.0925059	0.926448	0.988617	-5.45206
ENSG00000006282	SPATA20	-0.121219	0.776012	-0.723563	0.470719	0.868396	-5.2784
ENSG00000006327	TNFRSF12A	-0.309712	1.52952	-1.02182	0.308887	0.795119	-5.12186
ENSG00000006451	RALA	0.126875	1.91575	0.715668	0.475564	0.870331	-5.37238
ENSG00000006453	BAIAP2L1	0.145908	1.14534	0.792477	0.429621	0.851211	-5.26641
ENSG00000006459	KDM7A	-0.0811236	0.962691	-0.413056	0.680291	0.938133	-5.44634
ENSG00000006530	AGK	-0.0225722	1.44873	-0.121174	0.903752	0.983571	-5.5567
ENSG00000006534	ALDH3B1	-0.457184	2.2183	-1.97704	0.0502919	0.55109	-3.93095
ENSG00000006576	PHTF2	0.152924	0.0321537	0.73766	0.462137	0.864973	-5.17936
ENSG00000006607	FARP2	-0.250562	1.3852	-0.974142	0.331914	0.808899	-5.15336
ENSG00000006634	DBF4	0.173973	-0.219045	0.69036	0.491279	0.874075	-5.17783
ENSG00000006652	IFRD1	0.295953	4.33311	1.2435	0.216069	0.73601	-4.96725
ENSG00000006712	PAF1	0.101971	2.67569	0.692139	0.490165	0.874075	-5.41899
ENSG00000006715	VPS41	-0.0704419	2.19447	-0.404142	0.686816	0.939277	-5.53998
ENSG00000006744	ELAC2	-0.151652	1.04232	-0.745236	0.457562	0.863763	-5.29263
ENSG00000006747	SCIN	0.155399	0.439733	0.609637	0.543236	0.898112	-5.29489
ENSG00000006756	ARSD	-0.409033	0.862527	-2.70211	0.00787195	0.375752	-2.52249
ENSG00000006831	ADIPOR2	0.149334	1.81944	0.965154	0.336377	0.80941	-5.1863
ENSG00000006837	CDKL3	0.0442431	-0.0216692	0.174142	0.862043	0.974509	-5.37842
ENSG00000007047	MARK4	0.0267531	1.89135	0.154814	0.877224	0.977629	-5.58494
ENSG00000007062	PROM1	-0.456847	0.723388	-1.33578	0.184109	0.715313	-4.75398
ENSG00000007080	CCDC124	-0.413447	1.7264	-2.12498	0.0356059	0.510812	-3.66447
ENSG00000007129	CEACAM21	0.0104918	-0.0816409	0.0455845	0.963716	0.99526	-5.38755
ENSG00000007168	PAFAH1B1	-0.00400304	3.56889	-0.0313102	0.975073	0.996588	-5.64507
ENSG00000007174	DNAH9	-0.501265	0.648454	-1.54593	0.124712	0.665282	-4.4983
ENSG00000007202	KIAA0100	-0.102011	2.40098	-0.715523	0.475653	0.870331	-5.3959
ENSG00000007237	AC005747.1	0.226818	3.44932	1.07303	0.285376	0.782162	-5.13685
ENSG00000007264	MATK	0.259866	0.63491	0.934683	0.351798	0.815837	-5.10937
ENSG00000007341	ST7L	0.0558031	0.997455	0.341064	0.733642	0.951637	-5.47062
ENSG00000007392	LUC7L	-0.142028	1.37881	-0.899339	0.370244	0.825465	-5.21279
ENSG00000007516	BAIAP3	-0.586602	1.10543	-1.91486	0.0578512	0.564968	-3.99743
ENSG00000007520	TSR3	-0.0156249	0.902123	-0.0726534	0.942201	0.990286	-5.50929
ENSG00000007541	PIGQ	-0.569365	1.05215	-2.2465	0.0264705	0.478039	-3.42894
ENSG00000007545	CRAMP1	-0.222328	0.234731	-0.849805	0.397098	0.840529	-5.13925
ENSG00000007923	DNAJC11	0.204604	0.726603	0.920774	0.358985	0.820074	-5.13346
ENSG00000007944	MYLIP	0.228461	0.960228	1.00457	0.317092	0.798736	-5.0861
ENSG00000008018	PSMB1	-0.072311	2.33687	-0.306543	0.759714	0.955354	-5.57666
ENSG00000008083	JARID2	0.127721	1.90681	0.648858	0.51765	0.885447	-5.412
ENSG00000008086	CDKL5	0.266486	1.13991	0.991848	0.323235	0.802959	-5.10863
ENSG00000008128	CDK11A	0.173807	2.23872	0.921579	0.358567	0.820074	-5.24169
ENSG00000008130	NADK	0.288319	5.19474	1.45819	0.147358	0.687945	-4.71157
ENSG00000008226	DLEC1	-0.667663	0.683863	-2.63229	0.00957727	0.39258	-2.67217
ENSG00000008256	CYTH3	-0.36693	0.390855	-1.64068	0.103439	0.641217	-4.35525
ENSG00000008282	SYPL1	0.0666377	1.37271	0.400589	0.689423	0.939732	-5.48839
ENSG00000008283	CYB561	-0.384285	0.925326	-1.32329	0.188214	0.720296	-4.78228
ENSG00000008294	SPAG9	0.593758	4.5565	3.2544	0.00147059	0.335208	-1.1754
ENSG00000008323	PLEKHG6	-0.162198	1.83509	-0.709043	0.479651	0.871324	-5.37344
ENSG00000008382	MPND	-0.684068	0.563818	-2.78642	0.00618207	0.374379	-2.34742
ENSG00000008394	MGST1	-0.1409	2.16739	-0.533936	0.594357	0.914625	-5.48682
ENSG00000008438	PGLYRP1	-0.526325	0.975065	-1.65556	0.10038	0.635449	-4.37361
ENSG00000008513	ST3GAL1	0.0861023	3.36275	0.497914	0.619441	0.919309	-5.53396
ENSG00000008516	MMP25	-0.21612	4.33216	-0.601883	0.548369	0.899991	-5.48597
ENSG00000008517	IL32	0.485145	1.71689	1.72263	0.0874886	0.608087	-4.30812
ENSG00000008710	PKD1	-0.45274	2.08289	-1.70604	0.0905449	0.614376	-4.35198
ENSG00000008838	MED24	0.0758403	2.15309	0.361335	0.718474	0.947823	-5.5511
ENSG00000008869	HEATR5B	0.0575415	0.818049	0.275768	0.783193	0.961275	-5.46842
ENSG00000008952	SEC62	0.158238	3.8476	1.09675	0.27491	0.780165	-5.11757
ENSG00000008988	RPS20	-0.233343	5.02468	-1.05152	0.295096	0.78921	-5.15651
ENSG00000009307	CSDE1	-0.0414733	4.00031	-0.264575	0.791783	0.962008	-5.61579
ENSG00000009335	UBE3C	0.0130688	1.44904	0.081176	0.935435	0.988919	-5.56062
ENSG00000009413	REV3L	-0.0719436	1.51568	-0.342836	0.732312	0.951004	-5.51768
ENSG00000009780	FAM76A	0.144743	0.333453	0.722369	0.47145	0.869063	-5.22421
ENSG00000009790	TRAF3IP3	0.132927	2.82711	0.501375	0.617011	0.919117	-5.52339
ENSG00000009830	POMT2	-0.525603	0.599628	-1.79499	0.0751311	0.594328	-4.15519
ENSG00000009844	VTA1	-0.0410156	0.424523	-0.173742	0.862356	0.974509	-5.44331
ENSG00000009954	BAZ1B	-0.101024	0.487684	-0.593188	0.554153	0.902562	-5.31991
ENSG00000010017	RANBP9	0.311194	1.31362	1.46301	0.146035	0.687238	-4.63731
ENSG00000010030	ETV7	0.596954	-0.432384	1.87058	0.0637989	0.572343	-3.99283
ENSG00000010219	DYRK4	0.0575099	0.254281	0.202835	0.839602	0.970304	-5.41321
ENSG00000010244	ZNF207	0.0455136	3.61056	0.255686	0.798624	0.963681	-5.6161
ENSG00000010256	UQCRC1	-0.416949	2.91819	-2.39129	0.0183175	0.441564	-3.17745
ENSG00000010270	STARD3NL	0.128587	1.71524	0.911576	0.36379	0.822357	-5.2226
ENSG00000010278	CD9	-0.533635	3.39629	-1.86052	0.0652199	0.572343	-4.13495
ENSG00000010292	NCAPD2	-0.112361	0.763647	-0.547443	0.585075	0.911817	-5.3702
ENSG00000010295	IFFO1	-0.212065	0.243668	-1.19804	0.233222	0.752682	-4.84963
ENSG00000010310	GIPR	-0.25055	0.301943	-0.995355	0.321534	0.801723	-5.03625
ENSG00000010322	NISCH	-0.145877	1.67305	-0.928205	0.355134	0.819297	-5.20993
ENSG00000010327	STAB1	0.0285463	2.41156	0.117984	0.906274	0.983612	-5.61051
ENSG00000010361	FUZ	-0.213188	0.59806	-0.805088	0.422335	0.848218	-5.21188
ENSG00000010404	IDS	-0.112245	3.6753	-0.881306	0.379885	0.832674	-5.30347
ENSG00000010539	ZNF200	-0.035369	1.32619	-0.199661	0.842078	0.970771	-5.53677
ENSG00000010610	CD4	-0.255433	2.38379	-1.28991	0.199523	0.725138	-4.89239
ENSG00000010626	LRRC23	-0.34576	1.27812	-1.14281	0.255355	0.768212	-4.99605
ENSG00000010671	BTK	-0.126172	1.82023	-0.644631	0.520377	0.886459	-5.41033
ENSG00000010803	SCMH1	0.0384897	0.211068	0.176117	0.860494	0.974509	-5.40791
ENSG00000010810	FYN	0.0237836	1.93593	0.120463	0.904315	0.983571	-5.59043
ENSG00000010818	HIVEP2	0.516976	1.94655	2.66277	0.00879551	0.382982	-2.60262
ENSG00000011007	ELOA	-0.161381	0.552844	-0.807784	0.420787	0.846735	-5.20336
ENSG00000011009	LYPLA2	-0.123567	2.03337	-0.830137	0.408083	0.842527	-5.30416
ENSG00000011021	CLCN6	0.181366	1.23194	1.14781	0.253293	0.767001	-4.98046
ENSG00000011114	BTBD7	-0.122791	1.02345	-0.801422	0.424445	0.849236	-5.25322
ENSG00000011132	APBA3	0.0451752	1.04797	0.27408	0.784487	0.961317	-5.49428
ENSG00000011198	ABHD5	-0.352372	2.83963	-1.75147	0.0823782	0.598473	-4.30044
ENSG00000011243	AKAP8L	-0.0412105	2.26311	-0.269961	0.787646	0.961626	-5.58278
ENSG00000011260	UTP18	0.423738	1.40971	2.54331	0.0122307	0.405602	-2.85397
ENSG00000011275	RNF216	-0.170798	1.10478	-1.0252	0.307297	0.793473	-5.08735
ENSG00000011295	TTC19	0.0961673	1.14833	0.636457	0.525671	0.888514	-5.36108
ENSG00000011304	PTBP1	-0.22846	3.35611	-1.33406	0.184671	0.716554	-4.86225
ENSG00000011405	PIK3C2A	0.233583	0.582134	1.19988	0.232511	0.751919	-4.8718
ENSG00000011422	PLAUR	0.137386	7.49672	0.632523	0.528229	0.889739	-5.44351
ENSG00000011451	WIZ	-0.19662	0.519961	-1.14822	0.253125	0.767001	-4.92369
ENSG00000011454	RABGAP1	0.391929	1.60964	2.67385	0.00852597	0.381499	-2.57837
ENSG00000011485	PPP5C	-0.151934	0.871319	-0.767309	0.44438	0.859756	-5.26213
ENSG00000011523	CEP68	0.201118	1.22453	1.13125	0.26017	0.77172	-4.99449
ENSG00000011566	MAP4K3	-0.121317	1.23402	-0.566731	0.571938	0.907498	-5.40806
ENSG00000011600	TYROBP	-0.304017	6.90527	-2.38056	0.0188348	0.441564	-3.19561
ENSG00000011638	TMEM159	0.0461314	0.519971	0.234197	0.815224	0.967131	-5.44119
ENSG00000012048	BRCA1	-0.121915	0.678912	-0.562562	0.574765	0.908681	-5.35275
ENSG00000012061	ERCC1	0.045771	2.35591	0.296261	0.767535	0.95809	-5.58004
ENSG00000012124	CD22	0.510225	2.38224	1.57815	0.11712	0.659317	-4.53383
ENSG00000012171	SEMA3B	-0.0417686	0.0719299	-0.190468	0.849259	0.972528	-5.39141
ENSG00000012211	PRICKLE3	-0.252664	0.245723	-1.07319	0.285305	0.782162	-4.9667
ENSG00000012223	LTF	-0.12437	1.2504	-0.488877	0.625806	0.922912	-5.44717
ENSG00000012232	EXTL3	-0.355687	1.75539	-1.94768	0.0537501	0.558809	-3.96638
ENSG00000012660	ELOVL5	0.127822	3.15043	0.779474	0.43721	0.85612	-5.37319
ENSG00000012779	ALOX5	-0.265623	5.37048	-1.28552	0.201044	0.725138	-4.91555
ENSG00000012822	CALCOCO1	-0.0433516	2.42154	-0.2549	0.799229	0.963809	-5.59327
ENSG00000012983	MAP4K5	-0.291246	1.42284	-1.30766	0.193447	0.722441	-4.833
ENSG00000013275	PSMC4	-0.0528271	1.96292	-0.332039	0.740429	0.952211	-5.55135
ENSG00000013288	MAN2B2	-0.327805	1.03633	-1.87264	0.0635121	0.572343	-4.05933
ENSG00000013306	SLC25A39	-0.259094	1.88465	-1.25842	0.210645	0.7302	-4.91153
ENSG00000013364	MVP	-0.121049	4.30348	-1.07241	0.285653	0.782189	-5.13996
ENSG00000013374	NUB1	0.387437	2.29414	1.98649	0.0492208	0.548731	-3.91314
ENSG00000013375	PGM3	-0.386147	0.660512	-1.41486	0.159658	0.701015	-4.65748
ENSG00000013441	CLK1	0.167358	3.52414	0.868188	0.386996	0.836332	-5.3127
ENSG00000013561	RNF14	-0.124262	0.858652	-0.738264	0.461772	0.864973	-5.27815
ENSG00000013563	DNASE1L1	-0.283107	1.48305	-1.36985	0.173249	0.711894	-4.76499
ENSG00000013573	DDX11	-0.510107	1.41752	-1.47085	0.143905	0.687238	-4.63962
ENSG00000013583	HEBP1	-0.118065	0.687811	-0.611901	0.541742	0.897707	-5.33111
ENSG00000013588	GPRC5A	-0.322274	1.5395	-0.990585	0.323849	0.803217	-5.15073
ENSG00000013725	CD6	-0.113371	1.50589	-0.503502	0.61552	0.919117	-5.4587
ENSG00000013810	TACC3	-0.128289	2.0387	-0.709641	0.479281	0.871131	-5.38342
ENSG00000014164	ZC3H3	0.134723	1.86966	0.689553	0.491785	0.874075	-5.38595
ENSG00000014216	CAPN1	-0.292692	3.19933	-2.09536	0.0382074	0.520212	-3.73935
ENSG00000014257	ACPP	0.0540808	0.350623	0.23787	0.812381	0.966585	-5.41743
ENSG00000014824	SLC30A9	-0.00510403	0.76735	-0.0290115	0.976903	0.996854	-5.49652
ENSG00000014919	COX15	-0.101261	0.665998	-0.564367	0.57354	0.908144	-5.35492
ENSG00000015133	CCDC88C	-0.0824007	1.65909	-0.391484	0.696123	0.941938	-5.51305
ENSG00000015153	YAF2	0.28857	1.1191	1.36361	0.1752	0.712606	-4.73993
ENSG00000015171	ZMYND11	-0.112332	0.458739	-0.586331	0.558737	0.903545	-5.31955
ENSG00000015285	WAS	-0.188535	3.87085	-1.02897	0.305531	0.793334	-5.17999
ENSG00000015475	BID	0.335985	4.50073	1.62404	0.106949	0.644654	-4.49305
ENSG00000015479	MATR3	0.144673	2.66813	0.919652	0.35957	0.820112	-5.25807
ENSG00000015568	RGPD5	0.155902	3.00503	0.620671	0.535974	0.89373	-5.46748
ENSG00000015676	NUDCD3	-0.375472	1.06129	-1.92853	0.0561127	0.562253	-3.97327
ENSG00000016864	GLT8D1	-0.0661841	0.383162	-0.307062	0.759319	0.955354	-5.41313
ENSG00000017260	ATP2C1	0.0242786	2.29718	0.127003	0.899147	0.98263	-5.60849
ENSG00000017483	SLC38A5	0.166908	-0.696895	0.561583	0.57543	0.90909	-5.17341
ENSG00000017797	RALBP1	-0.15169	1.952	-1.18152	0.239696	0.761263	-4.99479
ENSG00000018189	RUFY3	-0.00218569	1.99589	-0.0112409	0.99105	0.99917	-5.60153
ENSG00000018280	SLC11A1	-0.276356	6.71555	-1.38707	0.16795	0.708202	-4.78746
ENSG00000018510	AGPS	0.0196498	1.27466	0.0902595	0.928229	0.988617	-5.54467
ENSG00000019144	PHLDB1	0.159655	0.961716	0.577444	0.564704	0.905038	-5.37205
ENSG00000019169	MARCO	-0.62482	4.16493	-2.15718	0.0329523	0.503699	-3.62887
ENSG00000019582	CD74	-0.66396	7.45697	-2.29321	0.0235478	0.468293	-3.36424
ENSG00000020577	SAMD4A	-0.189303	0.664612	-0.66706	0.505994	0.880192	-5.29991
ENSG00000020633	RUNX3	0.142391	1.37215	0.625177	0.533023	0.892299	-5.38683
ENSG00000020922	MRE11	-0.144567	0.372423	-0.829458	0.408465	0.842584	-5.16649
ENSG00000021355	SERPINB1	0.275807	5.62845	1.77565	0.0782845	0.598473	-4.26634
ENSG00000021574	SPAST	-0.00469343	1.48505	-0.0333262	0.973469	0.996588	-5.56589
ENSG00000021762	OSBPL5	-0.554981	0.549454	-2.22498	0.0279206	0.479669	-3.45702
ENSG00000022277	RTF2	0.088656	3.5857	0.522557	0.60223	0.917375	-5.52484
ENSG00000022556	NLRP2	-0.202942	0.449419	-0.862116	0.390315	0.838203	-5.15177
ENSG00000022567	SLC45A4	0.194957	2.76657	0.91487	0.362065	0.822285	-5.26448
ENSG00000022840	RNF10	0.0790578	4.52819	0.588104	0.557549	0.903545	-5.49317
ENSG00000023041	ZDHHC6	0.058807	1.01896	0.272543	0.785665	0.961317	-5.49103
ENSG00000023171	GRAMD1B	0.287338	0.66597	1.23293	0.219973	0.739493	-4.84493
ENSG00000023191	RNH1	-0.564283	3.39265	-2.80066	0.00593173	0.374379	-2.29518
ENSG00000023228	NDUFS1	-0.165454	1.3794	-0.962015	0.337945	0.810471	-5.16349
ENSG00000023287	RB1CC1	0.387043	1.8889	2.49426	0.01396	0.410273	-2.95856
ENSG00000023318	ERP44	0.135457	0.787461	0.658481	0.51147	0.883594	-5.31358
ENSG00000023330	ALAS1	-0.418115	2.26469	-1.95308	0.0530995	0.558239	-3.97225
ENSG00000023445	BIRC3	0.59698	1.80466	2.8628	0.00494397	0.365253	-2.15487
ENSG00000023608	SNAPC1	0.3715	0.53607	1.55623	0.122244	0.662982	-4.46621
ENSG00000023697	DERA	0.136015	0.331447	0.715061	0.475938	0.870331	-5.22998
ENSG00000023734	STRAP	0.102532	1.79307	0.578153	0.564227	0.905038	-5.44331
ENSG00000023892	DEF6	-0.187957	1.56327	-0.993487	0.322439	0.802123	-5.14848
ENSG00000023902	PLEKHO1	0.33012	2.24251	1.80618	0.073355	0.589694	-4.20348
ENSG00000023909	GCLM	0.330416	1.79107	1.4525	0.148928	0.690232	-4.67762
ENSG00000024048	UBR2	-0.12236	1.45933	-0.760793	0.448249	0.86114	-5.31711
ENSG00000024862	CCDC28A	0.018326	0.324992	0.080973	0.935596	0.988919	-5.44101
ENSG00000025039	RRAGD	0.457912	1.77758	2.40048	0.0178845	0.441564	-3.14577
ENSG00000025293	PHF20	0.262195	2.90069	1.62663	0.106396	0.644137	-4.48179
ENSG00000025434	NR1H3	-0.0792481	2.48354	-0.28553	0.775723	0.959393	-5.5884
ENSG00000025708	TYMP	-0.101996	6.12178	-0.638957	0.524048	0.887906	-5.45365
ENSG00000025770	NCAPH2	0.0276341	1.25879	0.173709	0.862382	0.974509	-5.53327
ENSG00000025796	SEC63	-0.0221706	2.16342	-0.136183	0.891901	0.981507	-5.60275
ENSG00000025800	KPNA6	0.0273995	0.843177	0.159456	0.873574	0.976968	-5.49444
ENSG00000026025	VIM	-0.318521	7.63621	-1.86393	0.0647355	0.572343	-4.11616
ENSG00000026103	FAS	0.701761	1.82864	3.30023	0.00126695	0.317352	-1.08323
ENSG00000026297	RNASET2	-0.15901	3.83146	-0.868408	0.386876	0.836332	-5.31334
ENSG00000026508	CD44	0.055664	7.59672	0.333494	0.739334	0.951808	-5.56874
ENSG00000026652	AGPAT4	0.14798	1.02961	0.804228	0.422829	0.848342	-5.24615
ENSG00000026751	SLAMF7	1.17337	3.05081	3.16211	0.00197653	0.335208	-1.41894
ENSG00000026950	BTN3A1	0.448322	1.14567	2.13912	0.0344187	0.505177	-3.61935
ENSG00000027075	PRKCH	0.374343	4.27887	1.47965	0.141544	0.687238	-4.6873
ENSG00000027697	IFNGR1	0.165398	4.17496	0.829605	0.408382	0.842584	-5.34291
ENSG00000027847	B4GALT7	-0.571465	0.28594	-2.09549	0.0381956	0.520212	-3.67446
ENSG00000027869	SH2D2A	0.475087	-0.418498	1.95502	0.0528674	0.558239	-3.87402
ENSG00000028116	VRK2	-0.131896	1.08668	-0.771416	0.441952	0.858449	-5.27933
ENSG00000028137	TNFRSF1B	0.269696	5.64266	0.941451	0.348334	0.814103	-5.24876
ENSG00000028203	VEZT	0.0531512	1.45196	0.287371	0.774316	0.959393	-5.52625
ENSG00000028277	POU2F2	0.0364661	1.97965	0.150627	0.880519	0.978531	-5.58841
ENSG00000028310	BRD9	-0.00437171	1.77705	-0.0247252	0.980315	0.99761	-5.5884
ENSG00000028528	SNX1	0.0383658	3.52785	0.201016	0.841021	0.970304	-5.62609
ENSG00000028839	TBPL1	0.523034	0.852101	2.40508	0.0176713	0.438875	-3.12618
ENSG00000029153	ARNTL2	0.412417	0.352611	1.90373	0.0593013	0.568415	-3.97483
ENSG00000029363	BCLAF1	0.0713294	2.91816	0.549586	0.583608	0.911477	-5.50237
ENSG00000029364	SLC39A9	-0.263046	0.802958	-1.99487	0.0482859	0.545724	-3.85514
ENSG00000029725	RABEP1	0.0822051	1.6258	0.544932	0.586795	0.912434	-5.4488
ENSG00000029993	HMGB3	0.13191	2.07635	0.353561	0.724278	0.9493	-5.54781
ENSG00000030066	NUP160	0.238935	1.52873	1.26833	0.207094	0.728625	-4.87645
ENSG00000030110	BAK1	0.124429	0.303088	0.659208	0.511005	0.883486	-5.25789
ENSG00000030582	GRN	-0.345383	6.02878	-1.52663	0.129442	0.672896	-4.61683
ENSG00000031003	FAM13B	0.234781	1.95561	1.71951	0.0880579	0.608717	-4.32405
ENSG00000031081	ARHGAP31	0.125949	0.808652	0.526365	0.59959	0.916517	-5.38331
ENSG00000031698	SARS1	-0.170617	1.43857	-1.02933	0.305361	0.793334	-5.11038
ENSG00000031823	RANBP3	-0.18317	2.26824	-1.11984	0.264983	0.775156	-5.06967
ENSG00000032219	ARID4A	0.138807	1.64348	0.776411	0.439009	0.856161	-5.31577
ENSG00000032389	EIPR1	0.0591213	0.507242	0.288284	0.773618	0.959393	-5.42638
ENSG00000032444	PNPLA6	-0.484199	4.58896	-2.57595	0.011189	0.39258	-2.79603
ENSG00000032742	IFT88	-0.15507	0.106042	-0.738689	0.461515	0.864835	-5.19392
ENSG00000033030	ZCCHC8	0.0507754	0.355029	0.313783	0.754222	0.953895	-5.40169
ENSG00000033050	ABCF2	-0.124435	0.176253	-0.465362	0.642502	0.928466	-5.3429
ENSG00000033100	CHPF2	0.0664485	1.16685	0.404088	0.686855	0.939277	-5.4683
ENSG00000033170	FUT8	0.0560813	0.661228	0.190271	0.849413	0.972528	-5.46735
ENSG00000033178	UBA6	0.219233	1.923	1.05376	0.294075	0.78921	-5.11363
ENSG00000033327	GAB2	0.245445	3.64499	1.34914	0.179791	0.715313	-4.84736
ENSG00000033627	ATP6V0A1	-0.00100567	3.28504	-0.00523377	0.995833	0.999858	-5.64221
ENSG00000033800	PIAS1	0.231551	2.78156	1.41223	0.160427	0.701913	-4.76143
ENSG00000033867	SLC4A7	-0.177504	0.362711	-0.855269	0.394079	0.840018	-5.15007
ENSG00000034152	MAP2K3	0.265807	5.17076	1.38751	0.167816	0.708093	-4.79884
ENSG00000034239	EFCAB1	-0.379394	0.3827	-1.10225	0.272523	0.778126	-4.95704
ENSG00000034510	TMSB10	-0.00890227	6.78665	-0.0425531	0.966127	0.996017	-5.62549
ENSG00000034677	RNF19A	0.174847	2.85702	1.07775	0.283274	0.781534	-5.12509
ENSG00000034713	GABARAPL2	0.54316	3.90611	2.84382	0.00522851	0.373795	-2.195
ENSG00000035115	SH3YL1	-0.281174	0.699374	-1.42814	0.155807	0.699393	-4.64316
ENSG00000035403	VCL	-0.0758993	1.05502	-0.424505	0.671945	0.936697	-5.45266
ENSG00000035664	DAPK2	-0.247196	1.21966	-0.900313	0.369728	0.825465	-5.19918
ENSG00000035681	NSMAF	0.524185	3.8177	2.37983	0.01887	0.441564	-3.20322
ENSG00000035687	ADSS2	0.0124667	1.2114	0.0819284	0.934838	0.988883	-5.54094
ENSG00000035862	TIMP2	-0.38299	3.18969	-1.80213	0.0739946	0.591238	-4.22588
ENSG00000035928	RFC1	0.338801	1.67304	1.75343	0.0820402	0.598473	-4.26151
ENSG00000036054	TBC1D23	0.279657	1.03673	1.41966	0.158256	0.69972	-4.67242
ENSG00000036257	CUL3	0.0259123	3.03184	0.152667	0.878913	0.978112	-5.62838
ENSG00000036549	AC118549.1	-0.228545	0.266933	-0.935688	0.351282	0.815837	-5.07963
ENSG00000037241	RPL26L1	-0.225373	0.622948	-0.866744	0.387784	0.836768	-5.17102
ENSG00000037474	NSUN2	-0.0939993	1.2172	-0.58589	0.559032	0.903545	-5.3977
ENSG00000037637	FBXO42	-0.249134	0.337318	-1.6707	0.0973452	0.628427	-4.31216
ENSG00000037749	MFAP3	0.00987969	1.20442	0.055513	0.955821	0.99238	-5.53974
ENSG00000037897	METTL1	-0.0704887	0.0232801	-0.271856	0.786192	0.961317	-5.37586
ENSG00000038210	PI4K2B	0.569305	0.0735435	2.04673	0.0428332	0.535313	-3.74343
ENSG00000038219	BOD1L1	0.0577099	2.4983	0.31561	0.752838	0.953583	-5.57999
ENSG00000038274	MAT2B	0.141975	1.77038	0.869854	0.386089	0.836332	-5.25851
ENSG00000038358	EDC4	0.136588	1.50839	0.792246	0.429755	0.851211	-5.29642
ENSG00000038382	TRIO	-0.0662223	3.12725	-0.396389	0.69251	0.940552	-5.57062
ENSG00000038427	VCAN	-0.137869	4.16004	-0.448472	0.654608	0.931118	-5.55625
ENSG00000038532	CLEC16A	-0.066991	1.33588	-0.437948	0.662199	0.934107	-5.47128
ENSG00000038945	MSR1	-1.00075	3.7697	-3.01901	0.00308876	0.340196	-1.77476
ENSG00000039068	CDH1	-0.31449	1.39014	-1.00068	0.318963	0.800376	-5.13324
ENSG00000039123	MTREX	-0.0651654	1.08659	-0.399767	0.690027	0.939732	-5.46316
ENSG00000039319	ZFYVE16	0.38704	3.37946	1.48134	0.141094	0.687238	-4.68282
ENSG00000039523	RIPOR1	0.163264	2.92543	0.987656	0.325276	0.803921	-5.20786
ENSG00000039560	RAI14	-0.122108	0.357733	-0.45467	0.650154	0.929014	-5.3637
ENSG00000039650	PNKP	-0.0807816	2.97426	-0.378184	0.705951	0.945646	-5.57377
ENSG00000040341	STAU2	0.0590644	2.09711	0.307615	0.7589	0.955354	-5.56422
ENSG00000040487	SLC66A1	0.0311415	0.311453	0.174249	0.861959	0.974509	-5.42695
ENSG00000040531	CTNS	0.285607	1.41921	1.62206	0.107373	0.644654	-4.43761
ENSG00000040633	PHF23	0.110561	2.31073	0.681257	0.497	0.876601	-5.41189
ENSG00000040933	INPP4A	-0.0570853	2.02852	-0.330589	0.741522	0.952211	-5.55545
ENSG00000041357	PSMA4	0.217128	2.70752	0.961652	0.338126	0.810471	-5.22288
ENSG00000041802	LSG1	-0.0941023	0.508928	-0.521234	0.603149	0.917375	-5.35449
ENSG00000042062	RIPOR3	0.148815	0.244532	0.684075	0.495225	0.875538	-5.23369
ENSG00000042088	TDP1	0.104526	0.382706	0.503639	0.615423	0.919117	-5.34255
ENSG00000042429	MED17	0.0800033	1.41927	0.66086	0.509948	0.882548	-5.37114
ENSG00000042445	RETSAT	-0.252644	0.889686	-1.78764	0.0763172	0.597786	-4.17985
ENSG00000042493	CAPG	-0.347766	4.67516	-1.77786	0.0779178	0.598473	-4.26634
ENSG00000042753	AP2S1	-0.508886	2.8331	-2.23824	0.027019	0.479005	-3.47411
ENSG00000042832	TG	-0.000325628	1.46324	-0.00122289	0.999026	0.999858	-5.56368
ENSG00000042980	ADAM28	0.227815	0.488694	0.949643	0.344171	0.8128	-5.08196
ENSG00000043093	DCUN1D1	0.0833951	1.2179	0.473862	0.636445	0.926004	-5.44675
ENSG00000043143	JADE2	-0.127064	0.794668	-0.628498	0.530852	0.891226	-5.33347
ENSG00000043462	LCP2	0.21742	6.76576	1.06533	0.288831	0.784298	-5.1303
ENSG00000044115	CTNNA1	-0.0740611	4.43979	-0.49664	0.620336	0.920081	-5.53704
ENSG00000044446	PHKA2	-0.295988	1.28516	-1.45984	0.146904	0.687238	-4.64531
ENSG00000044574	HSPA5	-0.0784799	4.24945	-0.405823	0.685584	0.939041	-5.57313
ENSG00000046651	OFD1	-0.0476961	0.520338	-0.253517	0.800295	0.964132	-5.44117
ENSG00000047056	WDR37	0.0554916	1.4767	0.364754	0.715926	0.946738	-5.50709
ENSG00000047188	YTHDC2	0.109932	0.508433	0.614275	0.540177	0.896864	-5.30796
ENSG00000047249	ATP6V1H	0.203859	2.65246	1.11543	0.26686	0.776292	-5.08346
ENSG00000047315	POLR2B	0.0166849	1.38146	0.0962553	0.923476	0.988226	-5.55326
ENSG00000047346	FAM214A	0.164097	1.20579	0.993338	0.322511	0.802123	-5.11799
ENSG00000047365	ARAP2	0.411855	1.84349	2.13866	0.0344567	0.505177	-3.63986
ENSG00000047410	TPR	0.0679574	2.25742	0.456878	0.648571	0.928826	-5.52332
ENSG00000047457	CP	-0.371436	0.908319	-1.21489	0.226755	0.746982	-4.89618
ENSG00000047578	KIAA0556	-0.242937	1.8891	-1.41917	0.158399	0.69972	-4.72668
ENSG00000047579	DTNBP1	0.290475	1.33127	1.57975	0.116754	0.659017	-4.48928
ENSG00000047621	C12orf4	-0.110552	0.910809	-0.509702	0.611181	0.917752	-5.40129
ENSG00000047644	WWC3	-0.131653	0.798662	-0.850346	0.396798	0.840398	-5.19771
ENSG00000047849	MAP4	-0.104224	1.94944	-0.636776	0.525464	0.888469	-5.421
ENSG00000048052	HDAC9	-0.0579566	0.542167	-0.210894	0.833322	0.970211	-5.4543
ENSG00000048342	CC2D2A	0.161061	3.33576	0.671073	0.503443	0.878479	-5.44367
ENSG00000048392	RRM2B	-0.488487	1.37738	-2.7164	0.00755889	0.374379	-2.48593
ENSG00000048405	ZNF800	-0.149999	1.04057	-0.908499	0.365406	0.82369	-5.17939
ENSG00000048471	SNX29	-0.251576	1.34208	-1.34652	0.180631	0.715313	-4.78239
ENSG00000048649	RSF1	-0.0929655	2.18128	-0.632529	0.528225	0.889739	-5.43544
ENSG00000048707	VPS13D	0.33492	2.2714	1.84105	0.0680439	0.579828	-4.14992
ENSG00000048740	CELF2	-0.119074	2.67036	-0.704905	0.482213	0.872054	-5.41027
ENSG00000048828	FAM120A	-0.0808968	2.75689	-0.470782	0.638637	0.926588	-5.53432
ENSG00000048991	R3HDM1	-0.189613	1.79606	-0.724799	0.469963	0.868396	-5.36146
ENSG00000049089	COL9A2	-0.34723	0.514349	-1.23964	0.21749	0.737066	-4.83734
ENSG00000049239	H6PD	-0.31925	0.718246	-2.1632	0.0324762	0.501877	-3.56937
ENSG00000049245	VAMP3	-0.00303142	3.40942	-0.0141617	0.988724	0.999076	-5.64324
ENSG00000049540	ELN	-0.199332	1.44475	-0.627782	0.53132	0.891481	-5.38873
ENSG00000049541	RFC2	-0.22918	0.633567	-1.32996	0.186011	0.717987	-4.74862
ENSG00000049618	ARID1B	-0.102741	2.31281	-0.704579	0.482415	0.872054	-5.40051
ENSG00000049656	CLPTM1L	-0.0479826	3.40102	-0.300249	0.764498	0.958008	-5.60368
ENSG00000049759	NEDD4L	-0.0311667	1.98015	-0.118916	0.905538	0.983571	-5.59481
ENSG00000049860	HEXB	-0.376098	3.72437	-1.7249	0.0870775	0.607548	-4.34633
ENSG00000050130	JKAMP	-0.0223023	0.95281	-0.128172	0.898224	0.98263	-5.50989
ENSG00000050327	ARHGEF5	-0.460281	0.535342	-1.67899	0.0957145	0.62723	-4.31768
ENSG00000050344	NFE2L3	0.188884	1.69547	0.808924	0.420134	0.846452	-5.2967
ENSG00000050405	LIMA1	-0.262921	0.575788	-1.17824	0.240994	0.761793	-4.90304
ENSG00000050426	LETMD1	-0.0411583	1.01752	-0.240959	0.809991	0.965803	-5.49817
ENSG00000050438	SLC4A8	-0.470476	0.646781	-1.9002	0.0597667	0.568437	-3.99832
ENSG00000050730	TNIP3	0.683355	2.90332	1.77346	0.0786483	0.598473	-4.26538
ENSG00000050748	MAPK9	-0.21059	0.985391	-1.06565	0.288686	0.784298	-5.04211
ENSG00000050820	BCAR1	-0.945377	1.10879	-2.82285	0.00556011	0.374379	-2.25231
ENSG00000051009	FAM160A2	0.0490388	1.91761	0.240964	0.809987	0.965803	-5.57133
ENSG00000051108	HERPUD1	0.384996	3.37382	2.05882	0.0416398	0.531768	-3.80486
ENSG00000051128	HOMER3	0.0944384	1.61705	0.501678	0.616798	0.919117	-5.46681
ENSG00000051382	PIK3CB	-0.0307273	1.68152	-0.185849	0.852872	0.973185	-5.5679
ENSG00000051523	CYBA	-0.208919	6.5762	-1.45741	0.147574	0.688011	-4.70223
ENSG00000051596	THOC3	-0.0794516	0.784552	-0.281534	0.778778	0.959907	-5.46496
ENSG00000051620	HEBP2	0.0404828	1.62973	0.207814	0.835721	0.970211	-5.55801
ENSG00000051825	MPHOSPH9	-0.245846	0.433448	-1.00107	0.318776	0.800376	-5.04524
ENSG00000052126	PLEKHA5	-0.0396897	0.517811	-0.155091	0.877006	0.977607	-5.45439
ENSG00000052344	PRSS8	0.0628639	0.467998	0.239432	0.811172	0.966585	-5.43854
ENSG00000052723	SIKE1	0.299499	0.287191	1.3797	0.170203	0.710549	-4.65753
ENSG00000052749	RRP12	-0.00466718	2.41802	-0.0276335	0.978	0.997055	-5.62034
ENSG00000052795	FNIP2	0.398461	2.83906	1.84318	0.06773	0.578663	-4.15771
ENSG00000052802	MSMO1	-0.400059	0.345826	-1.83943	0.0682833	0.580467	-4.07641
ENSG00000052841	TTC17	0.0472575	1.49919	0.285359	0.775853	0.959393	-5.53226
ENSG00000053254	FOXN3	0.156303	3.32129	1.01439	0.312406	0.797011	-5.19049
ENSG00000053371	AKR7A2	-0.208129	0.412975	-0.921119	0.358806	0.820074	-5.10858
ENSG00000053501	USE1	-0.440558	0.995502	-2.52613	0.0128133	0.405602	-2.88837
ENSG00000053524	MCF2L2	0.335015	1.04066	1.40231	0.163361	0.702855	-4.68752
ENSG00000053770	AP5M1	-0.0867356	0.802026	-0.477204	0.634071	0.925564	-5.4054
ENSG00000053900	ANAPC4	-0.227903	0.596597	-1.1666	0.245647	0.764752	-4.91621
ENSG00000053918	KCNQ1	-0.41097	0.913659	-1.94147	0.0545075	0.560041	-3.9458
ENSG00000054116	TRAPPC3	0.000142881	1.62268	0.000796064	0.999366	0.999858	-5.57776
ENSG00000054118	THRAP3	0.0550498	2.66903	0.405212	0.686031	0.939085	-5.55731
ENSG00000054148	PHPT1	-0.318207	1.13484	-1.05203	0.294864	0.78921	-5.06948
ENSG00000054267	ARID4B	0.298533	2.98308	1.60778	0.110469	0.648067	-4.50894
ENSG00000054277	OPN3	-0.51131	1.12442	-2.03572	0.0439442	0.541112	-3.80102
ENSG00000054282	SDCCAG8	0.226909	2.14495	1.31618	0.190581	0.721103	-4.85466
ENSG00000054523	KIF1B	0.0366361	2.33802	0.264332	0.79197	0.962008	-5.58723
ENSG00000054611	TBC1D22A	0.135809	1.66594	0.991302	0.3235	0.802959	-5.15489
ENSG00000054654	SYNE2	-0.172117	2.87444	-0.889663	0.375398	0.829283	-5.28715
ENSG00000054965	FAM168A	-0.120503	1.55435	-0.71276	0.477355	0.870331	-5.35374
ENSG00000054967	RELT	-0.133616	3.30731	-0.602572	0.547912	0.899841	-5.48292
ENSG00000054983	GALC	0.438584	3.12444	2.41688	0.0171347	0.436327	-3.12669
ENSG00000055044	NOP58	0.181262	1.38752	1.09478	0.275771	0.780464	-5.04256
ENSG00000055070	SZRD1	-0.0524254	2.67202	-0.330851	0.741324	0.952211	-5.58206
ENSG00000055130	CUL1	0.262901	1.09414	1.3164	0.190509	0.721103	-4.7943
ENSG00000055147	FAM114A2	0.137795	0.660734	0.717664	0.474337	0.870331	-5.26453
ENSG00000055163	CYFIP2	-0.0947985	3.58468	-0.400334	0.68961	0.939732	-5.57492
ENSG00000055208	TAB2	0.446685	3.11226	2.46781	0.0149807	0.416368	-3.02256
ENSG00000055211	GINM1	-0.0606465	0.375853	-0.314242	0.753874	0.953825	-5.40964
ENSG00000055332	EIF2AK2	0.689378	2.02838	3.15083	0.00204839	0.335208	-1.45905
ENSG00000055483	AC022966.1	0.0826566	2.58855	0.528237	0.598295	0.916243	-5.50495
ENSG00000055609	KMT2C	0.0148554	3.01919	0.110215	0.91242	0.98561	-5.63296
ENSG00000055917	PUM2	0.141994	2.23838	0.876345	0.382565	0.834267	-5.2774
ENSG00000055950	MRPL43	-0.207706	0.560627	-0.944608	0.346726	0.813646	-5.10512
ENSG00000055955	ITIH4	-0.000524558	0.436669	-0.00191347	0.998476	0.999858	-5.45053
ENSG00000056097	ZFR	0.0628827	1.81264	0.457694	0.647986	0.928826	-5.49827
ENSG00000056558	TRAF1	0.808105	1.98352	2.30204	0.0230285	0.468086	-3.33884
ENSG00000056586	RC3H2	-0.248566	1.95218	-1.13972	0.256635	0.769749	-5.03698
ENSG00000056972	TRAF3IP2	0.064254	1.54622	0.328665	0.742973	0.952393	-5.52398
ENSG00000057019	DCBLD2	-0.248815	0.283353	-0.818392	0.414729	0.843943	-5.16375
ENSG00000057149	SERPINB3	-0.625614	0.93885	-1.40097	0.163762	0.703438	-4.6978
ENSG00000057252	SOAT1	-0.0860658	2.33851	-0.347803	0.728587	0.950275	-5.56312
ENSG00000057608	GDI2	-0.126658	3.3232	-0.763243	0.446792	0.86085	-5.38527
ENSG00000057657	PRDM1	0.514558	1.7564	2.54853	0.0120586	0.405602	-2.84489
ENSG00000057663	ATG5	0.0430477	0.638849	0.240935	0.81001	0.965803	-5.45551
ENSG00000057704	TMCC3	0.216117	2.29371	0.921698	0.358505	0.820074	-5.24365
ENSG00000057757	PITHD1	-0.0768939	0.655648	-0.443145	0.658446	0.932766	-5.40191
ENSG00000058063	ATP11B	0.278417	3.67968	1.67527	0.0964428	0.628427	-4.41991
ENSG00000058091	CDK14	0.00509372	1.55045	0.0266575	0.978776	0.997084	-5.56934
ENSG00000058262	SEC61A1	-0.0252801	2.44168	-0.132134	0.895096	0.98203	-5.61371
ENSG00000058272	PPP1R12A	0.143705	3.89286	0.987096	0.325549	0.804174	-5.21718
ENSG00000058453	CROCC	-0.50026	2.05588	-1.95669	0.0526682	0.558239	-3.96132
ENSG00000058600	POLR3E	-0.20243	0.92492	-0.952195	0.342881	0.8128	-5.13421
ENSG00000058668	ATP2B4	-0.0599571	1.84415	-0.333782	0.739117	0.951808	-5.5449
ENSG00000058673	ZC3H11A	0.26036	2.41309	1.53873	0.126461	0.66857	-4.59119
ENSG00000058799	YIPF1	0.260712	1.17314	1.67297	0.0968952	0.628427	-4.35331
ENSG00000059122	FLYWCH1	-0.361294	1.01561	-1.60247	0.111638	0.652067	-4.4459
ENSG00000059145	UNKL	0.0168148	1.63642	0.0803793	0.936067	0.988919	-5.57436
ENSG00000059377	TBXAS1	-0.0339466	4.0685	-0.190764	0.849028	0.972528	-5.63028
ENSG00000059378	PARP12	0.31207	2.44564	1.21815	0.225518	0.745572	-4.97025
ENSG00000059728	MXD1	0.207078	6.12062	0.772676	0.441209	0.858013	-5.37141
ENSG00000059758	CDK17	0.185218	2.07254	1.00325	0.317725	0.799716	-5.16571
ENSG00000059804	SLC2A3	-0.0483427	6.21033	-0.203593	0.839011	0.970304	-5.61435
ENSG00000059915	PSD	0.387004	0.835992	1.55861	0.12168	0.662489	-4.48246
ENSG00000060069	CTDP1	0.311208	2.44453	1.81408	0.0721233	0.588543	-4.19632
ENSG00000060138	YBX3	-0.218371	4.0123	-1.29704	0.197065	0.724641	-4.90718
ENSG00000060237	WNK1	-0.199601	4.02662	-1.67872	0.0957667	0.62723	-4.41526
ENSG00000060339	CCAR1	0.0120075	1.91881	0.0776491	0.938234	0.989754	-5.59388
ENSG00000060491	OGFR	0.220068	2.8995	1.05391	0.294005	0.78921	-5.14813
ENSG00000060558	GNA15	-0.0106689	2.64507	-0.0585446	0.953411	0.992239	-5.62756
ENSG00000060642	PIGV	0.0632229	-0.163217	0.329681	0.742207	0.952211	-5.33163
ENSG00000060656	PTPRU	-0.091878	0.28121	-0.28273	0.777863	0.959907	-5.40591
ENSG00000060688	SNRNP40	-0.283211	0.513557	-1.48365	0.14048	0.687238	-4.56399
ENSG00000060762	MPC1	0.0424828	0.737881	0.178715	0.858458	0.974238	-5.4807
ENSG00000060971	ACAA1	0.127631	3.36189	0.790554	0.430738	0.851829	-5.36832
ENSG00000060982	BCAT1	-0.0235505	2.30551	-0.129257	0.897367	0.98263	-5.60827
ENSG00000061273	HDAC7	-0.187594	2.79989	-1.12934	0.26097	0.772222	-5.07467
ENSG00000061936	SFSWAP	-0.151698	1.72927	-1.03239	0.303933	0.793334	-5.12488
ENSG00000061938	TNK2	-0.252562	2.17552	-1.28569	0.200986	0.725138	-4.89256
ENSG00000061987	MON2	0.129741	1.6813	0.784032	0.434541	0.853709	-5.31409
ENSG00000062038	CDH3	-0.206094	-0.0718081	-0.798057	0.426388	0.850679	-5.13631
ENSG00000062194	GPBP1	0.518408	2.92253	2.75854	0.00670038	0.374379	-2.39137
ENSG00000062282	DGAT2	-0.0948834	3.70407	-0.325551	0.745322	0.953176	-5.5992
ENSG00000062485	CS	-0.279426	2.70691	-1.8852	0.0617816	0.569989	-4.09056
ENSG00000062582	MRPS24	-0.0695895	1.45619	-0.311449	0.755991	0.954344	-5.52385
ENSG00000062598	ELMO2	-0.0561634	2.1099	-0.364181	0.716353	0.946738	-5.54829
ENSG00000062650	WAPL	-0.11133	1.42328	-0.619203	0.536937	0.89435	-5.39822
ENSG00000062716	VMP1	0.123868	5.45569	0.679489	0.498115	0.877651	-5.43656
ENSG00000062725	APPBP2	-0.220342	0.878253	-1.45963	0.146962	0.687238	-4.61845
ENSG00000062822	POLD1	-0.577119	0.325402	-2.71022	0.00769287	0.374379	-2.52071
ENSG00000063015	SEZ6	0.324454	-0.0133904	1.34741	0.180345	0.715313	-4.66312
ENSG00000063046	EIF4B	-0.233699	3.43115	-1.71959	0.0880422	0.608717	-4.35392
ENSG00000063169	BICRA	-0.255627	0.412666	-1.4065	0.162117	0.702855	-4.64393
ENSG00000063177	RPL18	-0.133529	4.65232	-0.63063	0.529462	0.890402	-5.46953
ENSG00000063241	ISOC2	-0.453949	0.901658	-1.82246	0.0708348	0.586365	-4.12939
ENSG00000063244	U2AF2	-0.295783	3.20329	-1.73747	0.0848281	0.603104	-4.32509
ENSG00000063245	EPN1	-0.204965	2.47379	-1.30243	0.195224	0.723287	-4.88312
ENSG00000063322	MED29	-0.000910907	1.6723	-0.00570882	0.995454	0.999858	-5.58027
ENSG00000063601	MTMR1	0.0291766	0.853589	0.18108	0.856605	0.973868	-5.48995
ENSG00000063854	HAGH	-0.110291	1.58544	-0.56781	0.571207	0.907498	-5.43725
ENSG00000063978	RNF4	0.0224363	2.19146	0.144938	0.884999	0.97937	-5.6013
ENSG00000064012	CASP8	0.0509836	2.5273	0.316855	0.751895	0.953583	-5.57977
ENSG00000064115	TM7SF3	0.0540254	1.76175	0.258362	0.796563	0.963355	-5.55696
ENSG00000064225	ST3GAL6	-0.0466918	2.27336	-0.237295	0.812826	0.966593	-5.59024
ENSG00000064270	ATP2C2	0.0286652	1.58397	0.0930113	0.926047	0.988617	-5.56973
ENSG00000064313	TAF2	-0.0417697	1.2818	-0.254325	0.799673	0.963837	-5.52261
ENSG00000064393	HIPK2	-0.39482	1.85685	-1.96512	0.0516726	0.55581	-3.94075
ENSG00000064419	TNPO3	-0.0420216	0.944435	-0.237126	0.812957	0.966632	-5.4926
ENSG00000064490	RFXANK	-0.28075	1.36613	-1.31604	0.190628	0.721103	-4.81999
ENSG00000064547	LPAR2	-0.39706	3.06681	-1.4376	0.153108	0.69784	-4.73462
ENSG00000064601	CTSA	-0.377418	4.17099	-2.08615	0.0390485	0.522208	-3.75805
ENSG00000064607	SUGP2	-0.472295	1.00943	-2.75475	0.00677369	0.374379	-2.40574
ENSG00000064666	CNN2	-0.144764	5.22372	-0.92348	0.35758	0.820074	-5.26613
ENSG00000064687	ABCA7	-0.36242	2.57684	-1.98226	0.0496979	0.55093	-3.92911
ENSG00000064726	BTBD1	-0.185366	2.22393	-0.712514	0.477507	0.870331	-5.39139
ENSG00000064763	FAR2	-0.20302	1.99734	-1.25961	0.210216	0.7302	-4.91338
ENSG00000064886	CHI3L2	0.391815	0.0645629	1.61043	0.10989	0.647708	-4.36443
ENSG00000064932	SBNO2	0.0108183	5.08767	0.0588888	0.953137	0.992239	-5.64118
ENSG00000064961	HMG20B	-0.407951	1.47946	-2.31447	0.0223142	0.465383	-3.31063
ENSG00000064995	TAF11	0.0519068	0.314839	0.348987	0.7277	0.950064	-5.39056
ENSG00000064999	ANKS1A	-0.0915121	1.11836	-0.59274	0.554452	0.902645	-5.38541
ENSG00000065000	AP3D1	-0.0345357	3.02698	-0.266982	0.789934	0.962008	-5.60716
ENSG00000065029	ZNF76	-0.0224107	0.737823	-0.154847	0.877198	0.977629	-5.48168
ENSG00000065054	SLC9A3R2	-0.540831	0.860907	-1.90613	0.0589864	0.56835	-4.0009
ENSG00000065135	GNAI3	0.114607	1.33132	0.659736	0.510667	0.883473	-5.36503
ENSG00000065150	IPO5	0.00203988	1.27024	0.0121116	0.990356	0.99917	-5.54787
ENSG00000065154	OAT	-0.0388708	1.62618	-0.220027	0.826218	0.969113	-5.55628
ENSG00000065243	PKN2	-0.00347782	1.54096	-0.0223177	0.982231	0.997834	-5.57067
ENSG00000065268	WDR18	-0.417042	0.514284	-1.58239	0.116151	0.657286	-4.44166
ENSG00000065357	DGKA	-0.0977669	3.30389	-0.415101	0.678797	0.938133	-5.5656
ENSG00000065361	ERBB3	0.0897845	1.94078	0.259139	0.795965	0.963299	-5.56601
ENSG00000065413	ANKRD44	-0.00638256	3.07478	-0.0303548	0.975834	0.996588	-5.63847
ENSG00000065427	KARS1	0.0225377	1.86015	0.11835	0.905985	0.983571	-5.58598
ENSG00000065457	ADAT1	0.34355	2.21365	1.64935	0.101648	0.637746	-4.43297
ENSG00000065518	NDUFB4	-0.201548	2.20409	-0.906027	0.366707	0.825044	-5.25448
ENSG00000065526	SPEN	-0.0768005	1.77386	-0.519688	0.604223	0.917375	-5.47114
ENSG00000065548	ZC3H15	0.02266	1.80418	0.137284	0.891033	0.981464	-5.58177
ENSG00000065559	MAP2K4	-0.00912937	1.4281	-0.0469374	0.96264	0.994944	-5.56262
ENSG00000065600	PACC1	0.273653	0.0231748	1.23958	0.217511	0.737066	-4.78131
ENSG00000065613	SLK	0.252755	2.10058	1.39203	0.166446	0.708079	-4.76551
ENSG00000065615	CYB5R4	0.37674	2.88474	2.01608	0.0459881	0.544817	-3.87408
ENSG00000065621	GSTO2	-0.0478049	0.812825	-0.204459	0.838335	0.970304	-5.48162
ENSG00000065665	SEC61A2	-0.234081	0.113154	-0.994589	0.321905	0.801723	-5.01562
ENSG00000065717	TLE2	-0.260216	0.144028	-0.845988	0.399216	0.840982	-5.13087
ENSG00000065802	ASB1	-0.211775	0.466622	-1.08895	0.278323	0.781534	-4.97324
ENSG00000065809	FAM107B	0.286158	4.40519	1.81572	0.0718692	0.588543	-4.20923
ENSG00000065882	TBC1D1	0.0423522	3.09742	0.304826	0.761018	0.955788	-5.5984
ENSG00000065883	CDK13	-0.0737625	2.15642	-0.544699	0.586955	0.912434	-5.48076
ENSG00000065911	MTHFD2	0.0772955	2.47382	0.371823	0.71067	0.946386	-5.56181
ENSG00000065923	SLC9A7	-0.219035	-0.0863031	-0.924191	0.357212	0.820074	-5.05129
ENSG00000065970	FOXJ2	-0.0273959	0.361022	-0.187731	0.851399	0.972776	-5.43075
ENSG00000065978	YBX1	-0.59568	4.88184	-2.66743	0.0086812	0.382982	-2.59637
ENSG00000065989	PDE4A	0.00241869	1.54541	0.0148783	0.988154	0.999012	-5.57119
ENSG00000066027	PPP2R5A	0.196704	1.54811	1.1551	0.250307	0.766313	-4.99583
ENSG00000066044	ELAVL1	0.0317789	1.10547	0.174913	0.861438	0.974509	-5.51827
ENSG00000066084	DIP2B	0.181852	1.92005	1.03918	0.300776	0.792728	-5.12549
ENSG00000066117	SMARCD1	0.0449894	1.1703	0.272859	0.785423	0.961317	-5.50611
ENSG00000066135	KDM4A	0.0648463	0.385522	0.3869	0.699504	0.943923	-5.38436
ENSG00000066136	NFYC	-0.0921369	2.55659	-0.707269	0.480748	0.871384	-5.40593
ENSG00000066294	CD84	0.397678	0.974072	1.62197	0.107391	0.644654	-4.41063
ENSG00000066322	ELOVL1	-0.201287	2.10122	-1.14804	0.253199	0.767001	-5.03406
ENSG00000066336	SPI1	-0.171188	6.23688	-1.11722	0.266096	0.775156	-5.08503
ENSG00000066379	ZNRD1	0.324672	0.177449	1.39662	0.165063	0.705197	-4.63013
ENSG00000066422	ZBTB11	-0.165799	0.325949	-1.11792	0.265797	0.775156	-4.93271
ENSG00000066427	ATXN3	-0.117275	1.73954	-0.570754	0.569216	0.906758	-5.44424
ENSG00000066455	GOLGA5	0.241545	0.420022	1.13386	0.259076	0.77172	-4.92337
ENSG00000066629	EML1	-0.537128	0.524324	-1.92188	0.0569536	0.564217	-3.96093
ENSG00000066654	THUMPD1	-0.271873	0.723243	-1.50064	0.136033	0.680786	-4.55719
ENSG00000066739	ATG2B	-0.177648	0.186957	-0.910629	0.364287	0.822357	-5.08807
ENSG00000066777	ARFGEF1	-0.0956557	2.01485	-0.646936	0.518889	0.886439	-5.42117
ENSG00000066827	ZFAT	0.268378	0.44606	1.26499	0.208285	0.729962	-4.79449
ENSG00000066855	MTFR1	0.435119	1.28201	2.00558	0.0471135	0.544817	-3.85148
ENSG00000066923	STAG3	-0.0388599	1.58457	-0.214758	0.830315	0.970042	-5.55512
ENSG00000066933	MYO9A	0.0157945	0.9518	0.0734178	0.941594	0.990286	-5.51182
ENSG00000067048	DDX3Y	0.202587	0.808828	0.820822	0.413349	0.843943	-5.17975
ENSG00000067057	PFKP	0.0558892	2.13678	0.264091	0.792156	0.962008	-5.57721
ENSG00000067064	IDI1	0.188156	2.26029	0.953037	0.342456	0.8128	-5.21623
ENSG00000067066	SP100	0.21519	4.46838	1.34959	0.179647	0.715313	-4.84685
ENSG00000067082	KLF6	0.199751	5.55067	1.27436	0.204958	0.728477	-4.92727
ENSG00000067167	TRAM1	0.113677	2.43428	0.567591	0.571356	0.907498	-5.4792
ENSG00000067182	TNFRSF1A	-0.24732	5.09827	-1.37339	0.17215	0.711894	-4.81545
ENSG00000067208	EVI5	-0.104947	1.68483	-0.534207	0.59417	0.91448	-5.45916
ENSG00000067225	PKM	-0.199907	5.84781	-1.20754	0.229561	0.747657	-4.99655
ENSG00000067334	DNTTIP2	0.172078	2.68971	0.842794	0.400993	0.840982	-5.3186
ENSG00000067365	METTL22	-0.393994	2.41514	-2.18443	0.0308426	0.492082	-3.56979
ENSG00000067369	TP53BP1	0.162507	1.71878	1.0463	0.297492	0.79092	-5.10928
ENSG00000067560	RHOA	0.116622	6.01039	0.712619	0.477442	0.870331	-5.41139
ENSG00000067596	DHX8	0.103686	1.80638	0.588448	0.557319	0.903545	-5.43746
ENSG00000067606	PRKCZ	-0.191004	0.944967	-0.679014	0.498415	0.87771	-5.32245
ENSG00000067704	IARS2	-0.367948	0.426944	-1.82424	0.0705638	0.585692	-4.10356
ENSG00000067798	NAV3	-0.192807	0.266622	-0.500915	0.617334	0.919117	-5.32979
ENSG00000067829	IDH3G	-0.151453	1.64942	-0.758052	0.449882	0.861943	-5.33063
ENSG00000067836	ROGDI	-0.717019	0.826844	-3.40407	0.000898927	0.308698	-0.857581
ENSG00000067900	ROCK1	0.168701	2.99743	1.21004	0.228605	0.747529	-4.99537
ENSG00000067955	CBFB	-0.243351	2.49272	-1.37479	0.171716	0.711894	-4.80036
ENSG00000068024	HDAC4	-0.00334405	3.54951	-0.0192991	0.984634	0.997935	-5.64419
ENSG00000068028	RASSF1	0.0109984	0.181613	0.0595037	0.952648	0.992239	-5.42045
ENSG00000068079	IFI35	0.0517076	2.14182	0.206893	0.836439	0.970211	-5.58675
ENSG00000068097	HEATR6	0.0575637	0.997514	0.318159	0.750908	0.953583	-5.47534
ENSG00000068120	COASY	-0.168891	1.35858	-1.02483	0.307472	0.793473	-5.10854
ENSG00000068305	MEF2A	0.161025	2.38065	0.971723	0.333111	0.808899	-5.20522
ENSG00000068308	OTUD5	0.22737	2.20761	1.36788	0.173864	0.711894	-4.7983
ENSG00000068323	TFE3	0.166012	3.35224	0.912558	0.363275	0.822357	-5.27674
ENSG00000068366	ACSL4	0.260068	3.13853	1.43763	0.153099	0.69784	-4.73564
ENSG00000068383	INPP5A	0.746112	1.78804	2.97532	0.00352947	0.340196	-1.89284
ENSG00000068400	GRIPAP1	0.00161798	3.10464	0.0110933	0.991167	0.999186	-5.63962
ENSG00000068438	FTSJ1	0.120202	0.448164	0.580032	0.562963	0.904854	-5.31361
ENSG00000068650	ATP11A	0.0791039	3.61066	0.473726	0.636542	0.926004	-5.54636
ENSG00000068654	POLR1A	-0.192182	0.392947	-0.806385	0.42159	0.847485	-5.18507
ENSG00000068697	LAPTM4A	-0.282565	3.08004	-1.33759	0.183519	0.715313	-4.85516
ENSG00000068724	TTC7A	-0.32803	1.74393	-1.76768	0.0796146	0.598473	-4.24828
ENSG00000068745	IP6K2	0.20879	2.28451	1.47795	0.141999	0.687238	-4.66596
ENSG00000068784	SRBD1	0.262189	0.602878	1.25616	0.211456	0.731662	-4.8171
ENSG00000068796	KIF2A	0.327801	0.984692	1.73004	0.0861526	0.605776	-4.26225
ENSG00000068831	RASGRP2	-0.384053	2.49398	-1.77119	0.0790259	0.598473	-4.2653
ENSG00000068878	PSME4	-0.000567448	1.70929	-0.00306837	0.997557	0.999858	-5.58308
ENSG00000068885	IFT80	0.20007	0.989125	0.886548	0.377067	0.830582	-5.18218
ENSG00000068903	SIRT2	-0.14207	2.19386	-0.955627	0.341151	0.811769	-5.21436
ENSG00000068912	ERLEC1	0.280021	0.802642	1.47813	0.141949	0.687238	-4.58508
ENSG00000068971	PPP2R5B	0.0421489	0.713171	0.214246	0.830713	0.970042	-5.46969
ENSG00000068976	PYGM	-0.381675	0.160833	-1.41798	0.158746	0.69972	-4.6111
ENSG00000069011	PITX1	-0.480284	0.263592	-1.65861	0.0997628	0.63346	-4.32741
ENSG00000069020	MAST4	-0.341534	0.787009	-1.22388	0.223354	0.744558	-4.8757
ENSG00000069248	NUP133	0.0708924	1.00038	0.368757	0.712948	0.946386	-5.46151
ENSG00000069275	NUCKS1	-0.311488	0.937711	-1.26083	0.209777	0.7302	-4.85036
ENSG00000069329	VPS35	-0.283712	2.47221	-2.15264	0.0333155	0.503775	-3.6291
ENSG00000069345	DNAJA2	-0.222028	2.07374	-1.92123	0.0570357	0.564281	-4.01964
ENSG00000069399	BCL3	0.213355	5.39383	1.10387	0.271824	0.778125	-5.10521
ENSG00000069424	KCNAB2	-0.072184	3.7789	-0.369178	0.712635	0.946386	-5.58648
ENSG00000069493	CLEC2D	0.379017	1.00702	1.80714	0.0732054	0.589694	-4.14996
ENSG00000069667	RORA	0.116068	0.64094	0.470739	0.638667	0.926588	-5.38452
ENSG00000069849	ATP1B3	0.0612764	3.35412	0.31245	0.755232	0.954297	-5.5989
ENSG00000069869	NEDD4	-0.0155304	4.08748	-0.0362874	0.971112	0.996546	-5.64554
ENSG00000069943	PIGB	0.0740517	1.73297	0.342625	0.73247	0.951004	-5.53271
ENSG00000069956	MAPK6	0.534143	2.70492	3.20562	0.00172061	0.335208	-1.30749
ENSG00000069974	RAB27A	0.0798105	3.01265	0.38461	0.701196	0.94425	-5.57306
ENSG00000070010	UFD1	0.0729927	1.98941	0.456423	0.648897	0.928826	-5.50983
ENSG00000070047	PHRF1	-0.139718	0.90775	-0.889301	0.375592	0.829283	-5.18047
ENSG00000070081	NUCB2	-0.0550423	2.66143	-0.252071	0.801411	0.964816	-5.60184
ENSG00000070087	PFN2	-0.233271	0.998559	-0.952794	0.342578	0.8128	-5.14235
ENSG00000070190	DAPP1	0.589841	1.67832	2.86754	0.00487524	0.365253	-2.14553
ENSG00000070214	SLC44A1	-0.00887215	0.409406	-0.0471008	0.96251	0.994944	-5.45379
ENSG00000070269	TMEM260	0.039039	1.36635	0.215231	0.829947	0.969851	-5.53408
ENSG00000070366	SMG6	0.175125	1.48474	0.904729	0.367392	0.825465	-5.21092
ENSG00000070367	EXOC5	-0.025273	1.67703	-0.152181	0.879295	0.978112	-5.57121
ENSG00000070413	DGCR2	-0.140893	1.38708	-0.78871	0.431811	0.851829	-5.291
ENSG00000070423	RNF126	-0.432726	0.760273	-2.37951	0.0188861	0.441564	-3.17574
ENSG00000070444	MNT	-0.101238	2.58278	-0.498084	0.619322	0.919309	-5.51859
ENSG00000070476	ZXDC	-0.137553	1.06981	-0.971364	0.333289	0.808899	-5.13094
ENSG00000070495	JMJD6	0.136511	2.96436	0.742621	0.459139	0.863945	-5.39462
ENSG00000070501	POLB	0.422577	1.71448	2.11571	0.0364032	0.515615	-3.67635
ENSG00000070526	ST6GALNAC1	-0.176713	0.69924	-0.643427	0.521155	0.886459	-5.31723
ENSG00000070540	WIPI1	-0.126953	2.22484	-0.724123	0.470377	0.868396	-5.38411
ENSG00000070610	GBA2	-0.00123304	2.09658	-0.00912001	0.992738	0.999839	-5.60745
ENSG00000070614	NDST1	-0.126155	2.23988	-0.644246	0.520625	0.886459	-5.43313
ENSG00000070669	ASNS	-0.279071	0.0180188	-1.20525	0.230438	0.748736	-4.82227
ENSG00000070729	CNGB1	0.36106	0.571708	1.17651	0.24168	0.761793	-4.8867
ENSG00000070731	ST6GALNAC2	-0.129038	1.63949	-0.655204	0.51357	0.884748	-5.39468
ENSG00000070756	PABPC1	-0.206871	5.43527	-1.43584	0.153607	0.697943	-4.73742
ENSG00000070761	CFAP20	0.0450622	0.171683	0.183436	0.85476	0.973484	-5.41223
ENSG00000070770	CSNK2A2	-0.0777454	1.21868	-0.451571	0.65238	0.929765	-5.45709
ENSG00000070814	TCOF1	-0.243404	0.53136	-1.28814	0.200137	0.725138	-4.78622
ENSG00000070831	CDC42	0.0178507	4.88366	0.152076	0.879378	0.978112	-5.63396
ENSG00000070882	OSBPL3	-0.0879919	1.46353	-0.460653	0.645868	0.928826	-5.47458
ENSG00000070961	ATP2B1	0.377532	4.1961	1.55432	0.122698	0.662982	-4.58945
ENSG00000071051	NCK2	-0.0573249	1.14333	-0.323342	0.74699	0.953497	-5.49356
ENSG00000071054	MAP4K4	0.563687	4.51888	2.95214	0.0037861	0.340196	-1.93725
ENSG00000071073	MGAT4A	0.0657635	1.24975	0.280678	0.779433	0.959907	-5.51005
ENSG00000071082	RPL31	-0.122196	4.94322	-0.518106	0.605323	0.917375	-5.52487
ENSG00000071127	WDR1	0.00119974	5.58719	0.0122814	0.990221	0.99917	-5.63847
ENSG00000071189	SNX13	0.0830269	2.00168	0.566611	0.572019	0.907498	-5.46019
ENSG00000071205	ARHGAP10	0.0308739	0.327742	0.143107	0.886442	0.979883	-5.43298
ENSG00000071243	ING3	0.411793	0.203849	2.20316	0.0294614	0.48211	-3.48846
ENSG00000071246	VASH1	-0.175669	0.533552	-0.757119	0.450439	0.862067	-5.23387
ENSG00000071462	BUD23	-0.108186	1.70387	-0.58676	0.558449	0.903545	-5.43459
ENSG00000071537	SEL1L	-0.235049	2.61341	-1.15196	0.251589	0.767001	-5.04674
ENSG00000071553	ATP6AP1	-0.0555829	3.92418	-0.241296	0.809731	0.965803	-5.62048
ENSG00000071564	TCF3	0.239927	1.41528	1.3044	0.194553	0.723236	-4.82975
ENSG00000071575	TRIB2	0.482616	-0.153464	1.92269	0.0568496	0.564217	-3.927
ENSG00000071626	DAZAP1	-0.270067	2.2407	-1.44268	0.151673	0.69737	-4.71066
ENSG00000071655	MBD3	-0.372572	1.14908	-1.77506	0.0783814	0.598473	-4.21201
ENSG00000071859	FAM50A	0.273491	3.02343	1.43098	0.154992	0.698682	-4.7426
ENSG00000071889	FAM3A	-0.28771	0.861932	-1.56916	0.1192	0.661073	-4.47993
ENSG00000071894	CPSF1	-0.244365	1.53906	-1.33281	0.185079	0.71729	-4.8101
ENSG00000071994	PDCD2	-0.131822	0.687372	-0.716275	0.475191	0.870331	-5.27542
ENSG00000072042	RDH11	-0.327994	0.663346	-1.89117	0.0609729	0.569663	-4.01397
ENSG00000072062	PRKACA	-0.316184	2.77078	-2.14318	0.0340844	0.505177	-3.65018
ENSG00000072071	ADGRL1	-0.179524	0.435925	-0.911515	0.363822	0.822357	-5.11451
ENSG00000072080	SPP2	-0.0774866	0.228583	-0.165437	0.868874	0.975975	-5.41256
ENSG00000072110	ACTN1	-0.283106	5.06021	-2.27209	0.0248322	0.475581	-3.41316
ENSG00000072121	ZFYVE26	0.281095	1.74782	1.78691	0.0764355	0.597786	-4.21631
ENSG00000072134	EPN2	-0.010944	1.23075	-0.0419455	0.966611	0.99616	-5.54265
ENSG00000072135	PTPN18	-0.410662	2.38571	-2.43628	0.0162838	0.425309	-3.08278
ENSG00000072210	ALDH3A2	-0.387816	1.77625	-1.70808	0.0901657	0.613825	-4.33868
ENSG00000072274	TFRC	-0.105714	4.42316	-0.480725	0.631573	0.925331	-5.54362
ENSG00000072310	SREBF1	-0.198248	2.91629	-1.39478	0.165617	0.706382	-4.78603
ENSG00000072364	AFF4	0.244602	3.0928	1.70541	0.0906629	0.614376	-4.37196
ENSG00000072401	UBE2D1	0.208008	2.78028	1.10306	0.272173	0.778125	-5.09904
ENSG00000072415	MPP5	0.265438	0.350055	1.58776	0.114929	0.653589	-4.41568
ENSG00000072501	SMC1A	-0.308108	1.26998	-1.65078	0.101355	0.637615	-4.39628
ENSG00000072506	HSD17B10	-0.240028	0.703934	-0.960852	0.338527	0.810471	-5.10765
ENSG00000072518	MARK2	0.159354	3.11231	1.21089	0.228279	0.747529	-4.99673
ENSG00000072609	CHFR	-0.167294	3.07684	-1.13428	0.258902	0.77172	-5.07404
ENSG00000072682	P4HA2	0.000854129	1.80933	0.00316202	0.997482	0.999858	-5.58979
ENSG00000072694	FCGR2B	-0.174428	1.7373	-0.811876	0.418444	0.844967	-5.29852
ENSG00000072736	NFATC3	0.100634	0.749724	0.666155	0.50657	0.880749	-5.3058
ENSG00000072756	TRNT1	-0.0157735	0.792743	-0.0794165	0.936831	0.989098	-5.49332
ENSG00000072778	ACADVL	-0.323021	4.3957	-1.84402	0.0676067	0.578663	-4.16407
ENSG00000072786	STK10	0.0935782	5.01638	0.53752	0.591888	0.913251	-5.51582
ENSG00000072803	FBXW11	0.0918279	1.89352	0.554851	0.580012	0.910365	-5.46047
ENSG00000072818	ACAP1	-0.171293	3.16867	-0.83313	0.4064	0.842231	-5.33352
ENSG00000072849	DERL2	0.026578	1.65172	0.160275	0.872929	0.976897	-5.56866
ENSG00000072858	SIDT1	-0.0833802	0.303191	-0.286631	0.774881	0.959393	-5.40316
ENSG00000072864	NDE1	-0.182772	2.63659	-1.2374	0.218314	0.738517	-4.96012
ENSG00000072952	MRVI1	0.10479	0.758202	0.447321	0.655437	0.931239	-5.40601
ENSG00000072958	AP1M1	-0.133179	2.40742	-0.779209	0.437366	0.85612	-5.35526
ENSG00000073008	PVR	-0.339463	0.690412	-1.48776	0.139394	0.68507	-4.57343
ENSG00000073050	XRCC1	-0.541084	0.588053	-2.91388	0.00424752	0.344263	-2.0654
ENSG00000073060	SCARB1	-0.462268	0.806707	-2.43288	0.0164299	0.425622	-3.07323
ENSG00000073169	SELENOO	-0.0840465	0.306506	-0.406315	0.685223	0.938939	-5.37277
ENSG00000073331	ALPK1	0.0483734	3.4518	0.210653	0.833509	0.970211	-5.62335
ENSG00000073350	LLGL2	-0.399473	1.53195	-1.40285	0.163202	0.702855	-4.73013
ENSG00000073417	PDE8A	-0.105056	1.7147	-0.5181	0.605327	0.917375	-5.46733
ENSG00000073578	SDHA	-0.333093	2.22122	-2.21699	0.0284765	0.480848	-3.50706
ENSG00000073584	SMARCE1	-0.121281	1.73146	-0.775008	0.439835	0.856864	-5.32617
ENSG00000073614	KDM5A	0.298895	2.76388	2.17578	0.0314996	0.497588	-3.58951
ENSG00000073737	DHRS9	-0.0497404	1.3187	-0.169515	0.865673	0.975938	-5.54188
ENSG00000073756	PTGS2	0.420393	5.36974	1.03404	0.303162	0.793334	-5.17077
ENSG00000073792	IGF2BP2	-0.119421	1.38263	-0.468802	0.640048	0.926588	-5.46393
ENSG00000073803	MAP3K13	0.331224	1.6158	1.95018	0.0534483	0.558809	-3.95493
ENSG00000073849	ST6GAL1	0.053008	1.54746	0.262725	0.793206	0.962008	-5.53977
ENSG00000073910	FRY	-0.125983	1.02278	-0.750783	0.454229	0.863043	-5.28572
ENSG00000073921	PICALM	0.168025	5.54757	1.02846	0.305766	0.793334	-5.17443
ENSG00000073969	NSF	0.156365	1.57632	1.05018	0.295712	0.78921	-5.09687
ENSG00000074054	CLASP1	0.170736	1.7573	1.19084	0.236027	0.755846	-4.97262
ENSG00000074071	MRPS34	-0.183737	0.425758	-0.726193	0.469112	0.868396	-5.24167
ENSG00000074201	CLNS1A	0.0873836	1.77314	0.504329	0.61494	0.919117	-5.4761
ENSG00000074319	TSG101	0.220726	2.39601	1.23472	0.219307	0.738828	-4.95457
ENSG00000074356	NCBP3	-0.224803	1.35362	-1.53118	0.128314	0.672259	-4.56019
ENSG00000074370	ATP2A3	0.044355	2.87252	0.209481	0.834422	0.970211	-5.61605
ENSG00000074416	MGLL	0.116036	2.8733	0.501438	0.616967	0.919117	-5.52411
ENSG00000074603	DPP8	0.0655343	1.15412	0.397715	0.691536	0.940291	-5.46618
ENSG00000074621	SLC24A1	0.237085	0.371046	1.11221	0.268234	0.777759	-4.93373
ENSG00000074657	ZNF532	0.168817	1.01178	0.590533	0.555926	0.903545	-5.36798
ENSG00000074660	SCARF1	-0.0105703	2.8688	-0.0359295	0.971397	0.996588	-5.63527
ENSG00000074695	LMAN1	-0.440874	0.943407	-1.95726	0.0526006	0.558239	-3.92276
ENSG00000074696	HACD3	0.0687518	0.850019	0.281668	0.778675	0.959907	-5.46721
ENSG00000074706	IPCEF1	0.199827	1.05047	0.921835	0.358434	0.820074	-5.16106
ENSG00000074755	ZZEF1	-0.0140631	2.10749	-0.111982	0.911022	0.984964	-5.60205
ENSG00000074800	ENO1	-0.272649	5.4081	-1.88553	0.0617366	0.569989	-4.09452
ENSG00000074842	MYDGF	-0.364501	2.37914	-1.51133	0.13329	0.677744	-4.62677
ENSG00000074935	TUBE1	0.09352	1.00427	0.326501	0.744605	0.953105	-5.47072
ENSG00000074964	ARHGEF10L	0.0179206	1.86977	0.0883471	0.929746	0.988617	-5.58901
ENSG00000075089	ACTR6	0.116606	0.914948	0.527406	0.59887	0.916269	-5.39112
ENSG00000075142	SRI	-0.0989087	2.40802	-0.442459	0.65894	0.932766	-5.53579
ENSG00000075151	EIF4G3	0.404719	2.58159	2.37819	0.0189506	0.441564	-3.20039
ENSG00000075223	SEMA3C	-0.448028	1.91151	-1.99998	0.0477234	0.545517	-3.88489
ENSG00000075234	TTC38	-0.228541	1.04141	-1.03839	0.301142	0.792803	-5.06899
ENSG00000075239	ACAT1	-0.045534	1.89387	-0.240817	0.810102	0.965803	-5.56767
ENSG00000075240	GRAMD4	0.0519317	1.43042	0.225596	0.821893	0.968314	-5.53842
ENSG00000075275	CELSR1	-0.539545	0.397353	-1.89734	0.0601467	0.568764	-3.9939
ENSG00000075292	ZNF638	0.21738	3.68747	1.1679	0.245126	0.764752	-5.04546
ENSG00000075303	SLC25A40	-0.0743843	0.944858	-0.340098	0.734368	0.951649	-5.46752
ENSG00000075399	VPS9D1	-0.27447	3.59746	-1.1207	0.264617	0.775033	-5.09216
ENSG00000075407	ZNF37A	-0.29332	0.325977	-1.30864	0.193117	0.722441	-4.74471
ENSG00000075413	MARK3	0.289745	3.5426	2.25241	0.0260844	0.478039	-3.45172
ENSG00000075415	SLC25A3	-0.307252	3.64512	-1.99083	0.0487342	0.547024	-3.92297
ENSG00000075420	FNDC3B	0.404123	5.2704	2.21768	0.0284282	0.480848	-3.51615
ENSG00000075426	FOSL2	0.225942	5.48432	1.21728	0.225849	0.745572	-4.98977
ENSG00000075539	FRYL	0.0276885	2.28686	0.185217	0.853366	0.973411	-5.60016
ENSG00000075568	TMEM131	-0.181985	1.3984	-1.04112	0.299881	0.792551	-5.09644
ENSG00000075624	ACTB	-0.198984	10.0286	-1.22621	0.22248	0.743665	-4.94381
ENSG00000075651	PLD1	0.374332	2.58676	1.6647	0.098539	0.632758	-4.42037
ENSG00000075711	DLG1	-0.00329298	1.40388	-0.0206031	0.983596	0.997935	-5.56015
ENSG00000075785	RAB7A	0.0529882	5.06346	0.423687	0.67254	0.936697	-5.56375
ENSG00000075790	BCAP29	0.0677514	0.726912	0.320874	0.748855	0.953583	-5.44734
ENSG00000075856	SART3	-0.0601879	1.63791	-0.374557	0.70864	0.94593	-5.51862
ENSG00000075884	ARHGAP15	0.389194	3.53281	1.38893	0.167383	0.708093	-4.7981
ENSG00000075914	EXOSC7	-0.0971997	0.223108	-0.453599	0.650924	0.929014	-5.34799
ENSG00000076043	REXO2	0.215306	0.424393	0.874617	0.383501	0.835033	-5.13543
ENSG00000076053	RBM7	0.393017	1.40812	2.05432	0.0420812	0.531768	-3.77444
ENSG00000076067	RBMS2	-0.0381019	0.766699	-0.147752	0.882782	0.978873	-5.48674
ENSG00000076108	BAZ2A	0.124951	3.67346	0.900356	0.369705	0.825465	-5.28863
ENSG00000076201	PTPN23	-0.313888	1.62642	-1.81723	0.0716361	0.588489	-4.16971
ENSG00000076242	MLH1	0.106369	1.42974	0.715438	0.475706	0.870331	-5.33988
ENSG00000076382	SPAG5	-0.299945	0.600554	-1.36448	0.174929	0.712539	-4.70921
ENSG00000076513	ANKRD13A	0.114136	2.96768	0.814128	0.417158	0.844618	-5.34607
ENSG00000076554	TPD52	-0.335963	0.782524	-1.13439	0.258854	0.77172	-4.96422
ENSG00000076555	ACACB	-0.0377025	1.68459	-0.166056	0.868388	0.975938	-5.569
ENSG00000076604	TRAF4	-0.213167	1.48754	-0.819971	0.413832	0.843943	-5.28029
ENSG00000076641	PAG1	-0.00305328	3.48681	-0.0117467	0.990647	0.99917	-5.64416
ENSG00000076662	ICAM3	-0.419856	3.38037	-1.62133	0.10753	0.644654	-4.49415
ENSG00000076685	NT5C2	0.0856369	4.03149	0.539695	0.590391	0.912658	-5.51806
ENSG00000076924	XAB2	-0.201923	0.796889	-1.25372	0.212341	0.733176	-4.8442
ENSG00000076928	ARHGEF1	-0.194166	4.24823	-1.04139	0.299754	0.792551	-5.16881
ENSG00000076944	STXBP2	-0.145399	6.2385	-0.867077	0.387602	0.836744	-5.30193
ENSG00000076984	MAP2K7	-0.343195	1.07906	-2.16982	0.0319588	0.498578	-3.56685
ENSG00000077044	DGKD	0.0439711	2.8906	0.19578	0.845108	0.971307	-5.61872
ENSG00000077097	TOP2B	0.213333	1.26389	1.35706	0.177267	0.714844	-4.76187
ENSG00000077147	TM9SF3	0.0867243	2.27094	0.502465	0.616246	0.919117	-5.50455
ENSG00000077150	NFKB2	0.416489	4.93482	1.97486	0.0505421	0.55109	-3.94966
ENSG00000077157	PPP1R12B	-0.551259	1.12225	-2.51119	0.0133401	0.408333	-2.91902
ENSG00000077232	DNAJC10	0.163902	1.01721	0.717466	0.474458	0.870331	-5.30204
ENSG00000077235	GTF3C1	0.121946	1.15629	0.689678	0.491707	0.874075	-5.33165
ENSG00000077238	IL4R	0.0543013	5.63965	0.275835	0.783141	0.961275	-5.60477
ENSG00000077254	USP33	0.00433877	2.571	0.0263838	0.978994	0.997084	-5.62531
ENSG00000077312	SNRPA	-0.156874	1.29976	-0.904407	0.367562	0.825465	-5.20295
ENSG00000077327	SPAG6	-0.232565	0.228457	-0.723941	0.470488	0.868396	-5.22666
ENSG00000077380	DYNC1I2	0.0583257	2.25053	0.314696	0.75353	0.953793	-5.57079
ENSG00000077420	APBB1IP	-0.069885	3.51695	-0.343573	0.731759	0.951004	-5.5923
ENSG00000077454	LRCH4	-0.188381	3.49595	-1.06943	0.286987	0.783614	-5.14155
ENSG00000077458	FAM76B	-0.0768662	1.34679	-0.348674	0.727935	0.950244	-5.50245
ENSG00000077463	SIRT6	0.162803	1.43263	1.03113	0.304518	0.793334	-5.10332
ENSG00000077514	POLD3	0.0650965	1.09148	0.385289	0.700694	0.944106	-5.46533
ENSG00000077549	CAPZB	0.0213465	4.43267	0.158629	0.874224	0.976968	-5.63519
ENSG00000077585	GPR137B	0.0143808	2.78636	0.0710873	0.943445	0.990286	-5.62988
ENSG00000077684	JADE1	-0.0184584	0.328462	-0.0946465	0.924751	0.988617	-5.43601
ENSG00000077721	UBE2A	-0.120259	2.56884	-0.650845	0.516371	0.885112	-5.44088
ENSG00000077782	FGFR1	-0.144999	1.1225	-0.519461	0.604381	0.917375	-5.4207
ENSG00000077984	CST7	-0.0229368	3.77873	-0.069615	0.944614	0.990286	-5.6426
ENSG00000078043	PIAS2	-0.101733	0.71448	-0.427216	0.669975	0.936697	-5.41188
ENSG00000078061	ARAF	-0.280444	1.91617	-1.76552	0.0799777	0.598473	-4.2575
ENSG00000078070	MCCC1	0.345384	0.228587	1.40209	0.163427	0.702855	-4.62646
ENSG00000078081	LAMP3	0.810142	0.534472	2.7438	0.00698989	0.374379	-2.4518
ENSG00000078098	FAP	0.383467	-0.750202	1.0749	0.28454	0.781866	-4.84997
ENSG00000078114	NEBL	-0.625466	0.557038	-2.08716	0.0389556	0.522208	-3.69553
ENSG00000078124	ACER3	-0.388626	1.80089	-1.97429	0.050608	0.55109	-3.92484
ENSG00000078140	UBE2K	-0.156968	2.05122	-0.733204	0.46484	0.866468	-5.37006
ENSG00000078142	PIK3C3	0.0564607	1.74378	0.396183	0.692662	0.940621	-5.51565
ENSG00000078269	SYNJ2	0.40618	0.840651	1.90594	0.0590115	0.56835	-3.991
ENSG00000078304	PPP2R5C	0.307384	4.08357	2.41132	0.0173858	0.437473	-3.14006
ENSG00000078369	GNB1	0.160931	4.98793	1.30017	0.195993	0.724232	-4.90188
ENSG00000078401	EDN1	0.785389	0.834646	2.37213	0.0192499	0.441564	-3.18856
ENSG00000078403	MLLT10	0.00623968	1.60355	0.0324597	0.974158	0.996588	-5.57351
ENSG00000078487	ZCWPW1	0.289724	1.51174	1.32133	0.188865	0.720338	-4.81584
ENSG00000078618	NRDC	0.295056	4.01569	2.03241	0.0442828	0.541112	-3.8525
ENSG00000078668	VDAC3	-0.312214	1.39963	-1.62831	0.106039	0.643952	-4.43389
ENSG00000078674	PCM1	0.147115	3.03726	0.907748	0.365801	0.824203	-5.27655
ENSG00000078687	TNRC6C	-0.243804	0.232561	-1.36662	0.174257	0.711894	-4.67446
ENSG00000078699	CBFA2T2	-0.0691506	0.380589	-0.450443	0.653191	0.930133	-5.36342
ENSG00000078747	ITCH	-0.095769	2.60518	-0.632481	0.528256	0.889739	-5.45268
ENSG00000078804	TP53INP2	0.11631	2.23635	0.553131	0.581186	0.910523	-5.47796
ENSG00000078808	SDF4	-0.110718	3.3265	-0.707388	0.480674	0.871384	-5.42189
ENSG00000078814	MYH7B	-0.278266	0.10041	-1.41368	0.160004	0.701593	-4.61129
ENSG00000078902	TOLLIP	0.127065	2.76744	0.822452	0.412424	0.843943	-5.33528
ENSG00000078967	UBE2D4	-0.549724	1.41569	-1.51258	0.132973	0.67727	-4.58843
ENSG00000079134	THOC1	-0.434328	0.635112	-2.14509	0.033928	0.505177	-3.59899
ENSG00000079215	SLC1A3	0.216758	2.25452	0.877514	0.381932	0.834086	-5.27331
ENSG00000079246	XRCC5	-0.0201494	3.13009	-0.14258	0.886857	0.979933	-5.63165
ENSG00000079263	SP140	1.11339	2.33858	4.52409	1.41799e-05	0.119137	2.5743
ENSG00000079277	MKNK1	0.0839006	4.70897	0.442561	0.658867	0.932766	-5.55864
ENSG00000079308	TNS1	0.224422	2.41505	0.946309	0.345862	0.813646	-5.22719
ENSG00000079313	REXO1	-0.161015	2.01881	-0.593974	0.55363	0.902204	-5.44987
ENSG00000079332	SAR1A	0.229051	2.39455	1.58351	0.115894	0.657179	-4.53067
ENSG00000079335	CDC14A	0.078712	0.571064	0.478256	0.633324	0.925564	-5.37343
ENSG00000079385	CEACAM1	0.121491	2.84939	0.494781	0.621645	0.920877	-5.52381
ENSG00000079387	SENP1	0.133026	0.763855	0.758455	0.449641	0.861943	-5.24882
ENSG00000079432	CIC	0.0171279	2.68091	0.108496	0.91378	0.986033	-5.62525
ENSG00000079459	FDFT1	-0.241539	2.1553	-1.22394	0.223334	0.744558	-4.95989
ENSG00000079739	PGM1	-0.117991	0.707711	-0.61521	0.539562	0.896144	-5.33287
ENSG00000079785	DDX1	0.379542	0.522389	1.70719	0.0903308	0.614376	-4.26791
ENSG00000079805	DNM2	-0.1644	4.92243	-1.21147	0.228057	0.747529	-4.999
ENSG00000079819	EPB41L2	-0.136256	0.762654	-0.542525	0.588447	0.912522	-5.37264
ENSG00000079950	STX7	0.106804	2.53148	0.622484	0.534786	0.893019	-5.45478
ENSG00000079974	RABL2B	-0.301963	1.47946	-1.19347	0.235003	0.755306	-4.95728
ENSG00000079999	KEAP1	0.100198	1.48655	0.553777	0.580745	0.910523	-5.43423
ENSG00000080189	SLC35C2	-0.104724	1.34788	-0.665345	0.507086	0.880749	-5.36607
ENSG00000080298	RFX3	-0.250164	0.996605	-1.24434	0.215759	0.73601	-4.87059
ENSG00000080345	RIF1	0.0887302	0.794587	0.62843	0.530897	0.891226	-5.32967
ENSG00000080371	RAB21	0.209748	3.22523	1.13385	0.25908	0.77172	-5.07683
ENSG00000080503	SMARCA2	-0.404077	3.7916	-1.51382	0.132658	0.676624	-4.64184
ENSG00000080603	SRCAP	-0.138054	1.98042	-0.989517	0.324369	0.803404	-5.1758
ENSG00000080608	PUM3	-0.185998	0.299929	-0.852327	0.395703	0.840018	-5.14574
ENSG00000080802	CNOT4	-0.0877856	0.926168	-0.59876	0.550443	0.901062	-5.36331
ENSG00000080815	PSEN1	0.103578	4.07741	0.64624	0.519338	0.886459	-5.46238
ENSG00000080822	CLDND1	0.0655452	2.00392	0.33343	0.739382	0.951808	-5.55252
ENSG00000080823	MOK	-0.111871	1.85282	-0.39322	0.694844	0.941938	-5.52508
ENSG00000080824	HSP90AA1	0.210478	5.63262	1.01277	0.313173	0.797011	-5.18764
ENSG00000080845	DLGAP4	0.122748	2.51973	0.754744	0.451857	0.862365	-5.37503
ENSG00000081019	RSBN1	-0.190869	0.667244	-0.924163	0.357226	0.820074	-5.13027
ENSG00000081041	CXCL2	0.26787	5.32463	0.916276	0.36133	0.821462	-5.27095
ENSG00000081059	TCF7	-0.0712617	0.351154	-0.346672	0.729435	0.950325	-5.39343
ENSG00000081087	OSTM1	0.0467378	2.73388	0.284618	0.776419	0.959393	-5.59595
ENSG00000081154	PCNP	0.0942059	2.12561	0.507565	0.612675	0.918545	-5.49535
ENSG00000081189	MEF2C	-0.204142	2.03367	-0.609659	0.543222	0.898112	-5.44175
ENSG00000081237	PTPRC	0.0944326	6.25134	0.475205	0.635491	0.926004	-5.53307
ENSG00000081307	UBA5	-0.104773	0.502321	-0.446253	0.656205	0.931462	-5.38439
ENSG00000081320	STK17B	0.275405	3.8118	1.2859	0.200913	0.725138	-4.92034
ENSG00000081665	ZNF506	-0.350494	1.32903	-1.95639	0.0527042	0.558239	-3.93854
ENSG00000081760	AACS	-0.122079	1.80178	-0.451328	0.652554	0.929765	-5.50086
ENSG00000081791	DELE1	0.0401239	1.50724	0.241313	0.809718	0.965803	-5.54281
ENSG00000081870	HSPB11	0.168559	0.249562	0.695196	0.488255	0.87344	-5.23121
ENSG00000081913	PHLPP1	0.122124	1.23132	0.677784	0.499192	0.878004	-5.34588
ENSG00000081923	ATP8B1	0.0796257	0.133769	0.317461	0.751437	0.953583	-5.36911
ENSG00000082014	SMARCD3	-0.0548548	0.966785	-0.229942	0.818522	0.967768	-5.49219
ENSG00000082068	WDR70	-0.0394612	0.393757	-0.203828	0.838827	0.970304	-5.43344
ENSG00000082074	FYB1	0.180919	4.48802	0.857632	0.392778	0.839046	-5.32163
ENSG00000082153	BZW1	0.148938	3.93352	0.96437	0.336768	0.809698	-5.23686
ENSG00000082212	ME2	-0.0944272	1.9615	-0.63584	0.526072	0.888926	-5.42467
ENSG00000082213	C5orf22	0.105733	0.347583	0.511516	0.609914	0.917375	-5.33474
ENSG00000082258	CCNT2	0.337733	1.50264	1.9166	0.0576278	0.564968	-4.00514
ENSG00000082397	EPB41L3	0.0159247	3.04538	0.0826692	0.93425	0.988873	-5.6359
ENSG00000082515	MRPL22	-0.54957	-0.0628265	-2.659	0.00888902	0.383637	-2.64342
ENSG00000082641	NFE2L1	-0.411535	2.75464	-1.90707	0.0588636	0.56835	-4.05454
ENSG00000082701	GSK3B	-0.252866	1.77887	-1.68474	0.0945945	0.624958	-4.37108
ENSG00000082781	ITGB5	-0.7745	1.23373	-2.96817	0.00360687	0.340196	-1.91547
ENSG00000082805	ERC1	-0.297469	1.99937	-1.75151	0.0823715	0.598473	-4.28133
ENSG00000082898	XPO1	0.142455	3.01888	0.916602	0.36116	0.821455	-5.2685
ENSG00000082996	RNF13	0.303296	4.64024	1.62042	0.107724	0.644706	-4.49775
ENSG00000083099	LYRM2	0.229423	0.544837	1.16553	0.246079	0.764807	-4.9024
ENSG00000083168	KAT6A	0.122064	2.8362	0.805787	0.421934	0.848003	-5.34852
ENSG00000083223	TUT7	0.206834	3.36199	1.01126	0.313893	0.797055	-5.19239
ENSG00000083290	ULK2	-0.556703	0.820255	-2.42268	0.0168763	0.434895	-3.09309
ENSG00000083312	TNPO1	-0.122472	2.66841	-0.884139	0.378361	0.830901	-5.28675
ENSG00000083444	PLOD1	-0.416903	1.8141	-2.21792	0.0284116	0.480848	-3.49779
ENSG00000083457	ITGAE	-0.181831	1.35706	-0.966638	0.335637	0.80941	-5.15661
ENSG00000083520	DIS3	-0.078942	0.417384	-0.484512	0.628891	0.92443	-5.35915
ENSG00000083535	PIBF1	0.0750847	-0.0639106	0.383443	0.702059	0.944557	-5.33109
ENSG00000083642	PDS5B	-0.0865599	0.984174	-0.631202	0.52909	0.890166	-5.35258
ENSG00000083799	CYLD	0.320852	2.8265	1.9479	0.0537243	0.558809	-3.98902
ENSG00000083828	ZNF586	-0.0496692	1.21221	-0.308346	0.758345	0.955354	-5.50139
ENSG00000083844	ZNF264	-0.0105873	1.03772	-0.0575356	0.954213	0.992239	-5.5247
ENSG00000083845	RPS5	-0.360976	4.07225	-1.4792	0.141665	0.687238	-4.68771
ENSG00000083857	FAT1	0.0828854	0.292705	0.296068	0.767682	0.95809	-5.39796
ENSG00000083896	YTHDC1	0.139571	2.88668	0.770361	0.442575	0.858449	-5.37441
ENSG00000083937	CHMP2B	0.645749	1.95107	3.45692	0.000752722	0.308698	-0.661371
ENSG00000084070	SMAP2	0.191347	4.03252	0.906667	0.36637	0.82492	-5.28323
ENSG00000084072	PPIE	-0.0491444	0.546974	-0.218399	0.827483	0.969687	-5.44728
ENSG00000084073	ZMPSTE24	-0.164574	1.22263	-0.965845	0.336032	0.80941	-5.14796
ENSG00000084090	STARD7	0.158196	1.7626	0.851944	0.395914	0.840018	-5.27049
ENSG00000084093	REST	-0.116314	1.0809	-0.719206	0.473389	0.870331	-5.31148
ENSG00000084110	HAL	0.238908	1.75502	0.704782	0.482289	0.872054	-5.36632
ENSG00000084112	SSH1	-0.359352	2.33567	-1.72509	0.0870444	0.607548	-4.33078
ENSG00000084207	GSTP1	-0.687555	4.2044	-1.89966	0.0598383	0.568437	-4.07412
ENSG00000084234	APLP2	-0.167746	5.61089	-1.38315	0.169145	0.710184	-4.80082
ENSG00000084463	WBP11	0.101478	1.11896	0.596205	0.552143	0.901355	-5.38207
ENSG00000084623	EIF3I	-0.180092	2.47863	-1.06482	0.289061	0.784298	-5.12628
ENSG00000084652	TXLNA	-0.304617	0.725837	-1.5063	0.134576	0.679717	-4.5523
ENSG00000084676	NCOA1	-0.0378963	2.55634	-0.200648	0.841308	0.970304	-5.60872
ENSG00000084733	RAB10	-0.0467486	4.10342	-0.298527	0.765809	0.958015	-5.60721
ENSG00000084754	HADHA	-0.366966	2.49088	-2.77794	0.00633568	0.374379	-2.3469
ENSG00000084764	MAPRE3	-0.12678	0.646122	-0.551802	0.582094	0.910701	-5.35426
ENSG00000084774	CAD	0.154738	0.464054	0.583129	0.560883	0.904405	-5.31298
ENSG00000085063	CD59	-0.116563	3.69974	-0.534567	0.593922	0.91448	-5.51961
ENSG00000085117	CD82	0.30857	5.27766	1.57806	0.117142	0.659317	-4.55339
ENSG00000085224	ATRX	0.199956	2.43296	1.18455	0.2385	0.760296	-5.00823
ENSG00000085231	AK6	0.58136	0.927499	2.57644	0.0111741	0.39258	-2.78716
ENSG00000085265	FCN1	-0.198611	1.77133	-0.855771	0.393802	0.840018	-5.27085
ENSG00000085276	MECOM	-0.0477196	0.309616	-0.148856	0.881913	0.978873	-5.42705
ENSG00000085365	SCAMP1	0.205723	0.492965	1.1129	0.267941	0.777487	-4.95087
ENSG00000085415	SEH1L	-0.1437	0.686647	-0.771921	0.441654	0.858449	-5.23864
ENSG00000085433	WDR47	0.0118556	0.591742	0.0592013	0.952889	0.992239	-5.47222
ENSG00000085449	WDFY1	0.205966	2.59689	1.19658	0.233789	0.754069	-5.00004
ENSG00000085491	SLC25A24	-0.0694702	1.17758	-0.338065	0.735895	0.951649	-5.49136
ENSG00000085511	MAP3K4	-0.0949183	0.551453	-0.44892	0.654286	0.930885	-5.38737
ENSG00000085514	PILRA	0.214087	4.48519	1.09562	0.275402	0.780464	-5.11802
ENSG00000085662	AKR1B1	-0.498971	2.03767	-1.76385	0.0802602	0.598473	-4.26462
ENSG00000085719	CPNE3	-0.104679	1.63667	-0.514964	0.60751	0.917375	-5.46463
ENSG00000085721	RRN3	-0.133556	0.502106	-0.71962	0.473135	0.870331	-5.25238
ENSG00000085733	CTTN	-0.316195	1.17617	-1.02059	0.309466	0.795401	-5.10002
ENSG00000085788	DDHD2	-0.0343896	0.596532	-0.152604	0.878963	0.978112	-5.46354
ENSG00000085831	TTC39A	-0.339451	0.0511987	-1.33255	0.185165	0.71734	-4.6959
ENSG00000085832	EPS15	0.188065	2.09131	1.35687	0.177328	0.714844	-4.8066
ENSG00000085871	MGST2	-0.0129078	0.475614	-0.0584982	0.953447	0.992239	-5.45893
ENSG00000085872	CHERP	-0.029023	1.22365	-0.215699	0.829583	0.969851	-5.52464
ENSG00000085978	ATG16L1	-0.308271	1.04951	-1.76125	0.0807012	0.598473	-4.22759
ENSG00000085982	USP40	-0.312475	0.553615	-1.08587	0.279677	0.781534	-4.98621
ENSG00000085998	POMGNT1	-0.677245	0.446258	-3.09723	0.00242439	0.335208	-1.65062
ENSG00000086015	MAST2	-0.561339	0.878843	-3.09666	0.00242865	0.335208	-1.62356
ENSG00000086061	DNAJA1	0.2436	3.95436	1.50425	0.135103	0.68056	-4.65552
ENSG00000086062	B4GALT1	0.0252209	3.24972	0.146635	0.883662	0.978873	-5.63237
ENSG00000086065	CHMP5	0.288158	2.0612	1.60154	0.111843	0.652627	-4.49488
ENSG00000086102	NFX1	0.0675092	1.32047	0.396678	0.692298	0.940516	-5.48308
ENSG00000086200	IPO11	0.353096	1.49081	1.6411	0.103353	0.641217	-4.41307
ENSG00000086232	EIF2AK1	-0.317791	1.30528	-1.73639	0.0850191	0.603611	-4.27605
ENSG00000086300	SNX10	0.258428	4.24656	1.26385	0.208695	0.730007	-4.94491
ENSG00000086504	MRPL28	-0.155604	1.29051	-0.980266	0.328895	0.807392	-5.14149
ENSG00000086544	ITPKC	0.47495	1.24872	2.17495	0.0315627	0.497588	-3.55935
ENSG00000086548	CEACAM6	0.0380964	1.58798	0.118413	0.905935	0.983571	-5.56848
ENSG00000086589	RBM22	0.262163	1.90642	1.6619	0.0991012	0.633067	-4.40558
ENSG00000086598	TMED2	-0.237362	2.9195	-1.12774	0.261642	0.773222	-5.07827
ENSG00000086619	ERO1B	0.247058	0.0862012	1.28431	0.201465	0.725138	-4.74117
ENSG00000086666	ZFAND6	0.269518	3.23612	1.75185	0.0823133	0.598473	-4.30431
ENSG00000086730	LAT2	-0.131493	3.68646	-0.708217	0.480161	0.871324	-5.42461
ENSG00000086758	HUWE1	0.0233376	2.62648	0.178516	0.858614	0.974238	-5.61446
ENSG00000086848	ALG9	-0.106968	1.24509	-0.439397	0.661151	0.933763	-5.4638
ENSG00000087008	ACOX3	0.16097	0.552717	0.890182	0.37512	0.829252	-5.13758
ENSG00000087074	PPP1R15A	0.48439	6.37723	2.37202	0.0192552	0.441564	-3.21458
ENSG00000087077	TRIP6	-0.410386	0.822168	-2.05302	0.0422083	0.531977	-3.76121
ENSG00000087086	FTL	-0.302849	10.2072	-1.59045	0.114321	0.653589	-4.50431
ENSG00000087087	SRRT	-0.10977	2.80216	-0.719102	0.473453	0.870331	-5.406
ENSG00000087088	BAX	-0.125525	2.86156	-0.632575	0.528195	0.889739	-5.45942
ENSG00000087111	PIGS	-0.222412	1.10242	-1.25799	0.210798	0.7302	-4.86414
ENSG00000087152	ATXN7L3	0.0634508	2.77163	0.418164	0.676562	0.938086	-5.55545
ENSG00000087157	PGS1	-0.120337	4.44128	-0.540266	0.589999	0.912585	-5.51716
ENSG00000087191	PSMC5	0.081722	2.11287	0.449214	0.654074	0.930718	-5.51802
ENSG00000087206	UIMC1	0.0344974	2.20863	0.207751	0.83577	0.970211	-5.59238
ENSG00000087237	CETP	0.131145	-0.456134	0.534459	0.593997	0.91448	-5.21535
ENSG00000087253	LPCAT2	0.0527559	2.43845	0.252042	0.801432	0.964816	-5.5933
ENSG00000087263	OGFOD1	0.021025	0.323414	0.0910424	0.927608	0.988617	-5.43946
ENSG00000087266	SH3BP2	-0.0830502	5.08626	-0.433321	0.665547	0.935281	-5.55969
ENSG00000087274	ADD1	0.0771845	3.53004	0.56336	0.574224	0.908459	-5.50502
ENSG00000087302	RTRAF	0.0733125	2.08175	0.462712	0.644395	0.928826	-5.51207
ENSG00000087338	GMCL1	0.0083664	1.05402	0.0460186	0.963371	0.99526	-5.52425
ENSG00000087365	SF3B2	-0.0767907	3.25543	-0.689854	0.491596	0.874075	-5.43207
ENSG00000087460	GNAS	-0.343652	5.29761	-2.37136	0.0192881	0.441564	-3.21853
ENSG00000087470	DNM1L	-0.068913	1.71059	-0.418184	0.676548	0.938086	-5.50737
ENSG00000087502	ERGIC2	-0.18125	1.71529	-0.816682	0.415702	0.844043	-5.29713
ENSG00000087589	CASS4	-0.42861	0.825778	-1.7434	0.0837834	0.601265	-4.24154
ENSG00000087884	AAMDC	-0.284434	0.87392	-1.03285	0.303715	0.793334	-5.0622
ENSG00000087903	RFX2	-0.19454	3.23834	-1.07729	0.283475	0.781534	-5.1317
ENSG00000088038	CNOT3	-0.160533	2.07309	-0.999752	0.319409	0.800486	-5.17092
ENSG00000088205	DDX18	0.18159	1.61239	1.05137	0.295168	0.78921	-5.0971
ENSG00000088247	KHSRP	-0.448513	2.99846	-2.35922	0.0199014	0.447729	-3.24149
ENSG00000088256	GNA11	-0.475829	1.10928	-1.76007	0.0809031	0.598473	-4.23314
ENSG00000088280	ASAP3	0.261635	0.978742	0.839024	0.403097	0.840982	-5.21315
ENSG00000088298	EDEM2	-0.00532409	1.47437	-0.0236281	0.981188	0.997834	-5.56497
ENSG00000088367	EPB41L1	-0.592515	0.792075	-1.91095	0.0583573	0.567097	-3.99061
ENSG00000088387	DOCK9	-0.120622	0.430416	-0.459207	0.646903	0.928826	-5.37035
ENSG00000088448	ANKRD10	-0.257976	4.53776	-1.11267	0.268037	0.777487	-5.1005
ENSG00000088682	COQ9	-0.170163	0.305345	-0.747119	0.456429	0.863763	-5.21332
ENSG00000088727	KIF9	0.0829578	0.141856	0.311972	0.755594	0.954297	-5.37735
ENSG00000088766	CRLS1	0.135083	0.522979	0.640447	0.523083	0.887423	-5.29237
ENSG00000088808	PPP1R13B	-0.396892	0.761369	-1.62205	0.107374	0.644654	-4.40552
ENSG00000088826	SMOX	0.105805	0.660653	0.414434	0.679284	0.938133	-5.40773
ENSG00000088827	SIGLEC1	0.0741599	0.657406	0.183931	0.854373	0.973484	-5.46996
ENSG00000088832	FKBP1A	-0.128174	4.72969	-0.852724	0.395483	0.840018	-5.32402
ENSG00000088833	NSFL1C	0.147849	2.75933	0.906335	0.366545	0.825044	-5.2711
ENSG00000088836	SLC4A11	-0.352744	0.481425	-0.969626	0.334151	0.80941	-5.07884
ENSG00000088930	XRN2	-0.00338693	1.71942	-0.0169943	0.986469	0.998232	-5.58288
ENSG00000088986	DYNLL1	-0.196809	3.67963	-0.767093	0.444508	0.859756	-5.38536
ENSG00000088992	TESC	0.0731183	0.0541765	0.250125	0.802911	0.965015	-5.37651
ENSG00000089006	SNX5	0.094197	2.26679	0.610555	0.54263	0.897813	-5.45121
ENSG00000089009	RPL6	-0.329227	4.52893	-1.68985	0.0936114	0.62327	-4.39843
ENSG00000089022	MAPKAPK5	-0.0687361	0.702104	-0.429292	0.668468	0.936697	-5.41284
ENSG00000089041	P2RX7	0.136144	1.67033	0.547373	0.585123	0.911817	-5.44833
ENSG00000089053	ANAPC5	0.00796482	2.15861	0.0521549	0.958491	0.993495	-5.60866
ENSG00000089057	SLC23A2	0.0151488	0.448545	0.0725521	0.942281	0.990286	-5.45327
ENSG00000089060	SLC8B1	-0.176126	2.30477	-1.11052	0.268959	0.778125	-5.07847
ENSG00000089063	TMEM230	-0.163184	1.74158	-0.997559	0.320468	0.801338	-5.15666
ENSG00000089094	KDM2B	-0.345418	1.07818	-1.84403	0.0676056	0.578663	-4.10507
ENSG00000089101	CFAP61	-0.44153	0.15941	-1.27994	0.202996	0.726484	-4.76307
ENSG00000089127	OAS1	0.431742	2.25312	1.24772	0.214523	0.734526	-4.92919
ENSG00000089154	GCN1	-0.43192	1.75315	-1.88768	0.061445	0.569663	-4.06395
ENSG00000089157	RPLP0	-0.282307	4.6886	-1.28765	0.200306	0.725138	-4.91652
ENSG00000089159	PXN	-0.163508	4.32071	-0.762956	0.446963	0.86085	-5.38949
ENSG00000089220	PEBP1	-0.506926	2.14787	-2.2971	0.0233176	0.468086	-3.35455
ENSG00000089248	ERP29	-0.195285	1.64162	-1.09429	0.275985	0.780464	-5.06346
ENSG00000089280	FUS	0.0376373	4.2828	0.342145	0.73283	0.951004	-5.59472
ENSG00000089289	IGBP1	0.11454	0.573508	0.683165	0.495798	0.876236	-5.27657
ENSG00000089327	FXYD5	-0.274097	3.50422	-1.34387	0.181485	0.715313	-4.852
ENSG00000089335	ZNF302	-0.287636	0.337365	-1.02216	0.308726	0.795119	-5.02083
ENSG00000089351	GRAMD1A	0.393812	5.65039	1.5378	0.126687	0.669051	-4.60566
ENSG00000089356	FXYD3	-0.404875	1.51403	-1.06202	0.290325	0.784298	-5.08789
ENSG00000089486	CDIP1	0.0270215	0.747431	0.118298	0.906026	0.983571	-5.48515
ENSG00000089505	CMTM1	-0.141674	0.967099	-0.479783	0.63224	0.925331	-5.42029
ENSG00000089597	GANAB	-0.308573	2.65471	-1.86102	0.0651492	0.572343	-4.12765
ENSG00000089639	GMIP	-0.0140975	3.79531	-0.0696272	0.944604	0.990286	-5.64397
ENSG00000089692	LAG3	0.266772	-0.604799	0.966728	0.335593	0.80941	-4.94982
ENSG00000089693	MLF2	-0.0275978	3.21303	-0.190696	0.849081	0.972528	-5.62632
ENSG00000089737	DDX24	-0.0976561	2.18458	-0.505579	0.614064	0.919117	-5.49913
ENSG00000089775	ZBTB25	0.399246	0.225815	2.34932	0.0204146	0.449577	-3.23108
ENSG00000089818	NECAP1	0.0223075	2.56657	0.129247	0.897375	0.98263	-5.61976
ENSG00000089820	ARHGAP4	-0.110718	3.28188	-0.647433	0.518568	0.886094	-5.45816
ENSG00000089876	DHX32	-0.198585	0.252537	-0.792896	0.429378	0.851211	-5.18018
ENSG00000089902	RCOR1	-0.105302	1.88222	-0.576419	0.565394	0.905038	-5.4511
ENSG00000089916	GPATCH2L	0.185327	2.26234	1.1929	0.235224	0.755306	-4.994
ENSG00000090006	LTBP4	-0.32069	1.40935	-1.17509	0.242245	0.762117	-4.97213
ENSG00000090013	BLVRB	-0.338034	2.52846	-1.44307	0.151562	0.69737	-4.71881
ENSG00000090020	SLC9A1	-0.24085	1.50372	-1.74155	0.0841082	0.602383	-4.27756
ENSG00000090054	SPTLC1	-0.105837	2.51927	-0.58137	0.562064	0.904752	-5.4753
ENSG00000090060	PAPOLA	0.135984	3.97246	1.28081	0.20269	0.726484	-4.92628
ENSG00000090061	CCNK	0.297204	2.11209	2.10907	0.0369832	0.516629	-3.69937
ENSG00000090104	RGS1	0.811036	2.42544	2.79301	0.00606512	0.374379	-2.31256
ENSG00000090238	YPEL3	-0.158999	3.80566	-0.624219	0.53365	0.892299	-5.47447
ENSG00000090263	MRPS33	-0.259514	0.171141	-0.96409	0.336908	0.809698	-5.04942
ENSG00000090266	NDUFB2	-0.270266	2.94205	-1.3394	0.182931	0.715313	-4.85133
ENSG00000090273	NUDC	-0.0609946	2.10168	-0.285398	0.775824	0.959393	-5.57141
ENSG00000090316	MAEA	-0.017286	3.92934	-0.092165	0.926718	0.988617	-5.64315
ENSG00000090339	ICAM1	0.598647	4.78784	2.75131	0.006841	0.374379	-2.40846
ENSG00000090372	STRN4	-0.108678	3.24336	-0.749632	0.45492	0.863132	-5.3946
ENSG00000090376	IRAK3	0.561195	4.3129	2.1042	0.0374139	0.516962	-3.72608
ENSG00000090382	LYZ	-0.70555	6.49792	-3.15211	0.0020401	0.335208	-1.44432
ENSG00000090432	MUL1	-0.00315088	0.0454069	-0.0158401	0.987388	0.998649	-5.40567
ENSG00000090487	SPG21	-0.214679	3.15706	-1.70157	0.0913839	0.616833	-4.37856
ENSG00000090520	DNAJB11	0.130145	1.94492	0.694526	0.488673	0.87344	-5.38602
ENSG00000090581	GNPTG	-0.0917046	2.57349	-0.526659	0.599387	0.916348	-5.50559
ENSG00000090615	GOLGA3	-0.133185	1.86573	-0.699091	0.485826	0.873032	-5.38241
ENSG00000090621	PABPC4	-0.216368	3.16852	-1.17709	0.24145	0.761793	-5.03258
ENSG00000090661	CERS4	-0.0269914	1.44492	-0.12064	0.904174	0.983571	-5.55713
ENSG00000090674	MCOLN1	0.0403769	3.95674	0.241954	0.809222	0.965803	-5.62055
ENSG00000090686	USP48	-0.0301366	1.74296	-0.183536	0.854682	0.973484	-5.57102
ENSG00000090857	PDPR	0.190479	0.818143	1.27265	0.205563	0.728477	-4.81946
ENSG00000090861	AARS1	-0.135585	1.27282	-0.703742	0.482934	0.872054	-5.33719
ENSG00000090863	GLG1	-0.131596	2.17074	-1.04244	0.29927	0.79194	-5.13736
ENSG00000090905	TNRC6A	-0.209707	1.2777	-1.07714	0.283543	0.781534	-5.05538
ENSG00000090924	PLEKHG2	0.0371831	3.41941	0.133718	0.893846	0.98203	-5.63397
ENSG00000090989	EXOC1	0.157617	0.97788	0.806793	0.421356	0.847299	-5.2396
ENSG00000091039	OSBPL8	0.138482	3.58915	0.777061	0.438627	0.856161	-5.37918
ENSG00000091073	DTX2	0.0752361	3.58077	0.473272	0.636865	0.926314	-5.54637
ENSG00000091106	NLRC4	-0.173698	1.26253	-0.756471	0.450825	0.862067	-5.30258
ENSG00000091136	LAMB1	0.0283161	1.00575	0.118985	0.905483	0.983571	-5.5137
ENSG00000091140	DLD	-0.0778614	2.08239	-0.430921	0.667287	0.936256	-5.5263
ENSG00000091157	WDR7	-0.403134	0.938467	-2.21698	0.0284777	0.480848	-3.47976
ENSG00000091164	TXNL1	0.224635	1.46346	1.50124	0.135878	0.680786	-4.60053
ENSG00000091317	CMTM6	0.181721	4.0442	1.07261	0.285564	0.782162	-5.1404
ENSG00000091409	ITGA6	-0.0614539	0.211835	-0.303647	0.761914	0.956755	-5.39141
ENSG00000091436	MAP3K20	0.0900012	1.62483	0.511702	0.609784	0.917375	-5.46153
ENSG00000091483	FH	-0.194509	0.131663	-0.955789	0.341069	0.811769	-5.05188
ENSG00000091490	SEL1L3	-0.0223502	1.80238	-0.136224	0.891869	0.981507	-5.58234
ENSG00000091527	CDV3	-0.113333	3.23846	-0.639815	0.523493	0.887423	-5.46079
ENSG00000091542	ALKBH5	-0.260196	1.57438	-1.28364	0.201701	0.725138	-4.86778
ENSG00000091592	NLRP1	-0.125781	1.80705	-0.633419	0.527646	0.889739	-5.41582
ENSG00000091640	SPAG7	0.154774	2.67602	0.996016	0.321214	0.801723	-5.19477
ENSG00000091651	ORC6	0.0139159	2.67075	0.058066	0.953791	0.992239	-5.62679
ENSG00000092010	PSME1	0.0866193	3.62368	0.485351	0.628298	0.92443	-5.54097
ENSG00000092020	PPP2R3C	0.359547	2.03878	1.823	0.0707524	0.586269	-4.17111
ENSG00000092036	HAUS4	0.0262883	1.80163	0.145947	0.884204	0.978939	-5.57824
ENSG00000092068	SLC7A8	-0.94984	1.16356	-3.45384	0.000760583	0.308698	-0.701153
ENSG00000092094	OSGEP	0.103815	0.994365	0.663644	0.50817	0.881175	-5.3312
ENSG00000092098	RNF31	0.161699	2.18149	0.925052	0.356765	0.820074	-5.23602
ENSG00000092108	SCFD1	0.172997	2.17138	0.976405	0.330796	0.808899	-5.1933
ENSG00000092140	G2E3	0.0385377	1.26046	0.133733	0.893834	0.98203	-5.53216
ENSG00000092148	HECTD1	0.145864	2.47414	0.967375	0.335271	0.80941	-5.2128
ENSG00000092199	HNRNPC	0.336089	5.44845	2.60685	0.0102772	0.39258	-2.72874
ENSG00000092201	SUPT16H	-0.14256	1.14639	-0.897191	0.371384	0.826566	-5.19553
ENSG00000092203	TOX4	0.106304	2.38736	0.703083	0.483343	0.872054	-5.40295
ENSG00000092208	GEMIN2	-0.145789	0.0613129	-0.501048	0.61724	0.919117	-5.3044
ENSG00000092330	TINF2	0.181082	2.54046	1.16524	0.246196	0.764807	-5.03183
ENSG00000092439	TRPM7	0.429228	1.4242	2.71856	0.00751247	0.374379	-2.48195
ENSG00000092529	CAPN3	-0.349292	0.585055	-2.04672	0.0428334	0.535313	-3.76216
ENSG00000092531	SNAP23	0.23908	3.325	1.45343	0.148672	0.690016	-4.71806
ENSG00000092621	PHGDH	-0.173358	0.19921	-0.584898	0.559696	0.903666	-5.28793
ENSG00000092820	EZR	-0.166153	4.1775	-0.693159	0.489528	0.874075	-5.43296
ENSG00000092841	MYL6	-0.135378	6.98204	-1.00531	0.316739	0.798422	-5.18171
ENSG00000092847	AGO1	-0.236121	0.237949	-1.59019	0.114379	0.653589	-4.41119
ENSG00000092871	RFFL	0.150096	2.79229	0.814044	0.417206	0.844618	-5.34208
ENSG00000092929	UNC13D	-0.07428	4.20533	-0.425498	0.671223	0.936697	-5.56654
ENSG00000092931	MFSD11	0.279142	1.65713	1.77292	0.078738	0.598473	-4.2341
ENSG00000092964	DPYSL2	-0.187394	2.08665	-0.909691	0.364779	0.822651	-5.24492
ENSG00000093000	NUP50	-0.0671028	2.72169	-0.461606	0.645186	0.928826	-5.53822
ENSG00000093010	COMT	-0.508172	2.62881	-2.02268	0.0452928	0.544817	-3.85983
[truncated: 8,689 more rows]
